# Supplementary material
Source: publisher site journal article supplement (https://www.dovepress.com/article/447915)
Supplement: Supplementary file 1 [file get_supplementary_file.php]

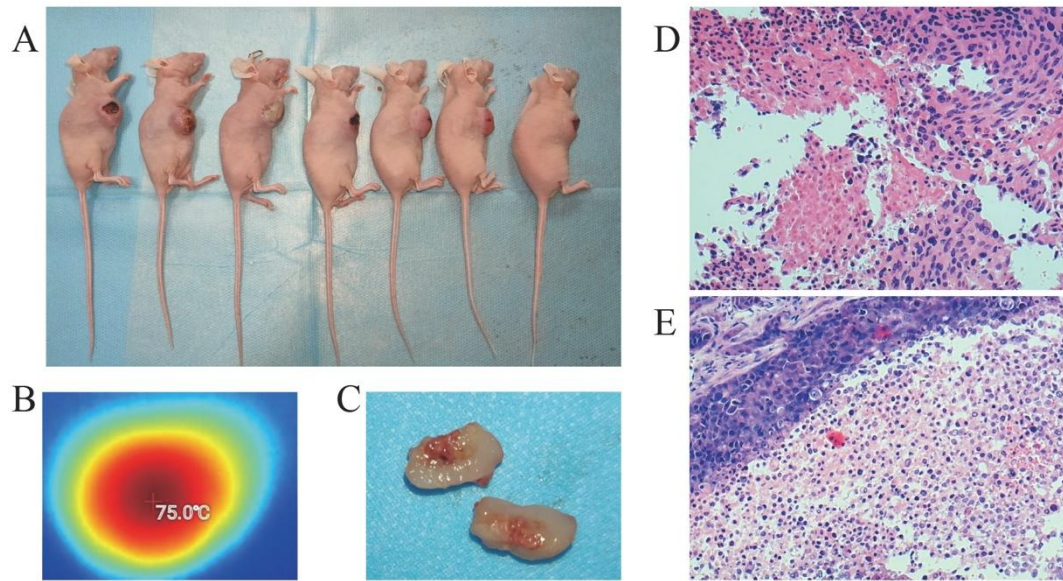

Figure S1 Establishment of incomplete ablation model and histopathological evaluation. (A) Excessive anesthesia treatment in nude mice after incomplete ablation; (B) During ablation, the surface skin temperature of nude mice reaches a maximum of 75°C, and the heat radiates in a ring shape; (C) the tumor after incomplete ablation, and the area around the ablation center showed typical white necrotic areas; (D) HE staining of incomplete ablation tissue showed that coexistence of necrotic and degeneration cells (x40); (E) HE staining of the control tissue showed that coexistence of necrotic areas normal tumor cells, but there is no degeneration (x40).

Table S1 Big data information included for the calculation of differentially expressed genes

| Datasets    | Non-tumor | Tumor | Platform | Country     |
|-------------|-----------|-------|----------|-------------|
| TCGA-GTEX   | 276       | 371   | /        | USA         |
| E-MTAB-4171 | 15        | 15    | /        | USA         |
| E-MTAB-8887 | 17        | 23    | /        | Germany     |
| GSE22405    | 24        | 24    | GPL10553 | USA         |
| GSE31370    | 5         | 15    | GPL10558 | USA         |
| GSE36376    | 193       | 240   | GPL10558 | USA         |
| GSE36411    | 42        | 42    | GPL10558 | China       |
| GSE39791    | 72        | 72    | GPL10558 | USA         |
| GSE57957    | 39        | 39    | GPL10558 | China       |
| GSE76427    | 52        | 115   | GPL10558 | China       |
| GSE25097    | 289       | 268   | GPL10687 | China       |
| GSE33294    | 3         | 3     | GPL10999 | China       |
| GSE114564   | 45        | 63    | GPL11154 | South Korea |
| GSE148355   | 45        | 0     | GPL11154 | South Korea |
| GSE63863    | 12        | 12    | GPL11154 | China       |
| GSE65485    | 5         | 50    | GPL11154 | Singapore   |
| GSE73708    | 4         | 8     | GPL11154 | South Korea |
| GSE81550    | 3         | 3     | GPL11154 | USA         |
| GSE87592    | 26        | 27    | GPL11154 | Spain       |
| GSE46444    | 48        | 88    | GPL13369 | China       |
| GSE63898    | 168       | 228   | GPL13667 | USA         |
| GSE50579    | 10        | 67    | GPL14550 | Germany     |
| GSE57727    | 5         | 57    | GPL14951 | USA         |
| GSE98617    | 13        | 36    | GPL14951 | China       |
| GSE56545    | 21        | 21    | GPL15433 | Singapore   |
| GSE114783   | 26        | 10    | GPL15491 | China       |
| GSE113996   | 20        | 20    | GPL16043 | China       |
| GSE74656    | 5         | 5     | GPL16043 | China       |
| GSE57555    | 5         | 5     | GPL16699 | Japan       |
| GSE104310   | 8         | 12    | GPL16791 | China       |
| GSE63018    | 9         | 8     | GPL16791 | South Korea |

|                       |     |     |          |             |
|-----------------------|-----|-----|----------|-------------|
| GSE77509              | 20  | 20  | GPL16791 | China       |
| GSE94660              | 21  | 21  | GPL16791 | USA         |
| GSE97214              | 9   | 9   | GPL16791 | China       |
| GSE140845             | 5   | 5   | GPL16791 | India       |
| GSE112221             | 6   | 4   | GPL16791 | USA         |
| GSE128274             | 4   | 4   | GPL16853 | Italy       |
| GSE54238              | 30  | 26  | GPL16955 | USA         |
| GSE67764              | 6   | 3   | GPL17077 | China       |
| GSE76311-<br>GPL17586 | 59  | 62  | GPL17586 | USA         |
| GSE59259              | 8   | 8   | GPL18451 | South Korea |
| GSE20140              | 34  | 35  | GPL18461 | USA         |
| GSE115018             | 12  | 12  | GPL20115 | China       |
| GSE125469             | 3   | 3   | GPL20301 | China       |
| GSE124535             | 35  | 35  | GPL20795 | South Korea |
| GSE101728             | 7   | 7   | GPL21047 | China       |
| GSE98269              | 3   | 3   | GPL21047 | China       |
| GSE166163             | 3   | 3   | GPL23126 | China       |
| GSE14520              | 220 | 225 | GPL3921  | USA         |
| GSE46408              | 6   | 6   | GPL4133  | China       |
| GSE12941              | 10  | 10  | GPL5175  | Japan       |
| GSE84005              | 38  | 38  | GPL5175  | China       |
| GSE10143              | 307 | 80  | GPL5474  | USA         |
| GSE101685             | 8   | 24  | GPL570   | China       |
| GSE102079             | 105 | 152 | GPL570   | Japan       |
| GSE107170             | 189 | 118 | GPL570   | Italy       |
| GSE112790             | 15  | 183 | GPL570   | Japan       |
| GSE121248             | 37  | 70  | GPL570   | Singapore   |
| GSE17548              | 20  | 17  | GPL570   | Turkey      |
| GSE19665              | 10  | 10  | GPL570   | Japan       |
| GSE29721              | 10  | 10  | GPL570   | Canada      |
| GSE33006              | 3   | 3   | GPL570   | China       |
| GSE41804              | 20  | 20  | GPL570   | Japan       |
| GSE45436              | 41  | 93  | GPL570   | China       |

|           |    |     |         |             |
|-----------|----|-----|---------|-------------|
| GSE6222   | 2  | 10  | GPL570  | China       |
| GSE62232  | 10 | 81  | GPL570  | France      |
| GSE6764   | 40 | 35  | GPL570  | USA         |
| GSE99807  | 4  | 4   | GPL570  | China       |
| GSE84402  | 14 | 14  | GPL570  | China       |
| GSE14323  | 60 | 55  | GPL571  | USA         |
| GSE14520  | 21 | 22  | GPL571  | USA         |
| GSE17967  | 47 | 16  | GPL571  | USA         |
| GSE9839   | 3  | 3   | GPL571  | Switzerland |
| GSE45050  | 10 | 6   | GPL6244 | USA         |
| GSE64041  | 65 | 60  | GPL6244 | Switzerland |
| GSE117361 | 2  | 2   | GPL6480 | China       |
| GSE54236  | 80 | 81  | GPL6480 | Italy       |
| GSE22058  | 97 | 100 | GPL6793 | USA         |
| GSE87630  | 30 | 64  | GPL6947 | USA         |
| GSE89377  | 67 | 40  | GPL6947 | China       |
| GSE25599  | 10 | 10  | GPL9052 | USA         |
| GSE77314  | 50 | 50  | GPL9052 | South Korea |
| GSE55048  | 4  | 4   | GPL9115 | Spain       |
| GSE60502  | 18 | 18  | GPL96   | China       |

---

Table S2 The differentially expressed genes based on big data

| Symbol      | Heterogeneity | Standardized mean difference(SMD) | P-value |
|-------------|---------------|-----------------------------------|---------|
| PRTG        | 0.243         | 0.0594                            | 0.0373  |
| KCND2       | 0.391         | 0.0608                            | 0.0131  |
| TAAR9       | 0.423         | 0.063                             | 0.0387  |
| TKTL2       | 0.479         | 0.0639                            | 0.0281  |
| SLC28A2     | 0.383         | 0.0659                            | 0.0126  |
| OR52K2      | 0.437         | 0.0669                            | 0.0488  |
| LPAR3       | 0.498         | 0.0716                            | 0.0118  |
| OR1J2       | 0.416         | 0.0723                            | 0.0172  |
| OTOP1       | 0.373         | 0.0799                            | 0.0286  |
| OOEP        | 0.342         | 0.0806                            | 0.0182  |
| H2BFWT      | 0.358         | 0.0818                            | 0.019   |
| OR51L1      | 0.485         | 0.0821                            | 0.0223  |
| TMEM63C     | 0.258         | 0.0847                            | 0.0035  |
| SERPINI2    | 0.293         | 0.0858                            | 0.0014  |
| KBTBD12     | 0.169         | 0.0859                            | 0.0028  |
| TMEM51-AS1  | 0.077         | 0.0861                            | 0.041   |
| FLJ40288    | 0.477         | 0.0863                            | 0.0413  |
| EIF1B-AS1   | 0.265         | 0.0863                            | 0.0469  |
| PDZRN3-AS1  | 0.073         | 0.0866                            | 0.0486  |
| WFDC12      | 0.291         | 0.0874                            | 0.0028  |
| OR52E4      | 0.278         | 0.0874                            | 0.0153  |
| COX8C       | 0.493         | 0.0878                            | 0.0012  |
| OR2AT4      | 0.412         | 0.0881                            | 0.0122  |
| LOC541472   | 0             | 0.089                             | 0.0305  |
| LZTS1-AS1   | 0.285         | 0.0892                            | 0.0414  |
| C5orf66-AS1 | 0.401         | 0.0904                            | 0.0443  |
| LINC00973   | 0.43          | 0.0908                            | 0.0412  |
| RRS1-AS1    | 0.399         | 0.0915                            | 0.0406  |
| LRP1B       | 0.407         | 0.0916                            | 0.0002  |
| DIRAS2      | 0.512         | 0.0918                            | 0.0359  |

|              |       |        |        |
|--------------|-------|--------|--------|
| POTEB        | 0.497 | 0.0944 | 0.0318 |
| SLAMF9       | 0.292 | 0.0946 | 0.0008 |
| OR6C2        | 0.402 | 0.0952 | 0.008  |
| RPS4Y2       | 0.432 | 0.0972 | 0.0047 |
| LINC00408    | 0     | 0.0976 | 0.0296 |
| HOXB9        | 0.576 | 0.0983 | 0.0354 |
| LINC01254    | 0     | 0.0987 | 0.0291 |
| PAK3         | 0.534 | 0.1009 | 0.0353 |
| TAAR6        | 0.296 | 0.1012 | 0.0039 |
| DGCR12       | 0     | 0.1014 | 0.0213 |
| ERAP2        | 0.46  | 0.1026 | 0.0002 |
| MIR125B2     | 0.417 | 0.1044 | 0.0194 |
| LHX8         | 0.552 | 0.1047 | 0.0428 |
| LOC728392    | 0     | 0.105  | 0.0221 |
| OR8B8        | 0.501 | 0.1053 | 0.0423 |
| LINC00561    | 0     | 0.1056 | 0.0195 |
| LOC100507564 | 0.247 | 0.1058 | 0.043  |
| LINC00938    | 0     | 0.1059 | 0.0436 |
| SPAG17       | 0.352 | 0.106  | 0.0002 |
| PHGR1        | 0.086 | 0.1066 | 0.0033 |
| ANKRD34B     | 0.472 | 0.1069 | 0.0012 |
| SYNPR-AS1    | 0.304 | 0.1069 | 0.0149 |
| LOC101929528 | 0     | 0.1078 | 0.0499 |
| LOC101927588 | 0     | 0.1083 | 0.049  |
| LOC100506289 | 0.077 | 0.1088 | 0.0375 |
| EIF3J        | 0.656 | 0.1089 | 0.0462 |
| PCAT4        | 0.267 | 0.1097 | 0.0084 |
| SYCP2L       | 0.547 | 0.1099 | 0.036  |
| SNORD15B     | 0.449 | 0.1102 | 0.0162 |
| SLC25A5-AS1  | 0.326 | 0.1113 | 0.0056 |
| LINC00470    | 0.391 | 0.1115 | 0.005  |
| DAW1         | 0.145 | 0.1115 | 0.0059 |
| LINC00615    | 0     | 0.1122 | 0.0078 |

|              |       |        |         |
|--------------|-------|--------|---------|
| CAMKV        | 0.694 | 0.1126 | 0.041   |
| PCDHB5       | 0.615 | 0.1126 | 0.0491  |
| OR9A2        | 0.405 | 0.113  | 0.0014  |
| LIN28A       | 0.469 | 0.1131 | 0.0004  |
| LINC01208    | 0     | 0.1134 | 0.0116  |
| SLC15A5      | 0.476 | 0.1137 | 0.0293  |
| ATP1A4       | 0.587 | 0.1141 | 0.0401  |
| LOC101929550 | 0.407 | 0.1145 | 0.0231  |
| FAM135B      | 0.653 | 0.1152 | 0.0454  |
| LOC101929076 | 0.127 | 0.1153 | 0.0361  |
| USP26        | 0.58  | 0.1153 | 0.0424  |
| TMEM132B     | 0.305 | 0.1156 | <0.0001 |
| DHX38        | 0.734 | 0.1158 | 0.0498  |
| LOC101927020 | 0     | 0.1173 | 0.033   |
| MUC5B        | 0.404 | 0.1178 | <0.0001 |
| SFRP2        | 0.145 | 0.1179 | <0.0001 |
| BRDT         | 0.28  | 0.1184 | <0.0001 |
| LOC101929586 | 0     | 0.119  | 0.0304  |
| OR6C70       | 0.348 | 0.1193 | 0.0011  |
| SERPINB5     | 0.598 | 0.1199 | 0.0188  |
| CLCNKB       | 0.712 | 0.1201 | 0.037   |
| SMYD1        | 0.551 | 0.1202 | 0.0278  |
| GAGE2C       | 0.391 | 0.1207 | 0.033   |
| KCTD5        | 0.722 | 0.1211 | 0.0359  |
| TOPAZ1       | 0.177 | 0.1215 | 0.0376  |
| SCARNA14     | 0.218 | 0.1216 | 0.0153  |
| SCAND1       | 0.689 | 0.122  | 0.0355  |
| PNLIPRP3     | 0.561 | 0.1222 | 0.0342  |
| CHAC1        | 0.746 | 0.1226 | 0.0413  |
| CACNA2D3     | 0.681 | 0.1235 | 0.0216  |
| LINC00616    | 0.468 | 0.1237 | 0.0039  |
| TEX101       | 0.611 | 0.124  | 0.0374  |
| SLC22A18AS   | 0.657 | 0.1243 | 0.0355  |

|              |       |        |         |
|--------------|-------|--------|---------|
| LINC01343    | 0.345 | 0.1249 | 0.005   |
| OR2T5        | 0.414 | 0.1253 | 0.0158  |
| LOC102724612 | 0     | 0.1255 | 0.0225  |
| APEH         | 0.767 | 0.126  | 0.0443  |
| LRCH2        | 0.337 | 0.126  | <0.0001 |
| GRID1        | 0.567 | 0.1262 | 0.0122  |
| CADM4        | 0.511 | 0.1265 | 0.0058  |
| ALDH16A1     | 0.617 | 0.1274 | 0.0162  |
| MARK1        | 0.397 | 0.1279 | <0.0001 |
| PTPRG-AS1    | 0.4   | 0.1287 | 0.0031  |
| LOC645188    | 0.033 | 0.1288 | 0.0071  |
| LOC101927884 | 0     | 0.1289 | 0.0191  |
| RENBP        | 0.771 | 0.1289 | 0.0485  |
| APOL5        | 0.511 | 0.1291 | 0.0028  |
| MAGEB10      | 0.521 | 0.1292 | 0.0163  |
| KIF5C        | 0.664 | 0.13   | 0.0127  |
| KIF3C        | 0.809 | 0.13   | 0.0497  |
| FHL5         | 0.569 | 0.1304 | 0.0049  |
| TUBB7P       | 0.441 | 0.1305 | 0.0015  |
| LINC00951    | 0.496 | 0.1305 | 0.0017  |
| LOC101929297 | 0     | 0.1308 | 0.0174  |
| LRRC2-AS1    | 0.421 | 0.131  | 0.0028  |
| LOC101928135 | 0     | 0.131  | 0.0173  |
| TP63         | 0.614 | 0.1312 | 0.0221  |
| YPEL3        | 0.578 | 0.1314 | 0.0182  |
| ASB15        | 0.311 | 0.1315 | <0.0001 |
| LUZP4        | 0.761 | 0.1316 | 0.0364  |
| TFCP2L1      | 0.385 | 0.1325 | <0.0001 |
| CALR3        | 0.484 | 0.1328 | <0.0001 |
| CGA          | 0.784 | 0.1329 | 0.0371  |
| LOC100130331 | 0.387 | 0.1338 | 0.0024  |
| LINC01191    | 0.093 | 0.1339 | 0.0026  |
| CTDSPL       | 0.788 | 0.1341 | 0.035   |



|           |       |        |        |
|-----------|-------|--------|--------|
| CA9       | 0.796 | 0.1341 | 0.0384 |
| SIAH2     | 0.769 | 0.1342 | 0.0457 |
| COL10A1   | 0.809 | 0.1344 | 0.0425 |
| EFR3B     | 0.701 | 0.1345 | 0.0395 |
| SIM1      | 0.716 | 0.1349 | 0.0322 |
| DCAF6     | 0.707 | 0.1349 | 0.0392 |
| LACTB2    | 0.616 | 0.1351 | 0.0064 |
| UAP1L1    | 0.713 | 0.1354 | 0.0255 |
| CCDC58    | 0.754 | 0.1358 | 0.0433 |
| SFXN3     | 0.79  | 0.1359 | 0.0456 |
| DNPEP     | 0.811 | 0.1359 | 0.0489 |
| LINC01134 | 0.311 | 0.136  | 0.0024 |
| FAM182A   | 0.228 | 0.136  | 0.0127 |
| LINC00473 | 0.206 | 0.1361 | 0.005  |
| SBSPON    | 0.443 | 0.1364 | 0.0003 |
| PROK1     | 0.712 | 0.1364 | 0.0324 |
| SPERT     | 0.627 | 0.1364 | 0.0356 |
| NYAP2     | 0.484 | 0.1366 | 0.0006 |
| ABCA12    | 0.553 | 0.1367 | 0.003  |
| ATP1A2    | 0.711 | 0.1367 | 0.0121 |
| C1orf100  | 0.693 | 0.1367 | 0.0302 |
| H2BFM     | 0.38  | 0.1368 | 0.0001 |
| DLX2      | 0.777 | 0.137  | 0.0283 |
| SLC6A15   | 0.592 | 0.1371 | 0.0081 |
| ADAM21P1  | 0     | 0.1371 | 0.0447 |
| SLC36A2   | 0.617 | 0.1372 | 0.036  |
| USH1C     | 0.664 | 0.1379 | 0.0147 |
| ALDH1L2   | 0.682 | 0.1379 | 0.0202 |
| PKD2L1    | 0.733 | 0.1381 | 0.0267 |
| STK32B    | 0.767 | 0.1384 | 0.0375 |
| RHBDL2    | 0.681 | 0.1385 | 0.0274 |
| MIR618    | 0.101 | 0.1388 | 0.0316 |
| CDIPT     | 0.831 | 0.1389 | 0.0484 |

|            |       |        |         |
|------------|-------|--------|---------|
| APCDD1L    | 0.734 | 0.139  | 0.0258  |
| CACNA1E    | 0.781 | 0.1393 | 0.0312  |
| TTC28      | 0.783 | 0.1398 | 0.0469  |
| KRT8P41    | 0.424 | 0.14   | 0.0148  |
| PRSS3      | 0.757 | 0.14   | 0.0333  |
| BCRP2      | 0.485 | 0.1401 | 0.0133  |
| FLNA       | 0.816 | 0.1401 | 0.0373  |
| SCN1A      | 0.256 | 0.1402 | <0.0001 |
| CSMD3      | 0.687 | 0.1406 | 0.0187  |
| RAET1L     | 0.041 | 0.1406 | <0.0001 |
| NOVA1      | 0.789 | 0.1409 | 0.0374  |
| OR14J1     | 0.445 | 0.141  | <0.0001 |
| SIAH1P1    | 0.01  | 0.1412 | 0.0492  |
| GPR20      | 0.826 | 0.1415 | 0.0451  |
| TRIM36-IT1 | 0     | 0.1418 | 0.0476  |
| RNU2-71P   | 0     | 0.1418 | 0.0482  |
| PCSK1      | 0.787 | 0.142  | 0.036   |
| GUCA2A     | 0.821 | 0.1421 | 0.0384  |
| LOC780529  | 0.365 | 0.1422 | 0.0052  |
| GNRHR2     | 0.626 | 0.1424 | 0.0234  |
| VLDLR-AS1  | 0     | 0.1425 | 0.0395  |
| RGS22      | 0.601 | 0.1426 | 0.013   |
| UNC5D      | 0.619 | 0.1427 | 0.0146  |
| PEX26      | 0.777 | 0.1427 | 0.0368  |
| LINC00529  | 0.023 | 0.1428 | 0.0042  |
| ZNF350     | 0.79  | 0.1428 | 0.0483  |
| ICA1       | 0.757 | 0.143  | 0.0161  |
| FAM151B    | 0.552 | 0.143  | 0.0202  |
| TCIRG1     | 0.748 | 0.143  | 0.0222  |
| TMEM72     | 0.634 | 0.1432 | 0.04    |
| GRIN2C     | 0.803 | 0.1433 | 0.0285  |
| HSD3BP4    | 0.275 | 0.1435 | 0.0193  |
| RHBDD2     | 0.668 | 0.1435 | 0.0208  |

|              |       |        |         |
|--------------|-------|--------|---------|
| ZNF507       | 0.801 | 0.1435 | 0.048   |
| CARS2        | 0.686 | 0.1436 | 0.0117  |
| NCF2         | 0.794 | 0.1438 | 0.0357  |
| VDAC1P4      | 0     | 0.1438 | 0.0396  |
| TAB3         | 0.649 | 0.1439 | 0.0463  |
| RNU6-998P    | 0     | 0.144  | 0.0447  |
| LOC101928069 | 0     | 0.1442 | 0.0088  |
| LRFN1        | 0.659 | 0.1443 | 0.0144  |
| RNU2-11P     | 0     | 0.1443 | 0.0444  |
| RN7SL836P    | 0.184 | 0.1443 | 0.0445  |
| RN7SKP42     | 0     | 0.1446 | 0.0413  |
| SPINT3       | 0.496 | 0.1446 | <0.0001 |
| CERK         | 0.793 | 0.1447 | 0.0293  |
| RNU1-101P    | 0     | 0.145  | 0.0432  |
| DPEP1        | 0.832 | 0.1451 | 0.0379  |
| TATDN2P1     | 0     | 0.1452 | 0.043   |
| MIR4753      | 0     | 0.1452 | 0.043   |
| IL31RA       | 0.566 | 0.1456 | 0.0041  |
| TM4SF5       | 0.595 | 0.1456 | 0.0047  |
| TREML4       | 0.386 | 0.1456 | <0.0001 |
| DOCK3        | 0.812 | 0.1458 | 0.0335  |
| EPHA4        | 0.781 | 0.1459 | 0.0194  |
| NDUFV3       | 0.74  | 0.146  | 0.0403  |
| MRPL4        | 0.786 | 0.1462 | 0.0353  |
| MIR203A      | 0.452 | 0.1462 | 0.0394  |
| GAL          | 0.81  | 0.1466 | 0.0305  |
| TRPC3        | 0.802 | 0.1467 | 0.0352  |
| SLC9C1       | 0.487 | 0.1468 | 0.0107  |
| RNU6-198P    | 0.457 | 0.1468 | 0.041   |
| RNU6-157P    | 0.483 | 0.1468 | 0.041   |
| MYLIP        | 0.702 | 0.1469 | 0.0137  |
| RNU2-72P     | 0     | 0.1478 | 0.0371  |
| CHST11       | 0.786 | 0.1479 | 0.0222  |

|            |       |        |        |
|------------|-------|--------|--------|
| CCDC103    | 0.746 | 0.1479 | 0.0429 |
| CLLU1OS    | 0.646 | 0.148  | 0.0392 |
| DGKK       | 0.645 | 0.1482 | 0.016  |
| ZNF570     | 0.721 | 0.1483 | 0.0271 |
| GAPDHP22   | 0     | 0.1483 | 0.034  |
| SLC6A6     | 0.813 | 0.1485 | 0.0376 |
| RNU6-899P  | 0     | 0.1485 | 0.0385 |
| RN7SKP80   | 0     | 0.1485 | 0.0386 |
| DNTT       | 0.851 | 0.1485 | 0.0499 |
| FAM110B    | 0.803 | 0.1488 | 0.0303 |
| GGN        | 0.817 | 0.1489 | 0.0454 |
| RNU6-270P  | 0     | 0.1492 | 0.0377 |
| GPR63      | 0.588 | 0.1494 | 0.0017 |
| RNU6-877P  | 0     | 0.1494 | 0.0373 |
| RNU7-4P    | 0     | 0.1494 | 0.0374 |
| RNU2-70P   | 0     | 0.1495 | 0.0374 |
| BCL2L11    | 0.833 | 0.1498 | 0.0393 |
| MIR4306    | 0     | 0.15   | 0.0365 |
| RN7SL442P  | 0     | 0.15   | 0.0366 |
| LAIR1      | 0.855 | 0.15   | 0.0462 |
| GCSAML-AS1 | 0     | 0.1501 | 0.0059 |
| RN7SKP124  | 0.183 | 0.1501 | 0.0343 |
| RNU6-934P  | 0     | 0.1501 | 0.0364 |
| RFX3-AS1   | 0     | 0.1501 | 0.0485 |
| ZFHX3      | 0.743 | 0.1506 | 0.0247 |
| KATNBL1P6  | 0.498 | 0.1507 | 0.0474 |
| PCDHB16    | 0.74  | 0.1507 | 0.0481 |
| WDR25      | 0.669 | 0.1509 | 0.0082 |
| NMNAT2     | 0.571 | 0.151  | 0.0024 |
| C19orf73   | 0.699 | 0.1511 | 0.0252 |
| STX17-AS1  | 0.098 | 0.1511 | 0.0414 |
| DLX1       | 0.735 | 0.1512 | 0.0194 |
| LHX3       | 0.845 | 0.1513 | 0.0446 |

|           |       |        |         |
|-----------|-------|--------|---------|
| FOXL1     | 0.768 | 0.1515 | 0.0149  |
| FTHL17    | 0.746 | 0.1515 | 0.0235  |
| FZD10     | 0.852 | 0.1516 | 0.0413  |
| FAM118A   | 0.806 | 0.1517 | 0.0249  |
| RN7SL65P  | 0     | 0.1518 | 0.0344  |
| OFCC1     | 0.542 | 0.152  | 0.0051  |
| DOK5      | 0.85  | 0.152  | 0.0471  |
| RNU6-552P | 0     | 0.1522 | 0.034   |
| AACSP1    | 0.398 | 0.1523 | 0.0003  |
| LINC00517 | 0.414 | 0.1525 | 0.0266  |
| IDH1      | 0.844 | 0.1528 | 0.0374  |
| URAD      | 0     | 0.1529 | 0.0246  |
| NCOR1P1   | 0.162 | 0.153  | 0.0165  |
| CIDEC     | 0.772 | 0.1531 | 0.0163  |
| RNU5E-4P  | 0     | 0.1533 | 0.0218  |
| FAM27E5   | 0     | 0.1535 | 0.0383  |
| MIR6885   | 0.237 | 0.1535 | 0.0495  |
| NCBP1     | 0.834 | 0.1539 | 0.0493  |
| RNU6-918P | 0     | 0.154  | 0.0319  |
| RN7SL70P  | 0     | 0.154  | 0.032   |
| CSTF2T    | 0.8   | 0.1541 | 0.0218  |
| POTEC     | 0.373 | 0.1542 | 0.0003  |
| AZI2      | 0.681 | 0.1544 | 0.0045  |
| RPL23AP14 | 0     | 0.1544 | 0.0259  |
| RN7SKP57  | 0     | 0.1544 | 0.0295  |
| AMPD3     | 0.833 | 0.1544 | 0.03    |
| RNU6-249P | 0     | 0.1545 | 0.0313  |
| MAGEF1    | 0.699 | 0.1546 | 0.0057  |
| LRRC63    | 0.466 | 0.1546 | <0.0001 |
| TACC1     | 0.835 | 0.1547 | 0.0403  |
| MPZL2     | 0.763 | 0.1548 | 0.0265  |
| CHRM3-AS1 | 0     | 0.1548 | 0.0269  |
| CCL28     | 0.752 | 0.1549 | 0.0186  |

|            |       |        |        |
|------------|-------|--------|--------|
| OPLAH      | 0.764 | 0.155  | 0.0257 |
| RN7SKP112  | 0     | 0.1552 | 0.0287 |
| RPS15AP25  | 0     | 0.1553 | 0.0304 |
| RN7SKP224  | 0.447 | 0.1553 | 0.0307 |
| LRGUK      | 0.804 | 0.1553 | 0.0325 |
| LINC01503  | 0     | 0.1555 | 0.0412 |
| ZNF781     | 0.799 | 0.1556 | 0.0466 |
| CACNG1     | 0.855 | 0.1558 | 0.0398 |
| HSPD1P1    | 0     | 0.156  | 0.0257 |
| TOR1AIP1   | 0.794 | 0.1563 | 0.0295 |
| RNU6-1170P | 0.405 | 0.1563 | 0.0296 |
| RNU6-63P   | 0.226 | 0.1564 | 0.0193 |
| RNU1-80P   | 0     | 0.1565 | 0.0294 |
| TFAP2A     | 0.849 | 0.1565 | 0.0468 |
| BNIP1      | 0.817 | 0.1567 | 0.0243 |
| PLS1-AS1   | 0     | 0.1567 | 0.0292 |
| TYW1       | 0.784 | 0.1567 | 0.0349 |
| ACSBG2     | 0.736 | 0.1568 | 0.0089 |
| TMEM91     | 0.736 | 0.1568 | 0.0364 |
| TGIF2P1    | 0     | 0.1569 | 0.041  |
| TRIM64EP   | 0     | 0.157  | 0.041  |
| RAB40AL    | 0.543 | 0.1571 | 0.0089 |
| RN7SL569P  | 0     | 0.1572 | 0.0285 |
| MACROD2    | 0.751 | 0.1573 | 0.0146 |
| SVOPL      | 0.544 | 0.1574 | 0.0033 |
| PPY        | 0.598 | 0.1575 | 0.002  |
| CYP1D1P    | 0     | 0.1575 | 0.0403 |
| ALPI       | 0.789 | 0.1576 | 0.0133 |
| RN7SL456P  | 0     | 0.1577 | 0.028  |
| ZNF847P    | 0.497 | 0.1579 | 0.0072 |
| CSTP1      | 0     | 0.1579 | 0.0397 |
| SAFB       | 0.843 | 0.1579 | 0.042  |
| METAP2     | 0.83  | 0.1582 | 0.0326 |

|              |       |        |        |
|--------------|-------|--------|--------|
| SSH3         | 0.774 | 0.1583 | 0.0205 |
| HSPB8        | 0.782 | 0.1584 | 0.0159 |
| UGT1A12P     | 0     | 0.1584 | 0.0392 |
| ELAVL2       | 0.862 | 0.1584 | 0.0392 |
| RPS25        | 0.822 | 0.1584 | 0.048  |
| TRIP6        | 0.809 | 0.1586 | 0.0344 |
| DCAF10       | 0.779 | 0.1586 | 0.0365 |
| SLC22A8      | 0.701 | 0.1587 | 0.008  |
| PTGES        | 0.737 | 0.1587 | 0.0121 |
| KRT85        | 0.81  | 0.1587 | 0.0183 |
| FKBP1B       | 0.805 | 0.1587 | 0.019  |
| PAXIP1-AS2   | 0.281 | 0.1587 | 0.0316 |
| KIAA1656     | 0.385 | 0.1588 | 0.001  |
| MIR425       | 0.332 | 0.1588 | 0.0085 |
| C19orf24     | 0.823 | 0.1588 | 0.0437 |
| YLPM1        | 0.778 | 0.1589 | 0.0262 |
| JUP          | 0.852 | 0.159  | 0.0332 |
| LINC00393    | 0.402 | 0.1591 | 0.0241 |
| RNU6-1272P   | 0.42  | 0.1591 | 0.0268 |
| KTN1         | 0.802 | 0.1593 | 0.0185 |
| IL17B        | 0.843 | 0.1593 | 0.0306 |
| HOXC8        | 0.735 | 0.1595 | 0.0085 |
| RN7SL597P    | 0.459 | 0.1595 | 0.0264 |
| HPRT1        | 0.847 | 0.1595 | 0.0323 |
| GPR143       | 0.861 | 0.1595 | 0.0361 |
| RNU6-132P    | 0.278 | 0.1597 | 0.0262 |
| RN7SKP249    | 0     | 0.1599 | 0.0242 |
| IDI2         | 0.816 | 0.1599 | 0.03   |
| LOC100507557 | 0     | 0.1601 | 0.0013 |
| LINC01363    | 0.452 | 0.1601 | 0.0363 |
| PPIL6        | 0.752 | 0.1603 | 0.0205 |
| RN7SKP146    | 0.207 | 0.1604 | 0.0256 |
| SYNGR1       | 0.841 | 0.1606 | 0.0376 |

|              |       |        |        |
|--------------|-------|--------|--------|
| EPHA1        | 0.877 | 0.1606 | 0.049  |
| OR2T3        | 0.27  | 0.1611 | 0.0005 |
| FBXO11       | 0.817 | 0.1611 | 0.0209 |
| MYCBPAP      | 0.733 | 0.1615 | 0.017  |
| TUNAR        | 0.442 | 0.1618 | 0.0003 |
| LOC101928107 | 0     | 0.1618 | 0.0033 |
| NOS2P3       | 0.377 | 0.1618 | 0.012  |
| RPL29P22     | 0     | 0.1619 | 0.035  |
| EIF1AX       | 0.869 | 0.1619 | 0.0403 |
| ZNF329       | 0.823 | 0.162  | 0.0334 |
| HMGB3P10     | 0     | 0.1621 | 0.0347 |
| AFTPH        | 0.872 | 0.1622 | 0.0477 |
| ZNF560       | 0.649 | 0.1623 | 0.0075 |
| ZNF454       | 0.595 | 0.1623 | 0.0082 |
| BZW1P1       | 0     | 0.1624 | 0.0389 |
| CLSTN2-AS1   | 0     | 0.1625 | 0.0003 |
| FZD3         | 0.53  | 0.1627 | 0.0002 |
| COL17A1      | 0.842 | 0.1627 | 0.0267 |
| MTND4P31     | 0     | 0.1627 | 0.0341 |
| RNU6ATAC34P  | 0.241 | 0.1628 | 0.0218 |
| COX7CP1      | 0.495 | 0.163  | 0.034  |
| TXLNB        | 0.605 | 0.1631 | 0.0041 |
| POLDIP2      | 0.71  | 0.1634 | 0.0095 |
| ZNF90        | 0.691 | 0.1634 | 0.0144 |
| RASSF1       | 0.834 | 0.1635 | 0.0477 |
| LAMB1        | 0.87  | 0.1636 | 0.0386 |
| NARS2        | 0.859 | 0.1636 | 0.047  |
| DLGAP1-AS5   | 0     | 0.1637 | 0.0196 |
| PLPPR3       | 0.408 | 0.1637 | 0.0269 |
| ANKRD13D     | 0.817 | 0.1637 | 0.0292 |
| SGIP1        | 0.811 | 0.1637 | 0.0438 |
| SDHAF3       | 0     | 0.1641 | 0.0267 |
| CDH10        | 0.648 | 0.1642 | 0.0015 |



|           |       |        |         |
|-----------|-------|--------|---------|
| RNF183    | 0.67  | 0.1643 | 0.0096  |
| RNF148    | 0.751 | 0.1643 | 0.0242  |
| TMEM200B  | 0.691 | 0.1645 | 0.0241  |
| OR4F16    | 0     | 0.1646 | 0.0126  |
| MCM9      | 0.78  | 0.1646 | 0.0192  |
| WDR82     | 0.767 | 0.1646 | 0.0198  |
| SLC25A1P1 | 0     | 0.1647 | 0.032   |
| CELF5     | 0.641 | 0.1648 | 0.0204  |
| ABHD8     | 0.841 | 0.1649 | 0.0265  |
| LAMP5-AS1 | 0.027 | 0.1649 | 0.035   |
| MECR      | 0.82  | 0.1651 | 0.0196  |
| ZNF613    | 0.736 | 0.1652 | 0.0087  |
| RN7SKP293 | 0.245 | 0.1654 | 0.0213  |
| FAM32A    | 0.856 | 0.1654 | 0.0337  |
| THAP11    | 0.804 | 0.1656 | 0.0228  |
| KBTBD6    | 0.816 | 0.1656 | 0.0327  |
| OR7E102P  | 0     | 0.1657 | 0.0211  |
| LINC01381 | 0     | 0.1658 | 0.0299  |
| FBXL17    | 0.792 | 0.1661 | 0.033   |
| RFFL      | 0.814 | 0.1661 | 0.0402  |
| PARD6B    | 0.732 | 0.1662 | 0.0087  |
| DDHD2     | 0.859 | 0.1662 | 0.0343  |
| H1FX      | 0.868 | 0.1662 | 0.0467  |
| UBE2B     | 0.81  | 0.1663 | 0.0208  |
| SPIN1     | 0.804 | 0.1664 | 0.0301  |
| FMN2      | 0.498 | 0.1664 | <0.0001 |
| NODAL     | 0.595 | 0.1665 | 0.0028  |
| DAPL1     | 0.355 | 0.1667 | <0.0001 |
| SLCO5A1   | 0.689 | 0.1669 | 0.0042  |
| KRTAP2-3  | 0.485 | 0.1669 | 0.0068  |
| EXT1      | 0.849 | 0.1669 | 0.0241  |
| PCNT      | 0.864 | 0.1669 | 0.0467  |
| BBS12     | 0.709 | 0.167  | 0.0057  |

|            |       |        |         |
|------------|-------|--------|---------|
| ANKRD36P1  | 0     | 0.167  | 0.02    |
| PPP1R14D   | 0.829 | 0.1671 | 0.0423  |
| CLEC2L     | 0.748 | 0.1673 | 0.0281  |
| MIR3157    | 0.281 | 0.1674 | 0.0198  |
| LINC00589  | 0.33  | 0.1674 | <0.0001 |
| C1GALT1    | 0.813 | 0.1675 | 0.0156  |
| LAD1       | 0.827 | 0.1677 | 0.017   |
| C4BPAP2    | 0.281 | 0.1678 | 0.0291  |
| GTF2A1     | 0.859 | 0.1679 | 0.028   |
| BCL2L1     | 0.863 | 0.1679 | 0.0321  |
| IBA57      | 0.63  | 0.1679 | 0.0361  |
| LOC441601  | 0.749 | 0.168  | 0.0429  |
| ENAM       | 0.764 | 0.1681 | 0.0121  |
| MIR4424    | 0.178 | 0.1681 | 0.0193  |
| ZNF608     | 0.774 | 0.1681 | 0.0273  |
| TOP1       | 0.86  | 0.1681 | 0.0454  |
| KLK4       | 0.832 | 0.1682 | 0.0288  |
| ZNF689     | 0.774 | 0.1683 | 0.0239  |
| MTND1P34   | 0.472 | 0.1683 | 0.0286  |
| BFSP2-AS1  | 0.223 | 0.1684 | 0.0002  |
| ARNT2      | 0.771 | 0.1684 | 0.0056  |
| DNAH8      | 0.702 | 0.1684 | 0.0095  |
| RNU6-1043P | 0     | 0.1684 | 0.0189  |
| ZNF444     | 0.778 | 0.1685 | 0.0132  |
| MED21      | 0.825 | 0.1685 | 0.0498  |
| DYRK1B     | 0.822 | 0.1687 | 0.0163  |
| IREB2      | 0.816 | 0.1687 | 0.0211  |
| GLG1       | 0.864 | 0.1689 | 0.0307  |
| SEMA3A     | 0.847 | 0.1691 | 0.031   |
| ANKRD1     | 0.758 | 0.1692 | 0.0064  |
| RNU6-975P  | 0.18  | 0.1693 | 0.0184  |
| SCRN3      | 0.815 | 0.1694 | 0.022   |
| CAPN13     | 0.675 | 0.1695 | 0.0034  |

|            |       |        |         |
|------------|-------|--------|---------|
| SMIM23     | 0     | 0.1695 | 0.0128  |
| CITED1     | 0.889 | 0.1697 | 0.0428  |
| ZIM2       | 0.72  | 0.1698 | 0.0294  |
| RN7SL305P  | 0     | 0.1699 | 0.018   |
| KRTAP20-2  | 0.471 | 0.17   | <0.0001 |
| CATSPER3   | 0.669 | 0.1701 | 0.0026  |
| FSIP2      | 0.799 | 0.1701 | 0.0243  |
| POMT1      | 0.703 | 0.1702 | 0.0042  |
| STX5       | 0.764 | 0.1702 | 0.0093  |
| RN7SKP87   | 0     | 0.1702 | 0.0165  |
| RNU6-1187P | 0     | 0.1702 | 0.0178  |
| TMEM203    | 0.78  | 0.1702 | 0.0422  |
| ADAM21     | 0.722 | 0.1703 | 0.0064  |
| SALRNA3    | 0     | 0.1703 | 0.0291  |
| DUSP11     | 0.879 | 0.1704 | 0.0428  |
| PHF3       | 0.85  | 0.1705 | 0.0322  |
| RN7SKP230  | 0     | 0.1706 | 0.0175  |
| MC1R       | 0.874 | 0.1706 | 0.0485  |
| NUP62CL    | 0.603 | 0.1707 | 0.0011  |
| AMIGO1     | 0.728 | 0.1708 | 0.0067  |
| KANK2      | 0.755 | 0.1709 | 0.0134  |
| PBX3       | 0.829 | 0.1709 | 0.0247  |
| ANAPC2     | 0.822 | 0.1712 | 0.0162  |
| MIR4735    | 0     | 0.1712 | 0.0171  |
| CLDN7      | 0.767 | 0.1713 | 0.0069  |
| PEX7       | 0.862 | 0.1713 | 0.0378  |
| KCNN4      | 0.866 | 0.1714 | 0.0267  |
| AK7        | 0.459 | 0.1714 | <0.0001 |
| UQCRC1     | 0.825 | 0.1715 | 0.0211  |
| CLIP1      | 0.848 | 0.1715 | 0.0255  |
| CCL11      | 0.846 | 0.1716 | 0.0173  |
| OR56A3     | 0.533 | 0.1717 | 0.0058  |
| CWC15      | 0.851 | 0.1717 | 0.0447  |

|              |       |        |        |
|--------------|-------|--------|--------|
| HTR2C        | 0.847 | 0.172  | 0.022  |
| PLAC1        | 0.665 | 0.1722 | 0.0028 |
| GTF2H5       | 0.847 | 0.1722 | 0.0265 |
| LINC01476    | 0.149 | 0.1722 | 0.0275 |
| MIOX         | 0.807 | 0.1723 | 0.0243 |
| LINC01477    | 0     | 0.1723 | 0.0274 |
| RN7SL69P     | 0.216 | 0.1724 | 0.0164 |
| HSPD1P7      | 0     | 0.1724 | 0.0248 |
| DMBX1        | 0.75  | 0.1725 | 0.0089 |
| NPPB         | 0.858 | 0.1725 | 0.0363 |
| LOC101928222 | 0     | 0.1726 | 0.0017 |
| ZNFX1        | 0.743 | 0.1726 | 0.0124 |
| RIPPLY2      | 0.697 | 0.1728 | 0.0143 |
| CCDC126      | 0.798 | 0.1728 | 0.0177 |
| CDON         | 0.759 | 0.1729 | 0.005  |
| APPBP2       | 0.852 | 0.1729 | 0.0211 |
| LINC00159    | 0.172 | 0.173  | 0.0111 |
| REG4         | 0.714 | 0.1731 | 0.0087 |
| TRAPPC12     | 0.658 | 0.1731 | 0.0421 |
| SYT6         | 0.578 | 0.1732 | 0.0014 |
| ANKMY2       | 0.786 | 0.1734 | 0.0083 |
| PCDHB6       | 0.724 | 0.1735 | 0.0051 |
| NFYB         | 0.869 | 0.1735 | 0.0398 |
| RPS6P20      | 0     | 0.1736 | 0.0239 |
| NFE2L3       | 0.879 | 0.1738 | 0.0489 |
| EFHC2        | 0.663 | 0.1739 | 0.0009 |
| KAZALD1      | 0.84  | 0.174  | 0.0211 |
| MIR486-1     | 0     | 0.174  | 0.0258 |
| CHUK         | 0.87  | 0.174  | 0.035  |
| ATP8B2       | 0.795 | 0.1741 | 0.0089 |
| CELF4        | 0.71  | 0.1741 | 0.0298 |
| RNU6-1149P   | 0     | 0.1742 | 0.0152 |
| BHLHE41      | 0.753 | 0.1743 | 0.0329 |

|              |       |        |         |
|--------------|-------|--------|---------|
| UBE2R2       | 0.681 | 0.1745 | 0.0058  |
| DCC          | 0.848 | 0.1745 | 0.0182  |
| RPL15P18     | 0.288 | 0.1745 | 0.0232  |
| ZNF333       | 0.84  | 0.1746 | 0.0466  |
| SCUBE2       | 0.714 | 0.1747 | 0.003   |
| HMGA2        | 0.834 | 0.1748 | 0.0166  |
| YPEL1        | 0.823 | 0.1748 | 0.0185  |
| LOC102723704 | 0     | 0.1749 | 0.0015  |
| CLDN19       | 0.775 | 0.1749 | 0.0098  |
| RNU6-107P    | 0.204 | 0.1749 | 0.015   |
| ZBTB11       | 0.871 | 0.1749 | 0.0467  |
| RAP1GAP      | 0.882 | 0.1749 | 0.0492  |
| OR7E5P       | 0.37  | 0.1749 | <0.0001 |
| LGI3         | 0.776 | 0.175  | 0.0099  |
| PCDHB17P     | 0.094 | 0.175  | 0.0165  |
| KIZ-AS1      | 0.249 | 0.175  | 0.0251  |
| PDPN         | 0.862 | 0.175  | 0.0336  |
| MOCS1P1      | 0.21  | 0.1751 | 0.0124  |
| CSNK2A2      | 0.831 | 0.1751 | 0.013   |
| KRTAP5-2     | 0.641 | 0.1752 | 0.0028  |
| FRMPD1       | 0.778 | 0.1752 | 0.0058  |
| MIR644A      | 0.231 | 0.1752 | 0.0134  |
| RNU6-696P    | 0     | 0.1752 | 0.0147  |
| C2orf15      | 0.766 | 0.1752 | 0.0148  |
| TNFSF18      | 0.851 | 0.1752 | 0.0336  |
| SIM2         | 0.725 | 0.1753 | 0.0033  |
| GNPDA2       | 0.782 | 0.1753 | 0.0122  |
| ATE1         | 0.839 | 0.1753 | 0.0295  |
| VTRNA1-3     | 0.457 | 0.1754 | 0.0054  |
| C10orf55     | 0.776 | 0.1754 | 0.0228  |
| GLRB         | 0.798 | 0.1755 | 0.0073  |
| LRRC52       | 0.775 | 0.1756 | 0.0147  |
| MAGEA10      | 0.857 | 0.1756 | 0.0205  |

|           |       |        |        |
|-----------|-------|--------|--------|
| CYB561    | 0.792 | 0.1758 | 0.0076 |
| CHRN2     | 0.869 | 0.1758 | 0.034  |
| TMEM35A   | 0     | 0.176  | 0.0176 |
| STX7      | 0.85  | 0.176  | 0.0268 |
| POC1B     | 0.739 | 0.176  | 0.0377 |
| VASP      | 0.873 | 0.176  | 0.0395 |
| ABCB9     | 0.895 | 0.176  | 0.0464 |
| TRAPPC1   | 0.727 | 0.1764 | 0.0136 |
| DTX3L     | 0.803 | 0.1764 | 0.0151 |
| UNC5A     | 0.791 | 0.1764 | 0.0215 |
| RPS23P6   | 0.271 | 0.1764 | 0.0219 |
| ZCCHC12   | 0.555 | 0.1765 | 0.0013 |
| OPA1      | 0.842 | 0.1765 | 0.0273 |
| CPA4      | 0.618 | 0.1766 | 0.0003 |
| RNU6-525P | 0.459 | 0.1766 | 0.014  |
| PRELID3A  | 0     | 0.1767 | 0.0168 |
| DCANP1    | 0.348 | 0.1768 | 0.0131 |
| SF3A3P1   | 0.499 | 0.1769 | 0.0217 |
| RNU6-748P | 0     | 0.1771 | 0.0136 |
| CCDC7     | 0.805 | 0.1772 | 0.0189 |
| ATF1      | 0.846 | 0.1772 | 0.02   |
| PIAS2     | 0.83  | 0.1772 | 0.0222 |
| KLHL18    | 0.735 | 0.1773 | 0.0031 |
| SBF2      | 0.833 | 0.1773 | 0.039  |
| TLE3      | 0.871 | 0.1775 | 0.0361 |
| ESRRA     | 0.844 | 0.1777 | 0.0151 |
| ZNF600    | 0.836 | 0.1777 | 0.0383 |
| NPNT      | 0.749 | 0.1778 | 0.0112 |
| RNU6-917P | 0.459 | 0.1778 | 0.0134 |
| LRCH3     | 0.874 | 0.1778 | 0.0329 |
| VCY       | 0.562 | 0.1778 | 0.0343 |
| TIMM8B    | 0.724 | 0.1779 | 0.0051 |
| TBC1D30   | 0.726 | 0.1779 | 0.0236 |

|             |       |        |         |
|-------------|-------|--------|---------|
| LCMT2       | 0.861 | 0.178  | 0.0257  |
| GPR21       | 0.809 | 0.1781 | 0.0087  |
| FBXO42      | 0.825 | 0.1783 | 0.0125  |
| RHCG        | 0.842 | 0.1783 | 0.021   |
| SNTG1       | 0.712 | 0.1786 | 0.0029  |
| NECAB1      | 0.691 | 0.1786 | 0.0109  |
| GAGE12H     | 0     | 0.1788 | 0.0023  |
| LARGE2      | 0     | 0.179  | 0.0154  |
| OFD1P1Y     | 0     | 0.1792 | 0.0196  |
| SENP7       | 0.883 | 0.1792 | 0.0493  |
| IGFL2       | 0.732 | 0.1794 | 0.0053  |
| POLR1D      | 0.797 | 0.1794 | 0.0127  |
| RAPGEF1     | 0.876 | 0.1794 | 0.0377  |
| LRP2        | 0.788 | 0.1795 | 0.0046  |
| KIAA0930    | 0.609 | 0.1795 | 0.0179  |
| IL17F       | 0.332 | 0.1795 | <0.0001 |
| ITPR3       | 0.841 | 0.1796 | 0.0138  |
| FLYWCH1     | 0.855 | 0.1796 | 0.0315  |
| SETD1A      | 0.853 | 0.1796 | 0.033   |
| CHPT1       | 0.693 | 0.1797 | 0.001   |
| BTF3P10     | 0     | 0.1798 | 0.0071  |
| ACTN1       | 0.779 | 0.1799 | 0.0059  |
| NUP35       | 0.781 | 0.18   | 0.0179  |
| KPNA3       | 0.829 | 0.1803 | 0.0106  |
| KRT8P26     | 0     | 0.1803 | 0.0189  |
| BAG5        | 0.894 | 0.1803 | 0.0378  |
| ATP8B5P     | 0.565 | 0.1803 | 0.0454  |
| ZP1         | 0.644 | 0.1804 | 0.0027  |
| RNU6ATAC30P | 0.216 | 0.1804 | 0.011   |
| LOC441052   | 0.438 | 0.1805 | <0.0001 |
| BEST4       | 0.829 | 0.1806 | 0.0189  |
| DLX4        | 0.901 | 0.1807 | 0.0403  |
| RNU11-3P    | 0     | 0.1808 | 0.0108  |

|            |       |        |         |
|------------|-------|--------|---------|
| RNU6-1324P | 0.205 | 0.1808 | 0.0118  |
| SPR        | 0.832 | 0.1808 | 0.0163  |
| KLHL30     | 0.76  | 0.181  | 0.0133  |
| TMEM8A     | 0.67  | 0.181  | 0.0222  |
| RNU6-667P  | 0.179 | 0.1811 | 0.0117  |
| PML        | 0.865 | 0.1811 | 0.0295  |
| RNU6-731P  | 0.241 | 0.1813 | 0.0116  |
| NUDC       | 0.716 | 0.1814 | 0.0031  |
| EIF2AK2    | 0.893 | 0.1815 | 0.0358  |
| LINC01180  | 0.455 | 0.1815 | <0.0001 |
| LUZP2      | 0.676 | 0.1816 | 0.0009  |
| BTC        | 0.821 | 0.1817 | 0.0081  |
| SSSCA1-AS1 | 0.314 | 0.1818 | 0.0005  |
| KIAA0513   | 0.819 | 0.1818 | 0.0075  |
| PIK3IP1    | 0.879 | 0.1818 | 0.0478  |
| MIR6070    | 0.145 | 0.1821 | 0.0198  |
| DCUN1D2    | 0.895 | 0.1822 | 0.0427  |
| PRR13      | 0.797 | 0.1827 | 0.011   |
| RN7SKP51   | 0     | 0.1828 | 0.0099  |
| RNU6-1203P | 0     | 0.183  | 0.0108  |
| TWF1P1     | 0     | 0.183  | 0.0172  |
| ZNF496     | 0.706 | 0.1831 | 0.0053  |
| MAP3K15    | 0.769 | 0.1833 | 0.0043  |
| NAPG       | 0.833 | 0.1833 | 0.0183  |
| TMEM9B     | 0.834 | 0.1833 | 0.0204  |
| YTHDF2     | 0.842 | 0.1833 | 0.0213  |
| STXBP3     | 0.856 | 0.1833 | 0.0253  |
| LINC01602  | 0     | 0.1834 | 0.0164  |
| LINC01609  | 0     | 0.1834 | 0.0189  |
| FSIP1      | 0.867 | 0.1835 | 0.0334  |
| TXNDC15    | 0.853 | 0.1835 | 0.0355  |
| ZPR1       | 0.58  | 0.1835 | 0.0458  |
| C1GALT1C1  | 0.868 | 0.1836 | 0.0223  |



|              |       |        |        |
|--------------|-------|--------|--------|
| ZNF780A      | 0.852 | 0.1836 | 0.0475 |
| INHA         | 0.619 | 0.1837 | 0.0001 |
| GEMIN8       | 0.787 | 0.1837 | 0.0049 |
| ELMOD2       | 0.816 | 0.1838 | 0.0153 |
| SUMO1        | 0.881 | 0.1838 | 0.0362 |
| ARSG         | 0.596 | 0.1839 | 0.0004 |
| BSND         | 0.676 | 0.1839 | 0.0011 |
| TP53TG3B     | 0.456 | 0.1839 | 0.0202 |
| UBE4A        | 0.882 | 0.184  | 0.0381 |
| AGFG2        | 0.788 | 0.1841 | 0.0172 |
| LSINCT5      | 0     | 0.1841 | 0.0185 |
| HES4         | 0.849 | 0.1841 | 0.0244 |
| LINGO1-AS1   | 0     | 0.1842 | 0.0153 |
| LINC01017    | 0     | 0.1842 | 0.0159 |
| CRISP2       | 0.84  | 0.1843 | 0.0136 |
| ZNF317P1     | 0     | 0.1844 | 0.0163 |
| ERVW-1       | 0.601 | 0.1844 | 0.0388 |
| OSGEP        | 0.784 | 0.1845 | 0.0075 |
| MIR8063      | 0.216 | 0.1845 | 0.0184 |
| PARM1        | 0.789 | 0.1845 | 0.0248 |
| GMPR2        | 0.817 | 0.1846 | 0.008  |
| S100A11P2    | 0     | 0.1847 | 0.0101 |
| SNORA62      | 0.498 | 0.1847 | 0.0115 |
| LOC101928535 | 0     | 0.1849 | 0.0008 |
| MLH3         | 0.864 | 0.1849 | 0.0251 |
| GPC5         | 0.794 | 0.185  | 0.0042 |
| RBM15        | 0.859 | 0.185  | 0.0284 |
| FBXO44       | 0.89  | 0.185  | 0.0498 |
| CHP2         | 0.626 | 0.1852 | 0.0024 |
| NOVA2        | 0.791 | 0.1852 | 0.0084 |
| MDGA2        | 0.742 | 0.1853 | 0.0042 |
| RNY4P7       | 0.387 | 0.1853 | 0.0056 |
| RNU6-1029P   | 0.154 | 0.1853 | 0.01   |

|              |       |        |         |
|--------------|-------|--------|---------|
| TUBA3D       | 0.735 | 0.1854 | 0.0272  |
| FBXW2        | 0.873 | 0.1855 | 0.0257  |
| PTPRJ        | 0.873 | 0.1855 | 0.0353  |
| ACTR1B       | 0.901 | 0.1855 | 0.0385  |
| LRFN5        | 0.509 | 0.1856 | <0.0001 |
| WDR13        | 0.56  | 0.1857 | 0.0002  |
| RNU6-618P    | 0.311 | 0.1857 | 0.0098  |
| FAM114A1     | 0.886 | 0.1857 | 0.0283  |
| RUNDC3A      | 0.741 | 0.1858 | 0.0049  |
| RNU6-790P    | 0     | 0.1859 | 0.0097  |
| LINC01324    | 0     | 0.1859 | 0.015   |
| ANKRD33      | 0.695 | 0.186  | 0.0016  |
| DDIT4L       | 0.678 | 0.1861 | 0.0013  |
| TNKS         | 0.889 | 0.1861 | 0.0469  |
| LOC101927131 | 0     | 0.1863 | 0.0007  |
| LINC01230    | 0     | 0.1863 | 0.0171  |
| EMX1         | 0.874 | 0.1863 | 0.0226  |
| KRT18P49     | 0     | 0.1864 | 0.0092  |
| RNU6-452P    | 0     | 0.1865 | 0.0094  |
| LIPT2        | 0.628 | 0.1865 | 0.0248  |
| GALNT13      | 0.755 | 0.1866 | 0.0041  |
| RNASEH2C     | 0.83  | 0.1866 | 0.0287  |
| DIRC3        | 0.514 | 0.1868 | 0.0044  |
| CREG2        | 0.863 | 0.1868 | 0.0316  |
| VCX2         | 0.676 | 0.187  | 0.0086  |
| GUSBP6       | 0     | 0.1871 | 0.0158  |
| MIR151B      | 0     | 0.1871 | 0.0166  |
| MYOM3        | 0.802 | 0.1872 | 0.0162  |
| MDFI         | 0.874 | 0.1872 | 0.0182  |
| PKD1P1       | 0.447 | 0.1872 | <0.0001 |
| HIST3H3      | 0.806 | 0.1875 | 0.0118  |
| KCTD21       | 0.729 | 0.1876 | 0.0048  |
| CD28         | 0.883 | 0.1876 | 0.0249  |

|              |       |        |         |
|--------------|-------|--------|---------|
| SH3KBP1      | 0.86  | 0.1876 | 0.0404  |
| LINC01229    | 0     | 0.1877 | 0.0162  |
| GAGE2E       | 0     | 0.1877 | <0.0001 |
| UACA         | 0.802 | 0.1878 | 0.0176  |
| CEP63        | 0.774 | 0.1879 | 0.0033  |
| UGT3A2       | 0.556 | 0.188  | 0.0017  |
| VKORC1L1     | 0.769 | 0.188  | 0.0125  |
| LOC401312    | 0.394 | 0.1881 | 0.0004  |
| CCDC40       | 0.745 | 0.1881 | 0.0035  |
| OR52E6       | 0.642 | 0.1881 | 0.0088  |
| PSORS1C1     | 0.831 | 0.1881 | 0.014   |
| ZXDB         | 0.861 | 0.1881 | 0.0343  |
| ABCC1        | 0.836 | 0.1882 | 0.0163  |
| RNA5SP33     | 0.499 | 0.1883 | 0.0049  |
| RNU6-1322P   | 0     | 0.1883 | 0.0088  |
| PGM2L1       | 0.81  | 0.1885 | 0.0198  |
| CPA2         | 0.89  | 0.1885 | 0.0307  |
| IRF6         | 0.831 | 0.1886 | 0.0099  |
| PKDCC        | 0.7   | 0.1886 | 0.0133  |
| FBXL7        | 0.768 | 0.1887 | 0.0025  |
| BIRC3        | 0.854 | 0.1887 | 0.0127  |
| PPIAP24      | 0     | 0.1889 | 0.0085  |
| CCDC85C      | 0.776 | 0.1889 | 0.0263  |
| LMNTD1       | 0.468 | 0.1889 | <0.0001 |
| LOC101929645 | 0     | 0.189  | 0.0006  |
| TMCO2        | 0.562 | 0.189  | 0.0009  |
| C5orf17      | 0.507 | 0.189  | 0.0019  |
| EYA1         | 0.834 | 0.1891 | 0.0077  |
| GAK          | 0.873 | 0.1891 | 0.0185  |
| RDH13        | 0.869 | 0.1891 | 0.0451  |
| SYT1         | 0.838 | 0.1892 | 0.0138  |
| PLS3-AS1     | 0     | 0.1892 | 0.0155  |
| FBXO41       | 0.616 | 0.1893 | 0.0007  |

|            |       |        |         |
|------------|-------|--------|---------|
| RPL4P4     | 0     | 0.1893 | 0.0084  |
| RAD9B      | 0.79  | 0.1893 | 0.0168  |
| WNT3A      | 0.738 | 0.1893 | 0.0204  |
| CADPS2     | 0.774 | 0.1894 | 0.0032  |
| ZNF280A    | 0.486 | 0.1894 | <0.0001 |
| ZNF304     | 0.727 | 0.1896 | 0.0023  |
| RPL30P1    | 0     | 0.1896 | 0.0083  |
| PRR5L      | 0.824 | 0.1896 | 0.0485  |
| MIR563     | 0.088 | 0.1897 | 0.0034  |
| PAF1       | 0.839 | 0.1897 | 0.0169  |
| PIK3C2A    | 0.852 | 0.1899 | 0.0215  |
| ZFP90      | 0.73  | 0.19   | 0.0054  |
| TSPY10     | 0     | 0.1902 | 0.0063  |
| RNU6-466P  | 0     | 0.1903 | 0.0081  |
| ERVMER34-1 | 0.73  | 0.1903 | 0.0465  |
| FAM120C    | 0.533 | 0.1903 | <0.0001 |
| INSC       | 0.699 | 0.1904 | 0.0019  |
| IMPDH1     | 0.815 | 0.1904 | 0.0049  |
| LAIR2      | 0.821 | 0.1905 | 0.0064  |
| TFDP2      | 0.848 | 0.1905 | 0.0157  |
| FBXL16     | 0.821 | 0.1906 | 0.0113  |
| KIAA0319   | 0.735 | 0.1907 | 0.0012  |
| RNU2-35P   | 0     | 0.191  | 0.0079  |
| PLBD1-AS1  | 0.471 | 0.191  | 0.0123  |
| MIR3661    | 0     | 0.1911 | 0.0061  |
| RNU6-237P  | 0.462 | 0.1912 | 0.0078  |
| PYROXD1    | 0.784 | 0.1912 | 0.0177  |
| ATP8A2     | 0.885 | 0.1912 | 0.0218  |
| INPP5E     | 0.914 | 0.1913 | 0.0454  |
| AHNAK2     | 0.737 | 0.1914 | 0.0027  |
| LETM2      | 0.759 | 0.1914 | 0.0057  |
| C20orf194  | 0.817 | 0.1914 | 0.0179  |
| TERF1P5    | 0.184 | 0.1916 | 0.0042  |

|              |       |        |         |
|--------------|-------|--------|---------|
| RNU6-1255P   | 0.072 | 0.1916 | 0.0078  |
| GAGE12C      | 0     | 0.1917 | 0.0001  |
| RN7SL403P    | 0.478 | 0.1917 | 0.0077  |
| METAP1       | 0.869 | 0.1917 | 0.0163  |
| EIF3A        | 0.853 | 0.1917 | 0.018   |
| ETV2         | 0.869 | 0.1917 | 0.0207  |
| MIR4771-2    | 0.266 | 0.1918 | 0.0126  |
| PKIB         | 0.75  | 0.1919 | 0.0064  |
| TRIM36       | 0.646 | 0.192  | 0.0005  |
| SH3GL1       | 0.805 | 0.192  | 0.0067  |
| LINC00534    | 0.245 | 0.192  | 0.0076  |
| RPL21P110    | 0     | 0.192  | 0.0124  |
| MAP4K5       | 0.887 | 0.192  | 0.0226  |
| OPA3         | 0.876 | 0.192  | 0.0315  |
| HOXC10       | 0.595 | 0.192  | <0.0001 |
| LSM10        | 0.641 | 0.1921 | 0.001   |
| RNA5SP466    | 0     | 0.1921 | 0.0041  |
| KRT18P44     | 0.377 | 0.1921 | 0.0078  |
| GAPDHP37     | 0     | 0.1921 | 0.0124  |
| FBXO22       | 0.809 | 0.1922 | 0.0055  |
| CAMK2N1      | 0.801 | 0.1922 | 0.0056  |
| RPL36P18     | 0     | 0.1922 | 0.0074  |
| LOC101928697 | 0     | 0.1923 | 0.0002  |
| LOC101928622 | 0.345 | 0.1923 | 0.0005  |
| IGLJCOR18    | 0.28  | 0.1923 | 0.0075  |
| GAGE2B       | 0.448 | 0.1924 | 0.0007  |
| LINC01203    | 0     | 0.1924 | 0.0097  |
| GABRG2       | 0.873 | 0.1925 | 0.018   |
| RSBN1L       | 0.813 | 0.1925 | 0.0191  |
| ZIK1         | 0.726 | 0.1926 | 0.0064  |
| HS6ST1       | 0.807 | 0.1926 | 0.0078  |
| CDKL3        | 0.899 | 0.1926 | 0.0355  |
| PRKD3        | 0.852 | 0.1928 | 0.0167  |

|           |       |        |        |
|-----------|-------|--------|--------|
| CNIH3     | 0.803 | 0.1929 | 0.0041 |
| PNMA3     | 0.836 | 0.1929 | 0.0129 |
| PPIP5K2   | 0.831 | 0.1929 | 0.0465 |
| AHRR      | 0.769 | 0.193  | 0.005  |
| TOP3A     | 0.85  | 0.1931 | 0.0157 |
| CHIT1     | 0.836 | 0.1932 | 0.0153 |
| RNU7-200P | 0     | 0.1933 | 0.0133 |
| ADGRF4    | 0.461 | 0.1934 | 0.0095 |
| TNFRSF19  | 0.838 | 0.1936 | 0.0245 |
| SLC30A2   | 0.698 | 0.1937 | 0.0025 |
| RNU6-824P | 0     | 0.1937 | 0.0071 |
| UBTD1     | 0.854 | 0.1937 | 0.0196 |
| SMCR8     | 0.821 | 0.1938 | 0.019  |
| MIR548N   | 0     | 0.1939 | 0.0055 |
| ZNF614    | 0.742 | 0.194  | 0.0025 |
| FAM122C   | 0.828 | 0.1941 | 0.0108 |
| PTPRD-AS2 | 0     | 0.1941 | 0.013  |
| NPAT      | 0.788 | 0.1942 | 0.0055 |
| RDH10     | 0.617 | 0.1943 | 0.0008 |
| CRYBB2    | 0.826 | 0.1943 | 0.0062 |
| ANKRA2    | 0.837 | 0.1943 | 0.0087 |
| TSSC4     | 0.867 | 0.1946 | 0.0255 |
| MVB12B    | 0.644 | 0.1947 | 0.0295 |
| FZR1      | 0.888 | 0.1949 | 0.0217 |
| LINC01228 | 0     | 0.195  | 0.0126 |
| SYNGR4    | 0.874 | 0.195  | 0.0221 |
| POLR2KP1  | 0     | 0.1951 | 0.0111 |
| RNF38     | 0.792 | 0.1952 | 0.0054 |
| CRLF1     | 0.874 | 0.1952 | 0.0148 |
| PLEKHG4   | 0.838 | 0.1952 | 0.0325 |
| HIPK1     | 0.871 | 0.1953 | 0.0165 |
| AAMP      | 0.882 | 0.1953 | 0.0192 |
| SURF2     | 0.853 | 0.1953 | 0.0194 |

|           |       |        |         |
|-----------|-------|--------|---------|
| CHAC2     | 0.617 | 0.1954 | 0.0003  |
| CT45A3    | 0     | 0.1955 | 0.0014  |
| VSTM5     | 0.463 | 0.1956 | 0.001   |
| LPAR4     | 0.806 | 0.1956 | 0.0093  |
| ALDOAP1   | 0     | 0.1956 | 0.0109  |
| BEND7     | 0.804 | 0.1957 | 0.0171  |
| MRPL23    | 0.788 | 0.196  | 0.0059  |
| HTRA4     | 0.841 | 0.196  | 0.0139  |
| ANKRD13A  | 0.889 | 0.196  | 0.0379  |
| FAM71F2   | 0.658 | 0.1961 | 0.0013  |
| RN7SL547P | 0     | 0.1961 | 0.0063  |
| DHRS7     | 0.824 | 0.1962 | 0.0057  |
| RNU1-136P | 0.253 | 0.1962 | 0.0063  |
| TIMM23    | 0.87  | 0.1962 | 0.047   |
| RN7SKP255 | 0     | 0.1963 | 0.0056  |
| TOM1      | 0.862 | 0.1965 | 0.0178  |
| EEF2      | 0.891 | 0.1965 | 0.0224  |
| CHST13    | 0.862 | 0.1967 | 0.0211  |
| COPS2     | 0.91  | 0.1967 | 0.0359  |
| NDUFS3    | 0.781 | 0.1968 | 0.0044  |
| RNASEH2B  | 0.887 | 0.1968 | 0.0355  |
| SYT11     | 0.809 | 0.1969 | 0.0061  |
| RN7SKP117 | 0.467 | 0.197  | 0.0061  |
| ANXA5     | 0.869 | 0.1971 | 0.0126  |
| KCTD13    | 0.784 | 0.1973 | 0.0037  |
| RPL29P19  | 0.484 | 0.1973 | 0.0104  |
| CSDE1     | 0.85  | 0.1973 | 0.0113  |
| FOXQ1     | 0.45  | 0.1973 | <0.0001 |
| RNU5D-1   | 0.26  | 0.1974 | 0.0032  |
| HMGB3P5   | 0     | 0.1974 | 0.0103  |
| MIR4472-2 | 0.141 | 0.1977 | 0.0066  |
| MIR6877   | 0     | 0.1977 | 0.0115  |
| PPIL3     | 0.805 | 0.1977 | 0.0165  |

|              |       |        |         |
|--------------|-------|--------|---------|
| FBXO36-IT1   | 0     | 0.198  | 0.0058  |
| HOXC13-AS    | 0.424 | 0.1982 | 0.0113  |
| NDUFA11      | 0.884 | 0.1982 | 0.049   |
| SLC24A5      | 0.537 | 0.1983 | 0.0031  |
| KIF1B        | 0.878 | 0.1983 | 0.0179  |
| TRBV7-7      | 0.128 | 0.1984 | 0.0055  |
| RNU6-969P    | 0     | 0.1984 | 0.0057  |
| MIR4762      | 0     | 0.1984 | 0.0058  |
| GCNT4        | 0.885 | 0.1984 | 0.0275  |
| SNORD114-13  | 0     | 0.1985 | 0.0013  |
| LRRCC1       | 0.794 | 0.1985 | 0.0063  |
| KIF16B       | 0.815 | 0.1985 | 0.0115  |
| ZNF281       | 0.874 | 0.1985 | 0.0257  |
| CYP4F30P     | 0.547 | 0.1986 | 0.0223  |
| SLC37A3      | 0.856 | 0.1986 | 0.0278  |
| LINC00884    | 0.304 | 0.1986 | <0.0001 |
| ADGRL3       | 0.458 | 0.1988 | 0.0076  |
| TAF3         | 0.778 | 0.199  | 0.01    |
| FZD2         | 0.876 | 0.199  | 0.0132  |
| C2orf91      | 0     | 0.1996 | 0.0011  |
| DACH2        | 0.758 | 0.1996 | 0.0028  |
| TNNT1        | 0.753 | 0.1997 | 0.0017  |
| RRAS         | 0.785 | 0.1999 | 0.0031  |
| OR52N5       | 0.538 | 0.2001 | 0.0015  |
| MCOLN1       | 0.815 | 0.2001 | 0.0041  |
| SNAP25       | 0.831 | 0.2001 | 0.0078  |
| RNU6-433P    | 0     | 0.2002 | 0.0054  |
| PANK2        | 0.885 | 0.2002 | 0.0307  |
| SNX3         | 0.788 | 0.2003 | 0.0047  |
| MMP24        | 0.866 | 0.2004 | 0.0189  |
| LOC101926915 | 0     | 0.2005 | 0.0003  |
| FBN1         | 0.815 | 0.2006 | 0.0033  |
| SBK1         | 0.832 | 0.2009 | 0.0209  |



|              |       |        |         |
|--------------|-------|--------|---------|
| CCDC184      | 0.472 | 0.2009 | <0.0001 |
| RANBP17      | 0.7   | 0.201  | 0.0008  |
| HOXA11       | 0.744 | 0.201  | 0.001   |
| RN7SKP276    | 0     | 0.2011 | 0.0046  |
| EBAG9        | 0.821 | 0.2012 | 0.0042  |
| MAP3K10      | 0.883 | 0.2013 | 0.0164  |
| RNU5E-10P    | 0.167 | 0.2014 | 0.0021  |
| TRBV7-1      | 0.151 | 0.2014 | 0.0048  |
| TMX1         | 0.786 | 0.2014 | 0.017   |
| ACE          | 0.92  | 0.2015 | 0.0418  |
| RTN4RL1      | 0.387 | 0.2015 | <0.0001 |
| EHD2         | 0.67  | 0.2016 | 0.0002  |
| TBC1D17      | 0.885 | 0.2016 | 0.0306  |
| ZNF486       | 0.869 | 0.2016 | 0.046   |
| ZNF221       | 0.799 | 0.2017 | 0.0049  |
| USP7         | 0.881 | 0.2018 | 0.0239  |
| SLC30A8      | 0.374 | 0.2018 | <0.0001 |
| POLR3E       | 0.754 | 0.2019 | 0.0038  |
| FAM197Y9     | 0     | 0.2019 | 0.0055  |
| PANX2        | 0.775 | 0.2019 | 0.0061  |
| DLX6         | 0.747 | 0.202  | 0.001   |
| LOC339862    | 0     | 0.202  | <0.0001 |
| CENPV        | 0.45  | 0.202  | <0.0001 |
| CNTROB       | 0.849 | 0.2022 | 0.0132  |
| RPL41        | 0.86  | 0.2022 | 0.0203  |
| VTRNA2-2P    | 0     | 0.2023 | 0.0096  |
| DYRK3        | 0.805 | 0.2024 | 0.0028  |
| SLC6A3       | 0.869 | 0.2024 | 0.0165  |
| LOC101928748 | 0     | 0.2025 | 0.0002  |
| ARHGAP17     | 0.813 | 0.2025 | 0.0037  |
| RNU4-90P     | 0     | 0.2026 | 0.0048  |
| ACTN3        | 0.81  | 0.2027 | 0.0041  |
| MIR1972-2    | 0.331 | 0.2027 | 0.0048  |

|           |       |        |         |
|-----------|-------|--------|---------|
| UGT2A3P7  | 0     | 0.2027 | 0.0084  |
| C1orf189  | 0.744 | 0.2028 | 0.0091  |
| MIR942    | 0.267 | 0.2029 | 0.0017  |
| DTX2      | 0.85  | 0.2029 | 0.0186  |
| RNU6-967P | 0     | 0.203  | 0.0047  |
| FAM227A   | 0.393 | 0.2031 | 0.0005  |
| ZNF804A   | 0.494 | 0.2031 | <0.0001 |
| FIS1      | 0.628 | 0.2031 | <0.0001 |
| SLC30A10  | 0.823 | 0.2033 | 0.008   |
| IFFO1     | 0.885 | 0.2034 | 0.0419  |
| TNNC2     | 0.843 | 0.2036 | 0.0081  |
| RRAGB     | 0.859 | 0.2036 | 0.0124  |
| SNRPGP5   | 0     | 0.2037 | 0.0081  |
| CDH9      | 0.779 | 0.2038 | 0.0016  |
| TRIM62    | 0.83  | 0.2038 | 0.0083  |
| PEX10     | 0.872 | 0.2038 | 0.023   |
| PPP1R11P1 | 0     | 0.2039 | 0.0023  |
| RNU6-770P | 0     | 0.2039 | 0.0046  |
| MRLN      | 0.495 | 0.204  | 0.0077  |
| FOXG1-AS1 | 0     | 0.204  | 0.009   |
| CIR1      | 0.802 | 0.2041 | 0.0099  |
| DCLK3     | 0.891 | 0.2041 | 0.0412  |
| RFXAP     | 0.914 | 0.2041 | 0.0477  |
| ZNF711    | 0.753 | 0.2042 | 0.0014  |
| PRRG3     | 0.906 | 0.2042 | 0.0453  |
| RNU6-167P | 0     | 0.2043 | 0.0045  |
| ZNF32     | 0.849 | 0.2043 | 0.0121  |
| PRICKLE3  | 0.865 | 0.2043 | 0.0232  |
| CASC4P1   | 0     | 0.2048 | 0.0077  |
| DISP1     | 0.897 | 0.2048 | 0.0388  |
| MIR3667   | 0     | 0.2049 | 0.0069  |
| CRELD1    | 0.867 | 0.2049 | 0.0093  |
| ZNF208    | 0.445 | 0.2049 | <0.0001 |

|            |       |        |         |
|------------|-------|--------|---------|
| ATP11AUN   | 0     | 0.205  | 0.0022  |
| CTDP1      | 0.805 | 0.205  | 0.0025  |
| ZDHHC18    | 0.864 | 0.205  | 0.0165  |
| MDGA1      | 0.711 | 0.2051 | 0.0007  |
| FN3K       | 0.827 | 0.2051 | 0.0042  |
| TBK1       | 0.842 | 0.2051 | 0.0106  |
| BAG3       | 0.908 | 0.2051 | 0.0324  |
| CYCSP51    | 0     | 0.2052 | 0.0043  |
| HOXB13     | 0.836 | 0.2052 | 0.0045  |
| GAGE1      | 0.873 | 0.2052 | 0.0307  |
| LOC646522  | 0.08  | 0.2053 | 0.0002  |
| GPR88      | 0.709 | 0.2053 | 0.0003  |
| RNU6-834P  | 0     | 0.2054 | 0.0043  |
| REC114     | 0.315 | 0.2054 | <0.0001 |
| ARL8A      | 0.753 | 0.2056 | 0.0018  |
| AMZ2P1     | 0.549 | 0.2056 | 0.0173  |
| MIR3146    | 0     | 0.2057 | 0.0033  |
| DUX4L9     | 0.468 | 0.2057 | 0.0061  |
| RBM20      | 0.596 | 0.206  | 0.0005  |
| CAPN9      | 0.832 | 0.206  | 0.0048  |
| RHBG       | 0.765 | 0.2062 | 0.0021  |
| EIF4E2     | 0.826 | 0.2062 | 0.0039  |
| EFHD2      | 0.756 | 0.2064 | 0.0008  |
| ZNF320     | 0.766 | 0.2064 | 0.0058  |
| EMCN       | 0.899 | 0.2064 | 0.0238  |
| RNU6-1128P | 0     | 0.2066 | 0.004   |
| OSBPL2     | 0.81  | 0.2066 | 0.0046  |
| PSCA       | 0.855 | 0.2066 | 0.0099  |
| TRMT2B-AS1 | 0     | 0.2067 | 0.0032  |
| ZNF547     | 0.759 | 0.2067 | 0.0049  |
| DNAJC24    | 0.778 | 0.2067 | 0.006   |
| TMEM40     | 0.681 | 0.2068 | 0.0003  |
| PAGE5      | 0.754 | 0.2069 | 0.0033  |

|               |       |        |        |
|---------------|-------|--------|--------|
| CDH17         | 0.838 | 0.2069 | 0.004  |
| TMEM163       | 0.805 | 0.2069 | 0.006  |
| GZF1          | 0.851 | 0.207  | 0.0122 |
| DKFZP586I1420 | 0.807 | 0.207  | 0.0389 |
| MAP3K1        | 0.853 | 0.2071 | 0.0088 |
| ZNF491        | 0.863 | 0.2071 | 0.0252 |
| ORAI1         | 0.809 | 0.2072 | 0.0153 |
| MED9          | 0.843 | 0.2073 | 0.0045 |
| FGFR3P6       | 0     | 0.2073 | 0.007  |
| ZNF529        | 0.855 | 0.2074 | 0.0144 |
| LOC101929229  | 0     | 0.2075 | 0.0002 |
| BSN           | 0.858 | 0.2075 | 0.0087 |
| RBP2          | 0.751 | 0.2076 | 0.0041 |
| DNASE2        | 0.895 | 0.2076 | 0.0183 |
| BCL10         | 0.868 | 0.2077 | 0.0113 |
| SNN           | 0.889 | 0.2077 | 0.0359 |
| SALL4         | 0.901 | 0.2077 | 0.0428 |
| FOXC1         | 0.875 | 0.2078 | 0.0126 |
| RNU7-63P      | 0.274 | 0.2081 | 0.0034 |
| CCDC81        | 0.752 | 0.2082 | 0.0006 |
| PSKH1         | 0.894 | 0.2082 | 0.0299 |
| ZNF75A        | 0.768 | 0.2083 | 0.0047 |
| PRPS1         | 0.919 | 0.2084 | 0.0489 |
| SNPH          | 0.87  | 0.2085 | 0.0147 |
| CCL26         | 0.746 | 0.2086 | 0.0013 |
| AXIN2         | 0.75  | 0.2086 | 0.0015 |
| RN7SKP98      | 0     | 0.2086 | 0.0037 |
| LINC01193     | 0.472 | 0.2086 | 0.0052 |
| RNU4-57P      | 0     | 0.2086 | 0.0076 |
| FRA10AC1      | 0.635 | 0.2086 | 0.0088 |
| KLC3          | 0.866 | 0.2086 | 0.0148 |
| DHPS          | 0.894 | 0.2086 | 0.0159 |
| DYDC1         | 0.858 | 0.2086 | 0.0163 |

|            |       |        |         |
|------------|-------|--------|---------|
| CTAG1A     | 0.499 | 0.2086 | <0.0001 |
| ACTR3B     | 0.859 | 0.2087 | 0.0112  |
| C1orf174   | 0.85  | 0.2088 | 0.0114  |
| RCOR2      | 0.793 | 0.2091 | 0.006   |
| IRAK1BP1   | 0.859 | 0.2091 | 0.0176  |
| SCN8A      | 0.878 | 0.2091 | 0.0191  |
| CHID1      | 0.666 | 0.2092 | 0.0002  |
| FOXA1      | 0.837 | 0.2092 | 0.0037  |
| BRD7       | 0.9   | 0.2092 | 0.0245  |
| AGPAT5     | 0.67  | 0.2093 | 0.0001  |
| C1orf61    | 0.909 | 0.2093 | 0.033   |
| GYS1       | 0.87  | 0.2094 | 0.0081  |
| EPHX1      | 0.889 | 0.2095 | 0.0207  |
| MYBPC1     | 0.893 | 0.2096 | 0.0242  |
| C1QTNF6    | 0.895 | 0.2096 | 0.0338  |
| PRKD1      | 0.735 | 0.2097 | 0.0007  |
| RNU6-540P  | 0.051 | 0.2097 | 0.0036  |
| PTPRR      | 0.859 | 0.2098 | 0.0102  |
| TRNT1      | 0.828 | 0.2098 | 0.0131  |
| ETV5       | 0.884 | 0.2099 | 0.0152  |
| SNX21      | 0.835 | 0.21   | 0.0139  |
| MSC        | 0.544 | 0.2101 | <0.0001 |
| PFKM       | 0.749 | 0.2102 | 0.0008  |
| MGAT2      | 0.878 | 0.2102 | 0.0104  |
| ST6GALNAC4 | 0.829 | 0.2103 | 0.0057  |
| CERS3-AS1  | 0     | 0.2103 | 0.0071  |
| ZNF229     | 0.6   | 0.2104 | 0.0006  |
| LOH12CR2   | 0.751 | 0.2104 | 0.0148  |
| GCC1       | 0.759 | 0.2105 | 0.0007  |
| GJA10      | 0.808 | 0.2105 | 0.0033  |
| COL9A2     | 0.843 | 0.2105 | 0.0038  |
| PPP4R2     | 0.807 | 0.2107 | 0.0042  |
| SH3BGRL3   | 0.863 | 0.2108 | 0.0133  |

|           |       |        |         |
|-----------|-------|--------|---------|
| UBE2U     | 0.63  | 0.2109 | 0.0004  |
| FOXD4L1   | 0.737 | 0.2109 | 0.0057  |
| IRS1      | 0.861 | 0.2109 | 0.0061  |
| SPECC1    | 0.788 | 0.2109 | 0.0152  |
| MIR608    | 0.485 | 0.211  | 0.0009  |
| FOXJ1     | 0.817 | 0.2112 | 0.0016  |
| SYNGR3    | 0.829 | 0.2113 | 0.0046  |
| DSTN      | 0.85  | 0.2114 | 0.0047  |
| NMI       | 0.866 | 0.2115 | 0.0117  |
| SENP2     | 0.768 | 0.2116 | 0.0018  |
| ATP11A    | 0.775 | 0.2117 | 0.0011  |
| RALGPS1   | 0.78  | 0.2117 | 0.002   |
| SNX2      | 0.911 | 0.2117 | 0.0377  |
| HSD17B1   | 0.875 | 0.2118 | 0.0085  |
| RARA      | 0.863 | 0.212  | 0.0103  |
| FKBP10    | 0.597 | 0.212  | <0.0001 |
| NDUFS5    | 0.892 | 0.2121 | 0.042   |
| LOC390705 | 0.744 | 0.2121 | 0.0428  |
| DGKD      | 0.901 | 0.2122 | 0.0177  |
| SRRM3     | 0.824 | 0.2122 | 0.0302  |
| RNA5SP101 | 0     | 0.2125 | 0.0015  |
| TMEM216   | 0.624 | 0.2126 | 0.0018  |
| CDH8      | 0.917 | 0.2126 | 0.0298  |
| GACAT2    | 0     | 0.2127 | 0.0066  |
| RNU7-50P  | 0     | 0.2128 | 0.0035  |
| TUBGCP2   | 0.794 | 0.213  | 0.0028  |
| PCYOX1L   | 0.829 | 0.2131 | 0.0054  |
| MIR6815   | 0     | 0.2131 | 0.0064  |
| SLC35F5   | 0.802 | 0.2133 | 0.0032  |
| AFF3      | 0.836 | 0.2135 | 0.0038  |
| RGL2      | 0.852 | 0.2136 | 0.0088  |
| CAPN12    | 0.893 | 0.2136 | 0.0263  |
| C9orf57   | 0.757 | 0.2138 | 0.0026  |

|              |       |        |        |
|--------------|-------|--------|--------|
| TMEM126B     | 0.832 | 0.2138 | 0.006  |
| AIP          | 0.868 | 0.2138 | 0.0067 |
| GAR1         | 0.861 | 0.2138 | 0.0203 |
| LOC101928371 | 0.156 | 0.214  | 0.0001 |
| SLC47A2      | 0.779 | 0.214  | 0.0039 |
| RPL37P1      | 0     | 0.214  | 0.0054 |
| MIR5192      | 0     | 0.2141 | 0.0062 |
| LAMP2        | 0.918 | 0.2142 | 0.03   |
| ETV1         | 0.81  | 0.2143 | 0.0014 |
| PPDPF        | 0.669 | 0.2143 | 0.0017 |
| LINC01050    | 0     | 0.2144 | 0.0061 |
| CCL8         | 0.888 | 0.2145 | 0.0114 |
| TRAK1        | 0.892 | 0.2145 | 0.0207 |
| DDIT4        | 0.817 | 0.2146 | 0.0016 |
| GDI2         | 0.907 | 0.2146 | 0.0212 |
| C5orf15      | 0.84  | 0.2147 | 0.004  |
| EIF4A1P2     | 0.309 | 0.2148 | 0.0013 |
| POLL         | 0.828 | 0.2148 | 0.005  |
| CNTD1        | 0.874 | 0.2148 | 0.0146 |
| SNORD114-28  | 0.455 | 0.2149 | 0.002  |
| RNU4-25P     | 0.468 | 0.2149 | 0.0025 |
| CCNG1        | 0.869 | 0.2149 | 0.0066 |
| HAUS8        | 0.789 | 0.2149 | 0.0078 |
| BTBD8        | 0.858 | 0.2149 | 0.0113 |
| HPCAL1       | 0.897 | 0.2149 | 0.016  |
| CATSPER1     | 0.762 | 0.215  | 0.0013 |
| CINP         | 0.855 | 0.2152 | 0.0112 |
| ZNF624       | 0.856 | 0.2152 | 0.0258 |
| GDE1         | 0.678 | 0.2153 | 0.0004 |
| SPEF2        | 0.821 | 0.2153 | 0.0088 |
| KLHDC8A      | 0.771 | 0.2154 | 0.0011 |
| EPHB4        | 0.849 | 0.2154 | 0.0037 |
| TPRXL        | 0.654 | 0.2155 | 0.0011 |

|              |       |        |         |
|--------------|-------|--------|---------|
| C6orf223     | 0.766 | 0.2155 | 0.0072  |
| ZNF225       | 0.81  | 0.2156 | 0.0047  |
| LOC101929224 | 0     | 0.2157 | <0.0001 |
| USE1         | 0.813 | 0.2158 | 0.0056  |
| ANGEL1       | 0.917 | 0.2158 | 0.0313  |
| RNU6-665P    | 0     | 0.2159 | 0.0027  |
| ARHGAP35     | 0.77  | 0.216  | 0.0333  |
| RNU6-1311P   | 0     | 0.2161 | 0.0026  |
| POTEG        | 0.441 | 0.2161 | <0.0001 |
| CNMD         | 0     | 0.2162 | 0.0043  |
| MIR5094      | 0     | 0.2162 | 0.0043  |
| H3F3B        | 0.801 | 0.2162 | 0.0058  |
| RNF139       | 0.809 | 0.2163 | 0.0032  |
| MAGEE1       | 0.873 | 0.2163 | 0.0141  |
| ZNF845       | 0.808 | 0.2163 | 0.0481  |
| PITPNC1      | 0.716 | 0.2164 | 0.0004  |
| GUCY1B2      | 0.709 | 0.2164 | 0.001   |
| LPIN1        | 0.899 | 0.2164 | 0.0142  |
| TNFRSF18     | 0.881 | 0.2164 | 0.0267  |
| SNORA73A     | 0     | 0.2164 | 0.0279  |
| GSTO2        | 0.808 | 0.2165 | 0.003   |
| CLEC16A      | 0.911 | 0.2165 | 0.036   |
| DENND2C      | 0.901 | 0.2166 | 0.033   |
| AKAP14       | 0.758 | 0.2167 | 0.0011  |
| ADGRF1       | 0.008 | 0.2167 | 0.003   |
| RPS26P34     | 0     | 0.2167 | 0.0048  |
| FRS2         | 0.865 | 0.2167 | 0.0071  |
| SHC4         | 0.107 | 0.2167 | <0.0001 |
| PPP2R5E      | 0.892 | 0.2168 | 0.0194  |
| SPG11        | 0.875 | 0.2169 | 0.0166  |
| UBE2J2       | 0.841 | 0.217  | 0.0124  |
| SEMA6C       | 0.885 | 0.217  | 0.0178  |
| HRH1         | 0.921 | 0.217  | 0.0292  |



|              |       |        |         |
|--------------|-------|--------|---------|
| SPATA17-AS1  | 0     | 0.2171 | 0.0055  |
| UPRT         | 0.849 | 0.2171 | 0.0148  |
| TKTL1        | 0.748 | 0.2172 | 0.0005  |
| RTN1         | 0.829 | 0.2172 | 0.0038  |
| RSAD1        | 0.831 | 0.2172 | 0.0052  |
| FDXACB1      | 0.844 | 0.2172 | 0.0249  |
| RUFY2        | 0.897 | 0.2172 | 0.0278  |
| LOC101929384 | 0     | 0.2172 | <0.0001 |
| RPL31P2      | 0     | 0.2173 | 0.0047  |
| PGF          | 0.883 | 0.2173 | 0.0132  |
| LYPD6        | 0.534 | 0.2173 | <0.0001 |
| VAPB         | 0.854 | 0.2176 | 0.009   |
| MEIS1        | 0.917 | 0.2178 | 0.0252  |
| BTN2A3P      | 0.766 | 0.2179 | 0.0455  |
| ASTN2        | 0.802 | 0.218  | 0.0012  |
| UCN2         | 0.777 | 0.2181 | 0.004   |
| NCS1         | 0.8   | 0.2182 | 0.0148  |
| ARPC5L       | 0.889 | 0.2183 | 0.0177  |
| PMS1         | 0.879 | 0.2184 | 0.0159  |
| OR10D3       | 0.601 | 0.2184 | 0.0199  |
| PWRN4        | 0.417 | 0.2185 | 0.0053  |
| POTED        | 0.346 | 0.2186 | <0.0001 |
| TMEM135      | 0.788 | 0.2187 | 0.0018  |
| MAPK7        | 0.855 | 0.2187 | 0.0038  |
| LINCMD1      | 0     | 0.2188 | 0.0052  |
| UVRAG        | 0.86  | 0.2189 | 0.0079  |
| CDKL5        | 0.885 | 0.2189 | 0.0098  |
| YPEL5        | 0.849 | 0.2191 | 0.0079  |
| RNU2-40P     | 0     | 0.2192 | 0.0023  |
| DLK2         | 0.868 | 0.2192 | 0.0083  |
| POLR3H       | 0.782 | 0.2194 | 0.0038  |
| ZNF510       | 0.855 | 0.2195 | 0.0085  |
| CHST6        | 0.796 | 0.2196 | 0.0022  |

|            |       |        |         |
|------------|-------|--------|---------|
| PSPC1      | 0.822 | 0.2196 | 0.0043  |
| FAM215A    | 0.654 | 0.2196 | 0.017   |
| TRIM55     | 0.872 | 0.2196 | 0.0217  |
| DCST2      | 0.818 | 0.2197 | 0.0059  |
| TIMM21     | 0.749 | 0.2199 | 0.0421  |
| ZNF610     | 0.772 | 0.22   | 0.0029  |
| CBX6       | 0.801 | 0.2201 | 0.0008  |
| MED28      | 0.833 | 0.2201 | 0.0027  |
| DENND1B    | 0.788 | 0.2202 | 0.0019  |
| PRR14      | 0.874 | 0.2204 | 0.0141  |
| PI4KA      | 0.815 | 0.2204 | 0.0218  |
| LTV1       | 0.903 | 0.2206 | 0.031   |
| SPIN2B     | 0.805 | 0.2207 | 0.0442  |
| SCP2D1     | 0.189 | 0.2207 | <0.0001 |
| ACVRL1     | 0.923 | 0.2208 | 0.0307  |
| RN7SKP114  | 0     | 0.2209 | 0.0021  |
| VLDLR      | 0.823 | 0.2209 | 0.0028  |
| ARRDC2     | 0.856 | 0.2209 | 0.0081  |
| LNPEP      | 0.874 | 0.221  | 0.0057  |
| BMP2       | 0.867 | 0.2211 | 0.0049  |
| CLOCK      | 0.895 | 0.2211 | 0.0116  |
| RN7SL170P  | 0     | 0.2212 | 0.0021  |
| ZNF180     | 0.807 | 0.2212 | 0.0027  |
| SLC12A1    | 0.832 | 0.2212 | 0.0032  |
| MBTPS2     | 0.845 | 0.2212 | 0.0037  |
| IGFBPL1    | 0.749 | 0.2213 | 0.0011  |
| SPTA1      | 0.862 | 0.2213 | 0.0068  |
| SNORD35A   | 0.512 | 0.2214 | 0.0324  |
| GALNT5     | 0.697 | 0.2215 | 0.0002  |
| RNU6-1305P | 0     | 0.2215 | 0.0021  |
| FLII       | 0.843 | 0.2215 | 0.0023  |
| WIF1       | 0.463 | 0.2215 | <0.0001 |
| SNORD1A    | 0.439 | 0.2216 | 0.0089  |

|             |       |        |         |
|-------------|-------|--------|---------|
| TSPY3       | 0.28  | 0.2217 | 0.0003  |
| GNAI3       | 0.931 | 0.2217 | 0.0417  |
| TRIOBP      | 0.923 | 0.2217 | 0.0459  |
| DNAL1       | 0.77  | 0.2218 | 0.0011  |
| CT47A11     | 0.24  | 0.2218 | 0.0036  |
| PARP10      | 0.853 | 0.2218 | 0.0137  |
| OXCT1       | 0.804 | 0.2219 | 0.0015  |
| LINC01288   | 0.039 | 0.2219 | 0.0038  |
| TUBGCP5     | 0.806 | 0.2219 | 0.004   |
| RN7SKP214   | 0     | 0.2221 | 0.002   |
| HNRNPF      | 0.783 | 0.2221 | 0.0023  |
| PLEKHG6     | 0.852 | 0.2222 | 0.0084  |
| MYLK2       | 0.867 | 0.2222 | 0.0142  |
| RHOG        | 0.891 | 0.2222 | 0.016   |
| COL4A5      | 0.838 | 0.2223 | 0.0021  |
| TSNARE1     | 0.802 | 0.2223 | 0.0045  |
| PNMA5       | 0.404 | 0.2224 | <0.0001 |
| PHF13       | 0.733 | 0.2225 | 0.0012  |
| SH2B2       | 0.873 | 0.2225 | 0.01    |
| SPTLC2      | 0.899 | 0.2225 | 0.0191  |
| RPL26P35    | 0     | 0.2226 | 0.0038  |
| ZNF292      | 0.92  | 0.2226 | 0.0452  |
| BCAR3       | 0.766 | 0.2227 | 0.0002  |
| RNU6ATAC27P | 0     | 0.2227 | 0.0044  |
| RGS20       | 0.765 | 0.2228 | 0.001   |
| MPHOSPH6    | 0.849 | 0.2228 | 0.0047  |
| LINC01499   | 0     | 0.2229 | 0.0044  |
| KRIT1       | 0.917 | 0.2229 | 0.0228  |
| FAM135A     | 0.829 | 0.223  | 0.003   |
| RAET1E      | 0.793 | 0.223  | 0.0036  |
| CCNYL1      | 0.826 | 0.223  | 0.0039  |
| TP53I11     | 0.87  | 0.223  | 0.0084  |
| RTP4        | 0.867 | 0.223  | 0.0104  |

|              |       |        |         |
|--------------|-------|--------|---------|
| POSTN        | 0.879 | 0.223  | 0.0111  |
| FCGBP        | 0.827 | 0.2231 | 0.0025  |
| DCX          | 0.872 | 0.2231 | 0.0051  |
| EPM2AIP1     | 0.929 | 0.2231 | 0.0388  |
| LINC01907    | 0     | 0.2232 | 0.0032  |
| KRT8P13      | 0.193 | 0.2232 | 0.0037  |
| ZNF550       | 0.855 | 0.2233 | 0.0097  |
| ADORA2B      | 0.843 | 0.2234 | 0.0021  |
| TP53         | 0.812 | 0.2234 | 0.0032  |
| TRMT2A       | 0.795 | 0.2234 | 0.0075  |
| ZNF81        | 0.918 | 0.2234 | 0.041   |
| SERINC2      | 0.663 | 0.2235 | 0.0002  |
| SSH1         | 0.855 | 0.2235 | 0.0074  |
| DOCK4        | 0.928 | 0.2235 | 0.0337  |
| LOC79999     | 0     | 0.2235 | <0.0001 |
| PITRM1       | 0.805 | 0.2236 | 0.002   |
| FAN1         | 0.772 | 0.2236 | 0.0114  |
| SCYL3        | 0.887 | 0.2236 | 0.0135  |
| E2F4         | 0.915 | 0.2236 | 0.0223  |
| MIR8058      | 0.131 | 0.2237 | 0.0043  |
| TSFM         | 0.853 | 0.2238 | 0.0049  |
| TMEM144      | 0.772 | 0.2239 | 0.0009  |
| ZNF578       | 0.722 | 0.2239 | 0.0015  |
| RPL3P6       | 0.304 | 0.2239 | 0.0036  |
| LOC100233156 | 0.223 | 0.2239 | 0.0206  |
| TFDP3        | 0.611 | 0.2239 | <0.0001 |
| RN7SL393P    | 0     | 0.224  | 0.0018  |
| DOHH         | 0.843 | 0.224  | 0.003   |
| B3GNT3       | 0.707 | 0.2241 | 0.0002  |
| OR52E8       | 0.416 | 0.2241 | <0.0001 |
| RNU6-1206P   | 0     | 0.2244 | 0.0018  |
| KRTAP5-7     | 0.736 | 0.2244 | 0.0033  |
| PFDN5        | 0.924 | 0.2244 | 0.0434  |

|           |       |        |        |
|-----------|-------|--------|--------|
| EHF       | 0.779 | 0.2245 | 0.0005 |
| AGT       | 0.856 | 0.2246 | 0.0034 |
| CASP3     | 0.925 | 0.2247 | 0.0353 |
| LMAN2L    | 0.803 | 0.2248 | 0.0009 |
| DGAT1     | 0.813 | 0.2248 | 0.0016 |
| RNU7-160P | 0     | 0.2248 | 0.0018 |
| MRFAP1    | 0.772 | 0.2248 | 0.0023 |
| CFAP100   | 0.198 | 0.2248 | 0.0036 |
| MIR5691   | 0     | 0.2248 | 0.0041 |
| DSCR4     | 0.759 | 0.2249 | 0.0003 |
| M6PR      | 0.878 | 0.2249 | 0.0087 |
| PGAM2     | 0.844 | 0.225  | 0.0123 |
| RHPN1     | 0.854 | 0.225  | 0.0123 |
| MAGEA2B   | 0.746 | 0.225  | 0.0183 |
| CTSH      | 0.878 | 0.2251 | 0.0087 |
| AIFM3     | 0.827 | 0.2252 | 0.0031 |
| FAM192A   | 0.692 | 0.2252 | 0.0061 |
| RABL6     | 0.795 | 0.2253 | 0.0434 |
| TCP11L1   | 0.794 | 0.2254 | 0.0017 |
| SLN       | 0.876 | 0.2254 | 0.0104 |
| CACNB4    | 0.827 | 0.2255 | 0.0015 |
| S100A11   | 0.867 | 0.2255 | 0.0069 |
| C11orf45  | 0.82  | 0.2256 | 0.0068 |
| CCDC188   | 0     | 0.2257 | 0.0036 |
| UBQLN2    | 0.808 | 0.2258 | 0.0021 |
| SRP68P2   | 0     | 0.2258 | 0.0033 |
| TMEM161B  | 0.858 | 0.2258 | 0.0138 |
| MED13     | 0.853 | 0.2259 | 0.0049 |
| VPS41     | 0.892 | 0.2259 | 0.015  |
| LETM1P2   | 0     | 0.2261 | 0.004  |
| NKX2-2    | 0.807 | 0.2264 | 0.0017 |
| TMEM61    | 0.806 | 0.2264 | 0.0046 |
| CRYGS     | 0.836 | 0.2264 | 0.0073 |

|              |       |        |         |
|--------------|-------|--------|---------|
| NOL3         | 0.905 | 0.2264 | 0.0217  |
| CDS1         | 0.839 | 0.2266 | 0.0018  |
| RPRML        | 0.803 | 0.2266 | 0.0052  |
| LOC101927950 | 0.31  | 0.2266 | <0.0001 |
| SULT1C3      | 0.575 | 0.2267 | 0.0007  |
| CORO1C       | 0.886 | 0.2267 | 0.0092  |
| SOAT2        | 0.781 | 0.2268 | 0.0009  |
| RAB7A        | 0.817 | 0.2268 | 0.0041  |
| GPX1         | 0.753 | 0.2269 | 0.0007  |
| LPCAT4       | 0.766 | 0.227  | 0.0016  |
| SLC25A3P2    | 0     | 0.227  | 0.0032  |
| LOC199882    | 0.13  | 0.2271 | 0.0222  |
| HDLBP        | 0.838 | 0.2272 | 0.0017  |
| RHBDL1       | 0.839 | 0.2273 | 0.0044  |
| ADRA2C       | 0.885 | 0.2274 | 0.0104  |
| SERPINB9P1   | 0.593 | 0.2274 | 0.0345  |
| ZNF79        | 0.705 | 0.2275 | 0.0001  |
| RPL21P54     | 0.303 | 0.2277 | 0.0031  |
| RPL18A       | 0.827 | 0.2277 | 0.0282  |
| OFD1         | 0.875 | 0.2279 | 0.011   |
| AXIN1        | 0.801 | 0.228  | 0.0005  |
| NDOR1        | 0.843 | 0.228  | 0.0051  |
| TPRN         | 0.804 | 0.228  | 0.0163  |
| SNORA22      | 0.259 | 0.228  | <0.0001 |
| WDR54        | 0.856 | 0.2281 | 0.0116  |
| LINC01029    | 0     | 0.2282 | <0.0001 |
| MRPL15P1     | 0     | 0.2283 | 0.003   |
| BCCIP        | 0.876 | 0.2283 | 0.0062  |
| RPL5         | 0.874 | 0.2283 | 0.0417  |
| RN7SL845P    | 0     | 0.2284 | 0.0015  |
| TIA1         | 0.926 | 0.2284 | 0.0382  |
| VHL          | 0.905 | 0.2288 | 0.0201  |
| DNM3-IT1     | 0     | 0.2289 | 0.0011  |

|           |       |        |         |
|-----------|-------|--------|---------|
| WDR88     | 0.91  | 0.2289 | 0.0402  |
| CHCHD5    | 0.743 | 0.229  | 0.0004  |
| SLC25A1   | 0.811 | 0.229  | 0.0015  |
| LINC00200 | 0.414 | 0.2291 | 0.0003  |
| IZUMO1    | 0.763 | 0.2291 | 0.0007  |
| DYNLT3    | 0.81  | 0.2291 | 0.0007  |
| ZNF284    | 0.892 | 0.2293 | 0.0289  |
| ZNF558    | 0.911 | 0.2293 | 0.0436  |
| LGALS1    | 0.81  | 0.2294 | 0.0006  |
| LRRC31    | 0.808 | 0.2294 | 0.0009  |
| RNA5SP342 | 0     | 0.2294 | 0.0016  |
| BRD2      | 0.882 | 0.2294 | 0.0055  |
| RBMY1F    | 0.542 | 0.2294 | 0.01    |
| C2CD4A    | 0.77  | 0.2295 | 0.0032  |
| ARHGEF19  | 0.846 | 0.2295 | 0.0046  |
| H2AFJ     | 0.747 | 0.2296 | 0.0006  |
| MAP2K6    | 0.86  | 0.2298 | 0.0029  |
| REG3G     | 0.56  | 0.2301 | <0.0001 |
| TMEM171   | 0.521 | 0.2303 | <0.0001 |
| RN7SL151P | 0     | 0.2305 | 0.0032  |
| DDX53     | 0.842 | 0.2305 | 0.0049  |
| CUL1      | 0.915 | 0.2305 | 0.0174  |
| SDHAF1    | 0.774 | 0.2306 | 0.009   |
| LINC00958 | 0.604 | 0.2306 | 0.0273  |
| SNRNP48   | 0.877 | 0.2307 | 0.0418  |
| MIR6856   | 0     | 0.2308 | 0.0032  |
| LEPROT    | 0.901 | 0.2308 | 0.0143  |
| KIAA0895  | 0.828 | 0.231  | 0.0033  |
| ELK3      | 0.914 | 0.231  | 0.0177  |
| PRMT7     | 0.748 | 0.2311 | 0.0003  |
| RPL31     | 0.875 | 0.2311 | 0.0092  |
| ACSL6     | 0.824 | 0.2313 | 0.0012  |
| PPP1R14C  | 0.552 | 0.2313 | <0.0001 |

|            |       |        |         |
|------------|-------|--------|---------|
| OR52K3P    | 0.728 | 0.2314 | 0.0093  |
| CT45A2     | 0     | 0.2314 | 0.014   |
| ASCL5      | 0.787 | 0.2314 | 0.0187  |
| KCNK9      | 0.853 | 0.2316 | 0.0053  |
| METTL15    | 0.699 | 0.2316 | 0.0116  |
| MIR4458HG  | 0.033 | 0.2319 | 0.0022  |
| MLLT6      | 0.833 | 0.232  | 0.0111  |
| TMEM39B    | 0.778 | 0.2321 | 0.0007  |
| XKR3       | 0.437 | 0.2321 | <0.0001 |
| LGI2       | 0.83  | 0.2322 | 0.0013  |
| TNFRSF12A  | 0.922 | 0.2322 | 0.0301  |
| RNU6-1310P | 0     | 0.2323 | 0.0012  |
| MYL6P2     | 0     | 0.2323 | 0.0025  |
| RBMY1D     | 0.207 | 0.2324 | 0.0062  |
| CASP12     | 0.735 | 0.2325 | 0.0025  |
| ELOVL3     | 0.841 | 0.2325 | 0.0041  |
| ZFP30      | 0.751 | 0.2326 | 0.0006  |
| CMTM8      | 0.757 | 0.2327 | 0.0003  |
| STAU1      | 0.883 | 0.2327 | 0.0093  |
| RNU6-695P  | 0.47  | 0.2328 | 0.0012  |
| TRPC4AP    | 0.904 | 0.2328 | 0.0216  |
| DEDD2      | 0.47  | 0.2328 | <0.0001 |
| RABGAP1L   | 0.845 | 0.2329 | 0.003   |
| FOXO4      | 0.883 | 0.2329 | 0.007   |
| GPR176     | 0.915 | 0.233  | 0.0169  |
| MFAP2      | 0.829 | 0.2331 | 0.0009  |
| HCG4P8     | 0     | 0.2331 | 0.0024  |
| HERC2P8    | 0     | 0.2331 | 0.0024  |
| CTNBL1     | 0.856 | 0.2331 | 0.003   |
| VCAN-AS1   | 0.226 | 0.2333 | 0.0009  |
| RARRES1    | 0.739 | 0.2335 | 0.0003  |
| PITX2      | 0.853 | 0.2335 | 0.0062  |
| PCDHGB3    | 0.347 | 0.2335 | <0.0001 |



|                 |       |        |         |
|-----------------|-------|--------|---------|
| ITPKC           | 0.859 | 0.2336 | 0.0031  |
| SPATS2L         | 0.887 | 0.2336 | 0.0421  |
| GSTO3P          | 0     | 0.2341 | 0.0011  |
| HIST1H2AA       | 0.724 | 0.2341 | 0.0018  |
| CALCB           | 0.871 | 0.2341 | 0.0042  |
| TMPRSS9         | 0.671 | 0.2342 | 0.0006  |
| NBPF4           | 0.831 | 0.2343 | 0.0096  |
| ZNF222          | 0.693 | 0.2343 | <0.0001 |
| ZNF562          | 0.81  | 0.2345 | 0.0013  |
| SLC39A9         | 0.809 | 0.2345 | 0.0015  |
| PTBP1P          | 0     | 0.2345 | 0.0023  |
| ANKHD1-EIF4EBP3 | 0.725 | 0.2345 | 0.0122  |
| RASGRF1         | 0.839 | 0.2346 | 0.0022  |
| GAGE12J         | 0     | 0.2346 | <0.0001 |
| MLX             | 0.747 | 0.2347 | 0.0003  |
| SLC38A1         | 0.786 | 0.2347 | 0.0007  |
| GRIA2           | 0.825 | 0.2347 | 0.0008  |
| TEKT5           | 0.472 | 0.2347 | <0.0001 |
| TMEM38A         | 0.706 | 0.235  | 0.0003  |
| USP28           | 0.85  | 0.235  | 0.0088  |
| CD59            | 0.897 | 0.2352 | 0.008   |
| HAPLN3          | 0.755 | 0.2353 | 0.0004  |
| CCDC96          | 0.9   | 0.2353 | 0.0184  |
| SIX2            | 0.876 | 0.2354 | 0.0092  |
| C18orf25        | 0.9   | 0.2354 | 0.0124  |
| GNA13           | 0.918 | 0.2354 | 0.017   |
| DENND6B         | 0.749 | 0.2355 | 0.0233  |
| SNORA59B        | 0.449 | 0.2355 | <0.0001 |
| METTL8          | 0.615 | 0.2356 | <0.0001 |
| CSNK1G2         | 0.906 | 0.2357 | 0.0105  |
| SPAG6           | 0.699 | 0.2358 | <0.0001 |
| GRM7-AS3        | 0.367 | 0.2359 | 0.0008  |
| OR7E43P         | 0.358 | 0.2359 | 0.001   |

|           |       |        |         |
|-----------|-------|--------|---------|
| SFXN4     | 0.836 | 0.236  | 0.0075  |
| TBKBP1    | 0.887 | 0.2361 | 0.0114  |
| ARL16     | 0.896 | 0.2362 | 0.0191  |
| PLEKHM2   | 0.715 | 0.2363 | 0.0001  |
| GRM5-AS1  | 0     | 0.2363 | 0.0007  |
| LINC01031 | 0     | 0.2364 | 0.002   |
| C22orf39  | 0.515 | 0.2364 | <0.0001 |
| PAPPA2    | 0.674 | 0.2365 | <0.0001 |
| GSTA9P    | 0.452 | 0.2366 | 0.0023  |
| LRRC8A    | 0.813 | 0.2367 | 0.0014  |
| MRPS28    | 0.827 | 0.2367 | 0.0025  |
| AP2A1     | 0.836 | 0.2367 | 0.0027  |
| NEK3      | 0.886 | 0.2367 | 0.0083  |
| SLC7A14   | 0.565 | 0.2367 | <0.0001 |
| SH3GL3    | 0.801 | 0.2368 | 0.0007  |
| HNRNPA1P6 | 0     | 0.2368 | 0.0021  |
| INO80E    | 0.87  | 0.2368 | 0.0187  |
| TAF1      | 0.928 | 0.2368 | 0.0324  |
| OCLM      | 0.743 | 0.2369 | 0.0014  |
| MICA      | 0.89  | 0.2369 | 0.0088  |
| RPS6KB1   | 0.893 | 0.2369 | 0.0119  |
| RBPM52    | 0.762 | 0.237  | 0.001   |
| HOXA6     | 0.872 | 0.237  | 0.0044  |
| PLOD2     | 0.879 | 0.237  | 0.0068  |
| NACA2     | 0.747 | 0.2372 | 0.0009  |
| TPCN1     | 0.858 | 0.2372 | 0.0045  |
| GNL1      | 0.91  | 0.2373 | 0.0119  |
| DGKZ      | 0.928 | 0.2373 | 0.0232  |
| URB1-AS1  | 0.081 | 0.2374 | 0.0011  |
| LY6K      | 0.774 | 0.2375 | 0.0006  |
| RPS20P32  | 0     | 0.2375 | 0.0008  |
| CEP57L1P1 | 0.223 | 0.2375 | 0.0011  |
| NDUFS4    | 0.865 | 0.2375 | 0.0058  |

|           |       |        |         |
|-----------|-------|--------|---------|
| KRT17     | 0.87  | 0.2375 | 0.007   |
| HOXA3     | 0.891 | 0.2376 | 0.007   |
| SMN2      | 0.732 | 0.2376 | 0.0085  |
| GPR161    | 0.805 | 0.2378 | 0.0011  |
| RPS6KA4   | 0.85  | 0.2378 | 0.0036  |
| DGUOK     | 0.892 | 0.2378 | 0.0059  |
| PGBD2     | 0.919 | 0.2378 | 0.0464  |
| FRZB      | 0.878 | 0.2379 | 0.0035  |
| TRHDE     | 0.499 | 0.2379 | <0.0001 |
| CXCL5     | 0.735 | 0.2379 | <0.0001 |
| ZBED2     | 0.757 | 0.238  | 0.0003  |
| SNAP29    | 0.856 | 0.238  | 0.0045  |
| NDUFB7    | 0.87  | 0.238  | 0.0049  |
| SNORD55   | 0.49  | 0.2381 | 0.0005  |
| SLC9A3P3  | 0     | 0.2381 | 0.002   |
| P2RY2     | 0.871 | 0.2381 | 0.0058  |
| ZNF557    | 0.884 | 0.2382 | 0.0095  |
| ZC3H15    | 0.901 | 0.2382 | 0.014   |
| CNOT1     | 0.811 | 0.2384 | 0.0005  |
| WWP1P1    | 0     | 0.2385 | 0.0009  |
| ABI2      | 0.88  | 0.2385 | 0.0042  |
| ARHGAP5   | 0.903 | 0.2385 | 0.0095  |
| NCK1      | 0.913 | 0.2385 | 0.0192  |
| SUFU      | 0.798 | 0.2386 | 0.0025  |
| NT5DC3    | 0.882 | 0.2387 | 0.01    |
| MIR6833   | 0     | 0.2388 | 0.0023  |
| STK19     | 0.781 | 0.2389 | 0.0009  |
| NMNAT3    | 0.867 | 0.239  | 0.0113  |
| CAPN8     | 0.644 | 0.2391 | <0.0001 |
| ETF1      | 0.924 | 0.2392 | 0.0201  |
| NDUFB5    | 0.906 | 0.2393 | 0.0216  |
| ATP6V1B1  | 0.856 | 0.2397 | 0.0018  |
| LINC01511 | 0     | 0.2397 | 0.0022  |

|           |       |        |         |
|-----------|-------|--------|---------|
| GULP1     | 0.716 | 0.2397 | <0.0001 |
| SPG21     | 0.841 | 0.2398 | 0.0024  |
| PIGK      | 0.871 | 0.2398 | 0.0049  |
| PGBD4P3   | 0     | 0.2399 | 0.0018  |
| B4GALT4   | 0.887 | 0.2399 | 0.0062  |
| KIAA1614  | 0.907 | 0.2399 | 0.0141  |
| LIN7B     | 0.77  | 0.24   | 0.0002  |
| FAM98A    | 0.883 | 0.24   | 0.0058  |
| OR13A1    | 0.491 | 0.24   | <0.0001 |
| RPL27A    | 0.902 | 0.2401 | 0.0187  |
| AKR1C1    | 0.793 | 0.2403 | 0.0005  |
| CSTL1     | 0.562 | 0.2403 | <0.0001 |
| POLR2B    | 0.889 | 0.2404 | 0.0126  |
| ENPP6     | 0.37  | 0.2404 | <0.0001 |
| RGMA      | 0.816 | 0.2405 | 0.0031  |
| HP1BP3    | 0.924 | 0.2405 | 0.0217  |
| PRAMEF6   | 0.458 | 0.2405 | <0.0001 |
| UGT8      | 0.757 | 0.2406 | 0.0001  |
| RILPL1    | 0.855 | 0.2406 | 0.0185  |
| LSM3P3    | 0     | 0.2407 | 0.0008  |
| SNORD28   | 0.344 | 0.2407 | 0.0017  |
| CDC42SE2  | 0.899 | 0.2407 | 0.0111  |
| MIR1269A  | 0.308 | 0.2408 | 0.001   |
| LINC00494 | 0.443 | 0.2408 | <0.0001 |
| MIR8055   | 0     | 0.2409 | 0.0021  |
| DNASE2B   | 0.795 | 0.241  | 0.0003  |
| LGALS4    | 0.795 | 0.2411 | 0.0002  |
| CARD10    | 0.835 | 0.2411 | 0.001   |
| FAXC      | 0.619 | 0.2412 | 0.0074  |
| MCCD1     | 0.717 | 0.2413 | 0.0007  |
| RRM2B     | 0.866 | 0.2413 | 0.0097  |
| NOLC1     | 0.918 | 0.2413 | 0.0213  |
| NAALADL1  | 0.596 | 0.2413 | <0.0001 |

|              |       |        |         |
|--------------|-------|--------|---------|
| ST13P15      | 0     | 0.2414 | 0.0017  |
| EMC9         | 0.695 | 0.2414 | 0.0102  |
| ARL3         | 0.91  | 0.2414 | 0.0111  |
| GIGYF1       | 0.911 | 0.2415 | 0.0365  |
| FARSA-AS1    | 0     | 0.2416 | 0.002   |
| GAP43        | 0.882 | 0.2416 | 0.004   |
| OLFM2        | 0.7   | 0.2419 | 0.0002  |
| ANKRD50      | 0.772 | 0.2419 | 0.0004  |
| ZNF793       | 0.781 | 0.2419 | 0.0016  |
| SHROOM2P1    | 0.46  | 0.2419 | 0.0017  |
| DPP4         | 0.868 | 0.2419 | 0.0022  |
| MBD6         | 0.93  | 0.2419 | 0.0385  |
| LINC00339    | 0.259 | 0.2419 | <0.0001 |
| MRPL2        | 0.707 | 0.2419 | <0.0001 |
| PRPF18       | 0.88  | 0.242  | 0.0086  |
| IL1RAPL1     | 0.705 | 0.242  | <0.0001 |
| SNORA65      | 0.775 | 0.2421 | 0.0052  |
| CCR8         | 0.899 | 0.2421 | 0.0099  |
| TUBA3E       | 0.638 | 0.2422 | 0.0006  |
| LINC00278    | 0.475 | 0.2424 | 0.0004  |
| INIP         | 0.591 | 0.2424 | 0.0081  |
| NAA15        | 0.81  | 0.2424 | 0.0083  |
| LOC101928009 | 0     | 0.2425 | <0.0001 |
| LINC01096    | 0.419 | 0.2425 | <0.0001 |
| OR11N1P      | 0     | 0.2426 | 0.0005  |
| MRPS35       | 0.866 | 0.2426 | 0.0052  |
| XRCC5        | 0.916 | 0.2426 | 0.0195  |
| ZNF639       | 0.679 | 0.2426 | <0.0001 |
| TCF12        | 0.864 | 0.2427 | 0.004   |
| PLCH1        | 0.751 | 0.2428 | 0.0003  |
| RN7SL706P    | 0     | 0.2429 | 0.0007  |
| ZNF230       | 0.734 | 0.243  | 0.0002  |
| NME3         | 0.792 | 0.2431 | 0.0004  |

|              |       |        |         |
|--------------|-------|--------|---------|
| MSH4         | 0.602 | 0.2431 | <0.0001 |
| EMC10        | 0.832 | 0.2432 | 0.048   |
| HMGB3P20     | 0     | 0.2433 | 0.0007  |
| EIF3L        | 0.759 | 0.2433 | 0.0008  |
| CPNE5        | 0.88  | 0.2433 | 0.0073  |
| HCCS         | 0.928 | 0.2433 | 0.0186  |
| TNFRSF9      | 0.863 | 0.2434 | 0.0033  |
| ZNF679       | 0.547 | 0.2436 | 0.0006  |
| HPS6         | 0.881 | 0.2436 | 0.0044  |
| SP8          | 0.84  | 0.2436 | 0.0063  |
| TMEM119      | 0.688 | 0.2438 | 0.0001  |
| DAB2IP       | 0.78  | 0.244  | 0.0005  |
| GPR4         | 0.86  | 0.244  | 0.0019  |
| FGF19        | 0.639 | 0.244  | <0.0001 |
| RHOQ         | 0.791 | 0.2442 | 0.0007  |
| TRAV18       | 0     | 0.2442 | 0.0012  |
| AKAP1        | 0.919 | 0.2443 | 0.0125  |
| PPP5C        | 0.845 | 0.2445 | 0.0017  |
| GFM2         | 0.839 | 0.2445 | 0.0021  |
| SRSF3        | 0.793 | 0.2445 | 0.0104  |
| ABCA4        | 0.78  | 0.2445 | <0.0001 |
| TSC22D4      | 0.769 | 0.2446 | 0.0003  |
| C19orf57     | 0.928 | 0.2447 | 0.0236  |
| GPR37L1      | 0.787 | 0.2449 | 0.0002  |
| WDR48        | 0.776 | 0.2449 | 0.0006  |
| MYNN         | 0.807 | 0.2449 | 0.0012  |
| FAM149B1     | 0.868 | 0.2451 | 0.0098  |
| DPP10-AS3    | 0.282 | 0.2452 | <0.0001 |
| LOC644554    | 0.261 | 0.2453 | 0.0026  |
| CYP19A1      | 0.864 | 0.2453 | 0.0028  |
| RAPGEF6      | 0.874 | 0.2453 | 0.0053  |
| LOC101929657 | 0     | 0.2453 | <0.0001 |
| PEF1         | 0.637 | 0.2453 | <0.0001 |

|              |       |        |         |
|--------------|-------|--------|---------|
| ADAMTS19-AS1 | 0     | 0.2454 | 0.0017  |
| INPP5J       | 0.814 | 0.2454 | 0.0025  |
| TMEM107      | 0.883 | 0.2454 | 0.015   |
| AHCYL1       | 0.871 | 0.2455 | 0.0022  |
| UTRN         | 0.718 | 0.2455 | <0.0001 |
| GPC5-IT1     | 0     | 0.2456 | 0.0006  |
| HLA-G        | 0.912 | 0.2456 | 0.0117  |
| RNU6-190P    | 0.335 | 0.2457 | 0.0007  |
| HMGB1P16     | 0     | 0.2458 | 0.0014  |
| GRPEL2-AS1   | 0     | 0.2458 | 0.0017  |
| VAMP1        | 0.935 | 0.2458 | 0.0341  |
| ADAMTS18     | 0.827 | 0.2459 | 0.0013  |
| MIR7849      | 0     | 0.2459 | 0.0017  |
| CTDSP2       | 0.917 | 0.2459 | 0.0133  |
| NPEPL1       | 0.932 | 0.2459 | 0.0354  |
| RPS2P46      | 0     | 0.2461 | 0.0014  |
| BRAF         | 0.887 | 0.2463 | 0.0047  |
| FBLL1        | 0.691 | 0.2463 | 0.0116  |
| NANOGP1      | 0.74  | 0.2463 | 0.0149  |
| LRRC24       | 0.846 | 0.2463 | 0.0447  |
| TMEM60       | 0.823 | 0.2466 | 0.0028  |
| SNHG12       | 0.679 | 0.2467 | 0.025   |
| FOXP1        | 0.936 | 0.2467 | 0.0342  |
| LOC442028    | 0.341 | 0.2468 | 0.0004  |
| NSUN3        | 0.778 | 0.2469 | 0.0003  |
| KIAA0355     | 0.877 | 0.2469 | 0.0026  |
| ZNF169       | 0.908 | 0.2469 | 0.0273  |
| MAGEA4       | 0.83  | 0.247  | 0.0005  |
| HMGB1P46     | 0     | 0.247  | 0.0013  |
| JOSD1        | 0.863 | 0.247  | 0.0017  |
| RFX6         | 0.616 | 0.2471 | 0.0002  |
| SLC29A4      | 0.67  | 0.2471 | 0.0003  |
| MIR5687      | 0.095 | 0.2471 | 0.0012  |

|                        |       |        |         |
|------------------------|-------|--------|---------|
| HNRNPKP5               | 0     | 0.2471 | 0.0013  |
| DTX2P1-UPK3BP1-PMS2P11 | 0.653 | 0.2472 | 0.0347  |
| ZDHHC14                | 0.727 | 0.2472 | <0.0001 |
| GP2                    | 0.801 | 0.2473 | 0.0002  |
| KRT8P3                 | 0.241 | 0.2473 | 0.0013  |
| OR51E2                 | 0.878 | 0.2473 | 0.0076  |
| C20orf144              | 0.917 | 0.2473 | 0.0265  |
| NUTM2A-AS1             | 0.321 | 0.2473 | <0.0001 |
| MALL                   | 0.829 | 0.2474 | 0.0005  |
| DDHD1                  | 0.84  | 0.2474 | 0.0019  |
| KRTAP5-6               | 0.86  | 0.2474 | 0.0109  |
| BTF3L4                 | 0.842 | 0.2478 | 0.0027  |
| CREB1                  | 0.896 | 0.2478 | 0.005   |
| CA4                    | 0.876 | 0.2479 | 0.0022  |
| RGS9BP                 | 0.817 | 0.2479 | 0.0023  |
| PLCB4                  | 0.818 | 0.248  | 0.0006  |
| DIRAS1                 | 0.858 | 0.248  | 0.0025  |
| MYH4                   | 0.854 | 0.248  | 0.0033  |
| ZNF674                 | 0.857 | 0.248  | 0.0072  |
| PGAM5                  | 0.865 | 0.248  | 0.0114  |
| MED14                  | 0.781 | 0.2481 | 0.0004  |
| DSCR9                  | 0.844 | 0.2481 | 0.0085  |
| ALOX15B                | 0.833 | 0.2482 | 0.0004  |
| FTH1P14                | 0.169 | 0.2482 | 0.0006  |
| FAM89B                 | 0.933 | 0.2482 | 0.0264  |
| SKIV2L                 | 0.908 | 0.2483 | 0.0124  |
| SPTY2D1                | 0.853 | 0.2485 | 0.0061  |
| HDDC2                  | 0.807 | 0.2486 | 0.0003  |
| RPL12                  | 0.814 | 0.2486 | 0.0025  |
| RNF17                  | 0.713 | 0.2486 | <0.0001 |
| TFB2M                  | 0.831 | 0.2487 | 0.0014  |
| PSMB9                  | 0.895 | 0.2487 | 0.0101  |
| HSPA2                  | 0.932 | 0.2487 | 0.0211  |



|            |       |        |         |
|------------|-------|--------|---------|
| DNER       | 0.526 | 0.2488 | <0.0001 |
| TMEM87A    | 0.709 | 0.2488 | <0.0001 |
| ZNF70      | 0.711 | 0.2489 | 0.0002  |
| DEFA8P     | 0     | 0.249  | 0.0006  |
| PPT2       | 0.904 | 0.2492 | 0.0254  |
| RPL14      | 0.859 | 0.2494 | 0.0037  |
| EFNB2      | 0.906 | 0.2494 | 0.0072  |
| CHMP6      | 0.882 | 0.2495 | 0.0036  |
| RASSF1-AS1 | 0.016 | 0.2495 | <0.0001 |
| APLP1      | 0.822 | 0.2496 | 0.0003  |
| DMBT1      | 0.82  | 0.2501 | 0.0003  |
| RNU7-48P   | 0.2   | 0.2501 | 0.0004  |
| MICAL1     | 0.815 | 0.2501 | 0.0005  |
| ATG4C      | 0.857 | 0.2501 | 0.0029  |
| LINC01547  | 0     | 0.2502 | 0.0006  |
| PPP1R3F    | 0.764 | 0.2503 | 0.0012  |
| TMEM17     | 0.863 | 0.2503 | 0.0076  |
| RNU6-228P  | 0.183 | 0.2504 | 0.0005  |
| THAP3      | 0.85  | 0.2504 | 0.0023  |
| SPATA21    | 0.842 | 0.2504 | 0.005   |
| BDKRB2     | 0.921 | 0.2505 | 0.0115  |
| RNU6-431P  | 0     | 0.2506 | 0.0005  |
| MMP3       | 0.864 | 0.2506 | 0.0032  |
| CCDC71     | 0.884 | 0.2506 | 0.0037  |
| TGFBRAP1   | 0.891 | 0.2508 | 0.0061  |
| LINC01268  | 0.154 | 0.2508 | <0.0001 |
| ARNTL2     | 0.888 | 0.2509 | 0.0032  |
| RBPJ       | 0.862 | 0.2509 | 0.0036  |
| SLC5A6     | 0.893 | 0.251  | 0.0069  |
| RNU4-40P   | 0     | 0.2511 | 0.0005  |
| POM121     | 0.868 | 0.2511 | 0.0076  |
| RN7SKP55   | 0     | 0.2512 | 0.0005  |
| RAP2B      | 0.892 | 0.2512 | 0.0091  |

|            |       |        |         |
|------------|-------|--------|---------|
| DNASE1     | 0.868 | 0.2513 | 0.002   |
| UBE2F      | 0.827 | 0.2513 | 0.0029  |
| RCOR1      | 0.918 | 0.2513 | 0.0169  |
| CD99       | 0.929 | 0.2513 | 0.0195  |
| SPATA17    | 0.641 | 0.2514 | <0.0001 |
| PPA1       | 0.853 | 0.2516 | 0.0026  |
| RANBP3     | 0.872 | 0.2517 | 0.0032  |
| HSD17B14   | 0.81  | 0.2519 | 0.0003  |
| PCDH12     | 0.897 | 0.2519 | 0.0097  |
| MAPK13     | 0.829 | 0.252  | 0.0008  |
| PLCD3      | 0.833 | 0.252  | 0.0028  |
| ABHD14A    | 0.778 | 0.2521 | 0.0014  |
| TMEM186    | 0.763 | 0.2522 | 0.0003  |
| NSUN4      | 0.695 | 0.2523 | 0.0001  |
| TOMM22P5   | 0     | 0.2523 | 0.0005  |
| HERC1      | 0.893 | 0.2524 | 0.004   |
| TFDP1      | 0.867 | 0.2524 | 0.0051  |
| RNU6ATAC8P | 0.081 | 0.2525 | 0.0004  |
| DIABLO     | 0.909 | 0.2526 | 0.0082  |
| GSR        | 0.896 | 0.2527 | 0.0042  |
| C22orf23   | 0.924 | 0.2527 | 0.0287  |
| ODF2       | 0.84  | 0.2528 | 0.0015  |
| PDCD6IP    | 0.856 | 0.2528 | 0.0028  |
| CAPN10     | 0.904 | 0.2528 | 0.0072  |
| SKIDA1     | 0.731 | 0.2529 | 0.0231  |
| ZNF501     | 0.772 | 0.253  | 0.0009  |
| STRAP      | 0.886 | 0.2531 | 0.0053  |
| ZNF397     | 0.858 | 0.2531 | 0.0057  |
| KRBA1      | 0.869 | 0.2532 | 0.0057  |
| NAT14      | 0.769 | 0.2533 | 0.0005  |
| TCTN2      | 0.861 | 0.2533 | 0.0043  |
| CHORDC2P   | 0     | 0.2534 | 0.001   |
| MAN2A1     | 0.939 | 0.2534 | 0.0254  |

|            |       |        |         |
|------------|-------|--------|---------|
| BEX2       | 0.832 | 0.2535 | 0.0013  |
| PCSK1N     | 0.775 | 0.2536 | 0.0001  |
| MCOLN3     | 0.729 | 0.2537 | <0.0001 |
| PLA2G6     | 0.869 | 0.2538 | 0.0036  |
| STIM1      | 0.915 | 0.2538 | 0.0143  |
| GRP        | 0.843 | 0.2539 | 0.0006  |
| HNRNPA0    | 0.898 | 0.254  | 0.0077  |
| MYO6       | 0.812 | 0.2541 | 0.0004  |
| ADAM12     | 0.897 | 0.2541 | 0.004   |
| CXXC1      | 0.901 | 0.2542 | 0.0058  |
| RMDN1      | 0.409 | 0.2542 | <0.0001 |
| RNU6-383P  | 0.352 | 0.2544 | 0.0004  |
| N6AMT1     | 0.891 | 0.2545 | 0.0084  |
| FUNDC2     | 0.519 | 0.2545 | <0.0001 |
| EEF1B2P1   | 0.155 | 0.2546 | 0.0001  |
| ST6GALNAC5 | 0.658 | 0.2546 | <0.0001 |
| HMGB1P4    | 0.473 | 0.2547 | 0.0001  |
| ZNF774     | 0.84  | 0.2547 | 0.0127  |
| SIN3B      | 0.918 | 0.2547 | 0.0191  |
| RNU6-942P  | 0     | 0.2548 | 0.0004  |
| PDPK1      | 0.941 | 0.2548 | 0.0364  |
| ZNF527     | 0.727 | 0.255  | 0.0003  |
| ZIC1       | 0.899 | 0.255  | 0.0083  |
| TNFAIP6    | 0.816 | 0.2551 | 0.0005  |
| PXN        | 0.865 | 0.2551 | 0.0022  |
| PPM1M      | 0.699 | 0.2551 | <0.0001 |
| ITGAE      | 0.859 | 0.2552 | 0.0008  |
| LINC00972  | 0.318 | 0.2552 | 0.0011  |
| VPS26B     | 0.79  | 0.2553 | 0.0009  |
| TMEM167B   | 0.732 | 0.2554 | 0.0015  |
| PLEKHJ1    | 0.571 | 0.2555 | <0.0001 |
| TMED3      | 0.882 | 0.2557 | 0.006   |
| UBE2W      | 0.795 | 0.2558 | 0.0004  |

|              |       |        |         |
|--------------|-------|--------|---------|
| RNU6-354P    | 0     | 0.2559 | 0.0004  |
| GAGE13       | 0     | 0.2559 | 0.0025  |
| SNRPGP14     | 0.42  | 0.256  | 0.0009  |
| PAQR5        | 0.839 | 0.256  | 0.0014  |
| PFKP         | 0.799 | 0.2562 | 0.0002  |
| ZNF768       | 0.735 | 0.2562 | 0.001   |
| LMF2         | 0.623 | 0.2564 | <0.0001 |
| C3orf38      | 0.873 | 0.2565 | 0.0056  |
| LZTS3        | 0.762 | 0.2565 | 0.0149  |
| LYPLA1       | 0.811 | 0.2567 | 0.0002  |
| MOSPD3       | 0.783 | 0.2568 | 0.0002  |
| SLC22A4      | 0.835 | 0.2568 | 0.001   |
| EEFSEC       | 0.559 | 0.2568 | <0.0001 |
| MRFAP1L1     | 0.75  | 0.2568 | <0.0001 |
| BAD          | 0.801 | 0.257  | 0.0003  |
| GDAP2        | 0.859 | 0.2571 | 0.0014  |
| CDV3         | 0.895 | 0.2571 | 0.0045  |
| SLIRP        | 0.664 | 0.2572 | 0.0017  |
| MCF2L        | 0.883 | 0.2572 | 0.002   |
| FBRS         | 0.889 | 0.2573 | 0.0075  |
| LOC101593348 | 0     | 0.2573 | <0.0001 |
| TRAPPC2L     | 0.802 | 0.2574 | 0.0005  |
| PSME4        | 0.867 | 0.2574 | 0.0023  |
| ARIH1        | 0.82  | 0.2575 | 0.0004  |
| BAMBI        | 0.781 | 0.2575 | <0.0001 |
| MIR4795      | 0     | 0.2577 | 0.0003  |
| KARS         | 0.84  | 0.2578 | 0.0007  |
| CISD1        | 0.826 | 0.2578 | 0.0008  |
| TEAD4        | 0.884 | 0.258  | 0.0039  |
| ANKRD23      | 0.889 | 0.258  | 0.009   |
| RNU6-658P    | 0     | 0.2581 | 0.0003  |
| CNTD2        | 0.84  | 0.2581 | 0.0005  |
| HERC2P5      | 0.13  | 0.2581 | 0.0008  |

|              |       |        |         |
|--------------|-------|--------|---------|
| REG1B        | 0.813 | 0.2582 | 0.0004  |
| RAB28        | 0.85  | 0.2582 | 0.0012  |
| LOC101928068 | 0.361 | 0.2582 | <0.0001 |
| RPS24P12     | 0     | 0.2583 | 0.0008  |
| ZNF821       | 0.832 | 0.2583 | 0.0038  |
| DDX39BP1     | 0     | 0.2584 | 0.0008  |
| GPC6-AS1     | 0.196 | 0.2586 | 0.0002  |
| SPDYA        | 0.832 | 0.2586 | 0.0024  |
| MAEA         | 0.926 | 0.2586 | 0.0342  |
| PRR14L       | 0.827 | 0.2587 | 0.0188  |
| EEF1A1P42    | 0.717 | 0.2587 | 0.021   |
| XKRX         | 0.578 | 0.2587 | <0.0001 |
| ZNF408       | 0.749 | 0.2587 | <0.0001 |
| TRIM41       | 0.926 | 0.2588 | 0.0353  |
| TRDJ2        | 0.175 | 0.2589 | 0.0008  |
| C7orf26      | 0.852 | 0.2589 | 0.0011  |
| RFK          | 0.864 | 0.2589 | 0.0021  |
| CNOT8        | 0.812 | 0.259  | 0.0002  |
| SH3D21       | 0.769 | 0.259  | 0.0074  |
| ZNF813       | 0.869 | 0.2591 | 0.0114  |
| DUOX2        | 0.603 | 0.2591 | <0.0001 |
| PLAA         | 0.813 | 0.2592 | 0.0006  |
| GDF9         | 0.845 | 0.2594 | 0.0013  |
| RPL36AP6     | 0     | 0.2595 | 0.0003  |
| RNU7-10P     | 0     | 0.2595 | 0.0004  |
| SERINC5      | 0.737 | 0.2595 | <0.0001 |
| RRNAD1       | 0.502 | 0.2597 | 0.0001  |
| HK2          | 0.848 | 0.2599 | 0.0005  |
| ZNF479       | 0.717 | 0.2599 | 0.003   |
| DCAKD        | 0.719 | 0.2599 | <0.0001 |
| MIR5194      | 0     | 0.2601 | 0.0009  |
| ERICH4       | 0.671 | 0.2601 | 0.0349  |
| RYR2         | 0.752 | 0.2601 | <0.0001 |

|              |       |        |         |
|--------------|-------|--------|---------|
| CASKIN1      | 0.835 | 0.2602 | 0.0016  |
| DUS2         | 0.813 | 0.2602 | 0.0495  |
| WBP11        | 0.823 | 0.2604 | 0.0007  |
| TRIM4        | 0.827 | 0.2608 | 0.0017  |
| OGFOD3       | 0.776 | 0.2608 | 0.0178  |
| LOC101927914 | 0.159 | 0.2609 | <0.0001 |
| CFAP47       | 0     | 0.2613 | 0.0004  |
| FEM1A        | 0.866 | 0.2613 | 0.0026  |
| SEMA7A       | 0.881 | 0.2613 | 0.004   |
| NDUFB4       | 0.877 | 0.2613 | 0.0059  |
| BET1L        | 0.763 | 0.2613 | <0.0001 |
| MFAP5        | 0.861 | 0.2614 | 0.0006  |
| DHCR24       | 0.863 | 0.2615 | 0.0008  |
| SLC6A14      | 0.832 | 0.2616 | 0.0008  |
| ELMO2        | 0.867 | 0.2616 | 0.0012  |
| ZNF324B      | 0.828 | 0.2617 | 0.0023  |
| PPEF1        | 0.822 | 0.2618 | 0.0005  |
| TSPY4        | 0     | 0.2618 | 0.0029  |
| HIP1R        | 0.802 | 0.2619 | 0.0002  |
| FEM1B        | 0.915 | 0.262  | 0.0087  |
| SSBP4        | 0.776 | 0.2621 | 0.0005  |
| CHFR         | 0.863 | 0.2621 | 0.0011  |
| ASCC2        | 0.762 | 0.2621 | <0.0001 |
| HS6ST2       | 0.689 | 0.2622 | <0.0001 |
| IMPA1        | 0.921 | 0.2623 | 0.0086  |
| RNA5SP40     | 0.461 | 0.2623 | <0.0001 |
| LINC00173    | 0.496 | 0.2623 | <0.0001 |
| CCDC121      | 0.873 | 0.2624 | 0.0014  |
| NRXN3        | 0.836 | 0.2626 | 0.0006  |
| ZFYVE19      | 0.763 | 0.2627 | 0.0003  |
| FAM86MP      | 0.346 | 0.2628 | 0.0003  |
| PSMA5        | 0.938 | 0.2628 | 0.0287  |
| PARD3B       | 0.832 | 0.2629 | 0.002   |

|            |       |        |         |
|------------|-------|--------|---------|
| XAB2       | 0.706 | 0.2629 | <0.0001 |
| YIPF2      | 0.806 | 0.263  | 0.0007  |
| RPS2P32    | 0.401 | 0.263  | <0.0001 |
| ZFYVE9     | 0.82  | 0.2632 | 0.0005  |
| TMEM74B    | 0.711 | 0.2632 | 0.0037  |
| HERC2P4    | 0.765 | 0.2632 | 0.0127  |
| LINC01267  | 0.673 | 0.2632 | 0.032   |
| TRIP10     | 0.859 | 0.2633 | 0.0014  |
| POU6F2-AS2 | 0.26  | 0.2634 | <0.0001 |
| ANKMY1     | 0.821 | 0.2635 | 0.0002  |
| SLC6A2     | 0.814 | 0.2636 | 0.0002  |
| LRIG2      | 0.88  | 0.2637 | 0.0019  |
| SLC16A11   | 0.707 | 0.2637 | <0.0001 |
| SURF4      | 0.78  | 0.2638 | 0.0006  |
| DDRGK1     | 0.857 | 0.2638 | 0.0044  |
| HIST1H3I   | 0.881 | 0.2638 | 0.0062  |
| CA5B       | 0.792 | 0.2639 | 0.0001  |
| LINC01184  | 0     | 0.2639 | 0.0005  |
| RAB42      | 0.749 | 0.264  | 0.0006  |
| ITLN2      | 0.585 | 0.2643 | <0.0001 |
| MIER3      | 0.828 | 0.2644 | 0.0007  |
| NDUFB2     | 0.891 | 0.2645 | 0.0058  |
| LOC648987  | 0.791 | 0.2645 | 0.0185  |
| KLHDC9     | 0.85  | 0.2646 | 0.0013  |
| UPF3A      | 0.898 | 0.2648 | 0.0069  |
| FAM217B    | 0.667 | 0.2649 | 0.0076  |
| LINC01159  | 0.066 | 0.2649 | <0.0001 |
| LHFPL4     | 0.67  | 0.2649 | <0.0001 |
| UNC93B3    | 0     | 0.265  | 0.0002  |
| ROS1       | 0.865 | 0.265  | 0.0015  |
| USP34      | 0.904 | 0.2652 | 0.0064  |
| ZNF317     | 0.733 | 0.2653 | 0.0001  |
| PTPRJ-AS1  | 0     | 0.2653 | 0.0007  |

|              |       |        |         |
|--------------|-------|--------|---------|
| TM7SF2       | 0.849 | 0.2653 | 0.0008  |
| SCARNA16     | 0.632 | 0.2653 | 0.0215  |
| ZIC4         | 0.859 | 0.2654 | 0.0017  |
| RABEPK       | 0.895 | 0.2655 | 0.0047  |
| BORCS5       | 0     | 0.2656 | 0.0003  |
| RNGTT        | 0.878 | 0.2656 | 0.0023  |
| LOC100129098 | 0.337 | 0.2658 | <0.0001 |
| SLC2A3P1     | 0     | 0.2659 | <0.0001 |
| LINC01152    | 0     | 0.2661 | 0.0002  |
| MYT1         | 0.805 | 0.2662 | 0.0002  |
| AFF2         | 0.876 | 0.2662 | 0.001   |
| RWDD4P1      | 0     | 0.2663 | 0.0005  |
| KRT12        | 0.87  | 0.2663 | 0.0011  |
| CATSPER2     | 0.832 | 0.2663 | 0.0051  |
| ANO8         | 0.921 | 0.2663 | 0.0327  |
| LOC100506730 | 0.164 | 0.2664 | <0.0001 |
| EIF3F        | 0.825 | 0.2666 | 0.0009  |
| LAMP3        | 0.911 | 0.2666 | 0.005   |
| MTERF1       | 0.755 | 0.2666 | 0.0278  |
| POLR3GL      | 0.677 | 0.2667 | <0.0001 |
| ELF3         | 0.916 | 0.2668 | 0.0057  |
| GATAD2A      | 0.822 | 0.2669 | 0.0002  |
| TMCC1        | 0.829 | 0.2669 | 0.0005  |
| SPPL2A       | 0.764 | 0.2669 | 0.0019  |
| ROCK2        | 0.861 | 0.267  | 0.0019  |
| DUSP3        | 0.9   | 0.267  | 0.003   |
| VMAC         | 0.811 | 0.267  | 0.0085  |
| OSR1         | 0.762 | 0.2671 | 0.0002  |
| SNRPF2       | 0     | 0.2671 | 0.0005  |
| DNAJB5       | 0.853 | 0.2671 | 0.0006  |
| PRR16        | 0.678 | 0.2672 | <0.0001 |
| ZMYND8       | 0.856 | 0.2673 | 0.0017  |
| TRAPPC2      | 0.786 | 0.2674 | 0.0001  |



|              |       |        |         |
|--------------|-------|--------|---------|
| PPWD1        | 0.878 | 0.2674 | 0.003   |
| ACSM6        | 0     | 0.2674 | <0.0001 |
| SDAD1P2      | 0     | 0.2676 | 0.0005  |
| LYPLAL1-AS1  | 0     | 0.2676 | 0.0005  |
| MRPS21P9     | 0.001 | 0.2676 | 0.0005  |
| PDIK1L       | 0.832 | 0.2676 | 0.0017  |
| TGIF2LY      | 0.423 | 0.2676 | <0.0001 |
| RNU6-519P    | 0     | 0.2678 | 0.0002  |
| PGM5P4-AS1   | 0     | 0.2678 | 0.0006  |
| KISS1        | 0.876 | 0.2678 | 0.001   |
| LOC100270746 | 0.331 | 0.2679 | 0.0057  |
| ZNF283       | 0.789 | 0.268  | 0.0015  |
| ZNF419       | 0.793 | 0.2681 | 0.0002  |
| REXO2        | 0.77  | 0.2681 | 0.0003  |
| LINC01490    | 0     | 0.2681 | 0.0006  |
| LYPLA2       | 0.642 | 0.2681 | <0.0001 |
| TARBP2       | 0.83  | 0.2682 | 0.0004  |
| HOXB7        | 0.833 | 0.2683 | 0.0002  |
| ABCB10P1     | 0     | 0.2683 | 0.0005  |
| GRB10        | 0.911 | 0.2683 | 0.0044  |
| ZBTB8A       | 0.716 | 0.2684 | 0.0006  |
| USP46-AS1    | 0     | 0.2684 | <0.0001 |
| ZNF534       | 0.626 | 0.2685 | 0.0003  |
| YOD1         | 0.825 | 0.2685 | 0.0006  |
| ZNF583       | 0.667 | 0.2686 | <0.0001 |
| DHX9P1       | 0     | 0.2687 | 0.0005  |
| MTF2         | 0.889 | 0.2687 | 0.0045  |
| WDR19        | 0.922 | 0.2687 | 0.0148  |
| RNU6-979P    | 0     | 0.2689 | 0.0002  |
| RNU6-800P    | 0     | 0.2689 | 0.0002  |
| MAST1        | 0.871 | 0.2689 | 0.0007  |
| SNAP23       | 0.881 | 0.2689 | 0.0026  |
| GUF1         | 0.838 | 0.269  | 0.0003  |

|           |       |        |         |
|-----------|-------|--------|---------|
| STRA6     | 0.741 | 0.269  | <0.0001 |
| APH1B     | 0.89  | 0.2691 | 0.0022  |
| PMS2P10   | 0     | 0.2692 | 0.0005  |
| ZMYM4     | 0.815 | 0.2693 | 0.0004  |
| HEG1      | 0.854 | 0.2693 | 0.0006  |
| USP30     | 0.864 | 0.2693 | 0.0039  |
| MED15     | 0.766 | 0.2694 | <0.0001 |
| TLN2      | 0.882 | 0.2695 | 0.0027  |
| SLC22A12  | 0.702 | 0.2695 | <0.0001 |
| ZNF436    | 0.812 | 0.2697 | 0.0007  |
| TCAP      | 0.856 | 0.2697 | 0.0013  |
| CDRT1     | 0.876 | 0.2697 | 0.0025  |
| KDM5C     | 0.814 | 0.2697 | 0.0035  |
| TSSK6     | 0.839 | 0.2699 | 0.002   |
| REEP2     | 0.914 | 0.2699 | 0.0085  |
| ACTA1     | 0.926 | 0.27   | 0.0082  |
| STEAP1    | 0.878 | 0.2701 | 0.0022  |
| CNNM2     | 0.835 | 0.2702 | 0.0002  |
| ZSCAN12P1 | 0.651 | 0.2702 | 0.0205  |
| MID1      | 0.897 | 0.2704 | 0.0022  |
| SMIM7     | 0.845 | 0.2705 | 0.0475  |
| ADAM17    | 0.879 | 0.2706 | 0.0011  |
| CUX1      | 0.847 | 0.2706 | 0.0023  |
| TADA1     | 0.825 | 0.2707 | 0.0065  |
| ATXN7L2   | 0.92  | 0.2707 | 0.0132  |
| CTSC      | 0.874 | 0.2708 | 0.0008  |
| LINC01204 | 0     | 0.2708 | <0.0001 |
| OR5H2     | 0.546 | 0.2708 | <0.0001 |
| ALPK2     | 0.692 | 0.2708 | <0.0001 |
| TRPS1     | 0.703 | 0.2708 | <0.0001 |
| CSRNP2    | 0.836 | 0.2709 | 0.0017  |
| RPL12P2   | 0     | 0.2709 | <0.0001 |
| ZNF492    | 0.826 | 0.271  | 0.0018  |

|           |       |        |         |
|-----------|-------|--------|---------|
| CREB3L1   | 0.824 | 0.271  | <0.0001 |
| SLC12A7   | 0.854 | 0.2711 | 0.0011  |
| THBS3     | 0.868 | 0.2711 | 0.0012  |
| ATF7      | 0.936 | 0.2711 | 0.0134  |
| LINC00668 | 0.75  | 0.2711 | 0.0429  |
| GAS2L1    | 0.898 | 0.2712 | 0.0024  |
| ELOVL4    | 0.549 | 0.2712 | <0.0001 |
| LINC01424 | 0.644 | 0.2713 | 0.0276  |
| SETP12    | 0     | 0.2714 | 0.0004  |
| ESAM      | 0.818 | 0.2714 | 0.0004  |
| RNF19B    | 0.807 | 0.2715 | 0.0004  |
| LINC01614 | 0.164 | 0.2715 | 0.0005  |
| PLEKHA5   | 0.753 | 0.2716 | <0.0001 |
| ASNSD1    | 0.869 | 0.2717 | 0.001   |
| HOXC6     | 0.889 | 0.2718 | 0.0017  |
| TIMM8A    | 0.868 | 0.2721 | 0.0014  |
| MIR4802   | 0     | 0.2722 | 0.0002  |
| TRIM54    | 0.841 | 0.2723 | 0.0015  |
| BLMH      | 0.836 | 0.2724 | 0.0001  |
| PDE4C     | 0.917 | 0.2724 | 0.021   |
| EID3      | 0.809 | 0.2725 | 0.0004  |
| GMPPB     | 0.873 | 0.2726 | 0.0056  |
| XRRA1     | 0.667 | 0.2726 | <0.0001 |
| CPT1C     | 0.747 | 0.2726 | <0.0001 |
| WBP2NL    | 0.782 | 0.2727 | 0.0003  |
| EEF1A1P30 | 0     | 0.2727 | 0.0004  |
| SEZ6      | 0.738 | 0.2728 | 0.0002  |
| LOC440910 | 0.373 | 0.2728 | 0.0008  |
| ZNF785    | 0.847 | 0.2728 | 0.0019  |
| TRAK2     | 0.846 | 0.2729 | 0.0006  |
| PCNP      | 0.858 | 0.2729 | 0.0013  |
| MCHR1     | 0.899 | 0.2729 | 0.0027  |
| NUDT14    | 0.753 | 0.273  | 0.0002  |

|              |       |        |         |
|--------------|-------|--------|---------|
| C1GALT1C1L   | 0.384 | 0.2731 | 0.0003  |
| GAL3ST4      | 0.833 | 0.2732 | 0.0002  |
| RNU4ATAC     | 0.397 | 0.2732 | <0.0001 |
| EIF4EBP2     | 0.907 | 0.2733 | 0.0037  |
| FAM53B       | 0.836 | 0.2734 | 0.0001  |
| SCUBE1       | 0.764 | 0.2734 | 0.0002  |
| TPM4         | 0.872 | 0.2734 | 0.0023  |
| TRAF3IP2-AS1 | 0.673 | 0.2734 | 0.0184  |
| TNFRSF11A    | 0.748 | 0.2735 | <0.0001 |
| COX7A2P2     | 0     | 0.2736 | 0.0001  |
| KRT18P24     | 0     | 0.2738 | 0.0005  |
| RNF103       | 0.86  | 0.274  | 0.0011  |
| COPS3        | 0.869 | 0.2741 | 0.0006  |
| IGDCC3       | 0.7   | 0.2743 | <0.0001 |
| LINC01423    | 0     | 0.2746 | 0.0003  |
| ANKS3        | 0.884 | 0.2746 | 0.0031  |
| GAA          | 0.899 | 0.2748 | 0.002   |
| LRIG3        | 0.719 | 0.2748 | <0.0001 |
| LINC01311    | 0.247 | 0.2749 | 0.0004  |
| MFHAS1       | 0.838 | 0.275  | 0.0003  |
| PAICS        | 0.897 | 0.275  | 0.0034  |
| ZRANB2       | 0.911 | 0.275  | 0.015   |
| GTPBP6       | 0.91  | 0.2752 | 0.0055  |
| DNASE1L1     | 0.838 | 0.2753 | 0.0002  |
| MRPS18B      | 0.817 | 0.2753 | 0.0003  |
| TRPM4        | 0.85  | 0.2753 | 0.0007  |
| PPP1R12A     | 0.864 | 0.2753 | 0.001   |
| TMEM33       | 0.84  | 0.2754 | 0.0005  |
| GDPGP1       | 0.794 | 0.2755 | 0.0266  |
| MIR4506      | 0     | 0.2756 | 0.0003  |
| ARMC2        | 0.861 | 0.2756 | 0.0012  |
| RNU6-1263P   | 0     | 0.2757 | 0.0001  |
| KLHDC7B      | 0.88  | 0.2757 | 0.0023  |

|             |       |        |         |
|-------------|-------|--------|---------|
| RNU6ATAC17P | 0     | 0.2758 | 0.0001  |
| TLL7        | 0.862 | 0.2758 | 0.0013  |
| GACAT3      | 0     | 0.2759 | 0.0003  |
| HNRNPA2B1   | 0.85  | 0.2759 | 0.001   |
| LRRC37A     | 0.909 | 0.2759 | 0.0399  |
| CCAR1       | 0.877 | 0.276  | 0.0027  |
| CSTA        | 0.767 | 0.276  | <0.0001 |
| ZNF569      | 0.759 | 0.2764 | 0.0001  |
| SHISA2      | 0.847 | 0.2764 | 0.0046  |
| TRAFD1      | 0.813 | 0.2766 | 0.0002  |
| RNF41       | 0.872 | 0.2766 | 0.0014  |
| VCPIP1      | 0.755 | 0.2766 | <0.0001 |
| STXBP1      | 0.845 | 0.2767 | 0.0004  |
| PLCL1       | 0.871 | 0.2769 | 0.001   |
| C1orf105    | 0.898 | 0.2769 | 0.0033  |
| RPL7L1      | 0.861 | 0.2769 | 0.0041  |
| PPP1R9A     | 0.769 | 0.277  | <0.0001 |
| ACAP2       | 0.819 | 0.2771 | 0.0009  |
| HEATR5A     | 0.889 | 0.2771 | 0.0046  |
| ATP1A1-AS1  | 0.519 | 0.2771 | 0.0104  |
| SSX4        | 0.778 | 0.2771 | 0.0316  |
| SRSF1       | 0.876 | 0.2772 | 0.0206  |
| ZNF579      | 0.827 | 0.2774 | 0.0009  |
| ANKRD45     | 0.884 | 0.2774 | 0.0027  |
| PSMA3       | 0.877 | 0.2775 | 0.0013  |
| FBXO36      | 0.674 | 0.2775 | <0.0001 |
| DIP2B       | 0.911 | 0.2777 | 0.0078  |
| CYTL1       | 0.826 | 0.2777 | <0.0001 |
| CLCN4       | 0.883 | 0.2778 | 0.0009  |
| NPB         | 0.85  | 0.2778 | 0.006   |
| PELP1       | 0.652 | 0.2778 | <0.0001 |
| TAF7        | 0.838 | 0.2779 | 0.0004  |
| GPR39       | 0.851 | 0.2779 | 0.0005  |

|           |       |        |         |
|-----------|-------|--------|---------|
| DEFB132   | 0.847 | 0.2779 | 0.0041  |
| CDK8      | 0.818 | 0.278  | <0.0001 |
| SMPD4P1   | 0.042 | 0.2781 | <0.0001 |
| AP2S1     | 0.861 | 0.2782 | 0.0004  |
| LINC01022 | 0.333 | 0.2783 | 0.0003  |
| PACS1     | 0.862 | 0.2784 | 0.001   |
| CEP95     | 0.838 | 0.2785 | 0.0417  |
| ARHGAP33  | 0.875 | 0.2786 | 0.0125  |
| SYT3      | 0.474 | 0.2786 | <0.0001 |
| RNU6-437P | 0.471 | 0.2787 | 0.0001  |
| TRIP12    | 0.934 | 0.2788 | 0.0172  |
| ZNF670    | 0.779 | 0.2789 | 0.0005  |
| ASPHD1    | 0.791 | 0.279  | <0.0001 |
| POLR2F    | 0.882 | 0.2791 | 0.0019  |
| ISL2      | 0.831 | 0.2793 | 0.0003  |
| RGS14     | 0.857 | 0.2794 | 0.0009  |
| BLACAT1   | 0.192 | 0.2794 | <0.0001 |
| TAP2      | 0.858 | 0.2795 | 0.0006  |
| APTX      | 0.871 | 0.2795 | 0.0007  |
| CNOT2     | 0.871 | 0.2795 | 0.0007  |
| VCY1B     | 0.567 | 0.2796 | 0.0008  |
| MAU2      | 0.897 | 0.2796 | 0.0283  |
| SPOP      | 0.889 | 0.2797 | 0.0021  |
| NOP16     | 0.843 | 0.2797 | 0.0039  |
| RPS3AP2   | 0     | 0.2798 | 0.0003  |
| POFUT1    | 0.84  | 0.2798 | 0.0005  |
| MAST3     | 0.916 | 0.2798 | 0.006   |
| ERC2      | 0.721 | 0.2801 | <0.0001 |
| SUDS3     | 0.874 | 0.2802 | 0.0038  |
| PODXL2    | 0.5   | 0.2802 | <0.0001 |
| RPL7L1P8  | 0.428 | 0.2803 | 0.0001  |
| TRAV10    | 0.388 | 0.2803 | 0.0002  |
| LINC01413 | 0     | 0.2803 | 0.0003  |

|           |       |        |         |
|-----------|-------|--------|---------|
| SLC37A1   | 0.815 | 0.2804 | 0.0002  |
| RPS27P15  | 0.157 | 0.2804 | 0.0003  |
| MCFD2     | 0.892 | 0.2804 | 0.0015  |
| TM2D1     | 0.796 | 0.2804 | <0.0001 |
| MIR6503   | 0     | 0.2806 | 0.0003  |
| EMILIN2   | 0.908 | 0.2806 | 0.0034  |
| KLHL31    | 0.814 | 0.2807 | 0.0006  |
| ARMCX5    | 0.869 | 0.2809 | 0.0006  |
| IL12A     | 0.9   | 0.281  | 0.0017  |
| MGAT4B    | 0.909 | 0.2811 | 0.0036  |
| TRIM8     | 0.648 | 0.2811 | <0.0001 |
| ZNF26     | 0.909 | 0.2812 | 0.0144  |
| SUPT6H    | 0.899 | 0.2813 | 0.0033  |
| ENTPD2    | 0.863 | 0.2814 | 0.0004  |
| COASY     | 0.91  | 0.2814 | 0.003   |
| SOX11     | 0.856 | 0.2815 | 0.0004  |
| RPL35P9   | 0     | 0.2815 | <0.0001 |
| NKX3-2    | 0.751 | 0.2816 | 0.0001  |
| LINC01559 | 0.499 | 0.2816 | 0.0002  |
| TET2-AS1  | 0     | 0.2816 | <0.0001 |
| CIC       | 0.896 | 0.2817 | 0.0019  |
| IP6K2     | 0.903 | 0.2817 | 0.0091  |
| FER       | 0.774 | 0.2818 | <0.0001 |
| SCARB1    | 0.858 | 0.2819 | 0.0006  |
| KANSL2    | 0.768 | 0.2819 | 0.0039  |
| PRPF39    | 0.92  | 0.282  | 0.0135  |
| SIN3A     | 0.693 | 0.282  | <0.0001 |
| PIGB      | 0.906 | 0.2821 | 0.0043  |
| ZNF48     | 0.913 | 0.2821 | 0.0337  |
| SETP14    | 0     | 0.2822 | 0.0002  |
| MYRF      | 0.573 | 0.2822 | 0.0005  |
| ALG10     | 0.818 | 0.2822 | 0.0011  |
| KIAA1107  | 0.845 | 0.2822 | 0.0016  |

|             |       |        |         |
|-------------|-------|--------|---------|
| SWI5        | 0.785 | 0.2822 | 0.0095  |
| TRAPPC6A    | 0.691 | 0.2822 | <0.0001 |
| TBC1D10B    | 0.727 | 0.2822 | <0.0001 |
| LRRC8E      | 0.815 | 0.2822 | <0.0001 |
| PIGH        | 0.857 | 0.2823 | 0.0005  |
| FAM228B     | 0.35  | 0.2823 | <0.0001 |
| TUBB8       | 0.58  | 0.2824 | 0.0003  |
| XPNPEP1     | 0.819 | 0.2825 | 0.0002  |
| PCYT1A      | 0.86  | 0.2825 | 0.0006  |
| NAP1L6      | 0.571 | 0.2825 | 0.0035  |
| CCDC12      | 0.832 | 0.2827 | 0.0003  |
| DEPDC4      | 0.898 | 0.2827 | 0.0042  |
| ARHGEF35    | 0.607 | 0.2832 | 0.0013  |
| HLA-J       | 0.829 | 0.2833 | 0.022   |
| FABP6       | 0.844 | 0.2836 | 0.0001  |
| TOMM7       | 0.914 | 0.2836 | 0.0403  |
| ERICH3-AS1  | 0     | 0.2836 | <0.0001 |
| SCAMP4      | 0.695 | 0.2836 | <0.0001 |
| MTHFSD      | 0.768 | 0.2836 | <0.0001 |
| CTU1        | 0.73  | 0.2838 | 0.0029  |
| CFAP65      | 0.402 | 0.2839 | 0.0001  |
| SERPINE2    | 0.783 | 0.2842 | <0.0001 |
| ZFAND1      | 0.839 | 0.2843 | 0.0003  |
| UBQLN1      | 0.804 | 0.2844 | 0.0003  |
| RAPGEFL1    | 0.888 | 0.2844 | 0.0023  |
| SNORD114-10 | 0.04  | 0.2844 | <0.0001 |
| ULBP2       | 0.743 | 0.2844 | <0.0001 |
| IFNGR2      | 0.894 | 0.2846 | 0.0012  |
| PRAMEF11    | 0.674 | 0.2847 | 0.0015  |
| MTPAP       | 0.786 | 0.2848 | 0.0011  |
| SPOPL       | 0.834 | 0.2848 | 0.0027  |
| COL1A2      | 0.888 | 0.2849 | 0.0008  |
| ARHGAP1     | 0.902 | 0.2849 | 0.0023  |



|               |       |        |         |
|---------------|-------|--------|---------|
| SSX2          | 0.8   | 0.2849 | 0.0053  |
| MLLT10        | 0.922 | 0.2849 | 0.0081  |
| ASB16         | 0.853 | 0.285  | 0.0006  |
| S100PBP       | 0.919 | 0.285  | 0.009   |
| FASTKD1       | 0.865 | 0.2851 | 0.0005  |
| SNHG11        | 0.719 | 0.2851 | 0.0049  |
| PGBD5         | 0.74  | 0.2852 | <0.0001 |
| SIGLEC15      | 0.777 | 0.2852 | <0.0001 |
| HNRNPA3P1     | 0.699 | 0.2853 | 0.0002  |
| ST5           | 0.882 | 0.2853 | 0.0024  |
| LINC01012     | 0.329 | 0.2853 | <0.0001 |
| RPS13         | 0.9   | 0.2854 | 0.0122  |
| PLEKHS1       | 0.645 | 0.2855 | 0.0011  |
| DUSP7         | 0.907 | 0.2855 | 0.0024  |
| CUEDC2        | 0.779 | 0.2855 | <0.0001 |
| TEX11         | 0.86  | 0.2856 | 0.0008  |
| PAFAH1B2      | 0.892 | 0.2856 | 0.0019  |
| HIST1H1A      | 0.936 | 0.2856 | 0.0225  |
| TMEM52B       | 0.448 | 0.2856 | <0.0001 |
| KHDC1         | 0.468 | 0.2858 | <0.0001 |
| CXCL17        | 0.781 | 0.2859 | 0.0002  |
| C6orf222      | 0.842 | 0.2859 | 0.0186  |
| VDR           | 0.859 | 0.286  | 0.0005  |
| CFAP61        | 0.258 | 0.286  | <0.0001 |
| LINC01249     | 0     | 0.2861 | 0.0001  |
| MBNL3         | 0.849 | 0.2863 | 0.0002  |
| GXYLT2        | 0.83  | 0.2865 | 0.0013  |
| NDUFC2-KCTD14 | 0.373 | 0.2867 | 0.008   |
| HMGNI1P30     | 0     | 0.2867 | <0.0001 |
| MARS2         | 0.808 | 0.2868 | 0.0003  |
| NAA38         | 0.868 | 0.2869 | 0.0128  |
| SEC61A2       | 0.926 | 0.2871 | 0.0116  |
| CEP135        | 0.812 | 0.2871 | <0.0001 |

|             |       |        |         |
|-------------|-------|--------|---------|
| GTPBP3      | 0.892 | 0.2873 | 0.0012  |
| ZNF236      | 0.918 | 0.2873 | 0.0084  |
| TPTE2P3     | 0.147 | 0.2874 | 0.0008  |
| RPS15       | 0.81  | 0.2875 | 0.0001  |
| PACSN1      | 0.848 | 0.2875 | 0.0014  |
| FAHD2P1     | 0     | 0.2876 | 0.0002  |
| PDIA2       | 0.859 | 0.2876 | 0.0004  |
| PI4K2A      | 0.884 | 0.2876 | 0.0032  |
| TREML3P     | 0.547 | 0.2877 | 0.0014  |
| LSP1P3      | 0.143 | 0.2877 | <0.0001 |
| MIR3136     | 0     | 0.2878 | <0.0001 |
| MS4A10      | 0.447 | 0.2878 | <0.0001 |
| LYG2        | 0.76  | 0.2878 | <0.0001 |
| RNU6ATAC39P | 0.442 | 0.2879 | 0.0002  |
| POMT2       | 0.899 | 0.2879 | 0.0033  |
| RHOQP3      | 0.215 | 0.288  | 0.0002  |
| HMGN2P46    | 0.762 | 0.2881 | 0.0149  |
| SSX3        | 0.84  | 0.2883 | 0.0005  |
| ZFX         | 0.872 | 0.2883 | 0.0007  |
| GNG5        | 0.884 | 0.2883 | 0.0007  |
| WDR24       | 0.862 | 0.2883 | 0.0018  |
| ATG14       | 0.823 | 0.2883 | 0.0039  |
| PABPN1      | 0.943 | 0.2884 | 0.0241  |
| ARHGEF5     | 0.877 | 0.2885 | 0.0004  |
| PIK3CD-AS1  | 0.201 | 0.2887 | 0.0001  |
| CAB39       | 0.846 | 0.2887 | 0.0001  |
| OXTR        | 0.864 | 0.2887 | 0.0005  |
| FAM168A     | 0.863 | 0.2887 | 0.002   |
| HULC        | 0.711 | 0.2887 | 0.0497  |
| ZNF697      | 0.573 | 0.2887 | <0.0001 |
| PCDHB3      | 0.682 | 0.2888 | <0.0001 |
| SNX13       | 0.814 | 0.2889 | 0.0001  |
| HDAC10      | 0.936 | 0.2889 | 0.0179  |

|            |       |        |         |
|------------|-------|--------|---------|
| RNF224     | 0.533 | 0.2889 | 0.0282  |
| SPHK1      | 0.822 | 0.289  | 0.0001  |
| LGR5       | 0.796 | 0.289  | <0.0001 |
| BCL7C      | 0.906 | 0.2891 | 0.0025  |
| PLS1       | 0.888 | 0.2892 | 0.0015  |
| ARHGEF3    | 0.873 | 0.2893 | 0.0004  |
| LYPD3      | 0.883 | 0.2893 | 0.0005  |
| C12orf43   | 0.788 | 0.2893 | <0.0001 |
| RNU1-72P   | 0.094 | 0.2894 | <0.0001 |
| TMEM106B   | 0.891 | 0.2895 | 0.0024  |
| DCSTAMP    | 0.544 | 0.2896 | 0.0001  |
| LIN52      | 0.736 | 0.2897 | <0.0001 |
| HTT        | 0.794 | 0.2898 | 0.0002  |
| CXCL11     | 0.873 | 0.2899 | 0.0006  |
| WDR1       | 0.911 | 0.2899 | 0.0042  |
| BAZ2A      | 0.917 | 0.2899 | 0.0045  |
| MAMSTR     | 0.898 | 0.2899 | 0.0231  |
| TAAR3P     | 0.223 | 0.2901 | 0.0001  |
| RNU2-29P   | 0     | 0.2901 | <0.0001 |
| LOC643387  | 0.464 | 0.2901 | <0.0001 |
| MANSC1     | 0.795 | 0.2901 | <0.0001 |
| MIR6738    | 0     | 0.2903 | 0.0002  |
| CHMP1A     | 0.859 | 0.2903 | 0.0003  |
| C4orf48    | 0.832 | 0.2903 | 0.0054  |
| ZNF404     | 0.802 | 0.2904 | 0.0003  |
| CDC42BPA   | 0.894 | 0.2905 | 0.0009  |
| ZNF841     | 0.895 | 0.2905 | 0.0409  |
| GTF3C4     | 0.762 | 0.2905 | <0.0001 |
| DKK2       | 0.873 | 0.2906 | 0.0004  |
| SYF2       | 0.885 | 0.2906 | 0.0013  |
| PPARD      | 0.9   | 0.2906 | 0.0029  |
| LIMS1      | 0.929 | 0.2906 | 0.0066  |
| SLC6A1-AS1 | 0.399 | 0.2907 | <0.0001 |

|              |       |        |         |
|--------------|-------|--------|---------|
| TYK2         | 0.907 | 0.2908 | 0.0035  |
| LINC00327    | 0.39  | 0.2908 | <0.0001 |
| GALK1        | 0.839 | 0.2908 | <0.0001 |
| LOC101926944 | 0     | 0.2909 | <0.0001 |
| PCDHB11      | 0.86  | 0.2911 | 0.0004  |
| HAPLN1       | 0.865 | 0.2912 | 0.0002  |
| LOC101927164 | 0     | 0.2912 | <0.0001 |
| CSTF1        | 0.904 | 0.2913 | 0.0014  |
| RN7SL205P    | 0     | 0.2916 | <0.0001 |
| ZRANB3       | 0.794 | 0.2917 | 0.0001  |
| GM2AP2       | 0     | 0.2917 | 0.0002  |
| GPX8         | 0.848 | 0.2917 | 0.0016  |
| CNR1         | 0.842 | 0.2917 | <0.0001 |
| SUMF1        | 0.82  | 0.2918 | 0.0003  |
| MFSD1        | 0.88  | 0.2918 | 0.0007  |
| LPCAT2       | 0.846 | 0.2918 | 0.001   |
| STK17A       | 0.919 | 0.2921 | 0.0064  |
| IMP4         | 0.863 | 0.2922 | 0.0003  |
| CNFN         | 0.82  | 0.2923 | 0.0001  |
| PASK         | 0.898 | 0.2923 | 0.0021  |
| BTF3         | 0.922 | 0.2923 | 0.0041  |
| THAP2        | 0.816 | 0.2924 | 0.0004  |
| STARD9       | 0.906 | 0.2924 | 0.0103  |
| TERF2        | 0.814 | 0.2924 | <0.0001 |
| GNAS         | 0.88  | 0.2925 | 0.0004  |
| GAGE12I      | 0.609 | 0.2925 | 0.0154  |
| GPATCH11     | 0.492 | 0.2926 | <0.0001 |
| RNU4-39P     | 0     | 0.2928 | <0.0001 |
| CCL18        | 0.867 | 0.2929 | 0.0004  |
| FABP4        | 0.703 | 0.293  | <0.0001 |
| JOSD2        | 0.799 | 0.293  | <0.0001 |
| HOXA5        | 0.826 | 0.293  | <0.0001 |
| KCNJ6        | 0.805 | 0.2932 | <0.0001 |

|           |       |        |         |
|-----------|-------|--------|---------|
| LINC01297 | 0     | 0.2933 | 0.0002  |
| ACTR8     | 0.872 | 0.2933 | 0.0005  |
| OPN3      | 0.859 | 0.2933 | 0.0013  |
| NOS2      | 0.87  | 0.2933 | 0.0054  |
| PKIA-AS1  | 0     | 0.2934 | 0.0002  |
| SLC7A1    | 0.828 | 0.2934 | <0.0001 |
| PDE12     | 0.781 | 0.2935 | 0.0003  |
| CACNG4    | 0.907 | 0.2935 | 0.002   |
| UPK1A     | 0.809 | 0.2935 | <0.0001 |
| LGALS3    | 0.916 | 0.2936 | 0.0026  |
| ZNF425    | 0.748 | 0.2936 | <0.0001 |
| PDZD2     | 0.673 | 0.2937 | <0.0001 |
| ZNF296    | 0.827 | 0.2939 | 0.002   |
| OPHN1     | 0.902 | 0.2939 | 0.0034  |
| STX18     | 0.799 | 0.2939 | <0.0001 |
| ZNF720    | 0.829 | 0.294  | 0.0021  |
| IRF2BP1   | 0.721 | 0.294  | <0.0001 |
| WDR47     | 0.866 | 0.2941 | 0.0007  |
| BMF       | 0.878 | 0.2941 | 0.0011  |
| HSP90AB5P | 0.785 | 0.2941 | 0.0472  |
| RAB4B     | 0.844 | 0.2943 | 0.002   |
| UBA5      | 0.899 | 0.2944 | 0.0116  |
| FYCO1     | 0.823 | 0.2944 | <0.0001 |
| C6orf52   | 0.53  | 0.2945 | <0.0001 |
| FXYD3     | 0.834 | 0.2945 | <0.0001 |
| PRAMEF4   | 0.666 | 0.2946 | 0.0023  |
| SPARC     | 0.919 | 0.2946 | 0.0051  |
| COX5B     | 0.829 | 0.2946 | <0.0001 |
| ZNF233    | 0.662 | 0.2947 | <0.0001 |
| MIR8064   | 0.012 | 0.2949 | 0.0002  |
| SMC6      | 0.88  | 0.2949 | 0.0012  |
| C12orf57  | 0.874 | 0.2949 | 0.0015  |
| LSG1      | 0.895 | 0.2951 | 0.0012  |

|              |       |        |         |
|--------------|-------|--------|---------|
| ZNF676       | 0.596 | 0.2951 | <0.0001 |
| GAPDHP20     | 0.087 | 0.2952 | 0.0001  |
| KCNF1        | 0.777 | 0.2952 | <0.0001 |
| SAMD13       | 0.87  | 0.2953 | 0.004   |
| MIR548C      | 0.363 | 0.2953 | 0.0098  |
| ELP6         | 0.645 | 0.2954 | 0.001   |
| ZNF345       | 0.934 | 0.2954 | 0.0147  |
| RPL19P13     | 0     | 0.2954 | <0.0001 |
| LOC100129603 | 0.212 | 0.2954 | <0.0001 |
| SNRNP25      | 0.678 | 0.2954 | <0.0001 |
| LMBR1        | 0.808 | 0.2954 | <0.0001 |
| TLE6         | 0.802 | 0.2955 | <0.0001 |
| MRPL27       | 0.83  | 0.2956 | 0.0005  |
| RPL24        | 0.891 | 0.2956 | 0.0024  |
| EXT2         | 0.903 | 0.2958 | 0.0011  |
| DDX31        | 0.827 | 0.2958 | <0.0001 |
| SHISA5       | 0.678 | 0.2959 | <0.0001 |
| RN7SL477P    | 0.33  | 0.296  | <0.0001 |
| SLC25A12     | 0.754 | 0.296  | <0.0001 |
| NPR2         | 0.812 | 0.296  | <0.0001 |
| MAPK11       | 0.887 | 0.2961 | 0.0006  |
| WDR43        | 0.89  | 0.2961 | 0.0024  |
| OR8A1        | 0.573 | 0.2962 | <0.0001 |
| RABGGTA      | 0.823 | 0.2962 | <0.0001 |
| DPY19L2P2    | 0.836 | 0.2963 | 0.0004  |
| NLRP11       | 0.561 | 0.2963 | <0.0001 |
| TBC1D25      | 0.762 | 0.2963 | <0.0001 |
| AFAP1        | 0.877 | 0.2966 | 0.0005  |
| PRDM12       | 0.89  | 0.2966 | 0.0018  |
| DUOXA2       | 0.686 | 0.2968 | <0.0001 |
| ZNF710       | 0.673 | 0.2969 | <0.0001 |
| HNRNPA1P25   | 0     | 0.297  | 0.0001  |
| LOC650226    | 0     | 0.297  | 0.0059  |

|             |       |        |         |
|-------------|-------|--------|---------|
| ATP6V0E1P3  | 0.227 | 0.2971 | 0.0001  |
| SLC30A3     | 0.839 | 0.2972 | 0.0001  |
| PAX6        | 0.883 | 0.2972 | 0.0008  |
| HAUS7       | 0.802 | 0.2972 | 0.0016  |
| CEBPZ       | 0.932 | 0.2972 | 0.0086  |
| ALX3        | 0.876 | 0.2973 | 0.0003  |
| RN7SL583P   | 0     | 0.2974 | <0.0001 |
| MAP3K13     | 0.794 | 0.2974 | <0.0001 |
| ATP2B4      | 0.899 | 0.2975 | 0.0008  |
| COX19       | 0.875 | 0.2977 | 0.002   |
| RNU6ATAC14P | 0     | 0.2978 | 0.0001  |
| BRINP3      | 0.44  | 0.2978 | <0.0001 |
| DAND5       | 0.849 | 0.2979 | 0.0003  |
| ZCCHC10     | 0.823 | 0.2979 | <0.0001 |
| ZNF587      | 0.918 | 0.298  | 0.0058  |
| FAM111A     | 0.917 | 0.2981 | 0.0032  |
| PROCA1      | 0.86  | 0.2982 | 0.0029  |
| HDAC3       | 0.832 | 0.2982 | <0.0001 |
| PHLDB3      | 0.818 | 0.2983 | 0.0003  |
| RPL10L      | 0.62  | 0.2984 | <0.0001 |
| BBS7        | 0.836 | 0.2984 | <0.0001 |
| ZNF239      | 0.803 | 0.2985 | <0.0001 |
| BNIPL       | 0.859 | 0.2986 | 0.0004  |
| ZNF302      | 0.911 | 0.2986 | 0.004   |
| KLHL13      | 0.741 | 0.2988 | <0.0001 |
| ZNF729      | 0.335 | 0.2989 | <0.0001 |
| HNRNPA1P15  | 0.172 | 0.299  | 0.0001  |
| GOLGA2      | 0.91  | 0.299  | 0.0015  |
| POLM        | 0.94  | 0.2991 | 0.0176  |
| ANKRD26P1   | 0.233 | 0.2991 | <0.0001 |
| SLC2A6      | 0.752 | 0.2991 | <0.0001 |
| QPCT        | 0.866 | 0.2992 | 0.0003  |
| CRIPAK      | 0.842 | 0.2992 | 0.0005  |

|           |       |        |         |
|-----------|-------|--------|---------|
| FLJ30901  | 0     | 0.2992 | 0.0106  |
| EARS2     | 0.74  | 0.2992 | <0.0001 |
| MSN       | 0.848 | 0.2993 | 0.0002  |
| GCN1      | 0.293 | 0.2993 | <0.0001 |
| ROR1      | 0.815 | 0.2993 | <0.0001 |
| TMEM108   | 0.83  | 0.2994 | 0.0004  |
| EEPD1     | 0.841 | 0.2995 | 0.0006  |
| SNORD31   | 0.51  | 0.2995 | 0.0312  |
| THRA      | 0.911 | 0.2996 | 0.0029  |
| GLB1L3    | 0.624 | 0.2996 | <0.0001 |
| DNAJC30   | 0.678 | 0.2997 | <0.0001 |
| PPP3CB    | 0.885 | 0.2999 | 0.0008  |
| ZNF713    | 0.88  | 0.2999 | 0.0024  |
| LRRC46    | 0.615 | 0.2999 | <0.0001 |
| SLC46A1   | 0.835 | 0.3    | 0.0004  |
| CT47B1    | 0.325 | 0.3003 | <0.0001 |
| MOCS3     | 0.848 | 0.3004 | 0.0003  |
| DNA2      | 0.902 | 0.3005 | 0.0048  |
| PBX2      | 0.819 | 0.3008 | <0.0001 |
| LOC340268 | 0.483 | 0.3009 | 0.0025  |
| CHCHD2P5  | 0     | 0.301  | <0.0001 |
| HIRIP3    | 0.791 | 0.301  | <0.0001 |
| OR5H6     | 0.599 | 0.3011 | 0.0001  |
| GPALPP1   | 0.658 | 0.3013 | 0.0031  |
| UNC93B6   | 0     | 0.3013 | <0.0001 |
| PNCK      | 0.733 | 0.3013 | <0.0001 |
| USP49     | 0.862 | 0.3014 | 0.0009  |
| TAF8      | 0.617 | 0.3014 | <0.0001 |
| SNX30     | 0.723 | 0.3015 | <0.0001 |
| SIGMAR1   | 0.774 | 0.3016 | 0.0003  |
| MIR7854   | 0     | 0.3017 | 0.0001  |
| ABCB5     | 0.778 | 0.3019 | <0.0001 |
| HLA-A     | 0.921 | 0.3021 | 0.0059  |



|              |       |        |         |
|--------------|-------|--------|---------|
| BET1         | 0.837 | 0.3023 | <0.0001 |
| ZZZ3         | 0.835 | 0.3024 | 0.0003  |
| RHOXF2       | 0.237 | 0.3024 | <0.0001 |
| CSMD2        | 0.865 | 0.3025 | 0.0004  |
| ZNF431       | 0.733 | 0.3025 | <0.0001 |
| IRF5         | 0.868 | 0.3026 | 0.0001  |
| DNAH11       | 0.845 | 0.3026 | 0.0005  |
| LOC100507507 | 0.175 | 0.3027 | <0.0001 |
| COG4         | 0.842 | 0.3027 | <0.0001 |
| ZBTB8OS      | 0.845 | 0.3028 | 0.0008  |
| EML2         | 0.858 | 0.303  | 0.0002  |
| F2RL3        | 0.889 | 0.303  | 0.0008  |
| DSTNP4       | 0     | 0.303  | <0.0001 |
| SHOX2        | 0.887 | 0.3031 | 0.0008  |
| UBA3         | 0.818 | 0.3032 | 0.0004  |
| RPL9         | 0.881 | 0.3032 | 0.0016  |
| TCEAL9       | 0.035 | 0.3033 | <0.0001 |
| ADAM22       | 0.881 | 0.3034 | 0.0004  |
| TMEM246      | 0.679 | 0.3034 | 0.0067  |
| CROCCP5      | 0     | 0.3034 | <0.0001 |
| CHODL        | 0.451 | 0.3035 | <0.0001 |
| ZNF589       | 0.901 | 0.3036 | 0.002   |
| RP9P         | 0.834 | 0.3037 | 0.0185  |
| SOCS4        | 0.878 | 0.3038 | 0.0017  |
| GPR89B       | 0.806 | 0.3038 | 0.0032  |
| IQCH         | 0.729 | 0.3038 | <0.0001 |
| GPR108       | 0.738 | 0.3038 | <0.0001 |
| NSA2         | 0.889 | 0.3039 | 0.0089  |
| CCL13        | 0.928 | 0.304  | 0.0035  |
| CEP192       | 0.913 | 0.3041 | 0.0023  |
| ZFH4-AS1     | 0.749 | 0.3041 | 0.022   |
| CUZD1        | 0.848 | 0.3042 | 0.0001  |
| TM4SF1       | 0.921 | 0.3043 | 0.0042  |

|            |       |        |         |
|------------|-------|--------|---------|
| NSMCE1     | 0.828 | 0.3045 | 0.0003  |
| ATP9B      | 0.702 | 0.3047 | <0.0001 |
| PKIA       | 0.783 | 0.3047 | <0.0001 |
| RPS16P9    | 0     | 0.3048 | <0.0001 |
| CHEK2P2    | 0.102 | 0.3049 | <0.0001 |
| FAM57A     | 0.807 | 0.305  | <0.0001 |
| UBE2H      | 0.862 | 0.3051 | 0.0003  |
| TUBGCP4    | 0.725 | 0.3051 | <0.0001 |
| DNAH17-AS1 | 0.764 | 0.3052 | 0.048   |
| MIR5590    | 0     | 0.3052 | <0.0001 |
| SCX        | 0.285 | 0.3052 | <0.0001 |
| ZNF580     | 0.786 | 0.3052 | <0.0001 |
| SLC52A3    | 0.867 | 0.3053 | 0.0373  |
| NCOR2      | 0.863 | 0.3054 | 0.0003  |
| TBL3       | 0.868 | 0.3054 | 0.0003  |
| LINC00581  | 0.035 | 0.3054 | <0.0001 |
| CCZ1B      | 0.78  | 0.3055 | 0.0055  |
| AP5S1      | 0.807 | 0.3055 | 0.0088  |
| RAMP1      | 0.848 | 0.3056 | 0.0001  |
| ANKRD26    | 0.853 | 0.3056 | <0.0001 |
| ASXL1      | 0.911 | 0.3057 | 0.0017  |
| CALCR      | 0.819 | 0.3057 | <0.0001 |
| ADAT1      | 0.768 | 0.3058 | <0.0001 |
| DLK1       | 0.803 | 0.3058 | <0.0001 |
| YY1        | 0.907 | 0.3059 | 0.0022  |
| RAVER2     | 0.812 | 0.3059 | <0.0001 |
| CYB5R3     | 0.891 | 0.306  | 0.0005  |
| TNFRSF25   | 0.864 | 0.3061 | 0.0003  |
| DEF8       | 0.924 | 0.3062 | 0.0048  |
| DLG1       | 0.916 | 0.3063 | 0.0015  |
| MPI        | 0.826 | 0.3064 | <0.0001 |
| ZNF445     | 0.946 | 0.3065 | 0.0311  |
| MAN2B1     | 0.853 | 0.3065 | <0.0001 |

|              |       |        |         |
|--------------|-------|--------|---------|
| TMEM181      | 0.833 | 0.3066 | 0.0005  |
| ARSK         | 0.727 | 0.3067 | <0.0001 |
| SARS         | 0.911 | 0.3069 | 0.005   |
| ZNF599       | 0.796 | 0.307  | 0.0002  |
| ALG9         | 0.944 | 0.307  | 0.0128  |
| LOC101929464 | 0     | 0.3072 | <0.0001 |
| WDR73        | 0.863 | 0.3073 | 0.0004  |
| RN7SL709P    | 0     | 0.3073 | <0.0001 |
| SNRNP35      | 0.834 | 0.3074 | 0.0013  |
| C1QL4        | 0.707 | 0.3074 | <0.0001 |
| OCA2         | 0.787 | 0.3074 | <0.0001 |
| GABPB2       | 0.907 | 0.3075 | 0.0012  |
| SNX18P7      | 0     | 0.3075 | <0.0001 |
| TSPAN3       | 0.84  | 0.3075 | <0.0001 |
| ANKRD30BP2   | 0.547 | 0.3076 | 0.0004  |
| NOC2L        | 0.847 | 0.3077 | 0.0002  |
| PSMD6        | 0.903 | 0.3077 | 0.0018  |
| TYRP1        | 0.835 | 0.3077 | <0.0001 |
| C3orf70      | 0.819 | 0.3078 | 0.0006  |
| PLEC         | 0.78  | 0.3079 | 0.0003  |
| HIST3H2A     | 0.795 | 0.3079 | <0.0001 |
| SLC10A3      | 0.805 | 0.3079 | <0.0001 |
| ESYT3        | 0.856 | 0.3081 | 0.0049  |
| ZNF480       | 0.829 | 0.3081 | <0.0001 |
| C8orf37      | 0.883 | 0.3083 | 0.0013  |
| GAGE2A       | 0.143 | 0.3083 | <0.0001 |
| PRKG1-AS1    | 0.463 | 0.3083 | <0.0001 |
| BTBD2        | 0.692 | 0.3084 | <0.0001 |
| GABRA2       | 0.834 | 0.3084 | <0.0001 |
| LSM5         | 0.836 | 0.3085 | <0.0001 |
| ATAT1        | 0.868 | 0.3086 | 0.0075  |
| SLC7A10      | 0.651 | 0.3086 | <0.0001 |
| TOR2A        | 0.747 | 0.3088 | <0.0001 |

|              |       |        |         |
|--------------|-------|--------|---------|
| ATRX         | 0.898 | 0.3089 | 0.0005  |
| ZNF354A      | 0.786 | 0.3089 | <0.0001 |
| LOC100129455 | 0     | 0.309  | <0.0001 |
| TTC32        | 0.806 | 0.3093 | 0.0001  |
| GNA11        | 0.841 | 0.3093 | <0.0001 |
| FAM120A      | 0.881 | 0.3094 | 0.0003  |
| RBM39        | 0.945 | 0.3095 | 0.0149  |
| SGPL1        | 0.893 | 0.3096 | 0.0013  |
| GALNT18      | 0.504 | 0.3098 | 0.0002  |
| PUM2         | 0.869 | 0.3099 | 0.0004  |
| FOXD4        | 0.741 | 0.3101 | 0.0001  |
| LRPAP1       | 0.88  | 0.3101 | 0.0002  |
| YARS         | 0.853 | 0.3101 | 0.0005  |
| MEX3D        | 0.875 | 0.3102 | 0.0005  |
| KAT5         | 0.905 | 0.3102 | 0.0044  |
| IFT20        | 0.858 | 0.3104 | 0.0002  |
| HPS1         | 0.901 | 0.3105 | 0.0007  |
| GHRHR        | 0.843 | 0.3105 | <0.0001 |
| FMO8P        | 0.462 | 0.3106 | <0.0001 |
| BHLHB9       | 0.724 | 0.3106 | <0.0001 |
| CEP76        | 0.84  | 0.3106 | <0.0001 |
| MAP2K5       | 0.893 | 0.3107 | 0.0004  |
| SCARNA15     | 0.703 | 0.3107 | 0.0011  |
| ZMIZ1        | 0.836 | 0.3108 | <0.0001 |
| S100A2       | 0.829 | 0.3109 | <0.0001 |
| ZBTB39       | 0.902 | 0.311  | 0.0019  |
| TSPAN15      | 0.849 | 0.3112 | 0.0002  |
| ZC3H4        | 0.826 | 0.3112 | 0.0005  |
| SERBP1       | 0.883 | 0.3113 | 0.0006  |
| ZDHHC5       | 0.846 | 0.3113 | 0.001   |
| SLC35D2      | 0.833 | 0.3113 | <0.0001 |
| VCX3B        | 0.793 | 0.3114 | 0.013   |
| NAV1         | 0.857 | 0.3115 | 0.0003  |

|                |       |        |         |
|----------------|-------|--------|---------|
| FMNL3          | 0.829 | 0.3116 | <0.0001 |
| VASH1          | 0.835 | 0.3116 | <0.0001 |
| RAB1B          | 0.899 | 0.3117 | 0.0028  |
| DDX18          | 0.852 | 0.3117 | <0.0001 |
| NKRF           | 0.838 | 0.3118 | <0.0001 |
| CT47A10        | 0     | 0.312  | 0.0045  |
| CDH12          | 0.798 | 0.312  | <0.0001 |
| LCTL           | 0.909 | 0.3122 | 0.0034  |
| AK8            | 0.845 | 0.3122 | 0.007   |
| CASC16         | 0.731 | 0.3122 | 0.0264  |
| GABPB1         | 0.827 | 0.3123 | 0.0002  |
| SURF6          | 0.845 | 0.3123 | 0.0004  |
| ZNF17          | 0.846 | 0.3124 | 0.0005  |
| PAX8           | 0.914 | 0.3124 | 0.0023  |
| ARMCX5-GPRASP2 | 0     | 0.3124 | <0.0001 |
| MIR5089        | 0.001 | 0.3124 | <0.0001 |
| IHH            | 0.896 | 0.3125 | 0.0004  |
| ENO1-AS1       | 0.73  | 0.3126 | 0.0134  |
| SCARNA3        | 0.759 | 0.3126 | 0.0141  |
| DALRD3         | 0.871 | 0.3127 | 0.0003  |
| FBXO10         | 0.873 | 0.3127 | 0.0006  |
| ANO4           | 0.67  | 0.3127 | <0.0001 |
| HOXA9          | 0.844 | 0.3128 | 0.0001  |
| SCGB2A1        | 0.843 | 0.3128 | 0.0002  |
| C2orf49        | 0.919 | 0.3128 | 0.0029  |
| SERTAD4        | 0.63  | 0.3128 | <0.0001 |
| AGAP3          | 0.817 | 0.3129 | 0.0002  |
| ZNF573         | 0.843 | 0.3129 | <0.0001 |
| LTBP2          | 0.861 | 0.313  | <0.0001 |
| EEF2K          | 0.834 | 0.3131 | 0.0004  |
| MRPL43         | 0.866 | 0.3131 | 0.0011  |
| ZDHHC3         | 0.849 | 0.3134 | 0.0001  |
| DEFA9P         | 0.293 | 0.3134 | <0.0001 |

|              |       |        |         |
|--------------|-------|--------|---------|
| NOC4L        | 0.862 | 0.3135 | 0.0003  |
| SPOCD1       | 0.792 | 0.3135 | <0.0001 |
| ZNF324       | 0.886 | 0.3137 | 0.0008  |
| HIST1H1T     | 0.894 | 0.3137 | 0.001   |
| MARK2        | 0.879 | 0.3138 | 0.0001  |
| RANBP1       | 0.862 | 0.3138 | 0.0006  |
| ZBTB17       | 0.904 | 0.3138 | 0.0013  |
| RPL41P2      | 0.241 | 0.3139 | <0.0001 |
| LOC101927272 | 0     | 0.314  | <0.0001 |
| ARHGEF38-IT1 | 0     | 0.3141 | <0.0001 |
| SUPV3L1      | 0.82  | 0.3142 | <0.0001 |
| MOGS         | 0.853 | 0.3143 | 0.0016  |
| ACER3        | 0.825 | 0.3144 | 0.0004  |
| TLR5         | 0.684 | 0.3144 | <0.0001 |
| NRSN2        | 0.803 | 0.3144 | <0.0001 |
| FLT1         | 0.848 | 0.3144 | <0.0001 |
| CTNNBIP1     | 0.901 | 0.3145 | 0.0006  |
| TOX3         | 0.48  | 0.3145 | <0.0001 |
| SH3GLB2      | 0.767 | 0.3146 | <0.0001 |
| IKBKG        | 0.859 | 0.3147 | 0.0001  |
| ZNF620       | 0.743 | 0.3147 | <0.0001 |
| FOXF2        | 0.81  | 0.3148 | <0.0001 |
| NR1H2        | 0.872 | 0.3149 | 0.0003  |
| ZNF571-AS1   | 0.314 | 0.3149 | <0.0001 |
| HSPG2        | 0.835 | 0.3149 | <0.0001 |
| NPIPA3       | 0.48  | 0.3151 | <0.0001 |
| DHX40        | 0.84  | 0.3151 | <0.0001 |
| MAT2A        | 0.918 | 0.3154 | 0.0013  |
| MORC4        | 0.792 | 0.3154 | <0.0001 |
| B4GALNT2     | 0.822 | 0.3154 | <0.0001 |
| ITGB4        | 0.869 | 0.3155 | <0.0001 |
| ABCF3        | 0.897 | 0.3156 | 0.0005  |
| MRPL3        | 0.89  | 0.3156 | 0.0009  |

|              |       |        |         |
|--------------|-------|--------|---------|
| TAF15        | 0.919 | 0.3156 | 0.0038  |
| SRRT         | 0.91  | 0.3156 | 0.0139  |
| IGF2R        | 0.889 | 0.3157 | 0.0002  |
| BLOC1S1      | 0.9   | 0.3158 | 0.0009  |
| UNKL         | 0.916 | 0.3158 | 0.005   |
| PPFIA4       | 0.761 | 0.3158 | <0.0001 |
| PCMTD2       | 0.89  | 0.3159 | 0.0008  |
| CNBD2        | 0.874 | 0.3159 | 0.0391  |
| PIN4         | 0.785 | 0.3159 | <0.0001 |
| PEX19        | 0.865 | 0.316  | 0.0002  |
| ZNF621       | 0.936 | 0.3161 | 0.0167  |
| LOC101927365 | 0     | 0.3161 | <0.0001 |
| OLR1         | 0.796 | 0.3161 | <0.0001 |
| MIR6864      | 0     | 0.3162 | <0.0001 |
| LOC93622     | 0.761 | 0.3163 | 0.0012  |
| CASC19       | 0.13  | 0.3163 | <0.0001 |
| HEXA-AS1     | 0.68  | 0.3164 | 0.0016  |
| NCOA3        | 0.882 | 0.3166 | 0.0004  |
| ABHD11       | 0.815 | 0.3166 | <0.0001 |
| CNN3         | 0.868 | 0.3166 | <0.0001 |
| HNRNPH2      | 0.837 | 0.3167 | 0.0011  |
| DMWD         | 0.914 | 0.3168 | 0.0011  |
| P2RY8        | 0.928 | 0.3168 | 0.0144  |
| ITGB5        | 0.857 | 0.3168 | <0.0001 |
| CHERP        | 0.859 | 0.3168 | <0.0001 |
| PSIP1        | 0.87  | 0.3169 | 0.0002  |
| CNKSR2       | 0.892 | 0.3169 | 0.0004  |
| NUDT19       | 0.774 | 0.3169 | <0.0001 |
| GPR1-AS      | 0     | 0.3171 | <0.0001 |
| SCFD1        | 0.805 | 0.3171 | <0.0001 |
| CD248        | 0.878 | 0.3172 | 0.0002  |
| ATXN10       | 0.893 | 0.3172 | 0.0003  |
| SCHLAP1      | 0     | 0.3172 | <0.0001 |

|              |       |        |         |
|--------------|-------|--------|---------|
| TMPRSS15     | 0.35  | 0.3172 | <0.0001 |
| ANKFN1       | 0.587 | 0.3172 | <0.0001 |
| ZNF485       | 0.742 | 0.3172 | <0.0001 |
| LOC100507516 | 0.187 | 0.3173 | <0.0001 |
| TMOD2        | 0.74  | 0.3173 | <0.0001 |
| TTC30A       | 0.822 | 0.3173 | <0.0001 |
| KLHL29       | 0.848 | 0.3175 | 0.0002  |
| TAF9B        | 0.906 | 0.3175 | 0.0022  |
| CORIN        | 0.785 | 0.3176 | <0.0001 |
| FUT1         | 0.859 | 0.3176 | <0.0001 |
| SLC35C2      | 0.873 | 0.3177 | 0.0003  |
| LINC01425    | 0     | 0.3177 | <0.0001 |
| KIDINS220    | 0.93  | 0.3178 | 0.0071  |
| ZNF124       | 0.797 | 0.3178 | <0.0001 |
| AP1B1        | 0.842 | 0.3178 | <0.0001 |
| PSAP         | 0.898 | 0.3179 | 0.0009  |
| PAK2         | 0.91  | 0.318  | 0.0019  |
| SSX7         | 0.693 | 0.3181 | 0.0001  |
| SYNCRIP      | 0.916 | 0.3181 | 0.0022  |
| HTATSF1P2    | 0.489 | 0.3181 | <0.0001 |
| FNDC3B       | 0.894 | 0.3182 | 0.0008  |
| RAD17        | 0.862 | 0.3183 | 0.0002  |
| PCDHB13      | 0.627 | 0.3183 | <0.0001 |
| CT45A10      | 0.313 | 0.3184 | <0.0001 |
| RNU6ATAC41P  | 0.355 | 0.3185 | 0.0426  |
| USP22        | 0.826 | 0.3186 | <0.0001 |
| MYBPHL       | 0.746 | 0.3188 | 0.0005  |
| FBN3         | 0.662 | 0.3188 | <0.0001 |
| PHEX         | 0.813 | 0.3191 | <0.0001 |
| TPI1P2       | 0.531 | 0.3192 | 0.0021  |
| ZNF12        | 0.915 | 0.3192 | 0.0026  |
| ARMC8        | 0.934 | 0.3194 | 0.0031  |
| TCAF2P1      | 0.186 | 0.3196 | <0.0001 |



|             |       |        |         |
|-------------|-------|--------|---------|
| ALG14       | 0.859 | 0.3197 | 0.0002  |
| TBPL1       | 0.738 | 0.3197 | <0.0001 |
| LINC01282   | 0.203 | 0.3199 | <0.0001 |
| BCL9L       | 0.839 | 0.32   | <0.0001 |
| SLC1A5      | 0.86  | 0.3201 | 0.0001  |
| FGFBP3      | 0.861 | 0.3201 | 0.0002  |
| VCX3A       | 0.81  | 0.3202 | 0.0029  |
| PIAS1       | 0.853 | 0.3202 | <0.0001 |
| LOC374443   | 0.85  | 0.3203 | 0.0291  |
| MOB1A       | 0.868 | 0.3204 | 0.0108  |
| POLDIP3     | 0.867 | 0.3205 | 0.0002  |
| CDAN1       | 0.92  | 0.3206 | 0.004   |
| MRPS34      | 0.749 | 0.3206 | <0.0001 |
| CYP27C1     | 0.795 | 0.3206 | <0.0001 |
| LOC728452   | 0     | 0.3207 | 0.0015  |
| LINC00638   | 0.615 | 0.3207 | 0.0019  |
| PHF12       | 0.931 | 0.3208 | 0.0121  |
| MNX1-AS1    | 0.733 | 0.3208 | 0.025   |
| GNGT1       | 0.816 | 0.3208 | <0.0001 |
| ZDHHC13     | 0.888 | 0.3209 | 0.0006  |
| HS2ST1      | 0.908 | 0.3209 | 0.001   |
| RNU1-61P    | 0     | 0.321  | <0.0001 |
| PRICKLE4    | 0.897 | 0.3211 | 0.0191  |
| IGHV3-47    | 0     | 0.3211 | <0.0001 |
| ZNF414      | 0.835 | 0.3215 | 0.0002  |
| ANO6        | 0.849 | 0.3216 | 0.0005  |
| MAGED1      | 0.81  | 0.3216 | <0.0001 |
| SETD2       | 0.892 | 0.3218 | 0.0008  |
| CCDC183-AS1 | 0     | 0.3219 | <0.0001 |
| TPI1        | 0.724 | 0.3219 | <0.0001 |
| CRLF3       | 0.865 | 0.3219 | <0.0001 |
| SLC26A7     | 0.809 | 0.3222 | <0.0001 |
| THAP10      | 0.666 | 0.3223 | <0.0001 |

|           |       |        |         |
|-----------|-------|--------|---------|
| DOLPP1    | 0.825 | 0.3224 | <0.0001 |
| ULK3      | 0.91  | 0.3225 | 0.004   |
| LMCD1     | 0.878 | 0.3226 | 0.0001  |
| KIF13A    | 0.784 | 0.3227 | <0.0001 |
| FIG4      | 0.869 | 0.3228 | 0.0002  |
| NEDD4     | 0.877 | 0.3229 | 0.0003  |
| MOB4      | 0.828 | 0.3229 | 0.0031  |
| MIR6069   | 0     | 0.3229 | <0.0001 |
| BCL7B     | 0.881 | 0.323  | 0.0001  |
| LONP1     | 0.683 | 0.323  | <0.0001 |
| C11orf72  | 0.888 | 0.3231 | 0.005   |
| TMEM245   | 0.746 | 0.3232 | 0.0048  |
| GPX2      | 0.787 | 0.3232 | <0.0001 |
| LINC01497 | 0.2   | 0.3233 | <0.0001 |
| RPL37A    | 0.883 | 0.3234 | 0.0004  |
| TSSK1A    | 0     | 0.3234 | <0.0001 |
| RNF14     | 0.889 | 0.3235 | 0.0004  |
| CYP7A1    | 0.837 | 0.3235 | <0.0001 |
| SLC43A2   | 0.886 | 0.3236 | 0.0013  |
| BIK       | 0.847 | 0.3238 | <0.0001 |
| ZFAND2B   | 0.844 | 0.3239 | 0.0002  |
| TTC30B    | 0.854 | 0.3239 | 0.0005  |
| OVAAL     | 0     | 0.3239 | <0.0001 |
| PARN      | 0.813 | 0.324  | <0.0001 |
| FHAD1     | 0.872 | 0.3241 | 0.0005  |
| ZNF367    | 0.806 | 0.3241 | <0.0001 |
| STRA8     | 0.66  | 0.3242 | <0.0001 |
| ARFIP2    | 0.898 | 0.3244 | 0.0003  |
| KDM4D     | 0.8   | 0.3244 | <0.0001 |
| FBXO4     | 0.815 | 0.3244 | <0.0001 |
| ZNF565    | 0.705 | 0.3245 | <0.0001 |
| PTPN1     | 0.902 | 0.3246 | 0.0008  |
| B3GALT6   | 0.763 | 0.3246 | <0.0001 |

|           |       |        |         |
|-----------|-------|--------|---------|
| MAP3K4    | 0.903 | 0.3248 | 0.0004  |
| DLX6-AS1  | 0.309 | 0.3248 | <0.0001 |
| TMEM248   | 0.759 | 0.3249 | 0.0022  |
| PSMD12    | 0.909 | 0.325  | 0.0013  |
| TTC7A     | 0.717 | 0.3251 | <0.0001 |
| EGLN3     | 0.77  | 0.3251 | <0.0001 |
| PDCD2     | 0.86  | 0.3251 | <0.0001 |
| ERF       | 0.862 | 0.3251 | <0.0001 |
| RPL36     | 0.879 | 0.3252 | 0.0003  |
| TIMM13    | 0.63  | 0.3253 | <0.0001 |
| RABL3     | 0.863 | 0.3255 | 0.0004  |
| TCF15     | 0.927 | 0.3256 | 0.0034  |
| RN7SKP281 | 0     | 0.3256 | <0.0001 |
| GLE1      | 0.848 | 0.3259 | <0.0001 |
| ADAMTS16  | 0.725 | 0.326  | <0.0001 |
| ELOVL7    | 0.819 | 0.3261 | <0.0001 |
| PRPF40A   | 0.839 | 0.3261 | <0.0001 |
| RPS10P14  | 0     | 0.3263 | <0.0001 |
| QRSL1     | 0.766 | 0.3264 | <0.0001 |
| PUM1      | 0.913 | 0.3269 | 0.0013  |
| SRA1      | 0.806 | 0.3269 | <0.0001 |
| SOHLH2    | 0.711 | 0.327  | <0.0001 |
| AHCY      | 0.753 | 0.327  | <0.0001 |
| BAGE      | 0.843 | 0.3271 | 0.0005  |
| LINC00942 | 0.532 | 0.3271 | 0.0006  |
| PLAC8L1   | 0.637 | 0.3271 | <0.0001 |
| JKAMP     | 0.859 | 0.3272 | 0.003   |
| TEX22     | 0.89  | 0.3272 | 0.0451  |
| MFSD10    | 0.648 | 0.3272 | <0.0001 |
| SLC11A2   | 0.906 | 0.3273 | 0.0009  |
| HSP90AA4P | 0.711 | 0.3274 | 0.0063  |
| ZNF627    | 0.824 | 0.3274 | <0.0001 |
| TNFSF15   | 0.84  | 0.3274 | <0.0001 |

|              |       |        |         |
|--------------|-------|--------|---------|
| SNORA74A     | 0.842 | 0.3275 | 0.0017  |
| ZNF35        | 0.823 | 0.3275 | <0.0001 |
| LOC100506082 | 0.444 | 0.3277 | <0.0001 |
| LOC101928937 | 0.358 | 0.3279 | <0.0001 |
| AAK1         | 0.889 | 0.3281 | 0.0002  |
| SPPL3        | 0.836 | 0.3282 | 0.0012  |
| LINC01101    | 0.68  | 0.3283 | 0.0053  |
| MSL1         | 0.923 | 0.3283 | 0.0151  |
| ZNF277       | 0.882 | 0.3284 | 0.0016  |
| LLGL1        | 0.929 | 0.3284 | 0.0019  |
| RHOT1        | 0.823 | 0.3284 | <0.0001 |
| MGST3        | 0.896 | 0.3287 | 0.0002  |
| HIST1H4L     | 0.881 | 0.329  | 0.0004  |
| TMEM8B       | 0.669 | 0.3291 | <0.0001 |
| C5orf24      | 0.895 | 0.3292 | 0.0014  |
| NAV2-AS3     | 0     | 0.3292 | <0.0001 |
| FBF1         | 0.929 | 0.3295 | 0.0154  |
| RPS24        | 0.873 | 0.3296 | 0.0003  |
| NIPAL2       | 0.849 | 0.3296 | 0.0008  |
| ANKRD65      | 0.878 | 0.3296 | 0.0355  |
| CYB5R4       | 0.764 | 0.3297 | <0.0001 |
| UBE2NL       | 0.791 | 0.3297 | <0.0001 |
| ACTA2        | 0.885 | 0.3297 | <0.0001 |
| MARVELD2     | 0.86  | 0.3298 | 0.0002  |
| SFSWAP       | 0.854 | 0.3299 | 0.0021  |
| SYN3         | 0.782 | 0.3299 | <0.0001 |
| GCSHP4       | 0     | 0.33   | <0.0001 |
| LINC01479    | 0     | 0.33   | <0.0001 |
| TRABD        | 0.879 | 0.3301 | 0.0003  |
| LOC101928461 | 0     | 0.3302 | <0.0001 |
| ZNF574       | 0.92  | 0.3303 | 0.0027  |
| ZNF518A      | 0.912 | 0.3303 | 0.0127  |
| TAPBP        | 0.773 | 0.3303 | <0.0001 |

|              |       |        |         |
|--------------|-------|--------|---------|
| LY6H         | 0.871 | 0.3305 | <0.0001 |
| ZCCHC3       | 0.851 | 0.3308 | 0.0006  |
| ZNF551       | 0.781 | 0.3308 | <0.0001 |
| IFITM3       | 0.896 | 0.3311 | 0.0002  |
| COLCA1       | 0.778 | 0.3311 | 0.0363  |
| LINC00412    | 0.309 | 0.3311 | <0.0001 |
| EZH1         | 0.913 | 0.3312 | 0.0006  |
| MIR6774      | 0.488 | 0.3313 | <0.0001 |
| CCDC85A      | 0.826 | 0.3313 | <0.0001 |
| STX3         | 0.845 | 0.3313 | <0.0001 |
| S100A1       | 0.814 | 0.3314 | <0.0001 |
| MIR3163      | 0.118 | 0.3315 | <0.0001 |
| LOC100505498 | 0.467 | 0.3315 | <0.0001 |
| FIZ1         | 0.812 | 0.3315 | <0.0001 |
| RPL13A       | 0.873 | 0.3318 | 0.0011  |
| CDC42        | 0.871 | 0.3318 | <0.0001 |
| BCS1L        | 0.898 | 0.3319 | 0.0003  |
| RAD23A       | 0.906 | 0.332  | 0.0008  |
| MIR378D2     | 0     | 0.332  | 0.0246  |
| ZNF28        | 0.881 | 0.3321 | 0.0008  |
| MTF1         | 0.818 | 0.3321 | <0.0001 |
| FAM3A        | 0.843 | 0.3321 | <0.0001 |
| F8A1         | 0.846 | 0.3322 | 0.0019  |
| UBXN7        | 0.868 | 0.3322 | 0.0021  |
| INTS4P2      | 0     | 0.3322 | <0.0001 |
| KIF7         | 0.828 | 0.3322 | <0.0001 |
| PTPN11       | 0.874 | 0.3324 | 0.0002  |
| WWP2         | 0.815 | 0.3324 | <0.0001 |
| ANKS1B       | 0.845 | 0.3324 | <0.0001 |
| ZNF606       | 0.863 | 0.3325 | 0.0001  |
| NMU          | 0.868 | 0.3327 | 0.0002  |
| SYCE3        | 0.848 | 0.3327 | 0.0114  |
| NBPF2P       | 0     | 0.3327 | <0.0001 |

|           |       |        |         |
|-----------|-------|--------|---------|
| SLITRK4   | 0.623 | 0.3327 | <0.0001 |
| IL22RA1   | 0.787 | 0.3327 | <0.0001 |
| TTL5      | 0.823 | 0.3327 | <0.0001 |
| SERPINB6  | 0.864 | 0.3328 | 0.0002  |
| GAPDHP27  | 0.548 | 0.3328 | 0.0398  |
| ZNF652    | 0.931 | 0.333  | 0.0042  |
| KIAA1324  | 0.717 | 0.333  | <0.0001 |
| EXOSC8    | 0.758 | 0.333  | <0.0001 |
| ZNF718    | 0.789 | 0.333  | <0.0001 |
| ADPRHL1   | 0.732 | 0.3332 | <0.0001 |
| PPP2R5B   | 0.882 | 0.3333 | 0.0002  |
| WRAP53    | 0.765 | 0.3333 | <0.0001 |
| NINJ2     | 0.77  | 0.3333 | <0.0001 |
| UBAC1     | 0.79  | 0.3333 | <0.0001 |
| SRC       | 0.861 | 0.3334 | <0.0001 |
| IDH1-AS1  | 0.777 | 0.3336 | 0.0194  |
| FKBP8     | 0.865 | 0.3337 | <0.0001 |
| COX7A2    | 0.869 | 0.3337 | <0.0001 |
| COL9A1    | 0.924 | 0.3338 | 0.001   |
| PAK6      | 0.952 | 0.3338 | 0.0149  |
| TDGF1P3   | 0.646 | 0.3338 | 0.0159  |
| PRKAR1A   | 0.888 | 0.3339 | 0.0002  |
| CYB5B     | 0.718 | 0.3339 | <0.0001 |
| TMUB1     | 0.889 | 0.334  | 0.0012  |
| RAB11FIP1 | 0.742 | 0.334  | <0.0001 |
| ZNF732    | 0.766 | 0.3342 | 0.0002  |
| ACIN1     | 0.902 | 0.3343 | 0.0004  |
| RPAP2     | 0.886 | 0.3343 | 0.0007  |
| ACTR10    | 0.851 | 0.3343 | <0.0001 |
| IMPA2     | 0.868 | 0.3343 | <0.0001 |
| VSIG10L   | 0.531 | 0.3344 | <0.0001 |
| POP7      | 0.867 | 0.3345 | 0.0001  |
| ACOT7     | 0.899 | 0.3345 | 0.0002  |

|              |       |        |         |
|--------------|-------|--------|---------|
| RNU6ATAC6P   | 0     | 0.3346 | 0.0325  |
| POT1         | 0.871 | 0.3347 | 0.0002  |
| CT83         | 0.169 | 0.3347 | <0.0001 |
| NTM          | 0.782 | 0.3348 | 0.0001  |
| GNPTAB       | 0.863 | 0.3348 | <0.0001 |
| LOC440173    | 0.539 | 0.3349 | 0.0003  |
| PWWP2B       | 0.833 | 0.335  | 0.0005  |
| DNAJC21      | 0.906 | 0.335  | 0.0025  |
| ACBD7        | 0.862 | 0.3351 | 0.0005  |
| OR8G5        | 0.565 | 0.3351 | <0.0001 |
| NT5C         | 0.823 | 0.3351 | <0.0001 |
| MS4A8        | 0     | 0.3352 | <0.0001 |
| POTEKP       | 0.488 | 0.3352 | <0.0001 |
| LRRC41       | 0.828 | 0.3353 | <0.0001 |
| EIF4A2       | 0.866 | 0.3353 | <0.0001 |
| LOC100287852 | 0     | 0.3354 | 0.002   |
| LINC00351    | 0.195 | 0.3354 | <0.0001 |
| MCM3AP       | 0.762 | 0.3354 | <0.0001 |
| FRAT1        | 0.849 | 0.3354 | <0.0001 |
| KCTD18       | 0.844 | 0.3356 | <0.0001 |
| WDR6         | 0.901 | 0.3358 | 0.0012  |
| ARG2         | 0.823 | 0.3359 | <0.0001 |
| SYNM         | 0.737 | 0.336  | <0.0001 |
| NOM1         | 0.8   | 0.3362 | <0.0001 |
| PPP6C        | 0.859 | 0.3362 | <0.0001 |
| ZNF514       | 0.847 | 0.3363 | 0.0001  |
| ZNF202       | 0.89  | 0.3363 | 0.0004  |
| AGPAT4-IT1   | 0.251 | 0.3363 | <0.0001 |
| PCDHGA4      | 0.745 | 0.3364 | 0.0006  |
| METTL9       | 0.916 | 0.3364 | 0.0006  |
| SLC14A2-AS1  | 0.086 | 0.3367 | <0.0001 |
| SNX24        | 0.792 | 0.3367 | <0.0001 |
| RAB41        | 0.926 | 0.3368 | 0.0213  |

|           |       |        |         |
|-----------|-------|--------|---------|
| AGR2      | 0.36  | 0.3368 | <0.0001 |
| AP1M2     | 0.822 | 0.3368 | <0.0001 |
| SNORA51   | 0.187 | 0.3369 | <0.0001 |
| DIMT1     | 0.888 | 0.337  | 0.0141  |
| SCCPDH    | 0.863 | 0.337  | <0.0001 |
| CAV1      | 0.913 | 0.3371 | 0.0005  |
| EIF4EBP1  | 0.828 | 0.3371 | <0.0001 |
| LUZP1     | 0.858 | 0.3371 | <0.0001 |
| C14orf119 | 0.853 | 0.3372 | 0.0002  |
| GID8      | 0.765 | 0.3372 | 0.0022  |
| MIR3910-1 | 0.212 | 0.3372 | 0.0445  |
| LRFN3     | 0.788 | 0.3372 | <0.0001 |
| RIMBP3    | 0.838 | 0.3373 | 0.0302  |
| LINC01079 | 0.377 | 0.3374 | <0.0001 |
| PCDHB14   | 0.638 | 0.3376 | <0.0001 |
| IFRD2     | 0.889 | 0.3376 | <0.0001 |
| TBC1D9B   | 0.878 | 0.3378 | 0.0001  |
| SNHG16    | 0.231 | 0.3379 | <0.0001 |
| RPS8      | 0.71  | 0.3379 | <0.0001 |
| MAP3K20   | 0     | 0.338  | <0.0001 |
| TGFBR1    | 0.755 | 0.338  | <0.0001 |
| RPL10     | 0.893 | 0.3381 | 0.0041  |
| BCRP5     | 0     | 0.3383 | <0.0001 |
| RNU6-638P | 0     | 0.3383 | <0.0001 |
| UFL1-AS1  | 0.431 | 0.3383 | <0.0001 |
| STAM2     | 0.841 | 0.3383 | <0.0001 |
| DENND1A   | 0.851 | 0.3383 | <0.0001 |
| TMEM120B  | 0.839 | 0.3384 | 0.0003  |
| C2orf27A  | 0.766 | 0.3384 | <0.0001 |
| RPLP0P2   | 0.873 | 0.3385 | 0.018   |
| SCN4B     | 0.78  | 0.3385 | <0.0001 |
| ANKRD18CP | 0.163 | 0.3386 | <0.0001 |
| PTH2R     | 0.617 | 0.3386 | <0.0001 |



|             |       |        |         |
|-------------|-------|--------|---------|
| TMEM67      | 0.756 | 0.3386 | <0.0001 |
| DCTN3       | 0.851 | 0.3386 | <0.0001 |
| TUBB2B      | 0.736 | 0.3387 | <0.0001 |
| TPRA1       | 0.733 | 0.3388 | <0.0001 |
| RPL31P28    | 0.527 | 0.3389 | 0.0385  |
| GAPDHP21    | 0     | 0.3389 | <0.0001 |
| ARHGAP28    | 0.863 | 0.339  | <0.0001 |
| POLD2       | 0.867 | 0.339  | <0.0001 |
| TSPAN8      | 0.808 | 0.3391 | <0.0001 |
| ZNF524      | 0.743 | 0.3392 | <0.0001 |
| DSCR8       | 0.866 | 0.3393 | 0.0004  |
| C20orf202   | 0.76  | 0.3393 | 0.0006  |
| MGAT5       | 0.84  | 0.3393 | <0.0001 |
| RNU4ATAC12P | 0     | 0.3394 | <0.0001 |
| WDR75       | 0.807 | 0.3394 | <0.0001 |
| TMEM127     | 0.864 | 0.3394 | <0.0001 |
| LPP         | 0.896 | 0.3395 | 0.0001  |
| FAM155B     | 0.865 | 0.3395 | 0.0002  |
| CASQ2       | 0.673 | 0.3395 | <0.0001 |
| LAMB3       | 0.806 | 0.3396 | <0.0001 |
| KRT86       | 0.865 | 0.3398 | 0.0007  |
| THTPA       | 0.821 | 0.3398 | <0.0001 |
| C16orf91    | 0.826 | 0.3399 | 0.0018  |
| KCNQ3       | 0.862 | 0.3399 | <0.0001 |
| RAB7B       | 0.908 | 0.34   | 0.0099  |
| HNRNPA1P57  | 0     | 0.34   | <0.0001 |
| SERGEF      | 0.756 | 0.34   | <0.0001 |
| FASTKD5     | 0.846 | 0.34   | <0.0001 |
| DANCR       | 0.645 | 0.3401 | 0.0044  |
| LOC728485   | 0.63  | 0.3402 | 0.0341  |
| SGSH        | 0.832 | 0.3402 | <0.0001 |
| MRM1        | 0.857 | 0.3403 | 0.0001  |
| TDRD5       | 0.59  | 0.3403 | <0.0001 |

|           |       |        |         |
|-----------|-------|--------|---------|
| SIRT6     | 0.863 | 0.3403 | <0.0001 |
| APC       | 0.882 | 0.3404 | <0.0001 |
| CDK5RAP3  | 0.899 | 0.3408 | 0.0002  |
| PLCXD1    | 0.746 | 0.3408 | <0.0001 |
| CASP8     | 0.869 | 0.3408 | <0.0001 |
| PAEP      | 0.661 | 0.341  | <0.0001 |
| ZNF391    | 0.718 | 0.341  | <0.0001 |
| MED26     | 0.879 | 0.3411 | 0.0003  |
| SULT4A1   | 0.427 | 0.3412 | <0.0001 |
| OCLN      | 0.804 | 0.3412 | <0.0001 |
| AMMECR1   | 0.88  | 0.3413 | <0.0001 |
| HSPA1L    | 0.833 | 0.3414 | <0.0001 |
| SEH1L     | 0.88  | 0.3415 | 0.0002  |
| TMEM126A  | 0.796 | 0.3415 | <0.0001 |
| HSPBAP1   | 0.824 | 0.3415 | <0.0001 |
| PCDHGB2   | 0.558 | 0.342  | <0.0001 |
| CST2      | 0.804 | 0.3422 | <0.0001 |
| KLHL34    | 0.702 | 0.3423 | <0.0001 |
| HDAC4     | 0.84  | 0.3424 | <0.0001 |
| C11orf58  | 0.921 | 0.3425 | 0.0017  |
| LINC01014 | 0     | 0.3425 | <0.0001 |
| RPS6KB2   | 0.872 | 0.3425 | <0.0001 |
| MRPL12    | 0.942 | 0.3426 | 0.0091  |
| CERS1     | 0.819 | 0.3426 | 0.0212  |
| LINC01048 | 0     | 0.3428 | <0.0001 |
| CDK19     | 0.722 | 0.3428 | <0.0001 |
| TERC      | 0.812 | 0.3429 | 0.0198  |
| CHST10    | 0.834 | 0.3429 | <0.0001 |
| HMGB3P22  | 0.434 | 0.343  | <0.0001 |
| MID2      | 0.826 | 0.343  | <0.0001 |
| EEF1GP8   | 0     | 0.3431 | <0.0001 |
| RBMY1E    | 0.46  | 0.3431 | <0.0001 |
| AGPAT4    | 0.737 | 0.3431 | <0.0001 |

|           |       |        |         |
|-----------|-------|--------|---------|
| CHRNA5    | 0.906 | 0.3432 | 0.0003  |
| LINC00559 | 0.369 | 0.3432 | <0.0001 |
| WASL      | 0.854 | 0.3432 | <0.0001 |
| ZNF195    | 0.861 | 0.3432 | <0.0001 |
| RPL32     | 0.931 | 0.3433 | 0.005   |
| RTCB      | 0.829 | 0.3433 | 0.007   |
| RPF2      | 0.717 | 0.3433 | <0.0001 |
| CD93      | 0.92  | 0.3434 | 0.0006  |
| PPY2P     | 0     | 0.3434 | <0.0001 |
| COL22A1   | 0.738 | 0.3435 | <0.0001 |
| TRAF3IP1  | 0.856 | 0.3437 | <0.0001 |
| VDAC3     | 0.68  | 0.3439 | <0.0001 |
| NBR2      | 0.824 | 0.3439 | <0.0001 |
| HFE       | 0.906 | 0.3442 | 0.0002  |
| RPL15     | 0.91  | 0.3442 | 0.0009  |
| GPX4      | 0.913 | 0.3444 | 0.0004  |
| TMSB15A   | 0.767 | 0.3444 | 0.0011  |
| RPS7P5    | 0.643 | 0.3444 | 0.0405  |
| SNORA4    | 0.412 | 0.3444 | <0.0001 |
| LSM1      | 0.838 | 0.3445 | <0.0001 |
| RPL3P2    | 0     | 0.3446 | <0.0001 |
| ADGRV1    | 0.234 | 0.3446 | <0.0001 |
| CDS2      | 0.845 | 0.3446 | <0.0001 |
| PGP       | 0.895 | 0.3448 | 0.0034  |
| TSPO2     | 0.746 | 0.3448 | <0.0001 |
| SNX7      | 0.892 | 0.345  | 0.0002  |
| TBC1D12   | 0.926 | 0.345  | 0.0032  |
| NEURL2    | 0.699 | 0.345  | <0.0001 |
| PSMB7     | 0.876 | 0.3451 | <0.0001 |
| PCDHGB1   | 0.586 | 0.3452 | <0.0001 |
| TESC      | 0.831 | 0.3453 | <0.0001 |
| ECE2      | 0.917 | 0.3455 | 0.0005  |
| DRC1      | 0.843 | 0.3455 | 0.0132  |

|             |       |        |         |
|-------------|-------|--------|---------|
| OSGEPL1-AS1 | 0.284 | 0.3455 | <0.0001 |
| LOC155060   | 0.848 | 0.3456 | 0.0056  |
| CFAP45      | 0.537 | 0.3457 | 0.0407  |
| KCNJ11      | 0.781 | 0.3457 | <0.0001 |
| DLEU2       | 0.894 | 0.3458 | 0.0044  |
| RNU6-140P   | 0     | 0.3458 | <0.0001 |
| SACS        | 0.859 | 0.3458 | <0.0001 |
| TMEM187     | 0.883 | 0.3459 | 0.0003  |
| MED17       | 0.776 | 0.3462 | <0.0001 |
| TMCC3       | 0.834 | 0.3465 | <0.0001 |
| HERC2P7     | 0.923 | 0.3467 | 0.0366  |
| ZNF500      | 0.86  | 0.3467 | <0.0001 |
| FBXO9       | 0.909 | 0.3468 | 0.0004  |
| PRDM7       | 0.754 | 0.3468 | <0.0001 |
| ZNF227      | 0.672 | 0.3469 | <0.0001 |
| ELP4        | 0.86  | 0.3469 | <0.0001 |
| ARHGEF18    | 0.954 | 0.347  | 0.0081  |
| IAH1        | 0.838 | 0.3471 | <0.0001 |
| RFX7        | 0.881 | 0.3472 | 0.0016  |
| TMED10P2    | 0     | 0.3472 | <0.0001 |
| CD99L2      | 0.858 | 0.3473 | <0.0001 |
| RPS6        | 0.896 | 0.3475 | 0.0003  |
| ZNF362      | 0.823 | 0.3475 | <0.0001 |
| MAML1       | 0.94  | 0.3476 | 0.0024  |
| FOPNL       | 0.616 | 0.3476 | <0.0001 |
| UPF1        | 0.764 | 0.3476 | <0.0001 |
| MAGEA8      | 0.829 | 0.3476 | <0.0001 |
| ELMO1       | 0.845 | 0.3476 | <0.0001 |
| ZFAND2A     | 0.675 | 0.3477 | <0.0001 |
| RNASEH1P1   | 0.011 | 0.348  | <0.0001 |
| RGSL1       | 0.567 | 0.3481 | <0.0001 |
| GABBR2      | 0.845 | 0.3481 | <0.0001 |
| RBM10       | 0.864 | 0.3481 | <0.0001 |

|           |       |        |         |
|-----------|-------|--------|---------|
| RN7SKP278 | 0     | 0.3483 | 0.0265  |
| CDK14     | 0.766 | 0.3483 | <0.0001 |
| GPC2      | 0.827 | 0.3483 | <0.0001 |
| ANKRD61   | 0.789 | 0.3484 | 0.0172  |
| COX7C     | 0.921 | 0.3486 | 0.0008  |
| PCDHB8    | 0.625 | 0.3486 | <0.0001 |
| ZNF695    | 0.857 | 0.3487 | 0.0008  |
| RBM14     | 0.915 | 0.3487 | 0.0011  |
| ATR       | 0.926 | 0.3489 | 0.0012  |
| LINC01060 | 0.437 | 0.3489 | <0.0001 |
| MAP1A     | 0.827 | 0.3489 | <0.0001 |
| CLIP2     | 0.836 | 0.3489 | <0.0001 |
| XIAP      | 0.764 | 0.3491 | <0.0001 |
| HCP5      | 0.825 | 0.3491 | <0.0001 |
| PSMC1     | 0.878 | 0.3492 | 0.0002  |
| XPO6      | 0.839 | 0.3492 | <0.0001 |
| PSMC6     | 0.929 | 0.3493 | 0.0043  |
| USP13     | 0.857 | 0.3493 | <0.0001 |
| SP3       | 0.91  | 0.3494 | 0.0008  |
| NR2C2     | 0.945 | 0.3494 | 0.0059  |
| APBA3     | 0.787 | 0.3494 | <0.0001 |
| RAD51B    | 0.865 | 0.3495 | 0.0053  |
| BCR       | 0.873 | 0.3495 | <0.0001 |
| CD163L1   | 0.891 | 0.3496 | 0.0004  |
| ADAM23    | 0.676 | 0.3496 | <0.0001 |
| SH3RF2    | 0.88  | 0.3497 | 0.0004  |
| C11orf49  | 0.817 | 0.3498 | <0.0001 |
| MRPS5     | 0.822 | 0.3498 | <0.0001 |
| MAGED4    | 0.879 | 0.3499 | 0.007   |
| ELFN1-AS1 | 0     | 0.3499 | <0.0001 |
| RASGRP3   | 0.872 | 0.3499 | <0.0001 |
| PPP2R3C   | 0.871 | 0.35   | 0.0002  |
| TGIF2LX   | 0.648 | 0.3501 | 0.0015  |

|              |       |        |         |
|--------------|-------|--------|---------|
| LOC101926962 | 0.242 | 0.3501 | <0.0001 |
| MIR3198-1    | 0     | 0.3502 | <0.0001 |
| ITGA11       | 0.695 | 0.3504 | <0.0001 |
| LOC100132057 | 0.582 | 0.3507 | 0.0137  |
| ERV9-1       | 0.134 | 0.3508 | <0.0001 |
| SAMD12-AS1   | 0.362 | 0.3508 | <0.0001 |
| CTCF         | 0.857 | 0.3508 | <0.0001 |
| FBLIM1       | 0.869 | 0.3508 | <0.0001 |
| KRT8P35      | 0     | 0.3509 | <0.0001 |
| CCNY         | 0.834 | 0.3509 | <0.0001 |
| LINC01099    | 0.265 | 0.351  | <0.0001 |
| BAK1P1       | 0.26  | 0.3511 | <0.0001 |
| CCDC110      | 0.565 | 0.3511 | <0.0001 |
| BRI3         | 0.672 | 0.3511 | <0.0001 |
| LRP10        | 0.848 | 0.3511 | <0.0001 |
| EIF4BP6      | 0.421 | 0.3513 | <0.0001 |
| KEAP1        | 0.874 | 0.3513 | <0.0001 |
| ICE1         | 0.745 | 0.3514 | 0.0043  |
| DGKQ         | 0.898 | 0.3517 | 0.0001  |
| DNM2         | 0.904 | 0.3517 | 0.0001  |
| FGD5-AS1     | 0.807 | 0.3517 | 0.0339  |
| ZNRF1        | 0.694 | 0.3517 | <0.0001 |
| PNPT1        | 0.879 | 0.3518 | 0.0005  |
| RNU7-59P     | 0.35  | 0.3519 | <0.0001 |
| ALG1L2       | 0.701 | 0.352  | 0.0075  |
| DHCR7        | 0.862 | 0.352  | <0.0001 |
| SLX4IP       | 0.897 | 0.3521 | 0.0397  |
| MUCL1        | 0.543 | 0.3521 | <0.0001 |
| PPM1D        | 0.9   | 0.3522 | 0.0003  |
| ZNF812P      | 0     | 0.3522 | <0.0001 |
| URB1         | 0.82  | 0.3522 | <0.0001 |
| UXT          | 0.908 | 0.3524 | 0.0006  |
| ZBTB7B       | 0.907 | 0.3524 | 0.0007  |

|           |       |        |         |
|-----------|-------|--------|---------|
| PIP5K1C   | 0.705 | 0.3524 | <0.0001 |
| TAX1BP3   | 0.901 | 0.3525 | 0.003   |
| ESCO1     | 0.838 | 0.3525 | <0.0001 |
| AXDND1    | 0.823 | 0.3527 | 0.0029  |
| MYL6      | 0.945 | 0.3528 | 0.0054  |
| TNIP1     | 0.852 | 0.3528 | <0.0001 |
| MRPS9     | 0.735 | 0.353  | <0.0001 |
| LINC00673 | 0.507 | 0.3531 | 0.0323  |
| TIRAP     | 0.872 | 0.3533 | 0.0003  |
| LINC01090 | 0.117 | 0.3535 | <0.0001 |
| MXD4      | 0.703 | 0.3535 | <0.0001 |
| ADAMTS6   | 0.849 | 0.3535 | <0.0001 |
| EIF4H     | 0.907 | 0.3536 | 0.0005  |
| UGGT2     | 0.752 | 0.3536 | <0.0001 |
| MPP3      | 0.823 | 0.3537 | <0.0001 |
| CCNB3     | 0.792 | 0.3538 | <0.0001 |
| MIR4644   | 0.118 | 0.3539 | <0.0001 |
| ENOX1     | 0.599 | 0.3539 | <0.0001 |
| MRPS15    | 0.697 | 0.3539 | <0.0001 |
| TARDBP    | 0.961 | 0.354  | 0.0189  |
| MEX3B     | 0.708 | 0.354  | <0.0001 |
| PEX1      | 0.845 | 0.354  | <0.0001 |
| TMX2      | 0.695 | 0.3541 | <0.0001 |
| DET1      | 0.886 | 0.3542 | <0.0001 |
| RAB3GAP1  | 0.866 | 0.3543 | <0.0001 |
| EIF3LP2   | 0.303 | 0.3545 | <0.0001 |
| RNA5SP372 | 0     | 0.3547 | <0.0001 |
| ZNF585A   | 0.913 | 0.3549 | 0.002   |
| QTRT2     | 0.135 | 0.355  | <0.0001 |
| LINC00886 | 0.435 | 0.355  | <0.0001 |
| CHM       | 0.839 | 0.355  | <0.0001 |
| TBCA      | 0.886 | 0.3551 | <0.0001 |
| TASP1     | 0.868 | 0.3552 | <0.0001 |

|             |       |        |         |
|-------------|-------|--------|---------|
| SDHAF2      | 0.935 | 0.3553 | 0.0177  |
| RNU6-50P    | 0.543 | 0.3554 | 0.0298  |
| TRPC1       | 0.826 | 0.3555 | <0.0001 |
| HIST1H2BC   | 0.801 | 0.3556 | <0.0001 |
| SLC30A5     | 0.846 | 0.3557 | <0.0001 |
| MTA2        | 0.869 | 0.3557 | <0.0001 |
| CHCHD1      | 0.777 | 0.3558 | <0.0001 |
| ZBED3       | 0.72  | 0.3559 | <0.0001 |
| CAPZB       | 0.883 | 0.3559 | <0.0001 |
| POM121C     | 0.846 | 0.356  | 0.0011  |
| LINC00922   | 0     | 0.356  | <0.0001 |
| FGF21       | 0.777 | 0.3561 | <0.0001 |
| BMS1        | 0.858 | 0.3562 | <0.0001 |
| ANXA9       | 0.679 | 0.3563 | <0.0001 |
| TMEM214     | 0.828 | 0.3564 | 0.0002  |
| NR0B1       | 0.836 | 0.3565 | <0.0001 |
| FOXC2-AS1   | 0.11  | 0.3567 | <0.0001 |
| PCBP4       | 0.867 | 0.3567 | <0.0001 |
| LGALS8      | 0.885 | 0.3568 | <0.0001 |
| DBNL        | 0.77  | 0.3571 | <0.0001 |
| SLCO2A1     | 0.855 | 0.3571 | <0.0001 |
| SLC29A2     | 0.834 | 0.3572 | <0.0001 |
| RPS23       | 0.928 | 0.3573 | 0.0034  |
| PPP6R3      | 0.791 | 0.3574 | 0.0001  |
| OSTCP2      | 0.465 | 0.3574 | <0.0001 |
| RIMS2       | 0.859 | 0.3574 | <0.0001 |
| ANKRD20A12P | 0.235 | 0.3575 | <0.0001 |
| NR2F6       | 0.907 | 0.3576 | 0.0003  |
| NDUFB11     | 0.635 | 0.3576 | <0.0001 |
| EIF3I       | 0.857 | 0.3577 | <0.0001 |
| FLOT2       | 0.893 | 0.3577 | <0.0001 |
| PSMD7       | 0.893 | 0.3578 | 0.0001  |
| ZNF765      | 0.852 | 0.3578 | 0.0002  |



|           |       |        |         |
|-----------|-------|--------|---------|
| NEK8      | 0.882 | 0.3578 | 0.0003  |
| JAG1      | 0.847 | 0.3579 | <0.0001 |
| USP54     | 0.59  | 0.358  | <0.0001 |
| ZNF428    | 0.841 | 0.358  | <0.0001 |
| ZNF728    | 0.599 | 0.3581 | 0.0101  |
| ANO2      | 0.732 | 0.3581 | <0.0001 |
| ZSWIM3    | 0.82  | 0.3581 | <0.0001 |
| YARS2     | 0.843 | 0.3581 | <0.0001 |
| TOR1B     | 0.743 | 0.3582 | <0.0001 |
| HINFP     | 0.892 | 0.3583 | 0.0005  |
| LINC01583 | 0     | 0.3583 | <0.0001 |
| HOXD1     | 0.844 | 0.3583 | <0.0001 |
| SOAT1     | 0.865 | 0.3586 | <0.0001 |
| STARD3NL  | 0.846 | 0.3587 | <0.0001 |
| LRWD1     | 0.825 | 0.3588 | 0.0001  |
| TBC1D5    | 0.918 | 0.3588 | 0.0008  |
| PDCD6IPP2 | 0     | 0.359  | <0.0001 |
| HCP5B     | 0.433 | 0.359  | <0.0001 |
| RHOBTB3   | 0.862 | 0.359  | <0.0001 |
| XRN2      | 0.831 | 0.3591 | <0.0001 |
| CA8       | 0.858 | 0.3591 | <0.0001 |
| ZNF285    | 0.577 | 0.3592 | <0.0001 |
| SVIL      | 0.834 | 0.3593 | <0.0001 |
| GABRA3    | 0.905 | 0.3593 | <0.0001 |
| NKAIN2    | 0.624 | 0.3594 | <0.0001 |
| CDH11     | 0.803 | 0.3594 | <0.0001 |
| FMR1      | 0.86  | 0.3594 | <0.0001 |
| SERPINB1  | 0.938 | 0.3598 | 0.0028  |
| ATP6V0A2  | 0.723 | 0.3599 | <0.0001 |
| CTNND2    | 0.771 | 0.3599 | <0.0001 |
| SART1     | 0.912 | 0.36   | 0.0005  |
| LINC01508 | 0     | 0.36   | <0.0001 |
| OSGIN2    | 0.762 | 0.36   | <0.0001 |

|          |       |        |         |
|----------|-------|--------|---------|
| WDR35    | 0.809 | 0.36   | <0.0001 |
| SNORA72  | 0.774 | 0.3602 | 0.0012  |
| BBC3     | 0.924 | 0.3602 | 0.0019  |
| MRPL36   | 0.834 | 0.3603 | 0.0001  |
| KIAA1549 | 0.736 | 0.3603 | <0.0001 |
| MTOR     | 0.801 | 0.3603 | <0.0001 |
| GPN3     | 0.832 | 0.3604 | <0.0001 |
| RNF10    | 0.824 | 0.3606 | <0.0001 |
| TRIM50   | 0.793 | 0.3607 | <0.0001 |
| TESC-AS1 | 0.095 | 0.3608 | <0.0001 |
| DUSP8    | 0.828 | 0.3608 | <0.0001 |
| RPL10A   | 0.856 | 0.3608 | <0.0001 |
| TPI1P1   | 0.524 | 0.3611 | 0.0206  |
| COG7     | 0.816 | 0.3611 | <0.0001 |
| RHOBTB2  | 0.871 | 0.3611 | <0.0001 |
| GPNMB    | 0.91  | 0.3612 | 0.0001  |
| RIF1     | 0.857 | 0.3612 | 0.0002  |
| ATG12    | 0.839 | 0.3612 | <0.0001 |
| CTAG2    | 0.72  | 0.3613 | <0.0001 |
| JMJD6    | 0.879 | 0.3613 | <0.0001 |
| ARHGEF9  | 0.901 | 0.3614 | 0.0001  |
| AQP10    | 0.384 | 0.3614 | <0.0001 |
| CACNB3   | 0.824 | 0.3614 | <0.0001 |
| TOR1AIP2 | 0.824 | 0.3615 | <0.0001 |
| CALCRL   | 0.897 | 0.3615 | <0.0001 |
| TXNP6    | 0     | 0.3616 | <0.0001 |
| HES5     | 0.858 | 0.3617 | <0.0001 |
| DMTF1    | 0.938 | 0.3619 | 0.0013  |
| MSMB     | 0.855 | 0.3619 | <0.0001 |
| POMGNT1  | 0.835 | 0.362  | <0.0001 |
| CDH24    | 0.924 | 0.3621 | 0.0025  |
| GPR137   | 0.805 | 0.3621 | <0.0001 |
| SCIN     | 0.807 | 0.3621 | <0.0001 |

|              |       |        |         |
|--------------|-------|--------|---------|
| MYEF2        | 0.794 | 0.3622 | <0.0001 |
| HECTD2       | 0.858 | 0.3622 | <0.0001 |
| DAG1         | 0.878 | 0.3622 | <0.0001 |
| CADM1        | 0.879 | 0.3622 | <0.0001 |
| ABCA3        | 0.834 | 0.3623 | <0.0001 |
| IMMP2L       | 0.836 | 0.3624 | <0.0001 |
| DLGAP4       | 0.885 | 0.3626 | <0.0001 |
| CYTH3        | 0.741 | 0.3627 | <0.0001 |
| HSD11B2      | 0.809 | 0.3628 | <0.0001 |
| MIR5589      | 0.352 | 0.3629 | <0.0001 |
| EXOC6B       | 0.902 | 0.363  | 0.0002  |
| TTC23        | 0.836 | 0.363  | <0.0001 |
| ZNF76        | 0.909 | 0.3631 | 0.0003  |
| JAZF1        | 0.747 | 0.3632 | <0.0001 |
| TMOD3        | 0.845 | 0.3632 | <0.0001 |
| PSEN1        | 0.912 | 0.3633 | 0.0004  |
| HSP90AB6P    | 0.805 | 0.3633 | 0.0034  |
| MRPS30       | 0.768 | 0.3633 | <0.0001 |
| MUTYH        | 0.87  | 0.3633 | <0.0001 |
| CCDC24       | 0.727 | 0.3634 | <0.0001 |
| PSME1        | 0.893 | 0.3635 | 0.0001  |
| ZNF541       | 0.801 | 0.3636 | <0.0001 |
| SP4          | 0.877 | 0.3636 | <0.0001 |
| HCFC1R1      | 0.854 | 0.3637 | <0.0001 |
| FIP1L1       | 0.869 | 0.3637 | <0.0001 |
| CCDC66       | 0.885 | 0.3638 | 0.0001  |
| RIOK2        | 0.869 | 0.3639 | <0.0001 |
| SNCAIP       | 0.785 | 0.364  | <0.0001 |
| VTRNA1-2     | 0.44  | 0.3642 | <0.0001 |
| ERI1         | 0.821 | 0.3643 | <0.0001 |
| ZNF133       | 0.883 | 0.3643 | <0.0001 |
| LOC100128775 | 0.671 | 0.3644 | 0.0383  |
| DSG1-AS1     | 0     | 0.3644 | <0.0001 |

|           |       |        |         |
|-----------|-------|--------|---------|
| LINC01515 | 0     | 0.3644 | <0.0001 |
| RPL7A     | 0.791 | 0.3645 | 0.0002  |
| PCSK9     | 0.907 | 0.3645 | 0.0011  |
| IRGQ      | 0.924 | 0.3645 | 0.0013  |
| CAMSAP1   | 0.848 | 0.3645 | <0.0001 |
| GTF2F1    | 0.888 | 0.3645 | <0.0001 |
| UBE2E3    | 0.861 | 0.3646 | 0.0002  |
| SCGB1D2   | 0.803 | 0.3648 | <0.0001 |
| GMEB1     | 0.867 | 0.3648 | <0.0001 |
| MIR4273   | 0     | 0.3649 | 0.0114  |
| MIR604    | 0.656 | 0.3649 | 0.0189  |
| ZNF385C   | 0.878 | 0.365  | 0.0017  |
| LINC01257 | 0     | 0.365  | <0.0001 |
| WTAPP1    | 0.394 | 0.365  | <0.0001 |
| KIF21B    | 0.716 | 0.365  | <0.0001 |
| MIR6855   | 0     | 0.3651 | <0.0001 |
| AP4B1     | 0.85  | 0.3651 | <0.0001 |
| CKMT1A    | 0.629 | 0.3653 | <0.0001 |
| LINGO1    | 0.863 | 0.3653 | <0.0001 |
| TXLNA     | 0.934 | 0.3654 | 0.0019  |
| LINC01580 | 0     | 0.3654 | <0.0001 |
| SSU72P1   | 0     | 0.3654 | <0.0001 |
| RPS27A    | 0.912 | 0.3655 | 0.0007  |
| RPL4      | 0.805 | 0.3655 | <0.0001 |
| RFLNB     | 0.483 | 0.3658 | <0.0001 |
| RASEF     | 0.76  | 0.3658 | <0.0001 |
| CLTB      | 0.865 | 0.366  | <0.0001 |
| TTYH2     | 0.829 | 0.3661 | <0.0001 |
| FARS2     | 0.898 | 0.3662 | 0.0001  |
| DDX50     | 0.927 | 0.3662 | 0.0007  |
| KCTD17    | 0.846 | 0.3662 | <0.0001 |
| SYS1      | 0.854 | 0.3663 | <0.0001 |
| DAGLB     | 0.781 | 0.3664 | <0.0001 |

|          |       |        |         |
|----------|-------|--------|---------|
| TOP2B    | 0.906 | 0.3666 | 0.0003  |
| MEMO1    | 0.805 | 0.3666 | <0.0001 |
| DHDH     | 0.858 | 0.3666 | <0.0001 |
| AKAP8L   | 0.921 | 0.3668 | 0.0005  |
| YIF1A    | 0.823 | 0.3668 | <0.0001 |
| LRP8     | 0.826 | 0.3668 | <0.0001 |
| TRIM26   | 0.867 | 0.3668 | <0.0001 |
| AQR      | 0.884 | 0.3668 | <0.0001 |
| HIKESHI  | 0.385 | 0.3669 | <0.0001 |
| FBXO6    | 0.723 | 0.3671 | <0.0001 |
| MDM1     | 0.882 | 0.3675 | <0.0001 |
| RAB3C    | 0.471 | 0.3677 | <0.0001 |
| TSPAN10  | 0.826 | 0.3679 | <0.0001 |
| BCAS4    | 0.911 | 0.3681 | 0.0002  |
| ATG9A    | 0.923 | 0.3681 | 0.0003  |
| CREB3    | 0.653 | 0.3681 | <0.0001 |
| PDGFRB   | 0.808 | 0.3681 | <0.0001 |
| HCG18    | 0.851 | 0.3682 | 0.0004  |
| RHBDL3   | 0.652 | 0.3682 | <0.0001 |
| LHFPL2   | 0.834 | 0.3682 | <0.0001 |
| TGFB2    | 0.852 | 0.3683 | <0.0001 |
| DGKI     | 0.764 | 0.3684 | <0.0001 |
| RNU2-22P | 0.847 | 0.3685 | 0.0262  |
| ACTL8    | 0.857 | 0.3685 | <0.0001 |
| TRNP1    | 0.798 | 0.3686 | 0.0001  |
| BTNL8    | 0.553 | 0.3686 | <0.0001 |
| SNX5     | 0.813 | 0.3687 | <0.0001 |
| ABLIM2   | 0.813 | 0.3688 | <0.0001 |
| VDAC1P1  | 0     | 0.3689 | <0.0001 |
| PDK1     | 0.815 | 0.369  | <0.0001 |
| SKAP2    | 0.893 | 0.3691 | 0.0001  |
| CHST1    | 0.736 | 0.3691 | <0.0001 |
| NANOS1   | 0.9   | 0.3692 | 0.0004  |

|              |       |        |         |
|--------------|-------|--------|---------|
| PARVB        | 0.852 | 0.3692 | <0.0001 |
| MIR5684      | 0     | 0.3693 | <0.0001 |
| ZNF257       | 0.733 | 0.3694 | <0.0001 |
| ANXA11       | 0.925 | 0.3695 | 0.0003  |
| PPP1CB       | 0.922 | 0.3695 | 0.0006  |
| TPTE         | 0.64  | 0.3695 | <0.0001 |
| MRPL28       | 0.818 | 0.3695 | <0.0001 |
| FAM182B      | 0.575 | 0.3696 | 0.0001  |
| SNORA81      | 0.808 | 0.3696 | 0.031   |
| EIF1         | 0.923 | 0.3697 | 0.0009  |
| RNU4-52P     | 0.54  | 0.3699 | 0.0248  |
| LOC101929279 | 0.048 | 0.3699 | <0.0001 |
| BCDIN3D      | 0.819 | 0.37   | <0.0001 |
| RPL35        | 0.836 | 0.3701 | <0.0001 |
| TET3         | 0.919 | 0.3705 | 0.0034  |
| FAM124B      | 0.636 | 0.3706 | <0.0001 |
| TGIF2        | 0.878 | 0.3707 | <0.0001 |
| EFNA1        | 0.882 | 0.3707 | <0.0001 |
| LRRC10B      | 0.891 | 0.3709 | 0.0045  |
| MGA          | 0.883 | 0.371  | <0.0001 |
| RBM41        | 0.9   | 0.3711 | 0.0002  |
| MIR8078      | 0     | 0.3711 | <0.0001 |
| GAGE4        | 0.755 | 0.3712 | 0.0064  |
| LSS          | 0.927 | 0.3713 | 0.0003  |
| BFSP2        | 0.91  | 0.3714 | <0.0001 |
| CSTF3        | 0.84  | 0.3715 | <0.0001 |
| ARF4         | 0.926 | 0.3716 | 0.0004  |
| ADD1         | 0.881 | 0.3718 | <0.0001 |
| ZNF84        | 0.935 | 0.3719 | 0.0027  |
| IQCG         | 0.764 | 0.3719 | <0.0001 |
| MON1A        | 0.806 | 0.3719 | <0.0001 |
| TXLNG        | 0.807 | 0.3719 | <0.0001 |
| FAM172A      | 0.802 | 0.372  | <0.0001 |

|              |       |        |         |
|--------------|-------|--------|---------|
| LOC100505851 | 0.427 | 0.3721 | <0.0001 |
| COPS7A       | 0.745 | 0.3721 | <0.0001 |
| STK35        | 0.87  | 0.3722 | 0.0001  |
| SSX2B        | 0.753 | 0.3722 | 0.0008  |
| LOC101928661 | 0     | 0.3723 | <0.0001 |
| UBE2D1       | 0.841 | 0.3723 | <0.0001 |
| USP36        | 0.816 | 0.3724 | <0.0001 |
| HINT1        | 0.849 | 0.3724 | <0.0001 |
| VNN2         | 0.844 | 0.3725 | <0.0001 |
| KIAA1143     | 0.897 | 0.3727 | 0.0002  |
| NDUFAF3      | 0.88  | 0.3728 | 0.0008  |
| MAL2         | 0.84  | 0.3728 | <0.0001 |
| ZNF567       | 0.855 | 0.3728 | <0.0001 |
| C5orf67      | 0.344 | 0.3729 | <0.0001 |
| PSMG2        | 0.875 | 0.373  | 0.0003  |
| EID2         | 0.804 | 0.373  | <0.0001 |
| HIST1H4D     | 0.829 | 0.373  | <0.0001 |
| RNASE1       | 0.883 | 0.3731 | <0.0001 |
| N4BP3        | 0.937 | 0.3732 | 0.0051  |
| KLHL5        | 0.819 | 0.3734 | <0.0001 |
| NREP         | 0.916 | 0.3736 | 0.0268  |
| NDUFA3       | 0.769 | 0.3736 | <0.0001 |
| NIPBL        | 0.858 | 0.3736 | <0.0001 |
| CARD18       | 0.776 | 0.3737 | <0.0001 |
| PCGF2        | 0.827 | 0.3737 | <0.0001 |
| LLPH         | 0.857 | 0.3737 | <0.0001 |
| MTMR1        | 0.87  | 0.3737 | <0.0001 |
| SOX2         | 0.877 | 0.3738 | <0.0001 |
| UBE2I        | 0.94  | 0.3739 | 0.0022  |
| MEOX2        | 0.81  | 0.3739 | <0.0001 |
| MIR4642      | 0     | 0.3741 | <0.0001 |
| CPA6         | 0.704 | 0.3741 | <0.0001 |
| DOCK9        | 0.821 | 0.3741 | <0.0001 |

|           |       |        |         |
|-----------|-------|--------|---------|
| GTF3C6    | 0.831 | 0.3741 | <0.0001 |
| PLCD4     | 0.665 | 0.3745 | <0.0001 |
| MED6      | 0.764 | 0.3745 | <0.0001 |
| WDR74     | 0.869 | 0.3745 | <0.0001 |
| SSX4B     | 0.777 | 0.3746 | 0.0012  |
| CYB5RL    | 0.944 | 0.3746 | 0.0103  |
| HYAL3     | 0.777 | 0.3746 | <0.0001 |
| CYP27B1   | 0.868 | 0.3746 | <0.0001 |
| MIIP      | 0.796 | 0.3747 | <0.0001 |
| RPS19P1   | 0.279 | 0.3749 | <0.0001 |
| TIMM10    | 0.791 | 0.3749 | <0.0001 |
| IGSF8     | 0.819 | 0.3749 | <0.0001 |
| FHDC1     | 0.654 | 0.375  | <0.0001 |
| MPPE1     | 0.882 | 0.375  | <0.0001 |
| RANBP9    | 0.778 | 0.3752 | <0.0001 |
| BCAS3     | 0.867 | 0.3752 | <0.0001 |
| ZNF646    | 0.903 | 0.3754 | 0.0002  |
| DDX52     | 0.918 | 0.3754 | 0.0005  |
| GAGE8     | 0.723 | 0.3754 | 0.0013  |
| NOL8      | 0.911 | 0.3755 | 0.0003  |
| FKBP3     | 0.893 | 0.3756 | <0.0001 |
| MOV10     | 0.857 | 0.3757 | 0.0001  |
| MIR4744   | 0     | 0.3758 | <0.0001 |
| ISY1      | 0.89  | 0.3759 | 0.0001  |
| ZBTB37    | 0.893 | 0.3759 | 0.0003  |
| LINC00921 | 0.562 | 0.3759 | 0.0284  |
| FRY-AS1   | 0.851 | 0.3759 | 0.0417  |
| IGDCC4    | 0.689 | 0.3759 | <0.0001 |
| PAPOLG    | 0.822 | 0.3759 | <0.0001 |
| RNF40     | 0.854 | 0.3759 | <0.0001 |
| ZNF516    | 0.916 | 0.3761 | 0.0007  |
| TRMT1L    | 0.652 | 0.3761 | <0.0001 |
| DLX5      | 0.805 | 0.3761 | <0.0001 |



|          |       |        |         |
|----------|-------|--------|---------|
| GTF2F2   | 0.815 | 0.3763 | <0.0001 |
| UNC50    | 0.849 | 0.3764 | <0.0001 |
| LARGE1   | 0.479 | 0.3766 | <0.0001 |
| ZNF420   | 0.725 | 0.3766 | <0.0001 |
| HYLS1    | 0.74  | 0.3766 | <0.0001 |
| RABGAP1  | 0.84  | 0.3766 | <0.0001 |
| ZEB1     | 0.874 | 0.3767 | 0.0004  |
| POLN     | 0.652 | 0.3767 | <0.0001 |
| EIF2S2P4 | 0.427 | 0.3768 | <0.0001 |
| PAPOLA   | 0.879 | 0.3768 | <0.0001 |
| TECPR1   | 0.858 | 0.377  | 0.0004  |
| GTF3C1   | 0.798 | 0.377  | <0.0001 |
| NPRL2    | 0.812 | 0.377  | <0.0001 |
| ZNF716   | 0.737 | 0.3771 | <0.0001 |
| RHOF     | 0.738 | 0.3771 | <0.0001 |
| SERAC1   | 0.77  | 0.3772 | <0.0001 |
| SMAGP    | 0.777 | 0.3772 | <0.0001 |
| MEX3C    | 0.819 | 0.3772 | <0.0001 |
| APPL1    | 0.846 | 0.3772 | <0.0001 |
| ZSCAN22  | 0.849 | 0.3772 | <0.0001 |
| CBY1     | 0.869 | 0.3772 | <0.0001 |
| ZSCAN5A  | 0.689 | 0.3773 | <0.0001 |
| RPL12P37 | 0.417 | 0.3774 | <0.0001 |
| ADPRHL2  | 0.787 | 0.3774 | <0.0001 |
| THSD7A   | 0.83  | 0.3775 | <0.0001 |
| CYCSP39  | 0     | 0.3776 | <0.0001 |
| FADS3    | 0.837 | 0.3777 | <0.0001 |
| CHST14   | 0.85  | 0.3777 | <0.0001 |
| ZBTB3    | 0.851 | 0.3777 | <0.0001 |
| C15orf65 | 0.875 | 0.3778 | 0.0317  |
| MIR4659B | 0.238 | 0.3779 | 0.0246  |
| CAPZA1   | 0.902 | 0.3779 | <0.0001 |
| PRPF38A  | 0.809 | 0.378  | <0.0001 |

|                |       |        |         |
|----------------|-------|--------|---------|
| LOC407835      | 0.851 | 0.3781 | 0.0142  |
| LINC00189      | 0.598 | 0.3781 | <0.0001 |
| UBN1           | 0.923 | 0.3783 | 0.0005  |
| ATP6V0C        | 0.959 | 0.3783 | 0.0151  |
| RPL7AP14       | 0     | 0.3783 | <0.0001 |
| CCDC189        | 0.499 | 0.3783 | <0.0001 |
| RAC1P4         | 0     | 0.3785 | <0.0001 |
| EP300          | 0.909 | 0.3786 | <0.0001 |
| DGKH           | 0.855 | 0.3788 | <0.0001 |
| CGRRF1         | 0.906 | 0.3788 | <0.0001 |
| RNU2-52P       | 0     | 0.3789 | <0.0001 |
| DISP3          | 0     | 0.3789 | <0.0001 |
| UBE2K          | 0.788 | 0.3789 | <0.0001 |
| HS3ST2         | 0.833 | 0.3789 | <0.0001 |
| ZNF648         | 0.738 | 0.379  | <0.0001 |
| ARID1A         | 0.921 | 0.3791 | 0.0002  |
| NPCDR1         | 0.88  | 0.3791 | 0.0024  |
| METTL26        | 0     | 0.3791 | <0.0001 |
| EEA1           | 0.836 | 0.3791 | <0.0001 |
| ACOT9          | 0.889 | 0.3791 | <0.0001 |
| RTEL1-TNFRSF6B | 0.096 | 0.3792 | 0.0045  |
| CORO2A         | 0.891 | 0.3793 | <0.0001 |
| LOC101927604   | 0.188 | 0.3794 | <0.0001 |
| PACRGL         | 0.825 | 0.3796 | 0.0001  |
| MARCKSL1       | 0.871 | 0.3796 | <0.0001 |
| BID            | 0.883 | 0.3796 | <0.0001 |
| UBOX5          | 0.9   | 0.3797 | 0.0001  |
| ATP1B3         | 0.918 | 0.3797 | 0.0002  |
| ENTPD1         | 0.939 | 0.3797 | 0.0008  |
| GEMIN8P4       | 0.602 | 0.3797 | 0.0011  |
| FER1L6         | 0.778 | 0.3797 | <0.0001 |
| KCNMB3         | 0.904 | 0.3798 | <0.0001 |
| HIST1H2BB      | 0.859 | 0.3799 | <0.0001 |

|          |       |        |         |
|----------|-------|--------|---------|
| ZNF385D  | 0.569 | 0.38   | <0.0001 |
| ZNF576   | 0.738 | 0.38   | <0.0001 |
| SIRT4    | 0.77  | 0.38   | <0.0001 |
| GPSM1    | 0.835 | 0.38   | <0.0001 |
| MRPS11   | 0.848 | 0.38   | <0.0001 |
| FNIP1    | 0.887 | 0.3801 | <0.0001 |
| HSPA1A   | 0.887 | 0.3803 | <0.0001 |
| POTEF    | 0.623 | 0.3804 | 0.0002  |
| C12orf56 | 0.688 | 0.3805 | <0.0001 |
| TMEM54   | 0.665 | 0.3807 | <0.0001 |
| TUBB4A   | 0.744 | 0.3807 | <0.0001 |
| TOX4     | 0.807 | 0.3807 | <0.0001 |
| ATP6V0D1 | 0.824 | 0.3807 | <0.0001 |
| CETN3    | 0.898 | 0.3808 | <0.0001 |
| PTGES3L  | 0.754 | 0.3809 | 0.0031  |
| CMC1     | 0.777 | 0.3809 | <0.0001 |
| MFSD11   | 0.871 | 0.3809 | <0.0001 |
| CEP19    | 0.66  | 0.3811 | <0.0001 |
| FIGNL2   | 0.881 | 0.3814 | 0.0083  |
| KRT18P32 | 0     | 0.3814 | <0.0001 |
| TTLL6    | 0.391 | 0.3814 | <0.0001 |
| CLSTN1   | 0.868 | 0.3814 | <0.0001 |
| DKK4     | 0.691 | 0.3815 | <0.0001 |
| NFKB2    | 0.855 | 0.3815 | <0.0001 |
| LETM1    | 0.86  | 0.3817 | <0.0001 |
| HNRNPUL2 | 0.942 | 0.3818 | 0.0053  |
| CCDC61   | 0.782 | 0.3819 | <0.0001 |
| LSM3     | 0.896 | 0.3819 | <0.0001 |
| LIMD1    | 0.797 | 0.3821 | <0.0001 |
| VPS18    | 0.823 | 0.3822 | <0.0001 |
| CYCS     | 0.889 | 0.3822 | <0.0001 |
| ANKRD13B | 0.919 | 0.3823 | 0.0004  |
| SYMPK    | 0.836 | 0.3823 | <0.0001 |

|             |       |        |         |
|-------------|-------|--------|---------|
| GNB2        | 0.841 | 0.3824 | <0.0001 |
| LINC01571   | 0     | 0.3825 | <0.0001 |
| WIPI1       | 0.762 | 0.3825 | <0.0001 |
| SUPT7L      | 0.939 | 0.3826 | 0.0019  |
| SSR4        | 0.852 | 0.3826 | <0.0001 |
| ZNF384      | 0.9   | 0.3827 | 0.0001  |
| HIST1H4K    | 0.737 | 0.383  | <0.0001 |
| FRAT2       | 0.817 | 0.3831 | <0.0001 |
| ZNF826P     | 0.817 | 0.3832 | 0.0034  |
| CKB         | 0.777 | 0.3832 | <0.0001 |
| APOOL       | 0.851 | 0.3832 | <0.0001 |
| ARL1        | 0.907 | 0.3832 | <0.0001 |
| MIR6775     | 0.327 | 0.3834 | <0.0001 |
| SGSM1       | 0.811 | 0.3834 | <0.0001 |
| NFU1        | 0.872 | 0.3834 | <0.0001 |
| PREPL       | 0.874 | 0.3834 | <0.0001 |
| TEAD3       | 0.908 | 0.3835 | 0.0002  |
| ZNF735      | 0.597 | 0.3835 | 0.0013  |
| SMPD4       | 0.837 | 0.3836 | 0.0003  |
| HNRNPK      | 0.85  | 0.3836 | <0.0001 |
| CLASP2      | 0.881 | 0.3836 | <0.0001 |
| SBNO1       | 0.878 | 0.3838 | <0.0001 |
| DCAF15      | 0.602 | 0.3839 | <0.0001 |
| VAMP5       | 0.905 | 0.3841 | 0.0002  |
| RNF144A-AS1 | 0.797 | 0.3842 | 0.0098  |
| RING1       | 0.858 | 0.3842 | <0.0001 |
| PLXNA2      | 0.783 | 0.3843 | <0.0001 |
| AMZ2        | 0.797 | 0.3843 | <0.0001 |
| TMEM80      | 0.833 | 0.3843 | <0.0001 |
| HNRNPM      | 0.926 | 0.3845 | 0.002   |
| PATZ1       | 0.858 | 0.3849 | <0.0001 |
| TUBA3C      | 0.382 | 0.3851 | <0.0001 |
| TBCCD1      | 0.888 | 0.3851 | <0.0001 |

|              |       |        |         |
|--------------|-------|--------|---------|
| EGLN2        | 0.94  | 0.3852 | 0.0014  |
| LOC101928525 | 0     | 0.3852 | <0.0001 |
| SNORD12B     | 0.564 | 0.3853 | 0.0013  |
| GLB1L        | 0.82  | 0.3853 | <0.0001 |
| ZNF782       | 0.853 | 0.3855 | <0.0001 |
| GSS          | 0.804 | 0.3856 | <0.0001 |
| GTF2H1       | 0.895 | 0.3857 | <0.0001 |
| SKP1P2       | 0     | 0.3858 | 0.021   |
| CD24         | 0.879 | 0.3858 | <0.0001 |
| GREB1        | 0.899 | 0.3858 | <0.0001 |
| UPF2         | 0.874 | 0.3861 | <0.0001 |
| LINC00578    | 0.059 | 0.3862 | <0.0001 |
| ARID2        | 0.901 | 0.3863 | 0.0002  |
| NRARP        | 0.679 | 0.3863 | <0.0001 |
| WWP1         | 0.858 | 0.3865 | <0.0001 |
| TNPO2        | 0.861 | 0.3866 | <0.0001 |
| LINC00685    | 0.445 | 0.3867 | <0.0001 |
| FAM193A      | 0.903 | 0.3868 | 0.0004  |
| HAVCR1       | 0.586 | 0.3868 | <0.0001 |
| ZFP37        | 0.72  | 0.3868 | <0.0001 |
| HIST1H2BM    | 0.875 | 0.3868 | <0.0001 |
| STEAP2       | 0.878 | 0.387  | <0.0001 |
| TNPO1        | 0.907 | 0.3872 | 0.0001  |
| ZNF234       | 0.901 | 0.3874 | 0.0007  |
| TIMM17A      | 0.792 | 0.3874 | <0.0001 |
| TMEM41B      | 0.918 | 0.3875 | 0.0005  |
| ZBTB6        | 0.834 | 0.3875 | <0.0001 |
| C8orf89      | 0     | 0.3876 | <0.0001 |
| RPS26P2      | 0.027 | 0.3876 | <0.0001 |
| ZNF407       | 0.897 | 0.3877 | <0.0001 |
| XRCC6P5      | 0.513 | 0.3878 | 0.0257  |
| VN1R48P      | 0     | 0.3879 | <0.0001 |
| GHDC         | 0.814 | 0.388  | <0.0001 |

|          |       |        |         |
|----------|-------|--------|---------|
| PCIF1    | 0.801 | 0.3884 | <0.0001 |
| ENPP4    | 0.858 | 0.3884 | <0.0001 |
| DHX15    | 0.936 | 0.3885 | 0.0004  |
| FAM53A   | 0.763 | 0.3885 | <0.0001 |
| RPS2     | 0.776 | 0.3885 | <0.0001 |
| YBX1     | 0.899 | 0.3886 | 0.0002  |
| TDRD7    | 0.872 | 0.3888 | <0.0001 |
| SALL2    | 0.836 | 0.3892 | <0.0001 |
| UBALD2   | 0.916 | 0.3893 | 0.0404  |
| CASD1    | 0.846 | 0.3893 | <0.0001 |
| RNF215   | 0.875 | 0.3893 | <0.0001 |
| MCCD1P1  | 0     | 0.3897 | <0.0001 |
| SNX22    | 0.743 | 0.3897 | <0.0001 |
| HMGB3    | 0.815 | 0.39   | <0.0001 |
| CIAPIN1  | 0.856 | 0.3902 | <0.0001 |
| ITGB1    | 0.889 | 0.3902 | <0.0001 |
| MAST2    | 0.894 | 0.3903 | <0.0001 |
| MDH1     | 0.821 | 0.3904 | <0.0001 |
| DMXL2    | 0.844 | 0.3905 | <0.0001 |
| NASP     | 0.871 | 0.3905 | <0.0001 |
| FAU      | 0.9   | 0.3905 | <0.0001 |
| BGLAP    | 0.938 | 0.3906 | 0.0057  |
| RXRB     | 0.926 | 0.3907 | 0.0006  |
| PWWP2A   | 0.854 | 0.3907 | <0.0001 |
| DISP2    | 0.797 | 0.3908 | <0.0001 |
| UBL5     | 0.915 | 0.3909 | 0.0003  |
| MDM4     | 0.925 | 0.391  | 0.0001  |
| CCDC117  | 0.967 | 0.3911 | 0.0192  |
| SGTA     | 0.856 | 0.3911 | <0.0001 |
| SCAMP1   | 0.913 | 0.3912 | 0.0002  |
| FLJ46875 | 0.109 | 0.3912 | <0.0001 |
| SHC3     | 0.843 | 0.3912 | <0.0001 |
| ASPSCR1  | 0.854 | 0.3912 | <0.0001 |

|           |       |        |         |
|-----------|-------|--------|---------|
| ADAMTS9   | 0.895 | 0.3912 | <0.0001 |
| LOC349160 | 0.078 | 0.3913 | 0.0001  |
| FAM131A   | 0.819 | 0.3918 | <0.0001 |
| STK38     | 0.907 | 0.3918 | <0.0001 |
| SREK1IP1  | 0.809 | 0.3919 | <0.0001 |
| ATL2      | 0.92  | 0.392  | 0.0013  |
| FAM114A2  | 0.798 | 0.392  | <0.0001 |
| CD151     | 0.862 | 0.392  | <0.0001 |
| ASCC3     | 0.851 | 0.3921 | <0.0001 |
| MIR4677   | 0.502 | 0.3922 | 0.0129  |
| FMO1      | 0.797 | 0.3922 | <0.0001 |
| LINC01006 | 0.423 | 0.3923 | <0.0001 |
| CDC20B    | 0.787 | 0.3923 | <0.0001 |
| NAA50     | 0.821 | 0.3923 | <0.0001 |
| ZBED5-AS1 | 0.766 | 0.3927 | 0.0098  |
| BFAR      | 0.878 | 0.3927 | <0.0001 |
| GAS8      | 0.923 | 0.3929 | 0.0001  |
| PRELID1P3 | 0     | 0.3929 | <0.0001 |
| NFE2L1    | 0.866 | 0.3929 | <0.0001 |
| NOP9      | 0.92  | 0.393  | 0.0496  |
| SVIP      | 0.845 | 0.3931 | 0.0002  |
| PAGE1     | 0.31  | 0.3931 | <0.0001 |
| PGLS      | 0.723 | 0.3931 | <0.0001 |
| ATP13A2   | 0.779 | 0.3931 | <0.0001 |
| TRMT5     | 0.855 | 0.3931 | <0.0001 |
| UMPS      | 0.916 | 0.3932 | 0.0002  |
| COPRS     | 0.889 | 0.3932 | 0.0207  |
| PSTK      | 0.853 | 0.3932 | <0.0001 |
| GTF2H3    | 0.867 | 0.3933 | <0.0001 |
| RPSAP52   | 0.627 | 0.3935 | 0.0007  |
| SLC22A15  | 0.696 | 0.3935 | <0.0001 |
| FOXP4     | 0.854 | 0.3935 | <0.0001 |
| ZCCHC7    | 0.859 | 0.3937 | <0.0001 |

|              |       |        |         |
|--------------|-------|--------|---------|
| THUMPD2      | 0.822 | 0.3938 | <0.0001 |
| LOC101928333 | 0     | 0.3939 | <0.0001 |
| MPZ          | 0.716 | 0.3939 | <0.0001 |
| YIPF6        | 0.877 | 0.3939 | <0.0001 |
| MIR5697      | 0     | 0.3941 | <0.0001 |
| CEACAM20     | 0.576 | 0.3941 | <0.0001 |
| CNNM1        | 0.691 | 0.3941 | <0.0001 |
| TJP1         | 0.873 | 0.3941 | <0.0001 |
| ZNF273       | 0.868 | 0.3942 | <0.0001 |
| ENPP2        | 0.929 | 0.3943 | 0.0002  |
| EGF          | 0.814 | 0.3945 | <0.0001 |
| ARL17B       | 0.82  | 0.3946 | 0.0005  |
| SAMD10       | 0.879 | 0.3947 | <0.0001 |
| XPO4         | 0.891 | 0.3947 | <0.0001 |
| TRAV8-5      | 0     | 0.3948 | <0.0001 |
| HAUS6        | 0.861 | 0.3951 | <0.0001 |
| RNF121       | 0.899 | 0.3952 | <0.0001 |
| LINC00519    | 0.639 | 0.3953 | 0.0375  |
| SCD          | 0.826 | 0.3953 | <0.0001 |
| IKBKE        | 0.879 | 0.3953 | <0.0001 |
| DNAAF2       | 0.635 | 0.3954 | <0.0001 |
| NDST1        | 0.921 | 0.3955 | 0.0002  |
| PAAF1        | 0.758 | 0.3955 | <0.0001 |
| PPM1L        | 0.725 | 0.3956 | <0.0001 |
| DHDDS        | 0.809 | 0.3956 | <0.0001 |
| MAPKAPK3     | 0.87  | 0.3957 | <0.0001 |
| CLCNKA       | 0.884 | 0.3958 | 0.0002  |
| GSKIP        | 0.764 | 0.3961 | 0.001   |
| GADD45GIP1   | 0.819 | 0.3961 | <0.0001 |
| USP19        | 0.824 | 0.3961 | <0.0001 |
| OGT          | 0.946 | 0.3962 | 0.0018  |
| ATP6V0E2-AS1 | 0.546 | 0.3962 | <0.0001 |
| RNU6-315P    | 0.282 | 0.3963 | <0.0001 |



|              |       |        |         |
|--------------|-------|--------|---------|
| MCTP1        | 0.82  | 0.3963 | <0.0001 |
| HSPE1        | 0.889 | 0.3964 | <0.0001 |
| FRRS1L       | 0.296 | 0.3966 | <0.0001 |
| SETMAR       | 0.679 | 0.3967 | <0.0001 |
| LLGL2        | 0.901 | 0.3967 | <0.0001 |
| TRIL         | 0.902 | 0.3968 | 0.0034  |
| UFSP1        | 0.782 | 0.3968 | <0.0001 |
| SLC16A12-AS1 | 0.476 | 0.3969 | <0.0001 |
| TRMT61A      | 0.827 | 0.3969 | <0.0001 |
| VRK2         | 0.877 | 0.3969 | <0.0001 |
| PHLDA2       | 0.911 | 0.3972 | <0.0001 |
| ZNF343       | 0.927 | 0.3974 | 0.0005  |
| C17orf49     | 0.918 | 0.3974 | 0.0043  |
| SLC4A11      | 0.813 | 0.3974 | <0.0001 |
| RPS17P2      | 0     | 0.3975 | <0.0001 |
| ZNF382       | 0.774 | 0.3975 | <0.0001 |
| RAB40B       | 0.776 | 0.3975 | <0.0001 |
| RFPL4B       | 0.6   | 0.3976 | <0.0001 |
| LMCD1-AS1    | 0.544 | 0.3977 | 0.0188  |
| NKAPP1       | 0.732 | 0.3978 | 0.0004  |
| PGAP2        | 0.785 | 0.3978 | <0.0001 |
| OR2W6P       | 0.484 | 0.3979 | <0.0001 |
| ETAA1        | 0.851 | 0.398  | <0.0001 |
| ZNF43        | 0.858 | 0.398  | <0.0001 |
| TBX4         | 0.649 | 0.3981 | <0.0001 |
| ANGPT1       | 0.846 | 0.3981 | <0.0001 |
| ATG3         | 0.896 | 0.3981 | <0.0001 |
| VN1R42P      | 0     | 0.3982 | <0.0001 |
| RPL7AP60     | 0.404 | 0.3983 | <0.0001 |
| FKBP4        | 0.682 | 0.3984 | <0.0001 |
| YIPF1        | 0.744 | 0.3984 | <0.0001 |
| ILK          | 0.964 | 0.3989 | 0.0095  |
| DLEU2L       | 0.924 | 0.3992 | 0.0015  |

|              |       |        |         |
|--------------|-------|--------|---------|
| SUGP2        | 0.955 | 0.3992 | 0.0335  |
| LOC441722    | 0.496 | 0.3992 | <0.0001 |
| GPN2         | 0.866 | 0.3994 | <0.0001 |
| BAGE2        | 0.825 | 0.3997 | 0.0002  |
| SNX18P23     | 0     | 0.3997 | <0.0001 |
| BANF2        | 0.868 | 0.3999 | <0.0001 |
| URGCP-MRPS24 | 0     | 0.4    | 0.0034  |
| FAM13C       | 0.791 | 0.4001 | <0.0001 |
| POLRMT       | 0.825 | 0.4001 | <0.0001 |
| NRBP2        | 0.929 | 0.4002 | 0.0054  |
| SNORD56      | 0.752 | 0.4004 | 0.0101  |
| DLEU7-AS1    | 0.631 | 0.4005 | 0.0288  |
| ZNF263       | 0.735 | 0.4005 | <0.0001 |
| L3MBTL1      | 0.893 | 0.4006 | 0.0015  |
| RBBP8        | 0.91  | 0.4006 | <0.0001 |
| TRAPPC3      | 0.759 | 0.4007 | <0.0001 |
| WDR41        | 0.823 | 0.4007 | <0.0001 |
| TBP          | 0.909 | 0.4007 | <0.0001 |
| RTN2         | 0.888 | 0.4008 | <0.0001 |
| EGLN3-AS1    | 0.395 | 0.401  | <0.0001 |
| ZSCAN20      | 0.796 | 0.401  | <0.0001 |
| PDE1C        | 0.854 | 0.401  | <0.0001 |
| PABPC1P2     | 0.407 | 0.4012 | <0.0001 |
| PABPC4       | 0.801 | 0.4014 | <0.0001 |
| LOC440300    | 0.416 | 0.4016 | <0.0001 |
| HOXC9        | 0.673 | 0.4016 | <0.0001 |
| LCLAT1       | 0.86  | 0.4016 | <0.0001 |
| GNG10        | 0.965 | 0.4017 | 0.0301  |
| STK11IP      | 0.712 | 0.4017 | <0.0001 |
| ABHD3        | 0.817 | 0.4018 | <0.0001 |
| HEIH         | 0.847 | 0.4019 | 0.0336  |
| CDHR3        | 0.789 | 0.4019 | <0.0001 |
| LYAR         | 0.835 | 0.402  | <0.0001 |

|              |       |        |         |
|--------------|-------|--------|---------|
| C3orf67      | 0.699 | 0.4021 | <0.0001 |
| TMEM42       | 0.722 | 0.4021 | <0.0001 |
| PDS5A        | 0.816 | 0.4021 | <0.0001 |
| TP73         | 0.921 | 0.4023 | 0.0002  |
| GBA2         | 0.932 | 0.4023 | 0.0007  |
| INTS9        | 0.586 | 0.4023 | <0.0001 |
| POLR2I       | 0.903 | 0.4024 | 0.0002  |
| LINC00471    | 0.745 | 0.4027 | 0.0007  |
| RNU6-1266P   | 0.646 | 0.4028 | 0.039   |
| HNRNPL       | 0.82  | 0.403  | <0.0001 |
| ZNF490       | 0.968 | 0.4031 | 0.0295  |
| LOC100289361 | 0.444 | 0.4031 | <0.0001 |
| CHPF2        | 0.779 | 0.4031 | <0.0001 |
| UCKL1        | 0.838 | 0.4031 | <0.0001 |
| RIMS3        | 0.863 | 0.4033 | <0.0001 |
| KRT8P45      | 0     | 0.4034 | <0.0001 |
| WNT5A        | 0.826 | 0.4035 | <0.0001 |
| DPH5         | 0.842 | 0.4038 | <0.0001 |
| SDC2         | 0.89  | 0.404  | <0.0001 |
| MYPOP        | 0.842 | 0.4041 | <0.0001 |
| VCAN         | 0.816 | 0.4042 | <0.0001 |
| NDUFA4       | 0.905 | 0.4043 | <0.0001 |
| IBSP         | 0.919 | 0.4043 | <0.0001 |
| SGSM3        | 0.903 | 0.4044 | 0.0001  |
| FHL3         | 0.879 | 0.4047 | <0.0001 |
| NME2P1       | 0.883 | 0.405  | 0.0322  |
| SFMBT1       | 0.888 | 0.405  | <0.0001 |
| RAD51D       | 0.669 | 0.4052 | <0.0001 |
| IGSF21       | 0.879 | 0.4052 | <0.0001 |
| C22orf46     | 0.561 | 0.4053 | <0.0001 |
| AKR1C2       | 0.838 | 0.4053 | <0.0001 |
| RAB3A        | 0.832 | 0.4054 | <0.0001 |
| RPS27        | 0.894 | 0.4054 | <0.0001 |

|          |       |        |         |
|----------|-------|--------|---------|
| TMEM117  | 0.8   | 0.4055 | <0.0001 |
| EML4     | 0.846 | 0.4055 | <0.0001 |
| MARCKS   | 0.916 | 0.4055 | <0.0001 |
| TBC1D19  | 0.766 | 0.4056 | <0.0001 |
| KCTD3    | 0.805 | 0.4056 | <0.0001 |
| PPFIA3   | 0.851 | 0.4056 | <0.0001 |
| DNAH12   | 0.563 | 0.4057 | <0.0001 |
| TRMT2B   | 0.796 | 0.4057 | <0.0001 |
| SERF2    | 0.905 | 0.4058 | 0.001   |
| MAP7D2   | 0.774 | 0.4058 | <0.0001 |
| GOLM1    | 0.812 | 0.4058 | <0.0001 |
| ZNF512B  | 0.897 | 0.4058 | <0.0001 |
| STOX1    | 0.752 | 0.4059 | <0.0001 |
| CLCC1    | 0.858 | 0.4062 | <0.0001 |
| PPIL2    | 0.891 | 0.4062 | <0.0001 |
| ZNF99    | 0.633 | 0.4064 | <0.0001 |
| SMIM11A  | 0     | 0.4065 | <0.0001 |
| RFESD    | 0.85  | 0.4065 | <0.0001 |
| PLA2G7   | 0.892 | 0.4065 | <0.0001 |
| LRRC61   | 0.585 | 0.4066 | <0.0001 |
| KIAA0556 | 0.857 | 0.4066 | <0.0001 |
| AP3M1    | 0.891 | 0.4066 | <0.0001 |
| DPP8     | 0.896 | 0.4066 | <0.0001 |
| MIR4766  | 0.151 | 0.4067 | <0.0001 |
| PSME2    | 0.851 | 0.4067 | <0.0001 |
| SNAPC2   | 0.912 | 0.4067 | <0.0001 |
| ME1      | 0.68  | 0.4068 | <0.0001 |
| FBXW10   | 0.731 | 0.4068 | <0.0001 |
| DCTN5    | 0.828 | 0.407  | <0.0001 |
| DDIT3    | 0.766 | 0.4071 | <0.0001 |
| BIN1     | 0.85  | 0.4071 | <0.0001 |
| SLC25A33 | 0.665 | 0.4072 | <0.0001 |
| PDIA4    | 0.737 | 0.4072 | <0.0001 |

|            |       |        |         |
|------------|-------|--------|---------|
| CRACR2B    | 0.531 | 0.4073 | 0.0486  |
| NOL6       | 0.86  | 0.4073 | <0.0001 |
| MPLKIP     | 0.725 | 0.4074 | 0.0002  |
| LINC00221  | 0.886 | 0.4074 | 0.0137  |
| SPATA5     | 0.844 | 0.4074 | <0.0001 |
| TMEM223    | 0.879 | 0.4075 | 0.0005  |
| RAB35      | 0.792 | 0.4075 | <0.0001 |
| MRPL50     | 0.806 | 0.4075 | <0.0001 |
| DPM1       | 0.88  | 0.4075 | <0.0001 |
| NIPA1      | 0.775 | 0.4077 | <0.0001 |
| QPCTL      | 0.884 | 0.4077 | <0.0001 |
| AGRN       | 0.82  | 0.4079 | <0.0001 |
| TIMM44     | 0.856 | 0.4079 | <0.0001 |
| HPDL       | 0.833 | 0.408  | <0.0001 |
| GIT2       | 0.955 | 0.4081 | 0.0017  |
| TMIE       | 0.726 | 0.4081 | <0.0001 |
| MRPL52     | 0.885 | 0.4081 | <0.0001 |
| LINC01416  | 0.443 | 0.4083 | <0.0001 |
| KCNMA1-AS3 | 0     | 0.4085 | <0.0001 |
| ZNF2       | 0.89  | 0.4086 | 0.0002  |
| WSCD1      | 0.831 | 0.4086 | <0.0001 |
| LMTK2      | 0.911 | 0.4086 | <0.0001 |
| POTEE      | 0.847 | 0.4087 | 0.0141  |
| BDKRB1     | 0.836 | 0.4087 | <0.0001 |
| TNIP2      | 0.853 | 0.4087 | <0.0001 |
| SOCS7      | 0.914 | 0.4088 | 0.0003  |
| NPFFR2     | 0.735 | 0.4088 | <0.0001 |
| SLC44A3    | 0.85  | 0.409  | <0.0001 |
| ZNF503-AS2 | 0.899 | 0.4093 | 0.0332  |
| FOXN2      | 0.841 | 0.4094 | <0.0001 |
| MLH1       | 0.893 | 0.4094 | <0.0001 |
| MSANTD3    | 0.793 | 0.4095 | 0.001   |
| MNX1-AS2   | 0.188 | 0.4095 | <0.0001 |

|            |       |        |         |
|------------|-------|--------|---------|
| RTN4IP1    | 0.783 | 0.4096 | <0.0001 |
| IL4I1      | 0.84  | 0.4096 | <0.0001 |
| DENND6A    | 0.812 | 0.4098 | 0.0023  |
| SLC35E1    | 0.861 | 0.4098 | <0.0001 |
| MIR181A2HG | 0.372 | 0.4099 | <0.0001 |
| PPP2R2C    | 0.798 | 0.4099 | <0.0001 |
| SLCO1C1    | 0.883 | 0.4099 | <0.0001 |
| MAP1B      | 0.86  | 0.41   | <0.0001 |
| CTBP1      | 0.731 | 0.4102 | <0.0001 |
| EFR3A      | 0.834 | 0.4102 | <0.0001 |
| DAZAP1     | 0.85  | 0.4103 | <0.0001 |
| CTR9       | 0.89  | 0.4103 | <0.0001 |
| ETV3       | 0.925 | 0.4103 | <0.0001 |
| TMEM179B   | 0.911 | 0.4104 | 0.0067  |
| ZNF525     | 0.655 | 0.4104 | <0.0001 |
| DNTTIP2    | 0.894 | 0.4104 | <0.0001 |
| GAGE12G    | 0.805 | 0.4106 | 0.0023  |
| ATXN2L     | 0.942 | 0.4107 | 0.0004  |
| DEPTOR     | 0.836 | 0.4109 | 0.0001  |
| ZBTB24     | 0.817 | 0.4109 | <0.0001 |
| LINC01251  | 0     | 0.411  | <0.0001 |
| SLC16A3    | 0.771 | 0.4111 | <0.0001 |
| HOMER1     | 0.78  | 0.4111 | <0.0001 |
| RNF24      | 0.771 | 0.4113 | <0.0001 |
| LOC728752  | 0.793 | 0.4114 | 0.0109  |
| INPP5F     | 0.907 | 0.4114 | <0.0001 |
| FEZF1-AS1  | 0.65  | 0.4116 | 0.0264  |
| PNKD       | 0.887 | 0.4116 | <0.0001 |
| CCZ1       | 0.791 | 0.4118 | <0.0001 |
| SENP5      | 0.895 | 0.4118 | <0.0001 |
| MRPL22     | 0.832 | 0.4119 | <0.0001 |
| LINC01331  | 0.407 | 0.4121 | <0.0001 |
| SLC26A3    | 0.724 | 0.4121 | <0.0001 |

|            |       |        |         |
|------------|-------|--------|---------|
| GAGE5      | 0.81  | 0.4123 | 0.0055  |
| PSMG4      | 0.78  | 0.4123 | <0.0001 |
| CLTCL1     | 0.835 | 0.4123 | <0.0001 |
| DYNC1I2    | 0.856 | 0.4123 | <0.0001 |
| PTGFR      | 0.838 | 0.4125 | <0.0001 |
| SGTB       | 0.801 | 0.4126 | <0.0001 |
| MEPCE      | 0.797 | 0.4128 | <0.0001 |
| GPR160     | 0.832 | 0.4128 | <0.0001 |
| SRI        | 0.894 | 0.4128 | <0.0001 |
| ZNF616     | 0.726 | 0.4129 | <0.0001 |
| PIGO       | 0.789 | 0.4129 | <0.0001 |
| PTOV1-AS1  | 0.818 | 0.4131 | 0.0154  |
| ISCA2P1    | 0     | 0.4131 | <0.0001 |
| UBP1       | 0.847 | 0.4131 | <0.0001 |
| SUMF2      | 0.886 | 0.4131 | <0.0001 |
| PAGE2B     | 0.619 | 0.4132 | <0.0001 |
| ARHGDI1A   | 0.888 | 0.4132 | <0.0001 |
| EGFL6      | 0.84  | 0.4133 | <0.0001 |
| HNRNPA1P27 | 0     | 0.4134 | <0.0001 |
| PEAK1      | 0.755 | 0.4134 | <0.0001 |
| FBXO30     | 0.807 | 0.4134 | <0.0001 |
| GART       | 0.918 | 0.4136 | <0.0001 |
| TMEM45B    | 0.797 | 0.4139 | <0.0001 |
| CDK2AP2    | 0.884 | 0.4139 | <0.0001 |
| GPR35      | 0.663 | 0.414  | <0.0001 |
| ZNF761     | 0.82  | 0.414  | <0.0001 |
| KIFC2      | 0.915 | 0.4141 | 0.0003  |
| TYRO3      | 0.878 | 0.4141 | <0.0001 |
| RAB1A      | 0.888 | 0.4141 | <0.0001 |
| BTN2A1     | 0.907 | 0.4142 | <0.0001 |
| FBXW11     | 0.846 | 0.4143 | <0.0001 |
| KIAA1586   | 0.897 | 0.4143 | <0.0001 |
| TTC33      | 0.902 | 0.4144 | <0.0001 |

|              |       |        |         |
|--------------|-------|--------|---------|
| SLC12A8      | 0.65  | 0.4146 | <0.0001 |
| ACTL10       | 0.897 | 0.4147 | 0.0073  |
| PCDHB10      | 0.574 | 0.4147 | <0.0001 |
| PPP1R8       | 0.885 | 0.4147 | <0.0001 |
| WIPI2        | 0.888 | 0.4147 | <0.0001 |
| MIR103B2     | 0     | 0.4148 | 0.0132  |
| ASB6         | 0.881 | 0.4148 | <0.0001 |
| AIF1L        | 0.836 | 0.4149 | <0.0001 |
| LOC644656    | 0.702 | 0.415  | 0.0011  |
| TMEM266      | 0.521 | 0.4151 | 0.0399  |
| POMZP3       | 0.829 | 0.4151 | <0.0001 |
| HOMER3       | 0.86  | 0.4151 | <0.0001 |
| CLP1         | 0.874 | 0.4152 | <0.0001 |
| CBLN1        | 0.892 | 0.4154 | <0.0001 |
| PIGN         | 0.85  | 0.4157 | <0.0001 |
| LOC100996756 | 0.534 | 0.4158 | 0.0003  |
| TXNL1        | 0.89  | 0.4158 | <0.0001 |
| SRGAP1       | 0.674 | 0.4159 | <0.0001 |
| SLC25A24P1   | 0     | 0.416  | <0.0001 |
| ARHGEF28     | 0.667 | 0.416  | <0.0001 |
| TP53RK       | 0.759 | 0.416  | <0.0001 |
| IQSEC1       | 0.88  | 0.4162 | <0.0001 |
| NOSIP        | 0.811 | 0.4163 | <0.0001 |
| LOC100506804 | 0.272 | 0.4164 | 0.0076  |
| TRIQQ        | 0.638 | 0.4167 | 0.0002  |
| JADE3        | 0.746 | 0.4168 | 0.0003  |
| SMUG1        | 0.719 | 0.4168 | <0.0001 |
| POMGNT2      | 0.616 | 0.4169 | 0.0002  |
| HIST1H2BD    | 0.877 | 0.4171 | <0.0001 |
| TRMT10C      | 0.777 | 0.4172 | 0.0009  |
| FAM8A6P      | 0     | 0.4172 | <0.0001 |
| MEGF8        | 0.829 | 0.4172 | <0.0001 |
| LHX4         | 0.854 | 0.4173 | <0.0001 |



|           |       |        |         |
|-----------|-------|--------|---------|
| TMA16     | 0.805 | 0.4174 | 0.0004  |
| BCAM      | 0.843 | 0.4174 | <0.0001 |
| TMEM131   | 0.795 | 0.4175 | <0.0001 |
| LINC00662 | 0.16  | 0.4176 | <0.0001 |
| NKD1      | 0.659 | 0.4176 | <0.0001 |
| PCDHB2    | 0.714 | 0.4176 | <0.0001 |
| RNPEPL1   | 0.794 | 0.4178 | <0.0001 |
| USP42     | 0.862 | 0.4178 | <0.0001 |
| CCDC28B   | 0.873 | 0.4179 | <0.0001 |
| SETD4     | 0.925 | 0.4181 | 0.0003  |
| POLR3G    | 0.796 | 0.4181 | <0.0001 |
| SLMAP     | 0.799 | 0.4181 | <0.0001 |
| TTC4      | 0.97  | 0.4182 | 0.0416  |
| TSR2      | 0.832 | 0.4182 | <0.0001 |
| NANP      | 0.852 | 0.4182 | <0.0001 |
| FAM169A   | 0.864 | 0.4183 | <0.0001 |
| DAPK3     | 0.745 | 0.4184 | <0.0001 |
| SLC35B4   | 0.869 | 0.4185 | <0.0001 |
| STK24     | 0.905 | 0.4185 | <0.0001 |
| LYRM2     | 0.844 | 0.4187 | <0.0001 |
| CD2BP2    | 0.905 | 0.4187 | <0.0001 |
| FDFT1     | 0.85  | 0.4188 | <0.0001 |
| ARHGAP22  | 0.873 | 0.4189 | <0.0001 |
| CNTNAP4   | 0.847 | 0.4191 | <0.0001 |
| DCLRE1A   | 0.86  | 0.4193 | <0.0001 |
| DYNLT3P2  | 0     | 0.4194 | <0.0001 |
| EIF2B5    | 0.848 | 0.4194 | <0.0001 |
| BBX       | 0.726 | 0.4195 | <0.0001 |
| TMEM255A  | 0.762 | 0.4195 | <0.0001 |
| PTK7      | 0.828 | 0.4195 | <0.0001 |
| LCORL     | 0.88  | 0.4196 | <0.0001 |
| RBMXP1    | 0     | 0.4197 | <0.0001 |
| TMEM62    | 0.884 | 0.4198 | <0.0001 |

|              |       |        |         |
|--------------|-------|--------|---------|
| SMARCD2      | 0.837 | 0.4199 | <0.0001 |
| ERCC1        | 0.865 | 0.4199 | <0.0001 |
| PAGE2        | 0.272 | 0.42   | <0.0001 |
| ZNF350-AS1   | 0.331 | 0.42   | <0.0001 |
| INTS5        | 0.808 | 0.42   | <0.0001 |
| LINC01143    | 0.344 | 0.4203 | <0.0001 |
| PCOLCE2      | 0.766 | 0.4204 | <0.0001 |
| MRPS33       | 0.843 | 0.4205 | <0.0001 |
| SNCG         | 0.927 | 0.4207 | 0.0002  |
| TMED7-TICAM2 | 0.778 | 0.4207 | 0.0126  |
| PDZK1IP1     | 0.742 | 0.4207 | <0.0001 |
| PRR12        | 0.472 | 0.4208 | <0.0001 |
| SLC6A10P     | 0.695 | 0.4209 | 0.0001  |
| PLPP7        | 0     | 0.4209 | <0.0001 |
| MVP          | 0.845 | 0.421  | <0.0001 |
| CAND1        | 0.91  | 0.421  | <0.0001 |
| TRIM33       | 0.92  | 0.4211 | 0.0001  |
| LINC01428    | 0.822 | 0.4212 | 0.0167  |
| PRR19        | 0.811 | 0.4213 | <0.0001 |
| GPX7         | 0.82  | 0.4213 | <0.0001 |
| TNNC1        | 0.842 | 0.4213 | <0.0001 |
| LANCL2       | 0.795 | 0.4216 | <0.0001 |
| MMD          | 0.88  | 0.4216 | <0.0001 |
| RPS12        | 0.824 | 0.4217 | <0.0001 |
| FBXL20       | 0.873 | 0.4217 | <0.0001 |
| ATE1-AS1     | 0     | 0.4218 | <0.0001 |
| TOP3B        | 0.825 | 0.4219 | <0.0001 |
| MRPL15       | 0.905 | 0.4219 | <0.0001 |
| FLNC         | 0.745 | 0.422  | <0.0001 |
| ZNF252P-AS1  | 0.656 | 0.4222 | <0.0001 |
| WRB          | 0.874 | 0.4222 | <0.0001 |
| HYKK         | 0.714 | 0.4223 | <0.0001 |
| HTR4         | 0.873 | 0.4223 | <0.0001 |

|              |       |        |         |
|--------------|-------|--------|---------|
| FSTL4        | 0.94  | 0.4224 | 0.0003  |
| IDE          | 0.898 | 0.4226 | <0.0001 |
| WDR4         | 0.899 | 0.4226 | <0.0001 |
| POLH         | 0.926 | 0.4228 | 0.0003  |
| BBS10        | 0.894 | 0.4228 | <0.0001 |
| SUN1         | 0.833 | 0.4229 | <0.0001 |
| ZSCAN12      | 0.751 | 0.4232 | <0.0001 |
| LOC101928837 | 0.246 | 0.4233 | <0.0001 |
| EIF4G3       | 0.87  | 0.4234 | <0.0001 |
| MAGOHB       | 0.878 | 0.4235 | <0.0001 |
| LINC01605    | 0.366 | 0.4236 | <0.0001 |
| BRCC3        | 0.801 | 0.4237 | <0.0001 |
| CNPY4        | 0.896 | 0.4237 | <0.0001 |
| RPL7AP8      | 0.177 | 0.4238 | <0.0001 |
| GOLGA6L9     | 0.627 | 0.4238 | <0.0001 |
| C19orf44     | 0.796 | 0.4238 | <0.0001 |
| YME1L1       | 0.924 | 0.4239 | 0.0001  |
| HNF1A        | 0.833 | 0.4239 | <0.0001 |
| LINC01170    | 0.49  | 0.424  | <0.0001 |
| CXorf40A     | 0.884 | 0.4241 | <0.0001 |
| UBE2E1       | 0.862 | 0.4242 | <0.0001 |
| SF3B5        | 0.834 | 0.4245 | <0.0001 |
| POTEM        | 0.548 | 0.4246 | <0.0001 |
| ZC3H11A      | 0.96  | 0.4248 | 0.0148  |
| UBE4B        | 0.839 | 0.4249 | <0.0001 |
| ZNF517       | 0.921 | 0.4251 | 0.0009  |
| SPTSSA       | 0.7   | 0.4251 | <0.0001 |
| ABL1         | 0.817 | 0.4251 | <0.0001 |
| ZC3HAV1      | 0.836 | 0.4251 | <0.0001 |
| RBM14-RBM4   | 0.665 | 0.4253 | 0.0124  |
| BCAS1        | 0.854 | 0.4254 | <0.0001 |
| AMDHD2       | 0.876 | 0.4254 | <0.0001 |
| C1QTNF3      | 0.83  | 0.4255 | <0.0001 |

|           |       |        |         |
|-----------|-------|--------|---------|
| RSL24D1P6 | 0.368 | 0.4256 | <0.0001 |
| SEC11C    | 0.755 | 0.4256 | <0.0001 |
| NCDN      | 0.857 | 0.4256 | <0.0001 |
| PAK4      | 0.887 | 0.4256 | <0.0001 |
| SMKR1     | 0.88  | 0.4257 | 0.0192  |
| WNK1      | 0.853 | 0.4258 | <0.0001 |
| LINC01546 | 0.329 | 0.4259 | <0.0001 |
| SNTB1     | 0.832 | 0.426  | <0.0001 |
| SS18L2    | 0.812 | 0.4261 | <0.0001 |
| PRPF40B   | 0.825 | 0.4263 | <0.0001 |
| MOGAT3    | 0.752 | 0.4265 | <0.0001 |
| MPPED2    | 0.817 | 0.4266 | <0.0001 |
| LINC01242 | 0.883 | 0.4267 | 0.046   |
| PPP1R13L  | 0.733 | 0.4267 | <0.0001 |
| EPHB2     | 0.879 | 0.4268 | <0.0001 |
| MIR6865   | 0     | 0.4269 | <0.0001 |
| CEP290    | 0.834 | 0.4269 | <0.0001 |
| PDLIM7    | 0.867 | 0.4271 | <0.0001 |
| MRPL33    | 0.883 | 0.4272 | <0.0001 |
| HOMEZ     | 0.909 | 0.4273 | <0.0001 |
| SEC61B    | 0.912 | 0.4273 | <0.0001 |
| AP1S3     | 0.82  | 0.4274 | <0.0001 |
| KRT8P12   | 0.85  | 0.4276 | 0.0005  |
| SNX15     | 0.971 | 0.4276 | 0.0186  |
| KRT20     | 0.84  | 0.4276 | <0.0001 |
| SYP       | 0.901 | 0.4276 | <0.0001 |
| GNL3      | 0.936 | 0.4279 | 0.0005  |
| UBLCP1    | 0.859 | 0.4279 | <0.0001 |
| ZNF319    | 0.825 | 0.4281 | <0.0001 |
| LOC440434 | 0.768 | 0.4283 | <0.0001 |
| UBAC2     | 0.752 | 0.4286 | <0.0001 |
| VAC14     | 0.843 | 0.4286 | <0.0001 |
| FBXL22    | 0.872 | 0.4287 | <0.0001 |

|              |       |        |         |
|--------------|-------|--------|---------|
| LOC100505715 | 0.612 | 0.4288 | 0.0466  |
| PLCB3        | 0.816 | 0.4288 | <0.0001 |
| TRIM39       | 0.918 | 0.4289 | 0.0015  |
| GLTP         | 0.851 | 0.4289 | <0.0001 |
| ARHGAP12     | 0.856 | 0.429  | <0.0001 |
| ZNF91        | 0.876 | 0.429  | <0.0001 |
| HIST1H1E     | 0.901 | 0.429  | <0.0001 |
| RELL2        | 0.863 | 0.4291 | <0.0001 |
| SPHAR        | 0.858 | 0.4292 | 0.0016  |
| TMEM19       | 0.822 | 0.4292 | <0.0001 |
| TMEM233      | 0.788 | 0.4293 | 0.0002  |
| CCDC59       | 0.827 | 0.4293 | <0.0001 |
| SMOX         | 0.89  | 0.4293 | <0.0001 |
| C15orf48     | 0.841 | 0.4294 | <0.0001 |
| OSER1        | 0.88  | 0.4296 | 0.0036  |
| ZNF213       | 0.833 | 0.4296 | <0.0001 |
| DNAJC10      | 0.876 | 0.4296 | <0.0001 |
| RNU4-55P     | 0     | 0.4297 | 0.0062  |
| HSPA12B      | 0.835 | 0.4297 | <0.0001 |
| GTF2H2B      | 0.853 | 0.4298 | 0.0016  |
| STXBP5       | 0.773 | 0.4298 | <0.0001 |
| PRAF2        | 0.927 | 0.4299 | 0.0002  |
| PMS2P3       | 0.936 | 0.43   | 0.0418  |
| LZTS2        | 0.739 | 0.43   | <0.0001 |
| ATRN         | 0.853 | 0.43   | <0.0001 |
| CTDSPL2      | 0.875 | 0.4301 | <0.0001 |
| KDM3A        | 0.837 | 0.4302 | <0.0001 |
| FGF12        | 0.856 | 0.4302 | <0.0001 |
| TUBA1A       | 0.921 | 0.4303 | 0.0001  |
| CNPPD1       | 0.74  | 0.4305 | <0.0001 |
| MEN1         | 0.911 | 0.4305 | <0.0001 |
| HIST1H4B     | 0.917 | 0.4306 | 0.0008  |
| CHCHD7       | 0.834 | 0.4307 | <0.0001 |

|            |       |        |         |
|------------|-------|--------|---------|
| COMMD10    | 0.847 | 0.4307 | <0.0001 |
| KBTBD2     | 0.855 | 0.4307 | <0.0001 |
| ITGA7      | 0.92  | 0.4307 | <0.0001 |
| ZNF286A    | 0.882 | 0.4308 | <0.0001 |
| MIR9-3HG   | 0.405 | 0.431  | <0.0001 |
| HIST1H4J   | 0.79  | 0.4313 | <0.0001 |
| MRAS       | 0.806 | 0.4313 | <0.0001 |
| LGALS8-AS1 | 0.878 | 0.4314 | 0.0101  |
| YDJC       | 0.765 | 0.4316 | <0.0001 |
| TSEN34     | 0.838 | 0.4316 | <0.0001 |
| SAP30      | 0.861 | 0.4316 | <0.0001 |
| LINC00348  | 0.464 | 0.4317 | <0.0001 |
| COL11A1    | 0.807 | 0.432  | <0.0001 |
| ADGRB2     | 0     | 0.4321 | <0.0001 |
| C9orf152   | 0.596 | 0.4322 | <0.0001 |
| COMMD8     | 0.841 | 0.4322 | <0.0001 |
| ZNF248     | 0.926 | 0.4323 | 0.0001  |
| BMP4       | 0.791 | 0.4323 | <0.0001 |
| GAD1       | 0.836 | 0.4323 | <0.0001 |
| GALNT1     | 0.89  | 0.4323 | <0.0001 |
| TINF2      | 0.775 | 0.4324 | <0.0001 |
| VTI1A      | 0.724 | 0.4326 | <0.0001 |
| HABP4      | 0.892 | 0.4326 | <0.0001 |
| ZNF45      | 0.842 | 0.4328 | <0.0001 |
| AJUBA      | 0.731 | 0.433  | <0.0001 |
| REN        | 0.812 | 0.433  | <0.0001 |
| CNOT4      | 0.881 | 0.4331 | <0.0001 |
| SMIM10L1   | 0     | 0.4333 | <0.0001 |
| LRRC37A3   | 0.86  | 0.4333 | <0.0001 |
| MYBL1      | 0.83  | 0.4334 | <0.0001 |
| BMPR1A     | 0.888 | 0.4335 | <0.0001 |
| CABIN1     | 0.899 | 0.4335 | <0.0001 |
| ZNF519     | 0.849 | 0.4336 | <0.0001 |

|                |       |        |         |
|----------------|-------|--------|---------|
| XRCC3          | 0.898 | 0.4339 | <0.0001 |
| ZNF786         | 0.87  | 0.434  | <0.0001 |
| TXNDC16        | 0.887 | 0.434  | <0.0001 |
| ZFP14          | 0.921 | 0.4343 | 0.0004  |
| MFGE8          | 0.843 | 0.4345 | <0.0001 |
| ABCC6P2        | 0.853 | 0.4349 | 0.013   |
| SELENOS        | 0.421 | 0.4349 | <0.0001 |
| AIMP1          | 0.815 | 0.4349 | <0.0001 |
| RPL23AP67      | 0     | 0.4351 | <0.0001 |
| MRTO4          | 0.799 | 0.4352 | <0.0001 |
| LINC01139      | 0.677 | 0.4353 | 0.0017  |
| ARHGAP18       | 0.89  | 0.4353 | <0.0001 |
| SOX9           | 0.848 | 0.4354 | <0.0001 |
| ANKS6          | 0.884 | 0.4354 | <0.0001 |
| MAP10          | 0.897 | 0.4355 | 0.0128  |
| RNU6-813P      | 0.58  | 0.4355 | 0.0151  |
| USP37          | 0.881 | 0.4355 | <0.0001 |
| LZIC           | 0.866 | 0.4357 | <0.0001 |
| HTR1D          | 0.891 | 0.4358 | <0.0001 |
| POMK           | 0.732 | 0.436  | 0.0007  |
| SNHG1          | 0.741 | 0.436  | 0.001   |
| RPL36A-HNRNPH2 | 0.397 | 0.436  | <0.0001 |
| NGRN           | 0.959 | 0.4362 | 0.0045  |
| AP5B1          | 0.849 | 0.4362 | 0.0049  |
| TRIM7          | 0.769 | 0.4362 | <0.0001 |
| PPM1E          | 0.784 | 0.4363 | <0.0001 |
| GANAB          | 0.868 | 0.4363 | <0.0001 |
| KDM4A          | 0.788 | 0.4365 | <0.0001 |
| AGO1           | 0.852 | 0.4366 | 0.0021  |
| OTUB1          | 0.861 | 0.4367 | <0.0001 |
| UNC119         | 0.915 | 0.4367 | <0.0001 |
| UBE3D          | 0.549 | 0.4368 | <0.0001 |
| CKMT1B         | 0.771 | 0.4368 | <0.0001 |

|           |       |        |         |
|-----------|-------|--------|---------|
| TLK1      | 0.886 | 0.4369 | <0.0001 |
| KBTBD4    | 0.873 | 0.437  | <0.0001 |
| AUP1      | 0.85  | 0.4371 | <0.0001 |
| SOS1-IT1  | 0.538 | 0.4372 | 0.0149  |
| RTF1      | 0.748 | 0.4372 | <0.0001 |
| ST7-AS1   | 0.85  | 0.4373 | 0.0079  |
| ZBTB34    | 0.901 | 0.4373 | <0.0001 |
| PELI3     | 0.764 | 0.4374 | <0.0001 |
| ARHGEF37  | 0.59  | 0.4375 | <0.0001 |
| GPR89A    | 0.733 | 0.4375 | <0.0001 |
| IRX5      | 0.908 | 0.4375 | <0.0001 |
| HNRNPA1P7 | 0     | 0.4376 | <0.0001 |
| B3GLCT    | 0     | 0.4379 | <0.0001 |
| ZNF93     | 0.777 | 0.4379 | <0.0001 |
| PLAGL2    | 0.887 | 0.4379 | <0.0001 |
| PRPF4     | 0.852 | 0.438  | <0.0001 |
| KCTD10    | 0.84  | 0.4383 | <0.0001 |
| PQBP1     | 0.865 | 0.4383 | <0.0001 |
| OAZ1      | 0.721 | 0.4385 | <0.0001 |
| RPS3      | 0.696 | 0.4386 | <0.0001 |
| RNF7      | 0.825 | 0.4386 | <0.0001 |
| NDUFAF5   | 0.661 | 0.4388 | <0.0001 |
| KANSL1    | 0.892 | 0.4389 | 0.0072  |
| MIR4525   | 0     | 0.4389 | <0.0001 |
| XAGE5     | 0.334 | 0.4389 | <0.0001 |
| TFAP4     | 0.864 | 0.439  | <0.0001 |
| WWC3      | 0.799 | 0.4392 | <0.0001 |
| VDAC2     | 0.834 | 0.4393 | <0.0001 |
| C3orf18   | 0.87  | 0.4393 | <0.0001 |
| LINC01019 | 0.453 | 0.4396 | <0.0001 |
| ADGRG2    | 0.478 | 0.4396 | <0.0001 |
| ESYT1     | 0.841 | 0.4396 | <0.0001 |
| PSMD9     | 0.924 | 0.4396 | <0.0001 |



|            |       |        |         |
|------------|-------|--------|---------|
| PRDM10     | 0.933 | 0.4399 | 0.0002  |
| NDUFV2-AS1 | 0.817 | 0.44   | 0.0205  |
| PQLC2L     | 0     | 0.44   | 0.0337  |
| KRI1       | 0.847 | 0.4402 | <0.0001 |
| SCPEP1     | 0.682 | 0.4403 | <0.0001 |
| MIS18BP1   | 0.835 | 0.4404 | 0.0001  |
| CAMKMT     | 0.777 | 0.4405 | <0.0001 |
| PGAP1      | 0.8   | 0.4406 | <0.0001 |
| MDH2       | 0.835 | 0.4406 | <0.0001 |
| TSPAN5     | 0.606 | 0.4407 | <0.0001 |
| ZNF607     | 0.88  | 0.4407 | <0.0001 |
| KL         | 0.876 | 0.4408 | <0.0001 |
| SCAF1      | 0.812 | 0.4409 | <0.0001 |
| THOC1      | 0.873 | 0.4409 | <0.0001 |
| BRPF1      | 0.876 | 0.441  | <0.0001 |
| CCNO       | 0.754 | 0.4411 | <0.0001 |
| FKBP14     | 0.868 | 0.4411 | <0.0001 |
| MCM3AP-AS1 | 0.936 | 0.4412 | 0.0293  |
| ACP1       | 0.882 | 0.4412 | <0.0001 |
| DFFA       | 0.89  | 0.4412 | <0.0001 |
| CCNG2      | 0.864 | 0.4413 | <0.0001 |
| PCID2      | 0.905 | 0.4413 | <0.0001 |
| RRP1       | 0.817 | 0.4415 | <0.0001 |
| HSPA8      | 0.899 | 0.4415 | <0.0001 |
| ZNF704     | 0.626 | 0.4416 | <0.0001 |
| SCG2       | 0.753 | 0.4416 | <0.0001 |
| CCDC102B   | 0.843 | 0.4416 | <0.0001 |
| BRSK1      | 0.939 | 0.4417 | 0.0004  |
| UTP4       | 0.2   | 0.4417 | <0.0001 |
| COL2A1     | 0.771 | 0.4417 | <0.0001 |
| HMGCR      | 0.866 | 0.4417 | <0.0001 |
| APOLD1     | 0.896 | 0.4418 | <0.0001 |
| ZSCAN26    | 0.915 | 0.4419 | 0.0132  |

|          |       |        |         |
|----------|-------|--------|---------|
| CHCHD2P8 | 0.463 | 0.4419 | <0.0001 |
| SDCBP    | 0.897 | 0.4419 | <0.0001 |
| RPA3     | 0.877 | 0.442  | <0.0001 |
| SOSTDC1  | 0.712 | 0.4421 | <0.0001 |
| MIR5195  | 0.187 | 0.4422 | <0.0001 |
| PRAME    | 0.823 | 0.4423 | <0.0001 |
| SLC18B1  | 0.834 | 0.4424 | 0.0013  |
| KAT2A    | 0.9   | 0.4424 | <0.0001 |
| RAB15    | 0.882 | 0.4425 | <0.0001 |
| EMG1     | 0.913 | 0.4426 | <0.0001 |
| UBE2V2   | 0.84  | 0.4429 | <0.0001 |
| CLNS1A   | 0.847 | 0.4429 | <0.0001 |
| PIH1D1   | 0.832 | 0.443  | <0.0001 |
| PTHLH    | 0.821 | 0.4431 | <0.0001 |
| DSP      | 0.849 | 0.4431 | <0.0001 |
| COL7A1   | 0.843 | 0.4432 | <0.0001 |
| RBM18    | 0.872 | 0.4434 | <0.0001 |
| MIR548D2 | 0     | 0.4435 | 0.0045  |
| HMMR-AS1 | 0.652 | 0.4437 | 0.0002  |
| HSPD1P5  | 0     | 0.4437 | <0.0001 |
| SALRNA1  | 0     | 0.4437 | <0.0001 |
| RRP7A    | 0.703 | 0.4437 | <0.0001 |
| MED30    | 0.631 | 0.4438 | <0.0001 |
| ACAN     | 0.904 | 0.4439 | <0.0001 |
| HSP90B1  | 0.902 | 0.4441 | <0.0001 |
| SEC22C   | 0.804 | 0.4442 | <0.0001 |
| KIAA1328 | 0.861 | 0.4442 | <0.0001 |
| SLC35G2  | 0.516 | 0.4443 | <0.0001 |
| KDM1B    | 0.883 | 0.4443 | <0.0001 |
| WASHC2C  | 0     | 0.4444 | <0.0001 |
| NUDCD2   | 0.776 | 0.4445 | <0.0001 |
| IRF3     | 0.873 | 0.4445 | <0.0001 |
| IMMT     | 0.907 | 0.4445 | <0.0001 |

|           |       |        |         |
|-----------|-------|--------|---------|
| ZNF628    | 0.8   | 0.4446 | <0.0001 |
| PRLR      | 0.907 | 0.4447 | <0.0001 |
| LINC00383 | 0.144 | 0.4449 | <0.0001 |
| CCDC14    | 0.927 | 0.445  | <0.0001 |
| C9orf147  | 0.613 | 0.4451 | 0.0097  |
| ZNF468    | 0.838 | 0.4452 | <0.0001 |
| IFI35     | 0.844 | 0.4452 | <0.0001 |
| MKS1      | 0.799 | 0.4457 | <0.0001 |
| SP1       | 0.904 | 0.4457 | <0.0001 |
| ZC3H10    | 0.909 | 0.4457 | <0.0001 |
| HNRNPA1   | 0.929 | 0.4458 | <0.0001 |
| GJA5      | 0.942 | 0.4459 | 0.0002  |
| GAGE7     | 0.634 | 0.4459 | <0.0001 |
| PI3       | 0.723 | 0.446  | <0.0001 |
| RPS20P27  | 0.673 | 0.4462 | 0.0173  |
| ZNF727    | 0.489 | 0.4462 | <0.0001 |
| CXorf40B  | 0.881 | 0.4463 | <0.0001 |
| SF3A1     | 0.851 | 0.4464 | <0.0001 |
| ACSL3     | 0.889 | 0.4464 | <0.0001 |
| KRT8P22   | 0     | 0.4465 | <0.0001 |
| RBM4B     | 0.898 | 0.4465 | <0.0001 |
| ORC5      | 0.723 | 0.4467 | <0.0001 |
| AGBL3     | 0.948 | 0.4468 | 0.0008  |
| GNL3LP1   | 0.6   | 0.4469 | 0.0423  |
| AFAP1L1   | 0.854 | 0.4469 | <0.0001 |
| DUS1L     | 0.857 | 0.447  | <0.0001 |
| BPTF      | 0.904 | 0.447  | <0.0001 |
| GGA2      | 0.774 | 0.4473 | <0.0001 |
| ARL17A    | 0.878 | 0.4474 | 0.0015  |
| MMP10     | 0.755 | 0.4474 | <0.0001 |
| LRIF1     | 0.86  | 0.4475 | 0.0003  |
| GLI4      | 0.899 | 0.4476 | <0.0001 |
| RNF214    | 0.925 | 0.4477 | 0.0003  |

|           |       |        |         |
|-----------|-------|--------|---------|
| C8orf44   | 0.805 | 0.4481 | <0.0001 |
| FTL       | 0.837 | 0.4484 | <0.0001 |
| EIF3G     | 0.866 | 0.4484 | <0.0001 |
| GTF2A2    | 0.921 | 0.4484 | <0.0001 |
| NT5M      | 0.859 | 0.4485 | <0.0001 |
| THADA     | 0.826 | 0.4487 | <0.0001 |
| GAGE6     | 0.803 | 0.4488 | 0.0021  |
| TMEM167A  | 0.86  | 0.4488 | <0.0001 |
| AMIGO3    | 0.876 | 0.449  | <0.0001 |
| DQX1      | 0.667 | 0.4491 | <0.0001 |
| PXK       | 0.879 | 0.4491 | <0.0001 |
| MBD1      | 0.941 | 0.4492 | <0.0001 |
| LINC00702 | 0.832 | 0.4493 | 0.0064  |
| VSIG1     | 0.558 | 0.4495 | <0.0001 |
| MYH9      | 0.865 | 0.4495 | <0.0001 |
| HSPD1     | 0.885 | 0.4497 | <0.0001 |
| RPL5P24   | 0.231 | 0.4498 | <0.0001 |
| GAPDHP60  | 0.462 | 0.4499 | <0.0001 |
| KLB       | 0.807 | 0.4499 | <0.0001 |
| ARFGAP1   | 0.852 | 0.4501 | <0.0001 |
| RASSF3    | 0.871 | 0.4501 | <0.0001 |
| ARNT      | 0.921 | 0.4501 | <0.0001 |
| TMC5      | 0.497 | 0.4502 | <0.0001 |
| SMURF2    | 0.829 | 0.4502 | <0.0001 |
| ODC1      | 0.904 | 0.4504 | <0.0001 |
| RPL17     | 0.972 | 0.4506 | 0.0355  |
| FKTN      | 0.907 | 0.4506 | <0.0001 |
| KLHL42    | 0.867 | 0.4507 | 0.0035  |
| LOC441455 | 0.733 | 0.4507 | 0.0045  |
| MKRN4P    | 0.237 | 0.4507 | <0.0001 |
| INO80C    | 0.81  | 0.4507 | <0.0001 |
| SPCS2     | 0.919 | 0.4508 | 0.0001  |
| RPS19BP1  | 0.825 | 0.4509 | <0.0001 |

|           |       |        |         |
|-----------|-------|--------|---------|
| C3orf62   | 0.877 | 0.4509 | <0.0001 |
| DDX56     | 0.877 | 0.451  | <0.0001 |
| TRIM56    | 0.879 | 0.4512 | <0.0001 |
| SRSF12    | 0.705 | 0.4513 | <0.0001 |
| TAOK2     | 0.881 | 0.4518 | <0.0001 |
| HIP1      | 0.85  | 0.4519 | <0.0001 |
| LGALSL    | 0.817 | 0.4521 | <0.0001 |
| OR2B6     | 0.859 | 0.4523 | <0.0001 |
| RANGAP1   | 0.879 | 0.4523 | <0.0001 |
| NXT1      | 0.924 | 0.4523 | <0.0001 |
| DPH3      | 0.9   | 0.4524 | <0.0001 |
| MMGT1     | 0.901 | 0.4525 | 0.0003  |
| RPL19P12  | 0.435 | 0.4525 | <0.0001 |
| KIAA1958  | 0.885 | 0.4526 | <0.0001 |
| MTMR14    | 0.921 | 0.4526 | <0.0001 |
| FAM171B   | 0.878 | 0.4528 | <0.0001 |
| CDC42SE1  | 0.904 | 0.4528 | <0.0001 |
| PTGDR2    | 0.695 | 0.453  | <0.0001 |
| CPSF2     | 0.885 | 0.453  | <0.0001 |
| PRRX1     | 0.87  | 0.4531 | <0.0001 |
| RPL23AP12 | 0     | 0.4532 | <0.0001 |
| WARS2     | 0.839 | 0.4533 | <0.0001 |
| GPBP1     | 0.857 | 0.4534 | <0.0001 |
| USP31     | 0.879 | 0.4534 | <0.0001 |
| LINC01448 | 0     | 0.4535 | <0.0001 |
| SLC38A7   | 0.795 | 0.4535 | <0.0001 |
| ZBED6     | 0.865 | 0.4536 | 0.0106  |
| ZNF98     | 0.622 | 0.4537 | <0.0001 |
| ASH1L     | 0.943 | 0.454  | 0.0002  |
| PHIP      | 0.863 | 0.4542 | <0.0001 |
| CNTNAP1   | 0.859 | 0.4543 | <0.0001 |
| TMED4     | 0.869 | 0.4543 | <0.0001 |
| CEP170    | 0.912 | 0.4543 | <0.0001 |

|           |       |        |         |
|-----------|-------|--------|---------|
| EDARADD   | 0.843 | 0.4544 | <0.0001 |
| CPLX2     | 0.905 | 0.4545 | <0.0001 |
| VPS39     | 0.927 | 0.4545 | <0.0001 |
| SUSD4     | 0.716 | 0.4546 | <0.0001 |
| ORC3      | 0.848 | 0.4547 | <0.0001 |
| MAP3K11   | 0.863 | 0.4547 | <0.0001 |
| COX5A     | 0.888 | 0.4547 | <0.0001 |
| OR2A1-AS1 | 0.369 | 0.455  | <0.0001 |
| RABGGTB   | 0.918 | 0.455  | <0.0001 |
| GMDS      | 0.81  | 0.4552 | <0.0001 |
| UBXN2A    | 0.895 | 0.4553 | 0.0002  |
| RPS2P55   | 0     | 0.4553 | <0.0001 |
| LRRC69    | 0.778 | 0.4554 | <0.0001 |
| TBC1D14   | 0.889 | 0.4554 | <0.0001 |
| MYO18B    | 0.652 | 0.4556 | <0.0001 |
| CACUL1    | 0.633 | 0.4557 | <0.0001 |
| DRAM1     | 0.859 | 0.4557 | <0.0001 |
| RMST      | 0.69  | 0.4558 | <0.0001 |
| RPL13AP6  | 0.659 | 0.4559 | 0.0037  |
| ZBTB8OSP2 | 0     | 0.456  | <0.0001 |
| GAL3ST1   | 0.788 | 0.456  | <0.0001 |
| PDZK1     | 0.888 | 0.456  | <0.0001 |
| RCE1      | 0.915 | 0.4562 | <0.0001 |
| DDX54     | 0.903 | 0.4563 | <0.0001 |
| POLR1C    | 0.906 | 0.4563 | <0.0001 |
| STRADA    | 0.963 | 0.4564 | 0.02    |
| RPE       | 0.904 | 0.4565 | <0.0001 |
| TUBA4B    | 0.665 | 0.4566 | <0.0001 |
| SFI1      | 0.832 | 0.4566 | <0.0001 |
| MAGEB2    | 0.829 | 0.4567 | <0.0001 |
| TESK1     | 0.854 | 0.4575 | <0.0001 |
| ANP32B    | 0.87  | 0.4575 | <0.0001 |
| KCNU1     | 0.531 | 0.4577 | <0.0001 |

|            |       |        |         |
|------------|-------|--------|---------|
| C5orf46    | 0.847 | 0.4577 | <0.0001 |
| ZBTB40     | 0.905 | 0.4577 | <0.0001 |
| FAM3C2     | 0.121 | 0.4578 | <0.0001 |
| NOP2       | 0.846 | 0.4578 | <0.0001 |
| JPH1       | 0.721 | 0.4579 | <0.0001 |
| LINC01011  | 0.736 | 0.458  | 0.0495  |
| PHF21A     | 0.825 | 0.458  | <0.0001 |
| WDR77      | 0.761 | 0.4582 | <0.0001 |
| SLC45A4    | 0.851 | 0.4582 | <0.0001 |
| RNA5SP108  | 0.575 | 0.4583 | 0.0134  |
| TRIM6      | 0.819 | 0.4583 | <0.0001 |
| ULK4       | 0.844 | 0.4583 | <0.0001 |
| MRPL11     | 0.857 | 0.4583 | <0.0001 |
| DYNC2LI1   | 0.863 | 0.4583 | <0.0001 |
| ARL6IP6    | 0.83  | 0.4586 | <0.0001 |
| SNRNP27    | 0.882 | 0.4587 | <0.0001 |
| DBP        | 0.858 | 0.4589 | <0.0001 |
| E4F1       | 0.798 | 0.459  | <0.0001 |
| TTLL12     | 0.854 | 0.459  | <0.0001 |
| OR8G3P     | 0.289 | 0.4591 | <0.0001 |
| PRELID2    | 0.818 | 0.4592 | <0.0001 |
| CCDC47     | 0.874 | 0.4592 | <0.0001 |
| DDX39BP2   | 0     | 0.4595 | <0.0001 |
| PRKCD      | 0.869 | 0.4598 | <0.0001 |
| RNU6-1160P | 0.592 | 0.46   | 0.0092  |
| EEF1D      | 0.9   | 0.46   | <0.0001 |
| BAGE3      | 0.787 | 0.4601 | 0.0009  |
| LINC00268  | 0     | 0.4601 | <0.0001 |
| METTL2B    | 0.866 | 0.4603 | <0.0001 |
| FRS3       | 0.89  | 0.4605 | <0.0001 |
| FSTL5      | 0.538 | 0.4606 | <0.0001 |
| TOMM5      | 0.918 | 0.4607 | 0.001   |
| FLNB       | 0.859 | 0.4607 | <0.0001 |

|            |       |        |         |
|------------|-------|--------|---------|
| ELK4       | 0.863 | 0.4607 | <0.0001 |
| FBXW9      | 0.864 | 0.4607 | <0.0001 |
| PLXNA3     | 0.815 | 0.4608 | <0.0001 |
| URI1       | 0.828 | 0.4609 | <0.0001 |
| SLC2A1     | 0.707 | 0.461  | <0.0001 |
| IGHV3-79   | 0     | 0.4615 | <0.0001 |
| TFE3       | 0.908 | 0.4615 | <0.0001 |
| FBXL19-AS1 | 0.884 | 0.4616 | 0.0068  |
| ZNF253     | 0.728 | 0.4616 | <0.0001 |
| TCP1       | 0.919 | 0.4619 | 0.0005  |
| ARHGEF2    | 0.833 | 0.4619 | <0.0001 |
| ZW10       | 0.818 | 0.462  | <0.0001 |
| SGCE       | 0.88  | 0.462  | <0.0001 |
| RPL23P8    | 0.792 | 0.4623 | 0.0189  |
| ZNF714     | 0.728 | 0.4623 | <0.0001 |
| PRDX5      | 0.915 | 0.4623 | <0.0001 |
| TMEM198    | 0.779 | 0.4625 | <0.0001 |
| ZNF552     | 0.844 | 0.4625 | <0.0001 |
| TIGD3      | 0.897 | 0.4625 | <0.0001 |
| CPLX1      | 0.848 | 0.4628 | <0.0001 |
| ST6GALNAC2 | 0.853 | 0.4628 | <0.0001 |
| ST3GAL2    | 0.872 | 0.4629 | <0.0001 |
| DCAF12     | 0.825 | 0.4631 | <0.0001 |
| MAP7D1     | 0.848 | 0.4631 | <0.0001 |
| WDR61      | 0.885 | 0.4631 | <0.0001 |
| HSPA13     | 0.834 | 0.4632 | <0.0001 |
| CASC11     | 0.117 | 0.4633 | <0.0001 |
| CPXM1      | 0.898 | 0.4633 | <0.0001 |
| EXTL3      | 0.842 | 0.4635 | <0.0001 |
| KIF21A     | 0.86  | 0.4635 | <0.0001 |
| DNAJC8     | 0.894 | 0.4635 | <0.0001 |
| MZF1-AS1   | 0     | 0.4636 | <0.0001 |
| FBXL6      | 0.799 | 0.4636 | <0.0001 |



|                |       |        |         |
|----------------|-------|--------|---------|
| DIO2           | 0.877 | 0.4636 | <0.0001 |
| GRPR           | 0.885 | 0.4636 | <0.0001 |
| CEP112         | 0.734 | 0.4638 | <0.0001 |
| BICD1          | 0.873 | 0.4638 | <0.0001 |
| ZNF691         | 0.915 | 0.4644 | <0.0001 |
| IRAK2          | 0.696 | 0.4645 | <0.0001 |
| PTGES3L-AARSD1 | 0.673 | 0.4648 | 0.0072  |
| MIR6719        | 0     | 0.4648 | <0.0001 |
| RPS4X          | 0.911 | 0.4649 | <0.0001 |
| ZSWIM1         | 0.866 | 0.465  | <0.0001 |
| UBE2N          | 0.902 | 0.465  | <0.0001 |
| SNAP25-AS1     | 0.505 | 0.4652 | 0.0053  |
| SEZ6L2         | 0.871 | 0.4653 | <0.0001 |
| DIDO1          | 0.924 | 0.4654 | <0.0001 |
| ZNF101         | 0.81  | 0.4655 | <0.0001 |
| EXOC3-AS1      | 0     | 0.4656 | <0.0001 |
| ZIM2-AS1       | 0.462 | 0.4656 | <0.0001 |
| RPA1           | 0.888 | 0.4656 | <0.0001 |
| TSR3           | 0.862 | 0.4657 | 0.0007  |
| LRP4           | 0.687 | 0.4657 | <0.0001 |
| IER3IP1        | 0.867 | 0.4657 | <0.0001 |
| IFT172         | 0.833 | 0.4658 | <0.0001 |
| PPP2CA         | 0.88  | 0.4658 | <0.0001 |
| SCAMP5         | 0.835 | 0.4659 | <0.0001 |
| GLUL           | 0.875 | 0.4659 | <0.0001 |
| KIZ            | 0.733 | 0.4661 | <0.0001 |
| PABPC3         | 0.894 | 0.4661 | <0.0001 |
| MAVS           | 0.908 | 0.4663 | 0.0003  |
| ARF3           | 0.814 | 0.4664 | <0.0001 |
| BRAP           | 0.861 | 0.4664 | <0.0001 |
| RNU6-759P      | 0     | 0.4666 | <0.0001 |
| CDK12          | 0.832 | 0.4666 | <0.0001 |
| SLC25A6P2      | 0.576 | 0.4667 | 0.0079  |

|           |       |        |         |
|-----------|-------|--------|---------|
| DPY19L2P3 | 0.879 | 0.4668 | 0.0011  |
| PPP6R1    | 0.706 | 0.4669 | <0.0001 |
| SNHG3     | 0.87  | 0.467  | 0.0116  |
| KITLG     | 0.881 | 0.467  | <0.0001 |
| QRICH2    | 0.757 | 0.4673 | <0.0001 |
| PM20D2    | 0.806 | 0.4673 | <0.0001 |
| CELSR2    | 0.842 | 0.4673 | <0.0001 |
| DNLZ      | 0.969 | 0.4674 | 0.017   |
| PARD3     | 0.821 | 0.4674 | <0.0001 |
| ATF6      | 0.854 | 0.4674 | <0.0001 |
| STAG2     | 0.889 | 0.4675 | <0.0001 |
| DAP       | 0.836 | 0.4677 | <0.0001 |
| CCNK      | 0.823 | 0.4679 | <0.0001 |
| ZMIZ2     | 0.912 | 0.4679 | <0.0001 |
| ATP7A     | 0.876 | 0.468  | <0.0001 |
| HOXD10    | 0.913 | 0.468  | <0.0001 |
| SLC25A35  | 0.856 | 0.4681 | <0.0001 |
| IQCB1     | 0.915 | 0.4681 | <0.0001 |
| ZNF738    | 0.764 | 0.4683 | <0.0001 |
| CDC42EP4  | 0.872 | 0.4683 | <0.0001 |
| HMGN2P11  | 0.511 | 0.4685 | 0.0003  |
| LINC00607 | 0     | 0.4685 | <0.0001 |
| BECN2     | 0     | 0.4687 | <0.0001 |
| AK6       | 0.878 | 0.4688 | 0.004   |
| PTPN12    | 0.893 | 0.4688 | <0.0001 |
| ACTG1     | 0.888 | 0.4689 | <0.0001 |
| L3MBTL2   | 0.824 | 0.4691 | <0.0001 |
| ME2       | 0.911 | 0.4693 | <0.0001 |
| APPL2     | 0.851 | 0.4695 | <0.0001 |
| PPP1R7    | 0.828 | 0.4696 | <0.0001 |
| MLIP-AS1  | 0     | 0.4697 | <0.0001 |
| HMGCS1    | 0.713 | 0.47   | <0.0001 |
| NBN       | 0.881 | 0.4702 | <0.0001 |

|                |       |        |         |
|----------------|-------|--------|---------|
| CALM2          | 0.933 | 0.4704 | 0.0005  |
| MFN1           | 0.925 | 0.4705 | <0.0001 |
| GLO1           | 0.865 | 0.4707 | <0.0001 |
| IPO13          | 0.885 | 0.4709 | <0.0001 |
| HERC2          | 0.895 | 0.4709 | <0.0001 |
| HSPB2-C11orf52 | 0.33  | 0.4711 | 0.0169  |
| TMEM246-AS1    | 0     | 0.4711 | <0.0001 |
| RCAN3          | 0.771 | 0.4711 | <0.0001 |
| ABI1           | 0.896 | 0.4711 | <0.0001 |
| TMEM182        | 0.861 | 0.4712 | <0.0001 |
| TAP1           | 0.866 | 0.4713 | <0.0001 |
| HOXD3          | 0.905 | 0.4716 | <0.0001 |
| EID2B          | 0.919 | 0.4716 | <0.0001 |
| AGTRAP         | 0.809 | 0.4718 | <0.0001 |
| NUP188         | 0.829 | 0.4718 | <0.0001 |
| BCAP29         | 0.888 | 0.4718 | <0.0001 |
| SSX2IP         | 0.772 | 0.4721 | <0.0001 |
| CAPN1          | 0.844 | 0.4721 | <0.0001 |
| RAB11FIP2      | 0.881 | 0.4722 | <0.0001 |
| TAB3-AS2       | 0     | 0.4723 | 0.0014  |
| GRINA          | 0.777 | 0.4724 | <0.0001 |
| MBLAC1         | 0.859 | 0.4727 | <0.0001 |
| RNU6-725P      | 0.545 | 0.4728 | 0.004   |
| PDIA3          | 0.866 | 0.4728 | <0.0001 |
| RPP30          | 0.909 | 0.4729 | <0.0001 |
| IPP            | 0.915 | 0.4729 | <0.0001 |
| ZNF286B        | 0.738 | 0.473  | 0.0035  |
| ZGRF1          | 0.911 | 0.473  | 0.023   |
| DSCR4-IT1      | 0     | 0.473  | <0.0001 |
| F13A1          | 0.749 | 0.473  | <0.0001 |
| MYO9B          | 0.869 | 0.4733 | <0.0001 |
| TBC1D22A       | 0.9   | 0.4733 | <0.0001 |
| NR6A1          | 0.91  | 0.4733 | <0.0001 |

|           |       |        |         |
|-----------|-------|--------|---------|
| AP1M1     | 0.761 | 0.4737 | <0.0001 |
| WDR91     | 0.851 | 0.4737 | <0.0001 |
| MET       | 0.874 | 0.4738 | <0.0001 |
| DUSP5P1   | 0.816 | 0.4739 | 0.0009  |
| MIR3939   | 0     | 0.4739 | <0.0001 |
| CARM1     | 0.813 | 0.4744 | <0.0001 |
| CENPBD1   | 0.835 | 0.4744 | <0.0001 |
| MRPL42    | 0.896 | 0.4744 | <0.0001 |
| SNRNP40   | 0.846 | 0.4746 | <0.0001 |
| PRKCSH    | 0.921 | 0.4746 | <0.0001 |
| CST1      | 0.76  | 0.4748 | <0.0001 |
| USP27X    | 0.784 | 0.4748 | <0.0001 |
| GNL3L     | 0.805 | 0.4751 | <0.0001 |
| IFI30     | 0.969 | 0.4752 | 0.0069  |
| LOC643454 | 0.715 | 0.4752 | 0.0091  |
| DDA1      | 0.756 | 0.4753 | <0.0001 |
| STYXL1    | 0.791 | 0.4753 | <0.0001 |
| IER5      | 0.855 | 0.4756 | <0.0001 |
| SDHC      | 0.858 | 0.4756 | <0.0001 |
| CTSD      | 0.85  | 0.4757 | <0.0001 |
| C2CD3     | 0.869 | 0.4758 | <0.0001 |
| MALSU1    | 0.869 | 0.4759 | 0.0019  |
| ATP6V1D   | 0.875 | 0.4759 | <0.0001 |
| SMURF1    | 0.888 | 0.4759 | <0.0001 |
| FTLP8     | 0.441 | 0.476  | <0.0001 |
| PI15      | 0.883 | 0.4761 | <0.0001 |
| SLC22A11  | 0.681 | 0.4762 | <0.0001 |
| C1QL1     | 0.824 | 0.4762 | <0.0001 |
| RAD50     | 0.84  | 0.4764 | <0.0001 |
| APAF1     | 0.869 | 0.4764 | <0.0001 |
| TYSND1    | 0.873 | 0.4764 | <0.0001 |
| PECAM1    | 0.92  | 0.4765 | <0.0001 |
| TTF1      | 0.874 | 0.4767 | <0.0001 |

|           |       |        |         |
|-----------|-------|--------|---------|
| ERVK3-1   | 0.748 | 0.4768 | 0.029   |
| RPL22L1   | 0.72  | 0.4768 | <0.0001 |
| LINC01504 | 0     | 0.4771 | <0.0001 |
| FAM161A   | 0.755 | 0.4771 | <0.0001 |
| FRMD3     | 0.811 | 0.4771 | <0.0001 |
| NCLN      | 0.74  | 0.4772 | <0.0001 |
| CTNNA2    | 0.763 | 0.4772 | <0.0001 |
| NFXL1     | 0.834 | 0.4772 | <0.0001 |
| CCDC22    | 0.895 | 0.4772 | <0.0001 |
| CLIC5     | 0.813 | 0.4773 | <0.0001 |
| HOXD4     | 0.845 | 0.4773 | <0.0001 |
| HIST1H2BI | 0.9   | 0.4775 | 0.0002  |
| ZNF883    | 0.707 | 0.4777 | <0.0001 |
| LYPLAL1   | 0.858 | 0.4777 | <0.0001 |
| RAB5B     | 0.907 | 0.4777 | <0.0001 |
| FAM120AOS | 0.862 | 0.4778 | <0.0001 |
| TPM1      | 0.906 | 0.4778 | <0.0001 |
| LINC01271 | 0.059 | 0.4779 | <0.0001 |
| ZNF736    | 0.834 | 0.4779 | <0.0001 |
| DARS      | 0.879 | 0.478  | <0.0001 |
| ZNF107    | 0.881 | 0.478  | <0.0001 |
| SEC24C    | 0.905 | 0.478  | <0.0001 |
| PPT1      | 0.933 | 0.4783 | <0.0001 |
| ZCCHC4    | 0.823 | 0.4785 | <0.0001 |
| NOP58     | 0.789 | 0.4786 | <0.0001 |
| OXA1L     | 0.863 | 0.4787 | <0.0001 |
| FABP5P3   | 0.502 | 0.4788 | 0.0027  |
| RNF31     | 0.962 | 0.4788 | 0.0033  |
| RC3H2     | 0.822 | 0.4788 | <0.0001 |
| ZNF764    | 0.834 | 0.4789 | <0.0001 |
| PLBD2     | 0.801 | 0.4794 | <0.0001 |
| FUT2      | 0.855 | 0.4794 | <0.0001 |
| AUNIP     | 0.866 | 0.4795 | 0.0007  |

|              |       |        |         |
|--------------|-------|--------|---------|
| SLC35B3      | 0.838 | 0.4796 | <0.0001 |
| TNRC18       | 0.904 | 0.4796 | <0.0001 |
| LINC01480    | 0     | 0.4797 | <0.0001 |
| MRRFP1       | 0.176 | 0.4797 | <0.0001 |
| ALG13-AS1    | 0.417 | 0.4797 | <0.0001 |
| NDUFA7       | 0.962 | 0.4798 | 0.0031  |
| RPL29        | 0.875 | 0.4798 | <0.0001 |
| NUP214       | 0.862 | 0.48   | <0.0001 |
| AQP8         | 0.83  | 0.4801 | <0.0001 |
| MRPL45       | 0.845 | 0.4801 | <0.0001 |
| CTPS2        | 0.887 | 0.4801 | <0.0001 |
| SRSF9        | 0.803 | 0.4802 | 0.0001  |
| MIR4295      | 0     | 0.4802 | 0.0043  |
| ZBTB26       | 0.909 | 0.4802 | <0.0001 |
| LOC100132356 | 0.839 | 0.4803 | 0.005   |
| LOC153684    | 0.84  | 0.4804 | 0.0002  |
| RN7SL396P    | 0.132 | 0.4804 | <0.0001 |
| HAUS4        | 0.756 | 0.4804 | <0.0001 |
| IVNS1ABP     | 0.906 | 0.4804 | <0.0001 |
| ZNF131       | 0.812 | 0.4805 | <0.0001 |
| METTL21A     | 0.905 | 0.4807 | 0.0027  |
| NDUFS2       | 0.608 | 0.4807 | <0.0001 |
| HSPA1B       | 0.908 | 0.4807 | <0.0001 |
| U2AF2        | 0.883 | 0.4808 | <0.0001 |
| UBR7         | 0.857 | 0.4809 | <0.0001 |
| ZNF335       | 0.886 | 0.4816 | <0.0001 |
| NAV3         | 0.733 | 0.4818 | <0.0001 |
| FDCSP        | 0     | 0.4819 | <0.0001 |
| ARHGAP39     | 0.763 | 0.4819 | <0.0001 |
| VEZF1        | 0.885 | 0.4819 | <0.0001 |
| SUPT3H       | 0.858 | 0.482  | <0.0001 |
| ADAMTS7P1    | 0     | 0.4824 | <0.0001 |
| HIST1H2AC    | 0.862 | 0.4825 | <0.0001 |

|           |       |        |         |
|-----------|-------|--------|---------|
| TRIM68    | 0.873 | 0.4826 | <0.0001 |
| KRT10     | 0.874 | 0.4826 | <0.0001 |
| ANKLE2    | 0.821 | 0.4827 | <0.0001 |
| MAGEA6    | 0.859 | 0.4827 | <0.0001 |
| TDGF1     | 0.829 | 0.4828 | <0.0001 |
| HDDC3     | 0.87  | 0.4829 | <0.0001 |
| EBF3      | 0.807 | 0.4833 | <0.0001 |
| ISCA2     | 0.856 | 0.4834 | <0.0001 |
| CDK2      | 0.837 | 0.4835 | <0.0001 |
| IGSF1     | 0.842 | 0.4835 | <0.0001 |
| RPS11     | 0.928 | 0.4836 | <0.0001 |
| IL17D     | 0.818 | 0.4837 | <0.0001 |
| SCFD2     | 0.857 | 0.4838 | <0.0001 |
| MAGEC1    | 0.871 | 0.4838 | <0.0001 |
| SLC38A9   | 0.908 | 0.4838 | <0.0001 |
| SNORA70   | 0.695 | 0.4839 | 0.0001  |
| SLC6A9    | 0.887 | 0.4841 | <0.0001 |
| SIX5      | 0.898 | 0.4841 | <0.0001 |
| TANGO2    | 0.886 | 0.4842 | 0.0042  |
| LINC00467 | 0.655 | 0.4843 | <0.0001 |
| TWISTNB   | 0.799 | 0.4843 | <0.0001 |
| BRK1      | 0.899 | 0.4844 | 0.0045  |
| PRR7      | 0.849 | 0.4844 | <0.0001 |
| NDUFB3    | 0.905 | 0.4846 | <0.0001 |
| NHLRC1    | 0.829 | 0.4847 | <0.0001 |
| RPAP3     | 0.882 | 0.4847 | <0.0001 |
| C19orf25  | 0.808 | 0.4848 | <0.0001 |
| CHMP4C    | 0.679 | 0.4849 | <0.0001 |
| OSBP2     | 0.893 | 0.4849 | <0.0001 |
| MSI1      | 0.914 | 0.4849 | <0.0001 |
| RNU7-58P  | 0.438 | 0.485  | 0.0021  |
| RPL28     | 0.744 | 0.4852 | <0.0001 |
| BBS4      | 0.89  | 0.4852 | <0.0001 |

|              |       |        |         |
|--------------|-------|--------|---------|
| PARL         | 0.892 | 0.4853 | <0.0001 |
| HIST1H2BL    | 0.91  | 0.4853 | <0.0001 |
| RNU6-945P    | 0.748 | 0.4854 | 0.0383  |
| LOC101927787 | 0     | 0.4855 | <0.0001 |
| MRPL30       | 0.853 | 0.4855 | <0.0001 |
| TAB1         | 0.735 | 0.4856 | <0.0001 |
| ALCAM        | 0.863 | 0.4856 | <0.0001 |
| PLXND1       | 0.877 | 0.4858 | <0.0001 |
| C12orf45     | 0.772 | 0.4859 | <0.0001 |
| PIAS4        | 0.881 | 0.4859 | <0.0001 |
| DDX11        | 0.918 | 0.486  | <0.0001 |
| ATXN2        | 0.938 | 0.486  | <0.0001 |
| UBIAD1       | 0.751 | 0.4861 | <0.0001 |
| ODAM         | 0.605 | 0.4863 | <0.0001 |
| EGLN1        | 0.849 | 0.4863 | <0.0001 |
| APOO         | 0.882 | 0.4863 | <0.0001 |
| CSRP2        | 0.822 | 0.4864 | <0.0001 |
| NAA11        | 0.264 | 0.4865 | <0.0001 |
| MYL12B       | 0.894 | 0.4865 | <0.0001 |
| ASNS         | 0.897 | 0.4866 | <0.0001 |
| DCUN1D5      | 0.911 | 0.4866 | <0.0001 |
| BPIFB2       | 0.352 | 0.4867 | <0.0001 |
| RPL10P1      | 0.267 | 0.4868 | <0.0001 |
| AGGF1        | 0.89  | 0.4868 | <0.0001 |
| BABAM1       | 0.714 | 0.4869 | <0.0001 |
| PIK3R3       | 0.871 | 0.4869 | <0.0001 |
| SNHG4        | 0.869 | 0.487  | 0.0027  |
| ARID4B       | 0.869 | 0.4871 | <0.0001 |
| RPLP0P1      | 0     | 0.4872 | <0.0001 |
| STARD3       | 0.842 | 0.4872 | <0.0001 |
| RGS12        | 0.919 | 0.4875 | <0.0001 |
| SLC35A2      | 0.938 | 0.4875 | <0.0001 |
| NELFA        | 0.663 | 0.4876 | 0.0018  |



|           |       |        |         |
|-----------|-------|--------|---------|
| COA3      | 0.861 | 0.4877 | 0.0005  |
| SKP1      | 0.838 | 0.4879 | <0.0001 |
| NUDT2     | 0.854 | 0.488  | <0.0001 |
| EMC7      | 0.943 | 0.4881 | 0.0177  |
| TCTA      | 0.808 | 0.4881 | <0.0001 |
| MIR5591   | 0     | 0.4883 | <0.0001 |
| TEX261    | 0.87  | 0.4883 | <0.0001 |
| MAEL      | 0.56  | 0.4884 | <0.0001 |
| EXO3      | 0.83  | 0.4885 | <0.0001 |
| TMEM138   | 0.887 | 0.4885 | <0.0001 |
| ANKRD49   | 0.92  | 0.4886 | <0.0001 |
| SLC25A5P1 | 0     | 0.4887 | <0.0001 |
| FAM110A   | 0.889 | 0.4887 | <0.0001 |
| NF1       | 0.894 | 0.4888 | <0.0001 |
| LZTS1     | 0.933 | 0.4889 | <0.0001 |
| CPPED1    | 0.925 | 0.4892 | <0.0001 |
| PLGRKT    | 0.851 | 0.4893 | 0.0005  |
| PARP4P1   | 0     | 0.4893 | <0.0001 |
| NFKBIL1   | 0.911 | 0.4893 | <0.0001 |
| MIR3174   | 0.49  | 0.4895 | <0.0001 |
| RAF1      | 0.916 | 0.4895 | <0.0001 |
| CCT7P2    | 0     | 0.4896 | <0.0001 |
| TEX19     | 0.837 | 0.4897 | <0.0001 |
| CCDC6     | 0.858 | 0.4897 | <0.0001 |
| MIR1972-1 | 0     | 0.4898 | <0.0001 |
| RPUSD2    | 0.887 | 0.4898 | <0.0001 |
| AGPS      | 0.871 | 0.4899 | <0.0001 |
| PTBP2     | 0.887 | 0.4899 | <0.0001 |
| MAP1S     | 0.921 | 0.4899 | <0.0001 |
| HIST1H4A  | 0.864 | 0.49   | <0.0001 |
| EIF2A     | 0.805 | 0.4902 | <0.0001 |
| KIF28P    | 0.222 | 0.4903 | <0.0001 |
| NDUFA6    | 0.859 | 0.4904 | <0.0001 |

|            |       |        |         |
|------------|-------|--------|---------|
| ZBTB12     | 0.911 | 0.4905 | <0.0001 |
| TXNDC12    | 0.869 | 0.4907 | <0.0001 |
| MAGEB17    | 0.8   | 0.4908 | 0.0024  |
| MIR3977    | 0     | 0.4909 | 0.0035  |
| TSEN2      | 0.791 | 0.4909 | <0.0001 |
| LINC00997  | 0.698 | 0.491  | 0.0016  |
| MYDGF      | 0.542 | 0.4911 | 0.0051  |
| ZNF432     | 0.86  | 0.4911 | <0.0001 |
| RNU4ATAC3P | 0.602 | 0.4912 | 0.0395  |
| TMEM165    | 0.868 | 0.4913 | <0.0001 |
| DNAJC7     | 0.872 | 0.4914 | <0.0001 |
| EXOSC7     | 0.899 | 0.4914 | <0.0001 |
| GSDMD      | 0.672 | 0.4915 | <0.0001 |
| NF2        | 0.874 | 0.4915 | <0.0001 |
| HMGB1P11   | 0.493 | 0.4917 | <0.0001 |
| RNU4ATAC5P | 0.26  | 0.4918 | 0.0019  |
| EDEM2      | 0.796 | 0.4918 | <0.0001 |
| COL21A1    | 0.875 | 0.4918 | <0.0001 |
| KCTD20     | 0.809 | 0.4919 | <0.0001 |
| SRGAP2     | 0.853 | 0.4919 | <0.0001 |
| ATXN7L3B   | 0.789 | 0.492  | <0.0001 |
| RAB4A      | 0.858 | 0.492  | <0.0001 |
| RPL35A     | 0.885 | 0.492  | <0.0001 |
| NCKIPSD    | 0.85  | 0.4921 | <0.0001 |
| BCOR       | 0.899 | 0.4921 | <0.0001 |
| B9D1       | 0.785 | 0.4922 | <0.0001 |
| UBTD2      | 0.856 | 0.4923 | <0.0001 |
| DIS3L2     | 0.912 | 0.4924 | <0.0001 |
| RAB2A      | 0.849 | 0.4925 | <0.0001 |
| COX7A2L    | 0.851 | 0.4925 | <0.0001 |
| SNHG17     | 0.885 | 0.4926 | 0.0024  |
| C15orf40   | 0.863 | 0.4927 | <0.0001 |
| LINC01270  | 0.688 | 0.4929 | 0.0001  |

|             |       |        |         |
|-------------|-------|--------|---------|
| PPFIA1      | 0.821 | 0.4929 | <0.0001 |
| NSUN5P2     | 0.798 | 0.4931 | 0.0011  |
| MTMR2       | 0.906 | 0.4933 | <0.0001 |
| CAMK2G      | 0.927 | 0.4933 | <0.0001 |
| LINC01572   | 0.091 | 0.4936 | <0.0001 |
| ST13P13     | 0     | 0.4937 | <0.0001 |
| HIST1H2BPS1 | 0.131 | 0.4938 | 0.0009  |
| AAAS        | 0.878 | 0.4938 | <0.0001 |
| TMEM39A     | 0.907 | 0.4938 | <0.0001 |
| TSPAN33     | 0.677 | 0.4939 | <0.0001 |
| IDH3G       | 0.833 | 0.4939 | <0.0001 |
| P3H1        | 0.633 | 0.4941 | 0.0115  |
| ZNF618      | 0.898 | 0.4941 | <0.0001 |
| ZNF337      | 0.882 | 0.4942 | <0.0001 |
| TBX19       | 0.89  | 0.4942 | <0.0001 |
| WDR83       | 0.926 | 0.4943 | 0.001   |
| VOPP1       | 0.712 | 0.4943 | <0.0001 |
| MTFP1       | 0.954 | 0.4944 | 0.0186  |
| FAM83C-AS1  | 0.915 | 0.4946 | 0.0261  |
| HMGN2P18    | 0.434 | 0.4948 | <0.0001 |
| RPS17       | 0.883 | 0.4948 | <0.0001 |
| DCLRE1C     | 0.916 | 0.4948 | <0.0001 |
| RPL6        | 0.85  | 0.4949 | <0.0001 |
| IFT80       | 0.924 | 0.495  | <0.0001 |
| HIST1H3G    | 0.842 | 0.4951 | <0.0001 |
| NOMO2       | 0.877 | 0.4951 | <0.0001 |
| RNF2        | 0.889 | 0.4951 | <0.0001 |
| BCL6B       | 0.881 | 0.4952 | <0.0001 |
| ZNF189      | 0.882 | 0.4953 | <0.0001 |
| EXOSC2      | 0.894 | 0.4953 | <0.0001 |
| PALLD       | 0.796 | 0.4954 | <0.0001 |
| ABCB10      | 0.844 | 0.4954 | <0.0001 |
| GLRX2       | 0.874 | 0.4954 | <0.0001 |

|           |       |        |         |
|-----------|-------|--------|---------|
| HSPBP1    | 0.883 | 0.4954 | <0.0001 |
| KRT8P23   | 0.113 | 0.4955 | <0.0001 |
| SP6       | 0.864 | 0.4955 | <0.0001 |
| NGDN      | 0.875 | 0.4956 | <0.0001 |
| MIR4312   | 0.361 | 0.4958 | <0.0001 |
| RNF25     | 0.761 | 0.4958 | <0.0001 |
| OSTM1     | 0.828 | 0.4959 | <0.0001 |
| NSMAF     | 0.835 | 0.4959 | <0.0001 |
| ALG12     | 0.867 | 0.4959 | <0.0001 |
| ADAMDEC1  | 0.845 | 0.496  | <0.0001 |
| NOMO3     | 0.887 | 0.4961 | <0.0001 |
| RPS19     | 0.827 | 0.4962 | <0.0001 |
| HIST1H3J  | 0.886 | 0.4962 | <0.0001 |
| DRAM2     | 0.903 | 0.4963 | 0.0002  |
| TTYH3     | 0.709 | 0.4963 | <0.0001 |
| HNRNPC    | 0.832 | 0.4963 | <0.0001 |
| SUMO2P3   | 0.577 | 0.4964 | 0.004   |
| POLR2L    | 0.845 | 0.4964 | <0.0001 |
| LINC00910 | 0.57  | 0.4966 | <0.0001 |
| CAPN2     | 0.878 | 0.4966 | <0.0001 |
| VPS26A    | 0.906 | 0.4967 | <0.0001 |
| PNKP      | 0.835 | 0.4968 | <0.0001 |
| CMTR1     | 0.891 | 0.497  | 0.0042  |
| DTNBP1    | 0.878 | 0.4972 | <0.0001 |
| NPM2      | 0.717 | 0.4975 | <0.0001 |
| HIC2      | 0.796 | 0.4976 | <0.0001 |
| GALK2     | 0.869 | 0.4976 | <0.0001 |
| UBFD1     | 0.855 | 0.4978 | <0.0001 |
| STEAP1B   | 0.607 | 0.4979 | <0.0001 |
| MAP3K7CL  | 0.728 | 0.4979 | <0.0001 |
| MATR3     | 0.929 | 0.4979 | <0.0001 |
| CC2D1B    | 0.896 | 0.498  | <0.0001 |
| NIN       | 0.926 | 0.4981 | <0.0001 |

|           |       |        |         |
|-----------|-------|--------|---------|
| BTBD10    | 0.871 | 0.4983 | <0.0001 |
| KCNJ5     | 0.946 | 0.4984 | <0.0001 |
| COL8A1    | 0.867 | 0.4985 | <0.0001 |
| DUOX1     | 0.809 | 0.4986 | <0.0001 |
| TAZ       | 0.909 | 0.4986 | <0.0001 |
| AP4E1     | 0.907 | 0.4987 | <0.0001 |
| EIF3M     | 0.932 | 0.4988 | <0.0001 |
| YTHDF3    | 0.793 | 0.4989 | <0.0001 |
| RPLP2     | 0.941 | 0.499  | 0.0001  |
| FAM171A2  | 0.905 | 0.499  | 0.0003  |
| FGFR4     | 0.873 | 0.499  | <0.0001 |
| RSU1      | 0.907 | 0.499  | <0.0001 |
| PTRH1     | 0.965 | 0.4991 | 0.0049  |
| ATP6V1A   | 0.894 | 0.4991 | <0.0001 |
| TARS2     | 0.856 | 0.4992 | <0.0001 |
| UEVLD     | 0.885 | 0.4993 | <0.0001 |
| DXO       | 0.954 | 0.4995 | 0.0454  |
| CSPP1     | 0.784 | 0.4995 | <0.0001 |
| C6orf226  | 0.85  | 0.4995 | <0.0001 |
| TSC1      | 0.935 | 0.4995 | <0.0001 |
| SMARCC2   | 0.926 | 0.4997 | <0.0001 |
| LOC389641 | 0.912 | 0.4998 | 0.029   |
| MRPL18    | 0.831 | 0.5    | <0.0001 |
| TAL2      | 0.832 | 0.5005 | <0.0001 |
| RPA2      | 0.869 | 0.5005 | <0.0001 |
| CYP51A1   | 0.887 | 0.5005 | <0.0001 |
| MAP4K3    | 0.843 | 0.5007 | <0.0001 |
| DCAF4     | 0.804 | 0.5008 | <0.0001 |
| CCDC51    | 0.889 | 0.5008 | <0.0001 |
| CEP83     | 0.886 | 0.5009 | 0.0027  |
| MED29     | 0.844 | 0.5009 | <0.0001 |
| NXPH4     | 0.903 | 0.5011 | <0.0001 |
| TWF2      | 0.885 | 0.5012 | <0.0001 |

|              |       |        |         |
|--------------|-------|--------|---------|
| MFAP3        | 0.838 | 0.5013 | <0.0001 |
| XAGE1A       | 0.064 | 0.5014 | <0.0001 |
| PPCDC        | 0.839 | 0.5018 | <0.0001 |
| TUBA4A       | 0.849 | 0.5018 | <0.0001 |
| PHOSPHO2     | 0.861 | 0.5018 | <0.0001 |
| LOC101927967 | 0     | 0.5019 | <0.0001 |
| EPDR1        | 0.627 | 0.5019 | <0.0001 |
| MRPL49       | 0.776 | 0.5019 | <0.0001 |
| PRPF4B       | 0.938 | 0.5019 | <0.0001 |
| OAZ3         | 0.834 | 0.502  | <0.0001 |
| THOC3        | 0.848 | 0.5021 | <0.0001 |
| NUCKS1       | 0.863 | 0.5021 | <0.0001 |
| TMEM230      | 0.693 | 0.5023 | <0.0001 |
| ZNF85        | 0.821 | 0.5023 | <0.0001 |
| SPATA45      | 0.77  | 0.5027 | 0.0002  |
| ZNF532       | 0.712 | 0.5027 | <0.0001 |
| FKBP9P1      | 0.261 | 0.5029 | <0.0001 |
| CHMP4B       | 0.86  | 0.503  | <0.0001 |
| MIR1307      | 0     | 0.5031 | 0.0021  |
| DRG2         | 0.832 | 0.5032 | <0.0001 |
| MOB2         | 0.934 | 0.5033 | 0.0032  |
| NPIPA2       | 0     | 0.5033 | 0.0127  |
| ACSM1        | 0.665 | 0.5033 | <0.0001 |
| TMEM218      | 0.751 | 0.5033 | <0.0001 |
| SEC22A       | 0.843 | 0.5033 | <0.0001 |
| FADS2        | 0.824 | 0.5035 | <0.0001 |
| RN7SKP79     | 0.714 | 0.5037 | 0.0244  |
| PREB         | 0.861 | 0.504  | <0.0001 |
| SNHG7        | 0.792 | 0.5041 | 0.0002  |
| TMEM201      | 0.927 | 0.5043 | 0.0006  |
| AFP          | 0.828 | 0.5043 | <0.0001 |
| OGDH         | 0.872 | 0.5043 | <0.0001 |
| LINC00648    | 0.575 | 0.5044 | <0.0001 |

|           |       |        |         |
|-----------|-------|--------|---------|
| SLC5A11   | 0.658 | 0.5045 | <0.0001 |
| TRPC6     | 0.923 | 0.5047 | <0.0001 |
| FOXCUT    | 0     | 0.505  | <0.0001 |
| MRPL21    | 0.826 | 0.5051 | <0.0001 |
| HIST2H3D  | 0.699 | 0.5052 | <0.0001 |
| E2F6      | 0.908 | 0.5052 | <0.0001 |
| HCN3      | 0.778 | 0.5053 | <0.0001 |
| SLAMF8    | 0.86  | 0.5053 | <0.0001 |
| C1DP1     | 0     | 0.5054 | <0.0001 |
| ZYX       | 0.882 | 0.5056 | <0.0001 |
| C2orf69   | 0.906 | 0.5056 | <0.0001 |
| PPP1R37   | 0.538 | 0.5057 | <0.0001 |
| TRIM52    | 0.954 | 0.5061 | 0.0004  |
| EXOC8     | 0.864 | 0.5061 | <0.0001 |
| EEF1G     | 0.976 | 0.5062 | 0.0268  |
| CBX5      | 0.887 | 0.5062 | <0.0001 |
| NUP210P3  | 0.118 | 0.5063 | <0.0001 |
| ZNF777    | 0.882 | 0.5063 | <0.0001 |
| G3BP1     | 0.902 | 0.5063 | <0.0001 |
| CDC5L     | 0.901 | 0.5066 | <0.0001 |
| FLJ31104  | 0.681 | 0.5067 | 0.0254  |
| PTOV1     | 0.928 | 0.5067 | <0.0001 |
| PIGS      | 0.713 | 0.5068 | <0.0001 |
| PLIN3     | 0.786 | 0.5068 | <0.0001 |
| U2SURP    | 0.854 | 0.5068 | <0.0001 |
| PRR3      | 0.878 | 0.5068 | <0.0001 |
| MOSPD2    | 0.852 | 0.5069 | <0.0001 |
| GBF1      | 0.918 | 0.507  | <0.0001 |
| RHPN1-AS1 | 0.928 | 0.5073 | 0.011   |
| EXOSC3P1  | 0.328 | 0.5073 | <0.0001 |
| AARS      | 0.793 | 0.5073 | <0.0001 |
| KHDRBS3   | 0.816 | 0.5073 | <0.0001 |
| MOB3B     | 0.707 | 0.5074 | <0.0001 |

|              |       |        |         |
|--------------|-------|--------|---------|
| SMIM15       | 0.836 | 0.5075 | 0.0005  |
| MFSD13A      | 0.199 | 0.5076 | <0.0001 |
| XAGE1B       | 0.729 | 0.5076 | <0.0001 |
| NIPAL3       | 0.79  | 0.5077 | <0.0001 |
| AKT1S1       | 0.87  | 0.5078 | <0.0001 |
| LINC00390    | 0     | 0.5079 | <0.0001 |
| CDC37        | 0.844 | 0.5079 | <0.0001 |
| TES          | 0.887 | 0.5079 | <0.0001 |
| ZKSCAN8      | 0.957 | 0.5081 | 0.0348  |
| TTC9         | 0.851 | 0.5082 | <0.0001 |
| CAMK2N2      | 0.863 | 0.5082 | <0.0001 |
| CAP1         | 0.898 | 0.5082 | <0.0001 |
| CPE          | 0.834 | 0.5083 | <0.0001 |
| ZNF232       | 0.843 | 0.5083 | <0.0001 |
| ARPC4        | 0.902 | 0.5084 | <0.0001 |
| ZNF622       | 0.905 | 0.5084 | <0.0001 |
| HSPA9        | 0.909 | 0.5084 | <0.0001 |
| LRRC37B      | 0.826 | 0.5085 | <0.0001 |
| COPS8        | 0.904 | 0.5085 | <0.0001 |
| NFKBIE       | 0.86  | 0.5089 | <0.0001 |
| WASF2        | 0.826 | 0.5091 | <0.0001 |
| TCAM1P       | 0.467 | 0.5092 | <0.0001 |
| MLST8        | 0.666 | 0.5092 | <0.0001 |
| HIGD2A       | 0.898 | 0.5093 | <0.0001 |
| RECQL5       | 0.912 | 0.5093 | <0.0001 |
| COL5A3       | 0.768 | 0.5096 | <0.0001 |
| SMAD3        | 0.887 | 0.5096 | <0.0001 |
| WRAP73       | 0.659 | 0.5098 | <0.0001 |
| EXOSC3       | 0.844 | 0.5098 | <0.0001 |
| DCP2         | 0.871 | 0.5102 | <0.0001 |
| GPATCH3      | 0.89  | 0.5103 | <0.0001 |
| LOC101928896 | 0     | 0.5104 | <0.0001 |
| USP11        | 0.814 | 0.5104 | <0.0001 |



|          |       |        |         |
|----------|-------|--------|---------|
| VPS8     | 0.927 | 0.5104 | <0.0001 |
| ABCB6    | 0.904 | 0.5105 | <0.0001 |
| TUBD1    | 0.856 | 0.5106 | <0.0001 |
| FRMD8    | 0.831 | 0.5107 | <0.0001 |
| CORO1B   | 0.912 | 0.5107 | <0.0001 |
| MYCBP    | 0.868 | 0.5108 | <0.0001 |
| PSEN2    | 0.878 | 0.5108 | <0.0001 |
| RPGRIP1L | 0.783 | 0.5109 | <0.0001 |
| NUCB2    | 0.831 | 0.5109 | <0.0001 |
| C6orf62  | 0.858 | 0.511  | <0.0001 |
| ADM2     | 0.942 | 0.511  | <0.0001 |
| DPH3P1   | 0.687 | 0.5111 | <0.0001 |
| SCN4A    | 0.911 | 0.5111 | <0.0001 |
| PMCH     | 0.919 | 0.5111 | <0.0001 |
| ARMC7    | 0.939 | 0.5112 | <0.0001 |
| PIN1     | 0.723 | 0.5113 | <0.0001 |
| WDR26    | 0.895 | 0.5113 | <0.0001 |
| FBXO27   | 0.739 | 0.5114 | <0.0001 |
| TMED2    | 0.869 | 0.5115 | <0.0001 |
| FARSA    | 0.849 | 0.5118 | <0.0001 |
| TOMM22   | 0.909 | 0.5119 | <0.0001 |
| SF3B3    | 0.81  | 0.512  | <0.0001 |
| PPIC     | 0.916 | 0.512  | <0.0001 |
| NT5C3B   | 0.486 | 0.5122 | <0.0001 |
| KPTN     | 0.747 | 0.5122 | <0.0001 |
| ZNF891   | 0.927 | 0.5124 | 0.0106  |
| EVI5L    | 0.819 | 0.5124 | <0.0001 |
| NPEPPS   | 0.871 | 0.5124 | <0.0001 |
| TAF5L    | 0.882 | 0.5124 | <0.0001 |
| PTPMT1   | 0.918 | 0.5124 | <0.0001 |
| IDH3B    | 0.866 | 0.5126 | <0.0001 |
| UBTF     | 0.873 | 0.5128 | <0.0001 |
| KCTD1    | 0.868 | 0.513  | <0.0001 |

|           |       |        |         |
|-----------|-------|--------|---------|
| ERICH2    | 0.059 | 0.5131 | <0.0001 |
| SRGAP2B   | 0.16  | 0.5131 | <0.0001 |
| MPP7      | 0.678 | 0.5134 | <0.0001 |
| LYZ       | 0.921 | 0.5134 | <0.0001 |
| LRRC45    | 0.846 | 0.5135 | <0.0001 |
| PUS7L     | 0.878 | 0.5136 | <0.0001 |
| FBXO5     | 0.872 | 0.5137 | <0.0001 |
| ASXL2     | 0.833 | 0.514  | <0.0001 |
| GPS1      | 0.863 | 0.5141 | <0.0001 |
| SULT1C2P1 | 0.474 | 0.5144 | <0.0001 |
| ZNF212    | 0.887 | 0.5144 | <0.0001 |
| HSPA5     | 0.899 | 0.5145 | <0.0001 |
| AREL1     | 0.929 | 0.5147 | 0.0061  |
| TM4SF20   | 0.615 | 0.5147 | <0.0001 |
| ZNF77     | 0.824 | 0.5149 | <0.0001 |
| MCTS1     | 0.917 | 0.5149 | <0.0001 |
| HIST1H2AJ | 0.846 | 0.5151 | <0.0001 |
| FBLN7     | 0.85  | 0.5151 | <0.0001 |
| RPL26L1   | 0.88  | 0.5151 | <0.0001 |
| SFT2D3    | 0.83  | 0.5152 | <0.0001 |
| FAM220CP  | 0     | 0.5154 | <0.0001 |
| MBOAT7    | 0.725 | 0.5154 | <0.0001 |
| ALPK3     | 0.882 | 0.5155 | <0.0001 |
| DYNC1LI1  | 0.878 | 0.5158 | <0.0001 |
| GYG1      | 0.918 | 0.5158 | <0.0001 |
| ZC2HC1A   | 0.762 | 0.5159 | <0.0001 |
| RAB5C     | 0.841 | 0.5159 | <0.0001 |
| S100A3    | 0.897 | 0.5159 | <0.0001 |
| SPATA5L1  | 0.84  | 0.5163 | <0.0001 |
| SNUPN     | 0.865 | 0.5163 | <0.0001 |
| HILPDA    | 0.918 | 0.5164 | 0.0015  |
| MIER2     | 0.794 | 0.5165 | <0.0001 |
| DCAF17    | 0.908 | 0.5165 | <0.0001 |

|           |       |        |         |
|-----------|-------|--------|---------|
| TMEM145   | 0.78  | 0.5166 | <0.0001 |
| CCDC15    | 0.901 | 0.5168 | <0.0001 |
| SLC22A23  | 0.806 | 0.5169 | <0.0001 |
| LIN28B    | 0.579 | 0.5171 | <0.0001 |
| CIB2      | 0.87  | 0.5171 | <0.0001 |
| SPACA9    | 0.559 | 0.5172 | 0.0152  |
| LOC148709 | 0.745 | 0.5172 | <0.0001 |
| LOC440028 | 0.761 | 0.5173 | 0.0422  |
| TET1      | 0.8   | 0.5173 | <0.0001 |
| BAIAP2L1  | 0.861 | 0.5174 | <0.0001 |
| TMEM161A  | 0.746 | 0.5175 | <0.0001 |
| SBF1      | 0.892 | 0.5176 | <0.0001 |
| SMC1A     | 0.898 | 0.5177 | <0.0001 |
| DOCK7     | 0.857 | 0.5178 | <0.0001 |
| SLCO6A1   | 0.628 | 0.5179 | <0.0001 |
| INTS4     | 0.871 | 0.5181 | <0.0001 |
| MAPKBP1   | 0.885 | 0.5182 | <0.0001 |
| UIMC1     | 0.884 | 0.5184 | <0.0001 |
| DHX29     | 0.868 | 0.5186 | <0.0001 |
| BRD9      | 0.865 | 0.5187 | <0.0001 |
| CSNK2A3   | 0.447 | 0.5188 | <0.0001 |
| RPS14     | 0.875 | 0.5188 | <0.0001 |
| PAIP2     | 0.916 | 0.5188 | <0.0001 |
| ARL8B     | 0.896 | 0.5189 | <0.0001 |
| IPO4      | 0.955 | 0.5191 | 0.0001  |
| GLRX3     | 0.822 | 0.5191 | <0.0001 |
| TMEM178B  | 0.862 | 0.5192 | 0.0035  |
| CLIC1P1   | 0.613 | 0.5192 | 0.0036  |
| PLEKHG2   | 0.831 | 0.5194 | <0.0001 |
| UBE2L3    | 0.834 | 0.5194 | <0.0001 |
| KCMF1     | 0.896 | 0.5194 | <0.0001 |
| GNAL      | 0.917 | 0.5194 | <0.0001 |
| GEMIN7    | 0.938 | 0.5195 | <0.0001 |

|           |       |        |         |
|-----------|-------|--------|---------|
| EMC3      | 0.949 | 0.5196 | 0.0172  |
| MFSD3     | 0.748 | 0.5199 | <0.0001 |
| HIST2H2BF | 0.865 | 0.5199 | <0.0001 |
| TRAF7     | 0.873 | 0.5199 | <0.0001 |
| PRRC2A    | 0.848 | 0.52   | <0.0001 |
| SPIN3     | 0.968 | 0.5201 | 0.0076  |
| SUGP1     | 0.611 | 0.5204 | <0.0001 |
| LINC00623 | 0.862 | 0.5205 | 0.0097  |
| PPP2R3B   | 0.924 | 0.5207 | 0.0004  |
| MYB       | 0.823 | 0.5207 | <0.0001 |
| ZC3H8     | 0.879 | 0.5207 | <0.0001 |
| MCCD1P2   | 0     | 0.5208 | <0.0001 |
| ADCK1     | 0.843 | 0.5208 | <0.0001 |
| EFCAB7    | 0.857 | 0.5208 | <0.0001 |
| HIST1H4I  | 0.909 | 0.5208 | <0.0001 |
| UQCRB     | 0.913 | 0.5208 | <0.0001 |
| LOC145783 | 0.743 | 0.5209 | 0.0036  |
| FGF13     | 0.848 | 0.5209 | <0.0001 |
| STAG1     | 0.9   | 0.521  | <0.0001 |
| ZMAT5     | 0.93  | 0.5211 | <0.0001 |
| MORF4L2   | 0.903 | 0.5212 | <0.0001 |
| TMSB10    | 0.896 | 0.5214 | <0.0001 |
| RNU4-21P  | 0     | 0.5216 | <0.0001 |
| MIPOL1    | 0.749 | 0.5216 | <0.0001 |
| SMAD5     | 0.883 | 0.5216 | <0.0001 |
| DAGLA     | 0.812 | 0.5218 | <0.0001 |
| PLOD1     | 0.842 | 0.5218 | <0.0001 |
| ARMC9     | 0.868 | 0.5218 | <0.0001 |
| TEX10     | 0.899 | 0.5219 | <0.0001 |
| NFYC      | 0.856 | 0.5221 | <0.0001 |
| MED10     | 0.859 | 0.5222 | <0.0001 |
| CAPN11    | 0.946 | 0.5222 | <0.0001 |
| C17orf82  | 0.894 | 0.5223 | <0.0001 |

|              |       |        |         |
|--------------|-------|--------|---------|
| POPDC3       | 0.355 | 0.5224 | <0.0001 |
| MUS81        | 0.885 | 0.5224 | <0.0001 |
| RN7SL76P     | 0     | 0.5225 | <0.0001 |
| LINC00880    | 0.458 | 0.5225 | <0.0001 |
| PABPC1P1     | 0.482 | 0.5225 | <0.0001 |
| LINC01518    | 0.491 | 0.5226 | <0.0001 |
| PCBP1        | 0.897 | 0.5227 | <0.0001 |
| EGFEM1P      | 0.386 | 0.5228 | <0.0001 |
| HMG2         | 0.894 | 0.5228 | <0.0001 |
| CD24P4       | 0     | 0.5231 | <0.0001 |
| SLC25A6      | 0.923 | 0.5231 | <0.0001 |
| HIST1H1C     | 0.896 | 0.5234 | <0.0001 |
| CFAP53       | 0.253 | 0.5236 | <0.0001 |
| TM4SF19      | 0.753 | 0.5236 | <0.0001 |
| PRKD2        | 0.87  | 0.5237 | <0.0001 |
| C11orf68     | 0.849 | 0.5238 | <0.0001 |
| MEF2D        | 0.869 | 0.5238 | <0.0001 |
| UNC119B      | 0.812 | 0.524  | <0.0001 |
| MAGO8        | 0.856 | 0.5243 | <0.0001 |
| HMG2P27      | 0     | 0.5245 | <0.0001 |
| LOC730101    | 0.597 | 0.5245 | <0.0001 |
| FAM98C       | 0.874 | 0.5246 | <0.0001 |
| MTX3         | 0.911 | 0.5247 | <0.0001 |
| PFAS         | 0.871 | 0.525  | <0.0001 |
| LINC00491    | 0.663 | 0.5252 | <0.0001 |
| DPY19L4      | 0.876 | 0.5254 | <0.0001 |
| RHBDD3       | 0.884 | 0.5254 | <0.0001 |
| DNAL4        | 0.825 | 0.5257 | <0.0001 |
| TIMMDC1      | 0.894 | 0.5258 | 0.0006  |
| PEX6         | 0.863 | 0.5258 | <0.0001 |
| LOC100652758 | 0.395 | 0.5259 | 0.0122  |
| FAM168B      | 0.83  | 0.5259 | <0.0001 |
| ACTR2        | 0.888 | 0.5259 | <0.0001 |

|           |       |        |         |
|-----------|-------|--------|---------|
| ZNHIT3    | 0.919 | 0.5261 | <0.0001 |
| RBMX      | 0.857 | 0.5262 | <0.0001 |
| CLVS1     | 0.801 | 0.5263 | <0.0001 |
| HIF1AN    | 0.888 | 0.5264 | <0.0001 |
| PLA2G4C   | 0.813 | 0.5265 | <0.0001 |
| SLC25A3   | 0.892 | 0.5265 | <0.0001 |
| C21orf58  | 0.911 | 0.5269 | <0.0001 |
| PRMT1     | 0.867 | 0.527  | <0.0001 |
| DDX42     | 0.87  | 0.527  | <0.0001 |
| GUSBP3    | 0.699 | 0.5271 | 0.001   |
| PCSK5     | 0.873 | 0.5271 | <0.0001 |
| EXOSC10   | 0.893 | 0.5271 | <0.0001 |
| TDG       | 0.935 | 0.5271 | <0.0001 |
| TMEM150B  | 0.936 | 0.5272 | 0.0016  |
| AP2M1     | 0.863 | 0.5272 | <0.0001 |
| NDUFA12   | 0.84  | 0.5273 | <0.0001 |
| LRRC37BP1 | 0.93  | 0.5274 | 0.0042  |
| CSAG4     | 0.182 | 0.5275 | <0.0001 |
| SNRNP200  | 0.923 | 0.5277 | 0.0002  |
| EDEM3     | 0.88  | 0.5277 | <0.0001 |
| TMEM160   | 0.864 | 0.5278 | <0.0001 |
| SNRPD3    | 0.886 | 0.528  | <0.0001 |
| QRICH1    | 0.91  | 0.528  | <0.0001 |
| PAQR9     | 0.701 | 0.5284 | <0.0001 |
| SLC25A44  | 0.879 | 0.5284 | <0.0001 |
| TBRG4     | 0.883 | 0.5284 | <0.0001 |
| TRAF3     | 0.87  | 0.5287 | <0.0001 |
| TBC1D22B  | 0.876 | 0.5288 | <0.0001 |
| GGH       | 0.885 | 0.5288 | <0.0001 |
| HACE1     | 0.878 | 0.5289 | <0.0001 |
| CHCHD4    | 0.879 | 0.5292 | <0.0001 |
| CASP1P2   | 0     | 0.5293 | <0.0001 |
| KATNA1    | 0.854 | 0.5293 | <0.0001 |

|           |       |        |         |
|-----------|-------|--------|---------|
| MIR23C    | 0.511 | 0.5295 | 0.0025  |
| MYO5A     | 0.796 | 0.5295 | <0.0001 |
| TRIM47    | 0.617 | 0.5296 | <0.0001 |
| RPS6KL1   | 0.737 | 0.5296 | <0.0001 |
| ZNF678    | 0.854 | 0.5297 | <0.0001 |
| DCAF8L2   | 0.468 | 0.5299 | <0.0001 |
| FAM81A    | 0.765 | 0.5299 | <0.0001 |
| PRND      | 0.733 | 0.5301 | <0.0001 |
| SNX17     | 0.872 | 0.5301 | <0.0001 |
| SMYD3-IT1 | 0.555 | 0.5302 | 0.0083  |
| ZBED5     | 0.896 | 0.5302 | <0.0001 |
| NDUFA2    | 0.918 | 0.5302 | <0.0001 |
| ZNF449    | 0.931 | 0.5302 | <0.0001 |
| COL1A1    | 0.778 | 0.5303 | <0.0001 |
| HAUS3     | 0.807 | 0.5303 | <0.0001 |
| UBE2Q2    | 0.825 | 0.5303 | <0.0001 |
| GSDMC     | 0.767 | 0.5305 | <0.0001 |
| TRAPPC4   | 0.883 | 0.5305 | <0.0001 |
| VCX       | 0.646 | 0.5306 | <0.0001 |
| KDELR3    | 0.858 | 0.5306 | <0.0001 |
| COX6A1    | 0.863 | 0.5306 | <0.0001 |
| VIL1      | 0.763 | 0.5309 | <0.0001 |
| CNNM4     | 0.81  | 0.5309 | <0.0001 |
| PDXK      | 0.838 | 0.5309 | <0.0001 |
| ZNF675    | 0.867 | 0.5309 | <0.0001 |
| ATP9A     | 0.891 | 0.5311 | <0.0001 |
| SRP72     | 0.923 | 0.5312 | <0.0001 |
| SLC48A1   | 0.78  | 0.5313 | <0.0001 |
| STX4      | 0.865 | 0.5313 | <0.0001 |
| EIF4ENIF1 | 0.764 | 0.5314 | <0.0001 |
| RAD9A     | 0.918 | 0.5315 | <0.0001 |
| MIR3121   | 0.395 | 0.5316 | 0.0018  |
| RPS6KA3   | 0.847 | 0.5316 | <0.0001 |

|           |       |        |         |
|-----------|-------|--------|---------|
| VAMP4     | 0.905 | 0.5317 | <0.0001 |
| TM9SF4    | 0.86  | 0.5318 | <0.0001 |
| USP46     | 0.888 | 0.5318 | <0.0001 |
| MRPS27    | 0.863 | 0.5319 | <0.0001 |
| SPATA24   | 0.898 | 0.5319 | <0.0001 |
| CEACAMP10 | 0     | 0.532  | <0.0001 |
| MAGEA3    | 0.905 | 0.532  | <0.0001 |
| FUS       | 0.911 | 0.5321 | <0.0001 |
| RNF216P1  | 0.698 | 0.5322 | 0.0001  |
| FIRRE     | 0.804 | 0.5322 | 0.0015  |
| WAC       | 0.867 | 0.5322 | <0.0001 |
| HOXD9     | 0.931 | 0.5322 | <0.0001 |
| STAG3L4   | 0.734 | 0.5323 | <0.0001 |
| INTS1     | 0.807 | 0.5323 | <0.0001 |
| GMPPA     | 0.853 | 0.5323 | <0.0001 |
| CEP97     | 0.884 | 0.5323 | <0.0001 |
| MUC15     | 0.615 | 0.5327 | <0.0001 |
| C12orf4   | 0.789 | 0.5327 | <0.0001 |
| ZNF71     | 0.886 | 0.5327 | <0.0001 |
| PORCN     | 0.866 | 0.533  | <0.0001 |
| CHCHD2    | 0.897 | 0.5332 | <0.0001 |
| KDM1A     | 0.794 | 0.5333 | <0.0001 |
| RN7SL329P | 0.629 | 0.5334 | 0.0056  |
| ACTN2     | 0.839 | 0.5334 | <0.0001 |
| UBXN1     | 0.867 | 0.5334 | <0.0001 |
| ATG10     | 0.921 | 0.5335 | <0.0001 |
| B3GALNT1  | 0.868 | 0.5336 | <0.0001 |
| HUWE1     | 0.87  | 0.5336 | <0.0001 |
| MIR3164   | 0     | 0.5337 | <0.0001 |
| OPTN      | 0.912 | 0.5337 | <0.0001 |
| ZSCAN32   | 0.95  | 0.5338 | 0.0166  |
| TMBIM1    | 0.87  | 0.5339 | <0.0001 |
| SEPHS1    | 0.916 | 0.5339 | <0.0001 |



|              |       |        |         |
|--------------|-------|--------|---------|
| RPL18        | 0.84  | 0.5342 | <0.0001 |
| DHRS11       | 0.678 | 0.5343 | <0.0001 |
| CASP8AP2     | 0.912 | 0.5343 | <0.0001 |
| ZBTB33       | 0.814 | 0.5344 | <0.0001 |
| GRWD1        | 0.836 | 0.5344 | <0.0001 |
| AARSD1       | 0.968 | 0.5346 | 0.0107  |
| MAP3K7       | 0.935 | 0.5347 | <0.0001 |
| RBM19        | 0.875 | 0.5348 | <0.0001 |
| RPL21P120    | 0     | 0.5349 | <0.0001 |
| CEP78        | 0.792 | 0.5349 | <0.0001 |
| B4GALT6      | 0.807 | 0.5353 | <0.0001 |
| EIF5A2       | 0.847 | 0.5355 | <0.0001 |
| ZNF8         | 0.878 | 0.5355 | <0.0001 |
| RAC3         | 0.829 | 0.5356 | <0.0001 |
| SNORD52      | 0.649 | 0.5361 | 0.0087  |
| TLDC2        | 0.844 | 0.5363 | 0.0001  |
| ERICH5       | 0.703 | 0.5363 | <0.0001 |
| MRPL14       | 0.869 | 0.5364 | <0.0001 |
| C11orf74     | 0.648 | 0.5366 | <0.0001 |
| RBX1         | 0.911 | 0.5366 | <0.0001 |
| FLYWCH2      | 0.893 | 0.5367 | <0.0001 |
| CCDC134      | 0.91  | 0.5367 | <0.0001 |
| REG1A        | 0.802 | 0.5368 | <0.0001 |
| RCBTB1       | 0.86  | 0.5369 | <0.0001 |
| LOC100506302 | 0.455 | 0.5371 | <0.0001 |
| MAGEA12      | 0.85  | 0.5371 | <0.0001 |
| FAR2P1       | 0.084 | 0.5372 | <0.0001 |
| ZCRB1        | 0.878 | 0.5372 | <0.0001 |
| RNF219       | 0.768 | 0.5374 | <0.0001 |
| HNRNPA1P10   | 0.346 | 0.5376 | <0.0001 |
| FOXN4        | 0.754 | 0.5376 | <0.0001 |
| DOCK6        | 0.868 | 0.5376 | <0.0001 |
| ZNF681       | 0.841 | 0.5377 | <0.0001 |

|           |       |        |         |
|-----------|-------|--------|---------|
| IPO7      | 0.874 | 0.5377 | <0.0001 |
| NOP10     | 0.885 | 0.5377 | <0.0001 |
| LOC440292 | 0.805 | 0.5379 | 0.0116  |
| PGD       | 0.783 | 0.5379 | <0.0001 |
| CUEDC1    | 0.802 | 0.538  | <0.0001 |
| TMEM169   | 0.827 | 0.5381 | <0.0001 |
| RPL37     | 0.933 | 0.5381 | <0.0001 |
| SAP30BP   | 0.801 | 0.5382 | <0.0001 |
| CRTAP     | 0.872 | 0.5382 | <0.0001 |
| RPL7      | 0.894 | 0.5382 | <0.0001 |
| ZNF138    | 0.91  | 0.5382 | <0.0001 |
| ZNF852    | 0.816 | 0.5384 | <0.0001 |
| TRNAU1AP  | 0.827 | 0.5384 | <0.0001 |
| PKNOX1    | 0.837 | 0.5384 | <0.0001 |
| DUTP2     | 0.506 | 0.5386 | 0.0443  |
| FAM136A   | 0.789 | 0.5386 | <0.0001 |
| TMEM64    | 0.846 | 0.5386 | <0.0001 |
| PLEKHH1   | 0.857 | 0.5389 | <0.0001 |
| LOC730076 | 0     | 0.5392 | <0.0001 |
| CSAG2     | 0.596 | 0.5393 | <0.0001 |
| BRWD3     | 0.902 | 0.5395 | <0.0001 |
| IGBP1     | 0.911 | 0.5395 | <0.0001 |
| STK24-AS1 | 0.582 | 0.5397 | <0.0001 |
| COMP      | 0.851 | 0.5398 | <0.0001 |
| MKRN2     | 0.842 | 0.5399 | <0.0001 |
| ANKRD40   | 0.887 | 0.5399 | <0.0001 |
| EIF5B     | 0.913 | 0.5399 | <0.0001 |
| IDUA      | 0.876 | 0.54   | <0.0001 |
| ABCB8     | 0.886 | 0.54   | <0.0001 |
| SLC7A5P2  | 0.484 | 0.5401 | <0.0001 |
| FPGT      | 0.871 | 0.5401 | <0.0001 |
| HIST1H4E  | 0.897 | 0.5403 | <0.0001 |
| BRF2      | 0.806 | 0.5404 | <0.0001 |

|             |       |        |         |
|-------------|-------|--------|---------|
| MMP1        | 0.86  | 0.5404 | <0.0001 |
| ANXA2P1     | 0.879 | 0.5405 | <0.0001 |
| GRK6        | 0.918 | 0.5405 | <0.0001 |
| RELB        | 0.864 | 0.5406 | <0.0001 |
| MMP14       | 0.889 | 0.5407 | <0.0001 |
| HSPH1       | 0.89  | 0.5407 | <0.0001 |
| DBET        | 0     | 0.5408 | <0.0001 |
| HDAC8       | 0.76  | 0.5408 | <0.0001 |
| EOGT        | 0.772 | 0.5409 | <0.0001 |
| CATIP-AS2   | 0.472 | 0.541  | <0.0001 |
| CYTH2       | 0.826 | 0.541  | <0.0001 |
| VAMP7       | 0.927 | 0.541  | <0.0001 |
| RUNDC3A-AS1 | 0.462 | 0.5411 | <0.0001 |
| KLHL22      | 0.822 | 0.5411 | <0.0001 |
| CCL25       | 0.845 | 0.5411 | <0.0001 |
| NPTN        | 0.901 | 0.5411 | <0.0001 |
| TDP1        | 0.916 | 0.5411 | <0.0001 |
| ZNF74       | 0.897 | 0.5412 | <0.0001 |
| LOC644436   | 0.467 | 0.5413 | <0.0001 |
| CD320       | 0.801 | 0.5413 | <0.0001 |
| ARL15       | 0.924 | 0.5417 | <0.0001 |
| PACS2       | 0.817 | 0.542  | <0.0001 |
| RPL39       | 0.838 | 0.5421 | <0.0001 |
| ILDR2       | 0.908 | 0.5421 | <0.0001 |
| TWF1        | 0.911 | 0.5421 | <0.0001 |
| PUS1        | 0.867 | 0.5423 | <0.0001 |
| GHET1       | 0     | 0.5425 | <0.0001 |
| SKP2        | 0.861 | 0.5425 | <0.0001 |
| PHTF2       | 0.847 | 0.5426 | <0.0001 |
| IMMP1L      | 0.896 | 0.5426 | <0.0001 |
| RAB11A      | 0.94  | 0.5426 | <0.0001 |
| TRMU        | 0.812 | 0.5427 | <0.0001 |
| ADSS        | 0.903 | 0.5427 | <0.0001 |

|              |       |        |         |
|--------------|-------|--------|---------|
| STX1A        | 0.856 | 0.5429 | <0.0001 |
| LZTR1        | 0.917 | 0.5429 | <0.0001 |
| THOC6        | 0.785 | 0.5435 | <0.0001 |
| ZBTB22       | 0.851 | 0.5435 | <0.0001 |
| HMG2P25      | 0.513 | 0.5439 | <0.0001 |
| SPARCL1      | 0.89  | 0.5439 | <0.0001 |
| FUCA2        | 0.864 | 0.544  | <0.0001 |
| TPM2         | 0.861 | 0.5442 | <0.0001 |
| RNU5A-8P     | 0.86  | 0.5443 | 0.0391  |
| HIST1H3F     | 0.895 | 0.5443 | <0.0001 |
| SNRPD2P1     | 0     | 0.5445 | <0.0001 |
| PLAG1        | 0.784 | 0.5445 | <0.0001 |
| LARP1P1      | 0     | 0.5446 | <0.0001 |
| RGP1         | 0.684 | 0.5446 | <0.0001 |
| LOC100287497 | 0.683 | 0.5447 | 0.0005  |
| GPD1L        | 0.846 | 0.5449 | <0.0001 |
| SNW1         | 0.887 | 0.5449 | <0.0001 |
| NDE1         | 0.9   | 0.5449 | <0.0001 |
| MCM8-AS1     | 0     | 0.545  | <0.0001 |
| FGD6         | 0.788 | 0.5451 | <0.0001 |
| ERBB3        | 0.929 | 0.5451 | <0.0001 |
| GAB2         | 0.909 | 0.5453 | <0.0001 |
| ITGAV        | 0.875 | 0.5455 | <0.0001 |
| ANKEF1       | 0.819 | 0.5456 | <0.0001 |
| PGS1         | 0.857 | 0.5456 | <0.0001 |
| DEGS1        | 0.878 | 0.5456 | <0.0001 |
| COG1         | 0.76  | 0.5462 | <0.0001 |
| FTH1P4       | 0.722 | 0.5464 | 0.0016  |
| ARFGEF1      | 0.848 | 0.5464 | <0.0001 |
| MVD          | 0.86  | 0.5464 | <0.0001 |
| WDSUB1       | 0.891 | 0.5465 | <0.0001 |
| LRRC20       | 0.926 | 0.5466 | <0.0001 |
| COMMD9       | 0.856 | 0.5468 | <0.0001 |

|             |       |        |         |
|-------------|-------|--------|---------|
| CIT         | 0.89  | 0.5468 | <0.0001 |
| ZNF815P     | 0.825 | 0.5469 | 0.0419  |
| COL24A1     | 0.631 | 0.5469 | <0.0001 |
| FAM86DP     | 0.72  | 0.5475 | 0.0004  |
| HDAC5       | 0.924 | 0.5475 | <0.0001 |
| RN7SL752P   | 0     | 0.5476 | <0.0001 |
| MAP4        | 0.887 | 0.5478 | <0.0001 |
| ATL3        | 0.889 | 0.5483 | <0.0001 |
| PTTG2       | 0.951 | 0.5484 | 0.0004  |
| NANS        | 0.891 | 0.5484 | <0.0001 |
| RHBDF2      | 0.851 | 0.5485 | <0.0001 |
| ZNF563      | 0.814 | 0.5486 | <0.0001 |
| TRMT61B     | 0.817 | 0.5487 | <0.0001 |
| PSMA4       | 0.878 | 0.5487 | <0.0001 |
| CEP162      | 0.919 | 0.5489 | 0.0055  |
| ZHX2        | 0.903 | 0.5489 | <0.0001 |
| SCAMP1-AS1  | 0.797 | 0.549  | 0.0022  |
| POLR3A      | 0.841 | 0.549  | <0.0001 |
| NMT1        | 0.901 | 0.549  | <0.0001 |
| ZNF146      | 0.911 | 0.549  | <0.0001 |
| LINC01589   | 0.473 | 0.5491 | <0.0001 |
| SUMO3       | 0.879 | 0.5494 | <0.0001 |
| DDAH2       | 0.823 | 0.5495 | <0.0001 |
| PRPF19      | 0.882 | 0.5496 | <0.0001 |
| C1orf56     | 0.879 | 0.5501 | <0.0001 |
| PRTFDC1     | 0.85  | 0.5503 | <0.0001 |
| RAB4B-EGLN2 | 0     | 0.5504 | 0.0001  |
| MAD2L2      | 0.763 | 0.5504 | <0.0001 |
| PP7080      | 0.488 | 0.5505 | <0.0001 |
| EIF1AD      | 0.824 | 0.5505 | <0.0001 |
| SPAG4       | 0.76  | 0.551  | <0.0001 |
| RSPH14      | 0.716 | 0.5512 | 0.012   |
| SMO         | 0.887 | 0.5513 | <0.0001 |

|               |       |        |         |
|---------------|-------|--------|---------|
| NUP153        | 0.92  | 0.5514 | <0.0001 |
| WDR55         | 0.804 | 0.5515 | <0.0001 |
| RN7SKP106     | 0.036 | 0.5516 | <0.0001 |
| SRP19         | 0.933 | 0.5516 | <0.0001 |
| FUNDC1        | 0.828 | 0.5519 | <0.0001 |
| PRDM15        | 0.841 | 0.552  | <0.0001 |
| EEF1DP1       | 0.594 | 0.5523 | <0.0001 |
| NLE1          | 0.851 | 0.5524 | <0.0001 |
| RGCC          | 0.948 | 0.5528 | 0.0108  |
| BCL2L2-PABPN1 | 0.222 | 0.5528 | <0.0001 |
| PMS2P1        | 0.834 | 0.5528 | <0.0001 |
| CRKL          | 0.926 | 0.5529 | <0.0001 |
| C19orf47      | 0.82  | 0.553  | <0.0001 |
| CDK2AP1       | 0.869 | 0.553  | <0.0001 |
| HIST1H2BO     | 0.908 | 0.553  | <0.0001 |
| ANKZF1        | 0.914 | 0.5536 | <0.0001 |
| SNRPA1        | 0.92  | 0.5536 | <0.0001 |
| MSI2          | 0.824 | 0.5537 | <0.0001 |
| CYB561D1      | 0.91  | 0.5538 | <0.0001 |
| PIGG          | 0.793 | 0.5539 | <0.0001 |
| OSR2          | 0.781 | 0.554  | <0.0001 |
| ELL3          | 0.87  | 0.554  | <0.0001 |
| WDR5          | 0.916 | 0.5541 | <0.0001 |
| HIST1H2BH     | 0.921 | 0.5541 | <0.0001 |
| BLOC1S4       | 0.82  | 0.5542 | <0.0001 |
| MAN1B1        | 0.851 | 0.5544 | <0.0001 |
| RPSA          | 0.852 | 0.5545 | <0.0001 |
| FERMT1        | 0.809 | 0.5546 | <0.0001 |
| FAM24B        | 0.863 | 0.5546 | <0.0001 |
| FAM45A        | 0.917 | 0.5546 | <0.0001 |
| HIST1H3E      | 0.899 | 0.5547 | <0.0001 |
| ARL2BP        | 0.909 | 0.5548 | <0.0001 |
| LINC00941     | 0.368 | 0.5549 | <0.0001 |

|              |       |        |         |
|--------------|-------|--------|---------|
| LINC01202    | 0.112 | 0.5551 | <0.0001 |
| SCAMP2       | 0.833 | 0.5552 | <0.0001 |
| VPS29        | 0.91  | 0.5554 | <0.0001 |
| TFAP2A-AS1   | 0.798 | 0.5555 | 0.0002  |
| BRD8         | 0.94  | 0.5555 | <0.0001 |
| STRN4        | 0.845 | 0.5556 | <0.0001 |
| DHX30        | 0.87  | 0.5556 | <0.0001 |
| RNF113A      | 0.872 | 0.5556 | <0.0001 |
| PHF20        | 0.879 | 0.5557 | <0.0001 |
| ZNF250       | 0.819 | 0.5559 | <0.0001 |
| RHEBL1       | 0.874 | 0.556  | <0.0001 |
| TMEM185B     | 0.866 | 0.5561 | <0.0001 |
| CDK5R1       | 0.918 | 0.5565 | <0.0001 |
| WDR92        | 0.969 | 0.5566 | 0.0044  |
| MIR5582      | 0     | 0.5567 | <0.0001 |
| XRCC4        | 0.869 | 0.5569 | <0.0001 |
| PPARG        | 0.89  | 0.5569 | <0.0001 |
| ARF5         | 0.87  | 0.5571 | <0.0001 |
| RPL27AP5     | 0.724 | 0.5577 | 0.0125  |
| NSDHL        | 0.714 | 0.5577 | <0.0001 |
| TP53BP1      | 0.87  | 0.5577 | <0.0001 |
| ATP23        | 0.187 | 0.5578 | <0.0001 |
| PDCD11       | 0.821 | 0.5578 | <0.0001 |
| MIR5091      | 0     | 0.558  | <0.0001 |
| LAMTOR5      | 0.904 | 0.5582 | 0.0008  |
| KLF13        | 0.877 | 0.5582 | <0.0001 |
| PARP4P2      | 0     | 0.5583 | <0.0001 |
| IFT74-AS1    | 0     | 0.5584 | <0.0001 |
| CYB561D2     | 0.906 | 0.5585 | <0.0001 |
| ACTR3        | 0.929 | 0.5585 | <0.0001 |
| MTFR1        | 0.851 | 0.5588 | <0.0001 |
| CSAG1        | 0.439 | 0.5589 | <0.0001 |
| SLC25A30-AS1 | 0.833 | 0.559  | 0.0364  |

|           |       |        |         |
|-----------|-------|--------|---------|
| HIST2H2AB | 0.893 | 0.559  | <0.0001 |
| WDR5B     | 0.915 | 0.559  | <0.0001 |
| COA1      | 0.893 | 0.5592 | 0.0008  |
| MAPK12    | 0.836 | 0.5597 | <0.0001 |
| NUP210    | 0.917 | 0.5597 | <0.0001 |
| YIF1B     | 0.897 | 0.5598 | <0.0001 |
| MYL8P     | 0.547 | 0.56   | <0.0001 |
| NSD1      | 0.885 | 0.5601 | <0.0001 |
| CPSF1     | 0.905 | 0.5601 | <0.0001 |
| ZNF836    | 0.794 | 0.5604 | <0.0001 |
| KLHDC8B   | 0.752 | 0.5606 | <0.0001 |
| H2BFS     | 0.747 | 0.5608 | <0.0001 |
| MLLT11    | 0.821 | 0.5609 | <0.0001 |
| TMEFF1    | 0.975 | 0.561  | 0.017   |
| ZBTB45    | 0.868 | 0.561  | <0.0001 |
| RN7SL128P | 0     | 0.5611 | <0.0001 |
| GGA3      | 0.948 | 0.5612 | <0.0001 |
| NT5C3A    | 0.733 | 0.5613 | <0.0001 |
| TMEM109   | 0.879 | 0.5615 | <0.0001 |
| MRPL53    | 0.79  | 0.5616 | <0.0001 |
| ZNF664    | 0.874 | 0.5616 | <0.0001 |
| SOS1      | 0.921 | 0.5617 | <0.0001 |
| TFIP11    | 0.874 | 0.5619 | <0.0001 |
| SEMA3G    | 0.859 | 0.562  | <0.0001 |
| NRF1      | 0.846 | 0.5621 | <0.0001 |
| GUK1      | 0.859 | 0.5621 | <0.0001 |
| KCTD2     | 0.871 | 0.5623 | <0.0001 |
| MTDH      | 0.888 | 0.5624 | <0.0001 |
| MIR3145   | 0     | 0.5625 | <0.0001 |
| NES       | 0.851 | 0.5625 | <0.0001 |
| PDCD10    | 0.89  | 0.5625 | <0.0001 |
| SMC1B     | 0.902 | 0.5626 | <0.0001 |
| FNTB      | 0.95  | 0.5631 | 0.0002  |



|           |       |        |         |
|-----------|-------|--------|---------|
| CIART     | 0.761 | 0.5632 | <0.0001 |
| PGK1      | 0.886 | 0.5635 | <0.0001 |
| RIOK1     | 0.86  | 0.5636 | <0.0001 |
| LRRC58    | 0.887 | 0.5636 | <0.0001 |
| TRAPPC13  | 0.892 | 0.5638 | 0.0004  |
| PNO1      | 0.88  | 0.5639 | <0.0001 |
| AMN1      | 0.864 | 0.564  | <0.0001 |
| ZNF787    | 0.872 | 0.5643 | <0.0001 |
| TAF1B     | 0.893 | 0.5644 | <0.0001 |
| FICD      | 0.87  | 0.5645 | <0.0001 |
| LRP12     | 0.773 | 0.5646 | <0.0001 |
| GLS       | 0.907 | 0.5647 | <0.0001 |
| RNU6-403P | 0     | 0.5648 | <0.0001 |
| KXD1      | 0.823 | 0.5649 | <0.0001 |
| RPS10P16  | 0.581 | 0.5651 | 0.0387  |
| HHIPL2    | 0.745 | 0.5652 | <0.0001 |
| ERCC8     | 0.81  | 0.5652 | <0.0001 |
| SDF2      | 0.885 | 0.5652 | <0.0001 |
| FAM162B   | 0.763 | 0.5654 | <0.0001 |
| GNAI1     | 0.892 | 0.5663 | <0.0001 |
| MIR922    | 0     | 0.5664 | 0.0014  |
| DTNB      | 0.89  | 0.5666 | <0.0001 |
| NIFK      | 0.949 | 0.5667 | 0.0394  |
| RNA5SP268 | 0.785 | 0.5668 | 0.0061  |
| PSMD10P2  | 0     | 0.5668 | <0.0001 |
| SNTA1     | 0.886 | 0.5668 | <0.0001 |
| FAM78B    | 0.831 | 0.5669 | <0.0001 |
| C12orf65  | 0.808 | 0.567  | <0.0001 |
| RNF4      | 0.9   | 0.567  | <0.0001 |
| FAM86EP   | 0.731 | 0.5671 | 0.0005  |
| STOML2    | 0.75  | 0.5676 | <0.0001 |
| HSP90AA1  | 0.902 | 0.5676 | <0.0001 |
| SLC39A13  | 0.831 | 0.5678 | <0.0001 |

|           |       |        |         |
|-----------|-------|--------|---------|
| SET       | 0.882 | 0.5678 | <0.0001 |
| ZMYM3     | 0.929 | 0.5678 | <0.0001 |
| NUPR1     | 0.787 | 0.568  | <0.0001 |
| SNRPF     | 0.887 | 0.5683 | <0.0001 |
| ELFN2     | 0.846 | 0.5685 | <0.0001 |
| NUP160    | 0.867 | 0.5685 | <0.0001 |
| GLB1      | 0.915 | 0.5685 | <0.0001 |
| LARP4B    | 0.822 | 0.5686 | <0.0001 |
| FATE1     | 0.894 | 0.5686 | <0.0001 |
| CCDC43    | 0.935 | 0.5686 | <0.0001 |
| RUNDC1    | 0.624 | 0.5687 | <0.0001 |
| SFTA1P    | 0.94  | 0.5688 | 0.0107  |
| NAIF1     | 0.717 | 0.5688 | <0.0001 |
| PTPRF     | 0.93  | 0.5688 | <0.0001 |
| SRGAP2C   | 0.919 | 0.5689 | 0.0044  |
| LINC00857 | 0.629 | 0.5689 | <0.0001 |
| GJA1      | 0.926 | 0.5689 | <0.0001 |
| CENPO     | 0.906 | 0.5691 | <0.0001 |
| GUCY2C    | 0.738 | 0.5692 | <0.0001 |
| PLXNA1    | 0.741 | 0.5692 | <0.0001 |
| BRD3      | 0.892 | 0.5692 | <0.0001 |
| TNFRSF4   | 0.949 | 0.5692 | <0.0001 |
| TMEM70    | 0.836 | 0.5693 | <0.0001 |
| LTA4H     | 0.899 | 0.5693 | <0.0001 |
| POLRMTP1  | 0     | 0.5696 | <0.0001 |
| ZNF461    | 0.835 | 0.5699 | <0.0001 |
| PFDN1     | 0.866 | 0.5699 | <0.0001 |
| TLK2      | 0.87  | 0.5699 | <0.0001 |
| FAM118B   | 0.88  | 0.57   | <0.0001 |
| GFPT1     | 0.906 | 0.57   | <0.0001 |
| PHB       | 0.909 | 0.57   | <0.0001 |
| SLC25A5   | 0.882 | 0.5702 | <0.0001 |
| POLR2J    | 0.878 | 0.5703 | <0.0001 |

|             |       |        |         |
|-------------|-------|--------|---------|
| CSMD1       | 0.851 | 0.5704 | <0.0001 |
| ZNF385D-AS1 | 0     | 0.5706 | <0.0001 |
| HIST1H2AB   | 0.898 | 0.5706 | <0.0001 |
| ANKRD54     | 0.792 | 0.5709 | <0.0001 |
| RAB24       | 0.948 | 0.5712 | 0.0001  |
| SLC33A1     | 0.914 | 0.5712 | <0.0001 |
| HPS4        | 0.927 | 0.5713 | <0.0001 |
| PYCR1       | 0.868 | 0.5715 | <0.0001 |
| GTSF1       | 0.418 | 0.5716 | <0.0001 |
| ARL4A       | 0.845 | 0.5718 | <0.0001 |
| TBC1D20     | 0.941 | 0.5718 | <0.0001 |
| NPM3        | 0.788 | 0.5719 | <0.0001 |
| CLPTM1L     | 0.871 | 0.572  | <0.0001 |
| RNA5SP470   | 0.527 | 0.5722 | <0.0001 |
| ZNF300      | 0.719 | 0.5722 | <0.0001 |
| PRC1-AS1    | 0.335 | 0.5723 | <0.0001 |
| YTHDF1      | 0.896 | 0.5723 | <0.0001 |
| STARD7      | 0.912 | 0.5723 | <0.0001 |
| GTF3C5      | 0.874 | 0.573  | <0.0001 |
| ZFAS1       | 0.951 | 0.5731 | 0.0403  |
| AGAP1       | 0.835 | 0.5731 | <0.0001 |
| MVB12A      | 0.684 | 0.5733 | <0.0001 |
| PMS2        | 0.878 | 0.5733 | <0.0001 |
| MRPL47      | 0.898 | 0.5734 | <0.0001 |
| RNF44       | 0.815 | 0.5735 | <0.0001 |
| TMEM44-AS1  | 0.879 | 0.5736 | 0.0054  |
| KLHL21      | 0.899 | 0.5736 | <0.0001 |
| ATP13A1     | 0.797 | 0.5738 | <0.0001 |
| CHKA        | 0.891 | 0.5738 | <0.0001 |
| SRFBP1      | 0.798 | 0.5739 | <0.0001 |
| METTL2A     | 0.914 | 0.5739 | <0.0001 |
| RNVU1-3     | 0     | 0.5741 | <0.0001 |
| CLCN2       | 0.883 | 0.5741 | <0.0001 |

|          |       |        |         |
|----------|-------|--------|---------|
| GUSBP2   | 0.903 | 0.5743 | 0.0034  |
| AP2B1    | 0.9   | 0.5747 | <0.0001 |
| ELOVL5   | 0.913 | 0.5747 | <0.0001 |
| EXOC3    | 0.9   | 0.575  | <0.0001 |
| ATG13    | 0.605 | 0.5751 | <0.0001 |
| TRIB3    | 0.855 | 0.5751 | <0.0001 |
| UBE3C    | 0.882 | 0.5751 | <0.0001 |
| KTI12    | 0.797 | 0.5752 | <0.0001 |
| SMAP1    | 0.932 | 0.5752 | <0.0001 |
| ZDHHC9   | 0.881 | 0.5753 | <0.0001 |
| TAF12    | 0.81  | 0.5754 | <0.0001 |
| NACA     | 0.927 | 0.5754 | <0.0001 |
| SNORD48  | 0.814 | 0.5755 | <0.0001 |
| KDEL2    | 0.854 | 0.5755 | <0.0001 |
| DR1      | 0.878 | 0.5756 | <0.0001 |
| FASN     | 0.892 | 0.5756 | <0.0001 |
| RTN3     | 0.867 | 0.5757 | <0.0001 |
| CHCHD2P6 | 0.59  | 0.5758 | <0.0001 |
| UBE2D2   | 0.911 | 0.5758 | <0.0001 |
| EPHX4    | 0.83  | 0.576  | <0.0001 |
| TMEM168  | 0.84  | 0.5762 | <0.0001 |
| WIZ      | 0.851 | 0.5762 | <0.0001 |
| NPM1P8   | 0     | 0.5764 | <0.0001 |
| RPS18    | 0.9   | 0.5765 | <0.0001 |
| RPN1     | 0.905 | 0.5766 | <0.0001 |
| TUBB3    | 0.933 | 0.5768 | <0.0001 |
| KCNE3    | 0.925 | 0.5769 | <0.0001 |
| BCL7A    | 0.859 | 0.5771 | <0.0001 |
| VPS37C   | 0.87  | 0.5773 | <0.0001 |
| DUSP28   | 0.924 | 0.5774 | <0.0001 |
| PTDSS2   | 0.755 | 0.5776 | <0.0001 |
| CCDC127  | 0.833 | 0.5777 | <0.0001 |
| CYP17A1  | 0.798 | 0.5778 | <0.0001 |

|              |       |        |         |
|--------------|-------|--------|---------|
| PTGFRN       | 0.839 | 0.578  | <0.0001 |
| ZNF346       | 0.817 | 0.5781 | <0.0001 |
| RB1CC1       | 0.861 | 0.5781 | <0.0001 |
| METTL1       | 0.908 | 0.5782 | <0.0001 |
| NOA1         | 0.912 | 0.5787 | 0.0005  |
| KRT18P13     | 0     | 0.5787 | <0.0001 |
| ELDR         | 0     | 0.5788 | <0.0001 |
| CLTC         | 0.931 | 0.5788 | <0.0001 |
| ZHX1         | 0.85  | 0.5789 | <0.0001 |
| CD63         | 0.929 | 0.5791 | <0.0001 |
| ZBTB18       | 0.777 | 0.5793 | <0.0001 |
| GATAD2B      | 0.897 | 0.5793 | <0.0001 |
| TRIO         | 0.908 | 0.5793 | <0.0001 |
| EIF4G2       | 0.922 | 0.5793 | <0.0001 |
| ABT1         | 0.857 | 0.5794 | <0.0001 |
| PHF5A        | 0.878 | 0.5796 | <0.0001 |
| CMTM4        | 0.814 | 0.5798 | <0.0001 |
| HOXD8        | 0.909 | 0.5799 | <0.0001 |
| RNU7-35P     | 0.119 | 0.5801 | <0.0001 |
| ARPC2        | 0.908 | 0.5802 | <0.0001 |
| NOL10        | 0.907 | 0.5803 | <0.0001 |
| SLU7         | 0.891 | 0.5805 | <0.0001 |
| LIMK1        | 0.917 | 0.5805 | <0.0001 |
| ADCK5        | 0.875 | 0.5807 | <0.0001 |
| MAPKAPK5-AS1 | 0.877 | 0.5808 | 0.0003  |
| ATP6V0D2     | 0.886 | 0.5808 | <0.0001 |
| SIPA1L2      | 0.712 | 0.5809 | <0.0001 |
| ANKIB1       | 0.876 | 0.581  | <0.0001 |
| CHN1         | 0.855 | 0.5812 | <0.0001 |
| COPB1        | 0.907 | 0.5812 | <0.0001 |
| HIST1H3A     | 0.893 | 0.5814 | <0.0001 |
| MED22        | 0.89  | 0.5816 | <0.0001 |
| PVT1         | 0.943 | 0.5817 | 0.0115  |

|            |       |        |         |
|------------|-------|--------|---------|
| OTUD6B-AS1 | 0.928 | 0.5818 | 0.0388  |
| INPPL1     | 0.879 | 0.5818 | <0.0001 |
| B3GAT3     | 0.726 | 0.5819 | <0.0001 |
| LINC01509  | 0.452 | 0.582  | <0.0001 |
| ADNP2      | 0.926 | 0.5822 | <0.0001 |
| LOC728743  | 0.68  | 0.5826 | <0.0001 |
| PTRH2      | 0.916 | 0.583  | <0.0001 |
| PLPPR4     | 0.543 | 0.5831 | 0.0114  |
| MRPS7      | 0.724 | 0.5831 | <0.0001 |
| NDUFAF2    | 0.803 | 0.5832 | <0.0001 |
| UBA52P5    | 0.017 | 0.5834 | <0.0001 |
| LINC01003  | 0.39  | 0.5837 | <0.0001 |
| OR6E1P     | 0.123 | 0.5838 | <0.0001 |
| ELOVL2     | 0.854 | 0.5838 | <0.0001 |
| MAD2L1BP   | 0.906 | 0.5838 | <0.0001 |
| PLA2G1B    | 0.783 | 0.5841 | <0.0001 |
| SLC30A6    | 0.925 | 0.5841 | <0.0001 |
| ZFAND3     | 0.808 | 0.5842 | <0.0001 |
| DHX34      | 0.891 | 0.5842 | <0.0001 |
| ALKBH4     | 0.892 | 0.5842 | <0.0001 |
| ITPK1      | 0.846 | 0.5845 | <0.0001 |
| COLEC12    | 0.857 | 0.5845 | <0.0001 |
| LPCAT1     | 0.693 | 0.5846 | <0.0001 |
| NSFP1      | 0.768 | 0.5847 | 0.0419  |
| HIST2H3C   | 0.641 | 0.5847 | <0.0001 |
| CDCA7L     | 0.732 | 0.585  | <0.0001 |
| MAPK8IP2   | 0.938 | 0.585  | <0.0001 |
| MYCN       | 0.837 | 0.5851 | <0.0001 |
| CHMP3      | 0.796 | 0.5852 | <0.0001 |
| ONECUT2    | 0.908 | 0.5853 | <0.0001 |
| POLR2H     | 0.894 | 0.5856 | <0.0001 |
| ATP6AP2    | 0.908 | 0.5857 | <0.0001 |
| AMBRA1     | 0.864 | 0.5858 | <0.0001 |

|           |       |        |         |
|-----------|-------|--------|---------|
| MXD3      | 0.868 | 0.5858 | <0.0001 |
| PSMC1P10  | 0     | 0.586  | <0.0001 |
| UPK3A     | 0.768 | 0.586  | <0.0001 |
| UTP20     | 0.889 | 0.586  | <0.0001 |
| LOC646762 | 0.783 | 0.5862 | 0.0003  |
| SLC25A51  | 0.8   | 0.5864 | <0.0001 |
| MRPL17    | 0.91  | 0.5864 | <0.0001 |
| GATA2-AS1 | 0.237 | 0.5865 | <0.0001 |
| SHQ1      | 0.887 | 0.5865 | <0.0001 |
| DDX23     | 0.898 | 0.5865 | <0.0001 |
| ASIC1     | 0.82  | 0.5866 | <0.0001 |
| BTBD3     | 0.906 | 0.5866 | <0.0001 |
| ACAD9     | 0.743 | 0.5867 | <0.0001 |
| MED25     | 0.907 | 0.5869 | <0.0001 |
| IMPAD1    | 0.83  | 0.5872 | <0.0001 |
| ZNF526    | 0.901 | 0.5872 | <0.0001 |
| CENPB     | 0.824 | 0.5873 | <0.0001 |
| ACYP1     | 0.881 | 0.5873 | <0.0001 |
| STAMBPL1  | 0.769 | 0.5874 | <0.0001 |
| CBX2      | 0.932 | 0.5875 | <0.0001 |
| LINC01560 | 0     | 0.5876 | <0.0001 |
| TRIM71    | 0.811 | 0.5876 | <0.0001 |
| LIMK2     | 0.894 | 0.5876 | <0.0001 |
| VPS54     | 0.905 | 0.5876 | <0.0001 |
| SEC11A    | 0.837 | 0.5877 | <0.0001 |
| IQCC      | 0.932 | 0.5877 | <0.0001 |
| FBXO46    | 0.868 | 0.5879 | <0.0001 |
| PKP4      | 0.867 | 0.588  | <0.0001 |
| KHSRP     | 0.833 | 0.5882 | <0.0001 |
| P2RX4     | 0.849 | 0.5884 | <0.0001 |
| NIFK-AS1  | 0.871 | 0.5887 | 0.0061  |
| PTMA      | 0.778 | 0.5887 | <0.0001 |
| RBM12     | 0.925 | 0.5889 | <0.0001 |

|           |       |        |         |
|-----------|-------|--------|---------|
| IDI1      | 0.879 | 0.589  | <0.0001 |
| SLC7A6OS  | 0.71  | 0.5892 | <0.0001 |
| C6orf136  | 0.79  | 0.5894 | <0.0001 |
| SF3A2     | 0.845 | 0.5894 | <0.0001 |
| SHISA4    | 0.718 | 0.5896 | <0.0001 |
| ECD       | 0.902 | 0.5896 | <0.0001 |
| PTPRA     | 0.877 | 0.5897 | <0.0001 |
| FTH1P2    | 0.814 | 0.5899 | 0.022   |
| TEFM      | 0.905 | 0.5903 | 0.0001  |
| ABHD17C   | 0.608 | 0.5903 | <0.0001 |
| MIR1244-1 | 0     | 0.5904 | 0.0008  |
| SSC4D     | 0     | 0.5904 | <0.0001 |
| DBR1      | 0.872 | 0.5905 | <0.0001 |
| BAX       | 0.911 | 0.5906 | <0.0001 |
| ZNF669    | 0.91  | 0.5907 | <0.0001 |
| GEMIN5    | 0.85  | 0.5908 | <0.0001 |
| UBA52     | 0.904 | 0.5908 | <0.0001 |
| KIAA0232  | 0.88  | 0.5909 | <0.0001 |
| AGFG1     | 0.875 | 0.591  | <0.0001 |
| TCTEX1D2  | 0.838 | 0.5915 | <0.0001 |
| ZNF530    | 0.763 | 0.5917 | <0.0001 |
| PMFBP1    | 0.859 | 0.5917 | <0.0001 |
| GMCL1     | 0.873 | 0.5918 | <0.0001 |
| ASF1A     | 0.91  | 0.5919 | <0.0001 |
| SULF1     | 0.752 | 0.592  | <0.0001 |
| MTX2      | 0.861 | 0.592  | <0.0001 |
| NEK4      | 0.906 | 0.592  | <0.0001 |
| TMEM251   | 0.746 | 0.5921 | <0.0001 |
| ARL2      | 0.793 | 0.5921 | <0.0001 |
| TAOK1     | 0.899 | 0.5921 | <0.0001 |
| CXorf56   | 0.921 | 0.5921 | <0.0001 |
| MRPL51    | 0.878 | 0.5926 | <0.0001 |
| GEMIN2    | 0.615 | 0.5928 | <0.0001 |



|           |       |        |         |
|-----------|-------|--------|---------|
| TATDN3    | 0.918 | 0.5928 | <0.0001 |
| ACTG1P4   | 0.34  | 0.593  | 0.0321  |
| PCNX3     | 0.643 | 0.5931 | 0.0157  |
| DNAJC5    | 0.889 | 0.5932 | <0.0001 |
| NME7      | 0.909 | 0.5933 | <0.0001 |
| THEM6     | 0.72  | 0.5934 | <0.0001 |
| ERI3      | 0.864 | 0.5939 | <0.0001 |
| HIST1H2AD | 0.894 | 0.5939 | <0.0001 |
| PARG      | 0.892 | 0.5941 | <0.0001 |
| ZNF3      | 0.917 | 0.5943 | <0.0001 |
| MED27     | 0.861 | 0.5944 | <0.0001 |
| NPAS2     | 0.894 | 0.5946 | <0.0001 |
| TLE1      | 0.856 | 0.5947 | <0.0001 |
| NDUFA8    | 0.856 | 0.5948 | <0.0001 |
| CSNK1E    | 0.886 | 0.595  | <0.0001 |
| RN7SKP97  | 0.566 | 0.5951 | 0.0012  |
| REEP4     | 0.67  | 0.5954 | <0.0001 |
| POLR3K    | 0.859 | 0.5954 | <0.0001 |
| USF1      | 0.88  | 0.5954 | <0.0001 |
| DTD2      | 0.464 | 0.5955 | <0.0001 |
| FOXS1     | 0.893 | 0.5955 | <0.0001 |
| HIST1H2AK | 0.895 | 0.5955 | <0.0001 |
| SPAST     | 0.903 | 0.5955 | <0.0001 |
| ARFRP1    | 0.871 | 0.5957 | <0.0001 |
| ANXA2P3   | 0.773 | 0.5958 | <0.0001 |
| TCERG1    | 0.923 | 0.5958 | <0.0001 |
| PFKFB2    | 0.884 | 0.5959 | <0.0001 |
| DYM       | 0.888 | 0.5961 | <0.0001 |
| LINC00535 | 0.851 | 0.5964 | 0.0005  |
| CHCHD6    | 0.838 | 0.5965 | <0.0001 |
| TPM3P9    | 0.808 | 0.5967 | 0.0114  |
| PIGZ      | 0.689 | 0.5967 | <0.0001 |
| PRDM4     | 0.837 | 0.597  | <0.0001 |

|           |       |        |         |
|-----------|-------|--------|---------|
| CD46      | 0.887 | 0.5971 | <0.0001 |
| NME1-NME2 | 0.916 | 0.5972 | 0.0231  |
| PTPN23    | 0.853 | 0.5972 | <0.0001 |
| DENND4B   | 0.863 | 0.5974 | <0.0001 |
| BCORL1    | 0.874 | 0.5974 | <0.0001 |
| BTN2A2    | 0.9   | 0.5974 | <0.0001 |
| ANP32A    | 0.919 | 0.5974 | <0.0001 |
| PAQR9-AS1 | 0.342 | 0.5975 | <0.0001 |
| TBL1XR1   | 0.848 | 0.5975 | <0.0001 |
| CD2AP     | 0.913 | 0.5976 | <0.0001 |
| UCHL1     | 0.758 | 0.5977 | <0.0001 |
| SLX4      | 0.812 | 0.5977 | <0.0001 |
| ARPP19    | 0.873 | 0.5978 | <0.0001 |
| NUB1      | 0.914 | 0.5979 | <0.0001 |
| SVIL-AS1  | 0.585 | 0.598  | 0.0175  |
| RNPS1     | 0.859 | 0.5981 | <0.0001 |
| LINC01526 | 0     | 0.5982 | <0.0001 |
| ZNF398    | 0.873 | 0.5984 | <0.0001 |
| EP400     | 0.89  | 0.5984 | <0.0001 |
| NDUFB1P1  | 0.285 | 0.5987 | <0.0001 |
| RPP38     | 0.918 | 0.5987 | <0.0001 |
| NAP1L4    | 0.88  | 0.5989 | <0.0001 |
| MIR548AR  | 0.252 | 0.5991 | <0.0001 |
| MED7      | 0.782 | 0.5992 | <0.0001 |
| MORN2     | 0.803 | 0.5992 | <0.0001 |
| LINC00346 | 0.578 | 0.5994 | <0.0001 |
| ACTR6     | 0.851 | 0.5994 | <0.0001 |
| UGDH      | 0.891 | 0.5994 | <0.0001 |
| MATN3     | 0.81  | 0.5996 | <0.0001 |
| VDAC1     | 0.815 | 0.5998 | <0.0001 |
| STT3B     | 0.902 | 0.5998 | <0.0001 |
| MCUR1     | 0.807 | 0.5999 | <0.0001 |
| HIST1H2BN | 0.905 | 0.5999 | <0.0001 |

|           |       |        |         |
|-----------|-------|--------|---------|
| GSTCD     | 0.927 | 0.5999 | <0.0001 |
| DNAJB2    | 0.881 | 0.6    | <0.0001 |
| CD58      | 0.883 | 0.6001 | <0.0001 |
| RPS16     | 0.888 | 0.6001 | <0.0001 |
| EXOSC9    | 0.893 | 0.6001 | <0.0001 |
| POLE3     | 0.872 | 0.6002 | <0.0001 |
| ATP2C1    | 0.898 | 0.6003 | <0.0001 |
| SCARA3    | 0.808 | 0.6004 | <0.0001 |
| AGK       | 0.899 | 0.6004 | <0.0001 |
| BBOX1-AS1 | 0.436 | 0.6006 | <0.0001 |
| CEBPA     | 0.887 | 0.6006 | <0.0001 |
| FAM21EP   | 0.65  | 0.6007 | 0.0221  |
| ZFP69     | 0.448 | 0.6007 | <0.0001 |
| KHDRBS1   | 0.928 | 0.6007 | <0.0001 |
| ZKSCAN4   | 0.826 | 0.6008 | <0.0001 |
| PTBP1     | 0.889 | 0.6008 | <0.0001 |
| MIR8087   | 0.031 | 0.6009 | <0.0001 |
| RPUSD1    | 0.823 | 0.6009 | <0.0001 |
| FBXW8     | 0.897 | 0.6013 | <0.0001 |
| HMBS      | 0.877 | 0.6016 | <0.0001 |
| OST4      | 0.953 | 0.6017 | 0.003   |
| RNU6-817P | 0.681 | 0.602  | 0.0035  |
| PFN4      | 0.87  | 0.6021 | <0.0001 |
| POGZ      | 0.924 | 0.6023 | <0.0001 |
| ZNF34     | 0.729 | 0.6024 | <0.0001 |
| EXOSC1    | 0.925 | 0.6026 | <0.0001 |
| AFAP1-AS1 | 0.426 | 0.603  | <0.0001 |
| ASAP3     | 0.907 | 0.6032 | <0.0001 |
| MIR3681HG | 0.376 | 0.6034 | <0.0001 |
| MCU       | 0.664 | 0.6034 | <0.0001 |
| CENPBD1P1 | 0.817 | 0.6034 | <0.0001 |
| PNMA1     | 0.884 | 0.6034 | <0.0001 |
| KCTD7     | 0.938 | 0.6034 | <0.0001 |

|            |       |        |         |
|------------|-------|--------|---------|
| PRKCA      | 0.871 | 0.6035 | <0.0001 |
| TLX1       | 0.895 | 0.6035 | <0.0001 |
| C1orf109   | 0.856 | 0.6036 | <0.0001 |
| ZNF165     | 0.771 | 0.6038 | <0.0001 |
| QSER1      | 0.906 | 0.6038 | <0.0001 |
| EMD        | 0.9   | 0.604  | <0.0001 |
| CSNK1G1    | 0.918 | 0.6047 | <0.0001 |
| HNRNPA3    | 0.933 | 0.6047 | <0.0001 |
| SUPT5H     | 0.883 | 0.6048 | <0.0001 |
| SSB        | 0.905 | 0.6048 | <0.0001 |
| HSPD1P6    | 0.647 | 0.6052 | 0.0214  |
| PFKFB4     | 0.871 | 0.6053 | <0.0001 |
| RNU7-75P   | 0.519 | 0.6055 | 0.0002  |
| HIST2H2AA3 | 0.948 | 0.6055 | 0.0091  |
| PIPSL      | 0.84  | 0.6056 | 0.0002  |
| ADAM10     | 0.908 | 0.6057 | <0.0001 |
| ZFAT       | 0.893 | 0.6058 | <0.0001 |
| PTGES2     | 0.9   | 0.606  | <0.0001 |
| MIR6129    | 0     | 0.6061 | <0.0001 |
| EIF3EP1    | 0.472 | 0.6064 | <0.0001 |
| DPM2       | 0.891 | 0.6065 | <0.0001 |
| VPS35      | 0.877 | 0.6066 | <0.0001 |
| CALR       | 0.904 | 0.6066 | <0.0001 |
| FZD6       | 0.824 | 0.6067 | <0.0001 |
| RACGAP1P   | 0.899 | 0.6069 | <0.0001 |
| SCGN       | 0.784 | 0.6071 | <0.0001 |
| KLC2       | 0.903 | 0.6072 | <0.0001 |
| EXOC6      | 0.87  | 0.6073 | <0.0001 |
| COPB2      | 0.886 | 0.6074 | <0.0001 |
| SFRP4      | 0.887 | 0.6074 | <0.0001 |
| NACC1      | 0.842 | 0.6075 | <0.0001 |
| SLC39A3    | 0.881 | 0.6075 | <0.0001 |
| DZIP3      | 0.895 | 0.6075 | <0.0001 |

|              |       |        |         |
|--------------|-------|--------|---------|
| NRCAM        | 0.767 | 0.608  | <0.0001 |
| NEMP1        | 0.536 | 0.6082 | 0.0057  |
| IGF2BP2-AS1  | 0.205 | 0.6082 | <0.0001 |
| DPM3         | 0.849 | 0.6082 | <0.0001 |
| FOXD2        | 0.915 | 0.6083 | <0.0001 |
| EIF2S2       | 0.869 | 0.6084 | <0.0001 |
| BAG6         | 0.883 | 0.6085 | <0.0001 |
| MTPN         | 0.912 | 0.6086 | <0.0001 |
| ZNF789       | 0.917 | 0.6086 | <0.0001 |
| MRPS16       | 0.89  | 0.6088 | <0.0001 |
| SFT2D2       | 0.87  | 0.609  | <0.0001 |
| PPP1R2       | 0.909 | 0.609  | <0.0001 |
| EIF3E        | 0.821 | 0.6092 | <0.0001 |
| BAZ1B        | 0.9   | 0.6098 | <0.0001 |
| LINC00266-4P | 0.795 | 0.6099 | 0.0194  |
| TOP1MT       | 0.838 | 0.6099 | <0.0001 |
| LMO7-AS1     | 0     | 0.61   | <0.0001 |
| ELOVL2-AS1   | 0.684 | 0.6103 | <0.0001 |
| GPD2         | 0.896 | 0.6104 | <0.0001 |
| FMO7P        | 0     | 0.6105 | <0.0001 |
| ZNF668       | 0.836 | 0.6105 | <0.0001 |
| MAPK3        | 0.91  | 0.6105 | <0.0001 |
| LINC01524    | 0     | 0.6108 | <0.0001 |
| ATP6V0E1     | 0.909 | 0.6108 | <0.0001 |
| RAB29        | 0.753 | 0.6111 | <0.0001 |
| MRPL55       | 0.855 | 0.6111 | <0.0001 |
| DDX46        | 0.889 | 0.6112 | <0.0001 |
| COA7         | 0.83  | 0.6114 | <0.0001 |
| CCT8         | 0.901 | 0.6115 | <0.0001 |
| GSK3A        | 0.914 | 0.6115 | <0.0001 |
| SRGAP2D      | 0.043 | 0.6116 | <0.0001 |
| RTN3P1       | 0.866 | 0.6118 | 0.0162  |
| HIST1H3C     | 0.911 | 0.6118 | <0.0001 |

|             |       |        |         |
|-------------|-------|--------|---------|
| RPSAP8      | 0.159 | 0.6119 | <0.0001 |
| TIMM9       | 0.917 | 0.6119 | <0.0001 |
| ZDHHC24     | 0.826 | 0.6123 | <0.0001 |
| AP3D1       | 0.908 | 0.6123 | <0.0001 |
| PON2        | 0.914 | 0.6124 | <0.0001 |
| RNA5SP70    | 0.321 | 0.6125 | <0.0001 |
| RNF181      | 0.868 | 0.6125 | <0.0001 |
| USP5        | 0.899 | 0.6126 | <0.0001 |
| ZNF543      | 0.872 | 0.6127 | <0.0001 |
| DPH6        | 0.916 | 0.6131 | 0.0017  |
| TEAD2       | 0.715 | 0.6131 | <0.0001 |
| SLC16A1-AS1 | 0.412 | 0.6132 | <0.0001 |
| PSMA7       | 0.896 | 0.6134 | <0.0001 |
| ZNF148      | 0.902 | 0.6134 | <0.0001 |
| UBL7-AS1    | 0.797 | 0.6137 | 0.0002  |
| LSM14A      | 0.884 | 0.6137 | <0.0001 |
| ATRIP       | 0.975 | 0.6139 | 0.009   |
| SYNJ2       | 0.857 | 0.6141 | <0.0001 |
| PTPN14      | 0.861 | 0.6141 | <0.0001 |
| GPR19       | 0.934 | 0.6143 | <0.0001 |
| TFG         | 0.89  | 0.6146 | <0.0001 |
| TIGD6       | 0.927 | 0.6146 | <0.0001 |
| C18orf54    | 0.893 | 0.6148 | <0.0001 |
| IRX3        | 0.695 | 0.615  | <0.0001 |
| EEF1A2      | 0.713 | 0.615  | <0.0001 |
| MAP3K9      | 0.925 | 0.615  | <0.0001 |
| PSMA1       | 0.942 | 0.615  | <0.0001 |
| COX20       | 0.963 | 0.6151 | 0.0185  |
| KIAA1211L   | 0.944 | 0.6152 | 0.0032  |
| PPIAP2      | 0.654 | 0.6152 | 0.0456  |
| RAB6B       | 0.883 | 0.6152 | <0.0001 |
| LOC284561   | 0     | 0.6153 | <0.0001 |
| SLC12A9     | 0.877 | 0.6154 | <0.0001 |

|            |       |        |         |
|------------|-------|--------|---------|
| RASD2      | 0.904 | 0.6154 | <0.0001 |
| C3orf33    | 0.676 | 0.6155 | <0.0001 |
| HARBI1     | 0.706 | 0.6155 | <0.0001 |
| FAM53C     | 0.681 | 0.6158 | <0.0001 |
| ANKRD16    | 0.888 | 0.6159 | <0.0001 |
| MIR1270    | 0     | 0.616  | <0.0001 |
| BPNT1      | 0.91  | 0.616  | <0.0001 |
| IQCD       | 0.89  | 0.6162 | <0.0001 |
| MRPL10     | 0.886 | 0.6163 | <0.0001 |
| UBA1       | 0.756 | 0.6166 | <0.0001 |
| TFPT       | 0.871 | 0.6169 | <0.0001 |
| PRRT3      | 0.86  | 0.6171 | <0.0001 |
| SNORD78    | 0.868 | 0.6175 | 0.0275  |
| EFCAB2     | 0.909 | 0.6175 | <0.0001 |
| THOC5      | 0.894 | 0.6176 | <0.0001 |
| ZNF555     | 0.813 | 0.6177 | <0.0001 |
| SMARCB1    | 0.825 | 0.6177 | <0.0001 |
| NPC2       | 0.908 | 0.6185 | <0.0001 |
| ATP6V0B    | 0.872 | 0.6186 | <0.0001 |
| FOXK2      | 0.932 | 0.6186 | <0.0001 |
| HNRNPAB    | 0.846 | 0.619  | <0.0001 |
| TAOK3      | 0.862 | 0.619  | <0.0001 |
| SART3      | 0.891 | 0.6193 | <0.0001 |
| MIF        | 0.939 | 0.6193 | <0.0001 |
| LINC01436  | 0.415 | 0.6194 | <0.0001 |
| RPL23AP3   | 0.296 | 0.6197 | <0.0001 |
| DLGAP1-AS1 | 0.597 | 0.6199 | <0.0001 |
| TPP1       | 0.857 | 0.62   | <0.0001 |
| HLA-F-AS1  | 0.689 | 0.6201 | <0.0001 |
| ANAPC4     | 0.893 | 0.6201 | <0.0001 |
| ESF1       | 0.882 | 0.6202 | <0.0001 |
| MRPS18A    | 0.823 | 0.6203 | <0.0001 |
| EHD4       | 0.92  | 0.6204 | <0.0001 |

|           |       |        |         |
|-----------|-------|--------|---------|
| TGS1      | 0.881 | 0.6206 | <0.0001 |
| SNX11     | 0.854 | 0.6207 | <0.0001 |
| BLOC1S3   | 0.922 | 0.6207 | <0.0001 |
| HSF1      | 0.842 | 0.6208 | <0.0001 |
| HNRNPLL   | 0.905 | 0.6209 | 0.0006  |
| MAP4K2    | 0.907 | 0.6209 | <0.0001 |
| MRPL45P2  | 0.88  | 0.621  | 0.0027  |
| PUSL1     | 0.792 | 0.621  | <0.0001 |
| SERPINH1  | 0.84  | 0.621  | <0.0001 |
| GNB1L     | 0.868 | 0.6213 | <0.0001 |
| NCL       | 0.921 | 0.6213 | <0.0001 |
| OSGEPL1   | 0.891 | 0.6215 | <0.0001 |
| PAIP1     | 0.905 | 0.6215 | <0.0001 |
| CEP128    | 0.722 | 0.6218 | <0.0001 |
| HIST1H4C  | 0.897 | 0.6218 | <0.0001 |
| TRAM1L1   | 0.721 | 0.6221 | <0.0001 |
| DPCD      | 0.817 | 0.6225 | <0.0001 |
| UTP15     | 0.84  | 0.6226 | <0.0001 |
| MED8      | 0.867 | 0.6226 | <0.0001 |
| PARS2     | 0.886 | 0.6227 | <0.0001 |
| CFAP36    | 0.402 | 0.6228 | <0.0001 |
| RECQL     | 0.904 | 0.6235 | <0.0001 |
| PRKAB2    | 0.922 | 0.6235 | <0.0001 |
| COL5A2    | 0.841 | 0.6236 | <0.0001 |
| THOC7     | 0.893 | 0.6236 | <0.0001 |
| SIX1      | 0.894 | 0.6236 | <0.0001 |
| IPO11     | 0.931 | 0.6237 | <0.0001 |
| NUDT3     | 0.947 | 0.6241 | <0.0001 |
| RPL39L    | 0.866 | 0.6242 | <0.0001 |
| PLEKHF2   | 0.883 | 0.6242 | <0.0001 |
| CTSV      | 0.899 | 0.6243 | 0.0002  |
| LINC00355 | 0.776 | 0.6243 | <0.0001 |
| HIST1H2AL | 0.914 | 0.6243 | <0.0001 |



|           |       |        |         |
|-----------|-------|--------|---------|
| MPHOSPH9  | 0.931 | 0.6244 | <0.0001 |
| FANCM     | 0.887 | 0.6245 | <0.0001 |
| GSK3B     | 0.911 | 0.6249 | <0.0001 |
| GMEB2     | 0.823 | 0.625  | <0.0001 |
| ERLEC1    | 0.881 | 0.6251 | <0.0001 |
| GAS5      | 0.928 | 0.6251 | <0.0001 |
| UHRF1BP1  | 0.822 | 0.6252 | <0.0001 |
| RNA5SP508 | 0.762 | 0.6255 | 0.0014  |
| LINC00847 | 0.567 | 0.6256 | <0.0001 |
| RRP12     | 0.855 | 0.6256 | <0.0001 |
| PXDNL     | 0.902 | 0.6256 | <0.0001 |
| DEAF1     | 0.879 | 0.6257 | <0.0001 |
| RPL23A    | 0.943 | 0.6257 | <0.0001 |
| FAP       | 0.878 | 0.6258 | <0.0001 |
| UBE2Q2L   | 0.873 | 0.626  | 0.0039  |
| PMS2P4    | 0.951 | 0.626  | 0.0051  |
| SSUH2     | 0.815 | 0.626  | <0.0001 |
| PXYLP1    | 0.081 | 0.6261 | <0.0001 |
| GDAP1     | 0.857 | 0.6263 | <0.0001 |
| ADRM1     | 0.915 | 0.6263 | <0.0001 |
| CNOT3     | 0.9   | 0.6265 | <0.0001 |
| RPS7P3    | 0.174 | 0.6268 | <0.0001 |
| GAPDHP14  | 0.235 | 0.627  | <0.0001 |
| STK36     | 0.948 | 0.627  | <0.0001 |
| METTL15P1 | 0.165 | 0.6271 | <0.0001 |
| CPNE3     | 0.847 | 0.6271 | <0.0001 |
| FKBPL     | 0.928 | 0.6275 | <0.0001 |
| METTL4    | 0.879 | 0.6277 | <0.0001 |
| RPUSD3    | 0.688 | 0.6278 | <0.0001 |
| FOXK1     | 0.879 | 0.6279 | <0.0001 |
| TCEA1     | 0.879 | 0.6279 | <0.0001 |
| LEO1      | 0.9   | 0.6279 | <0.0001 |
| SLC9A3R1  | 0.856 | 0.6282 | <0.0001 |

|           |       |        |         |
|-----------|-------|--------|---------|
| FLOT1     | 0.822 | 0.6283 | <0.0001 |
| ACTB      | 0.916 | 0.6285 | <0.0001 |
| ZEB2P1    | 0     | 0.6286 | <0.0001 |
| FOXP4-AS1 | 0.184 | 0.6287 | <0.0001 |
| SWT1      | 0.78  | 0.6289 | <0.0001 |
| FAF2      | 0.873 | 0.6289 | <0.0001 |
| DCAF16    | 0.826 | 0.629  | <0.0001 |
| POP1      | 0.815 | 0.6292 | <0.0001 |
| MDC1      | 0.885 | 0.6292 | <0.0001 |
| HIST1H1B  | 0.924 | 0.6295 | <0.0001 |
| P4HB      | 0.886 | 0.6297 | <0.0001 |
| RBBP4     | 0.903 | 0.6298 | <0.0001 |
| CRIP1     | 0.893 | 0.6301 | <0.0001 |
| SLC26A11  | 0.868 | 0.6303 | <0.0001 |
| RPL23AP82 | 0.879 | 0.6304 | 0.0009  |
| RNF43     | 0.793 | 0.6305 | <0.0001 |
| LINC01344 | 0.419 | 0.6307 | <0.0001 |
| COA4      | 0.803 | 0.6308 | <0.0001 |
| RPS7      | 0.878 | 0.6308 | <0.0001 |
| GATAD1    | 0.915 | 0.6309 | <0.0001 |
| MIR6859-2 | 0     | 0.6311 | <0.0001 |
| SLC41A1   | 0.789 | 0.6311 | <0.0001 |
| FTSJ1     | 0.897 | 0.6311 | <0.0001 |
| COX5BP6   | 0.171 | 0.6313 | <0.0001 |
| NUDT5     | 0.767 | 0.6313 | <0.0001 |
| TRPC7-AS1 | 0     | 0.6314 | <0.0001 |
| LSM12     | 0.903 | 0.6316 | <0.0001 |
| RNMT      | 0.914 | 0.6317 | <0.0001 |
| DPAGT1    | 0.859 | 0.632  | <0.0001 |
| MED19     | 0.788 | 0.6324 | <0.0001 |
| SP2       | 0.818 | 0.6326 | <0.0001 |
| CAPZA2    | 0.92  | 0.6326 | <0.0001 |
| RPL7AP11  | 0.643 | 0.6328 | 0.045   |

|          |       |        |         |
|----------|-------|--------|---------|
| PTDSS1   | 0.749 | 0.6328 | <0.0001 |
| ZCCHC9   | 0.772 | 0.6328 | <0.0001 |
| KMT5C    | 0     | 0.6329 | <0.0001 |
| GK5      | 0.888 | 0.6329 | <0.0001 |
| ARHGAP19 | 0.902 | 0.6332 | <0.0001 |
| TRIM65   | 0.815 | 0.6334 | <0.0001 |
| YEATS4   | 0.897 | 0.6334 | <0.0001 |
| PIP5K1A  | 0.912 | 0.6336 | <0.0001 |
| VANGL1   | 0.778 | 0.6337 | <0.0001 |
| TERF1    | 0.929 | 0.6337 | <0.0001 |
| EXO5     | 0.891 | 0.6338 | <0.0001 |
| HOXA10   | 0.807 | 0.634  | <0.0001 |
| SNX16    | 0.853 | 0.634  | <0.0001 |
| TERT     | 0.86  | 0.634  | <0.0001 |
| RPL36A   | 0.953 | 0.6341 | 0.0002  |
| MKKS     | 0.855 | 0.6341 | <0.0001 |
| ZNF740   | 0.887 | 0.6341 | <0.0001 |
| PSPHP1   | 0.615 | 0.6342 | 0.0158  |
| ADAM9    | 0.877 | 0.6342 | <0.0001 |
| VWFP1    | 0.41  | 0.6343 | <0.0001 |
| EPS15L1  | 0.801 | 0.6348 | <0.0001 |
| MTMR11   | 0.828 | 0.635  | <0.0001 |
| POLD3    | 0.882 | 0.635  | <0.0001 |
| TMEM98   | 0.81  | 0.6352 | <0.0001 |
| METTL6   | 0.845 | 0.6352 | <0.0001 |
| GPATCH8  | 0.899 | 0.6352 | <0.0001 |
| EFCAB11  | 0.903 | 0.6353 | <0.0001 |
| CWF19L1  | 0.842 | 0.6355 | <0.0001 |
| MRS2     | 0.785 | 0.6357 | <0.0001 |
| ZNF92    | 0.896 | 0.6359 | <0.0001 |
| C19orf53 | 0.887 | 0.636  | <0.0001 |
| CCDC142  | 0.915 | 0.636  | <0.0001 |
| BAP1     | 0.925 | 0.636  | <0.0001 |

|           |       |        |         |
|-----------|-------|--------|---------|
| JARID2    | 0.88  | 0.6362 | <0.0001 |
| JAG2      | 0.891 | 0.6362 | <0.0001 |
| MECOM     | 0.802 | 0.6368 | <0.0001 |
| SPIN4     | 0.75  | 0.6372 | <0.0001 |
| GTF2H2    | 0.888 | 0.6373 | <0.0001 |
| HIST1H2AH | 0.857 | 0.6377 | <0.0001 |
| BLZF1     | 0.948 | 0.6382 | <0.0001 |
| PLP2      | 0.791 | 0.6383 | <0.0001 |
| MNAT1     | 0.863 | 0.6384 | <0.0001 |
| NOP56     | 0.871 | 0.6384 | <0.0001 |
| RCC1      | 0.853 | 0.6385 | <0.0001 |
| NAE1      | 0.854 | 0.6385 | <0.0001 |
| HAUS5     | 0.822 | 0.6388 | <0.0001 |
| STOML1    | 0.841 | 0.6388 | <0.0001 |
| ACTR1A    | 0.869 | 0.6389 | <0.0001 |
| NDUFAF8   | 0     | 0.639  | <0.0001 |
| TFCP2     | 0.809 | 0.6392 | <0.0001 |
| RPL19     | 0.9   | 0.6392 | <0.0001 |
| MFSD6     | 0.831 | 0.6393 | <0.0001 |
| ADA       | 0.843 | 0.6394 | <0.0001 |
| TPM3P6    | 0.126 | 0.6396 | <0.0001 |
| RPL23     | 0.926 | 0.6396 | <0.0001 |
| C15orf39  | 0.898 | 0.6402 | <0.0001 |
| CTNNB1    | 0.9   | 0.6402 | <0.0001 |
| TMC7      | 0.917 | 0.6403 | <0.0001 |
| MMS19     | 0.865 | 0.6404 | <0.0001 |
| FGF12-AS3 | 0.492 | 0.6407 | <0.0001 |
| ANKRD52   | 0.912 | 0.6407 | <0.0001 |
| CDYL      | 0.904 | 0.6408 | <0.0001 |
| HDAC2     | 0.908 | 0.6414 | <0.0001 |
| SOX4      | 0.84  | 0.6416 | <0.0001 |
| ALDH3A1   | 0.84  | 0.6418 | <0.0001 |
| LINC01235 | 0.602 | 0.6419 | 0.0168  |

|             |       |        |         |
|-------------|-------|--------|---------|
| CLDN15      | 0.862 | 0.6419 | <0.0001 |
| NOL12       | 0.959 | 0.6419 | <0.0001 |
| LOX         | 0.796 | 0.642  | <0.0001 |
| HIST1H2BE   | 0.861 | 0.642  | <0.0001 |
| MIB1        | 0.914 | 0.642  | <0.0001 |
| PIEZO2      | 0.727 | 0.6424 | <0.0001 |
| NSFL1C      | 0.887 | 0.6427 | <0.0001 |
| GRB2        | 0.899 | 0.6432 | <0.0001 |
| TDP2        | 0.687 | 0.6433 | <0.0001 |
| SAMD1       | 0.884 | 0.6433 | <0.0001 |
| MICALL1     | 0.816 | 0.6434 | <0.0001 |
| H3F3A       | 0.96  | 0.6435 | 0.0003  |
| SP5         | 0.794 | 0.6435 | <0.0001 |
| MGC27345    | 0.807 | 0.6435 | <0.0001 |
| CPNE1       | 0.879 | 0.6435 | <0.0001 |
| PSENE1      | 0.825 | 0.6439 | <0.0001 |
| DCTN1       | 0.872 | 0.6439 | <0.0001 |
| RNU6ATAC32P | 0.232 | 0.644  | <0.0001 |
| BECN1       | 0.862 | 0.644  | <0.0001 |
| STK3        | 0.809 | 0.6444 | <0.0001 |
| DPP3        | 0.888 | 0.6445 | <0.0001 |
| COX6CP2     | 0     | 0.6448 | <0.0001 |
| TCEANC2     | 0.736 | 0.6448 | <0.0001 |
| PSMC5       | 0.857 | 0.645  | <0.0001 |
| IFT27       | 0.813 | 0.6452 | <0.0001 |
| DBNDD1      | 0.899 | 0.6454 | <0.0001 |
| NDUFS8      | 0.768 | 0.6458 | <0.0001 |
| HIST1H2BK   | 0.872 | 0.6458 | <0.0001 |
| VPS33B      | 0.873 | 0.6458 | <0.0001 |
| ZP3         | 0.881 | 0.6459 | <0.0001 |
| TTC9C       | 0.914 | 0.6465 | <0.0001 |
| AADACL2-AS1 | 0     | 0.6466 | <0.0001 |
| PLA2G4E-AS1 | 0.009 | 0.6466 | <0.0001 |

|           |       |        |         |
|-----------|-------|--------|---------|
| CRELD2    | 0.872 | 0.6466 | <0.0001 |
| EFNA3     | 0.892 | 0.6466 | <0.0001 |
| ZFPL1     | 0.956 | 0.6467 | <0.0001 |
| NSUN5P1   | 0.973 | 0.6469 | 0.0249  |
| ZSCAN21   | 0.844 | 0.6469 | <0.0001 |
| CASC20    | 0.373 | 0.6472 | <0.0001 |
| ZNF416    | 0.865 | 0.6474 | <0.0001 |
| LOC389834 | 0.677 | 0.6475 | <0.0001 |
| SLC25A14  | 0.886 | 0.6476 | <0.0001 |
| SNX8      | 0.924 | 0.6477 | <0.0001 |
| SOX12     | 0.864 | 0.6478 | <0.0001 |
| SMPX      | 0.799 | 0.648  | <0.0001 |
| ZNF672    | 0.82  | 0.648  | <0.0001 |
| AIMP2     | 0.906 | 0.6481 | <0.0001 |
| HSDL1     | 0.794 | 0.6482 | <0.0001 |
| MIR3143   | 0.772 | 0.6484 | 0.0192  |
| C2orf68   | 0.807 | 0.6487 | <0.0001 |
| SLC29A1   | 0.894 | 0.6488 | <0.0001 |
| KATNB1    | 0.882 | 0.6489 | <0.0001 |
| HMGA1P1   | 0     | 0.649  | <0.0001 |
| STRIP1    | 0.864 | 0.649  | <0.0001 |
| FABP5P7   | 0     | 0.6495 | <0.0001 |
| G6PC3     | 0.817 | 0.6495 | <0.0001 |
| MED1      | 0.89  | 0.6496 | <0.0001 |
| ZNF217    | 0.902 | 0.6497 | <0.0001 |
| RNF144A   | 0.838 | 0.65   | <0.0001 |
| PACSIN2   | 0.809 | 0.6502 | <0.0001 |
| FABP5P1   | 0.634 | 0.6506 | 0.0018  |
| CLPTM1    | 0.827 | 0.6506 | <0.0001 |
| PCNX2     | 0.259 | 0.6507 | <0.0001 |
| POLR2D    | 0.847 | 0.6507 | <0.0001 |
| DNTTIP1   | 0.848 | 0.6507 | <0.0001 |
| MSX1      | 0.885 | 0.6507 | <0.0001 |

|            |       |        |         |
|------------|-------|--------|---------|
| ZNF730     | 0.558 | 0.6512 | <0.0001 |
| SMS        | 0.915 | 0.6516 | <0.0001 |
| TSTA3      | 0.808 | 0.6518 | <0.0001 |
| CCDC112    | 0.84  | 0.6518 | <0.0001 |
| VPS52      | 0.858 | 0.6518 | <0.0001 |
| CEP85      | 0.882 | 0.652  | <0.0001 |
| DDX59      | 0.899 | 0.652  | <0.0001 |
| KPNA4      | 0.909 | 0.652  | <0.0001 |
| ZNF184     | 0.839 | 0.6521 | <0.0001 |
| C11orf80   | 0.822 | 0.6524 | <0.0001 |
| SLC39A6    | 0.898 | 0.6526 | <0.0001 |
| FASTKD3    | 0.908 | 0.6527 | <0.0001 |
| DERL1      | 0.855 | 0.6528 | <0.0001 |
| MAGEC2     | 0.72  | 0.6529 | <0.0001 |
| ALOX12-AS1 | 0.708 | 0.6533 | 0.0262  |
| RIT1       | 0.831 | 0.6535 | <0.0001 |
| SPIRE2     | 0.745 | 0.6536 | <0.0001 |
| KIF22      | 0.958 | 0.6538 | <0.0001 |
| UPF3AP2    | 0     | 0.654  | <0.0001 |
| RASL12     | 0.898 | 0.654  | <0.0001 |
| DRC7       | 0.686 | 0.6542 | 0.0027  |
| HNRNPR     | 0.844 | 0.6544 | <0.0001 |
| ASAP1      | 0.783 | 0.6548 | <0.0001 |
| PPHLN1     | 0.867 | 0.6551 | <0.0001 |
| KIN        | 0.887 | 0.6551 | <0.0001 |
| BUD13      | 0.874 | 0.6552 | <0.0001 |
| NLK        | 0.908 | 0.6553 | <0.0001 |
| QSOX2      | 0.886 | 0.6555 | <0.0001 |
| TMUB2      | 0.918 | 0.6557 | <0.0001 |
| RPL12P33   | 0     | 0.6558 | <0.0001 |
| MTR        | 0.899 | 0.6558 | <0.0001 |
| VPS16      | 0.857 | 0.6559 | <0.0001 |
| RAB13      | 0.851 | 0.6564 | <0.0001 |

|           |       |        |         |
|-----------|-------|--------|---------|
| CYB561A3  | 0.712 | 0.6567 | <0.0001 |
| VWF       | 0.892 | 0.6567 | <0.0001 |
| VCP       | 0.79  | 0.657  | <0.0001 |
| DYDC2     | 0.866 | 0.657  | <0.0001 |
| CHD8      | 0.888 | 0.6572 | <0.0001 |
| MPP6      | 0.778 | 0.6574 | <0.0001 |
| FOXD2-AS1 | 0.78  | 0.6575 | <0.0001 |
| TBCD      | 0.87  | 0.6576 | <0.0001 |
| NME6      | 0.904 | 0.6576 | <0.0001 |
| ZBED4     | 0.872 | 0.6577 | <0.0001 |
| MPV17L2   | 0.698 | 0.6578 | <0.0001 |
| FOCAD-AS1 | 0     | 0.6579 | <0.0001 |
| DHX37     | 0.82  | 0.658  | <0.0001 |
| DDX55     | 0.9   | 0.658  | <0.0001 |
| CDC27     | 0.906 | 0.6581 | <0.0001 |
| BAIAP2L2  | 0.784 | 0.6582 | <0.0001 |
| SPRYD3    | 0.681 | 0.6583 | <0.0001 |
| PAPSS1    | 0.89  | 0.6586 | <0.0001 |
| DGCR2     | 0.858 | 0.6588 | <0.0001 |
| ATF6B     | 0.888 | 0.6591 | <0.0001 |
| GBP2      | 0.882 | 0.6592 | <0.0001 |
| IQCE      | 0.821 | 0.6596 | <0.0001 |
| ARPC3     | 0.876 | 0.6597 | <0.0001 |
| LINC01124 | 0.69  | 0.6598 | 0.0018  |
| RTCA      | 0.783 | 0.6598 | <0.0001 |
| UNG       | 0.86  | 0.6599 | <0.0001 |
| MOSPD1    | 0.878 | 0.66   | <0.0001 |
| XRCC2     | 0.961 | 0.6603 | <0.0001 |
| DYRK2     | 0.875 | 0.6604 | <0.0001 |
| SLC22A5   | 0.919 | 0.6604 | <0.0001 |
| SSR3      | 0.865 | 0.6606 | <0.0001 |
| ZNF746    | 0.852 | 0.6607 | <0.0001 |
| RPS20     | 0.9   | 0.6607 | <0.0001 |



|           |       |        |         |
|-----------|-------|--------|---------|
| PALB2     | 0.846 | 0.6608 | <0.0001 |
| PIGX      | 0.878 | 0.6608 | <0.0001 |
| WRNIP1    | 0.897 | 0.6608 | <0.0001 |
| NCOA5     | 0.825 | 0.6612 | <0.0001 |
| NCOA2     | 0.88  | 0.6612 | <0.0001 |
| SOCS5     | 0.929 | 0.6614 | <0.0001 |
| OR11Q1P   | 0     | 0.6616 | <0.0001 |
| RCC2      | 0.855 | 0.6616 | <0.0001 |
| ARPC1B    | 0.803 | 0.6618 | <0.0001 |
| ELAVL1    | 0.905 | 0.6618 | <0.0001 |
| DYNC1H1   | 0.497 | 0.662  | <0.0001 |
| GTF2I     | 0.918 | 0.6621 | <0.0001 |
| PURB      | 0.856 | 0.6625 | <0.0001 |
| SLC35A4   | 0.832 | 0.6627 | <0.0001 |
| TRAF5     | 0.866 | 0.6627 | <0.0001 |
| SPATA2    | 0.834 | 0.6633 | <0.0001 |
| DLG5-AS1  | 0.968 | 0.6634 | 0.0481  |
| CCDC88A   | 0.75  | 0.6634 | <0.0001 |
| HAT1      | 0.922 | 0.6634 | <0.0001 |
| PLAU      | 0.87  | 0.6635 | <0.0001 |
| LINC00328 | 0.647 | 0.6637 | <0.0001 |
| PJA1      | 0.865 | 0.6638 | <0.0001 |
| DHRS13    | 0.823 | 0.664  | <0.0001 |
| PDGFA     | 0.87  | 0.6643 | <0.0001 |
| RFC2      | 0.911 | 0.6643 | <0.0001 |
| GNL2      | 0.882 | 0.6644 | <0.0001 |
| PPP1R14B  | 0.795 | 0.6645 | <0.0001 |
| FAM86C1   | 0.8   | 0.6645 | <0.0001 |
| RPSAP69   | 0.066 | 0.6647 | <0.0001 |
| ENOX2     | 0.904 | 0.6649 | <0.0001 |
| EED       | 0.917 | 0.6652 | <0.0001 |
| ARPIN     | 0.813 | 0.6654 | <0.0001 |
| PDGFB     | 0.94  | 0.6655 | <0.0001 |

|           |       |        |         |
|-----------|-------|--------|---------|
| RBM22     | 0.758 | 0.6656 | <0.0001 |
| HPS3      | 0.951 | 0.6657 | <0.0001 |
| DUSP18    | 0.922 | 0.6658 | <0.0001 |
| NPM1P9    | 0     | 0.6659 | <0.0001 |
| FKBP9     | 0.884 | 0.6661 | <0.0001 |
| TTC26     | 0.747 | 0.6662 | <0.0001 |
| ERCC3     | 0.922 | 0.6665 | <0.0001 |
| TMEM132A  | 0.864 | 0.6666 | <0.0001 |
| DBN1      | 0.885 | 0.6666 | <0.0001 |
| UTP23     | 0.823 | 0.6667 | <0.0001 |
| ANKRD29   | 0.896 | 0.6667 | <0.0001 |
| ATP8B1    | 0.909 | 0.6667 | <0.0001 |
| RNF115    | 0.809 | 0.6669 | <0.0001 |
| C5orf30   | 0.738 | 0.6671 | <0.0001 |
| ATP6V0A1  | 0.841 | 0.6671 | <0.0001 |
| YWHAQ     | 0.895 | 0.6671 | <0.0001 |
| SKA2      | 0.901 | 0.6671 | <0.0001 |
| HDGF      | 0.757 | 0.6676 | <0.0001 |
| DDX12P    | 0.758 | 0.6678 | 0.007   |
| TPD52     | 0.884 | 0.6679 | <0.0001 |
| LINC01116 | 0.859 | 0.6681 | 0.0002  |
| ATP1A1    | 0.887 | 0.6681 | <0.0001 |
| TLK2P1    | 0.098 | 0.6682 | <0.0001 |
| RNA5SP82  | 0.115 | 0.6684 | <0.0001 |
| RPL27AP   | 0.295 | 0.6685 | <0.0001 |
| THUMPD3   | 0.913 | 0.6689 | <0.0001 |
| ARIH2     | 0.87  | 0.6691 | <0.0001 |
| FTH1P3    | 0.932 | 0.6693 | 0.0312  |
| B4GALT7   | 0.794 | 0.6693 | <0.0001 |
| C7orf77   | 0     | 0.6694 | <0.0001 |
| SLC6A8    | 0.741 | 0.6694 | <0.0001 |
| RNPEP     | 0.83  | 0.6697 | <0.0001 |
| MAPKAPK2  | 0.857 | 0.6697 | <0.0001 |

|          |       |        |         |
|----------|-------|--------|---------|
| GAPDHP70 | 0.395 | 0.6698 | <0.0001 |
| MAP2K2   | 0.824 | 0.6705 | <0.0001 |
| MITD1    | 0.761 | 0.6706 | <0.0001 |
| EXOC4    | 0.938 | 0.6708 | <0.0001 |
| KIAA1841 | 0.936 | 0.671  | <0.0001 |
| XK       | 0.819 | 0.6713 | <0.0001 |
| FAIM     | 0.915 | 0.6713 | <0.0001 |
| DENR     | 0.92  | 0.6715 | <0.0001 |
| RPS11P5  | 0.548 | 0.6718 | <0.0001 |
| PTPRG    | 0.844 | 0.6718 | <0.0001 |
| TIGD1    | 0.913 | 0.6718 | <0.0001 |
| RIBC2    | 0.865 | 0.6719 | <0.0001 |
| CAMLG    | 0.847 | 0.6721 | <0.0001 |
| CBR3     | 0.863 | 0.6723 | <0.0001 |
| ROMO1    | 0.915 | 0.6723 | <0.0001 |
| LDLRAD1  | 0.839 | 0.6725 | <0.0001 |
| PSMB2    | 0.875 | 0.6725 | <0.0001 |
| GLMN     | 0.873 | 0.6731 | <0.0001 |
| CBR3-AS1 | 0.807 | 0.6733 | <0.0001 |
| MRPS10   | 0.847 | 0.6735 | <0.0001 |
| SRD5A3   | 0.866 | 0.6735 | <0.0001 |
| RCOR3    | 0.919 | 0.6735 | <0.0001 |
| KPNA7    | 0.838 | 0.6736 | <0.0001 |
| TCF20    | 0.919 | 0.6736 | <0.0001 |
| TATDN2   | 0.935 | 0.6736 | <0.0001 |
| DDX20    | 0.845 | 0.6738 | <0.0001 |
| PRKCI    | 0.864 | 0.674  | <0.0001 |
| GGCT     | 0.806 | 0.6741 | <0.0001 |
| JRK      | 0.921 | 0.6744 | <0.0001 |
| ACD      | 0.845 | 0.6745 | <0.0001 |
| TRIM16L  | 0.878 | 0.6749 | <0.0001 |
| CUL9     | 0.753 | 0.6751 | <0.0001 |
| BRI3BP   | 0.864 | 0.6751 | <0.0001 |

|          |       |        |         |
|----------|-------|--------|---------|
| ALDOA    | 0.874 | 0.6753 | <0.0001 |
| PSMD3    | 0.833 | 0.6756 | <0.0001 |
| COX11    | 0.861 | 0.6756 | <0.0001 |
| TINAG    | 0.488 | 0.6758 | <0.0001 |
| PDCL     | 0.913 | 0.6758 | <0.0001 |
| RAI14    | 0.886 | 0.6759 | <0.0001 |
| SLC1A3   | 0.852 | 0.6761 | <0.0001 |
| HIST2H4A | 0.884 | 0.6763 | 0.0002  |
| TJAP1    | 0.918 | 0.6763 | <0.0001 |
| YWHAB    | 0.913 | 0.6764 | <0.0001 |
| PBXIP1   | 0.886 | 0.677  | <0.0001 |
| UHMK1    | 0.905 | 0.6773 | <0.0001 |
| MTIF2    | 0.927 | 0.6776 | <0.0001 |
| NECTIN1  | 0.353 | 0.6777 | <0.0001 |
| CHEK2    | 0.868 | 0.6778 | <0.0001 |
| TBC1D13  | 0.848 | 0.678  | <0.0001 |
| NAP1L1   | 0.913 | 0.678  | <0.0001 |
| RPSAP54  | 0     | 0.6781 | <0.0001 |
| GALNT11  | 0.886 | 0.6781 | <0.0001 |
| HARS     | 0.832 | 0.6783 | <0.0001 |
| MKRN1    | 0.905 | 0.6784 | <0.0001 |
| RBCK1    | 0.939 | 0.6784 | <0.0001 |
| LAMTOR2  | 0.835 | 0.6785 | <0.0001 |
| LYSMD4   | 0.876 | 0.6785 | <0.0001 |
| SYPL1    | 0.906 | 0.6785 | <0.0001 |
| TMEM14B  | 0.896 | 0.6792 | <0.0001 |
| PTTG3P   | 0.908 | 0.6796 | <0.0001 |
| GPKOW    | 0.921 | 0.6798 | <0.0001 |
| PGC      | 0.8   | 0.68   | <0.0001 |
| TIMM29   | 0     | 0.6802 | <0.0001 |
| RBM15B   | 0.882 | 0.6802 | <0.0001 |
| MAPKAP1  | 0.897 | 0.6803 | <0.0001 |
| IL3RA    | 0.952 | 0.6806 | <0.0001 |

|              |       |        |         |
|--------------|-------|--------|---------|
| TAF1A-AS1    | 0.478 | 0.6808 | <0.0001 |
| SLC25A5P5    | 0     | 0.6809 | <0.0001 |
| COPE         | 0.856 | 0.6809 | <0.0001 |
| MIF4GD       | 0.906 | 0.6809 | <0.0001 |
| LSM8         | 0.863 | 0.6811 | <0.0001 |
| CLCN7        | 0.894 | 0.6813 | <0.0001 |
| ZNF57        | 0.804 | 0.6814 | <0.0001 |
| GGNBP2       | 0.85  | 0.6814 | <0.0001 |
| ACOT8        | 0.873 | 0.6815 | <0.0001 |
| PLEKHA8      | 0.869 | 0.6818 | <0.0001 |
| MRPS12       | 0.874 | 0.682  | <0.0001 |
| PHF20L1      | 0.875 | 0.6821 | <0.0001 |
| MAPK6        | 0.906 | 0.6821 | <0.0001 |
| SAP30L       | 0.903 | 0.6823 | <0.0001 |
| LOC101928565 | 0     | 0.6824 | <0.0001 |
| PGBD1        | 0.816 | 0.6824 | <0.0001 |
| IKBIP        | 0.816 | 0.683  | <0.0001 |
| ZNRD1        | 0.917 | 0.683  | <0.0001 |
| GREB1L       | 0.815 | 0.6833 | <0.0001 |
| GAPDHP59     | 0.36  | 0.6834 | <0.0001 |
| LOC100287896 | 0.855 | 0.6834 | <0.0001 |
| FOXRED2      | 0.909 | 0.6836 | <0.0001 |
| RPL7P48      | 0     | 0.6838 | <0.0001 |
| COMMD7       | 0.87  | 0.6838 | <0.0001 |
| PRRT3-AS1    | 0.72  | 0.684  | <0.0001 |
| BRPF3        | 0.871 | 0.684  | <0.0001 |
| CSPG5        | 0.921 | 0.6841 | <0.0001 |
| PTGES3P3     | 0.907 | 0.6843 | 0.0228  |
| MIR4500      | 0.223 | 0.6844 | <0.0001 |
| ERH          | 0.889 | 0.6844 | <0.0001 |
| CD3EAP       | 0.855 | 0.6845 | <0.0001 |
| CEP68        | 0.906 | 0.6847 | <0.0001 |
| PKN1         | 0.902 | 0.6848 | <0.0001 |

|            |       |        |         |
|------------|-------|--------|---------|
| PDZK1P1    | 0.85  | 0.6853 | 0.0009  |
| ITGA5      | 0.841 | 0.6853 | <0.0001 |
| UNC13B     | 0.896 | 0.6854 | <0.0001 |
| ERGIC3     | 0.913 | 0.6856 | <0.0001 |
| RNASEH1    | 0.852 | 0.6857 | <0.0001 |
| CHD7       | 0.851 | 0.6858 | <0.0001 |
| PAGE4      | 0.832 | 0.6863 | <0.0001 |
| SSX1       | 0.7   | 0.6866 | <0.0001 |
| BACE1-AS   | 0.567 | 0.6867 | 0.0016  |
| ZNF649-AS1 | 0.282 | 0.6867 | <0.0001 |
| TMEM136    | 0.837 | 0.6867 | <0.0001 |
| SLC17A5    | 0.841 | 0.6869 | <0.0001 |
| MKRN3      | 0.902 | 0.6869 | <0.0001 |
| SLC44A5    | 0.655 | 0.687  | <0.0001 |
| HMGXB4     | 0.893 | 0.687  | <0.0001 |
| UTP14A     | 0.925 | 0.6872 | <0.0001 |
| SLC25A15P3 | 0     | 0.6874 | <0.0001 |
| TMEM97     | 0.842 | 0.6874 | <0.0001 |
| CHD4       | 0.866 | 0.6874 | <0.0001 |
| LRRC57     | 0.89  | 0.6874 | <0.0001 |
| C15orf61   | 0.699 | 0.6876 | <0.0001 |
| CNP        | 0.891 | 0.6877 | <0.0001 |
| FKBP11     | 0.784 | 0.6878 | <0.0001 |
| SRPK2      | 0.916 | 0.6879 | <0.0001 |
| PRKAG1     | 0.879 | 0.6882 | <0.0001 |
| OCRL       | 0.929 | 0.6884 | <0.0001 |
| NIPA2      | 0.894 | 0.6886 | <0.0001 |
| GIPC1      | 0.853 | 0.6887 | <0.0001 |
| EXOC2      | 0.906 | 0.6887 | <0.0001 |
| CHMP2A     | 0.917 | 0.6887 | <0.0001 |
| PPAT       | 0.845 | 0.6888 | <0.0001 |
| PRMT5      | 0.887 | 0.6895 | <0.0001 |
| BCL2L12    | 0.919 | 0.6895 | <0.0001 |

|              |       |        |         |
|--------------|-------|--------|---------|
| CCT6P1       | 0.945 | 0.6899 | 0.0041  |
| RN7SL5P      | 0     | 0.6899 | <0.0001 |
| IGF2BP2      | 0.856 | 0.6907 | <0.0001 |
| TXNL4A       | 0.792 | 0.691  | <0.0001 |
| EIF2S3       | 0.894 | 0.6912 | <0.0001 |
| HMGN1        | 0.941 | 0.6913 | <0.0001 |
| SSNA1        | 0.882 | 0.6914 | <0.0001 |
| PIK3CD-AS2   | 0     | 0.6915 | <0.0001 |
| ITPA         | 0.842 | 0.6915 | <0.0001 |
| PPP1R11      | 0.935 | 0.6915 | <0.0001 |
| SYNGR2       | 0.805 | 0.6918 | <0.0001 |
| SMPD2        | 0.827 | 0.6918 | <0.0001 |
| RMND5B       | 0.85  | 0.6918 | <0.0001 |
| ASB16-AS1    | 0.479 | 0.692  | <0.0001 |
| TTI1         | 0.803 | 0.692  | <0.0001 |
| XXYLT1       | 0.936 | 0.6923 | 0.0003  |
| KDELR1       | 0.891 | 0.6923 | <0.0001 |
| SCML2        | 0.924 | 0.6924 | <0.0001 |
| GIT1         | 0.921 | 0.6925 | <0.0001 |
| DNMT3A       | 0.919 | 0.6926 | <0.0001 |
| RPRD1A       | 0.829 | 0.6927 | <0.0001 |
| MYO1A        | 0.839 | 0.6927 | <0.0001 |
| RNF216       | 0.881 | 0.6927 | <0.0001 |
| ZNF30        | 0.91  | 0.6929 | <0.0001 |
| SLC25A19     | 0.823 | 0.6931 | <0.0001 |
| WNK4         | 0.715 | 0.6933 | <0.0001 |
| RASAL2       | 0.882 | 0.6933 | <0.0001 |
| GON4L        | 0.909 | 0.6936 | <0.0001 |
| LOC100288570 | 0     | 0.6944 | <0.0001 |
| ACP6         | 0.811 | 0.6944 | <0.0001 |
| LINC01446    | 0.735 | 0.6948 | 0.002   |
| STPG1        | 0.879 | 0.6949 | <0.0001 |
| RAB22A       | 0.917 | 0.6949 | <0.0001 |

|                 |       |        |         |
|-----------------|-------|--------|---------|
| MEX3A           | 0.908 | 0.6955 | <0.0001 |
| SAMD4B          | 0.899 | 0.6957 | <0.0001 |
| TMEM189         | 0.852 | 0.6958 | <0.0001 |
| PTBP3           | 0.823 | 0.6959 | <0.0001 |
| DCAF4L2         | 0.326 | 0.6963 | <0.0001 |
| HS1BP3          | 0.861 | 0.6963 | <0.0001 |
| ZNF766          | 0.884 | 0.6963 | <0.0001 |
| HHAT            | 0.819 | 0.6964 | <0.0001 |
| TMEM50A         | 0.925 | 0.6965 | <0.0001 |
| TTC5            | 0.728 | 0.6966 | <0.0001 |
| ADCY6           | 0.928 | 0.6971 | <0.0001 |
| ATP6V1G2-DDX39B | 0     | 0.6972 | 0.002   |
| BRCA2           | 0.854 | 0.6973 | <0.0001 |
| SLC2A5          | 0.819 | 0.6975 | <0.0001 |
| TMEM14A         | 0.768 | 0.6978 | <0.0001 |
| AAGAB           | 0.853 | 0.6978 | <0.0001 |
| GNB5            | 0.86  | 0.6983 | <0.0001 |
| SPOCK1          | 0.784 | 0.6984 | <0.0001 |
| ZMYM1           | 0.922 | 0.6984 | <0.0001 |
| PAK1IP1         | 0.855 | 0.6987 | <0.0001 |
| SERF1B          | 0.873 | 0.6989 | <0.0001 |
| PIK3R2          | 0.97  | 0.6989 | <0.0001 |
| SLC7A6          | 0.859 | 0.699  | <0.0001 |
| ZNF605          | 0.935 | 0.6992 | <0.0001 |
| NDUFAF6         | 0.545 | 0.6993 | <0.0001 |
| MIR4659A        | 0     | 0.6995 | <0.0001 |
| HNRNPA1P8       | 0.883 | 0.6996 | 0.0098  |
| DCTN4           | 0.891 | 0.6996 | <0.0001 |
| DHX16           | 0.899 | 0.6997 | <0.0001 |
| HIST2H2AA4      | 0.803 | 0.7005 | <0.0001 |
| LINC01353       | 0.168 | 0.7007 | <0.0001 |
| SPINK5          | 0.825 | 0.7007 | <0.0001 |
| SPP1            | 0.764 | 0.7008 | <0.0001 |



|           |       |        |         |
|-----------|-------|--------|---------|
| PKN3      | 0.828 | 0.7009 | <0.0001 |
| COPS7B    | 0.916 | 0.7018 | <0.0001 |
| MMP9      | 0.85  | 0.7019 | <0.0001 |
| GRN       | 0.931 | 0.7021 | <0.0001 |
| TUSC2     | 0.842 | 0.7024 | <0.0001 |
| PRELID1   | 0.858 | 0.7026 | <0.0001 |
| UPF3B     | 0.923 | 0.7027 | <0.0001 |
| GNB1      | 0.869 | 0.7029 | <0.0001 |
| DTD1      | 0.847 | 0.7031 | <0.0001 |
| ZDHHC12   | 0.806 | 0.7032 | <0.0001 |
| DBF4B     | 0.922 | 0.7032 | <0.0001 |
| MROH1     | 0.324 | 0.7034 | <0.0001 |
| LINC01138 | 0.807 | 0.7035 | <0.0001 |
| LSM11     | 0.933 | 0.7035 | <0.0001 |
| SAPCD2    | 0.959 | 0.7038 | 0.008   |
| RRP1B     | 0.825 | 0.704  | <0.0001 |
| KIF3B     | 0.907 | 0.7041 | <0.0001 |
| PTGES3P4  | 0.043 | 0.7042 | <0.0001 |
| GOLGA2P10 | 0.684 | 0.7043 | 0.0139  |
| SHKBP1    | 0.842 | 0.7044 | <0.0001 |
| FTH1P5    | 0.945 | 0.7047 | 0.0034  |
| IRF2BP2   | 0.868 | 0.7047 | <0.0001 |
| RBM45     | 0.809 | 0.7048 | <0.0001 |
| MAP2      | 0.878 | 0.7048 | <0.0001 |
| C6orf47   | 0.913 | 0.7049 | <0.0001 |
| RPS10     | 0.949 | 0.7049 | <0.0001 |
| EHD4-AS1  | 0.027 | 0.705  | <0.0001 |
| PEX2      | 0.881 | 0.7051 | <0.0001 |
| ZNF726    | 0.715 | 0.7052 | <0.0001 |
| SLC39A10  | 0.844 | 0.7057 | <0.0001 |
| ALG8      | 0.928 | 0.7058 | <0.0001 |
| SF3B2     | 0.86  | 0.7059 | <0.0001 |
| GPANK1    | 0.903 | 0.7059 | <0.0001 |

|           |       |        |         |
|-----------|-------|--------|---------|
| C12orf10  | 0.909 | 0.7061 | <0.0001 |
| LEF1      | 0.903 | 0.7063 | <0.0001 |
| CDKAL1    | 0.929 | 0.7064 | <0.0001 |
| DLAT      | 0.809 | 0.7065 | <0.0001 |
| TTC39A    | 0.833 | 0.7065 | <0.0001 |
| E2F5      | 0.845 | 0.7065 | <0.0001 |
| LSM7      | 0.873 | 0.7065 | <0.0001 |
| URM1      | 0.881 | 0.7065 | <0.0001 |
| TSN       | 0.915 | 0.7065 | <0.0001 |
| ALKBH6    | 0.958 | 0.7065 | <0.0001 |
| MRPL48    | 0.844 | 0.7066 | <0.0001 |
| KDM3B     | 0.842 | 0.7067 | <0.0001 |
| PTPDC1    | 0.909 | 0.7067 | <0.0001 |
| GABRE     | 0.855 | 0.7068 | <0.0001 |
| DPY19L1P2 | 0.187 | 0.7069 | <0.0001 |
| TAF11     | 0.846 | 0.707  | <0.0001 |
| REG3A     | 0.703 | 0.7072 | <0.0001 |
| FHIT      | 0.862 | 0.7072 | <0.0001 |
| CREB3L4   | 0.787 | 0.7073 | <0.0001 |
| GORAB     | 0.808 | 0.7074 | <0.0001 |
| MNS1      | 0.806 | 0.7077 | <0.0001 |
| TAF5      | 0.88  | 0.7077 | <0.0001 |
| ATP1B1    | 0.896 | 0.708  | <0.0001 |
| FAM49B    | 0.887 | 0.7081 | <0.0001 |
| SERF1A    | 0.925 | 0.7082 | <0.0001 |
| PSMA6     | 0.969 | 0.7086 | 0.0004  |
| URB2      | 0.87  | 0.7086 | <0.0001 |
| TMEM183A  | 0.937 | 0.7086 | <0.0001 |
| BCAT1     | 0.864 | 0.7089 | <0.0001 |
| MAPRE1    | 0.936 | 0.709  | <0.0001 |
| TIMM50    | 0.917 | 0.7091 | <0.0001 |
| HTRA2     | 0.919 | 0.7092 | <0.0001 |
| DKK1      | 0.811 | 0.7096 | <0.0001 |

|          |       |        |         |
|----------|-------|--------|---------|
| CERS2    | 0.872 | 0.7096 | <0.0001 |
| ZNF200   | 0.901 | 0.7096 | <0.0001 |
| AP3S1    | 0.853 | 0.7097 | <0.0001 |
| RHOC     | 0.899 | 0.7097 | <0.0001 |
| HGH1     | 0.784 | 0.7098 | <0.0001 |
| ENY2     | 0.871 | 0.7098 | <0.0001 |
| C20orf96 | 0.922 | 0.7098 | <0.0001 |
| VASH2    | 0.788 | 0.7103 | <0.0001 |
| PES1     | 0.869 | 0.7105 | <0.0001 |
| TMEM241  | 0.875 | 0.7105 | <0.0001 |
| UBA2     | 0.87  | 0.7108 | <0.0001 |
| TRMT1    | 0.893 | 0.7109 | <0.0001 |
| BLVRA    | 0.913 | 0.7111 | <0.0001 |
| OTX1     | 0.878 | 0.7114 | <0.0001 |
| ANAPC5   | 0.864 | 0.7116 | <0.0001 |
| CALM3    | 0.812 | 0.7117 | <0.0001 |
| NAPB     | 0.937 | 0.712  | <0.0001 |
| PIP4K2B  | 0.898 | 0.7125 | <0.0001 |
| MARK4    | 0.933 | 0.7125 | <0.0001 |
| GTF2IP1  | 0.935 | 0.7126 | 0.0018  |
| RTKN2    | 0.909 | 0.7128 | <0.0001 |
| UBXN2B   | 0.821 | 0.7129 | <0.0001 |
| FAM216A  | 0.816 | 0.7133 | <0.0001 |
| ALKBH2   | 0.819 | 0.7133 | <0.0001 |
| GLDN     | 0.717 | 0.7137 | <0.0001 |
| PRDX1    | 0.902 | 0.714  | <0.0001 |
| CFL1P3   | 0.762 | 0.7141 | 0.0003  |
| C12orf49 | 0.781 | 0.7141 | <0.0001 |
| TCF3     | 0.841 | 0.7141 | <0.0001 |
| DPY30    | 0.917 | 0.7142 | <0.0001 |
| POLR1A   | 0.837 | 0.7143 | <0.0001 |
| TXNDC9   | 0.932 | 0.7144 | <0.0001 |
| LSM14B   | 0.908 | 0.7146 | <0.0001 |

|           |       |        |         |
|-----------|-------|--------|---------|
| ZSCAN29   | 0.937 | 0.7146 | <0.0001 |
| COX8A     | 0.875 | 0.7147 | <0.0001 |
| HKDC1     | 0.822 | 0.7148 | <0.0001 |
| ASNA1     | 0.883 | 0.7149 | <0.0001 |
| OXLD1     | 0.915 | 0.7149 | <0.0001 |
| DNAJC2    | 0.791 | 0.715  | <0.0001 |
| METTL23   | 0.69  | 0.7153 | <0.0001 |
| HMG2P15   | 0     | 0.7155 | <0.0001 |
| VPS13B    | 0.914 | 0.7156 | <0.0001 |
| LRRC8D    | 0.862 | 0.7158 | <0.0001 |
| COX4I2    | 0.945 | 0.7158 | <0.0001 |
| LINC01556 | 0     | 0.7159 | <0.0001 |
| EPPK1     | 0.916 | 0.716  | <0.0001 |
| SEC13     | 0.884 | 0.7163 | <0.0001 |
| NDUFS6    | 0.867 | 0.7165 | <0.0001 |
| DTNA      | 0.882 | 0.7166 | <0.0001 |
| PDGFRL    | 0.817 | 0.717  | <0.0001 |
| RPL38     | 0.929 | 0.7171 | <0.0001 |
| FAF1      | 0.885 | 0.7172 | <0.0001 |
| SEMA4F    | 0.865 | 0.7173 | <0.0001 |
| ATOX1     | 0.856 | 0.7176 | <0.0001 |
| ARID3A    | 0.761 | 0.7179 | <0.0001 |
| SAMM50    | 0.848 | 0.7181 | <0.0001 |
| ETV4      | 0.869 | 0.7181 | <0.0001 |
| CENPJ     | 0.887 | 0.7181 | <0.0001 |
| PSMC3     | 0.837 | 0.7186 | <0.0001 |
| PHAX      | 0.851 | 0.7189 | <0.0001 |
| TUBB2A    | 0.854 | 0.7189 | <0.0001 |
| DNAJB6    | 0.882 | 0.7192 | <0.0001 |
| BMT2      | 0.763 | 0.7197 | 0.0399  |
| OGG1      | 0.884 | 0.7201 | <0.0001 |
| RBM28     | 0.91  | 0.7201 | <0.0001 |
| FAM133A   | 0.592 | 0.7202 | <0.0001 |

|             |       |        |         |
|-------------|-------|--------|---------|
| PDSS1       | 0.882 | 0.7204 | <0.0001 |
| MANEAL      | 0.905 | 0.7205 | <0.0001 |
| BRIP1       | 0.935 | 0.7206 | <0.0001 |
| ABL2        | 0.938 | 0.7206 | <0.0001 |
| PIK3CB      | 0.901 | 0.7207 | <0.0001 |
| DNM1L       | 0.908 | 0.7208 | <0.0001 |
| MIR217HG    | 0.297 | 0.7209 | <0.0001 |
| DNM3        | 0.883 | 0.721  | <0.0001 |
| OTUD7B      | 0.94  | 0.7212 | <0.0001 |
| INTS2       | 0.911 | 0.7218 | <0.0001 |
| ENPP7P13    | 0     | 0.7221 | <0.0001 |
| MTERF3      | 0.732 | 0.7222 | <0.0001 |
| MAFG        | 0.908 | 0.7222 | <0.0001 |
| MIR6832     | 0.34  | 0.7224 | <0.0001 |
| CHTF18      | 0.864 | 0.7225 | <0.0001 |
| PTP4A3      | 0.873 | 0.7226 | <0.0001 |
| FKBP1A      | 0.922 | 0.7227 | <0.0001 |
| ZNF473      | 0.878 | 0.723  | <0.0001 |
| CBFA2T2     | 0.929 | 0.7233 | <0.0001 |
| EIF2B4      | 0.867 | 0.7235 | <0.0001 |
| G2E3        | 0.792 | 0.7237 | <0.0001 |
| PHF14       | 0.925 | 0.7237 | <0.0001 |
| RNASEH1-AS1 | 0.71  | 0.7238 | <0.0001 |
| LINC00528   | 0.316 | 0.724  | <0.0001 |
| EML6        | 0.855 | 0.724  | <0.0001 |
| TTC1        | 0.822 | 0.7241 | <0.0001 |
| POU2F1      | 0.884 | 0.7243 | <0.0001 |
| CDC73       | 0.919 | 0.7243 | <0.0001 |
| HAUS2       | 0.892 | 0.7244 | <0.0001 |
| CHRAC1      | 0.906 | 0.7244 | <0.0001 |
| FAM91A1     | 0.883 | 0.7249 | <0.0001 |
| SNRPB2      | 0.934 | 0.7254 | <0.0001 |
| SLC39A7     | 0.902 | 0.7255 | <0.0001 |

|            |       |        |         |
|------------|-------|--------|---------|
| LAMTOR1    | 0.734 | 0.726  | <0.0001 |
| GTF3C3     | 0.896 | 0.7269 | <0.0001 |
| PPP4R1-AS1 | 0     | 0.7271 | <0.0001 |
| NUDT17     | 0.85  | 0.7272 | <0.0001 |
| CRTC2      | 0.83  | 0.7274 | <0.0001 |
| FAM222B    | 0.766 | 0.7275 | <0.0001 |
| PAK1       | 0.854 | 0.7275 | <0.0001 |
| UBE2MP1    | 0.933 | 0.7278 | 0.0032  |
| DHX9       | 0.915 | 0.7278 | <0.0001 |
| SEC23B     | 0.914 | 0.7279 | <0.0001 |
| CKLF       | 0.896 | 0.7282 | <0.0001 |
| HIST1H2AE  | 0.876 | 0.7292 | <0.0001 |
| GNG4       | 0.769 | 0.7293 | <0.0001 |
| PSMD8      | 0.859 | 0.7295 | <0.0001 |
| UNC45A     | 0.928 | 0.7297 | <0.0001 |
| ARIH2OS    | 0.879 | 0.7298 | <0.0001 |
| LIN37      | 0.928 | 0.7299 | <0.0001 |
| TSG101     | 0.902 | 0.73   | <0.0001 |
| GPR137C    | 0.829 | 0.7304 | <0.0001 |
| BFSP1      | 0.897 | 0.7304 | <0.0001 |
| EEF1E1     | 0.915 | 0.7305 | <0.0001 |
| DNPH1      | 0.842 | 0.7312 | <0.0001 |
| HAUS1      | 0.864 | 0.7313 | <0.0001 |
| RRAGC      | 0.862 | 0.7314 | <0.0001 |
| HIST1H2BJ  | 0.908 | 0.7314 | <0.0001 |
| TRIM31     | 0.84  | 0.7315 | <0.0001 |
| GCNT3      | 0.718 | 0.7317 | <0.0001 |
| BAK1       | 0.836 | 0.7322 | <0.0001 |
| AHCTF1     | 0.914 | 0.7322 | <0.0001 |
| LINC01269  | 0     | 0.7324 | <0.0001 |
| CGREF1     | 0.818 | 0.7324 | <0.0001 |
| NCKAP1     | 0.916 | 0.7326 | <0.0001 |
| THOC2      | 0.935 | 0.7326 | <0.0001 |

|            |       |        |         |
|------------|-------|--------|---------|
| ASAP2      | 0.813 | 0.733  | <0.0001 |
| LRPPRC     | 0.916 | 0.733  | <0.0001 |
| CLSPN      | 0.931 | 0.7332 | <0.0001 |
| FITM2      | 0.87  | 0.7333 | <0.0001 |
| MAPK1      | 0.92  | 0.7335 | <0.0001 |
| C1orf216   | 0.831 | 0.7336 | <0.0001 |
| B3GNTL1    | 0.914 | 0.7339 | <0.0001 |
| MFF        | 0.864 | 0.734  | <0.0001 |
| SMC3       | 0.9   | 0.734  | <0.0001 |
| SF3B6      | 0.947 | 0.7343 | 0.0114  |
| CCDC124    | 0.795 | 0.7344 | <0.0001 |
| ZBED6CL    | 0.759 | 0.7345 | <0.0001 |
| TAF4       | 0.906 | 0.7345 | <0.0001 |
| CDKN2B     | 0.944 | 0.7347 | <0.0001 |
| SPCS1      | 0.878 | 0.7349 | <0.0001 |
| RPL7P6     | 0.893 | 0.735  | 0.0449  |
| TTC37      | 0.879 | 0.7352 | <0.0001 |
| TTC39A-AS1 | 0.38  | 0.7353 | <0.0001 |
| SREBF2     | 0.868 | 0.7355 | <0.0001 |
| TPRKB      | 0.913 | 0.7356 | <0.0001 |
| LMAN2      | 0.942 | 0.7358 | <0.0001 |
| EEF1A1P3   | 0.372 | 0.7359 | <0.0001 |
| RASSF4     | 0.854 | 0.7359 | <0.0001 |
| HIST1H3D   | 0.851 | 0.736  | <0.0001 |
| KIF5B      | 0.826 | 0.7363 | <0.0001 |
| TNPO3      | 0.909 | 0.7365 | <0.0001 |
| TMEM65     | 0.832 | 0.7367 | <0.0001 |
| UBL7       | 0.897 | 0.7368 | <0.0001 |
| FARSB      | 0.882 | 0.737  | <0.0001 |
| DHX35      | 0.907 | 0.7372 | <0.0001 |
| RNF8       | 0.924 | 0.7375 | <0.0001 |
| CLK2       | 0.953 | 0.7378 | <0.0001 |
| WASH6P     | 0.278 | 0.7379 | <0.0001 |

|          |       |        |         |
|----------|-------|--------|---------|
| GDPD1    | 0.936 | 0.7379 | <0.0001 |
| RNF213   | 0.85  | 0.7381 | <0.0001 |
| RCCD1    | 0.905 | 0.7382 | <0.0001 |
| PRKRIP1  | 0.85  | 0.7383 | <0.0001 |
| VGLL4    | 0.841 | 0.7385 | <0.0001 |
| SMARCD1  | 0.901 | 0.7385 | <0.0001 |
| PPM1F    | 0.835 | 0.7389 | <0.0001 |
| SRP14    | 0.888 | 0.7395 | <0.0001 |
| KCNN3    | 0.929 | 0.7396 | <0.0001 |
| REXO4    | 0.832 | 0.7397 | <0.0001 |
| FADD     | 0.905 | 0.74   | <0.0001 |
| EIF6     | 0.867 | 0.7403 | <0.0001 |
| TTC27    | 0.944 | 0.7407 | <0.0001 |
| THAP8    | 0.894 | 0.7413 | <0.0001 |
| C12orf73 | 0.951 | 0.7413 | <0.0001 |
| LHX4-AS1 | 0.446 | 0.7414 | <0.0001 |
| TRAPPC9  | 0.85  | 0.7416 | <0.0001 |
| RINT1    | 0.874 | 0.7416 | <0.0001 |
| ATF2     | 0.89  | 0.7416 | <0.0001 |
| TRIM27   | 0.894 | 0.7418 | <0.0001 |
| ANP32E   | 0.966 | 0.7418 | <0.0001 |
| AHSA1    | 0.863 | 0.7421 | <0.0001 |
| MIR3942  | 0.186 | 0.7425 | <0.0001 |
| SRPRB    | 0.855 | 0.7427 | <0.0001 |
| DDB1     | 0.913 | 0.7427 | <0.0001 |
| NFRKB    | 0.921 | 0.7427 | <0.0001 |
| STMND1   | 0.541 | 0.7428 | <0.0001 |
| HNRNPU   | 0.892 | 0.7428 | <0.0001 |
| SEC63P1  | 0     | 0.7429 | <0.0001 |
| FADS1    | 0.848 | 0.7429 | <0.0001 |
| MRPS14   | 0.892 | 0.743  | <0.0001 |
| TAF10    | 0.896 | 0.7431 | <0.0001 |
| C18orf21 | 0.878 | 0.7436 | <0.0001 |



|                |       |        |         |
|----------------|-------|--------|---------|
| SRRD           | 0.825 | 0.744  | <0.0001 |
| EDIL3          | 0.94  | 0.7441 | <0.0001 |
| BEND3          | 0.838 | 0.7443 | <0.0001 |
| KIF3A          | 0.892 | 0.7445 | <0.0001 |
| NOMO1          | 0.87  | 0.7447 | <0.0001 |
| PPP1CA         | 0.903 | 0.7447 | <0.0001 |
| SNORA2C        | 0.707 | 0.7452 | 0.034   |
| HIST2H2AC      | 0.887 | 0.7453 | <0.0001 |
| DEK            | 0.902 | 0.7455 | <0.0001 |
| ZNF512         | 0.912 | 0.7458 | <0.0001 |
| PLCG1          | 0.884 | 0.7461 | <0.0001 |
| FBXO32         | 0.834 | 0.7462 | <0.0001 |
| HIST1H2BF      | 0.894 | 0.7462 | <0.0001 |
| PRPF31         | 0.837 | 0.7464 | <0.0001 |
| FSD1L          | 0.881 | 0.7466 | <0.0001 |
| EXOC7          | 0.933 | 0.7466 | <0.0001 |
| TMPO           | 0.897 | 0.7467 | <0.0001 |
| NDRG1          | 0.842 | 0.7468 | <0.0001 |
| C12orf75       | 0.808 | 0.7469 | <0.0001 |
| MMP12          | 0.821 | 0.7469 | <0.0001 |
| RHEB           | 0.914 | 0.7469 | <0.0001 |
| HIST2H2BE      | 0.863 | 0.747  | <0.0001 |
| ZSCAN16        | 0.828 | 0.7472 | <0.0001 |
| STAMBP         | 0.917 | 0.7473 | <0.0001 |
| NXT2           | 0.882 | 0.7474 | <0.0001 |
| POP5           | 0.878 | 0.7476 | <0.0001 |
| SIRT7          | 0.873 | 0.7477 | <0.0001 |
| RBMX2          | 0.877 | 0.7479 | <0.0001 |
| KAT7           | 0.836 | 0.7481 | <0.0001 |
| TUBB4B         | 0.847 | 0.7482 | <0.0001 |
| RPLP0          | 0.892 | 0.7482 | <0.0001 |
| PSMD13         | 0.91  | 0.7482 | <0.0001 |
| TMEM189-UBE2V1 | 0.903 | 0.7487 | 0.0116  |

|             |       |        |         |
|-------------|-------|--------|---------|
| ZNF581      | 0.807 | 0.7487 | <0.0001 |
| SPA17       | 0.893 | 0.7487 | <0.0001 |
| FUBP1       | 0.902 | 0.7487 | <0.0001 |
| AZIN1       | 0.9   | 0.7492 | <0.0001 |
| TRMT112     | 0.917 | 0.7492 | <0.0001 |
| C3orf67-AS1 | 0     | 0.7494 | <0.0001 |
| ZMAT2       | 0.848 | 0.7496 | <0.0001 |
| STK25       | 0.88  | 0.7502 | <0.0001 |
| SDF2L1      | 0.888 | 0.7502 | <0.0001 |
| PMVK        | 0.873 | 0.7503 | <0.0001 |
| GPR107      | 0.904 | 0.7503 | <0.0001 |
| SMYD2       | 0.86  | 0.7506 | <0.0001 |
| DUSP23      | 0.851 | 0.7509 | <0.0001 |
| LAMA3       | 0.882 | 0.7509 | <0.0001 |
| NUDCD3      | 0.909 | 0.7511 | <0.0001 |
| KCTD6       | 0.929 | 0.7511 | <0.0001 |
| LAMTOR4     | 0.915 | 0.7513 | 0.0001  |
| ERCC2       | 0.904 | 0.7514 | <0.0001 |
| BRIX1       | 0.923 | 0.7515 | <0.0001 |
| C2orf76     | 0.907 | 0.7517 | <0.0001 |
| CENPX       | 0.79  | 0.7518 | 0.017   |
| ZSCAN25     | 0.645 | 0.7522 | <0.0001 |
| ERAL1       | 0.775 | 0.7523 | <0.0001 |
| NCBP2       | 0.908 | 0.7523 | <0.0001 |
| C9orf40     | 0.817 | 0.7528 | <0.0001 |
| HOTTIP      | 0.9   | 0.7529 | 0.0002  |
| UGGT1       | 0.871 | 0.753  | <0.0001 |
| ARV1        | 0.831 | 0.7531 | <0.0001 |
| RARS        | 0.895 | 0.7531 | <0.0001 |
| RFC5        | 0.891 | 0.7534 | <0.0001 |
| HEXA        | 0.899 | 0.7536 | <0.0001 |
| PABPC4L     | 0.884 | 0.7537 | <0.0001 |
| XRCC6       | 0.924 | 0.7538 | <0.0001 |

|           |       |        |         |
|-----------|-------|--------|---------|
| ZC3HC1    | 0.792 | 0.754  | <0.0001 |
| PRKAA2    | 0.827 | 0.7543 | <0.0001 |
| EXOSC5    | 0.835 | 0.7543 | <0.0001 |
| MYL6B     | 0.886 | 0.7543 | <0.0001 |
| RFT1      | 0.848 | 0.7544 | <0.0001 |
| LCMT1     | 0.915 | 0.7546 | <0.0001 |
| CSE1L-AS1 | 0.504 | 0.7547 | 0.0047  |
| HYOU1     | 0.889 | 0.7547 | <0.0001 |
| KLHDC3    | 0.86  | 0.7548 | <0.0001 |
| C10orf88  | 0.884 | 0.755  | <0.0001 |
| B4GALNT1  | 0.866 | 0.7551 | <0.0001 |
| HNF1A-AS1 | 0.828 | 0.7552 | <0.0001 |
| ZNF207    | 0.947 | 0.7553 | <0.0001 |
| C9orf16   | 0.849 | 0.7554 | <0.0001 |
| TPM3      | 0.942 | 0.7557 | <0.0001 |
| MICB      | 0.843 | 0.756  | <0.0001 |
| PLEKHA8P1 | 0.783 | 0.7562 | <0.0001 |
| DHX8      | 0.86  | 0.7562 | <0.0001 |
| GDI1      | 0.865 | 0.7563 | <0.0001 |
| TREM2     | 0.885 | 0.7565 | <0.0001 |
| TNFSF4    | 0.862 | 0.7567 | <0.0001 |
| KIFAP3    | 0.875 | 0.757  | <0.0001 |
| COLGALT1  | 0.823 | 0.7571 | <0.0001 |
| MRPS17    | 0.929 | 0.7573 | <0.0001 |
| TIMM17B   | 0.865 | 0.7574 | <0.0001 |
| ARF4P2    | 0     | 0.7575 | <0.0001 |
| PRKAR2A   | 0.922 | 0.7575 | <0.0001 |
| GLULP4    | 0.891 | 0.7576 | 0.0341  |
| FAM104A   | 0.888 | 0.7578 | <0.0001 |
| POC5      | 0.769 | 0.7579 | <0.0001 |
| PCGF1     | 0.808 | 0.758  | <0.0001 |
| NFYA      | 0.888 | 0.7581 | <0.0001 |
| LYPD8     | 0.674 | 0.7586 | <0.0001 |

|           |       |        |         |
|-----------|-------|--------|---------|
| CIZ1      | 0.828 | 0.7586 | <0.0001 |
| RPRD2     | 0.85  | 0.7588 | <0.0001 |
| RAE1      | 0.893 | 0.7588 | <0.0001 |
| TXN       | 0.916 | 0.7589 | <0.0001 |
| GOLGA2P7  | 0.622 | 0.7592 | 0.0038  |
| WIPF2     | 0.9   | 0.7593 | <0.0001 |
| FXR1      | 0.921 | 0.7594 | <0.0001 |
| ASRGL1    | 0.892 | 0.7595 | <0.0001 |
| NELFB     | 0.83  | 0.7599 | <0.0001 |
| SNX12     | 0.855 | 0.7599 | <0.0001 |
| SRP9      | 0.931 | 0.7599 | <0.0001 |
| ZFR       | 0.918 | 0.7601 | <0.0001 |
| LINC01287 | 0.212 | 0.7604 | <0.0001 |
| BORCS6    | 0.409 | 0.7605 | <0.0001 |
| PPIP5K1   | 0.857 | 0.7605 | <0.0001 |
| LCN2      | 0.839 | 0.7606 | <0.0001 |
| SNRPEP4   | 0.93  | 0.761  | 0.0331  |
| ATRAID    | 0.951 | 0.7612 | 0.0008  |
| RAB23     | 0.831 | 0.7612 | <0.0001 |
| PITX1     | 0.874 | 0.7614 | <0.0001 |
| UBE3B     | 0.885 | 0.7614 | <0.0001 |
| DPY19L1P1 | 0.884 | 0.7618 | <0.0001 |
| FN3KRP    | 0.818 | 0.762  | <0.0001 |
| DSTNP2    | 0.91  | 0.7622 | <0.0001 |
| TSEN54    | 0.853 | 0.7626 | <0.0001 |
| ZC3H3     | 0.911 | 0.7628 | <0.0001 |
| USP3      | 0.855 | 0.7631 | <0.0001 |
| PPP1R16A  | 0.922 | 0.7632 | <0.0001 |
| SMIM13    | 0.762 | 0.7634 | <0.0001 |
| LINC01151 | 0     | 0.7641 | <0.0001 |
| SLC35E3   | 0.84  | 0.7643 | <0.0001 |
| NSL1      | 0.945 | 0.7643 | <0.0001 |
| ACTG1P1   | 0.777 | 0.7644 | 0.0018  |

|             |       |        |         |
|-------------|-------|--------|---------|
| LINC01545   | 0.142 | 0.7644 | <0.0001 |
| CASP2       | 0.929 | 0.7644 | <0.0001 |
| ZSCAN16-AS1 | 0.874 | 0.7645 | 0.0007  |
| XYLT2       | 0.9   | 0.7645 | <0.0001 |
| LIX1L       | 0.875 | 0.7647 | <0.0001 |
| CUL4B       | 0.903 | 0.7648 | <0.0001 |
| RAB3GAP2    | 0.944 | 0.7648 | <0.0001 |
| GRAMD1A     | 0.801 | 0.765  | <0.0001 |
| ENO1        | 0.89  | 0.765  | <0.0001 |
| APEX1       | 0.885 | 0.7653 | <0.0001 |
| PRKAB1      | 0.853 | 0.7655 | <0.0001 |
| GJC1        | 0.96  | 0.7658 | <0.0001 |
| PPP2R5D     | 0.895 | 0.7666 | <0.0001 |
| TUG1        | 0.813 | 0.767  | <0.0001 |
| RHOQP2      | 0.374 | 0.7672 | <0.0001 |
| DNAH14      | 0.878 | 0.7674 | <0.0001 |
| ATG7        | 0.91  | 0.7675 | <0.0001 |
| NUTF2       | 0.882 | 0.7678 | <0.0001 |
| NUP43       | 0.883 | 0.7679 | <0.0001 |
| LRR1        | 0.7   | 0.768  | <0.0001 |
| TULP4       | 0.896 | 0.768  | <0.0001 |
| RNVU1-6     | 0.453 | 0.7684 | <0.0001 |
| EMC3-AS1    | 0.805 | 0.7686 | <0.0001 |
| RSRC1       | 0.892 | 0.7687 | <0.0001 |
| UQCRH       | 0.921 | 0.7688 | <0.0001 |
| RHOA        | 0.936 | 0.7691 | <0.0001 |
| WDR46       | 0.872 | 0.7692 | <0.0001 |
| NAGPA       | 0.872 | 0.7692 | <0.0001 |
| NEDD8       | 0.908 | 0.7693 | <0.0001 |
| NEB         | 0.792 | 0.7694 | <0.0001 |
| LOXL2       | 0.932 | 0.7697 | <0.0001 |
| FASTK       | 0.924 | 0.7699 | <0.0001 |
| CD200       | 0.94  | 0.7707 | <0.0001 |

|             |       |        |         |
|-------------|-------|--------|---------|
| SRP68       | 0.842 | 0.7708 | <0.0001 |
| MAPKAPK5    | 0.867 | 0.7709 | <0.0001 |
| DCTPP1      | 0.894 | 0.7709 | <0.0001 |
| HIST1H2AI   | 0.9   | 0.7711 | <0.0001 |
| RAC1        | 0.902 | 0.7711 | <0.0001 |
| NARS        | 0.922 | 0.7715 | <0.0001 |
| AIDA        | 0.879 | 0.7716 | <0.0001 |
| KDM5B       | 0.844 | 0.7718 | <0.0001 |
| TMEM164     | 0.906 | 0.7718 | <0.0001 |
| GPRIN1      | 0.918 | 0.7718 | <0.0001 |
| MASTL       | 0.891 | 0.7719 | <0.0001 |
| APH1A       | 0.906 | 0.7719 | <0.0001 |
| NCAPH2      | 0.934 | 0.7719 | <0.0001 |
| FANCA       | 0.938 | 0.772  | <0.0001 |
| WDCP        | 0.793 | 0.7722 | 0.0246  |
| S100P       | 0.799 | 0.7722 | <0.0001 |
| RASGRF2-AS1 | 0     | 0.7723 | <0.0001 |
| EBF2        | 0.948 | 0.7724 | <0.0001 |
| FTH1        | 0.918 | 0.7726 | <0.0001 |
| EIF2B2      | 0.882 | 0.7727 | <0.0001 |
| DLL4        | 0.906 | 0.7727 | <0.0001 |
| NME2        | 0.955 | 0.7729 | 0.0009  |
| SNRPG       | 0.924 | 0.773  | <0.0001 |
| PHF19       | 0.899 | 0.7734 | <0.0001 |
| ACTR5       | 0.856 | 0.7735 | <0.0001 |
| PDAP1       | 0.89  | 0.7735 | <0.0001 |
| NUP93       | 0.896 | 0.7736 | <0.0001 |
| MSH5        | 0.966 | 0.7737 | 0.0002  |
| ITGA2       | 0.854 | 0.7737 | <0.0001 |
| EIF3K       | 0.899 | 0.7737 | <0.0001 |
| IFI27L1     | 0.921 | 0.7738 | <0.0001 |
| CERS5       | 0.892 | 0.7739 | <0.0001 |
| MLEC        | 0.901 | 0.7739 | <0.0001 |

|           |       |        |         |
|-----------|-------|--------|---------|
| SATB2     | 0.792 | 0.774  | <0.0001 |
| GAPDH     | 0.91  | 0.774  | <0.0001 |
| STC1      | 0.881 | 0.7744 | <0.0001 |
| H1F0      | 0.864 | 0.7747 | <0.0001 |
| CBLL1     | 0.876 | 0.7747 | <0.0001 |
| FAM219B   | 0.918 | 0.7747 | <0.0001 |
| TOR3A     | 0.714 | 0.7748 | <0.0001 |
| CRNKL1    | 0.912 | 0.7748 | <0.0001 |
| CSNK2A1   | 0.892 | 0.7749 | <0.0001 |
| RPS18P12  | 0.248 | 0.775  | <0.0001 |
| CEP152    | 0.897 | 0.7753 | <0.0001 |
| FAM200A   | 0.847 | 0.7754 | <0.0001 |
| PIK3C2B   | 0.849 | 0.7755 | <0.0001 |
| ACTG2     | 0.866 | 0.7755 | <0.0001 |
| LRRC37A6P | 0.635 | 0.7756 | <0.0001 |
| ANAPC1    | 0.912 | 0.7756 | <0.0001 |
| CABYR     | 0.766 | 0.7761 | <0.0001 |
| SNORD81   | 0     | 0.7762 | <0.0001 |
| ANGPT2    | 0.87  | 0.7765 | <0.0001 |
| CSNK1D    | 0.921 | 0.7765 | <0.0001 |
| RPS5      | 0.86  | 0.7768 | <0.0001 |
| MESP1     | 0.933 | 0.7769 | <0.0001 |
| LINC01608 | 0     | 0.777  | <0.0001 |
| TIGD7     | 0.873 | 0.777  | <0.0001 |
| GPATCH1   | 0.803 | 0.7774 | <0.0001 |
| BLOC1S5   | 0     | 0.7775 | <0.0001 |
| TUBG2     | 0.918 | 0.7779 | <0.0001 |
| AP4M1     | 0.894 | 0.7781 | <0.0001 |
| IK        | 0.899 | 0.7785 | <0.0001 |
| RPLP1     | 0.919 | 0.7786 | <0.0001 |
| RIPK2     | 0.791 | 0.7787 | <0.0001 |
| NDUFA1    | 0.917 | 0.7788 | <0.0001 |
| TRRAP     | 0.914 | 0.7789 | <0.0001 |

|           |       |        |         |
|-----------|-------|--------|---------|
| DDX10     | 0.906 | 0.7791 | <0.0001 |
| ZFYVE26   | 0.847 | 0.7793 | <0.0001 |
| RPL13P5   | 0.849 | 0.7793 | <0.0001 |
| GALNT10   | 0.909 | 0.7793 | <0.0001 |
| MIR4468   | 0.236 | 0.7795 | <0.0001 |
| RP9       | 0.819 | 0.7795 | <0.0001 |
| PARP12    | 0.881 | 0.7797 | <0.0001 |
| NOL11     | 0.884 | 0.7797 | <0.0001 |
| GOLGA3    | 0.909 | 0.7798 | <0.0001 |
| NEK7      | 0.896 | 0.7799 | <0.0001 |
| CHCHD3    | 0.901 | 0.7799 | <0.0001 |
| SMG8      | 0.842 | 0.7801 | <0.0001 |
| TMEM115   | 0.906 | 0.7802 | <0.0001 |
| YWHAG     | 0.893 | 0.7803 | <0.0001 |
| DVL3      | 0.909 | 0.7803 | <0.0001 |
| GPN1      | 0.883 | 0.7804 | <0.0001 |
| MFAP1     | 0.896 | 0.7804 | <0.0001 |
| FGD1      | 0.913 | 0.7804 | <0.0001 |
| ENTPD6    | 0.893 | 0.7809 | <0.0001 |
| MAFA-AS1  | 0     | 0.7811 | <0.0001 |
| TRAM1     | 0.899 | 0.7815 | <0.0001 |
| DAPK2     | 0.874 | 0.7817 | <0.0001 |
| RPL9P7    | 0.441 | 0.782  | <0.0001 |
| SLC25A40  | 0.899 | 0.7823 | <0.0001 |
| DENND5A   | 0.852 | 0.7824 | <0.0001 |
| ZMYND19   | 0.865 | 0.7825 | <0.0001 |
| LINC00674 | 0.96  | 0.7826 | 0.023   |
| JRKL      | 0.868 | 0.783  | <0.0001 |
| IMPDH1P6  | 0.452 | 0.7835 | <0.0001 |
| ATP6V1E2  | 0.78  | 0.7835 | <0.0001 |
| PRRC1     | 0.895 | 0.7836 | <0.0001 |
| SPNS1     | 0.976 | 0.784  | 0.0005  |
| SLC4A2    | 0.899 | 0.7843 | <0.0001 |



|         |       |        |         |
|---------|-------|--------|---------|
| CBX3    | 0.913 | 0.7849 | <0.0001 |
| PKMYT1  | 0.931 | 0.7849 | <0.0001 |
| RALGAPB | 0.868 | 0.785  | <0.0001 |
| ZNF707  | 0.867 | 0.7854 | <0.0001 |
| MID1IP1 | 0.905 | 0.7854 | <0.0001 |
| ASNSP1  | 0.374 | 0.7855 | <0.0001 |
| VAR5    | 0.908 | 0.7855 | <0.0001 |
| ACTN4   | 0.815 | 0.7859 | <0.0001 |
| IARS2   | 0.86  | 0.7861 | <0.0001 |
| EMC4    | 0.942 | 0.7862 | 0.0008  |
| PRPSAP1 | 0.864 | 0.7862 | <0.0001 |
| COMMD3  | 0.907 | 0.7862 | <0.0001 |
| NBAS    | 0.923 | 0.7862 | <0.0001 |
| POP4    | 0.901 | 0.7863 | <0.0001 |
| GMPSP1  | 0.714 | 0.7866 | 0.0234  |
| SIX4    | 0.829 | 0.7866 | <0.0001 |
| SWAP70  | 0.91  | 0.7873 | <0.0001 |
| CUL2    | 0.869 | 0.7875 | <0.0001 |
| RUFY1   | 0.913 | 0.7876 | <0.0001 |
| AP1S1   | 0.911 | 0.7879 | <0.0001 |
| HEXB    | 0.897 | 0.7881 | <0.0001 |
| CENPP   | 0.923 | 0.7882 | <0.0001 |
| SIPA1L3 | 0.901 | 0.7883 | <0.0001 |
| ZNF341  | 0.835 | 0.7884 | <0.0001 |
| SMAD2   | 0.94  | 0.7891 | <0.0001 |
| GPI     | 0.705 | 0.7893 | <0.0001 |
| KCNE5   | 0.673 | 0.7894 | 0.0002  |
| SF3A3   | 0.858 | 0.7894 | <0.0001 |
| HRAS    | 0.897 | 0.7897 | <0.0001 |
| NEDD1   | 0.919 | 0.7898 | <0.0001 |
| DDX27   | 0.932 | 0.79   | <0.0001 |
| BANF1P3 | 0.91  | 0.7901 | 0.0331  |
| UNK     | 0.882 | 0.7902 | <0.0001 |

|             |       |        |         |
|-------------|-------|--------|---------|
| PIGF        | 0.913 | 0.7903 | <0.0001 |
| COMMD3-BMI1 | 0     | 0.7905 | <0.0001 |
| CA12        | 0.786 | 0.7906 | <0.0001 |
| VPS25       | 0.862 | 0.7906 | <0.0001 |
| HCFC1       | 0.911 | 0.7906 | <0.0001 |
| LOC339803   | 0.874 | 0.7907 | <0.0001 |
| PXMP4       | 0.921 | 0.7908 | <0.0001 |
| ZNF282      | 0.874 | 0.7914 | <0.0001 |
| PFDN2       | 0.864 | 0.7916 | <0.0001 |
| HSPB11      | 0.819 | 0.7919 | <0.0001 |
| CCDC138     | 0.885 | 0.7919 | <0.0001 |
| NPSR1-AS1   | 0.745 | 0.792  | <0.0001 |
| ATXN7L3     | 0.912 | 0.7921 | <0.0001 |
| HIST1H3B    | 0.916 | 0.7922 | <0.0001 |
| TLL4        | 0.792 | 0.7923 | <0.0001 |
| DNAJC13     | 0.917 | 0.7923 | <0.0001 |
| HSF2BP      | 0.923 | 0.7924 | <0.0001 |
| MINCR       | 0     | 0.7927 | <0.0001 |
| ANAPC11     | 0.917 | 0.7927 | <0.0001 |
| SMG9        | 0.809 | 0.7928 | <0.0001 |
| VPS11       | 0.895 | 0.7929 | <0.0001 |
| GNA12       | 0.876 | 0.793  | <0.0001 |
| RAD1        | 0.939 | 0.7932 | <0.0001 |
| CEMIP       | 0.398 | 0.7934 | <0.0001 |
| STAU2       | 0.886 | 0.7936 | <0.0001 |
| PRRC2C      | 0.812 | 0.7937 | <0.0001 |
| ZSCAN2      | 0.946 | 0.7943 | <0.0001 |
| APOBEC3B    | 0.841 | 0.7945 | <0.0001 |
| SDE2        | 0.847 | 0.7945 | <0.0001 |
| ATP6V1H     | 0.917 | 0.7946 | <0.0001 |
| CCDC167     | 0.616 | 0.7951 | <0.0001 |
| CAPNS1      | 0.886 | 0.7952 | <0.0001 |
| C7orf50     | 0.872 | 0.7953 | <0.0001 |

|            |       |        |         |
|------------|-------|--------|---------|
| BANF1      | 0.918 | 0.7953 | <0.0001 |
| TALDO1     | 0.89  | 0.7954 | <0.0001 |
| HTATSF1    | 0.929 | 0.7957 | <0.0001 |
| IFT81      | 0.885 | 0.7962 | <0.0001 |
| RPTOR      | 0.794 | 0.7966 | <0.0001 |
| RBM3       | 0.916 | 0.7974 | <0.0001 |
| MSH6       | 0.867 | 0.7977 | <0.0001 |
| PRPF3      | 0.934 | 0.7978 | <0.0001 |
| RBM8A      | 0.937 | 0.7978 | <0.0001 |
| RNF34      | 0.923 | 0.7983 | <0.0001 |
| DSTYK      | 0.869 | 0.7986 | <0.0001 |
| TBCC       | 0.887 | 0.7986 | <0.0001 |
| KCNMB2-AS1 | 0.513 | 0.7987 | 0.0159  |
| FAT1       | 0.846 | 0.799  | <0.0001 |
| ZNF260     | 0.91  | 0.799  | <0.0001 |
| GOSR2      | 0.962 | 0.799  | <0.0001 |
| PSMC3IP    | 0.897 | 0.7991 | <0.0001 |
| YIPF3      | 0.895 | 0.7992 | <0.0001 |
| GTF2H2C    | 0.811 | 0.7993 | <0.0001 |
| CDK5RAP2   | 0.868 | 0.7997 | <0.0001 |
| TMEM14C    | 0.927 | 0.7997 | <0.0001 |
| SPATC1L    | 0.9   | 0.8001 | <0.0001 |
| CABLES2    | 0.831 | 0.8002 | <0.0001 |
| NKAP       | 0.913 | 0.8006 | <0.0001 |
| ZNF706     | 0.908 | 0.8007 | <0.0001 |
| PMF1       | 0.844 | 0.8008 | <0.0001 |
| RPIA       | 0.857 | 0.801  | <0.0001 |
| RASGRF2    | 0.879 | 0.8014 | <0.0001 |
| DDX1       | 0.893 | 0.8018 | <0.0001 |
| GPATCH2    | 0.824 | 0.8021 | <0.0001 |
| SNORD75    | 0.671 | 0.8023 | 0.0047  |
| ZNF696     | 0.867 | 0.8024 | <0.0001 |
| PDIA6      | 0.854 | 0.8025 | <0.0001 |

|           |       |        |         |
|-----------|-------|--------|---------|
| ABCD1     | 0.851 | 0.8026 | <0.0001 |
| BTG3      | 0.931 | 0.8027 | <0.0001 |
| ZEB1-AS1  | 0.892 | 0.8034 | 0.0002  |
| NUP85     | 0.901 | 0.8034 | <0.0001 |
| ENOPH1    | 0.838 | 0.8052 | <0.0001 |
| C1orf198  | 0.8   | 0.8054 | <0.0001 |
| CLTA      | 0.911 | 0.8058 | <0.0001 |
| HIST1H2AG | 0.893 | 0.8064 | <0.0001 |
| MGAT4A    | 0.841 | 0.8066 | <0.0001 |
| LEMD2     | 0.824 | 0.8067 | <0.0001 |
| WASF1     | 0.912 | 0.8067 | <0.0001 |
| DRAP1     | 0.92  | 0.8067 | <0.0001 |
| ZSCAN31   | 0.758 | 0.8069 | <0.0001 |
| TMPO-AS1  | 0.908 | 0.807  | 0.0009  |
| UTP6      | 0.896 | 0.8071 | <0.0001 |
| MAPK9     | 0.908 | 0.8071 | <0.0001 |
| CDK16     | 0.84  | 0.8072 | <0.0001 |
| TAF9      | 0.904 | 0.8074 | <0.0001 |
| STK39     | 0.874 | 0.8075 | <0.0001 |
| STAM      | 0.895 | 0.8079 | <0.0001 |
| PDCL3     | 0.888 | 0.8081 | <0.0001 |
| CTTN      | 0.898 | 0.8081 | <0.0001 |
| HCG15     | 0.482 | 0.8082 | <0.0001 |
| SEC61G    | 0.923 | 0.8086 | <0.0001 |
| TFRC      | 0.906 | 0.8087 | <0.0001 |
| PTGES3    | 0.932 | 0.8092 | <0.0001 |
| CRIP3     | 0.868 | 0.8101 | <0.0001 |
| CEP350    | 0.907 | 0.8102 | <0.0001 |
| FANCB     | 0.912 | 0.8105 | <0.0001 |
| PSRC1     | 0.922 | 0.8106 | <0.0001 |
| TRIM16    | 0.881 | 0.8107 | <0.0001 |
| POLR3F    | 0.912 | 0.8107 | <0.0001 |
| PET117    | 0.953 | 0.8109 | 0.0035  |

|              |       |        |         |
|--------------|-------|--------|---------|
| C1orf131     | 0.889 | 0.8111 | <0.0001 |
| EIF3D        | 0.851 | 0.8112 | <0.0001 |
| PFN1P11      | 0     | 0.8114 | <0.0001 |
| DONSON       | 0.925 | 0.8115 | <0.0001 |
| HNRNPA1P12   | 0.853 | 0.8116 | 0.0099  |
| BOD1         | 0.815 | 0.8118 | <0.0001 |
| OLA1         | 0.917 | 0.8119 | <0.0001 |
| METTL3       | 0.938 | 0.8119 | <0.0001 |
| SLC35B1      | 0.867 | 0.8124 | <0.0001 |
| ADIPOR1      | 0.895 | 0.8124 | <0.0001 |
| ZMPSTE24     | 0.896 | 0.8125 | <0.0001 |
| TATDN1       | 0.917 | 0.8126 | <0.0001 |
| BRAT1        | 0.863 | 0.813  | <0.0001 |
| CEBPG        | 0.87  | 0.8131 | <0.0001 |
| LYPD1        | 0.84  | 0.8132 | <0.0001 |
| ZCCHC17      | 0.838 | 0.8133 | <0.0001 |
| USP14        | 0.897 | 0.8141 | <0.0001 |
| SUMO2        | 0.945 | 0.8141 | <0.0001 |
| ZIC5         | 0.834 | 0.8144 | <0.0001 |
| COPG1        | 0.806 | 0.8145 | <0.0001 |
| STX10        | 0.91  | 0.8146 | <0.0001 |
| PA2G4        | 0.859 | 0.8152 | <0.0001 |
| WDR53        | 0.912 | 0.8156 | <0.0001 |
| RAN          | 0.878 | 0.816  | <0.0001 |
| FAM86JP      | 0.858 | 0.8162 | 0.0008  |
| PPP4R1       | 0.918 | 0.8162 | <0.0001 |
| DCAF7        | 0.9   | 0.8163 | <0.0001 |
| SOX9-AS1     | 0.885 | 0.8166 | 0.0002  |
| LOC100499489 | 0.29  | 0.8168 | <0.0001 |
| MAGED2       | 0.933 | 0.8168 | <0.0001 |
| HTATIP2      | 0.853 | 0.8171 | <0.0001 |
| DCK          | 0.925 | 0.8179 | <0.0001 |
| ABCC4        | 0.882 | 0.818  | <0.0001 |

|           |       |        |         |
|-----------|-------|--------|---------|
| USP1      | 0.915 | 0.818  | <0.0001 |
| ADNP      | 0.898 | 0.8182 | <0.0001 |
| AIFM2     | 0.852 | 0.8186 | <0.0001 |
| TLL1      | 0.934 | 0.8187 | <0.0001 |
| PWP1      | 0.891 | 0.8188 | <0.0001 |
| NEDD4L    | 0.9   | 0.8188 | <0.0001 |
| LINC01063 | 0.359 | 0.8191 | <0.0001 |
| NRM       | 0.871 | 0.8191 | <0.0001 |
| LRRC59    | 0.889 | 0.8191 | <0.0001 |
| ACTBP7    | 0     | 0.8198 | <0.0001 |
| LANCL1    | 0.919 | 0.8199 | <0.0001 |
| HSP90AB3P | 0.881 | 0.82   | 0.0008  |
| ZNF174    | 0.92  | 0.8201 | <0.0001 |
| WBP1LP2   | 0.604 | 0.8203 | 0.0051  |
| CHRM3     | 0.851 | 0.8208 | <0.0001 |
| NAT10     | 0.89  | 0.8215 | <0.0001 |
| MIR1291   | 0     | 0.8216 | <0.0001 |
| LINC01132 | 0     | 0.8217 | <0.0001 |
| SNAP47    | 0.848 | 0.8218 | <0.0001 |
| RPP21     | 0.93  | 0.8218 | <0.0001 |
| CCDC93    | 0.929 | 0.8221 | <0.0001 |
| CAMSAP2   | 0.749 | 0.8223 | <0.0001 |
| PPP2R1A   | 0.86  | 0.8223 | <0.0001 |
| CSPG4     | 0.915 | 0.8229 | <0.0001 |
| CYSTM1    | 0.913 | 0.8232 | <0.0001 |
| HPF1      | 0.479 | 0.8233 | <0.0001 |
| TAF1A     | 0.913 | 0.8234 | <0.0001 |
| RAB10     | 0.873 | 0.8235 | <0.0001 |
| RANP1     | 0.886 | 0.8236 | 0.0033  |
| WSB2      | 0.896 | 0.8236 | <0.0001 |
| RDM1      | 0.906 | 0.824  | <0.0001 |
| STXBP4    | 0.863 | 0.8242 | <0.0001 |
| ALDH18A1  | 0.849 | 0.8247 | <0.0001 |

|            |       |        |         |
|------------|-------|--------|---------|
| NQO1       | 0.807 | 0.8249 | <0.0001 |
| HSF2       | 0.875 | 0.825  | <0.0001 |
| BRCA1      | 0.928 | 0.825  | <0.0001 |
| UBE2M      | 0.904 | 0.8251 | <0.0001 |
| RPP40      | 0.875 | 0.8252 | <0.0001 |
| DPF2       | 0.905 | 0.8254 | <0.0001 |
| MAZ        | 0.931 | 0.8254 | <0.0001 |
| TOMM6      | 0.786 | 0.8255 | <0.0001 |
| PCDH17     | 0.903 | 0.8256 | <0.0001 |
| CCL20      | 0.899 | 0.8259 | <0.0001 |
| PIF1       | 0.899 | 0.826  | <0.0001 |
| ZNF793-AS1 | 0     | 0.8261 | <0.0001 |
| APIP       | 0.899 | 0.8263 | <0.0001 |
| NPM1       | 0.908 | 0.8264 | <0.0001 |
| VPS28      | 0.851 | 0.8265 | <0.0001 |
| BYSL       | 0.905 | 0.8268 | <0.0001 |
| MRM2       | 0.875 | 0.827  | 0.046   |
| PDCD6      | 0.924 | 0.8271 | <0.0001 |
| TMEM183B   | 0.897 | 0.8272 | 0.0008  |
| HIST2H4B   | 0.835 | 0.8273 | <0.0001 |
| SMG7       | 0.913 | 0.8273 | <0.0001 |
| ABCF1      | 0.914 | 0.8274 | <0.0001 |
| ATP6V1E1   | 0.923 | 0.8274 | <0.0001 |
| LINC00665  | 0.848 | 0.8275 | <0.0001 |
| DNMT3B     | 0.928 | 0.8277 | <0.0001 |
| FOCAD      | 0.745 | 0.8281 | <0.0001 |
| ALMS1      | 0.926 | 0.8282 | <0.0001 |
| HIST2H3A   | 0.861 | 0.8283 | <0.0001 |
| SEC61A1    | 0.886 | 0.8286 | <0.0001 |
| HNRNPA3P3  | 0.904 | 0.8289 | 0.01    |
| DAXX       | 0.883 | 0.8289 | <0.0001 |
| LAMA4      | 0.93  | 0.829  | <0.0001 |
| NUDCD1     | 0.849 | 0.8292 | <0.0001 |

|          |       |        |         |
|----------|-------|--------|---------|
| TACC2    | 0.88  | 0.8296 | <0.0001 |
| TSACC    | 0.856 | 0.8297 | <0.0001 |
| HNRNPUL1 | 0.909 | 0.8297 | <0.0001 |
| C17orf75 | 0.91  | 0.8301 | <0.0001 |
| ABHD4    | 0.911 | 0.8305 | <0.0001 |
| IGF2BP1  | 0.907 | 0.8307 | <0.0001 |
| AAR2     | 0.908 | 0.8307 | <0.0001 |
| MIR548D1 | 0     | 0.8313 | <0.0001 |
| ZNF219   | 0.866 | 0.8316 | <0.0001 |
| WDR70    | 0.858 | 0.8318 | <0.0001 |
| ZNF280C  | 0.942 | 0.8318 | <0.0001 |
| SLC51B   | 0.851 | 0.8319 | <0.0001 |
| IP6K1    | 0.889 | 0.8321 | <0.0001 |
| AKR1C7P  | 0.793 | 0.8322 | 0.0023  |
| UTP18    | 0.929 | 0.8328 | <0.0001 |
| FTLP2    | 0.645 | 0.8329 | 0.0068  |
| SSBP1    | 0.94  | 0.8329 | <0.0001 |
| HDAC1    | 0.866 | 0.8331 | <0.0001 |
| SUV39H2  | 0.928 | 0.8331 | <0.0001 |
| ZNF775   | 0.952 | 0.8335 | <0.0001 |
| METTL5   | 0.897 | 0.8341 | <0.0001 |
| ADAM15   | 0.915 | 0.8355 | <0.0001 |
| CNPY2    | 0.946 | 0.8356 | <0.0001 |
| PDE6D    | 0.89  | 0.8361 | <0.0001 |
| SMARCE1  | 0.917 | 0.8361 | <0.0001 |
| MEP1A    | 0.791 | 0.8363 | <0.0001 |
| RRP9     | 0.853 | 0.8363 | <0.0001 |
| DPH2     | 0.919 | 0.8364 | <0.0001 |
| ERMP1    | 0.843 | 0.8365 | <0.0001 |
| RPL23AP7 | 0.936 | 0.8365 | <0.0001 |
| COCH     | 0.841 | 0.8367 | <0.0001 |
| GTF3C2   | 0.898 | 0.8368 | <0.0001 |
| RRS1     | 0.923 | 0.8368 | <0.0001 |



|              |       |        |         |
|--------------|-------|--------|---------|
| C20orf27     | 0.852 | 0.837  | <0.0001 |
| FABP5        | 0.894 | 0.8372 | <0.0001 |
| PHF6         | 0.929 | 0.8372 | <0.0001 |
| BAG2         | 0.735 | 0.8378 | <0.0001 |
| C5orf22      | 0.884 | 0.8378 | <0.0001 |
| RFX8         | 0.754 | 0.8379 | <0.0001 |
| CS           | 0.92  | 0.8379 | <0.0001 |
| ACBD3        | 0.921 | 0.8383 | <0.0001 |
| SLC36A1      | 0.873 | 0.8384 | <0.0001 |
| MTCH1        | 0.839 | 0.8385 | <0.0001 |
| P3H4         | 0.791 | 0.8394 | 0.0013  |
| CCSAP        | 0.824 | 0.8394 | <0.0001 |
| PHPT1        | 0.858 | 0.8395 | <0.0001 |
| C19orf48     | 0.877 | 0.8395 | <0.0001 |
| PPIH         | 0.925 | 0.84   | <0.0001 |
| RFC1         | 0.926 | 0.84   | <0.0001 |
| TRAPPC2B     | 0.657 | 0.8403 | 0.0004  |
| ZNF16        | 0.901 | 0.8403 | <0.0001 |
| CUL7         | 0.847 | 0.8404 | <0.0001 |
| UBE2O        | 0.868 | 0.8411 | <0.0001 |
| SRM          | 0.885 | 0.8411 | <0.0001 |
| E2F3         | 0.896 | 0.8411 | <0.0001 |
| ISCA1P4      | 0     | 0.8413 | <0.0001 |
| CDCA7        | 0.811 | 0.8415 | <0.0001 |
| KLHL7        | 0.912 | 0.8416 | <0.0001 |
| COIL         | 0.846 | 0.8418 | <0.0001 |
| EXOSC4       | 0.826 | 0.8419 | <0.0001 |
| B3GNT5       | 0.88  | 0.8421 | <0.0001 |
| ZNF143       | 0.874 | 0.8424 | <0.0001 |
| PABPC1       | 0.926 | 0.8426 | <0.0001 |
| KIAA1614-AS1 | 0.787 | 0.8434 | <0.0001 |
| LINC01431    | 0.618 | 0.8435 | <0.0001 |
| MIEN1        | 0.864 | 0.8436 | <0.0001 |

|           |       |        |         |
|-----------|-------|--------|---------|
| ZNF792    | 0.851 | 0.8437 | <0.0001 |
| RFWD3     | 0.85  | 0.8442 | <0.0001 |
| C7orf25   | 0.975 | 0.8443 | 0.0003  |
| PPIL1     | 0.785 | 0.8443 | <0.0001 |
| NRBP1     | 0.839 | 0.8448 | <0.0001 |
| YY1AP1    | 0.892 | 0.8453 | <0.0001 |
| ASPH      | 0.899 | 0.8454 | <0.0001 |
| TPR       | 0.926 | 0.8454 | <0.0001 |
| TRIM32    | 0.835 | 0.8456 | <0.0001 |
| SMIM4     | 0.881 | 0.8462 | <0.0001 |
| NETO2     | 0.897 | 0.8464 | <0.0001 |
| CEP72     | 0.897 | 0.8466 | <0.0001 |
| HIST1H2BG | 0.852 | 0.8469 | <0.0001 |
| RPL27     | 0.893 | 0.847  | <0.0001 |
| UBR5      | 0.877 | 0.8471 | <0.0001 |
| ATAD5     | 0.935 | 0.8471 | <0.0001 |
| PIP4K2C   | 0.822 | 0.8474 | <0.0001 |
| SFR1      | 0.893 | 0.8475 | <0.0001 |
| COX6C     | 0.856 | 0.8476 | <0.0001 |
| NKIRAS2   | 0.923 | 0.8477 | <0.0001 |
| MSL3P1    | 0.812 | 0.8478 | <0.0001 |
| TOMM40    | 0.839 | 0.8478 | <0.0001 |
| NAP1L4P1  | 0.322 | 0.848  | <0.0001 |
| CENPN     | 0.853 | 0.8481 | <0.0001 |
| RNF157    | 0.736 | 0.8484 | <0.0001 |
| CCDC170   | 0.617 | 0.8485 | <0.0001 |
| EIF2AK1   | 0.894 | 0.8486 | <0.0001 |
| CHML      | 0.934 | 0.849  | <0.0001 |
| VPS33A    | 0.891 | 0.8493 | <0.0001 |
| MYO19     | 0.914 | 0.8493 | <0.0001 |
| COL4A2    | 0.867 | 0.85   | <0.0001 |
| MANF      | 0.804 | 0.8502 | <0.0001 |
| CBX4      | 0.814 | 0.8505 | <0.0001 |

|            |       |        |         |
|------------|-------|--------|---------|
| AGPAT1     | 0.904 | 0.8506 | <0.0001 |
| HNRNPA3P5  | 0.879 | 0.8508 | 0.0161  |
| KIF20B     | 0.809 | 0.8508 | <0.0001 |
| TCFL5      | 0.872 | 0.8512 | <0.0001 |
| ICK        | 0.904 | 0.8512 | <0.0001 |
| RALA       | 0.891 | 0.8522 | <0.0001 |
| ZNF142     | 0.838 | 0.8527 | <0.0001 |
| INTS3      | 0.877 | 0.8531 | <0.0001 |
| CCHCR1     | 0.922 | 0.8532 | <0.0001 |
| ABCC10     | 0.846 | 0.8533 | <0.0001 |
| NAA10      | 0.792 | 0.8541 | <0.0001 |
| SMYD5      | 0.849 | 0.8542 | <0.0001 |
| KIAA0100   | 0.869 | 0.8545 | <0.0001 |
| PEG10      | 0.839 | 0.8546 | <0.0001 |
| LMNB2      | 0.844 | 0.855  | <0.0001 |
| MUC13      | 0.823 | 0.8551 | <0.0001 |
| PLXDC1     | 0.901 | 0.8555 | <0.0001 |
| PKM        | 0.809 | 0.8561 | <0.0001 |
| APEX2      | 0.866 | 0.8562 | <0.0001 |
| COPZ1      | 0.89  | 0.8562 | <0.0001 |
| NONO       | 0.878 | 0.8563 | <0.0001 |
| RNF220     | 0.795 | 0.8564 | <0.0001 |
| PPP1R14BP2 | 0.462 | 0.8565 | <0.0001 |
| MCRIP1     | 0.272 | 0.8567 | <0.0001 |
| CLGN       | 0.874 | 0.8567 | <0.0001 |
| KIF24      | 0.944 | 0.8568 | <0.0001 |
| SLC52A2    | 0.859 | 0.8571 | <0.0001 |
| TIMM8AP1   | 0.656 | 0.8572 | 0.007   |
| DUT        | 0.882 | 0.8572 | <0.0001 |
| RBL1       | 0.914 | 0.8581 | <0.0001 |
| KIF2A      | 0.898 | 0.8583 | <0.0001 |
| TRIM59     | 0.83  | 0.8584 | <0.0001 |
| TMEM184B   | 0.841 | 0.8585 | <0.0001 |

|              |       |        |         |
|--------------|-------|--------|---------|
| PAQR4        | 0.916 | 0.8585 | <0.0001 |
| IARS         | 0.925 | 0.8587 | <0.0001 |
| GOLT1B       | 0.889 | 0.8588 | <0.0001 |
| STRBP        | 0.899 | 0.8588 | <0.0001 |
| LIG3         | 0.925 | 0.8588 | <0.0001 |
| AARS2        | 0.877 | 0.8593 | <0.0001 |
| GEMIN6       | 0.85  | 0.8602 | <0.0001 |
| CDK5RAP1     | 0.916 | 0.8606 | <0.0001 |
| INCENP       | 0.918 | 0.8608 | <0.0001 |
| DUSP9        | 0.868 | 0.861  | <0.0001 |
| OR51E1       | 0.882 | 0.8611 | <0.0001 |
| THEM4        | 0.902 | 0.8613 | <0.0001 |
| DNAJC14      | 0.908 | 0.8617 | <0.0001 |
| MAGEA1       | 0.806 | 0.8619 | <0.0001 |
| LOC400684    | 0.669 | 0.8621 | <0.0001 |
| PPIAP13      | 0     | 0.8623 | <0.0001 |
| MED24        | 0.926 | 0.8628 | <0.0001 |
| CAPG         | 0.877 | 0.8629 | <0.0001 |
| MAPT         | 0.93  | 0.863  | <0.0001 |
| MGME1        | 0.743 | 0.8631 | <0.0001 |
| MIR4482      | 0.541 | 0.8632 | 0.0127  |
| DDX49        | 0.833 | 0.8632 | <0.0001 |
| ANGEL2       | 0.905 | 0.8632 | <0.0001 |
| SCRIB        | 0.898 | 0.8635 | <0.0001 |
| COPG2        | 0.914 | 0.8638 | <0.0001 |
| TMEM79       | 0.889 | 0.8639 | <0.0001 |
| SH3BP5L      | 0.878 | 0.8641 | <0.0001 |
| RBP7         | 0.859 | 0.8642 | <0.0001 |
| WAC-AS1      | 0.963 | 0.8646 | 0.0201  |
| ZHX1-C8orf76 | 0.689 | 0.8647 | <0.0001 |
| FNBP1L       | 0.911 | 0.8647 | <0.0001 |
| LAS1L        | 0.854 | 0.8649 | <0.0001 |
| LYRM4        | 0.9   | 0.8651 | <0.0001 |

|             |       |        |         |
|-------------|-------|--------|---------|
| MESP2       | 0.952 | 0.8653 | <0.0001 |
| C17orf80    | 0.912 | 0.8654 | <0.0001 |
| LBR         | 0.935 | 0.8657 | <0.0001 |
| CYP2R1      | 0.864 | 0.8658 | <0.0001 |
| GNPDA1      | 0.858 | 0.8659 | <0.0001 |
| SEMA5B      | 0.938 | 0.8659 | <0.0001 |
| ZNF7        | 0.809 | 0.8662 | <0.0001 |
| CPQ         | 0.91  | 0.8663 | <0.0001 |
| ARFGEF3     | 0.492 | 0.8674 | <0.0001 |
| CDC25B      | 0.863 | 0.8674 | <0.0001 |
| GAPLINC     | 0.116 | 0.8676 | <0.0001 |
| FAM72B      | 0.966 | 0.8677 | 0.0017  |
| RPS21       | 0.914 | 0.8681 | <0.0001 |
| ADAR        | 0.927 | 0.8685 | <0.0001 |
| CDK7        | 0.89  | 0.8687 | <0.0001 |
| NUAK1       | 0.906 | 0.869  | <0.0001 |
| SPTAN1      | 0.918 | 0.8692 | <0.0001 |
| TM4SF19-AS1 | 0.912 | 0.8693 | 0.0382  |
| FAM199X     | 0.837 | 0.8693 | <0.0001 |
| MRPL13      | 0.868 | 0.8696 | <0.0001 |
| COMMD2      | 0.904 | 0.8701 | <0.0001 |
| UBL4A       | 0.857 | 0.8702 | <0.0001 |
| NSUN5       | 0.932 | 0.8708 | <0.0001 |
| CREB3L2     | 0.894 | 0.8712 | <0.0001 |
| CBX8        | 0.908 | 0.8725 | <0.0001 |
| DRG1        | 0.906 | 0.8726 | <0.0001 |
| CEP89       | 0.862 | 0.8727 | <0.0001 |
| TSPAN17     | 0.865 | 0.8728 | <0.0001 |
| JTB         | 0.831 | 0.8736 | <0.0001 |
| HAGLR       | 0.863 | 0.8738 | 0.0001  |
| DAD1        | 0.931 | 0.8738 | <0.0001 |
| WFS1        | 0.794 | 0.8741 | <0.0001 |
| BMI1        | 0.905 | 0.8744 | <0.0001 |

|          |       |        |         |
|----------|-------|--------|---------|
| HCG17    | 0.391 | 0.8752 | <0.0001 |
| HARS2    | 0.756 | 0.8756 | <0.0001 |
| COX7B2   | 0.687 | 0.8758 | <0.0001 |
| RPS6KC1  | 0.915 | 0.8763 | <0.0001 |
| HRCT1    | 0.805 | 0.8765 | <0.0001 |
| TBL2     | 0.845 | 0.8769 | <0.0001 |
| CCDC77   | 0.907 | 0.877  | <0.0001 |
| POLG2    | 0.892 | 0.8774 | <0.0001 |
| NIF3L1   | 0.876 | 0.8784 | <0.0001 |
| NELFCD   | 0.77  | 0.8785 | <0.0001 |
| REPIN1   | 0.923 | 0.8785 | <0.0001 |
| C14orf93 | 0.938 | 0.8786 | <0.0001 |
| KTN1-AS1 | 0.767 | 0.879  | <0.0001 |
| NMB      | 0.897 | 0.8796 | <0.0001 |
| DVL2     | 0.89  | 0.88   | <0.0001 |
| MRAP2    | 0.849 | 0.8802 | <0.0001 |
| SPON2    | 0.863 | 0.8802 | <0.0001 |
| TPD52L2  | 0.909 | 0.8802 | <0.0001 |
| CEP250   | 0.914 | 0.8804 | <0.0001 |
| TOMM34   | 0.849 | 0.8806 | <0.0001 |
| ALG1     | 0.845 | 0.8808 | <0.0001 |
| YWHAZ    | 0.914 | 0.8815 | <0.0001 |
| BZW2     | 0.871 | 0.8817 | <0.0001 |
| TMED9    | 0.868 | 0.8818 | <0.0001 |
| TCOF1    | 0.907 | 0.8818 | <0.0001 |
| SOX13    | 0.912 | 0.8825 | <0.0001 |
| MED12    | 0.864 | 0.8826 | <0.0001 |
| MRPS21   | 0.924 | 0.8828 | <0.0001 |
| ZNF251   | 0.924 | 0.8833 | <0.0001 |
| JMJD4    | 0.905 | 0.8835 | <0.0001 |
| LRRC1    | 0.926 | 0.8839 | <0.0001 |
| HES6     | 0.915 | 0.8841 | <0.0001 |
| PHYHIPL  | 0.805 | 0.8844 | <0.0001 |

|          |       |        |         |
|----------|-------|--------|---------|
| DOLK     | 0.911 | 0.8845 | <0.0001 |
| PFDN4    | 0.921 | 0.8845 | <0.0001 |
| ARF1     | 0.952 | 0.8847 | <0.0001 |
| RNF20    | 0.891 | 0.8854 | <0.0001 |
| ATP2A2   | 0.911 | 0.8854 | <0.0001 |
| EIF2B1   | 0.85  | 0.8855 | <0.0001 |
| RBBP5    | 0.905 | 0.8857 | <0.0001 |
| PIGM     | 0.882 | 0.8864 | <0.0001 |
| CAPRN1   | 0.926 | 0.8872 | <0.0001 |
| ESPL1    | 0.791 | 0.8874 | <0.0001 |
| HM13     | 0.894 | 0.8876 | <0.0001 |
| PPIA     | 0.916 | 0.8876 | <0.0001 |
| MCAM     | 0.866 | 0.8887 | <0.0001 |
| TIPRL    | 0.922 | 0.8888 | <0.0001 |
| RPL7P26  | 0.802 | 0.889  | 0.0018  |
| ANKRD39  | 0.891 | 0.8892 | <0.0001 |
| FBXO45   | 0.912 | 0.8892 | <0.0001 |
| RNFT2    | 0.858 | 0.8895 | <0.0001 |
| ALG6     | 0.872 | 0.8895 | <0.0001 |
| COX6B1   | 0.896 | 0.8895 | <0.0001 |
| FBXL18   | 0.906 | 0.89   | <0.0001 |
| FIBP     | 0.888 | 0.8902 | <0.0001 |
| EDC3     | 0.915 | 0.8907 | <0.0001 |
| TAX1BP1  | 0.917 | 0.8907 | <0.0001 |
| HIST1H4H | 0.856 | 0.8913 | <0.0001 |
| PPIB     | 0.903 | 0.8913 | <0.0001 |
| MANBAL   | 0.908 | 0.8914 | <0.0001 |
| UBAP2    | 0.817 | 0.8921 | <0.0001 |
| PPME1    | 0.82  | 0.8924 | <0.0001 |
| VMA21    | 0.865 | 0.8924 | <0.0001 |
| PXN-AS1  | 0.764 | 0.8936 | <0.0001 |
| TMEM68   | 0.86  | 0.8939 | <0.0001 |
| GTF2E1   | 0.865 | 0.8939 | <0.0001 |

|              |       |        |         |
|--------------|-------|--------|---------|
| EIF3H        | 0.895 | 0.8941 | <0.0001 |
| MPC2         | 0.911 | 0.8942 | <0.0001 |
| SRP9P1       | 0.144 | 0.8949 | <0.0001 |
| CLIC1        | 0.92  | 0.8949 | <0.0001 |
| ABCF2        | 0.905 | 0.8954 | <0.0001 |
| CCT2         | 0.876 | 0.8965 | <0.0001 |
| TMEM69       | 0.856 | 0.8967 | <0.0001 |
| ZFP62        | 0.919 | 0.8969 | <0.0001 |
| UCHL5        | 0.861 | 0.8975 | <0.0001 |
| ISX          | 0.779 | 0.8978 | <0.0001 |
| CALU         | 0.897 | 0.8984 | <0.0001 |
| UBE2Z        | 0.881 | 0.8988 | <0.0001 |
| AGO2         | 0.889 | 0.8989 | <0.0001 |
| TRIM39-RPP21 | 0.209 | 0.899  | <0.0001 |
| FAM122B      | 0.852 | 0.899  | <0.0001 |
| ARF4-AS1     | 0     | 0.8991 | <0.0001 |
| DCLRE1B      | 0.917 | 0.8991 | <0.0001 |
| OTUB2        | 0.913 | 0.8996 | <0.0001 |
| ENSA         | 0.898 | 0.8997 | <0.0001 |
| TCEA1P2      | 0.688 | 0.8999 | 0.0067  |
| RALBP1       | 0.877 | 0.8999 | <0.0001 |
| ABHD12       | 0.929 | 0.8999 | <0.0001 |
| GSTA4        | 0.846 | 0.9011 | <0.0001 |
| H2AFV        | 0.88  | 0.9013 | <0.0001 |
| CCDC137      | 0.852 | 0.9015 | <0.0001 |
| PSMB5        | 0.889 | 0.9017 | <0.0001 |
| PDZD11       | 0.951 | 0.9018 | <0.0001 |
| MIR4435-2HG  | 0.901 | 0.9019 | 0.0406  |
| HMGXB3       | 0.895 | 0.902  | <0.0001 |
| QARS         | 0.835 | 0.9021 | <0.0001 |
| TULP3        | 0.847 | 0.9022 | <0.0001 |
| TIGD5        | 0.934 | 0.9028 | <0.0001 |
| ALG3         | 0.895 | 0.9033 | <0.0001 |



|             |       |        |         |
|-------------|-------|--------|---------|
| PRMT3       | 0.908 | 0.9035 | <0.0001 |
| CCDC86      | 0.913 | 0.9038 | <0.0001 |
| SOWAHA      | 0.837 | 0.9041 | <0.0001 |
| GTPBP4      | 0.914 | 0.9051 | <0.0001 |
| CLN6        | 0.843 | 0.9057 | <0.0001 |
| RUVBL2      | 0.885 | 0.9063 | <0.0001 |
| SUPT16H     | 0.894 | 0.9063 | <0.0001 |
| COG5        | 0.928 | 0.9063 | <0.0001 |
| PCAT6       | 0.646 | 0.9064 | <0.0001 |
| HEATR6      | 0.892 | 0.9068 | <0.0001 |
| CASC9       | 0     | 0.9069 | <0.0001 |
| YKT6        | 0.899 | 0.9071 | <0.0001 |
| TMEM81      | 0.883 | 0.9081 | <0.0001 |
| FKBP1C      | 0.592 | 0.9082 | <0.0001 |
| ZNF692      | 0.935 | 0.9082 | <0.0001 |
| GMFB        | 0.924 | 0.9083 | <0.0001 |
| BOLA2       | 0.966 | 0.9083 | <0.0001 |
| ARFGEF2     | 0.932 | 0.9086 | <0.0001 |
| IFT52       | 0.92  | 0.9096 | <0.0001 |
| PLXNC1      | 0.861 | 0.9098 | <0.0001 |
| KPNB1       | 0.876 | 0.9101 | <0.0001 |
| CPSF6       | 0.934 | 0.9108 | <0.0001 |
| EEF2KMT     | 0.549 | 0.911  | <0.0001 |
| RGS5        | 0.921 | 0.911  | <0.0001 |
| PPIAL4A     | 0.811 | 0.9113 | <0.0001 |
| PRKAR2A-AS1 | 0.917 | 0.9122 | 0.0254  |
| MARS        | 0.869 | 0.9122 | <0.0001 |
| LUCAT1      | 0.799 | 0.9126 | 0.0058  |
| ABCC5       | 0.902 | 0.9127 | <0.0001 |
| EPS8L3      | 0.893 | 0.913  | <0.0001 |
| CAD         | 0.917 | 0.9132 | <0.0001 |
| ITPKA       | 0.821 | 0.9141 | <0.0001 |
| AP3M2       | 0.917 | 0.9143 | <0.0001 |

|               |       |        |         |
|---------------|-------|--------|---------|
| CUTA          | 0.931 | 0.9144 | <0.0001 |
| G6PD          | 0.888 | 0.9145 | <0.0001 |
| ZNF559-ZNF177 | 0.288 | 0.915  | <0.0001 |
| NOTCH3        | 0.859 | 0.9156 | <0.0001 |
| SUB1          | 0.932 | 0.9158 | <0.0001 |
| BOLA1         | 0.848 | 0.916  | <0.0001 |
| AGBL5         | 0.924 | 0.9162 | <0.0001 |
| C5orf51       | 0.893 | 0.9163 | <0.0001 |
| PRR34-AS1     | 0.772 | 0.9166 | <0.0001 |
| LRP11         | 0.844 | 0.9168 | <0.0001 |
| DESI2         | 0.833 | 0.9174 | <0.0001 |
| ZFP41         | 0.883 | 0.9177 | <0.0001 |
| PLCE1         | 0.876 | 0.9178 | <0.0001 |
| TCHP          | 0.864 | 0.9181 | <0.0001 |
| PEX11B        | 0.919 | 0.9181 | <0.0001 |
| TMEM74        | 0.772 | 0.9188 | <0.0001 |
| PUS7          | 0.907 | 0.9188 | <0.0001 |
| PYCARD-AS1    | 0     | 0.919  | <0.0001 |
| CFL1          | 0.917 | 0.9194 | <0.0001 |
| MAF1          | 0.809 | 0.9196 | <0.0001 |
| WDR45B        | 0.88  | 0.9197 | <0.0001 |
| ZSCAN9        | 0.869 | 0.9199 | <0.0001 |
| CYHR1         | 0.903 | 0.9201 | <0.0001 |
| SLC4A1AP      | 0.875 | 0.9204 | <0.0001 |
| SUPT4H1       | 0.913 | 0.9204 | <0.0001 |
| SSR1          | 0.908 | 0.9207 | <0.0001 |
| EBF1          | 0.837 | 0.9214 | <0.0001 |
| CYC1          | 0.815 | 0.9215 | <0.0001 |
| LMNA          | 0.941 | 0.9217 | <0.0001 |
| DNAJC6        | 0.956 | 0.9217 | <0.0001 |
| C17orf53      | 0.937 | 0.9222 | <0.0001 |
| COPS5         | 0.895 | 0.9225 | <0.0001 |
| DDOST         | 0.876 | 0.924  | <0.0001 |

|            |       |        |         |
|------------|-------|--------|---------|
| PPP1CC     | 0.911 | 0.9253 | <0.0001 |
| ANXA2P2    | 0.959 | 0.9253 | <0.0001 |
| NAA40      | 0.927 | 0.9256 | <0.0001 |
| PIR        | 0.878 | 0.9261 | <0.0001 |
| FANCE      | 0.891 | 0.9265 | <0.0001 |
| TBCB       | 0.853 | 0.9271 | <0.0001 |
| ZNF572     | 0.864 | 0.9274 | <0.0001 |
| EIF3B      | 0.92  | 0.9275 | <0.0001 |
| HSPA14     | 0.885 | 0.9277 | <0.0001 |
| WDR12      | 0.882 | 0.9278 | <0.0001 |
| HIST2H2BC  | 0.857 | 0.9281 | <0.0001 |
| LINC01186  | 0.93  | 0.9282 | 0.001   |
| RRP15      | 0.89  | 0.9285 | <0.0001 |
| PDCD5      | 0.893 | 0.9285 | <0.0001 |
| ANXA2R     | 0.92  | 0.9285 | <0.0001 |
| C4orf46    | 0.872 | 0.9286 | <0.0001 |
| RPL30      | 0.919 | 0.9286 | <0.0001 |
| STC2       | 0.873 | 0.9292 | <0.0001 |
| PSMC2      | 0.886 | 0.9298 | <0.0001 |
| ZNF528-AS1 | 0     | 0.9299 | <0.0001 |
| DNMT1      | 0.853 | 0.9302 | <0.0001 |
| CCT7       | 0.909 | 0.9306 | <0.0001 |
| KNOP1      | 0.927 | 0.9309 | <0.0001 |
| NSF        | 0.946 | 0.9311 | <0.0001 |
| SENP1      | 0.875 | 0.9322 | <0.0001 |
| PPP2R5A    | 0.905 | 0.9325 | <0.0001 |
| RNF26      | 0.87  | 0.9328 | <0.0001 |
| FTH1P8     | 0.68  | 0.9341 | 0.0044  |
| SERPINI1   | 0.892 | 0.9342 | <0.0001 |
| GAS2L3     | 0.87  | 0.9343 | <0.0001 |
| NDUFB9     | 0.845 | 0.9359 | <0.0001 |
| VAT1       | 0.845 | 0.9359 | <0.0001 |
| MRGBP      | 0.858 | 0.9361 | <0.0001 |

|          |       |        |         |
|----------|-------|--------|---------|
| TMCO3    | 0.832 | 0.9369 | <0.0001 |
| TUBB     | 0.924 | 0.9376 | <0.0001 |
| MIR6835  | 0.02  | 0.9377 | <0.0001 |
| RPAP1    | 0.882 | 0.9377 | <0.0001 |
| AVL9     | 0.883 | 0.938  | <0.0001 |
| TONSL    | 0.917 | 0.9383 | <0.0001 |
| SLBP     | 0.903 | 0.9386 | <0.0001 |
| USP21    | 0.923 | 0.9386 | <0.0001 |
| YWHAH    | 0.892 | 0.9389 | <0.0001 |
| SAAL1    | 0.9   | 0.9392 | <0.0001 |
| UHRF1    | 0.926 | 0.9394 | <0.0001 |
| TAGLN2   | 0.889 | 0.9405 | <0.0001 |
| MPV17    | 0.857 | 0.9413 | <0.0001 |
| PHBP11   | 0.777 | 0.9415 | 0.0356  |
| TSNAX    | 0.912 | 0.9416 | <0.0001 |
| RALY-AS1 | 0.397 | 0.9419 | <0.0001 |
| ZNF623   | 0.917 | 0.9419 | <0.0001 |
| TRMT12   | 0.848 | 0.942  | <0.0001 |
| ILF3     | 0.913 | 0.9421 | <0.0001 |
| SEMA3F   | 0.917 | 0.9422 | <0.0001 |
| BRMS1    | 0.91  | 0.9427 | <0.0001 |
| DYNC1H1  | 0.915 | 0.9429 | <0.0001 |
| PPP1R35  | 0.901 | 0.9432 | <0.0001 |
| TRIP4    | 0.901 | 0.9434 | <0.0001 |
| TMEM258  | 0.858 | 0.9435 | <0.0001 |
| BSG      | 0.894 | 0.9436 | <0.0001 |
| SOGA1    | 0.954 | 0.945  | <0.0001 |
| RAD54B   | 0.923 | 0.9453 | <0.0001 |
| NDUFA4L2 | 0.833 | 0.9454 | <0.0001 |
| CHAF1B   | 0.886 | 0.9455 | <0.0001 |
| OTUD6B   | 0.895 | 0.9457 | <0.0001 |
| LIG1     | 0.861 | 0.946  | <0.0001 |
| PSMB3    | 0.877 | 0.9463 | <0.0001 |

|            |       |        |         |
|------------|-------|--------|---------|
| BOLA2B     | 0.922 | 0.9464 | <0.0001 |
| NOX4       | 0.852 | 0.9465 | <0.0001 |
| SMARCAL1   | 0.897 | 0.9467 | <0.0001 |
| NCAPD2P1   | 0.377 | 0.9468 | <0.0001 |
| RUSC1      | 0.904 | 0.9469 | <0.0001 |
| RAD18      | 0.918 | 0.9472 | <0.0001 |
| NHP2       | 0.906 | 0.9473 | <0.0001 |
| RNF187     | 0.916 | 0.9474 | <0.0001 |
| SLC1A4     | 0.861 | 0.9477 | <0.0001 |
| TYMSOS     | 0.951 | 0.9478 | 0.0025  |
| CYB5R1     | 0.821 | 0.9481 | <0.0001 |
| TAF2       | 0.901 | 0.9483 | <0.0001 |
| CTHRC1     | 0.893 | 0.9488 | <0.0001 |
| PFDN6      | 0.909 | 0.9498 | <0.0001 |
| STT3A      | 0.863 | 0.9499 | <0.0001 |
| DNAJC9     | 0.894 | 0.9499 | <0.0001 |
| PRPF6      | 0.913 | 0.9503 | <0.0001 |
| R3HDM1     | 0.916 | 0.9505 | <0.0001 |
| DBF4       | 0.939 | 0.9519 | <0.0001 |
| OLFML2A    | 0.899 | 0.952  | <0.0001 |
| TMEM199    | 0.846 | 0.953  | <0.0001 |
| TM4SF1-AS1 | 0.133 | 0.9532 | <0.0001 |
| ADCK2      | 0.87  | 0.9532 | <0.0001 |
| FANCF      | 0.918 | 0.9537 | <0.0001 |
| ZFP64      | 0.935 | 0.9538 | <0.0001 |
| HSPA4      | 0.92  | 0.9546 | <0.0001 |
| COLCA2     | 0.814 | 0.9549 | <0.0001 |
| CCDC107    | 0.906 | 0.9552 | <0.0001 |
| XPO1       | 0.908 | 0.9554 | <0.0001 |
| SAYSD1     | 0.89  | 0.9557 | <0.0001 |
| DDX11-AS1  | 0.961 | 0.9558 | 0.0055  |
| TP53BP2    | 0.937 | 0.9558 | <0.0001 |
| SASS6      | 0.922 | 0.9559 | <0.0001 |

|           |       |        |         |
|-----------|-------|--------|---------|
| RAB3B     | 0.884 | 0.956  | <0.0001 |
| RPL8      | 0.922 | 0.956  | <0.0001 |
| SUZ12     | 0.924 | 0.9565 | <0.0001 |
| C6orf89   | 0.863 | 0.9566 | <0.0001 |
| HYI-AS1   | 0.879 | 0.9569 | 0.0367  |
| C1orf74   | 0.828 | 0.9571 | <0.0001 |
| MAP4K4    | 0.913 | 0.9578 | <0.0001 |
| DKC1      | 0.888 | 0.958  | <0.0001 |
| SNHG6     | 0.769 | 0.9586 | <0.0001 |
| PDCD2L    | 0.798 | 0.9587 | <0.0001 |
| CCT5      | 0.946 | 0.9587 | <0.0001 |
| POLR2G    | 0.887 | 0.9592 | <0.0001 |
| CNOT10    | 0.879 | 0.9594 | <0.0001 |
| DROSHA    | 0.877 | 0.9603 | <0.0001 |
| PIGT      | 0.943 | 0.9603 | <0.0001 |
| LINC01224 | 0.234 | 0.9605 | <0.0001 |
| NAT9      | 0.921 | 0.9608 | <0.0001 |
| ORMDL2    | 0.905 | 0.9609 | <0.0001 |
| SLC9A6    | 0.933 | 0.961  | <0.0001 |
| SLC25A43  | 0.916 | 0.9615 | <0.0001 |
| DEDD      | 0.924 | 0.9616 | <0.0001 |
| CANX      | 0.924 | 0.962  | <0.0001 |
| BCAT2     | 0.88  | 0.9628 | <0.0001 |
| GPATCH4   | 0.943 | 0.9632 | <0.0001 |
| EME1      | 0.934 | 0.964  | <0.0001 |
| ADSL      | 0.869 | 0.9641 | <0.0001 |
| CWC27     | 0.887 | 0.9643 | <0.0001 |
| PARP2     | 0.927 | 0.9643 | <0.0001 |
| SH3PXD2B  | 0.818 | 0.9648 | <0.0001 |
| GORASP2   | 0.837 | 0.9649 | <0.0001 |
| MTHFD1L   | 0.93  | 0.965  | <0.0001 |
| CHTOP     | 0.751 | 0.9653 | <0.0001 |
| RUVBL1    | 0.907 | 0.966  | <0.0001 |

|           |       |        |         |
|-----------|-------|--------|---------|
| NENF      | 0.901 | 0.9661 | <0.0001 |
| ACACA     | 0.94  | 0.9662 | <0.0001 |
| TRIM37    | 0.924 | 0.9663 | <0.0001 |
| HMGA1     | 0.936 | 0.9665 | <0.0001 |
| ZBTB41    | 0.893 | 0.9667 | <0.0001 |
| SNORD86   | 0     | 0.9671 | 0.0002  |
| LPGAT1    | 0.929 | 0.9674 | <0.0001 |
| C1orf35   | 0.916 | 0.9681 | <0.0001 |
| SPSB2     | 0.905 | 0.9682 | <0.0001 |
| SRPK1     | 0.846 | 0.9683 | <0.0001 |
| HIST1H2AM | 0.89  | 0.9685 | <0.0001 |
| ESCO2     | 0.929 | 0.9685 | <0.0001 |
| CSNK2B    | 0.93  | 0.9685 | <0.0001 |
| HDAC11    | 0.94  | 0.9686 | <0.0001 |
| CNOT6     | 0.852 | 0.9691 | <0.0001 |
| ELOVL1    | 0.887 | 0.9691 | <0.0001 |
| SLC35F6   | 0.932 | 0.9692 | <0.0001 |
| ITGB3BP   | 0.893 | 0.9694 | <0.0001 |
| WDR62     | 0.905 | 0.9698 | <0.0001 |
| OSBPL3    | 0.905 | 0.9701 | <0.0001 |
| SNRPD1    | 0.924 | 0.9703 | <0.0001 |
| VSIG10    | 0.829 | 0.9706 | <0.0001 |
| S100A10   | 0.909 | 0.9708 | <0.0001 |
| BOLA3     | 0.919 | 0.971  | <0.0001 |
| FTLP12    | 0.71  | 0.9723 | 0.0126  |
| NT5DC2    | 0.814 | 0.973  | <0.0001 |
| TRIM28    | 0.808 | 0.9731 | <0.0001 |
| LINC01419 | 0.042 | 0.9733 | <0.0001 |
| TOMM20    | 0.921 | 0.9742 | <0.0001 |
| TMEM206   | 0.847 | 0.975  | <0.0001 |
| PDIA3P1   | 0.545 | 0.9754 | 0.0055  |
| BROX      | 0.909 | 0.9757 | <0.0001 |
| COMMD5    | 0.928 | 0.9757 | <0.0001 |

|              |       |        |         |
|--------------|-------|--------|---------|
| GGPS1        | 0.93  | 0.9765 | <0.0001 |
| HAX1         | 0.925 | 0.9767 | <0.0001 |
| LOC100289561 | 0.435 | 0.977  | <0.0001 |
| IMPDH2       | 0.849 | 0.9771 | <0.0001 |
| MIR4737      | 0.656 | 0.9776 | <0.0001 |
| CDC123       | 0.862 | 0.9776 | <0.0001 |
| ZNF544       | 0.903 | 0.9777 | <0.0001 |
| STRIP2       | 0.801 | 0.9789 | <0.0001 |
| TRIM24       | 0.908 | 0.9794 | <0.0001 |
| ANXA2        | 0.925 | 0.9795 | <0.0001 |
| TSEN15       | 0.89  | 0.9799 | <0.0001 |
| LYSMD1       | 0.892 | 0.98   | <0.0001 |
| RBM34        | 0.948 | 0.9805 | <0.0001 |
| LOC100506100 | 0.322 | 0.9808 | <0.0001 |
| SMARCC1      | 0.857 | 0.9808 | <0.0001 |
| PTCD1        | 0.953 | 0.9812 | <0.0001 |
| TUBA1C       | 0.828 | 0.9821 | <0.0001 |
| BUB3         | 0.901 | 0.9826 | <0.0001 |
| PDRG1        | 0.816 | 0.9829 | <0.0001 |
| FTSJ3        | 0.847 | 0.9829 | <0.0001 |
| MCMDC2       | 0.911 | 0.9836 | <0.0001 |
| ARPC5        | 0.924 | 0.9836 | <0.0001 |
| SLC35B2      | 0.902 | 0.9837 | <0.0001 |
| MRPS23       | 0.911 | 0.984  | <0.0001 |
| CPD          | 0.892 | 0.9845 | <0.0001 |
| AKR1B15      | 0.813 | 0.9846 | <0.0001 |
| AACS         | 0.854 | 0.9851 | <0.0001 |
| PAXIP1       | 0.885 | 0.9854 | <0.0001 |
| GM2A         | 0.918 | 0.9854 | <0.0001 |
| CASK         | 0.898 | 0.9856 | <0.0001 |
| SHC1         | 0.894 | 0.9857 | <0.0001 |
| METTL18      | 0.847 | 0.986  | <0.0001 |
| SND1         | 0.883 | 0.9866 | <0.0001 |



|              |       |        |         |
|--------------|-------|--------|---------|
| SHARPIN      | 0.906 | 0.9869 | <0.0001 |
| LOC100288637 | 0.874 | 0.987  | 0.0174  |
| TRIM52-AS1   | 0.852 | 0.987  | <0.0001 |
| FAM72A       | 0.93  | 0.9878 | <0.0001 |
| RALY         | 0.912 | 0.9879 | <0.0001 |
| LINC01535    | 0.186 | 0.988  | <0.0001 |
| GTPBP2       | 0.91  | 0.9889 | <0.0001 |
| CHD1L        | 0.908 | 0.989  | <0.0001 |
| BPGM         | 0.919 | 0.9891 | <0.0001 |
| EIF4A3       | 0.895 | 0.9902 | <0.0001 |
| CSTB         | 0.918 | 0.9911 | <0.0001 |
| GINS4        | 0.839 | 0.9915 | <0.0001 |
| B3GALNT2     | 0.895 | 0.9915 | <0.0001 |
| RBM12B       | 0.915 | 0.9921 | <0.0001 |
| MFSD5        | 0.911 | 0.9928 | <0.0001 |
| RPN2         | 0.932 | 0.9931 | <0.0001 |
| GNS          | 0.917 | 0.9932 | <0.0001 |
| HEY1         | 0.892 | 0.9934 | <0.0001 |
| GABRD        | 0.954 | 0.9939 | <0.0001 |
| NOL7         | 0.921 | 0.9941 | <0.0001 |
| VBP1         | 0.925 | 0.9944 | <0.0001 |
| SRXN1        | 0.972 | 0.9944 | <0.0001 |
| CCT4         | 0.903 | 0.9947 | <0.0001 |
| SUV39H1      | 0.86  | 0.9948 | <0.0001 |
| H2AFY        | 0.926 | 0.9952 | <0.0001 |
| KIF18B       | 0.93  | 0.9955 | <0.0001 |
| BOP1         | 0.877 | 0.9956 | <0.0001 |
| ZBTB9        | 0.893 | 0.9962 | <0.0001 |
| TGM3         | 0.858 | 0.9968 | <0.0001 |
| LPL          | 0.916 | 0.997  | <0.0001 |
| CDCA4        | 0.925 | 0.9971 | <0.0001 |
| TMEM104      | 0.886 | 0.9975 | <0.0001 |
| TRAF2        | 0.886 | 0.9984 | <0.0001 |

|           |       |        |         |
|-----------|-------|--------|---------|
| ACSL4     | 0.917 | 0.9987 | <0.0001 |
| DUS4L     | 0.907 | 0.9989 | <0.0001 |
| ARHGEF11  | 0.909 | 0.999  | <0.0001 |
| POLD1     | 0.859 | 0.9994 | <0.0001 |
| PSMD11    | 0.871 | 1.0001 | <0.0001 |
| SPAG5     | 0.877 | 1.0001 | <0.0001 |
| BORA      | 0.736 | 1.0002 | <0.0001 |
| XPOT      | 0.912 | 1.0002 | <0.0001 |
| CTNNA1    | 0.926 | 1.0003 | <0.0001 |
| RRP36     | 0.746 | 1.0005 | <0.0001 |
| CDC7      | 0.889 | 1.001  | <0.0001 |
| NUP107    | 0.918 | 1.0033 | <0.0001 |
| CNOT11    | 0.901 | 1.0036 | <0.0001 |
| EMC2      | 0.896 | 1.004  | <0.0001 |
| SNAPIN    | 0.875 | 1.0041 | <0.0001 |
| EEF1A1P19 | 0.65  | 1.0058 | 0.0013  |
| LRRC42    | 0.829 | 1.0058 | <0.0001 |
| FAM222A   | 0.915 | 1.0062 | <0.0001 |
| C17orf58  | 0.913 | 1.0065 | <0.0001 |
| SESTD1    | 0.868 | 1.0066 | <0.0001 |
| C1orf43   | 0.914 | 1.0067 | <0.0001 |
| SMC2      | 0.924 | 1.0071 | <0.0001 |
| PLCB1     | 0.898 | 1.0077 | <0.0001 |
| GNAZ      | 0.908 | 1.0077 | <0.0001 |
| NPC1      | 0.88  | 1.0084 | <0.0001 |
| RBM42     | 0.9   | 1.0086 | <0.0001 |
| NAA20     | 0.826 | 1.0088 | <0.0001 |
| NTPCR     | 0.848 | 1.0104 | <0.0001 |
| TRMT6     | 0.88  | 1.0105 | <0.0001 |
| ELOB      | 0.806 | 1.0108 | 0.0039  |
| POC1A     | 0.814 | 1.011  | <0.0001 |
| UBE2A     | 0.924 | 1.011  | <0.0001 |
| MTX1      | 0.937 | 1.0125 | <0.0001 |

|                 |       |        |         |
|-----------------|-------|--------|---------|
| H2AFX           | 0.879 | 1.0139 | <0.0001 |
| WDHD1           | 0.935 | 1.0141 | <0.0001 |
| SORT1           | 0.864 | 1.0145 | <0.0001 |
| CLN3            | 0.94  | 1.0145 | <0.0001 |
| SULT1C2         | 0.864 | 1.0156 | <0.0001 |
| PHOSPHO2-KLHL23 | 0.618 | 1.0157 | 0.001   |
| E2F2            | 0.932 | 1.0158 | <0.0001 |
| UBQLN4          | 0.952 | 1.0162 | <0.0001 |
| RN7SL751P       | 0.474 | 1.0163 | <0.0001 |
| RAD51           | 0.949 | 1.0164 | <0.0001 |
| TMEM9           | 0.85  | 1.0167 | <0.0001 |
| LAPTM4B         | 0.887 | 1.0174 | <0.0001 |
| CDC25A          | 0.884 | 1.0177 | <0.0001 |
| PPM1G           | 0.909 | 1.0177 | <0.0001 |
| TBC1D31         | 0.916 | 1.0182 | <0.0001 |
| MRPL24          | 0.912 | 1.0195 | <0.0001 |
| YWHAZP3         | 0.783 | 1.0198 | <0.0001 |
| PSMD1           | 0.867 | 1.02   | <0.0001 |
| CACYBP          | 0.918 | 1.0203 | <0.0001 |
| ORC6            | 0.886 | 1.0205 | <0.0001 |
| ANO10           | 0.867 | 1.0212 | <0.0001 |
| SSRP1           | 0.889 | 1.0212 | <0.0001 |
| RBM24           | 0.889 | 1.0214 | <0.0001 |
| ZFP69B          | 0.906 | 1.0215 | <0.0001 |
| PSMD10          | 0.927 | 1.0217 | <0.0001 |
| ZNF318          | 0.938 | 1.0219 | <0.0001 |
| NCOA6           | 0.911 | 1.0222 | <0.0001 |
| MCM10           | 0.911 | 1.0233 | <0.0001 |
| RAB11FIP4       | 0.896 | 1.0235 | <0.0001 |
| NPLOC4          | 0.93  | 1.0238 | <0.0001 |
| SBF2-AS1        | 0.964 | 1.0246 | 0.0078  |
| GINS3           | 0.821 | 1.0252 | <0.0001 |
| ATIC            | 0.849 | 1.0258 | <0.0001 |

|            |       |        |         |
|------------|-------|--------|---------|
| SQSTM1     | 0.872 | 1.0267 | <0.0001 |
| HCG25      | 0.874 | 1.0269 | 0.0035  |
| ERCC6L     | 0.94  | 1.0269 | <0.0001 |
| TMEM267    | 0.865 | 1.027  | 0.0309  |
| HIST1H3H   | 0.91  | 1.0273 | <0.0001 |
| CENPQ      | 0.898 | 1.0286 | <0.0001 |
| SAP130     | 0.914 | 1.0291 | <0.0001 |
| PRR11      | 0.94  | 1.0295 | <0.0001 |
| MYO5C      | 0.895 | 1.0298 | <0.0001 |
| IPO9       | 0.904 | 1.0302 | <0.0001 |
| GPR158     | 0.937 | 1.0315 | <0.0001 |
| ZNF561-AS1 | 0.404 | 1.0322 | <0.0001 |
| MORC2      | 0.858 | 1.0329 | <0.0001 |
| SNRPD2     | 0.928 | 1.033  | <0.0001 |
| DCAF13     | 0.863 | 1.0336 | <0.0001 |
| RMI1       | 0.929 | 1.0341 | <0.0001 |
| B4GALT3    | 0.885 | 1.0342 | <0.0001 |
| SNRPA      | 0.874 | 1.0345 | <0.0001 |
| NARF       | 0.901 | 1.0352 | <0.0001 |
| LMNB1      | 0.872 | 1.0355 | <0.0001 |
| ZNF322     | 0.913 | 1.0356 | <0.0001 |
| YEATS2     | 0.869 | 1.0372 | <0.0001 |
| PIAS3      | 0.917 | 1.0372 | <0.0001 |
| IGSF3      | 0.907 | 1.038  | <0.0001 |
| PI4KB      | 0.866 | 1.0383 | <0.0001 |
| TRIM45     | 0.872 | 1.0384 | <0.0001 |
| SMARCA4    | 0.893 | 1.0387 | <0.0001 |
| TOMM40L    | 0.93  | 1.0394 | <0.0001 |
| RAC1P2     | 0.952 | 1.0407 | 0.0151  |
| RABIF      | 0.945 | 1.0409 | <0.0001 |
| CEP295     | 0.823 | 1.041  | 0.0007  |
| TUFT1      | 0.857 | 1.041  | <0.0001 |
| FAM96AP2   | 0     | 1.0415 | <0.0001 |

|            |       |        |         |
|------------|-------|--------|---------|
| EHMT2      | 0.956 | 1.042  | <0.0001 |
| HMGB2      | 0.915 | 1.0424 | <0.0001 |
| MPZL1      | 0.888 | 1.0446 | <0.0001 |
| ARMC1      | 0.915 | 1.0457 | <0.0001 |
| DDX41      | 0.831 | 1.0458 | <0.0001 |
| NUP62      | 0.929 | 1.0462 | <0.0001 |
| CPSF4      | 0.929 | 1.0463 | <0.0001 |
| ITGB1BP1   | 0.915 | 1.0464 | <0.0001 |
| CKAP4      | 0.871 | 1.0485 | <0.0001 |
| HEATR1     | 0.926 | 1.0485 | <0.0001 |
| MZT1       | 0.885 | 1.0487 | <0.0001 |
| PSMD14     | 0.919 | 1.049  | <0.0001 |
| NUDT1      | 0.95  | 1.0491 | <0.0001 |
| GTF2IRD1   | 0.885 | 1.0499 | <0.0001 |
| CCDC97     | 0.854 | 1.0502 | <0.0001 |
| TIPIN      | 0.815 | 1.0507 | <0.0001 |
| XPR1       | 0.931 | 1.0512 | <0.0001 |
| CEP41      | 0.928 | 1.0517 | <0.0001 |
| POLE2      | 0.871 | 1.0522 | <0.0001 |
| ANAPC7     | 0.911 | 1.0535 | <0.0001 |
| ACTL6A     | 0.899 | 1.0549 | <0.0001 |
| TMEM147    | 0.847 | 1.055  | <0.0001 |
| CDKN2AIPNL | 0.955 | 1.055  | <0.0001 |
| TMEM237    | 0.817 | 1.0553 | <0.0001 |
| TOPBP1     | 0.909 | 1.0553 | <0.0001 |
| CD109      | 0.817 | 1.0554 | <0.0001 |
| TPGS2      | 0.872 | 1.0555 | <0.0001 |
| MCRS1      | 0.918 | 1.0559 | <0.0001 |
| INTS7      | 0.91  | 1.0566 | <0.0001 |
| SLC50A1    | 0.765 | 1.0567 | <0.0001 |
| STXBP6     | 0.914 | 1.0573 | <0.0001 |
| MTA3       | 0.838 | 1.0584 | <0.0001 |
| ZBED8      | 0.839 | 1.0589 | <0.0001 |

|           |       |        |         |
|-----------|-------|--------|---------|
| PODXL     | 0.93  | 1.0595 | <0.0001 |
| PUF60     | 0.84  | 1.0606 | <0.0001 |
| BARD1     | 0.883 | 1.0611 | <0.0001 |
| HIGD1B    | 0.951 | 1.0615 | <0.0001 |
| LRRC14    | 0.859 | 1.0621 | <0.0001 |
| FIGNL1    | 0.932 | 1.0621 | <0.0001 |
| HLTF      | 0.917 | 1.0626 | <0.0001 |
| DLG5      | 0.91  | 1.0627 | <0.0001 |
| TBC1D7    | 0.886 | 1.064  | <0.0001 |
| CDPF1     | 0.437 | 1.0643 | <0.0001 |
| DYNLRB1   | 0.949 | 1.0658 | <0.0001 |
| LASP1     | 0.842 | 1.0668 | <0.0001 |
| CEP131    | 0.929 | 1.0668 | <0.0001 |
| LINC01389 | 0.344 | 1.067  | <0.0001 |
| AZIN1-AS1 | 0     | 1.0675 | <0.0001 |
| FBXO43    | 0.929 | 1.0678 | <0.0001 |
| KIAA1522  | 0.881 | 1.0681 | <0.0001 |
| RBBP7     | 0.915 | 1.0688 | <0.0001 |
| RIC8A     | 0.873 | 1.0689 | <0.0001 |
| SFN       | 0.815 | 1.0696 | <0.0001 |
| TTF2      | 0.884 | 1.0697 | <0.0001 |
| MYBL2     | 0.946 | 1.072  | <0.0001 |
| CETN2     | 0.857 | 1.0729 | <0.0001 |
| ZNF687    | 0.9   | 1.0731 | <0.0001 |
| LSM2      | 0.899 | 1.0732 | <0.0001 |
| HMGN4     | 0.914 | 1.0732 | <0.0001 |
| ZWILCH    | 0.918 | 1.0734 | <0.0001 |
| SLC41A3   | 0.939 | 1.0745 | <0.0001 |
| DYNLL1    | 0.918 | 1.0748 | <0.0001 |
| NRAS      | 0.919 | 1.0748 | <0.0001 |
| MMS22L    | 0.847 | 1.075  | <0.0001 |
| STX6      | 0.923 | 1.0754 | <0.0001 |
| BUD31     | 0.927 | 1.0758 | <0.0001 |

|            |       |        |         |
|------------|-------|--------|---------|
| THBS4      | 0.898 | 1.0766 | <0.0001 |
| TTL        | 0.863 | 1.0769 | <0.0001 |
| DNAAF5     | 0.803 | 1.0773 | 0.0005  |
| TRIM11     | 0.865 | 1.0782 | <0.0001 |
| PAFAH1B3   | 0.843 | 1.0789 | <0.0001 |
| AKIP1      | 0.91  | 1.0794 | <0.0001 |
| RAD51C     | 0.912 | 1.0798 | <0.0001 |
| HNRNPA1P21 | 0.565 | 1.0799 | <0.0001 |
| TUBA1B     | 0.894 | 1.08   | <0.0001 |
| CENPH      | 0.956 | 1.0802 | <0.0001 |
| OLFML2B    | 0.909 | 1.0807 | <0.0001 |
| ZNF252P    | 0.902 | 1.0809 | <0.0001 |
| PSMC4      | 0.898 | 1.0826 | <0.0001 |
| VRK1       | 0.912 | 1.0826 | <0.0001 |
| FANCD2     | 0.931 | 1.0842 | <0.0001 |
| ANKRD27    | 0.925 | 1.0843 | <0.0001 |
| DIAPH3     | 0.949 | 1.0853 | <0.0001 |
| SLC7A11    | 0.815 | 1.0857 | <0.0001 |
| RECQL4     | 0.9   | 1.0859 | <0.0001 |
| MMP11      | 0.897 | 1.0862 | <0.0001 |
| PTK2       | 0.905 | 1.0868 | <0.0001 |
| MIS18A     | 0.802 | 1.0879 | <0.0001 |
| HAGLROS    | 0.979 | 1.0894 | 0.0251  |
| COMMD4     | 0.919 | 1.0899 | <0.0001 |
| GLMP       | 0.908 | 1.0901 | 0.0062  |
| PARP1      | 0.883 | 1.0908 | <0.0001 |
| GINS2      | 0.854 | 1.0918 | <0.0001 |
| NVL        | 0.928 | 1.0922 | <0.0001 |
| SHCBP1     | 0.925 | 1.0928 | <0.0001 |
| SLC26A2    | 0.902 | 1.0931 | <0.0001 |
| APLN       | 0.906 | 1.0935 | <0.0001 |
| HOXA13     | 0.839 | 1.0946 | <0.0001 |
| ZKSCAN3    | 0.876 | 1.095  | <0.0001 |

|         |       |        |         |
|---------|-------|--------|---------|
| ZKSCAN5 | 0.918 | 1.0956 | <0.0001 |
| TMEM38B | 0.912 | 1.0958 | <0.0001 |
| WDR76   | 0.897 | 1.0984 | <0.0001 |
| PYCR2   | 0.818 | 1.1008 | <0.0001 |
| DDX39A  | 0.827 | 1.1008 | <0.0001 |
| TMEM209 | 0.911 | 1.1017 | <0.0001 |
| CELSR3  | 0.861 | 1.102  | <0.0001 |
| RMI2    | 0.916 | 1.102  | <0.0001 |
| PYGB    | 0.87  | 1.1033 | <0.0001 |
| KLHL23  | 0.845 | 1.1034 | <0.0001 |
| BLM     | 0.863 | 1.1039 | <0.0001 |
| DHX57   | 0.966 | 1.104  | <0.0001 |
| FDPS    | 0.922 | 1.1042 | <0.0001 |
| COPA    | 0.924 | 1.1042 | <0.0001 |
| CCNE1   | 0.904 | 1.1043 | <0.0001 |
| AKR1B10 | 0.752 | 1.1045 | <0.0001 |
| SMG5    | 0.878 | 1.1046 | <0.0001 |
| GLA     | 0.873 | 1.1051 | <0.0001 |
| RAD54L  | 0.893 | 1.1054 | <0.0001 |
| ALYREF  | 0.885 | 1.1056 | <0.0001 |
| POLR3C  | 0.883 | 1.1058 | <0.0001 |
| COPS6   | 0.9   | 1.1066 | <0.0001 |
| HGS     | 0.905 | 1.1092 | <0.0001 |
| TMEM101 | 0.927 | 1.1095 | <0.0001 |
| NDRG3   | 0.911 | 1.11   | <0.0001 |
| WDYHV1  | 0.836 | 1.1109 | <0.0001 |
| NDC1    | 0.883 | 1.1111 | <0.0001 |
| PSPH    | 0.91  | 1.1111 | <0.0001 |
| FAM83H  | 0.759 | 1.1116 | <0.0001 |
| LARP1   | 0.924 | 1.1116 | <0.0001 |
| RAP2A   | 0.904 | 1.1119 | <0.0001 |
| UXS1    | 0.921 | 1.1129 | <0.0001 |
| GARS    | 0.91  | 1.1131 | <0.0001 |



|          |       |        |         |
|----------|-------|--------|---------|
| RRAGD    | 0.868 | 1.1144 | <0.0001 |
| ZSWIM5   | 0.839 | 1.1145 | <0.0001 |
| FAM50A   | 0.864 | 1.1151 | <0.0001 |
| NEIL3    | 0.907 | 1.1153 | <0.0001 |
| LARS     | 0.935 | 1.1159 | <0.0001 |
| TIMELESS | 0.895 | 1.1163 | <0.0001 |
| CANT1    | 0.863 | 1.1166 | <0.0001 |
| CDT1     | 0.918 | 1.1199 | <0.0001 |
| COL4A1   | 0.921 | 1.1203 | <0.0001 |
| CDK5     | 0.882 | 1.1218 | <0.0001 |
| DEPDC1B  | 0.919 | 1.1218 | <0.0001 |
| RAD21    | 0.899 | 1.1234 | <0.0001 |
| XRCC1    | 0.94  | 1.1241 | <0.0001 |
| TXNRD1   | 0.924 | 1.1242 | <0.0001 |
| DGKZP1   | 0     | 1.1248 | <0.0001 |
| DUXAP10  | 0.898 | 1.1249 | <0.0001 |
| DNAJB11  | 0.86  | 1.1252 | <0.0001 |
| CKS2     | 0.923 | 1.1258 | <0.0001 |
| E2F1     | 0.939 | 1.1263 | <0.0001 |
| CDC23    | 0.905 | 1.1265 | <0.0001 |
| POLA1    | 0.901 | 1.1273 | <0.0001 |
| SP2-AS1  | 0.222 | 1.1281 | <0.0001 |
| POLA2    | 0.865 | 1.1286 | <0.0001 |
| ALG1L    | 0.884 | 1.1289 | <0.0001 |
| SLC38A6  | 0.918 | 1.1289 | <0.0001 |
| ISG20L2  | 0.862 | 1.1292 | <0.0001 |
| FBL      | 0.883 | 1.1299 | <0.0001 |
| NCSTN    | 0.899 | 1.1312 | <0.0001 |
| PLK4     | 0.888 | 1.1315 | <0.0001 |
| SNF8     | 0.907 | 1.1322 | <0.0001 |
| NUP133   | 0.919 | 1.1341 | <0.0001 |
| CBX1     | 0.897 | 1.1346 | <0.0001 |
| PTMAP5   | 0     | 1.1354 | <0.0001 |

|             |       |        |         |
|-------------|-------|--------|---------|
| CDK4        | 0.88  | 1.1356 | <0.0001 |
| CKAP5       | 0.961 | 1.1379 | <0.0001 |
| ST8SIA6-AS1 | 0.68  | 1.1383 | <0.0001 |
| ARHGAP11A   | 0.953 | 1.1387 | <0.0001 |
| H2AFZ       | 0.869 | 1.1389 | <0.0001 |
| MTBP        | 0.944 | 1.1392 | <0.0001 |
| TCF19       | 0.934 | 1.1422 | <0.0001 |
| GBAP1       | 0.91  | 1.1431 | <0.0001 |
| CPSF3       | 0.907 | 1.1439 | <0.0001 |
| UBE2S       | 0.886 | 1.144  | <0.0001 |
| DCTN2       | 0.916 | 1.1446 | <0.0001 |
| TYMS        | 0.91  | 1.1457 | <0.0001 |
| FAM111B     | 0.928 | 1.1495 | <0.0001 |
| RFXANK      | 0.934 | 1.1507 | <0.0001 |
| CCNF        | 0.908 | 1.1511 | <0.0001 |
| C8orf76     | 0.935 | 1.1528 | <0.0001 |
| EFNA4       | 0.923 | 1.156  | <0.0001 |
| POGK        | 0.82  | 1.1571 | <0.0001 |
| LSM4        | 0.825 | 1.1572 | <0.0001 |
| NUP205      | 0.919 | 1.1576 | <0.0001 |
| RFC3        | 0.929 | 1.1608 | <0.0001 |
| TTC13       | 0.927 | 1.161  | <0.0001 |
| LOC341056   | 0.446 | 1.1622 | <0.0001 |
| LAGE3       | 0.929 | 1.1632 | <0.0001 |
| SLC39A1     | 0.875 | 1.1637 | <0.0001 |
| DUSP12      | 0.888 | 1.1645 | <0.0001 |
| SNRPE       | 0.948 | 1.1649 | <0.0001 |
| DTYMK       | 0.947 | 1.166  | <0.0001 |
| DSN1        | 0.879 | 1.1666 | <0.0001 |
| NUP155      | 0.942 | 1.1668 | <0.0001 |
| XPO5        | 0.842 | 1.1674 | <0.0001 |
| MCM8        | 0.955 | 1.1679 | <0.0001 |
| PIGU        | 0.921 | 1.1682 | <0.0001 |

|            |       |        |         |
|------------|-------|--------|---------|
| TBC1D16    | 0.88  | 1.1686 | <0.0001 |
| FANCG      | 0.843 | 1.1691 | <0.0001 |
| FAM72C     | 0.885 | 1.1691 | <0.0001 |
| PSMD2      | 0.893 | 1.1692 | <0.0001 |
| PCNA       | 0.927 | 1.1702 | <0.0001 |
| RCN2       | 0.916 | 1.1707 | <0.0001 |
| CASC3      | 0.919 | 1.1708 | <0.0001 |
| CDKN2B-AS1 | 0.961 | 1.1713 | 0.0005  |
| CSE1L      | 0.94  | 1.1726 | <0.0001 |
| TRAIP      | 0.928 | 1.1731 | <0.0001 |
| TMCO1      | 0.927 | 1.1736 | <0.0001 |
| NCAPH      | 0.945 | 1.1749 | <0.0001 |
| ZIC2       | 0.88  | 1.1756 | <0.0001 |
| PPOX       | 0.906 | 1.1756 | <0.0001 |
| NABP2      | 0.875 | 1.176  | <0.0001 |
| C15orf41   | 0.912 | 1.1763 | <0.0001 |
| BCL9       | 0.895 | 1.1773 | <0.0001 |
| CKS1B      | 0.923 | 1.1774 | <0.0001 |
| ROBO1      | 0.908 | 1.1781 | <0.0001 |
| INTS8      | 0.891 | 1.1824 | <0.0001 |
| E2F7       | 0.89  | 1.1828 | <0.0001 |
| CDKN2A     | 0.922 | 1.1829 | <0.0001 |
| ASF1B      | 0.925 | 1.1831 | <0.0001 |
| TAF6       | 0.93  | 1.1834 | <0.0001 |
| SPRTN      | 0.698 | 1.1856 | <0.0001 |
| ATP6V1F    | 0.917 | 1.1856 | <0.0001 |
| CCT6A      | 0.926 | 1.1856 | <0.0001 |
| NCAPD2     | 0.858 | 1.1859 | <0.0001 |
| UBE2Q1     | 0.907 | 1.1859 | <0.0001 |
| TP53I3     | 0.857 | 1.186  | <0.0001 |
| DEPDC1     | 0.939 | 1.1861 | <0.0001 |
| MSTO1      | 0.938 | 1.1869 | <0.0001 |
| AATF       | 0.906 | 1.1874 | <0.0001 |

|           |       |        |         |
|-----------|-------|--------|---------|
| HELLS     | 0.93  | 1.1874 | <0.0001 |
| POLR2K    | 0.914 | 1.1881 | <0.0001 |
| MED20     | 0.863 | 1.189  | <0.0001 |
| P4HA2     | 0.911 | 1.1897 | <0.0001 |
| PRIM1     | 0.926 | 1.1897 | <0.0001 |
| PLK1      | 0.944 | 1.1898 | <0.0001 |
| PRIM2     | 0.95  | 1.1898 | <0.0001 |
| NECAB3    | 0.786 | 1.1919 | <0.0001 |
| AP3B1     | 0.931 | 1.1947 | <0.0001 |
| C5orf34   | 0.945 | 1.1968 | <0.0001 |
| DDIAS     | 0.661 | 1.197  | <0.0001 |
| BAALC-AS1 | 0     | 1.1971 | <0.0001 |
| MCM5      | 0.927 | 1.1972 | <0.0001 |
| ARPC1A    | 0.876 | 1.1974 | <0.0001 |
| ALG1L9P   | 0.837 | 1.2012 | 0.0002  |
| TDRKH     | 0.919 | 1.2022 | <0.0001 |
| IGF2BP3   | 0.834 | 1.2033 | <0.0001 |
| SNRPB     | 0.933 | 1.2035 | <0.0001 |
| ORC1      | 0.888 | 1.2042 | <0.0001 |
| KNTC1     | 0.866 | 1.2043 | <0.0001 |
| UBD       | 0.916 | 1.2046 | <0.0001 |
| TKT       | 0.791 | 1.2059 | <0.0001 |
| LIN9      | 0.933 | 1.2076 | <0.0001 |
| POLQ      | 0.9   | 1.2083 | <0.0001 |
| CENPI     | 0.95  | 1.2094 | <0.0001 |
| PSME3     | 0.931 | 1.2103 | <0.0001 |
| EIF2D     | 0.899 | 1.211  | <0.0001 |
| USP39     | 0.905 | 1.2112 | <0.0001 |
| PSMG3     | 0.87  | 1.2131 | <0.0001 |
| ATP6V1C1  | 0.914 | 1.2149 | <0.0001 |
| GTSE1     | 0.89  | 1.215  | <0.0001 |
| SKA2P1    | 0     | 1.2152 | <0.0001 |
| GOLPH3L   | 0.893 | 1.2164 | <0.0001 |

|           |       |        |         |
|-----------|-------|--------|---------|
| CENPK     | 0.883 | 1.2165 | <0.0001 |
| BCAP31    | 0.88  | 1.2174 | <0.0001 |
| ARHGAP11B | 0.905 | 1.2196 | <0.0001 |
| HSPB1P1   | 0.864 | 1.22   | 0.0192  |
| C8orf33   | 0.923 | 1.2218 | <0.0001 |
| C1orf112  | 0.828 | 1.2223 | <0.0001 |
| KLHL12    | 0.943 | 1.2233 | <0.0001 |
| GRPEL2    | 0.878 | 1.2247 | <0.0001 |
| EFTUD2    | 0.914 | 1.2259 | <0.0001 |
| CHEK1     | 0.876 | 1.2268 | <0.0001 |
| PRKDC     | 0.928 | 1.2284 | <0.0001 |
| TLCD1     | 0.824 | 1.2286 | <0.0001 |
| CCNE2     | 0.908 | 1.2286 | <0.0001 |
| FAM20B    | 0.917 | 1.2317 | <0.0001 |
| IRAK1     | 0.904 | 1.2343 | <0.0001 |
| THY1      | 0.917 | 1.2359 | <0.0001 |
| GPAA1     | 0.869 | 1.2366 | <0.0001 |
| CRSP8P    | 0.563 | 1.2388 | 0.0062  |
| MKLN1-AS  | 0.801 | 1.2406 | 0.0144  |
| PPIAL4F   | 0.852 | 1.2406 | 0.0253  |
| RFX5      | 0.928 | 1.241  | <0.0001 |
| SPINK1    | 0.877 | 1.2436 | <0.0001 |
| TICRR     | 0.948 | 1.2448 | <0.0001 |
| NME1      | 0.932 | 1.2456 | <0.0001 |
| RNU6-481P | 0.902 | 1.247  | 0.0018  |
| KIF15     | 0.898 | 1.2474 | <0.0001 |
| CENPA     | 0.956 | 1.2479 | <0.0001 |
| CKAP2     | 0.946 | 1.251  | <0.0001 |
| MEMO1P1   | 0.786 | 1.252  | <0.0001 |
| MEA1      | 0.938 | 1.252  | <0.0001 |
| UFC1      | 0.911 | 1.2532 | <0.0001 |
| CSTF2     | 0.867 | 1.2566 | <0.0001 |
| STIP1     | 0.89  | 1.2577 | <0.0001 |

|            |       |        |         |
|------------|-------|--------|---------|
| CDC6       | 0.927 | 1.2609 | <0.0001 |
| LAMC1      | 0.895 | 1.263  | <0.0001 |
| SAC3D1     | 0.932 | 1.2641 | <0.0001 |
| SNRPC      | 0.948 | 1.2659 | <0.0001 |
| MTFR2      | 0.875 | 1.2681 | <0.0001 |
| TACC3      | 0.886 | 1.2713 | <0.0001 |
| KIF18A     | 0.934 | 1.273  | <0.0001 |
| SMC4       | 0.94  | 1.2738 | <0.0001 |
| ATP2A1-AS1 | 0     | 1.2746 | <0.0001 |
| CENPL      | 0.936 | 1.2749 | <0.0001 |
| COG2       | 0.902 | 1.2794 | <0.0001 |
| HSPB1      | 0.878 | 1.281  | <0.0001 |
| CRNDE      | 0.621 | 1.2813 | <0.0001 |
| RRM1       | 0.915 | 1.2854 | <0.0001 |
| DARS2      | 0.902 | 1.2858 | <0.0001 |
| ACBD6      | 0.873 | 1.2884 | <0.0001 |
| NELFE      | 0.918 | 1.2907 | <0.0001 |
| SF3B4      | 0.917 | 1.2915 | <0.0001 |
| CENPM      | 0.93  | 1.2921 | <0.0001 |
| ATP6AP1    | 0.896 | 1.2935 | <0.0001 |
| CDCA2      | 0.886 | 1.2971 | <0.0001 |
| UQCC2      | 0.94  | 1.2986 | <0.0001 |
| RAD51AP1   | 0.899 | 1.2996 | <0.0001 |
| KNSTRN     | 0.772 | 1.3036 | <0.0001 |
| CDKN2C     | 0.953 | 1.3089 | <0.0001 |
| MIR7111    | 0.285 | 1.3104 | <0.0001 |
| TK1        | 0.895 | 1.3121 | <0.0001 |
| HSP90AB1   | 0.904 | 1.314  | <0.0001 |
| CNIH4      | 0.933 | 1.3143 | <0.0001 |
| TROAP      | 0.916 | 1.3152 | <0.0001 |
| SPC24      | 0.95  | 1.3162 | <0.0001 |
| GNPAT      | 0.891 | 1.3173 | <0.0001 |
| CCDC34     | 0.935 | 1.3177 | <0.0001 |

|           |       |        |         |
|-----------|-------|--------|---------|
| AKR1C3    | 0.883 | 1.3185 | <0.0001 |
| ARHGEF39  | 0.809 | 1.3225 | <0.0001 |
| SLC25A39  | 0.891 | 1.3237 | <0.0001 |
| PYGO2     | 0.911 | 1.3276 | <0.0001 |
| FAM72D    | 0.884 | 1.3278 | <0.0001 |
| RHNO1     | 0.934 | 1.3288 | <0.0001 |
| LGTN      | 0.887 | 1.3306 | <0.0001 |
| SNX25P1   | 0.509 | 1.331  | <0.0001 |
| SMYD3     | 0.82  | 1.3313 | <0.0001 |
| MRPL9     | 0.931 | 1.3315 | <0.0001 |
| MCM7      | 0.91  | 1.3323 | <0.0001 |
| UBR5-AS1  | 0     | 1.3327 | <0.0001 |
| CHAF1A    | 0.878 | 1.3332 | <0.0001 |
| CENPE     | 0.916 | 1.3332 | <0.0001 |
| E2F8      | 0.935 | 1.3336 | <0.0001 |
| PLOD3     | 0.895 | 1.3351 | <0.0001 |
| GMPS      | 0.921 | 1.3352 | <0.0001 |
| GPSM2     | 0.914 | 1.3382 | <0.0001 |
| FLAD1     | 0.913 | 1.3464 | <0.0001 |
| TARBP1    | 0.89  | 1.3484 | <0.0001 |
| LINC01607 | 0.041 | 1.3526 | <0.0001 |
| KRTCAP2   | 0.962 | 1.3528 | <0.0001 |
| SNX27     | 0.911 | 1.353  | <0.0001 |
| NCAPG2    | 0.914 | 1.3541 | <0.0001 |
| TUBG1     | 0.921 | 1.3554 | <0.0001 |
| CMSS1     | 0.696 | 1.3558 | <0.0001 |
| ATAD2     | 0.888 | 1.356  | <0.0001 |
| OIP5      | 0.912 | 1.3562 | <0.0001 |
| MCM4      | 0.912 | 1.3569 | <0.0001 |
| NR2C2AP   | 0.929 | 1.3578 | <0.0001 |
| SPC25     | 0.943 | 1.359  | <0.0001 |
| SQLE      | 0.915 | 1.3593 | <0.0001 |
| SPDL1     | 0.908 | 1.3605 | <0.0001 |

|            |       |        |         |
|------------|-------|--------|---------|
| SKA1       | 0.921 | 1.3611 | <0.0001 |
| ACLY       | 0.932 | 1.3663 | <0.0001 |
| NUP37      | 0.925 | 1.3674 | <0.0001 |
| CTSA       | 0.904 | 1.3689 | <0.0001 |
| SCNM1      | 0.93  | 1.3716 | <0.0001 |
| PIGC       | 0.946 | 1.3718 | <0.0001 |
| CDH13      | 0.934 | 1.3727 | <0.0001 |
| TOB2P1     | 0.718 | 1.3743 | <0.0001 |
| SETDB1     | 0.872 | 1.3747 | <0.0001 |
| SSR2       | 0.923 | 1.3758 | <0.0001 |
| DAP3       | 0.932 | 1.3786 | <0.0001 |
| MDK        | 0.948 | 1.379  | <0.0001 |
| ZNF529-AS1 | 0.371 | 1.3793 | <0.0001 |
| FEN1       | 0.927 | 1.3798 | <0.0001 |
| EXO1       | 0.931 | 1.3799 | <0.0001 |
| PSMD4      | 0.957 | 1.3799 | <0.0001 |
| FANCI      | 0.894 | 1.3808 | <0.0001 |
| CENPU      | 0.885 | 1.3824 | <0.0001 |
| DSCC1      | 0.896 | 1.3824 | <0.0001 |
| PRCC       | 0.937 | 1.3826 | <0.0001 |
| EPRS       | 0.924 | 1.3843 | <0.0001 |
| KIF2C      | 0.911 | 1.3854 | <0.0001 |
| STMN1      | 0.951 | 1.3865 | <0.0001 |
| UBAP2L     | 0.897 | 1.3887 | <0.0001 |
| NEU1       | 0.94  | 1.3916 | <0.0001 |
| PEA15      | 0.917 | 1.3929 | <0.0001 |
| FAM189B    | 0.883 | 1.3931 | <0.0001 |
| VPS45      | 0.887 | 1.3938 | <0.0001 |
| MAD2L1     | 0.92  | 1.4013 | <0.0001 |
| CDCA3      | 0.903 | 1.4026 | <0.0001 |
| TBCE       | 0.929 | 1.4032 | <0.0001 |
| ENAH       | 0.94  | 1.4058 | <0.0001 |
| FALEC      | 0.777 | 1.4089 | 0.0353  |



|          |       |        |         |
|----------|-------|--------|---------|
| SPATS2   | 0.926 | 1.4177 | <0.0001 |
| MCM2     | 0.899 | 1.4189 | <0.0001 |
| ITGA6    | 0.954 | 1.4201 | <0.0001 |
| PARPBP   | 0.936 | 1.4232 | <0.0001 |
| AURKB    | 0.87  | 1.4239 | <0.0001 |
| MND1     | 0.933 | 1.4248 | <0.0001 |
| GINS1    | 0.969 | 1.4293 | <0.0001 |
| KIFC1    | 0.942 | 1.435  | <0.0001 |
| MCM6     | 0.91  | 1.4425 | <0.0001 |
| TRIP13   | 0.897 | 1.447  | <0.0001 |
| SKA3     | 0.924 | 1.4471 | <0.0001 |
| PSMB4    | 0.928 | 1.4477 | <0.0001 |
| COL15A1  | 0.884 | 1.4496 | <0.0001 |
| IQGAP3   | 0.965 | 1.4502 | <0.0001 |
| KIF11    | 0.936 | 1.4515 | <0.0001 |
| STIL     | 0.89  | 1.4524 | <0.0001 |
| SLC26A6  | 0.979 | 1.4538 | <0.0001 |
| CEP55    | 0.902 | 1.4555 | <0.0001 |
| CDC45    | 0.892 | 1.4574 | <0.0001 |
| MCM3     | 0.931 | 1.4595 | <0.0001 |
| CD34     | 0.954 | 1.4598 | <0.0001 |
| KPNA2    | 0.93  | 1.4658 | <0.0001 |
| CDC25C   | 0.942 | 1.4665 | <0.0001 |
| RPL37P6  | 0.228 | 1.467  | <0.0001 |
| COA6     | 0.955 | 1.47   | <0.0001 |
| NAXE     | 0.935 | 1.4757 | 0.017   |
| PTMAP4   | 0.956 | 1.4762 | 0.0148  |
| TMEM106C | 0.889 | 1.4768 | <0.0001 |
| RNASEH2A | 0.913 | 1.4789 | <0.0001 |
| SAE1     | 0.896 | 1.479  | <0.0001 |
| GMNN     | 0.933 | 1.4813 | <0.0001 |
| KIF23    | 0.945 | 1.4824 | <0.0001 |
| WASHC5   | 0.87  | 1.485  | 0.0013  |

|         |       |        |         |
|---------|-------|--------|---------|
| GBA     | 0.945 | 1.5003 | <0.0001 |
| EZH2    | 0.935 | 1.5008 | <0.0001 |
| CENPW   | 0.885 | 1.5087 | <0.0001 |
| SCAMP3  | 0.944 | 1.5139 | <0.0001 |
| ILF2    | 0.909 | 1.5141 | <0.0001 |
| ESM1    | 0.932 | 1.5182 | <0.0001 |
| NUF2    | 0.946 | 1.5258 | <0.0001 |
| FLVCR1  | 0.931 | 1.5295 | <0.0001 |
| DUXAP8  | 0.835 | 1.5341 | 0.0084  |
| ECT2    | 0.905 | 1.5385 | <0.0001 |
| MSH2    | 0.937 | 1.5444 | <0.0001 |
| CKAP2L  | 0.892 | 1.5445 | <0.0001 |
| RFC4    | 0.936 | 1.5452 | <0.0001 |
| VPS72   | 0.936 | 1.5475 | <0.0001 |
| BUB1B   | 0.946 | 1.5591 | <0.0001 |
| MKI67   | 0.913 | 1.5617 | <0.0001 |
| FOXM1   | 0.934 | 1.5623 | <0.0001 |
| ZWINT   | 0.94  | 1.5658 | <0.0001 |
| NSMCE2  | 0.927 | 1.5798 | <0.0001 |
| KIF14   | 0.914 | 1.5883 | <0.0001 |
| SUCO    | 0.832 | 1.5919 | <0.0001 |
| UCK2    | 0.9   | 1.5945 | <0.0001 |
| CDCA5   | 0.936 | 1.5957 | <0.0001 |
| BIRC5   | 0.941 | 1.6    | <0.0001 |
| NCAPG   | 0.924 | 1.6105 | <0.0001 |
| FAM83D  | 0.896 | 1.6136 | <0.0001 |
| BUB1    | 0.925 | 1.6155 | <0.0001 |
| CDC20   | 0.914 | 1.6168 | <0.0001 |
| TTK     | 0.927 | 1.6174 | <0.0001 |
| GPC3    | 0.878 | 1.6219 | <0.0001 |
| FAM220A | 0.892 | 1.623  | <0.0001 |
| CCT3    | 0.945 | 1.6271 | <0.0001 |
| RRM2    | 0.927 | 1.6284 | <0.0001 |

|         |       |        |         |
|---------|-------|--------|---------|
| DTL     | 0.935 | 1.6299 | <0.0001 |
| DLGAP5  | 0.908 | 1.6368 | <0.0001 |
| TPX2    | 0.889 | 1.6401 | <0.0001 |
| KIF4A   | 0.928 | 1.6493 | <0.0001 |
| CCNA2   | 0.891 | 1.6503 | <0.0001 |
| SGO2    | 0.932 | 1.6569 | 0.0218  |
| AURKA   | 0.934 | 1.6604 | <0.0001 |
| CDCA8   | 0.942 | 1.662  | <0.0001 |
| HMMR    | 0.933 | 1.667  | <0.0001 |
| HJURP   | 0.874 | 1.6683 | <0.0001 |
| MTX1P1  | 0.863 | 1.6788 | 0.0041  |
| NDC80   | 0.934 | 1.6865 | <0.0001 |
| NUSAP1  | 0.938 | 1.6945 | <0.0001 |
| PBK     | 0.923 | 1.6962 | <0.0001 |
| UBE2C   | 0.95  | 1.7169 | <0.0001 |
| NEK2    | 0.938 | 1.7416 | <0.0001 |
| MELK    | 0.936 | 1.7589 | <0.0001 |
| ANLN    | 0.927 | 1.7832 | <0.0001 |
| PLVAP   | 0.945 | 1.7945 | <0.0001 |
| RACGAP1 | 0.955 | 1.805  | <0.0001 |
| CDK1    | 0.906 | 1.8241 | <0.0001 |
| CCNB1   | 0.928 | 1.8349 | <0.0001 |
| PCLAF   | 0.824 | 1.8417 | <0.0001 |
| KIF20A  | 0.928 | 1.8775 | <0.0001 |
| CDKN3   | 0.937 | 1.8807 | <0.0001 |
| CAP2    | 0.934 | 1.8825 | <0.0001 |
| CCNB2   | 0.918 | 1.8997 | <0.0001 |
| CENPF   | 0.929 | 1.9091 | <0.0001 |
| UBE2T   | 0.931 | 1.9725 | <0.0001 |
| PTTG1   | 0.941 | 1.9949 | <0.0001 |
| ASPM    | 0.928 | 1.9955 | <0.0001 |
| TOP2A   | 0.934 | 2.0243 | <0.0001 |
| PRC1    | 0.936 | 2.0325 | <0.0001 |

|           |       |         |         |
|-----------|-------|---------|---------|
| CLEC4G    | 0.958 | -2.6249 | <0.0001 |
| CLEC1B    | 0.961 | -2.5665 | <0.0001 |
| CLEC4M    | 0.972 | -2.5216 | <0.0001 |
| STAB2     | 0.962 | -2.4901 | <0.0001 |
| FCN3      | 0.958 | -2.4891 | <0.0001 |
| FCN2      | 0.974 | -2.4017 | <0.0001 |
| CXCL14    | 0.968 | -2.3785 | <0.0001 |
| OIT3      | 0.959 | -2.3652 | <0.0001 |
| COLEC10   | 0.938 | -2.2931 | <0.0001 |
| CRHBP     | 0.952 | -2.2919 | <0.0001 |
| LINC01093 | 0.757 | -2.2136 | <0.0001 |
| VIPR1     | 0.96  | -2.1945 | <0.0001 |
| ECM1      | 0.972 | -2.1839 | <0.0001 |
| HHIP      | 0.943 | -2.142  | <0.0001 |
| PTH1R     | 0.948 | -2.1067 | <0.0001 |
| RSPO3     | 0.952 | -2.0913 | <0.0001 |
| MARCO     | 0.966 | -2.09   | <0.0001 |
| CFP       | 0.968 | -2.0455 | <0.0001 |
| CCBE1     | 0.973 | -2.0336 | <0.0001 |
| BMPER     | 0.974 | -1.9623 | <0.0001 |
| DBH       | 0.96  | -1.9587 | <0.0001 |
| HAND2-AS1 | 0.954 | -1.9347 | <0.0001 |
| ANGPTL6   | 0.94  | -1.9179 | <0.0001 |
| LYVE1     | 0.929 | -1.8681 | <0.0001 |
| CYP1A2    | 0.939 | -1.8667 | <0.0001 |
| PLAC8     | 0.954 | -1.8197 | <0.0001 |
| DNASE1L3  | 0.961 | -1.816  | <0.0001 |
| CXCL12    | 0.957 | -1.8081 | <0.0001 |
| KBTBD11   | 0.891 | -1.7878 | <0.0001 |
| HAMP      | 0.923 | -1.7693 | <0.0001 |
| GPM6A     | 0.97  | -1.7656 | <0.0001 |
| ADAMTS13  | 0.973 | -1.7556 | <0.0001 |
| LIFR      | 0.965 | -1.7517 | <0.0001 |

|             |       |         |         |
|-------------|-------|---------|---------|
| CETP        | 0.961 | -1.7459 | <0.0001 |
| LINC01612   | 0     | -1.7322 | <0.0001 |
| AADAT       | 0.869 | -1.7206 | <0.0001 |
| LRAT        | 0.923 | -1.7192 | <0.0001 |
| CNDP1       | 0.917 | -1.6744 | <0.0001 |
| CYP39A1     | 0.907 | -1.6646 | <0.0001 |
| NAT2        | 0.964 | -1.662  | <0.0001 |
| LCAT        | 0.954 | -1.6477 | <0.0001 |
| MT1M        | 0.913 | -1.647  | <0.0001 |
| GDF2        | 0.97  | -1.64   | <0.0001 |
| ADRA1A      | 0.941 | -1.6389 | <0.0001 |
| IGFALS      | 0.937 | -1.6297 | <0.0001 |
| KBTBD11-OT1 | 0.084 | -1.6237 | <0.0001 |
| RND3        | 0.949 | -1.6147 | <0.0001 |
| TTC36       | 0.802 | -1.6023 | <0.0001 |
| CHST4       | 0.928 | -1.597  | <0.0001 |
| NPY1R       | 0.957 | -1.5903 | <0.0001 |
| APOF        | 0.896 | -1.5798 | <0.0001 |
| ANKRD55     | 0.934 | -1.5796 | <0.0001 |
| SRPX        | 0.955 | -1.5753 | <0.0001 |
| MT1F        | 0.948 | -1.5672 | <0.0001 |
| NTF3        | 0.962 | -1.5665 | <0.0001 |
| ESR1        | 0.963 | -1.5643 | <0.0001 |
| CDHR2       | 0.898 | -1.5633 | <0.0001 |
| MFSD2A      | 0.841 | -1.5625 | <0.0001 |
| ASS1P2      | 0.329 | -1.5543 | <0.0001 |
| SRD5A1P1    | 0.926 | -1.5534 | 0.0085  |
| SYT9        | 0.925 | -1.5411 | <0.0001 |
| CPEB3       | 0.893 | -1.5367 | <0.0001 |
| INMT        | 0.911 | -1.5346 | <0.0001 |
| LILRB5      | 0.903 | -1.5292 | <0.0001 |
| DPT         | 0.938 | -1.5258 | <0.0001 |
| NDST3       | 0.915 | -1.5249 | <0.0001 |

|          |       |         |         |
|----------|-------|---------|---------|
| TBXA2R   | 0.962 | -1.5234 | <0.0001 |
| KCNN2    | 0.932 | -1.5225 | <0.0001 |
| ITLN1    | 0.895 | -1.5213 | <0.0001 |
| NXF3     | 0.939 | -1.5191 | <0.0001 |
| CD5L     | 0.94  | -1.5111 | <0.0001 |
| FAM180A  | 0.93  | -1.5098 | <0.0001 |
| HHIP-AS1 | 0.955 | -1.5059 | <0.0001 |
| C7       | 0.935 | -1.4976 | <0.0001 |
| SLC25A47 | 0.805 | -1.4921 | <0.0001 |
| EHD3     | 0.928 | -1.4911 | <0.0001 |
| KAZN     | 0.914 | -1.4891 | <0.0001 |
| TIMD4    | 0.9   | -1.4863 | <0.0001 |
| STEAP4   | 0.923 | -1.4852 | <0.0001 |
| MAN1C1   | 0.891 | -1.4841 | <0.0001 |
| RCAN1    | 0.913 | -1.4764 | <0.0001 |
| PAMR1    | 0.919 | -1.4723 | <0.0001 |
| ASPA     | 0.902 | -1.4708 | <0.0001 |
| DACH1    | 0.962 | -1.4701 | <0.0001 |
| MT1CP    | 0.97  | -1.4638 | 0.0037  |
| DCN      | 0.871 | -1.4637 | <0.0001 |
| DIRAS3   | 0.877 | -1.4636 | <0.0001 |
| CYP26A1  | 0.897 | -1.4603 | <0.0001 |
| MIR6891  | 0.464 | -1.4569 | <0.0001 |
| IDO2     | 0.864 | -1.4561 | <0.0001 |
| MT1H     | 0.937 | -1.456  | <0.0001 |
| GNA14    | 0.944 | -1.4506 | <0.0001 |
| NGFR     | 0.954 | -1.4414 | <0.0001 |
| FOS      | 0.95  | -1.4412 | <0.0001 |
| LPA      | 0.886 | -1.4396 | <0.0001 |
| SFRP1    | 0.948 | -1.4391 | <0.0001 |
| LRCOL1   | 0.352 | -1.434  | <0.0001 |
| FENDRR   | 0.99  | -1.4323 | 0.0408  |
| KMO      | 0.927 | -1.431  | <0.0001 |

|              |       |         |         |
|--------------|-------|---------|---------|
| BCO2         | 0.949 | -1.4301 | <0.0001 |
| STEAP3       | 0.855 | -1.427  | <0.0001 |
| TUBE1        | 0.879 | -1.4244 | <0.0001 |
| GPR182       | 0.972 | -1.4223 | <0.0001 |
| MT1G         | 0.941 | -1.4216 | <0.0001 |
| KDM8         | 0.881 | -1.4195 | <0.0001 |
| GHR          | 0.867 | -1.4174 | <0.0001 |
| GSTZ1        | 0.937 | -1.4172 | <0.0001 |
| P3H2         | 0.674 | -1.4153 | <0.0001 |
| MRO          | 0.896 | -1.4123 | <0.0001 |
| ITGA9        | 0.94  | -1.4095 | <0.0001 |
| TMEM26       | 0.943 | -1.4077 | <0.0001 |
| C1QTNF1      | 0.869 | -1.4067 | <0.0001 |
| CSRNP1       | 0.923 | -1.406  | <0.0001 |
| CDH19        | 0.936 | -1.4023 | <0.0001 |
| FAM99B       | 0.935 | -1.4014 | <0.0001 |
| ADAMTSL2     | 0.868 | -1.4005 | <0.0001 |
| LOC100509620 | 0.57  | -1.3999 | 0.016   |
| PLSCR4       | 0.891 | -1.394  | <0.0001 |
| ASPG         | 0.943 | -1.3919 | <0.0001 |
| HAO2         | 0.826 | -1.3874 | <0.0001 |
| FREM2        | 0.895 | -1.3872 | <0.0001 |
| ST6GAL2      | 0.928 | -1.3871 | <0.0001 |
| MS4A4E       | 0.799 | -1.387  | <0.0001 |
| CTSLP2       | 0.086 | -1.3858 | <0.0001 |
| MT1X         | 0.943 | -1.3858 | <0.0001 |
| CYP2B6       | 0.907 | -1.3835 | <0.0001 |
| IGFBP3       | 0.923 | -1.377  | <0.0001 |
| UROC1        | 0.876 | -1.3769 | <0.0001 |
| GLS2         | 0.869 | -1.3744 | <0.0001 |
| PDE2A        | 0.942 | -1.3727 | <0.0001 |
| MT1JP        | 0.948 | -1.3713 | <0.0001 |
| HGFAC        | 0.933 | -1.3645 | <0.0001 |

|             |       |         |         |
|-------------|-------|---------|---------|
| CD1D        | 0.931 | -1.3614 | <0.0001 |
| HSD17B13    | 0.82  | -1.3602 | <0.0001 |
| NCBP3       | 0.784 | -1.3583 | 0.0119  |
| ATOH8       | 0.887 | -1.3577 | <0.0001 |
| BMP5        | 0.944 | -1.3554 | <0.0001 |
| OLFML3      | 0.943 | -1.3535 | <0.0001 |
| ETFDH       | 0.927 | -1.3528 | <0.0001 |
| CDC37L1     | 0.93  | -1.3451 | <0.0001 |
| MIR4291     | 0.601 | -1.3415 | 0.0049  |
| IGKV2-30    | 0.419 | -1.3388 | <0.0001 |
| EGR1        | 0.942 | -1.3384 | <0.0001 |
| SFRP5       | 0.899 | -1.3373 | <0.0001 |
| GBA3        | 0.849 | -1.3356 | <0.0001 |
| LHX2        | 0.941 | -1.3285 | <0.0001 |
| PDE7B       | 0.94  | -1.3269 | <0.0001 |
| ID1         | 0.949 | -1.3254 | <0.0001 |
| ACAD11      | 0.962 | -1.3251 | <0.0001 |
| ACSM3       | 0.927 | -1.3246 | <0.0001 |
| PWRN1       | 0.813 | -1.3239 | <0.0001 |
| PLGLA       | 0.945 | -1.3196 | 0.0002  |
| GADD45B     | 0.92  | -1.3184 | <0.0001 |
| SOCS2       | 0.937 | -1.3153 | <0.0001 |
| SNORD115-16 | 0     | -1.3093 | <0.0001 |
| MYOM2       | 0.945 | -1.309  | <0.0001 |
| DNM3OS      | 0.721 | -1.3077 | <0.0001 |
| PVALB       | 0.949 | -1.3068 | <0.0001 |
| KLKB1       | 0.934 | -1.3058 | <0.0001 |
| ALDH8A1     | 0.845 | -1.3051 | <0.0001 |
| IL18R1      | 0.936 | -1.3036 | <0.0001 |
| ANGPTL1     | 0.93  | -1.3035 | <0.0001 |
| KCNK17      | 0.931 | -1.303  | <0.0001 |
| LRRN3       | 0.893 | -1.3021 | <0.0001 |
| HAO2-IT1    | 0.733 | -1.2996 | <0.0001 |



|           |       |         |         |
|-----------|-------|---------|---------|
| ANXA10    | 0.862 | -1.2993 | <0.0001 |
| FAM99A    | 0.938 | -1.2991 | <0.0001 |
| C9        | 0.793 | -1.2981 | <0.0001 |
| IDNK      | 0.868 | -1.2969 | <0.0001 |
| RASGEF1B  | 0.906 | -1.2966 | <0.0001 |
| LY6E      | 0.92  | -1.2956 | <0.0001 |
| BMP10     | 0.97  | -1.2919 | <0.0001 |
| MT1E      | 0.91  | -1.2909 | <0.0001 |
| ZFP36     | 0.936 | -1.288  | <0.0001 |
| GCH1      | 0.942 | -1.288  | <0.0001 |
| GYS2      | 0.902 | -1.2865 | <0.0001 |
| C3P1      | 0.838 | -1.2861 | <0.0001 |
| DCUN1D3   | 0.921 | -1.2831 | <0.0001 |
| HAND2     | 0.953 | -1.2822 | <0.0001 |
| GLYATL1   | 0.936 | -1.2801 | <0.0001 |
| NTN4      | 0.873 | -1.2789 | <0.0001 |
| IGKV2D-29 | 0.904 | -1.2764 | 0.001   |
| C1RL      | 0.869 | -1.276  | <0.0001 |
| ADGRA3    | 0.765 | -1.2735 | 0.0003  |
| HTR2A-AS1 | 0.909 | -1.2714 | 0.0036  |
| ND4L      | 0     | -1.2714 | <0.0001 |
| COLEC11   | 0.927 | -1.2713 | <0.0001 |
| RCL1      | 0.855 | -1.271  | <0.0001 |
| NAAA      | 0.915 | -1.2704 | <0.0001 |
| SLC5A1    | 0.91  | -1.2701 | <0.0001 |
| ACADS     | 0.949 | -1.2684 | <0.0001 |
| CXCL2     | 0.943 | -1.2674 | <0.0001 |
| MT1L      | 0.933 | -1.2656 | <0.0001 |
| FBP1      | 0.916 | -1.2633 | <0.0001 |
| MASP1     | 0.937 | -1.2631 | <0.0001 |
| SLC22A1   | 0.853 | -1.2599 | <0.0001 |
| SYNE1     | 0.943 | -1.2592 | <0.0001 |
| TCF21     | 0.947 | -1.2583 | <0.0001 |

|             |       |         |         |
|-------------|-------|---------|---------|
| IGKV1-12    | 0     | -1.2557 | <0.0001 |
| IGKV2-28    | 0.844 | -1.2551 | 0.0002  |
| EDNRB       | 0.957 | -1.2535 | <0.0001 |
| IGHV3-7     | 0.911 | -1.2516 | <0.0001 |
| RNF165      | 0.91  | -1.2513 | <0.0001 |
| MT2A        | 0.95  | -1.2484 | <0.0001 |
| RBMS3       | 0.942 | -1.2481 | <0.0001 |
| FOSB        | 0.937 | -1.247  | <0.0001 |
| PBLD        | 0.778 | -1.2467 | <0.0001 |
| N4BP2L1     | 0.871 | -1.2461 | <0.0001 |
| GRAMD1C     | 0.869 | -1.2458 | <0.0001 |
| KRT18P4     | 0.464 | -1.2426 | <0.0001 |
| ATP8        | 0     | -1.2421 | <0.0001 |
| AZGP1P1     | 0.937 | -1.2396 | <0.0001 |
| JCHAIN      | 0.803 | -1.2395 | 0.0019  |
| CYP4A22     | 0.862 | -1.2394 | <0.0001 |
| SHBG        | 0.945 | -1.2377 | <0.0001 |
| COL6A6      | 0.896 | -1.2372 | <0.0001 |
| PLGLB1      | 0.901 | -1.2362 | <0.0001 |
| PDGFRA      | 0.89  | -1.2358 | <0.0001 |
| RDH16       | 0.812 | -1.235  | <0.0001 |
| LINC01620   | 0.872 | -1.2343 | 0.0406  |
| IGHV2-5     | 0.701 | -1.233  | <0.0001 |
| RPL5P30     | 0.739 | -1.2319 | 0.0011  |
| CLRN3       | 0.821 | -1.2289 | <0.0001 |
| SLCO1B3     | 0.866 | -1.2277 | <0.0001 |
| PROZ        | 0.882 | -1.2268 | <0.0001 |
| IGHV3-49    | 0.926 | -1.2255 | 0.0027  |
| TMEM82      | 0.829 | -1.2255 | <0.0001 |
| SLITRK6     | 0.935 | -1.2252 | <0.0001 |
| SRD5A2      | 0.942 | -1.222  | <0.0001 |
| TEK         | 0.961 | -1.2218 | <0.0001 |
| SNORD115-10 | 0     | -1.2215 | <0.0001 |

|              |       |         |         |
|--------------|-------|---------|---------|
| MPC1         | 0.756 | -1.2212 | <0.0001 |
| ZG16         | 0.899 | -1.2205 | <0.0001 |
| STARD5       | 0.879 | -1.2184 | <0.0001 |
| CIDEB        | 0.845 | -1.218  | <0.0001 |
| CYP4F35P     | 0.143 | -1.2171 | <0.0001 |
| GNAO1        | 0.951 | -1.2143 | <0.0001 |
| LOC100130899 | 0.671 | -1.2135 | 0.0011  |
| KLRF1        | 0.754 | -1.2111 | <0.0001 |
| SKAP1        | 0.93  | -1.2095 | <0.0001 |
| GCDH         | 0.946 | -1.2082 | <0.0001 |
| LPAL2        | 0.923 | -1.208  | <0.0001 |
| GLYAT        | 0.83  | -1.2063 | <0.0001 |
| CD4          | 0.924 | -1.2055 | <0.0001 |
| GABARAPL1    | 0.872 | -1.2052 | <0.0001 |
| IL1RAP       | 0.913 | -1.2051 | <0.0001 |
| NDRG2        | 0.935 | -1.2046 | <0.0001 |
| IGLV1-51     | 0.871 | -1.2042 | 0.0096  |
| MOGAT2       | 0.914 | -1.2035 | <0.0001 |
| TDRD15       | 0.84  | -1.2029 | <0.0001 |
| RN7SKP296    | 0.807 | -1.2015 | <0.0001 |
| IGF1         | 0.921 | -1.1981 | <0.0001 |
| ECRG4        | 0.506 | -1.1953 | 0.0008  |
| RANBP3L      | 0.897 | -1.1953 | <0.0001 |
| MS4A6A       | 0.939 | -1.1948 | <0.0001 |
| C14orf180    | 0.94  | -1.1941 | <0.0001 |
| BDH2         | 0.926 | -1.194  | <0.0001 |
| MFAP4        | 0.896 | -1.192  | <0.0001 |
| CCDC3        | 0.884 | -1.1909 | <0.0001 |
| GCGR         | 0.927 | -1.1899 | <0.0001 |
| GCKR         | 0.92  | -1.1895 | <0.0001 |
| INS-IGF2     | 0.956 | -1.1892 | <0.0001 |
| SERPINA11    | 0.769 | -1.1878 | <0.0001 |
| CYP2C8       | 0.75  | -1.1872 | <0.0001 |

|           |       |         |         |
|-----------|-------|---------|---------|
| FAM83F    | 0.916 | -1.1863 | <0.0001 |
| DEPDC7    | 0.821 | -1.1862 | <0.0001 |
| HBA2      | 0.882 | -1.1861 | <0.0001 |
| RDH5      | 0.95  | -1.1858 | <0.0001 |
| ALLC      | 0.902 | -1.1842 | <0.0001 |
| C1orf162  | 0.828 | -1.1831 | <0.0001 |
| HGF       | 0.954 | -1.1828 | <0.0001 |
| TENM1     | 0.902 | -1.1824 | <0.0001 |
| SLC22A10  | 0.757 | -1.1819 | <0.0001 |
| CLDN10    | 0.931 | -1.1819 | <0.0001 |
| SPATA18   | 0.896 | -1.1807 | <0.0001 |
| PHACTR3   | 0.915 | -1.1783 | <0.0001 |
| P2RY13    | 0.893 | -1.176  | <0.0001 |
| RD3L      | 0.652 | -1.1733 | <0.0001 |
| ADH4      | 0.789 | -1.173  | <0.0001 |
| PLCXD3    | 0.841 | -1.1713 | <0.0001 |
| SPATA6L   | 0.863 | -1.171  | <0.0001 |
| SOCS2-AS1 | 0.903 | -1.1706 | <0.0001 |
| CYP2C9    | 0.814 | -1.1702 | <0.0001 |
| C8A       | 0.949 | -1.1682 | <0.0001 |
| SLC19A3   | 0.811 | -1.1675 | <0.0001 |
| PTPRB     | 0.935 | -1.1669 | <0.0001 |
| ADRA1B    | 0.929 | -1.1664 | <0.0001 |
| ADGRG7    | 0.847 | -1.1651 | 0.0025  |
| VMO1      | 0.872 | -1.1648 | <0.0001 |
| THRSP     | 0.707 | -1.1646 | <0.0001 |
| PRKAR2B   | 0.941 | -1.1646 | <0.0001 |
| DBH-AS1   | 0.906 | -1.1645 | <0.0001 |
| FCGR2B    | 0.894 | -1.1643 | <0.0001 |
| FAHD2A    | 0.886 | -1.163  | <0.0001 |
| MBL1P     | 0.929 | -1.1627 | <0.0001 |
| ACAA1     | 0.95  | -1.1623 | <0.0001 |
| RNF125    | 0.879 | -1.1615 | <0.0001 |

|            |       |         |         |
|------------|-------|---------|---------|
| MST1P2     | 0.911 | -1.1603 | 0.0003  |
| FYN        | 0.946 | -1.16   | <0.0001 |
| HOGA1      | 0.745 | -1.1597 | <0.0001 |
| BCKDHB     | 0.83  | -1.1595 | <0.0001 |
| SIGLEC1    | 0.869 | -1.1577 | <0.0001 |
| PCK1       | 0.822 | -1.1569 | <0.0001 |
| CPED1      | 0.854 | -1.156  | <0.0001 |
| CNTN3      | 0.912 | -1.1545 | <0.0001 |
| LARP1B     | 0.877 | -1.1543 | <0.0001 |
| F11        | 0.905 | -1.1527 | <0.0001 |
| CBR4       | 0.888 | -1.1507 | <0.0001 |
| MIR503HG   | 0.842 | -1.1492 | 0.0002  |
| TPPP2      | 0.85  | -1.1488 | <0.0001 |
| ANTXR2     | 0.855 | -1.1488 | <0.0001 |
| SIGLEC7    | 0.861 | -1.1485 | <0.0001 |
| AFM        | 0.921 | -1.1484 | <0.0001 |
| FAM13A     | 0.898 | -1.1483 | <0.0001 |
| SORL1      | 0.926 | -1.1483 | <0.0001 |
| CAMK2B     | 0.907 | -1.1475 | <0.0001 |
| IL33       | 0.892 | -1.1458 | <0.0001 |
| ETS2       | 0.932 | -1.1435 | <0.0001 |
| KCND3      | 0.903 | -1.1431 | <0.0001 |
| HMGCLL1    | 0.898 | -1.1417 | <0.0001 |
| NMRK1      | 0.851 | -1.1414 | <0.0001 |
| MYO10      | 0.929 | -1.1394 | <0.0001 |
| SPRY2      | 0.948 | -1.1393 | <0.0001 |
| IGKV3-15   | 0.822 | -1.1391 | 0.0071  |
| PDZRN4     | 0.885 | -1.1382 | <0.0001 |
| IGKV1-16   | 0.877 | -1.1381 | 0.0267  |
| ZGPAT      | 0.948 | -1.138  | <0.0001 |
| C6         | 0.884 | -1.1372 | <0.0001 |
| LINC02153  | 0.89  | -1.1362 | 0.0137  |
| NUTM2B-AS1 | 0.334 | -1.1359 | <0.0001 |

|             |       |         |         |
|-------------|-------|---------|---------|
| NNMT        | 0.921 | -1.1358 | <0.0001 |
| MSRA        | 0.868 | -1.1354 | <0.0001 |
| DHODH       | 0.911 | -1.1347 | <0.0001 |
| MRPS36P4    | 0.749 | -1.1334 | 0.0039  |
| CYP2C19     | 0.945 | -1.1326 | <0.0001 |
| ID2         | 0.933 | -1.1311 | <0.0001 |
| IGLV1-36    | 0.814 | -1.131  | 0.0064  |
| ZFP1        | 0.841 | -1.1298 | <0.0001 |
| FEZ1        | 0.941 | -1.1291 | <0.0001 |
| ENO3        | 0.884 | -1.129  | <0.0001 |
| LOC200772   | 0.548 | -1.127  | <0.0001 |
| NUDT10      | 0.95  | -1.127  | <0.0001 |
| WDR66       | 0.917 | -1.1268 | <0.0001 |
| ALPL        | 0.902 | -1.1258 | <0.0001 |
| CYP3A4      | 0.932 | -1.1254 | <0.0001 |
| NAPSB       | 0.963 | -1.1233 | <0.0001 |
| AZGP1P2     | 0     | -1.1219 | <0.0001 |
| IGLV3-1     | 0.779 | -1.1218 | <0.0001 |
| ZNF330      | 0.884 | -1.1214 | <0.0001 |
| PACERR      | 0.446 | -1.1205 | <0.0001 |
| SYTL5       | 0.93  | -1.1204 | <0.0001 |
| PCDH9-AS2   | 0.245 | -1.1192 | <0.0001 |
| C1R         | 0.928 | -1.119  | <0.0001 |
| CD244       | 0.933 | -1.1188 | <0.0001 |
| MTND4P20    | 0.756 | -1.1166 | 0.0043  |
| SPRYD4      | 0.865 | -1.1165 | <0.0001 |
| IVD         | 0.928 | -1.1163 | <0.0001 |
| ACSL1       | 0.903 | -1.115  | <0.0001 |
| ASS1        | 0.955 | -1.1145 | <0.0001 |
| AKR7A3      | 0.807 | -1.1132 | <0.0001 |
| B4GALT1-AS1 | 0.616 | -1.1128 | 0.0213  |
| MT1A        | 0.931 | -1.1111 | <0.0001 |
| AGXT2       | 0.827 | -1.111  | <0.0001 |

|             |       |         |         |
|-------------|-------|---------|---------|
| ABCA8       | 0.899 | -1.1108 | <0.0001 |
| SIGLEC11    | 0.881 | -1.1106 | <0.0001 |
| GGT5        | 0.82  | -1.1099 | <0.0001 |
| CLEC3B      | 0.958 | -1.1084 | <0.0001 |
| AKR1D1      | 0.905 | -1.1072 | <0.0001 |
| EPHA2       | 0.939 | -1.1072 | <0.0001 |
| GPD1        | 0.917 | -1.1063 | <0.0001 |
| MIR3918     | 0.07  | -1.1054 | <0.0001 |
| TFPI2       | 0.924 | -1.1042 | <0.0001 |
| RBMXP2      | 0.418 | -1.1041 | <0.0001 |
| EPHX2       | 0.927 | -1.1036 | <0.0001 |
| TSLP        | 0.893 | -1.1033 | <0.0001 |
| ACADL       | 0.915 | -1.1029 | <0.0001 |
| IGHV3-15    | 0.869 | -1.0991 | 0.0003  |
| ANK3        | 0.906 | -1.0943 | <0.0001 |
| CROCCP2     | 0.921 | -1.093  | <0.0001 |
| F9          | 0.875 | -1.0927 | <0.0001 |
| FOLH1B      | 0.841 | -1.0924 | <0.0001 |
| IGKV2D-30   | 0.925 | -1.0923 | 0.0216  |
| SLC9B2      | 0.821 | -1.0923 | <0.0001 |
| ST3GAL6     | 0.914 | -1.0915 | <0.0001 |
| HBB         | 0.93  | -1.091  | <0.0001 |
| IRF8        | 0.942 | -1.0899 | <0.0001 |
| ALDH2       | 0.942 | -1.0896 | <0.0001 |
| CD14        | 0.94  | -1.0889 | <0.0001 |
| MIR22HG     | 0.832 | -1.0888 | <0.0001 |
| MLYCD       | 0.873 | -1.0888 | <0.0001 |
| MCC         | 0.956 | -1.0867 | <0.0001 |
| SNORD115-40 | 0.702 | -1.084  | <0.0001 |
| EFNB3       | 0.936 | -1.0833 | <0.0001 |
| ADGRB3      | 0.876 | -1.0824 | 0.0121  |
| SMAD6       | 0.937 | -1.0824 | <0.0001 |
| ADAMTS9-AS2 | 0.632 | -1.0807 | <0.0001 |

|             |       |         |         |
|-------------|-------|---------|---------|
| CSAD        | 0.895 | -1.0804 | <0.0001 |
| CYP4V2      | 0.777 | -1.0787 | <0.0001 |
| SNORD115-33 | 0.775 | -1.0782 | 0.0005  |
| AKR1C8P     | 0.784 | -1.0782 | 0.0064  |
| TDO2        | 0.744 | -1.0772 | <0.0001 |
| PKHD1       | 0.829 | -1.0772 | <0.0001 |
| RNF152      | 0.913 | -1.0763 | <0.0001 |
| SVEP1       | 0.852 | -1.076  | <0.0001 |
| CYP4A11     | 0.897 | -1.075  | <0.0001 |
| ACADVL      | 0.945 | -1.0731 | <0.0001 |
| FAM149A     | 0.849 | -1.0717 | <0.0001 |
| IGLV7-43    | 0.896 | -1.0716 | 0.0016  |
| PXDC1       | 0.856 | -1.0703 | <0.0001 |
| PHYHD1      | 0.835 | -1.0689 | <0.0001 |
| HMGCL       | 0.909 | -1.0687 | <0.0001 |
| CTH         | 0.914 | -1.0687 | <0.0001 |
| GNE         | 0.931 | -1.0674 | <0.0001 |
| PDLIM5      | 0.946 | -1.0668 | <0.0001 |
| CYP3A43     | 0.877 | -1.0667 | <0.0001 |
| TTC41P      | 0.468 | -1.0652 | <0.0001 |
| ALDH6A1     | 0.921 | -1.0652 | <0.0001 |
| CYP4F29P    | 0.819 | -1.0637 | 0.0018  |
| INTS10      | 0.904 | -1.0636 | <0.0001 |
| CPT2        | 0.9   | -1.0632 | <0.0001 |
| TCTEX1D1    | 0.844 | -1.063  | <0.0001 |
| MT1HL1      | 0.789 | -1.0616 | <0.0001 |
| SPP2        | 0.915 | -1.0612 | <0.0001 |
| MT1IP       | 0.862 | -1.0602 | <0.0001 |
| AXL         | 0.93  | -1.0592 | <0.0001 |
| LDHD        | 0.836 | -1.0583 | <0.0001 |
| COL25A1     | 0.946 | -1.0575 | <0.0001 |
| ABCA9       | 0.856 | -1.0573 | <0.0001 |
| FXN         | 0.938 | -1.0571 | <0.0001 |



|              |       |         |         |
|--------------|-------|---------|---------|
| SMPD3        | 0.924 | -1.057  | <0.0001 |
| IL18RAP      | 0.853 | -1.0569 | <0.0001 |
| MIR3185      | 0.267 | -1.0566 | <0.0001 |
| IGLC6        | 0.491 | -1.0563 | <0.0001 |
| SHPK         | 0.946 | -1.0563 | <0.0001 |
| PNPLA7       | 0.906 | -1.056  | <0.0001 |
| SNORD115-34  | 0.861 | -1.0548 | 0.0073  |
| FTCD         | 0.805 | -1.0543 | <0.0001 |
| OR10J6P      | 0.949 | -1.0541 | 0.0335  |
| GNMT         | 0.85  | -1.0532 | <0.0001 |
| SNORD115-31  | 0.814 | -1.0518 | 0.002   |
| NPHP3-ACAD11 | 0     | -1.0517 | <0.0001 |
| CCL14        | 0.951 | -1.0515 | <0.0001 |
| APOA5        | 0.806 | -1.0512 | <0.0001 |
| HBA1         | 0.938 | -1.051  | <0.0001 |
| GNG12-AS1    | 0.8   | -1.0501 | 0.0001  |
| PALM2        | 0.836 | -1.05   | <0.0001 |
| PEMT         | 0.918 | -1.0487 | <0.0001 |
| CCL23        | 0.949 | -1.0462 | <0.0001 |
| IGKV1-27     | 0.813 | -1.0452 | 0.0001  |
| OGDHL        | 0.9   | -1.044  | <0.0001 |
| SLC39A5      | 0.715 | -1.0426 | <0.0001 |
| TSPAN9-IT1   | 0.908 | -1.0421 | 0.0408  |
| ACAA2        | 0.925 | -1.0419 | <0.0001 |
| IGLV1-47     | 0.882 | -1.0413 | 0.0423  |
| FBXW11P1     | 0.821 | -1.041  | 0.023   |
| DSE          | 0.92  | -1.0409 | <0.0001 |
| MAGI2-AS3    | 0.863 | -1.0384 | <0.0001 |
| IGLV3-10     | 0.835 | -1.038  | 0.0161  |
| SNORD115-5   | 0     | -1.0373 | <0.0001 |
| CYP2A7       | 0.865 | -1.0364 | <0.0001 |
| FXVD1        | 0.942 | -1.0362 | <0.0001 |
| IGHM         | 0.833 | -1.035  | <0.0001 |

|             |       |         |         |
|-------------|-------|---------|---------|
| GCNT1P3     | 0.844 | -1.0343 | 0.0438  |
| MT1DP       | 0.884 | -1.034  | <0.0001 |
| GREM2       | 0.849 | -1.0334 | <0.0001 |
| IGKV4-1     | 0.866 | -1.0333 | 0.0013  |
| COX10-AS1   | 0.979 | -1.0323 | 0.0275  |
| SNORD115-6  | 0     | -1.0318 | <0.0001 |
| VSIG4       | 0.911 | -1.0294 | <0.0001 |
| SNORD115-41 | 0.701 | -1.0283 | 0.0001  |
| SCARA5      | 0.882 | -1.0282 | <0.0001 |
| PZP         | 0.918 | -1.028  | <0.0001 |
| LINC00844   | 0.235 | -1.0278 | <0.0001 |
| NDEL1       | 0.948 | -1.0271 | <0.0001 |
| DMGDH       | 0.716 | -1.0261 | <0.0001 |
| NAT1        | 0.897 | -1.0258 | <0.0001 |
| SLC27A5     | 0.804 | -1.0247 | <0.0001 |
| B3GAT1      | 0.853 | -1.0246 | <0.0001 |
| ZFPM2       | 0.878 | -1.0235 | <0.0001 |
| DUSP1       | 0.911 | -1.0233 | <0.0001 |
| SLC38A2     | 0.903 | -1.0224 | <0.0001 |
| F8          | 0.935 | -1.0223 | <0.0001 |
| PANK1       | 0.8   | -1.0213 | <0.0001 |
| XDH         | 0.901 | -1.0211 | <0.0001 |
| KCNJ16      | 0.867 | -1.021  | <0.0001 |
| P2RY12      | 0.906 | -1.0209 | <0.0001 |
| FOXO1       | 0.938 | -1.0188 | <0.0001 |
| DHRS1       | 0.851 | -1.0177 | <0.0001 |
| IGHV1-3     | 0     | -1.0174 | <0.0001 |
| MUC6        | 0.859 | -1.0171 | <0.0001 |
| C8B         | 0.851 | -1.0169 | <0.0001 |
| PITPNM3     | 0.945 | -1.0159 | <0.0001 |
| C11orf96    | 0.811 | -1.0156 | <0.0001 |
| ACACB       | 0.889 | -1.0154 | <0.0001 |
| MT1P3       | 0.979 | -1.0151 | 0.025   |

|               |       |         |         |
|---------------|-------|---------|---------|
| CYP8B1        | 0.618 | -1.0151 | <0.0001 |
| RIDA          | 0     | -1.0147 | <0.0001 |
| SLC16A4       | 0.885 | -1.0147 | <0.0001 |
| GIMAP1-GIMAP5 | 0.44  | -1.0129 | <0.0001 |
| MINDY3        | 0.828 | -1.012  | 0.0059  |
| KLHL2         | 0.882 | -1.012  | <0.0001 |
| RAMP3         | 0.947 | -1.0116 | <0.0001 |
| A2M-AS1       | 0.768 | -1.0109 | <0.0001 |
| FERMT2        | 0.838 | -1.0107 | <0.0001 |
| RIC3          | 0.928 | -1.0095 | <0.0001 |
| MYCT1         | 0.921 | -1.0093 | <0.0001 |
| MIR6892       | 0.447 | -1.009  | <0.0001 |
| MFAP3L        | 0.901 | -1.009  | <0.0001 |
| LINC00987     | 0.59  | -1.0084 | 0.0162  |
| ANKS1A        | 0.874 | -1.0084 | <0.0001 |
| STAB1         | 0.925 | -1.0062 | <0.0001 |
| ASPDH         | 0.827 | -1.0061 | <0.0001 |
| PCDH9         | 0.92  | -1.006  | <0.0001 |
| SULT1A2       | 0.817 | -1.0056 | <0.0001 |
| IGHV3-33      | 0.798 | -1.0045 | 0.0001  |
| MBL2          | 0.893 | -1.0036 | <0.0001 |
| SLC9A9        | 0.915 | -1.0034 | <0.0001 |
| CYB5D2        | 0.869 | -1.0027 | <0.0001 |
| AGTR1         | 0.877 | -1.0026 | <0.0001 |
| CXCR2P1       | 0.573 | -1.0025 | <0.0001 |
| RN7SL130P     | 0.92  | -1.0022 | 0.0193  |
| CD163         | 0.917 | -1.0021 | <0.0001 |
| CFTR          | 0.898 | -1.0015 | <0.0001 |
| IGHV4-59      | 0.903 | -1.0004 | 0.0008  |
| WDR72         | 0.832 | -1.0004 | <0.0001 |
| LONP2         | 0.817 | -1      | <0.0001 |
| DNAJC12       | 0.822 | -0.9972 | <0.0001 |
| FAM163B       | 0.953 | -0.9963 | <0.0001 |

|             |       |         |         |
|-------------|-------|---------|---------|
| IGLV3-9     | 0.891 | -0.9958 | 0.0026  |
| SNX29P2     | 0.968 | -0.9952 | 0.0014  |
| CLEC12A     | 0.782 | -0.9949 | <0.0001 |
| TAT         | 0.859 | -0.9946 | <0.0001 |
| CYP2A6      | 0.907 | -0.9945 | <0.0001 |
| CCL19       | 0.917 | -0.9933 | <0.0001 |
| SARDH       | 0.847 | -0.9932 | <0.0001 |
| BBOX1       | 0.868 | -0.993  | <0.0001 |
| ECHS1       | 0.936 | -0.9922 | <0.0001 |
| AOAH-IT1    | 0.753 | -0.9918 | 0.0002  |
| MMAA        | 0.759 | -0.9911 | <0.0001 |
| MYD88       | 0.885 | -0.9905 | <0.0001 |
| ECHDC2      | 0.912 | -0.9905 | <0.0001 |
| MPPED1      | 0.88  | -0.9904 | <0.0001 |
| WBP1L       | 0.828 | -0.9896 | <0.0001 |
| CA2         | 0.923 | -0.9894 | <0.0001 |
| SLC4A4      | 0.905 | -0.989  | <0.0001 |
| PGA3        | 0.876 | -0.9882 | <0.0001 |
| TAT-AS1     | 0.279 | -0.9873 | <0.0001 |
| ERLIN1      | 0.931 | -0.9872 | <0.0001 |
| RAB11FIP1P1 | 0.819 | -0.987  | 0.0317  |
| ADH1B       | 0.911 | -0.9865 | <0.0001 |
| CNTN4       | 0.94  | -0.9861 | <0.0001 |
| SLC41A2     | 0.812 | -0.9848 | <0.0001 |
| MIR3180-5   | 0     | -0.9836 | <0.0001 |
| IGKV3-20    | 0.857 | -0.9828 | <0.0001 |
| ALDH1L1-AS1 | 0.326 | -0.9811 | <0.0001 |
| IGHV3-72    | 0.728 | -0.9809 | <0.0001 |
| PELI2       | 0.89  | -0.9808 | <0.0001 |
| SDS         | 0.821 | -0.9799 | <0.0001 |
| ARSD-AS1    | 0.647 | -0.9798 | 0.0048  |
| SLC7A2      | 0.935 | -0.9796 | <0.0001 |
| FITM1       | 0.92  | -0.9779 | <0.0001 |

|             |       |         |         |
|-------------|-------|---------|---------|
| SNORD115-38 | 0.65  | -0.9768 | 0.0003  |
| CYP4F2      | 0.8   | -0.9768 | <0.0001 |
| DPF3        | 0.934 | -0.9766 | <0.0001 |
| SAA4        | 0.939 | -0.9766 | <0.0001 |
| CD302       | 0.938 | -0.976  | <0.0001 |
| IGHG4       | 0.828 | -0.9758 | <0.0001 |
| ADK         | 0.915 | -0.9757 | <0.0001 |
| TRPV4       | 0.868 | -0.9755 | <0.0001 |
| ATP6        | 0.904 | -0.9754 | 0.0043  |
| MRC1        | 0.911 | -0.9754 | <0.0001 |
| RNF150      | 0.788 | -0.9753 | <0.0001 |
| SEC24B      | 0.92  | -0.9753 | <0.0001 |
| ZCCHC24     | 0.867 | -0.9751 | <0.0001 |
| UGT2B10     | 0.799 | -0.9747 | <0.0001 |
| SUCLG2      | 0.797 | -0.9744 | <0.0001 |
| CEP164P1    | 0.926 | -0.9742 | 0.0391  |
| GK-AS1      | 0.779 | -0.9731 | 0.0001  |
| VIPR1-AS1   | 0.93  | -0.9722 | 0.0234  |
| NR1I2       | 0.844 | -0.9718 | <0.0001 |
| DTX1        | 0.826 | -0.9712 | <0.0001 |
| ACSM5       | 0.822 | -0.9701 | <0.0001 |
| NSUN6       | 0.858 | -0.9698 | <0.0001 |
| ZSWIM6      | 0.84  | -0.9693 | <0.0001 |
| SEMA6D      | 0.877 | -0.9687 | <0.0001 |
| INPP5B      | 0.952 | -0.9687 | <0.0001 |
| TMEM220     | 0.793 | -0.9686 | <0.0001 |
| CDA         | 0.9   | -0.968  | <0.0001 |
| CAT         | 0.927 | -0.968  | <0.0001 |
| AGL         | 0.869 | -0.9679 | <0.0001 |
| FNDC4       | 0.843 | -0.9675 | <0.0001 |
| RPL23P2     | 0.651 | -0.9665 | 0.0021  |
| LOC400553   | 0.731 | -0.9662 | 0.0016  |
| HK3         | 0.913 | -0.966  | <0.0001 |

|             |       |         |         |
|-------------|-------|---------|---------|
| SULF2       | 0.845 | -0.9658 | <0.0001 |
| MAT1A       | 0.934 | -0.9648 | <0.0001 |
| IGKV2D-28   | 0.811 | -0.9647 | <0.0001 |
| TLR4        | 0.905 | -0.9647 | <0.0001 |
| BCHE        | 0.881 | -0.9645 | <0.0001 |
| SRD5A1      | 0.907 | -0.9643 | <0.0001 |
| IGHG2       | 0.917 | -0.9641 | 0.0033  |
| OGFR-AS1    | 0     | -0.9623 | <0.0001 |
| SRSF8       | 0.771 | -0.9622 | <0.0001 |
| CYP2J2      | 0.9   | -0.9615 | <0.0001 |
| SNORD115-25 | 0.312 | -0.9598 | <0.0001 |
| RBMS3-AS3   | 0.926 | -0.9574 | 0.0003  |
| SMIM24      | 0.917 | -0.957  | <0.0001 |
| IGLC1       | 0.856 | -0.9567 | <0.0001 |
| MICU3       | 0.934 | -0.9564 | <0.0001 |
| MIR1233-1   | 0.113 | -0.9561 | <0.0001 |
| PTGIS       | 0.928 | -0.9561 | <0.0001 |
| MIR1538     | 0     | -0.9546 | <0.0001 |
| AMDHD1      | 0.788 | -0.954  | <0.0001 |
| PRAM1       | 0.913 | -0.9535 | <0.0001 |
| SLC25A20    | 0.724 | -0.953  | <0.0001 |
| FBLN5       | 0.906 | -0.9529 | <0.0001 |
| IGHV5-51    | 0.802 | -0.9528 | 0.0003  |
| EPB41L4B    | 0.915 | -0.9516 | <0.0001 |
| DDX19B      | 0.888 | -0.9514 | <0.0001 |
| PTGS2       | 0.891 | -0.9514 | <0.0001 |
| GOT2        | 0.894 | -0.9512 | <0.0001 |
| PALM3       | 0.839 | -0.9509 | <0.0001 |
| CRPP1       | 0.676 | -0.95   | 0.0101  |
| LINC00571   | 0.793 | -0.9494 | 0.0003  |
| FMO2        | 0.866 | -0.9493 | <0.0001 |
| LINC01146   | 0.558 | -0.9486 | <0.0001 |
| NR3C2       | 0.912 | -0.948  | <0.0001 |

|              |       |         |         |
|--------------|-------|---------|---------|
| LINC01507    | 0.74  | -0.9479 | 0.0174  |
| CFI          | 0.867 | -0.9477 | <0.0001 |
| ABAT         | 0.897 | -0.9472 | <0.0001 |
| SLC7A8       | 0.938 | -0.9469 | <0.0001 |
| TMEM45A      | 0.792 | -0.9468 | <0.0001 |
| RCBTB2       | 0.922 | -0.946  | <0.0001 |
| FAT4         | 0.819 | -0.9458 | <0.0001 |
| TMPRSS2      | 0.861 | -0.9457 | <0.0001 |
| SNORD115-32  | 0.898 | -0.9455 | 0.0016  |
| ARHGAP10     | 0.902 | -0.9452 | <0.0001 |
| SIGIRR       | 0.884 | -0.9451 | <0.0001 |
| ADH1C        | 0.77  | -0.9447 | <0.0001 |
| ETNPPL       | 0.764 | -0.9441 | <0.0001 |
| LONRF1       | 0.907 | -0.9441 | <0.0001 |
| BGN          | 0.924 | -0.944  | <0.0001 |
| LOC101928505 | 0     | -0.9437 | <0.0001 |
| IGHA2        | 0.18  | -0.9432 | <0.0001 |
| SPRY4-IT1    | 0     | -0.9424 | <0.0001 |
| TMEM71       | 0.848 | -0.9423 | <0.0001 |
| ADH6         | 0.906 | -0.9419 | <0.0001 |
| ADAMTS2      | 0.922 | -0.9414 | <0.0001 |
| NIPAL1       | 0.668 | -0.9409 | <0.0001 |
| CBFA2T3      | 0.952 | -0.9403 | <0.0001 |
| PGLYRP2      | 0.898 | -0.9386 | <0.0001 |
| DLC1         | 0.891 | -0.9381 | <0.0001 |
| ADGRA1-AS1   | 0.215 | -0.9379 | <0.0001 |
| MTHFD1       | 0.934 | -0.9378 | <0.0001 |
| ADRA2B       | 0.966 | -0.9377 | <0.0001 |
| IGLV3-27     | 0.864 | -0.9374 | 0.0029  |
| IL13RA2      | 0.922 | -0.9374 | <0.0001 |
| TTC39B       | 0.796 | -0.937  | <0.0001 |
| PLA2G5       | 0.904 | -0.937  | <0.0001 |
| SH3BP5-AS1   | 0.938 | -0.9365 | 0.0017  |

|             |       |         |         |
|-------------|-------|---------|---------|
| FLNB-AS1    | 0.85  | -0.9364 | 0.0007  |
| ARHGEF26    | 0.809 | -0.9363 | <0.0001 |
| ITIH4       | 0.962 | -0.9363 | <0.0001 |
| IGHV6-1     | 0.228 | -0.9357 | <0.0001 |
| FXVD6       | 0.919 | -0.9344 | <0.0001 |
| GPHN        | 0.778 | -0.9342 | <0.0001 |
| ACADSB      | 0.86  | -0.9338 | <0.0001 |
| BHMT        | 0.801 | -0.9336 | <0.0001 |
| TMEM56      | 0.823 | -0.9336 | <0.0001 |
| ACOT12      | 0.741 | -0.9318 | <0.0001 |
| IGHV3-74    | 0.856 | -0.9315 | 0.0002  |
| LINC00261   | 0.734 | -0.9314 | <0.0001 |
| PPP1R3B     | 0.806 | -0.9313 | <0.0001 |
| CD300A      | 0.855 | -0.9311 | <0.0001 |
| NFKBIZ      | 0.905 | -0.9303 | <0.0001 |
| IL1RL1      | 0.919 | -0.9303 | <0.0001 |
| SELP        | 0.945 | -0.9301 | <0.0001 |
| AMHR2       | 0.942 | -0.9297 | <0.0001 |
| LINC01128   | 0.966 | -0.9295 | 0.0148  |
| SULT1A1     | 0.901 | -0.9293 | <0.0001 |
| SAMD11      | 0.882 | -0.9281 | <0.0001 |
| JUNB        | 0.929 | -0.9275 | <0.0001 |
| PRKAG2      | 0.84  | -0.9273 | <0.0001 |
| GPR65       | 0.869 | -0.9272 | <0.0001 |
| DCAF11      | 0.783 | -0.927  | <0.0001 |
| HSD17B2     | 0.919 | -0.927  | <0.0001 |
| ADAMTS9-AS1 | 0.172 | -0.9266 | <0.0001 |
| SERPINA4    | 0.809 | -0.9258 | <0.0001 |
| FANCC       | 0.941 | -0.9255 | <0.0001 |
| KIF19       | 0.942 | -0.9251 | <0.0001 |
| SLC46A3     | 0.781 | -0.9249 | <0.0001 |
| PAIP2B      | 0.89  | -0.9242 | <0.0001 |
| SLC25A37    | 0.934 | -0.9239 | <0.0001 |



|             |       |         |         |
|-------------|-------|---------|---------|
| SLC39A14    | 0.946 | -0.9238 | <0.0001 |
| PER1        | 0.918 | -0.9233 | <0.0001 |
| UGP2        | 0.864 | -0.9231 | <0.0001 |
| CYP2E1      | 0.887 | -0.9221 | <0.0001 |
| RN7SL12P    | 0.786 | -0.9214 | 0.0008  |
| CCL21       | 0.884 | -0.9214 | <0.0001 |
| ARHGAP15    | 0.876 | -0.9204 | <0.0001 |
| IGLV2-14    | 0.66  | -0.9185 | <0.0001 |
| MST1        | 0.858 | -0.9182 | <0.0001 |
| POLR1E      | 0.851 | -0.9167 | <0.0001 |
| CHST7       | 0.825 | -0.9161 | <0.0001 |
| PROM1       | 0.871 | -0.9152 | <0.0001 |
| TNS2        | 0.911 | -0.9148 | 0.0205  |
| IGKV1D-33   | 0.843 | -0.9145 | 0.0003  |
| PLIN1       | 0.837 | -0.9145 | <0.0001 |
| IGKV2D-24   | 0.887 | -0.9141 | 0.001   |
| LINC00598   | 0.952 | -0.9128 | 0.0009  |
| LRRC4C      | 0.851 | -0.9126 | <0.0001 |
| DNAJC25     | 0.875 | -0.9121 | <0.0001 |
| AQP3        | 0.928 | -0.912  | <0.0001 |
| GIMAP8      | 0.909 | -0.9111 | <0.0001 |
| ENG         | 0.928 | -0.911  | <0.0001 |
| ZC2HC1C     | 0.755 | -0.9102 | <0.0001 |
| AQP7        | 0.949 | -0.9101 | <0.0001 |
| IGHV3-66    | 0.917 | -0.9097 | 0.0215  |
| MAP2K1      | 0.942 | -0.909  | <0.0001 |
| SNORD115-24 | 0.796 | -0.9084 | 0.0093  |
| EXPH5       | 0.901 | -0.9079 | <0.0001 |
| GPT2        | 0.837 | -0.9078 | <0.0001 |
| SEN3-EIF4A1 | 0     | -0.9073 | 0.0014  |
| IGHV3-20    | 0.643 | -0.9068 | <0.0001 |
| FRMD4B      | 0.918 | -0.9068 | <0.0001 |
| CCDC25      | 0.808 | -0.9065 | <0.0001 |

|             |       |         |         |
|-------------|-------|---------|---------|
| DIO3OS      | 0.905 | -0.9063 | <0.0001 |
| ZEB2        | 0.851 | -0.9059 | <0.0001 |
| GOLGA8R     | 0.86  | -0.9058 | 0.0024  |
| SLC10A1     | 0.876 | -0.9057 | <0.0001 |
| SNORD115-3  | 0.735 | -0.9054 | 0.0013  |
| EPB41L4A    | 0.897 | -0.9054 | <0.0001 |
| TACSTD2     | 0.943 | -0.9054 | <0.0001 |
| KLRB1       | 0.918 | -0.9053 | <0.0001 |
| PPM1K       | 0.764 | -0.9049 | <0.0001 |
| IYD         | 0.841 | -0.9038 | <0.0001 |
| LINC00548   | 0.496 | -0.9022 | <0.0001 |
| LDB2        | 0.921 | -0.9021 | <0.0001 |
| MXRA5       | 0.918 | -0.9003 | <0.0001 |
| NOSTRIN     | 0.91  | -0.9    | <0.0001 |
| C11orf54    | 0.749 | -0.8999 | <0.0001 |
| PEX11G      | 0.773 | -0.8999 | <0.0001 |
| EXOC3L4     | 0.831 | -0.899  | <0.0001 |
| PPFIBP1     | 0.839 | -0.899  | <0.0001 |
| IGLV3-25    | 0.849 | -0.8985 | <0.0001 |
| CRISPLD2    | 0.889 | -0.8985 | <0.0001 |
| CD160       | 0.887 | -0.8976 | <0.0001 |
| TRIM22      | 0.915 | -0.8976 | <0.0001 |
| LTBP4       | 0.906 | -0.8971 | <0.0001 |
| SNORD115-27 | 0.59  | -0.8967 | <0.0001 |
| IGKV6-21    | 0.702 | -0.8966 | <0.0001 |
| HAO1        | 0.699 | -0.8963 | <0.0001 |
| RBM22P2     | 0.629 | -0.8962 | 0.004   |
| SIGLEC16    | 0.862 | -0.8959 | <0.0001 |
| AVP11       | 0.804 | -0.8949 | <0.0001 |
| LINC00907   | 0.972 | -0.8948 | 0.0265  |
| GLOD5       | 0.786 | -0.8944 | <0.0001 |
| COMT        | 0.895 | -0.8942 | <0.0001 |
| PHGDH       | 0.889 | -0.8939 | <0.0001 |

|              |       |         |         |
|--------------|-------|---------|---------|
| CR1          | 0.939 | -0.8939 | <0.0001 |
| CLDN34       | 0.422 | -0.8938 | <0.0001 |
| MAP2K3       | 0.927 | -0.8937 | <0.0001 |
| FOXF1        | 0.94  | -0.8934 | <0.0001 |
| TARID        | 0.078 | -0.8933 | <0.0001 |
| MEIS3P2      | 0.598 | -0.8931 | <0.0001 |
| MMRN1        | 0.926 | -0.8921 | <0.0001 |
| ALDH1B1      | 0.931 | -0.8906 | <0.0001 |
| ABCC9        | 0.883 | -0.8905 | <0.0001 |
| TNXB         | 0.964 | -0.8892 | <0.0001 |
| TMEM256      | 0.878 | -0.8884 | <0.0001 |
| PCAT19       | 0.91  | -0.8882 | 0.001   |
| SLCO1B7      | 0.899 | -0.888  | <0.0001 |
| SLC35D1      | 0.921 | -0.8874 | <0.0001 |
| FPR1         | 0.933 | -0.8874 | <0.0001 |
| ADGRL2       | 0.36  | -0.8871 | <0.0001 |
| PLPP4        | 0.814 | -0.8869 | 0.0128  |
| PTGDR        | 0.915 | -0.8869 | <0.0001 |
| SLC38A4      | 0.778 | -0.8864 | <0.0001 |
| CTBS         | 0.913 | -0.8863 | <0.0001 |
| MROH8        | 0.928 | -0.8861 | <0.0001 |
| EOMES        | 0.789 | -0.886  | <0.0001 |
| IGKV2-24     | 0.73  | -0.8859 | <0.0001 |
| KLRD1        | 0.91  | -0.8859 | <0.0001 |
| CLIC6        | 0.784 | -0.8856 | <0.0001 |
| LOC101928858 | 0.543 | -0.8853 | 0.0198  |
| PSMA3-AS1    | 0.712 | -0.8847 | 0.0027  |
| SARAF        | 0.182 | -0.8846 | <0.0001 |
| MASP2        | 0.743 | -0.8846 | <0.0001 |
| MEIS3P1      | 0.833 | -0.8843 | <0.0001 |
| RAB17        | 0.788 | -0.8833 | <0.0001 |
| RBL2         | 0.917 | -0.8828 | <0.0001 |
| STOM         | 0.88  | -0.8827 | <0.0001 |

|              |       |         |         |
|--------------|-------|---------|---------|
| PROS1        | 0.896 | -0.8824 | <0.0001 |
| NUPR2        | 0.192 | -0.8821 | <0.0001 |
| MTND5P1      | 0.804 | -0.8818 | 0.0403  |
| PSD4         | 0.935 | -0.8818 | <0.0001 |
| LILRA5       | 0.922 | -0.8817 | <0.0001 |
| TMEM154      | 0.798 | -0.8809 | <0.0001 |
| ERRFI1       | 0.795 | -0.8808 | <0.0001 |
| OLFM1        | 0.92  | -0.8806 | <0.0001 |
| LECT2        | 0.816 | -0.8802 | <0.0001 |
| LOC100132741 | 0.713 | -0.8799 | 0.0184  |
| TMEM47       | 0.89  | -0.8798 | <0.0001 |
| CD69         | 0.899 | -0.8794 | <0.0001 |
| CYP2C18      | 0.894 | -0.8793 | <0.0001 |
| EVA1A        | 0.586 | -0.8792 | <0.0001 |
| PGM1         | 0.897 | -0.8781 | <0.0001 |
| AASS         | 0.821 | -0.8772 | <0.0001 |
| IGHV3-23     | 0.858 | -0.877  | 0.0024  |
| ST8SIA6      | 0.884 | -0.8768 | <0.0001 |
| PDXDC2P      | 0.954 | -0.8761 | 0.0173  |
| PRSS8        | 0.834 | -0.8758 | <0.0001 |
| ADCY1        | 0.947 | -0.8758 | <0.0001 |
| HAAO         | 0.921 | -0.8755 | <0.0001 |
| CFAP69       | 0.861 | -0.8747 | 0.0092  |
| SATB1        | 0.929 | -0.8744 | <0.0001 |
| DNALI1       | 0.9   | -0.8743 | <0.0001 |
| MIR642B      | 0     | -0.8737 | <0.0001 |
| FAM110C      | 0.791 | -0.8734 | <0.0001 |
| PWAR1        | 0.455 | -0.8733 | <0.0001 |
| AZGP1        | 0.905 | -0.8731 | <0.0001 |
| NUGGC        | 0.191 | -0.8723 | <0.0001 |
| HSD11B1      | 0.835 | -0.8719 | <0.0001 |
| SPIC         | 0.834 | -0.8715 | <0.0001 |
| SETP17       | 0.317 | -0.8714 | <0.0001 |

|             |       |         |         |
|-------------|-------|---------|---------|
| LINC01239   | 0     | -0.8713 | <0.0001 |
| RNF180      | 0.826 | -0.8706 | <0.0001 |
| ATP11C      | 0.765 | -0.8705 | <0.0001 |
| LRRC4       | 0.953 | -0.8702 | <0.0001 |
| IGLV7-46    | 0.711 | -0.8701 | <0.0001 |
| UGT2B7      | 0.935 | -0.8696 | <0.0001 |
| ADAMTS1     | 0.942 | -0.8695 | <0.0001 |
| SLC2A9      | 0.802 | -0.8686 | <0.0001 |
| RAB33B      | 0.853 | -0.8685 | <0.0001 |
| SAMD5       | 0.863 | -0.8683 | <0.0001 |
| SNORD115-15 | 0.81  | -0.8681 | 0.0157  |
| SAA2-SAA4   | 0.297 | -0.8674 | <0.0001 |
| MTHFD2L     | 0.882 | -0.867  | <0.0001 |
| A2M         | 0.906 | -0.8667 | <0.0001 |
| CYFIP2      | 0.842 | -0.8662 | <0.0001 |
| C21orf91    | 0.941 | -0.8661 | <0.0001 |
| S100A12     | 0.903 | -0.8656 | <0.0001 |
| HEPACAM     | 0.902 | -0.8655 | <0.0001 |
| EIF4E3      | 0.839 | -0.8651 | <0.0001 |
| JDP2        | 0.891 | -0.8649 | <0.0001 |
| SNORD115-23 | 0     | -0.8647 | <0.0001 |
| ADH1A       | 0.856 | -0.8633 | <0.0001 |
| FAXDC2      | 0.81  | -0.863  | <0.0001 |
| LRRK2       | 0.575 | -0.8626 | <0.0001 |
| CLN8        | 0.931 | -0.8626 | <0.0001 |
| NCOR1       | 0.873 | -0.8625 | <0.0001 |
| FOLH1       | 0.945 | -0.8625 | <0.0001 |
| GRHPR       | 0.928 | -0.8619 | <0.0001 |
| SNORD115-44 | 0.946 | -0.8618 | 0.0274  |
| RBP1        | 0.857 | -0.8618 | <0.0001 |
| SNORD115-1  | 0.91  | -0.8614 | 0.0095  |
| POU6F2-AS1  | 0.552 | -0.8611 | <0.0001 |
| ACAT1       | 0.937 | -0.8607 | <0.0001 |

|              |       |         |         |
|--------------|-------|---------|---------|
| GRTP1-AS1    | 0.974 | -0.8606 | 0.0278  |
| PON3         | 0.89  | -0.8585 | <0.0001 |
| EMILIN1      | 0.916 | -0.8583 | <0.0001 |
| MYO1F        | 0.891 | -0.8573 | <0.0001 |
| USP15        | 0.91  | -0.8571 | <0.0001 |
| NRG1         | 0.786 | -0.857  | <0.0001 |
| CLEC4GP1     | 0.885 | -0.857  | <0.0001 |
| GABRP        | 0.891 | -0.8569 | <0.0001 |
| MST1L        | 0.953 | -0.856  | 0.0014  |
| SLC23A2      | 0.927 | -0.8551 | <0.0001 |
| TMEM56-RWDD3 | 0.331 | -0.855  | 0.0065  |
| GLP2R        | 0.954 | -0.855  | <0.0001 |
| GAS1         | 0.907 | -0.8549 | <0.0001 |
| MIR4698      | 0.592 | -0.8548 | 0.0329  |
| FCRL6        | 0.839 | -0.8547 | <0.0001 |
| LOC157273    | 0.716 | -0.8546 | <0.0001 |
| LINC01337    | 0.294 | -0.8544 | <0.0001 |
| LTK          | 0.948 | -0.8541 | <0.0001 |
| IGKV1D-16    | 0.839 | -0.8539 | 0.0002  |
| ABHD6        | 0.865 | -0.8536 | <0.0001 |
| TREH         | 0.845 | -0.8535 | <0.0001 |
| GK           | 0.911 | -0.8532 | <0.0001 |
| LOC100506388 | 0.708 | -0.8523 | <0.0001 |
| ECM2         | 0.913 | -0.8518 | <0.0001 |
| PHLDB2       | 0.833 | -0.8517 | <0.0001 |
| SORBS1       | 0.922 | -0.8515 | <0.0001 |
| TSPYL5       | 0.936 | -0.8515 | <0.0001 |
| ABI3BP       | 0.836 | -0.8511 | <0.0001 |
| PRELP        | 0.918 | -0.851  | <0.0001 |
| TMEM220-AS1  | 0     | -0.8508 | <0.0001 |
| TMEM198B     | 0.93  | -0.8499 | 0.0002  |
| CILP         | 0.932 | -0.8497 | <0.0001 |
| PHLDA1       | 0.946 | -0.8497 | <0.0001 |

|              |       |         |         |
|--------------|-------|---------|---------|
| SHMT1        | 0.899 | -0.8496 | <0.0001 |
| HPS5         | 0.922 | -0.8496 | <0.0001 |
| ADAMTSL3     | 0.795 | -0.8493 | <0.0001 |
| TIAM1        | 0.938 | -0.8491 | <0.0001 |
| IGLC2        | 0.745 | -0.8485 | 0.0011  |
| IGHV1-2      | 0.721 | -0.8479 | 0.004   |
| TMEM25       | 0.856 | -0.8474 | <0.0001 |
| PIK3C2G      | 0.744 | -0.8469 | <0.0001 |
| IGHV3-73     | 0.876 | -0.8458 | 0.0012  |
| RBM5-AS1     | 0.476 | -0.8456 | <0.0001 |
| IL4R         | 0.937 | -0.8451 | <0.0001 |
| CYP17A1-AS1  | 0.159 | -0.845  | <0.0001 |
| IGHV3-48     | 0.8   | -0.8448 | <0.0001 |
| LOC101927972 | 0     | -0.8445 | <0.0001 |
| SLC13A5      | 0.674 | -0.8443 | <0.0001 |
| CA5A         | 0.853 | -0.8442 | <0.0001 |
| GADD45G      | 0.916 | -0.8442 | <0.0001 |
| RGN          | 0.896 | -0.8441 | <0.0001 |
| TMEM100      | 0.869 | -0.8439 | <0.0001 |
| A1BG         | 0.915 | -0.8433 | <0.0001 |
| ASL          | 0.929 | -0.8425 | <0.0001 |
| IGHV3-13     | 0.87  | -0.8421 | 0.0099  |
| TMEM132E     | 0.91  | -0.8421 | <0.0001 |
| IGKV3-11     | 0.877 | -0.8418 | 0.006   |
| RNA5SP356    | 0     | -0.8416 | <0.0001 |
| AKR7L        | 0.899 | -0.8415 | <0.0001 |
| IFITM10      | 0.92  | -0.8412 | <0.0001 |
| HEPN1        | 0.909 | -0.841  | <0.0001 |
| PLGLB2       | 0.818 | -0.8408 | <0.0001 |
| RASSF5       | 0.796 | -0.8403 | <0.0001 |
| IGKV3D-15    | 0.924 | -0.8402 | 0.0321  |
| OAT          | 0.894 | -0.8402 | <0.0001 |
| LYRM1        | 0.78  | -0.8401 | <0.0001 |

|              |       |         |         |
|--------------|-------|---------|---------|
| DUSP6        | 0.918 | -0.8397 | <0.0001 |
| PTGIR        | 0.938 | -0.8396 | <0.0001 |
| DMD          | 0.906 | -0.8391 | <0.0001 |
| SLC28A1      | 0.919 | -0.8387 | <0.0001 |
| CFD          | 0.929 | -0.8387 | <0.0001 |
| MME-AS1      | 0.809 | -0.8386 | 0.0022  |
| IER2         | 0.942 | -0.8383 | <0.0001 |
| HDAC6        | 0.906 | -0.8373 | <0.0001 |
| MTFR1L       | 0.804 | -0.8372 | <0.0001 |
| GCSHP3       | 0.299 | -0.8371 | <0.0001 |
| TGFBR3       | 0.891 | -0.8371 | <0.0001 |
| GOT1         | 0.923 | -0.8369 | <0.0001 |
| SLFNL1-AS1   | 0.964 | -0.8368 | 0.024   |
| QDPR         | 0.926 | -0.8366 | <0.0001 |
| GPT          | 0.918 | -0.8362 | <0.0001 |
| IGHA1        | 0.852 | -0.8361 | <0.0001 |
| TAPT1        | 0.856 | -0.8354 | <0.0001 |
| CYS1         | 0.928 | -0.8352 | <0.0001 |
| PTPN13       | 0.924 | -0.835  | <0.0001 |
| RNA5SP404    | 0.887 | -0.8346 | 0.0046  |
| GATA6-AS1    | 0.954 | -0.8332 | 0.0232  |
| ITIH4-AS1    | 0.763 | -0.8331 | 0.0007  |
| EIF5         | 0.943 | -0.8331 | <0.0001 |
| ART4         | 0.867 | -0.833  | <0.0001 |
| GPR83        | 0.661 | -0.8325 | <0.0001 |
| SEC62        | 0.77  | -0.8318 | <0.0001 |
| PSMD6-AS2    | 0.961 | -0.8316 | 0.0158  |
| HAL          | 0.877 | -0.8316 | <0.0001 |
| KRTCAP3      | 0.819 | -0.8306 | <0.0001 |
| SAT1         | 0.942 | -0.8305 | <0.0001 |
| SLCO2B1      | 0.911 | -0.8297 | <0.0001 |
| ABLIM3       | 0.916 | -0.8295 | <0.0001 |
| LOC100128076 | 0.054 | -0.8289 | <0.0001 |



|            |       |         |         |
|------------|-------|---------|---------|
| PTN        | 0.934 | -0.8285 | <0.0001 |
| WFDC1      | 0.918 | -0.8279 | <0.0001 |
| NPY5R      | 0.938 | -0.8277 | <0.0001 |
| AIRN       | 0.452 | -0.8275 | <0.0001 |
| IGLV3-21   | 0.904 | -0.8274 | 0.0133  |
| FAM229B    | 0.316 | -0.8273 | <0.0001 |
| PDK4       | 0.836 | -0.8271 | <0.0001 |
| CPB2-AS1   | 0.788 | -0.8269 | 0.0017  |
| GZMK       | 0.921 | -0.8269 | <0.0001 |
| SNORD115-7 | 0.435 | -0.8266 | <0.0001 |
| CAMK4      | 0.933 | -0.8266 | <0.0001 |
| S100A8     | 0.925 | -0.8265 | <0.0001 |
| TRPV6      | 0.925 | -0.8263 | <0.0001 |
| ZDBF2      | 0.891 | -0.8261 | <0.0001 |
| SCP2       | 0.862 | -0.8253 | <0.0001 |
| DCXR       | 0.909 | -0.8246 | <0.0001 |
| CES4A      | 0.84  | -0.8243 | <0.0001 |
| SLC25A25   | 0.796 | -0.8242 | <0.0001 |
| CHRD       | 0.919 | -0.8239 | <0.0001 |
| FGF14-AS2  | 0.352 | -0.8238 | <0.0001 |
| SLC6A12    | 0.912 | -0.8237 | <0.0001 |
| SNORA28    | 0.869 | -0.8232 | <0.0001 |
| TMIGD3     | 0.855 | -0.8231 | 0.0487  |
| GADD45A    | 0.92  | -0.8226 | <0.0001 |
| SERPING1   | 0.928 | -0.822  | <0.0001 |
| PCBP1-AS1  | 0.955 | -0.8218 | 0.0116  |
| IFT46      | 0.749 | -0.8217 | <0.0001 |
| CHIC2      | 0.915 | -0.8215 | <0.0001 |
| BASP1      | 0.918 | -0.821  | <0.0001 |
| AMPD1      | 0.926 | -0.8209 | <0.0001 |
| THBD       | 0.944 | -0.8207 | <0.0001 |
| HPX        | 0.923 | -0.8202 | <0.0001 |
| MTND5P11   | 0     | -0.82   | <0.0001 |

|             |       |         |         |
|-------------|-------|---------|---------|
| TMEM178A    | 0.752 | -0.82   | <0.0001 |
| GGTLC3      | 0.424 | -0.8199 | <0.0001 |
| TJP2        | 0.934 | -0.8195 | <0.0001 |
| IGHV4-61    | 0.836 | -0.8192 | 0.0064  |
| TRGC2       | 0.793 | -0.8192 | 0.0168  |
| PRIMA1      | 0.906 | -0.8189 | <0.0001 |
| PPARGC1A    | 0.749 | -0.8187 | <0.0001 |
| STX11       | 0.853 | -0.8183 | <0.0001 |
| C1QTNF7     | 0.824 | -0.8182 | <0.0001 |
| NCAM1       | 0.942 | -0.818  | <0.0001 |
| IGHV1-18    | 0.787 | -0.8179 | 0.0011  |
| NT5DC1      | 0.549 | -0.8179 | <0.0001 |
| CDNF        | 0.884 | -0.8179 | <0.0001 |
| KCNK6       | 0.805 | -0.8177 | <0.0001 |
| RHOB        | 0.931 | -0.8177 | <0.0001 |
| RMDN2       | 0.827 | -0.8173 | <0.0001 |
| TM6SF2      | 0.854 | -0.8156 | <0.0001 |
| APOL1       | 0.788 | -0.8151 | <0.0001 |
| HCLS1       | 0.925 | -0.8151 | <0.0001 |
| LILRB1      | 0.936 | -0.815  | <0.0001 |
| LINC01869   | 0.718 | -0.8141 | 0.0055  |
| LINC00417   | 0     | -0.8139 | <0.0001 |
| LAMC3       | 0.787 | -0.8125 | <0.0001 |
| HS3ST3B1    | 0.892 | -0.812  | <0.0001 |
| ID3         | 0.917 | -0.8114 | <0.0001 |
| TLE4        | 0.898 | -0.8112 | <0.0001 |
| N4BP2L2-IT2 | 0.969 | -0.811  | 0.018   |
| MIR3156-3   | 0     | -0.8108 | <0.0001 |
| FBXO8       | 0.74  | -0.8105 | <0.0001 |
| MTND6P21    | 0     | -0.8103 | <0.0001 |
| VNN1        | 0.916 | -0.8092 | <0.0001 |
| TTPAL       | 0.834 | -0.8089 | <0.0001 |
| PINK1       | 0.892 | -0.8089 | <0.0001 |

|             |       |         |         |
|-------------|-------|---------|---------|
| IGHG3       | 0.918 | -0.8088 | 0.0009  |
| PROSER2-AS1 | 0.95  | -0.8086 | 0.0065  |
| CYP2C58P    | 0.366 | -0.8072 | <0.0001 |
| TBX15       | 0.865 | -0.8068 | <0.0001 |
| KLRK1       | 0.954 | -0.8068 | <0.0001 |
| ENPEP       | 0.898 | -0.8063 | <0.0001 |
| ITGB2-AS1   | 0.277 | -0.8058 | <0.0001 |
| SLCO1B1     | 0.766 | -0.8055 | <0.0001 |
| MBNL2       | 0.901 | -0.8052 | <0.0001 |
| CD81        | 0.915 | -0.8049 | <0.0001 |
| GPR146      | 0.904 | -0.8046 | <0.0001 |
| SLC1A1      | 0.863 | -0.8044 | <0.0001 |
| C9orf72     | 0.798 | -0.8043 | <0.0001 |
| TRGV8       | 0     | -0.8042 | <0.0001 |
| LRG1        | 0.709 | -0.804  | <0.0001 |
| LOC441488   | 0.901 | -0.8036 | 0.0328  |
| ACSL5       | 0.771 | -0.8036 | <0.0001 |
| CCDC71L     | 0.809 | -0.8036 | <0.0001 |
| RXFP1       | 0.896 | -0.8034 | <0.0001 |
| IGHV3-53    | 0.792 | -0.8032 | 0.0025  |
| LINC00885   | 0.692 | -0.8031 | <0.0001 |
| DEFA3       | 0.873 | -0.8028 | <0.0001 |
| CTSO        | 0.92  | -0.8026 | <0.0001 |
| YPEL2       | 0.736 | -0.8023 | <0.0001 |
| CXCR2       | 0.875 | -0.8017 | <0.0001 |
| MIR1260A    | 0     | -0.8013 | <0.0001 |
| PCBP2P1     | 0     | -0.8012 | <0.0001 |
| CLYBL       | 0.823 | -0.8011 | <0.0001 |
| LILRB2      | 0.895 | -0.8008 | <0.0001 |
| RAB25       | 0.932 | -0.8006 | <0.0001 |
| RAB20       | 0.773 | -0.7998 | <0.0001 |
| PHYKPL      | 0.949 | -0.7997 | 0.0015  |
| C2-AS1      | 0.645 | -0.7991 | 0.0496  |

|           |       |         |         |
|-----------|-------|---------|---------|
| ANXA8     | 0.879 | -0.7985 | <0.0001 |
| TTY4B     | 0.886 | -0.7974 | 0.0096  |
| DHRS12    | 0.789 | -0.7973 | <0.0001 |
| MPDZ      | 0.908 | -0.797  | <0.0001 |
| CNGA1     | 0.906 | -0.7957 | <0.0001 |
| IGKV1-9   | 0.705 | -0.7956 | 0.0003  |
| SLC6A13   | 0.949 | -0.7956 | <0.0001 |
| MIR3180-2 | 0     | -0.7953 | <0.0001 |
| SIGLEC9   | 0.931 | -0.7952 | <0.0001 |
| GFRA1     | 0.731 | -0.7949 | <0.0001 |
| SLC25A15  | 0.81  | -0.7942 | <0.0001 |
| SAT2      | 0.727 | -0.7937 | <0.0001 |
| CFHR3     | 0.771 | -0.7937 | <0.0001 |
| CFL1P6    | 0     | -0.7935 | <0.0001 |
| MIR3605   | 0     | -0.7934 | 0.0016  |
| CNTN4-AS1 | 0.419 | -0.793  | <0.0001 |
| LILRA2    | 0.926 | -0.7928 | <0.0001 |
| MRPL35P2  | 0     | -0.7919 | <0.0001 |
| CYP2B7P   | 0.924 | -0.7917 | 0.0002  |
| IGHV3-11  | 0.877 | -0.7912 | 0.01    |
| NADK2     | 0.571 | -0.7911 | <0.0001 |
| AR        | 0.928 | -0.7904 | <0.0001 |
| SERPINA10 | 0.716 | -0.7898 | <0.0001 |
| IGLV2-18  | 0.687 | -0.7895 | 0.0002  |
| ANG       | 0.885 | -0.7894 | <0.0001 |
| LEAP2     | 0.664 | -0.7893 | <0.0001 |
| KRT17P5   | 0.743 | -0.7891 | <0.0001 |
| MOGAT1    | 0.892 | -0.789  | <0.0001 |
| IGKV3-7   | 0.898 | -0.7885 | 0.0448  |
| MIR4524A  | 0.107 | -0.7885 | <0.0001 |
| SNX29P1   | 0.744 | -0.7885 | <0.0001 |
| ANGPTL3   | 0.594 | -0.7883 | <0.0001 |
| HPD       | 0.853 | -0.788  | <0.0001 |

|            |       |         |         |
|------------|-------|---------|---------|
| FGD2       | 0.82  | -0.7878 | <0.0001 |
| ACADM      | 0.91  | -0.7871 | <0.0001 |
| PDGFC      | 0.905 | -0.7869 | <0.0001 |
| LAMA2      | 0.886 | -0.7867 | <0.0001 |
| GSPT2      | 0.918 | -0.7861 | <0.0001 |
| MGMT       | 0.934 | -0.7861 | <0.0001 |
| KDM6B      | 0.884 | -0.786  | <0.0001 |
| SH3YL1     | 0.923 | -0.7859 | <0.0001 |
| PCOLCE     | 0.911 | -0.7858 | <0.0001 |
| MCEE       | 0.812 | -0.7854 | <0.0001 |
| MTND2P28   | 0.737 | -0.7852 | 0.0303  |
| CDH23      | 0.789 | -0.7848 | <0.0001 |
| RARB       | 0.91  | -0.7848 | <0.0001 |
| IKBKGP1    | 0     | -0.7845 | <0.0001 |
| IL2RB      | 0.914 | -0.7845 | <0.0001 |
| SPTBN2     | 0.935 | -0.7842 | <0.0001 |
| PGM5       | 0.917 | -0.7838 | <0.0001 |
| IGKV1-17   | 0.791 | -0.7837 | 0.003   |
| FPR2       | 0.784 | -0.7836 | <0.0001 |
| SYNPO2     | 0.801 | -0.7834 | <0.0001 |
| SLC25A27   | 0.885 | -0.7834 | <0.0001 |
| STARD4-AS1 | 0.211 | -0.7829 | <0.0001 |
| ENTPD8     | 0.756 | -0.7828 | <0.0001 |
| LRRC3      | 0.901 | -0.7826 | <0.0001 |
| LINC00659  | 0.973 | -0.7823 | 0.0464  |
| SLC16A2    | 0.919 | -0.7823 | <0.0001 |
| CAPN3      | 0.958 | -0.7822 | <0.0001 |
| ID2-AS1    | 0.7   | -0.7819 | 0.0406  |
| SERPINF2   | 0.883 | -0.7819 | <0.0001 |
| TNFRSF10B  | 0.861 | -0.7816 | <0.0001 |
| KCNJ15     | 0.845 | -0.7809 | <0.0001 |
| FAH        | 0.854 | -0.7808 | <0.0001 |
| STAT4      | 0.921 | -0.7808 | <0.0001 |

|              |       |         |         |
|--------------|-------|---------|---------|
| CTNNA3       | 0.824 | -0.7804 | <0.0001 |
| CBSL         | 0.642 | -0.78   | 0.0085  |
| LOC100130345 | 0     | -0.78   | <0.0001 |
| ND3          | 0.716 | -0.7798 | 0.0021  |
| GAS6-AS1     | 0.509 | -0.7787 | <0.0001 |
| RASSF8-AS1   | 0.773 | -0.7777 | <0.0001 |
| SMARCA2      | 0.898 | -0.7777 | <0.0001 |
| SMOC1        | 0.745 | -0.7776 | <0.0001 |
| RPH3AL       | 0.866 | -0.7772 | <0.0001 |
| RAB6C-AS1    | 0.817 | -0.7768 | 0.0362  |
| ATP8B4       | 0.808 | -0.7765 | <0.0001 |
| TRPV1        | 0.955 | -0.776  | <0.0001 |
| GK-IT1       | 0.287 | -0.7758 | <0.0001 |
| EHHADH       | 0.901 | -0.7757 | <0.0001 |
| PIGV         | 0.796 | -0.7753 | <0.0001 |
| ACF          | 0.521 | -0.7752 | 0.0008  |
| GPR180       | 0.712 | -0.775  | <0.0001 |
| PTS          | 0.949 | -0.7748 | <0.0001 |
| SLC27A2      | 0.882 | -0.7747 | <0.0001 |
| SERPINB9     | 0.931 | -0.7747 | <0.0001 |
| IGKV1-6      | 0.82  | -0.7746 | 0.0065  |
| RORA         | 0.915 | -0.7746 | <0.0001 |
| IGLV10-54    | 0.693 | -0.7742 | 0.0002  |
| SNORD10      | 0.433 | -0.7729 | <0.0001 |
| IGFBP4       | 0.94  | -0.7724 | <0.0001 |
| GOLGA8O      | 0.884 | -0.7722 | 0.0049  |
| RNU1-75P     | 0.84  | -0.7722 | 0.014   |
| LOC728811    | 0.687 | -0.7721 | <0.0001 |
| PDE8B        | 0.729 | -0.7714 | <0.0001 |
| LINC00538    | 0.736 | -0.7712 | 0.0066  |
| TRIB1        | 0.937 | -0.7709 | <0.0001 |
| PYROXD2      | 0.599 | -0.7708 | <0.0001 |
| TDRP         | 0.9   | -0.7706 | <0.0001 |

|            |       |         |         |
|------------|-------|---------|---------|
| ZADH2      | 0.894 | -0.7702 | <0.0001 |
| RRN3P1     | 0.947 | -0.77   | 0.0002  |
| IGF2       | 0.905 | -0.7699 | <0.0001 |
| CYGB       | 0.906 | -0.7695 | <0.0001 |
| IGKV1D-43  | 0.913 | -0.7694 | 0.0124  |
| RPS12P20   | 0.389 | -0.7693 | <0.0001 |
| PTPRVP     | 0.419 | -0.7693 | <0.0001 |
| ACMSD      | 0.81  | -0.7691 | <0.0001 |
| GNPNAT1    | 0.899 | -0.7691 | <0.0001 |
| ATF5       | 0.852 | -0.7688 | <0.0001 |
| CD226      | 0.911 | -0.7688 | <0.0001 |
| TNFRSF10D  | 0.887 | -0.7678 | <0.0001 |
| NIT2       | 0.775 | -0.7676 | <0.0001 |
| LST1       | 0.95  | -0.7676 | <0.0001 |
| ALAS1      | 0.93  | -0.7665 | <0.0001 |
| PLIN5      | 0.895 | -0.7661 | <0.0001 |
| PRG4       | 0.865 | -0.766  | <0.0001 |
| PLA2R1     | 0.805 | -0.7658 | <0.0001 |
| EGR2       | 0.922 | -0.7657 | <0.0001 |
| CLEC9A     | 0.927 | -0.7656 | <0.0001 |
| PRR5       | 0.929 | -0.7651 | <0.0001 |
| CCDC18-AS1 | 0.438 | -0.765  | <0.0001 |
| HEBP1      | 0.851 | -0.765  | <0.0001 |
| ABCA6      | 0.742 | -0.7644 | <0.0001 |
| EPHA3      | 0.887 | -0.7644 | <0.0001 |
| SDC3       | 0.941 | -0.7638 | <0.0001 |
| VSIG2      | 0.737 | -0.7637 | <0.0001 |
| KLF7-IT1   | 0.184 | -0.7635 | <0.0001 |
| PTGER2     | 0.864 | -0.7635 | <0.0001 |
| APOA1      | 0.695 | -0.7634 | <0.0001 |
| PABPC1P7   | 0     | -0.7631 | <0.0001 |
| SLCO4C1    | 0.838 | -0.7631 | <0.0001 |
| CST7       | 0.766 | -0.763  | <0.0001 |

|              |       |         |         |
|--------------|-------|---------|---------|
| LEPR         | 0.737 | -0.7629 | <0.0001 |
| NDFIP2       | 0.826 | -0.7624 | <0.0001 |
| RBP5         | 0.748 | -0.7623 | <0.0001 |
| FGL2         | 0.94  | -0.7623 | <0.0001 |
| IGHG1        | 0.967 | -0.762  | 0.0006  |
| PCK2         | 0.908 | -0.762  | <0.0001 |
| CFHR4        | 0.92  | -0.7614 | <0.0001 |
| CLEC10A      | 0.913 | -0.7613 | <0.0001 |
| MIR514A1     | 0     | -0.761  | <0.0001 |
| FCGRT        | 0.924 | -0.7609 | <0.0001 |
| FAM83A-AS1   | 0.402 | -0.7607 | <0.0001 |
| TXK          | 0.927 | -0.7603 | <0.0001 |
| PPFIBP2      | 0.782 | -0.7598 | <0.0001 |
| PRRG4        | 0.727 | -0.7597 | <0.0001 |
| MAMDC2       | 0.872 | -0.7594 | <0.0001 |
| LINC-PINT    | 0.919 | -0.7588 | 0.0067  |
| PCDH18       | 0.692 | -0.7584 | <0.0001 |
| CRYL1        | 0.713 | -0.7584 | <0.0001 |
| PRSS53       | 0.935 | -0.7584 | <0.0001 |
| FAM9B        | 0.669 | -0.7579 | <0.0001 |
| SYT10        | 0.916 | -0.7576 | <0.0001 |
| LIMS4        | 0.346 | -0.7574 | <0.0001 |
| IGKC         | 0.852 | -0.7573 | <0.0001 |
| SPSB3        | 0.944 | -0.7572 | <0.0001 |
| TMC3-AS1     | 0     | -0.7566 | <0.0001 |
| GALNT16      | 0.846 | -0.7566 | <0.0001 |
| SMAD9        | 0.876 | -0.756  | <0.0001 |
| PODN         | 0.826 | -0.7556 | <0.0001 |
| MPDU1        | 0.84  | -0.7556 | <0.0001 |
| LOC100132686 | 0.761 | -0.7554 | <0.0001 |
| TSPAN9       | 0.85  | -0.7552 | <0.0001 |
| PON1         | 0.886 | -0.7548 | <0.0001 |
| CDC14B       | 0.859 | -0.7547 | <0.0001 |



|              |       |         |         |
|--------------|-------|---------|---------|
| ESRP2        | 0.918 | -0.7546 | <0.0001 |
| CYP4F3       | 0.918 | -0.7544 | <0.0001 |
| SOX6         | 0.639 | -0.7541 | <0.0001 |
| ALDOB        | 0.917 | -0.754  | <0.0001 |
| GFOD2        | 0.884 | -0.7538 | <0.0001 |
| CBS          | 0.89  | -0.7538 | <0.0001 |
| CHP1         | 0.793 | -0.7537 | <0.0001 |
| EPM2A        | 0.866 | -0.7534 | <0.0001 |
| SUN2         | 0.769 | -0.7533 | <0.0001 |
| CPN1         | 0.846 | -0.7533 | <0.0001 |
| GIMAP5       | 0.947 | -0.7533 | <0.0001 |
| FAAH2        | 0.67  | -0.7531 | <0.0001 |
| SLC16A5      | 0.714 | -0.7531 | <0.0001 |
| DAPK1        | 0.887 | -0.7529 | <0.0001 |
| ARHGAP9      | 0.842 | -0.7528 | <0.0001 |
| CPS1-IT1     | 0.802 | -0.7524 | <0.0001 |
| ADGRA1       | 0.597 | -0.752  | 0.0068  |
| APOL6        | 0.867 | -0.752  | <0.0001 |
| LOC100506688 | 0.399 | -0.7519 | <0.0001 |
| GJB2         | 0.884 | -0.7519 | <0.0001 |
| PLA2G12A     | 0.796 | -0.7518 | <0.0001 |
| LRRC55       | 0.934 | -0.7513 | <0.0001 |
| RNASE4       | 0.956 | -0.7507 | <0.0001 |
| IGKV2D-26    | 0.928 | -0.7502 | 0.033   |
| GIPC2        | 0.721 | -0.75   | <0.0001 |
| PDZRN3       | 0.798 | -0.7497 | <0.0001 |
| BACH2        | 0.855 | -0.7494 | <0.0001 |
| DUSP5        | 0.934 | -0.7492 | <0.0001 |
| MIR650       | 0     | -0.7491 | <0.0001 |
| RNA5SP46     | 0.811 | -0.7489 | 0.0009  |
| AKR7A2P1     | 0.739 | -0.7489 | <0.0001 |
| LINC01277    | 0.428 | -0.7488 | <0.0001 |
| IGLC7        | 0.734 | -0.7477 | 0.0013  |

|             |       |         |         |
|-------------|-------|---------|---------|
| HECTD2-AS1  | 0     | -0.7476 | 0.0401  |
| RNA5SP191   | 0.816 | -0.7473 | 0.0446  |
| IGKV1D-39   | 0     | -0.7473 | <0.0001 |
| ANXA3       | 0.922 | -0.747  | <0.0001 |
| RGS18       | 0.828 | -0.7469 | <0.0001 |
| PLCB2       | 0.92  | -0.7458 | <0.0001 |
| MAP2K4      | 0.934 | -0.7456 | <0.0001 |
| MIR4476     | 0.272 | -0.7447 | <0.0001 |
| TANGO6      | 0.724 | -0.7446 | <0.0001 |
| TEX26       | 0.779 | -0.7445 | <0.0001 |
| LIME1       | 0.95  | -0.7442 | <0.0001 |
| TSPAN12     | 0.649 | -0.7437 | <0.0001 |
| SLC6A16     | 0.867 | -0.743  | <0.0001 |
| RGL1        | 0.887 | -0.7428 | <0.0001 |
| SERPINB8    | 0.927 | -0.7425 | <0.0001 |
| F3          | 0.901 | -0.7422 | <0.0001 |
| NR4A3       | 0.917 | -0.7422 | <0.0001 |
| HS3ST3A1    | 0.83  | -0.7421 | <0.0001 |
| TMC8        | 0.835 | -0.7421 | <0.0001 |
| LIPC        | 0.819 | -0.742  | <0.0001 |
| ASNSP3      | 0.683 | -0.7402 | 0.0252  |
| ARAP2       | 0.816 | -0.7402 | <0.0001 |
| SLC37A4     | 0.892 | -0.7398 | <0.0001 |
| BEND4       | 0.835 | -0.7392 | <0.0001 |
| CP          | 0.896 | -0.7384 | <0.0001 |
| EPHB1       | 0.915 | -0.7383 | <0.0001 |
| PLG         | 0.897 | -0.7381 | <0.0001 |
| TBC1D2B     | 0.899 | -0.7381 | <0.0001 |
| KCNK5       | 0.875 | -0.7374 | <0.0001 |
| LINC00926   | 0.924 | -0.7372 | 0.0021  |
| SNORD115-35 | 0.916 | -0.737  | 0.0188  |
| SPAG7       | 0.873 | -0.7367 | <0.0001 |
| AQP7P3      | 0.753 | -0.7356 | 0.0006  |

|            |       |         |         |
|------------|-------|---------|---------|
| PRODH2     | 0.894 | -0.7356 | <0.0001 |
| FETUB      | 0.881 | -0.735  | <0.0001 |
| ZC3H13     | 0.922 | -0.7349 | <0.0001 |
| HNRNPA1P22 | 0     | -0.7348 | <0.0001 |
| ANGPTL4    | 0.877 | -0.7346 | <0.0001 |
| PNP        | 0.705 | -0.7345 | <0.0001 |
| SLC17A2    | 0.893 | -0.7344 | <0.0001 |
| MIR214     | 0.919 | -0.7343 | 0.0033  |
| RPS20P22   | 0.692 | -0.7339 | 0.0007  |
| CYB5D1     | 0.94  | -0.7339 | <0.0001 |
| CENPC      | 0.822 | -0.7336 | <0.0001 |
| IL10RA     | 0.905 | -0.7336 | <0.0001 |
| EDEM1      | 0.938 | -0.7333 | <0.0001 |
| IGLV3-12   | 0.702 | -0.7332 | 0.0005  |
| MT1XP1     | 0.465 | -0.7332 | <0.0001 |
| LILRA1     | 0.903 | -0.7331 | <0.0001 |
| DHRS4-AS1  | 0.612 | -0.7327 | <0.0001 |
| THBS1      | 0.932 | -0.7327 | <0.0001 |
| IGHV3-21   | 0.815 | -0.7325 | 0.0033  |
| RPL7L1P3   | 0.475 | -0.7325 | <0.0001 |
| IPCEF1     | 0.822 | -0.7323 | <0.0001 |
| KLF2       | 0.863 | -0.7322 | <0.0001 |
| NAALADL2   | 0.886 | -0.7321 | <0.0001 |
| FAM13A-AS1 | 0.916 | -0.732  | 0.0006  |
| HADH       | 0.915 | -0.732  | <0.0001 |
| IGKV1-8    | 0.893 | -0.7315 | 0.0448  |
| IL1B       | 0.9   | -0.7315 | <0.0001 |
| IL7R       | 0.895 | -0.7314 | <0.0001 |
| TCEAL7     | 0.695 | -0.7313 | <0.0001 |
| MS4A7      | 0.932 | -0.731  | <0.0001 |
| IGHV3-35   | 0.926 | -0.7307 | 0.0365  |
| IGHV3-43   | 0.723 | -0.7301 | <0.0001 |
| PSD3       | 0.918 | -0.7298 | <0.0001 |

|            |       |         |         |
|------------|-------|---------|---------|
| DLL1       | 0.836 | -0.7296 | <0.0001 |
| SLC25A18   | 0.779 | -0.729  | <0.0001 |
| SCARF1     | 0.933 | -0.729  | <0.0001 |
| HSD17B6    | 0.802 | -0.7289 | <0.0001 |
| MOB3C      | 0.835 | -0.7289 | <0.0001 |
| SNORD116-5 | 0.43  | -0.728  | <0.0001 |
| PPP2R2A    | 0.932 | -0.7278 | <0.0001 |
| SNORD115-2 | 0.38  | -0.7277 | <0.0001 |
| KLRG1      | 0.768 | -0.7274 | <0.0001 |
| PLPP3      | 0.684 | -0.7273 | 0.0087  |
| C16orf96   | 0.639 | -0.7272 | <0.0001 |
| ND5        | 0.84  | -0.727  | 0.0101  |
| TRBC1      | 0.963 | -0.7263 | 0.0026  |
| FAAH       | 0.922 | -0.726  | <0.0001 |
| SNORA24    | 0.826 | -0.7258 | <0.0001 |
| TCHH       | 0.873 | -0.7258 | <0.0001 |
| ACBD4      | 0.908 | -0.7258 | <0.0001 |
| NME5       | 0.898 | -0.7256 | <0.0001 |
| MMP23A     | 0.344 | -0.7255 | <0.0001 |
| SAMD3      | 0.622 | -0.7253 | <0.0001 |
| CCL2       | 0.926 | -0.7253 | <0.0001 |
| LINC00599  | 0.391 | -0.725  | <0.0001 |
| FAM90A25P  | 0.644 | -0.7244 | 0.0006  |
| PEAR1      | 0.862 | -0.724  | <0.0001 |
| TRANK1     | 0.598 | -0.7235 | <0.0001 |
| GRM8       | 0.897 | -0.7235 | <0.0001 |
| DLGAP1-AS3 | 0.345 | -0.7234 | <0.0001 |
| OAF        | 0.86  | -0.7233 | <0.0001 |
| SULT1E1    | 0.892 | -0.7226 | <0.0001 |
| LUM        | 0.886 | -0.7225 | <0.0001 |
| CCR1       | 0.944 | -0.7223 | <0.0001 |
| NR4A1      | 0.925 | -0.7222 | <0.0001 |
| CH25H      | 0.915 | -0.7221 | <0.0001 |

|              |       |         |         |
|--------------|-------|---------|---------|
| KLF11        | 0.826 | -0.7219 | <0.0001 |
| CPN2         | 0.687 | -0.7216 | <0.0001 |
| SLC31A2      | 0.929 | -0.7212 | <0.0001 |
| RIPK4        | 0.833 | -0.7208 | <0.0001 |
| SNORD115-17  | 0     | -0.7207 | <0.0001 |
| GBP7         | 0.581 | -0.7206 | <0.0001 |
| NLRC4        | 0.791 | -0.7206 | <0.0001 |
| KLHL36       | 0.928 | -0.7205 | <0.0001 |
| NR2F1        | 0.63  | -0.7201 | <0.0001 |
| MIR3158-2    | 0     | -0.7198 | <0.0001 |
| PIPOX        | 0.715 | -0.7196 | <0.0001 |
| SPNS2        | 0.744 | -0.7193 | <0.0001 |
| SYTL3        | 0.795 | -0.7191 | <0.0001 |
| NT5CP2       | 0.228 | -0.7188 | <0.0001 |
| SAMD4A       | 0.866 | -0.7184 | <0.0001 |
| FHL1         | 0.914 | -0.7182 | <0.0001 |
| FGB          | 0.806 | -0.7178 | <0.0001 |
| OXT          | 0.884 | -0.7173 | <0.0001 |
| ADNP-AS1     | 0     | -0.7171 | <0.0001 |
| ASGR2        | 0.906 | -0.7171 | <0.0001 |
| IGKV6D-21    | 0.765 | -0.7168 | 0.0037  |
| MIR3622A     | 0     | -0.7167 | <0.0001 |
| PANO1        | 0     | -0.7165 | <0.0001 |
| MYOT         | 0.848 | -0.7164 | <0.0001 |
| AGXT         | 0.883 | -0.7159 | <0.0001 |
| MIR3141      | 0.34  | -0.7158 | <0.0001 |
| HOOK1        | 0.865 | -0.715  | <0.0001 |
| ASPN         | 0.931 | -0.7148 | <0.0001 |
| LOC100652967 | 0     | -0.7147 | 0.0138  |
| MTTP         | 0.736 | -0.7146 | <0.0001 |
| CCNL1        | 0.906 | -0.714  | <0.0001 |
| IRAK3        | 0.832 | -0.7138 | <0.0001 |
| LINC00903    | 0     | -0.7135 | 0.0106  |

|             |       |         |         |
|-------------|-------|---------|---------|
| CYP4F12     | 0.911 | -0.7123 | <0.0001 |
| RPL7L1P9    | 0.601 | -0.7122 | 0.0147  |
| MEFV        | 0.925 | -0.7117 | <0.0001 |
| GIMAP4      | 0.935 | -0.7116 | <0.0001 |
| HERC5       | 0.771 | -0.7114 | <0.0001 |
| SNORD115-28 | 0.842 | -0.7113 | 0.0041  |
| TSPAN7      | 0.913 | -0.711  | <0.0001 |
| SLAIN1      | 0.848 | -0.7109 | <0.0001 |
| DOCK8       | 0.877 | -0.7109 | <0.0001 |
| RASGRP2     | 0.886 | -0.7107 | <0.0001 |
| KLHL15      | 0.897 | -0.7107 | <0.0001 |
| PRKCQ-AS1   | 0     | -0.7106 | <0.0001 |
| LYPD2       | 0.826 | -0.7104 | <0.0001 |
| ITGAD       | 0.923 | -0.7104 | <0.0001 |
| CARMIL3     | 0.833 | -0.7103 | 0.0412  |
| MIR4769     | 0.37  | -0.7101 | <0.0001 |
| ZNF385B     | 0.761 | -0.7101 | <0.0001 |
| LOC729080   | 0.748 | -0.7098 | <0.0001 |
| PDE11A      | 0.825 | -0.7094 | <0.0001 |
| PROK2       | 0.882 | -0.7084 | <0.0001 |
| KLK11       | 0.93  | -0.7084 | <0.0001 |
| PPBP        | 0.927 | -0.7082 | <0.0001 |
| LOC158434   | 0     | -0.7079 | <0.0001 |
| CYP4F24P    | 0.725 | -0.7078 | 0.0031  |
| ASGR1       | 0.857 | -0.7071 | <0.0001 |
| UBALD1      | 0.926 | -0.707  | 0.0006  |
| SMIM19      | 0.79  | -0.7069 | <0.0001 |
| PRKCB       | 0.74  | -0.7067 | <0.0001 |
| C4orf3      | 0.819 | -0.7066 | <0.0001 |
| MT2P1       | 0     | -0.7061 | <0.0001 |
| HYAL1       | 0.875 | -0.7055 | <0.0001 |
| SCD5        | 0.914 | -0.705  | <0.0001 |
| MT1B        | 0.939 | -0.7049 | <0.0001 |

|              |       |         |         |
|--------------|-------|---------|---------|
| ZNF462       | 0.707 | -0.7047 | <0.0001 |
| ATP13A4      | 0.871 | -0.7047 | <0.0001 |
| HMOX1        | 0.879 | -0.7044 | <0.0001 |
| EPOR         | 0.951 | -0.7044 | <0.0001 |
| IL6ST        | 0.939 | -0.704  | <0.0001 |
| TINAGL1      | 0.859 | -0.7038 | <0.0001 |
| CLUH         | 0.903 | -0.7038 | <0.0001 |
| KCNA3        | 0.891 | -0.703  | <0.0001 |
| RNF135       | 0.773 | -0.7029 | <0.0001 |
| GLIDR        | 0.342 | -0.7028 | <0.0001 |
| PCCA         | 0.907 | -0.7028 | <0.0001 |
| C4orf19      | 0.752 | -0.7027 | <0.0001 |
| BMP6         | 0.907 | -0.7027 | <0.0001 |
| FBXO21       | 0.843 | -0.7026 | <0.0001 |
| LIPG         | 0.854 | -0.7025 | <0.0001 |
| PARVG        | 0.801 | -0.7023 | <0.0001 |
| LOC101927811 | 0.372 | -0.7022 | <0.0001 |
| HID1-AS1     | 0     | -0.7021 | <0.0001 |
| AGPAT2       | 0.909 | -0.7021 | <0.0001 |
| PYHIN1       | 0.593 | -0.7019 | <0.0001 |
| LOC100506384 | 0     | -0.7013 | <0.0001 |
| TGDS         | 0.705 | -0.7012 | <0.0001 |
| FCN1         | 0.89  | -0.7011 | <0.0001 |
| LOC100126447 | 0.069 | -0.7001 | 0.011   |
| ARMC6        | 0.866 | -0.7    | <0.0001 |
| CMTM6        | 0.837 | -0.6998 | <0.0001 |
| C21orf62     | 0.905 | -0.6996 | <0.0001 |
| RPL7P14      | 0.314 | -0.6995 | <0.0001 |
| AKAP7        | 0.928 | -0.6995 | <0.0001 |
| DSEL         | 0.578 | -0.6993 | <0.0001 |
| PLIN2        | 0.833 | -0.6993 | <0.0001 |
| SOCS3        | 0.899 | -0.6992 | <0.0001 |
| OXNAD1       | 0.735 | -0.6987 | <0.0001 |

|              |       |         |         |
|--------------|-------|---------|---------|
| SERTAD1      | 0.915 | -0.6986 | <0.0001 |
| ZNF334       | 0.887 | -0.6983 | <0.0001 |
| LCP2         | 0.914 | -0.6982 | <0.0001 |
| CES5AP1      | 0.716 | -0.6981 | 0.0007  |
| IGKV1-37     | 0.552 | -0.698  | 0.0001  |
| MRGPRF       | 0.845 | -0.698  | <0.0001 |
| GRAP         | 0.935 | -0.6979 | <0.0001 |
| IGKV2-40     | 0.787 | -0.6976 | 0.0108  |
| GCSH         | 0.899 | -0.6971 | <0.0001 |
| MYL3         | 0.936 | -0.697  | <0.0001 |
| MAF          | 0.929 | -0.6966 | <0.0001 |
| TRGV10       | 0.647 | -0.6965 | 0.0003  |
| NFAM1        | 0.897 | -0.6965 | <0.0001 |
| CES5A        | 0.765 | -0.6964 | <0.0001 |
| CAND2        | 0.846 | -0.6964 | <0.0001 |
| PXMP2        | 0.926 | -0.6962 | <0.0001 |
| STK40        | 0.863 | -0.6957 | <0.0001 |
| TERF2IP      | 0.825 | -0.6956 | <0.0001 |
| SCGB1B2P     | 0.064 | -0.6954 | <0.0001 |
| SGCA         | 0.907 | -0.695  | <0.0001 |
| ISOC1        | 0.771 | -0.6947 | <0.0001 |
| LOC100506514 | 0     | -0.6946 | 0.0145  |
| APOC4        | 0.963 | -0.6945 | <0.0001 |
| LINC01482    | 0     | -0.6944 | <0.0001 |
| GRHL2        | 0.87  | -0.6932 | <0.0001 |
| PLP1         | 0.932 | -0.6931 | <0.0001 |
| ZMYND10-AS1  | 0.117 | -0.693  | <0.0001 |
| FAS          | 0.872 | -0.6927 | <0.0001 |
| LOC100240735 | 0.684 | -0.6922 | 0.0021  |
| USP38        | 0.852 | -0.692  | <0.0001 |
| IFITM1       | 0.917 | -0.692  | <0.0001 |
| PTPN3        | 0.953 | -0.6918 | <0.0001 |
| GXYLT1P3     | 0     | -0.6915 | <0.0001 |



|           |       |         |         |
|-----------|-------|---------|---------|
| FARP2     | 0.932 | -0.6915 | <0.0001 |
| ALDH4A1   | 0.928 | -0.6912 | <0.0001 |
| PRR26     | 0.865 | -0.6908 | <0.0001 |
| NRBF2     | 0.894 | -0.6906 | <0.0001 |
| LINC01018 | 0.691 | -0.6899 | <0.0001 |
| ARID3C    | 0.833 | -0.6898 | <0.0001 |
| SLC22A7   | 0.799 | -0.6897 | <0.0001 |
| IFNAR1    | 0.922 | -0.6897 | <0.0001 |
| MTND1P23  | 0     | -0.6894 | <0.0001 |
| LINC00939 | 0.954 | -0.6893 | 0.011   |
| GOLGA8Q   | 0.917 | -0.6892 | 0.0364  |
| NFIL3     | 0.94  | -0.689  | <0.0001 |
| MIR877    | 0.696 | -0.6889 | <0.0001 |
| TRPM8     | 0.92  | -0.6888 | <0.0001 |
| PFKFB1    | 0.858 | -0.6886 | <0.0001 |
| KCNJ8     | 0.85  | -0.6884 | <0.0001 |
| TTC19     | 0.853 | -0.6883 | <0.0001 |
| ENDOD1    | 0.853 | -0.6873 | <0.0001 |
| ACOX1     | 0.899 | -0.6873 | <0.0001 |
| CPS1      | 0.896 | -0.6872 | <0.0001 |
| PBX1      | 0.897 | -0.6866 | <0.0001 |
| PTPRD     | 0.856 | -0.6863 | <0.0001 |
| FCGR3A    | 0.868 | -0.6861 | <0.0001 |
| SLC17A1   | 0.819 | -0.6857 | <0.0001 |
| TNFRSF1B  | 0.905 | -0.6857 | <0.0001 |
| MIR324    | 0.811 | -0.6849 | <0.0001 |
| SULT2A1   | 0.852 | -0.6847 | <0.0001 |
| ZSWIM7    | 0.655 | -0.6845 | <0.0001 |
| IGHV3-30  | 0.719 | -0.6844 | 0.0023  |
| IL17RC    | 0.913 | -0.6842 | <0.0001 |
| FGD4      | 0.861 | -0.6835 | <0.0001 |
| C11orf24  | 0.859 | -0.6834 | <0.0001 |
| F12       | 0.865 | -0.6834 | <0.0001 |

|              |       |         |         |
|--------------|-------|---------|---------|
| RBMX2P1      | 0.425 | -0.6831 | <0.0001 |
| IGLJ3        | 0.919 | -0.6831 | <0.0001 |
| CFAP70       | 0.838 | -0.6829 | 0.0313  |
| FLJ46906     | 0.719 | -0.6824 | 0.0005  |
| LOC100128531 | 0.16  | -0.6823 | <0.0001 |
| CBLN3        | 0.826 | -0.6816 | <0.0001 |
| COQ9         | 0.809 | -0.6815 | <0.0001 |
| LINC00683    | 0.317 | -0.6813 | <0.0001 |
| TRGV9        | 0.412 | -0.6813 | <0.0001 |
| PLIN4        | 0.918 | -0.6812 | <0.0001 |
| PTPRS        | 0.859 | -0.6811 | <0.0001 |
| MTUS2        | 0.917 | -0.6811 | <0.0001 |
| MTMR9LP      | 0.839 | -0.681  | <0.0001 |
| GMFG         | 0.933 | -0.6808 | <0.0001 |
| AK3          | 0.771 | -0.6807 | <0.0001 |
| ARG1         | 0.868 | -0.6807 | <0.0001 |
| LPIN2        | 0.897 | -0.6807 | <0.0001 |
| GVINP1       | 0.46  | -0.6804 | <0.0001 |
| HPGD         | 0.798 | -0.6804 | <0.0001 |
| LOC653513    | 0.726 | -0.6802 | 0.0062  |
| IGKV1D-12    | 0.851 | -0.6802 | 0.0277  |
| ATF3         | 0.922 | -0.6801 | <0.0001 |
| ATG2A        | 0.858 | -0.68   | <0.0001 |
| PCSK6        | 0.895 | -0.6795 | <0.0001 |
| FUOM         | 0.562 | -0.6792 | <0.0001 |
| MYZAP        | 0.525 | -0.6787 | <0.0001 |
| FOXP2        | 0.807 | -0.6787 | <0.0001 |
| CYTB         | 0.747 | -0.6786 | 0.0109  |
| CD82         | 0.85  | -0.6783 | <0.0001 |
| TTR          | 0.875 | -0.6779 | <0.0001 |
| NTRK3        | 0.903 | -0.6772 | <0.0001 |
| IGK          | 0.893 | -0.677  | 0.0184  |
| FAM214A      | 0.801 | -0.6768 | <0.0001 |

|              |       |         |         |
|--------------|-------|---------|---------|
| KCNJ10       | 0.914 | -0.6759 | <0.0001 |
| BCKDHA       | 0.961 | -0.6759 | <0.0001 |
| BTF3P6       | 0.408 | -0.6758 | <0.0001 |
| TAGAP        | 0.808 | -0.6755 | <0.0001 |
| TRAM2        | 0.891 | -0.6755 | <0.0001 |
| CYP1A1       | 0.889 | -0.6752 | <0.0001 |
| VTCN1        | 0.798 | -0.675  | <0.0001 |
| SOWAHB       | 0.646 | -0.6748 | <0.0001 |
| UBXN8        | 0.652 | -0.6746 | <0.0001 |
| NR1H4        | 0.912 | -0.6746 | <0.0001 |
| C1S          | 0.905 | -0.6742 | <0.0001 |
| MICU1        | 0.827 | -0.674  | <0.0001 |
| NR4A2        | 0.885 | -0.6739 | <0.0001 |
| TLR3         | 0.792 | -0.6738 | <0.0001 |
| BLNK         | 0.919 | -0.6737 | <0.0001 |
| IGLV4-60     | 0.74  | -0.6734 | 0.0031  |
| SMAD7        | 0.899 | -0.6732 | <0.0001 |
| LOC147004    | 0.66  | -0.6728 | 0.0411  |
| LINC01166    | 0     | -0.6727 | <0.0001 |
| RPL35AP32    | 0     | -0.6716 | <0.0001 |
| NOL4         | 0.915 | -0.6716 | <0.0001 |
| PAPSS2       | 0.919 | -0.6716 | <0.0001 |
| SMIM14       | 0.735 | -0.6714 | <0.0001 |
| NBPF13P      | 0.366 | -0.6713 | <0.0001 |
| AMOTL2       | 0.916 | -0.6711 | <0.0001 |
| GABARAPL3    | 0.891 | -0.671  | <0.0001 |
| TMEM125      | 0.803 | -0.6709 | <0.0001 |
| SLAMF6       | 0.727 | -0.6707 | <0.0001 |
| FAM95B1      | 0.827 | -0.6703 | 0.0003  |
| LOC100505736 | 0     | -0.6701 | 0.036   |
| CCDC68       | 0.826 | -0.6701 | <0.0001 |
| LPAR1        | 0.819 | -0.67   | <0.0001 |
| AOX1         | 0.86  | -0.6699 | <0.0001 |

|            |       |         |         |
|------------|-------|---------|---------|
| FNIP2      | 0.741 | -0.6692 | <0.0001 |
| IGHV2-26   | 0.806 | -0.669  | 0.0097  |
| USP43      | 0.883 | -0.669  | <0.0001 |
| AFF1       | 0.919 | -0.6684 | <0.0001 |
| NKX3-1     | 0.894 | -0.6679 | <0.0001 |
| PRICKLE1   | 0.851 | -0.6676 | <0.0001 |
| GSTM5      | 0.903 | -0.6676 | <0.0001 |
| GIMAP7     | 0.895 | -0.6673 | <0.0001 |
| DLG2       | 0.908 | -0.6671 | <0.0001 |
| FGR        | 0.928 | -0.6671 | <0.0001 |
| FAM151A    | 0.689 | -0.6666 | <0.0001 |
| EVI2B      | 0.896 | -0.6664 | <0.0001 |
| EGR3       | 0.852 | -0.6663 | <0.0001 |
| PUS10      | 0.888 | -0.6663 | <0.0001 |
| HP         | 0.923 | -0.6661 | <0.0001 |
| DUSP16     | 0.818 | -0.6659 | <0.0001 |
| REEP6      | 0.549 | -0.6657 | <0.0001 |
| TECTA      | 0.883 | -0.6657 | <0.0001 |
| SC5D       | 0.785 | -0.6654 | <0.0001 |
| FCGR3B     | 0.812 | -0.6652 | <0.0001 |
| NKX2-2-AS1 | 0     | -0.6649 | 0.0001  |
| ANO1       | 0.659 | -0.6648 | <0.0001 |
| NPC1L1     | 0.829 | -0.6646 | <0.0001 |
| PAFAH2     | 0.849 | -0.6645 | <0.0001 |
| HLF        | 0.898 | -0.6642 | <0.0001 |
| PMPCA      | 0.934 | -0.6639 | <0.0001 |
| SORBS3     | 0.941 | -0.6639 | <0.0001 |
| ZNF160     | 0.895 | -0.6638 | <0.0001 |
| NCKAP5     | 0.627 | -0.6637 | <0.0001 |
| PLEKHA4    | 0.82  | -0.6634 | <0.0001 |
| MIR1343    | 0.376 | -0.6631 | 0.0001  |
| NMUR1      | 0.891 | -0.6631 | <0.0001 |
| CHST9      | 0.847 | -0.663  | <0.0001 |

|              |       |         |         |
|--------------|-------|---------|---------|
| RPS6P16      | 0.558 | -0.6627 | 0.0185  |
| ADI1         | 0.787 | -0.6626 | <0.0001 |
| LOC100506682 | 0     | -0.6625 | 0.0001  |
| TARP         | 0.84  | -0.6624 | <0.0001 |
| SLC24A4      | 0.796 | -0.662  | <0.0001 |
| RAPH1        | 0.851 | -0.662  | <0.0001 |
| ZNF831       | 0.682 | -0.6616 | <0.0001 |
| GPR162       | 0.908 | -0.6616 | <0.0001 |
| TSPYL1       | 0.832 | -0.6613 | <0.0001 |
| OSTF1        | 0.92  | -0.6613 | <0.0001 |
| SSC5D        | 0.807 | -0.661  | <0.0001 |
| EMC6         | 0.971 | -0.6607 | 0.0223  |
| MTND6P4      | 0.583 | -0.6606 | 0.0239  |
| TAF9BP1      | 0     | -0.6606 | <0.0001 |
| MRC2         | 0.887 | -0.6605 | <0.0001 |
| PLCG2        | 0.887 | -0.6605 | <0.0001 |
| SRGN         | 0.896 | -0.6602 | <0.0001 |
| RBKS         | 0.709 | -0.6592 | <0.0001 |
| IGLV4-69     | 0.745 | -0.6591 | 0.0039  |
| LOC100505588 | 0     | -0.6588 | 0.0002  |
| IGKV3D-20    | 0.823 | -0.6588 | 0.0029  |
| GOLGA8T      | 0.841 | -0.6588 | 0.0243  |
| MCCC1-AS1    | 0.834 | -0.6585 | 0.0204  |
| RFPL4AL1     | 0.559 | -0.6585 | <0.0001 |
| BSDC1        | 0.846 | -0.6585 | <0.0001 |
| SNED1        | 0.827 | -0.6584 | <0.0001 |
| G6PC         | 0.826 | -0.6582 | <0.0001 |
| FGG          | 0.9   | -0.6582 | <0.0001 |
| ACOX2        | 0.864 | -0.658  | <0.0001 |
| ARMCX3       | 0.759 | -0.6579 | <0.0001 |
| GLOD4        | 0.799 | -0.6579 | <0.0001 |
| CCL4L1       | 0.726 | -0.6578 | <0.0001 |
| ZNF30-AS1    | 0     | -0.6577 | <0.0001 |

|            |       |         |         |
|------------|-------|---------|---------|
| FGF23      | 0.825 | -0.6575 | <0.0001 |
| CPNE8      | 0.812 | -0.6573 | <0.0001 |
| SDR42E1    | 0.698 | -0.6571 | <0.0001 |
| SIGLEC17P  | 0.801 | -0.6571 | <0.0001 |
| PLEKHA2    | 0.849 | -0.6568 | <0.0001 |
| PHYH       | 0.916 | -0.6567 | <0.0001 |
| PDLIM2     | 0.881 | -0.6565 | <0.0001 |
| PTPRC      | 0.882 | -0.6565 | <0.0001 |
| ALDH5A1    | 0.911 | -0.6564 | <0.0001 |
| HS1BP3-IT1 | 0.574 | -0.6561 | 0.0002  |
| MIR3650    | 0     | -0.6559 | 0.0001  |
| LOC729451  | 0.716 | -0.6557 | 0.0027  |
| THEMIS2    | 0.824 | -0.6556 | <0.0001 |
| PRNP       | 0.915 | -0.6555 | <0.0001 |
| SCN7A      | 0.936 | -0.6555 | <0.0001 |
| REPS1      | 0.845 | -0.6553 | <0.0001 |
| ANO1-AS1   | 0     | -0.6551 | <0.0001 |
| SH2D1A     | 0.811 | -0.655  | <0.0001 |
| SEPSECS    | 0.812 | -0.6548 | <0.0001 |
| MUC3A      | 0.795 | -0.6542 | <0.0001 |
| ADIRF      | 0.43  | -0.6541 | <0.0001 |
| AOAH       | 0.928 | -0.654  | <0.0001 |
| VNN3       | 0.736 | -0.6539 | <0.0001 |
| MTHFD1P1   | 0     | -0.6537 | <0.0001 |
| UNC13D     | 0.891 | -0.6536 | <0.0001 |
| LINC00365  | 0.231 | -0.6533 | <0.0001 |
| SH2D1B     | 0.816 | -0.6532 | <0.0001 |
| DHRS4L1    | 0.164 | -0.6531 | <0.0001 |
| ST6GALNAC6 | 0.885 | -0.6529 | <0.0001 |
| SNX9       | 0.839 | -0.6528 | <0.0001 |
| PDCD1LG2   | 0.897 | -0.6528 | <0.0001 |
| GATA6      | 0.888 | -0.6526 | <0.0001 |
| RNA5SP433  | 0.624 | -0.6524 | 0.009   |

|           |       |         |         |
|-----------|-------|---------|---------|
| ZMYND12   | 0.735 | -0.6524 | <0.0001 |
| SMCO3     | 0.886 | -0.6519 | <0.0001 |
| IGLV5-45  | 0.601 | -0.6513 | 0.0018  |
| ADHFE1    | 0.881 | -0.6512 | <0.0001 |
| NXN       | 0.79  | -0.6511 | <0.0001 |
| SIGLEC10  | 0.72  | -0.651  | <0.0001 |
| DBT       | 0.93  | -0.6509 | <0.0001 |
| DHTKD1    | 0.825 | -0.6508 | <0.0001 |
| KCNMA1    | 0.895 | -0.6508 | <0.0001 |
| SULT1B1   | 0.868 | -0.6505 | <0.0001 |
| IRF2BPL   | 0.791 | -0.6504 | <0.0001 |
| ABHD2     | 0.908 | -0.6497 | <0.0001 |
| MME       | 0.917 | -0.6495 | <0.0001 |
| LINC00924 | 0.405 | -0.6488 | <0.0001 |
| GABRB3    | 0.897 | -0.6484 | <0.0001 |
| NPW       | 0.781 | -0.648  | <0.0001 |
| IGFBP6    | 0.895 | -0.6476 | <0.0001 |
| AJAP1     | 0.872 | -0.6472 | <0.0001 |
| ADGRG6    | 0.718 | -0.6469 | 0.0321  |
| DACT1     | 0.799 | -0.6469 | <0.0001 |
| NAP1L5    | 0.799 | -0.6468 | <0.0001 |
| GLTPD2    | 0.821 | -0.6467 | <0.0001 |
| SCIMP     | 0.866 | -0.6465 | <0.0001 |
| CTPS1     | 0.443 | -0.6463 | <0.0001 |
| GIMAP6    | 0.918 | -0.646  | <0.0001 |
| MIR3156-2 | 0.442 | -0.6459 | 0.0002  |
| GMNC      | 0.896 | -0.6458 | 0.0002  |
| TMEM200C  | 0.773 | -0.6458 | <0.0001 |
| MYO1B     | 0.912 | -0.6458 | <0.0001 |
| CIPC      | 0.919 | -0.6456 | 0.0047  |
| FLT3      | 0.905 | -0.6453 | <0.0001 |
| ABCA10    | 0.825 | -0.6451 | <0.0001 |
| COX18     | 0.888 | -0.6451 | <0.0001 |

|              |       |         |         |
|--------------|-------|---------|---------|
| LOC100130587 | 0.636 | -0.6449 | 0.0457  |
| RETSAT       | 0.846 | -0.6449 | <0.0001 |
| PIK3R1       | 0.901 | -0.6449 | <0.0001 |
| WDR17        | 0.909 | -0.6449 | <0.0001 |
| MPEG1        | 0.934 | -0.6447 | <0.0001 |
| GDA          | 0.83  | -0.6446 | <0.0001 |
| AGBL4        | 0.897 | -0.6446 | <0.0001 |
| ST6GALNAC3   | 0.842 | -0.6444 | <0.0001 |
| SIK1         | 0.85  | -0.6442 | <0.0001 |
| ACVR1C       | 0.851 | -0.6437 | <0.0001 |
| IGKV5-2      | 0.685 | -0.6434 | 0.0001  |
| ACYP2        | 0.898 | -0.6432 | <0.0001 |
| SPSB4        | 0.926 | -0.6432 | <0.0001 |
| SDHB         | 0.861 | -0.643  | <0.0001 |
| SYDE2        | 0.896 | -0.643  | <0.0001 |
| SLC1A2       | 0.922 | -0.6429 | <0.0001 |
| LOC440346    | 0.715 | -0.6428 | 0.0396  |
| MIR6753      | 0     | -0.6428 | <0.0001 |
| PCTP         | 0.812 | -0.6427 | <0.0001 |
| ACKR4        | 0.885 | -0.6425 | <0.0001 |
| FGA          | 0.909 | -0.6422 | <0.0001 |
| ZFP3         | 0.806 | -0.6418 | <0.0001 |
| HMGB1P27     | 0     | -0.6417 | <0.0001 |
| ID4          | 0.946 | -0.6417 | <0.0001 |
| HRG          | 0.856 | -0.6416 | <0.0001 |
| MIR3689D1    | 0     | -0.6412 | 0.0002  |
| GSTA2        | 0.71  | -0.6412 | <0.0001 |
| MIR497HG     | 0.77  | -0.6411 | 0.0013  |
| AKNA         | 0.863 | -0.641  | <0.0001 |
| CCL5         | 0.913 | -0.641  | <0.0001 |
| INTS6        | 0.82  | -0.6409 | <0.0001 |
| SRSF5        | 0.933 | -0.6405 | 0.0001  |
| FLRT2        | 0.888 | -0.6405 | <0.0001 |



|              |       |         |         |
|--------------|-------|---------|---------|
| CCT6B        | 0.913 | -0.6405 | <0.0001 |
| LAP3         | 0.758 | -0.6403 | <0.0001 |
| MIR3679      | 0     | -0.6402 | 0.0002  |
| AQP7P1       | 0.873 | -0.6402 | <0.0001 |
| NR1I3        | 0.898 | -0.6401 | <0.0001 |
| IGHV3-64     | 0.863 | -0.64   | 0.0176  |
| CNKSR3       | 0.794 | -0.6396 | <0.0001 |
| NRXN1        | 0.872 | -0.6394 | <0.0001 |
| NRG3         | 0.859 | -0.6393 | <0.0001 |
| SNORD115-8   | 0.856 | -0.6389 | 0.0178  |
| EPAS1        | 0.928 | -0.6386 | <0.0001 |
| FAM210B      | 0.803 | -0.6384 | <0.0001 |
| AOC3         | 0.885 | -0.6383 | <0.0001 |
| AIG1         | 0.783 | -0.6381 | <0.0001 |
| LOC100505570 | 0.626 | -0.6367 | 0.0024  |
| IGLC3        | 0.375 | -0.6367 | <0.0001 |
| TPD52L1      | 0.924 | -0.6365 | <0.0001 |
| DHRS4        | 0.816 | -0.6363 | <0.0001 |
| NDUFA9P1     | 0.267 | -0.6361 | <0.0001 |
| IGFBP1       | 0.817 | -0.6361 | <0.0001 |
| CD247        | 0.906 | -0.6361 | <0.0001 |
| LOC100131315 | 0     | -0.636  | 0.0001  |
| CROCC2       | 0.535 | -0.636  | 0.0074  |
| PSAT1        | 0.885 | -0.636  | <0.0001 |
| DTHD1        | 0.778 | -0.6357 | <0.0001 |
| CCDC28A      | 0.836 | -0.6355 | <0.0001 |
| PGA5         | 0.946 | -0.6348 | 0.0048  |
| MIP          | 0.912 | -0.6345 | <0.0001 |
| HAGH         | 0.915 | -0.6345 | <0.0001 |
| GRK5         | 0.877 | -0.6342 | <0.0001 |
| TRG-AS1      | 0.908 | -0.6341 | 0.0199  |
| HEXIM1       | 0.868 | -0.6341 | <0.0001 |
| ADGRE1       | 0.511 | -0.634  | 0.0061  |

|              |       |         |         |
|--------------|-------|---------|---------|
| PRSS22       | 0.874 | -0.6338 | <0.0001 |
| MIR3158-1    | 0     | -0.6335 | 0.0002  |
| TSPAN11      | 0.877 | -0.6335 | <0.0001 |
| LOC401463    | 0.965 | -0.6333 | 0.0322  |
| SPON1        | 0.875 | -0.6333 | <0.0001 |
| ABCB4        | 0.908 | -0.6331 | <0.0001 |
| IGKV1D-8     | 0.918 | -0.633  | 0.0082  |
| ATOH7        | 0.855 | -0.6328 | <0.0001 |
| SUOX         | 0.913 | -0.6327 | <0.0001 |
| NR2F2-AS1    | 0     | -0.6324 | <0.0001 |
| LOC100507071 | 0.411 | -0.6322 | 0.0003  |
| DKFZp451B082 | 0.726 | -0.6322 | 0.0071  |
| KLF9         | 0.906 | -0.6321 | <0.0001 |
| CCL4         | 0.901 | -0.6319 | <0.0001 |
| SLC51A       | 0.84  | -0.6315 | <0.0001 |
| CDO1         | 0.859 | -0.6313 | <0.0001 |
| HHATL-AS1    | 0.82  | -0.6312 | 0.0233  |
| CLSTN2       | 0.889 | -0.6312 | <0.0001 |
| KRT16P2      | 0.773 | -0.6308 | 0.0002  |
| MGLL         | 0.905 | -0.6308 | <0.0001 |
| TBXAS1       | 0.909 | -0.6305 | <0.0001 |
| CYTIP        | 0.835 | -0.6304 | <0.0001 |
| CD8A         | 0.88  | -0.6302 | <0.0001 |
| PRF1         | 0.883 | -0.6301 | <0.0001 |
| ARHGAP8      | 0.917 | -0.6301 | <0.0001 |
| LNX2         | 0.805 | -0.6295 | <0.0001 |
| PPL          | 0.899 | -0.6294 | <0.0001 |
| NAMPT        | 0.846 | -0.629  | <0.0001 |
| ZFP36L1      | 0.944 | -0.6288 | <0.0001 |
| TIAF1        | 0.965 | -0.6286 | 0.0058  |
| TMEM53       | 0.837 | -0.6286 | <0.0001 |
| DNMT3L       | 0.886 | -0.6286 | <0.0001 |
| NUP58        | 0.606 | -0.6278 | 0.0072  |

|              |       |         |         |
|--------------|-------|---------|---------|
| CD200R1      | 0.816 | -0.6276 | <0.0001 |
| FAM74A6      | 0.789 | -0.6275 | 0.0288  |
| GLUD1        | 0.914 | -0.6275 | <0.0001 |
| NLRC3        | 0.735 | -0.6271 | <0.0001 |
| TPMT         | 0.896 | -0.627  | <0.0001 |
| PPP1R1C      | 0.642 | -0.6268 | <0.0001 |
| CLPX         | 0.886 | -0.6267 | <0.0001 |
| SLC17A3      | 0.902 | -0.6267 | <0.0001 |
| TTC38        | 0.872 | -0.6266 | <0.0001 |
| SFXN1        | 0.767 | -0.6264 | <0.0001 |
| CSF1R        | 0.941 | -0.6263 | <0.0001 |
| IGHV1-58     | 0.786 | -0.6262 | 0.0104  |
| UMODL1-AS1   | 0     | -0.6262 | <0.0001 |
| KLF4         | 0.899 | -0.6262 | <0.0001 |
| SELE         | 0.915 | -0.6261 | <0.0001 |
| PRICKLE2     | 0.786 | -0.6259 | <0.0001 |
| TRAT1        | 0.853 | -0.6258 | <0.0001 |
| HMGCS2       | 0.868 | -0.6258 | <0.0001 |
| DAO          | 0.902 | -0.6258 | <0.0001 |
| LOC100506990 | 0.683 | -0.6257 | <0.0001 |
| HPR          | 0.816 | -0.6257 | <0.0001 |
| CFL2         | 0.662 | -0.6256 | <0.0001 |
| BANF1P1      | 0.305 | -0.6255 | <0.0001 |
| SYTL2        | 0.732 | -0.6255 | <0.0001 |
| COL6A4P2     | 0.667 | -0.6253 | 0.0005  |
| CCS          | 0.908 | -0.625  | <0.0001 |
| LINC01078    | 0.47  | -0.6249 | 0.0273  |
| NUDT6        | 0.877 | -0.6248 | <0.0001 |
| SAMSN1       | 0.857 | -0.6243 | <0.0001 |
| NTRK2        | 0.873 | -0.6242 | <0.0001 |
| ARHGAP25     | 0.905 | -0.6241 | <0.0001 |
| PTK2B        | 0.917 | -0.6241 | <0.0001 |
| GSTA7P       | 0.744 | -0.6239 | 0.007   |

|              |       |         |         |
|--------------|-------|---------|---------|
| PROC         | 0.9   | -0.6239 | <0.0001 |
| ZCCHC23      | 0.832 | -0.6237 | 0.0223  |
| HABP2        | 0.859 | -0.6234 | <0.0001 |
| IGLV8-61     | 0.788 | -0.6232 | 0.0008  |
| MTHFS        | 0.947 | -0.6227 | <0.0001 |
| ACSM2A       | 0.819 | -0.6223 | <0.0001 |
| NEAT1        | 0.87  | -0.6222 | 0.0178  |
| ANKRD18DP    | 0.386 | -0.6221 | <0.0001 |
| SLC45A3      | 0.893 | -0.622  | <0.0001 |
| ADGRG3       | 0.473 | -0.6215 | <0.0001 |
| BDH1         | 0.884 | -0.6214 | <0.0001 |
| ZNF667-AS1   | 0.901 | -0.6213 | 0.002   |
| LOC100131107 | 0     | -0.6212 | <0.0001 |
| NFIA         | 0.618 | -0.6212 | <0.0001 |
| TXNDC11      | 0.741 | -0.6208 | <0.0001 |
| GRASP        | 0.91  | -0.6208 | <0.0001 |
| TNN          | 0.839 | -0.6204 | <0.0001 |
| IGLV6-57     | 0.735 | -0.6203 | <0.0001 |
| MRPL54       | 0.886 | -0.6202 | <0.0001 |
| RELN         | 0.877 | -0.6201 | <0.0001 |
| OR5G5P       | 0.815 | -0.62   | 0.0031  |
| TMEM192      | 0.832 | -0.6198 | <0.0001 |
| AVPR1A       | 0.878 | -0.6197 | <0.0001 |
| GRPEL1       | 0.739 | -0.6196 | <0.0001 |
| KLF8         | 0.88  | -0.6196 | <0.0001 |
| BNIP2        | 0.917 | -0.6196 | <0.0001 |
| PRDX3P2      | 0     | -0.6195 | <0.0001 |
| KMT5B        | 0.043 | -0.6194 | <0.0001 |
| VPS37B       | 0.839 | -0.6193 | <0.0001 |
| BHLHE22      | 0.864 | -0.6191 | <0.0001 |
| AQP7P2       | 0.736 | -0.619  | <0.0001 |
| MIR548I3     | 0     | -0.6188 | 0.0003  |
| MIR100HG     | 0     | -0.6187 | <0.0001 |

|              |       |         |         |
|--------------|-------|---------|---------|
| RNF144B      | 0.773 | -0.6183 | <0.0001 |
| IL16         | 0.919 | -0.6182 | <0.0001 |
| WNT2         | 0.925 | -0.6181 | <0.0001 |
| SEC14L2      | 0.896 | -0.618  | <0.0001 |
| IL1R1        | 0.915 | -0.618  | <0.0001 |
| WWC2         | 0.798 | -0.6178 | <0.0001 |
| REC8         | 0.889 | -0.6177 | <0.0001 |
| API5P2       | 0.141 | -0.6173 | <0.0001 |
| HSBP1L1      | 0.789 | -0.6172 | <0.0001 |
| LOC91450     | 0.521 | -0.6167 | 0.0005  |
| TNRC6C-AS1   | 0.285 | -0.6166 | <0.0001 |
| RLIMP1       | 0     | -0.6164 | <0.0001 |
| SIRT5        | 0.866 | -0.6164 | <0.0001 |
| APOC1P1      | 0.829 | -0.6163 | 0.001   |
| CCDC38       | 0.764 | -0.6163 | <0.0001 |
| TUSC1        | 0.777 | -0.6161 | <0.0001 |
| MIR4265      | 0     | -0.616  | 0.0003  |
| LOC100129175 | 0     | -0.6159 | <0.0001 |
| ABHD14B      | 0.879 | -0.6158 | <0.0001 |
| PADI4        | 0.908 | -0.6156 | <0.0001 |
| CYP2A7P1     | 0.938 | -0.6156 | <0.0001 |
| LOC100287944 | 0.304 | -0.6153 | <0.0001 |
| TFR2         | 0.663 | -0.6143 | <0.0001 |
| IZUMO4       | 0.807 | -0.6142 | <0.0001 |
| MACROD1      | 0.876 | -0.6141 | <0.0001 |
| WDFY3-AS2    | 0.734 | -0.614  | <0.0001 |
| CLEC7A       | 0.87  | -0.614  | <0.0001 |
| FABP1        | 0.907 | -0.6138 | <0.0001 |
| IGSF10       | 0.883 | -0.6129 | <0.0001 |
| LINC00472    | 0.812 | -0.6128 | <0.0001 |
| SLC17A8      | 0.847 | -0.6127 | <0.0001 |
| COX7A1       | 0.915 | -0.6126 | <0.0001 |
| CLUHP3       | 0.912 | -0.6125 | 0.001   |

|              |       |         |         |
|--------------|-------|---------|---------|
| RAB26        | 0.822 | -0.6123 | <0.0001 |
| ITIH1        | 0.899 | -0.6119 | <0.0001 |
| DSCAM        | 0.837 | -0.6113 | <0.0001 |
| IGHD         | 0.539 | -0.6111 | <0.0001 |
| PNRC1        | 0.894 | -0.6111 | <0.0001 |
| GLT1D1       | 0.825 | -0.6109 | <0.0001 |
| LDLR         | 0.916 | -0.6107 | <0.0001 |
| PPP1R1A      | 0.825 | -0.6102 | <0.0001 |
| PABPN1L      | 0.808 | -0.6101 | <0.0001 |
| STRCP1       | 0     | -0.6098 | <0.0001 |
| GNG2         | 0.904 | -0.6097 | <0.0001 |
| LHPP         | 0.873 | -0.6096 | <0.0001 |
| ADORA3       | 0.939 | -0.6096 | <0.0001 |
| PLXNA4       | 0.778 | -0.6095 | <0.0001 |
| ETS1         | 0.917 | -0.6093 | <0.0001 |
| SLC14A1      | 0.934 | -0.6093 | <0.0001 |
| FCRL5        | 0.679 | -0.6091 | <0.0001 |
| SNHG15       | 0     | -0.6089 | <0.0001 |
| LATS2        | 0.882 | -0.6089 | <0.0001 |
| PLD1         | 0.903 | -0.6089 | <0.0001 |
| CSF3R        | 0.933 | -0.6087 | <0.0001 |
| PPP2CB       | 0.903 | -0.6086 | <0.0001 |
| LAMTOR3P2    | 0.391 | -0.6083 | <0.0001 |
| PECR         | 0.824 | -0.6082 | <0.0001 |
| TRGV5P       | 0.562 | -0.608  | 0.0224  |
| ITSN1        | 0.933 | -0.608  | <0.0001 |
| RHOA-IT1     | 0.661 | -0.6078 | 0.0039  |
| DNAH2        | 0.891 | -0.6078 | <0.0001 |
| PRG2         | 0.929 | -0.6074 | <0.0001 |
| RNGTTP1      | 0     | -0.6073 | <0.0001 |
| KIAA1671     | 0.743 | -0.6073 | <0.0001 |
| RILP         | 0.796 | -0.6073 | <0.0001 |
| LOC100507600 | 0.352 | -0.6072 | <0.0001 |

|              |       |         |         |
|--------------|-------|---------|---------|
| SGMS2        | 0.859 | -0.607  | <0.0001 |
| TNFRSF11B    | 0.878 | -0.607  | <0.0001 |
| LAG3         | 0.854 | -0.6066 | <0.0001 |
| KCNAB1       | 0.927 | -0.6066 | <0.0001 |
| SCGB2B3P     | 0     | -0.6065 | 0.0003  |
| LINC01422    | 0     | -0.6065 | <0.0001 |
| MIR1185-1    | 0.468 | -0.6063 | <0.0001 |
| ALOX15P1     | 0.18  | -0.6061 | 0.0004  |
| CXCR1        | 0.922 | -0.6061 | <0.0001 |
| C1QC         | 0.929 | -0.6059 | <0.0001 |
| SEC31B       | 0.912 | -0.6058 | <0.0001 |
| UPB1         | 0.639 | -0.6055 | <0.0001 |
| LRRC19       | 0.8   | -0.6052 | <0.0001 |
| LINC01197    | 0.912 | -0.6049 | 0.0181  |
| LILRP1       | 0.326 | -0.6047 | <0.0001 |
| SNORD126     | 0.884 | -0.6046 | 0.0183  |
| MIR432       | 0     | -0.6045 | 0.0004  |
| RFPL1        | 0.911 | -0.6044 | <0.0001 |
| LINC01473    | 0     | -0.6043 | <0.0001 |
| MIR4696      | 0     | -0.604  | 0.0004  |
| FAM41AY1     | 0     | -0.6039 | <0.0001 |
| SLA          | 0.888 | -0.6038 | <0.0001 |
| RAI2         | 0.83  | -0.6031 | <0.0001 |
| CYP4X1       | 0.727 | -0.6029 | <0.0001 |
| TRAPPC12-AS1 | 0.707 | -0.6028 | 0.0034  |
| RNU6-1039P   | 0.693 | -0.6028 | 0.0052  |
| CNKSR1       | 0.894 | -0.6027 | <0.0001 |
| PRSS51       | 0.66  | -0.6026 | 0.0119  |
| HGD          | 0.9   | -0.6023 | <0.0001 |
| HPN          | 0.897 | -0.6022 | <0.0001 |
| GBP1         | 0.901 | -0.6021 | <0.0001 |
| IGKV1-13     | 0.186 | -0.6016 | <0.0001 |
| SMPD1        | 0.908 | -0.6016 | <0.0001 |

|            |       |         |         |
|------------|-------|---------|---------|
| LINC01140  | 0.941 | -0.6014 | 0.0103  |
| SLC28A3    | 0.854 | -0.6014 | <0.0001 |
| SGCD       | 0.867 | -0.6014 | <0.0001 |
| ABI3       | 0.926 | -0.6012 | <0.0001 |
| SAA1       | 0.746 | -0.6008 | <0.0001 |
| USP53      | 0.85  | -0.6008 | <0.0001 |
| SFXN5      | 0.887 | -0.6008 | <0.0001 |
| IGHEP2     | 0.008 | -0.6005 | <0.0001 |
| ABCG2      | 0.878 | -0.6004 | <0.0001 |
| IGHV2-70   | 0.787 | -0.6001 | 0.0234  |
| AQP9       | 0.907 | -0.6    | <0.0001 |
| PPIEL      | 0.783 | -0.5997 | <0.0001 |
| MIR1267    | 0.81  | -0.5996 | 0.0035  |
| RGPD2      | 0.948 | -0.5996 | 0.0101  |
| RNA5SP349  | 0.109 | -0.5996 | <0.0001 |
| NALCN      | 0.881 | -0.5996 | <0.0001 |
| TGFA       | 0.853 | -0.5995 | <0.0001 |
| COL14A1    | 0.924 | -0.599  | <0.0001 |
| IKZF1      | 0.832 | -0.5989 | <0.0001 |
| LIMCH1     | 0.766 | -0.5986 | <0.0001 |
| SLC8A1     | 0.914 | -0.5986 | <0.0001 |
| HAPLN4     | 0.933 | -0.5986 | <0.0001 |
| POLHP1     | 0.29  | -0.5984 | <0.0001 |
| PRCP       | 0.922 | -0.5978 | <0.0001 |
| WNT11      | 0.885 | -0.5976 | <0.0001 |
| HELQ       | 0.879 | -0.5973 | <0.0001 |
| MEGF10     | 0.764 | -0.5969 | <0.0001 |
| GFRA2      | 0.92  | -0.5969 | <0.0001 |
| ANKRD20A5P | 0.576 | -0.5966 | <0.0001 |
| MZB1       | 0.794 | -0.5966 | <0.0001 |
| CTTNBP2    | 0.832 | -0.5963 | <0.0001 |
| MRPL32     | 0.879 | -0.5962 | <0.0001 |
| NFATC1     | 0.896 | -0.5962 | <0.0001 |



|            |       |         |         |
|------------|-------|---------|---------|
| ACY1       | 0.967 | -0.5958 | 0.0002  |
| RNA5SP415  | 0.694 | -0.5957 | 0.0328  |
| PC         | 0.908 | -0.5955 | <0.0001 |
| RPL17P11   | 0     | -0.5954 | <0.0001 |
| RNA5SP413  | 0.635 | -0.595  | 0.0186  |
| MYO9A      | 0.811 | -0.595  | <0.0001 |
| NR0B2      | 0.884 | -0.595  | <0.0001 |
| ANKRD24    | 0.925 | -0.595  | <0.0001 |
| KANK4      | 0.721 | -0.5949 | <0.0001 |
| LOC283856  | 0.798 | -0.5948 | 0.0131  |
| SERPINA3   | 0.96  | -0.5947 | 0.0002  |
| COBLL1     | 0.891 | -0.5944 | <0.0001 |
| IGLL5      | 0.754 | -0.5937 | <0.0001 |
| GJC3       | 0.87  | -0.5937 | <0.0001 |
| HM13-IT1   | 0.283 | -0.5936 | <0.0001 |
| TRABD2B    | 0.828 | -0.5934 | 0.0001  |
| SNORD115-4 | 0.89  | -0.5934 | 0.0477  |
| USPL1      | 0.905 | -0.5934 | <0.0001 |
| SNORD65    | 0.34  | -0.5933 | <0.0001 |
| SCGB3A1    | 0.774 | -0.5931 | <0.0001 |
| NEIL1      | 0.856 | -0.5929 | <0.0001 |
| SLC9A3R2   | 0.908 | -0.5929 | <0.0001 |
| ARHGAP20   | 0.824 | -0.5926 | <0.0001 |
| ORM2       | 0.929 | -0.5924 | 0.0001  |
| DPEP2      | 0.888 | -0.5919 | <0.0001 |
| PIK3CD     | 0.884 | -0.5918 | <0.0001 |
| NKD2       | 0.728 | -0.5917 | <0.0001 |
| CELF2      | 0.795 | -0.5914 | <0.0001 |
| ABHD15     | 0.667 | -0.5911 | <0.0001 |
| GPRASP1    | 0.954 | -0.5906 | <0.0001 |
| C1QA       | 0.921 | -0.5905 | <0.0001 |
| KLHDC1     | 0.88  | -0.5904 | <0.0001 |
| FNDC3A     | 0.93  | -0.5903 | <0.0001 |

|             |       |         |         |
|-------------|-------|---------|---------|
| CUX2        | 0.711 | -0.5901 | <0.0001 |
| RANBP10     | 0.921 | -0.5901 | <0.0001 |
| SNORD91A    | 0.354 | -0.59   | <0.0001 |
| C11orf21    | 0.788 | -0.59   | <0.0001 |
| CNTFR       | 0.866 | -0.59   | <0.0001 |
| ESRRG       | 0.899 | -0.5897 | <0.0001 |
| GOLGA8M     | 0.911 | -0.5896 | 0.0287  |
| UGT1A4      | 0.873 | -0.5893 | 0.0003  |
| ERG         | 0.911 | -0.5893 | <0.0001 |
| DOK2        | 0.835 | -0.5889 | <0.0001 |
| NLRP3       | 0.829 | -0.5888 | <0.0001 |
| OTC         | 0.914 | -0.5886 | <0.0001 |
| SORBS2      | 0.914 | -0.5883 | <0.0001 |
| SNORD103B   | 0.374 | -0.5881 | <0.0001 |
| CDK9        | 0.926 | -0.5881 | <0.0001 |
| XAF1        | 0.934 | -0.588  | <0.0001 |
| DUSP10      | 0.765 | -0.5875 | <0.0001 |
| PPP1R32     | 0.787 | -0.5871 | <0.0001 |
| GLT8D2      | 0.81  | -0.5868 | <0.0001 |
| TRGV2       | 0     | -0.5866 | <0.0001 |
| CTSB        | 0.854 | -0.5866 | <0.0001 |
| NKIRAS1     | 0.851 | -0.5865 | <0.0001 |
| KLRC4-KLRK1 | 0.279 | -0.5864 | <0.0001 |
| C2orf88     | 0.808 | -0.5864 | <0.0001 |
| SELL        | 0.88  | -0.586  | <0.0001 |
| DSCAML1     | 0.819 | -0.5859 | <0.0001 |
| CMYA5       | 0.865 | -0.5858 | <0.0001 |
| C8orf31     | 0.873 | -0.5857 | <0.0001 |
| CHRM2       | 0.94  | -0.5856 | <0.0001 |
| ENPP1       | 0.905 | -0.5855 | <0.0001 |
| LINC00310   | 0.903 | -0.5852 | 0.0011  |
| TRGV4       | 0.423 | -0.5851 | <0.0001 |
| RNA5SP324   | 0.864 | -0.585  | 0.0253  |

|              |       |         |         |
|--------------|-------|---------|---------|
| SERINC1      | 0.818 | -0.585  | <0.0001 |
| NKG7         | 0.793 | -0.5848 | <0.0001 |
| AUTS2        | 0.878 | -0.5848 | <0.0001 |
| AGAP1-IT1    | 0.754 | -0.5847 | 0.0129  |
| FNDC5        | 0.807 | -0.5846 | <0.0001 |
| GLDC         | 0.88  | -0.5845 | <0.0001 |
| LOC100507346 | 0     | -0.5844 | 0.0002  |
| CYP2U1       | 0.739 | -0.5843 | <0.0001 |
| KLC4         | 0.886 | -0.5842 | <0.0001 |
| POU6F1       | 0.936 | -0.5842 | <0.0001 |
| SEC14L4      | 0.835 | -0.584  | <0.0001 |
| IGHV4-31     | 0.875 | -0.5838 | 0.0165  |
| PALM2-AKAP2  | 0.942 | -0.5837 | 0.0057  |
| RUNX3        | 0.909 | -0.5837 | <0.0001 |
| LMLN-AS1     | 0.796 | -0.5834 | 0.0227  |
| RUND3B       | 0.772 | -0.5828 | <0.0001 |
| ARHGAP30     | 0.837 | -0.5828 | <0.0001 |
| CDH1         | 0.905 | -0.5825 | <0.0001 |
| PCNX4        | 0     | -0.5821 | <0.0001 |
| LGSN         | 0.77  | -0.582  | <0.0001 |
| RAB14        | 0.851 | -0.5814 | <0.0001 |
| KHK          | 0.866 | -0.5811 | <0.0001 |
| LOC100130548 | 0.828 | -0.5808 | 0.0436  |
| APBA1        | 0.863 | -0.5806 | <0.0001 |
| DPYS         | 0.877 | -0.5806 | <0.0001 |
| IGKV3D-7     | 0.568 | -0.5805 | 0.0017  |
| ABRA1        | 0.505 | -0.5805 | <0.0001 |
| GFOD1        | 0.869 | -0.5804 | <0.0001 |
| SDHD         | 0.893 | -0.5804 | <0.0001 |
| CMTR2        | 0.937 | -0.5801 | 0.0216  |
| GLRX         | 0.847 | -0.5801 | <0.0001 |
| SLED1        | 0.871 | -0.58   | 0.0011  |
| CISH         | 0.743 | -0.5798 | <0.0001 |

|           |       |         |         |
|-----------|-------|---------|---------|
| EVA1C     | 0.898 | -0.5794 | 0.0008  |
| GATA3     | 0.884 | -0.5791 | <0.0001 |
| TK2       | 0.918 | -0.579  | <0.0001 |
| APOC3     | 0.438 | -0.5789 | <0.0001 |
| DUSP2     | 0.918 | -0.5789 | <0.0001 |
| GPBAR1    | 0.86  | -0.5788 | <0.0001 |
| MAMDC4    | 0.832 | -0.5787 | <0.0001 |
| FTCD-AS1  | 0.201 | -0.5786 | <0.0001 |
| PIM3      | 0.854 | -0.5786 | <0.0001 |
| SLC25A34  | 0.851 | -0.5783 | <0.0001 |
| PDE8A     | 0.888 | -0.578  | <0.0001 |
| SUCNR1    | 0.772 | -0.5779 | <0.0001 |
| RUFY3     | 0.879 | -0.5779 | <0.0001 |
| DCDC2C    | 0.617 | -0.5778 | 0.0003  |
| LINC01505 | 0.09  | -0.577  | <0.0001 |
| MRM3      | 0.677 | -0.5769 | 0.0316  |
| FGFR1     | 0.875 | -0.5766 | <0.0001 |
| ACOT2     | 0.901 | -0.5763 | <0.0001 |
| UBAP1L    | 0.546 | -0.576  | <0.0001 |
| CPB2      | 0.877 | -0.576  | <0.0001 |
| DPYD      | 0.821 | -0.5758 | <0.0001 |
| MIR6821   | 0     | -0.5756 | <0.0001 |
| CLK1      | 0.832 | -0.5754 | <0.0001 |
| PQLC1     | 0.784 | -0.5753 | <0.0001 |
| DOCK10    | 0.835 | -0.5752 | <0.0001 |
| TRPV3     | 0.872 | -0.575  | <0.0001 |
| CST9LP1   | 0     | -0.5747 | 0.0004  |
| REPS2     | 0.889 | -0.5743 | <0.0001 |
| SIK3      | 0.829 | -0.5735 | <0.0001 |
| TPT1      | 0.917 | -0.5733 | <0.0001 |
| TAL1      | 0.911 | -0.5731 | <0.0001 |
| DUXAP3    | 0.908 | -0.5728 | 0.0249  |
| JUN       | 0.924 | -0.5727 | <0.0001 |

|              |       |         |         |
|--------------|-------|---------|---------|
| LZTFL1       | 0.749 | -0.5726 | <0.0001 |
| RNF130       | 0.834 | -0.5725 | <0.0001 |
| RNF122       | 0.869 | -0.5724 | <0.0001 |
| CA13         | 0.872 | -0.5722 | <0.0001 |
| ZBED1P1      | 0.384 | -0.5721 | <0.0001 |
| DACT3        | 0.779 | -0.5721 | <0.0001 |
| FMO3         | 0.895 | -0.5719 | <0.0001 |
| CCDC186      | 0.933 | -0.5717 | 0.0091  |
| ADGRE2       | 0     | -0.5717 | <0.0001 |
| FZD1         | 0.846 | -0.5717 | <0.0001 |
| NPR3         | 0.84  | -0.5715 | <0.0001 |
| SGPP1        | 0.889 | -0.5715 | <0.0001 |
| MIR1247      | 0.841 | -0.5714 | 0.0033  |
| LOC101926960 | 0     | -0.5714 | <0.0001 |
| NGF          | 0.823 | -0.5714 | <0.0001 |
| INPP1        | 0.903 | -0.5713 | <0.0001 |
| SNHG18       | 0.94  | -0.5707 | 0.0486  |
| CYB5A        | 0.841 | -0.5707 | <0.0001 |
| SCML4        | 0.815 | -0.5706 | <0.0001 |
| APCS         | 0.871 | -0.5705 | <0.0001 |
| ARRB1        | 0.9   | -0.5704 | <0.0001 |
| IGHV4-39     | 0.738 | -0.5703 | 0.0133  |
| LILRB3       | 0.9   | -0.5702 | <0.0001 |
| ARHGEF26-AS1 | 0.713 | -0.5697 | <0.0001 |
| CCPG1        | 0.907 | -0.5696 | <0.0001 |
| DDB2         | 0.911 | -0.5691 | <0.0001 |
| TTLL10-AS1   | 0.767 | -0.569  | 0.0105  |
| SNORD94      | 0.878 | -0.5688 | 0.0014  |
| TMEM173      | 0.721 | -0.5688 | <0.0001 |
| MIR4713      | 0.489 | -0.5687 | 0.0008  |
| TBX20        | 0.873 | -0.5684 | <0.0001 |
| LILRA3       | 0.886 | -0.5681 | <0.0001 |
| PDE1A        | 0.845 | -0.5678 | <0.0001 |

|              |       |         |         |
|--------------|-------|---------|---------|
| LINC02054    | 0     | -0.5676 | <0.0001 |
| SLITRK3      | 0.863 | -0.5674 | <0.0001 |
| CD207        | 0.901 | -0.5668 | <0.0001 |
| MAP1LC3A     | 0.731 | -0.5665 | <0.0001 |
| LOC100506585 | 0.745 | -0.5663 | 0.0293  |
| LCN12        | 0.766 | -0.5658 | <0.0001 |
| RAB27A       | 0.917 | -0.5657 | <0.0001 |
| EHBP1        | 0.826 | -0.5656 | <0.0001 |
| SAMD12       | 0.802 | -0.5655 | <0.0001 |
| HDC          | 0.882 | -0.5654 | <0.0001 |
| KDM7A        | 0.914 | -0.5653 | 0.0039  |
| LINC00426    | 0     | -0.5653 | <0.0001 |
| NUDT7        | 0.863 | -0.5652 | <0.0001 |
| TNFSF13B     | 0.636 | -0.565  | <0.0001 |
| KRT42P       | 0.85  | -0.5648 | 0.0007  |
| RFPL4A       | 0.856 | -0.5648 | <0.0001 |
| C1QB         | 0.92  | -0.5647 | <0.0001 |
| VAMP2        | 0.949 | -0.5646 | <0.0001 |
| F2           | 0.902 | -0.5645 | <0.0001 |
| IGLON5       | 0.936 | -0.5643 | 0.0006  |
| C1orf50      | 0.778 | -0.5643 | <0.0001 |
| BMX          | 0.893 | -0.5643 | <0.0001 |
| QRSL1P3      | 0.378 | -0.5638 | <0.0001 |
| ITK          | 0.831 | -0.5637 | <0.0001 |
| ZCCHC2       | 0.885 | -0.5637 | <0.0001 |
| ACAD8        | 0.859 | -0.5634 | <0.0001 |
| PGA4         | 0.821 | -0.563  | <0.0001 |
| ELF1         | 0.874 | -0.5629 | <0.0001 |
| PIK3R5       | 0.835 | -0.5628 | <0.0001 |
| NOCT         | 0.653 | -0.5625 | 0.0312  |
| TRBV23-1     | 0.52  | -0.5623 | 0.0129  |
| LOC100505915 | 0.634 | -0.5622 | <0.0001 |
| IL10         | 0.904 | -0.562  | <0.0001 |

|          |       |         |         |
|----------|-------|---------|---------|
| USP32P2  | 0.926 | -0.5619 | 0.0044  |
| CFAP74   | 0.715 | -0.5619 | 0.0107  |
| PLSCR1   | 0.925 | -0.5618 | <0.0001 |
| HOTAIRM1 | 0.836 | -0.5613 | 0.0005  |
| SOWAHC   | 0.584 | -0.5612 | <0.0001 |
| CCL3L1   | 0     | -0.5608 | <0.0001 |
| RASGRP4  | 0.835 | -0.5607 | <0.0001 |
| ANAPC16  | 0.547 | -0.5605 | <0.0001 |
| GSTA5    | 0.777 | -0.5605 | <0.0001 |
| IGKV1-5  | 0.876 | -0.5603 | 0.0003  |
| C11orf1  | 0.881 | -0.5602 | <0.0001 |
| DMRTA1   | 0.887 | -0.5602 | <0.0001 |
| SCNN1A   | 0.845 | -0.5601 | <0.0001 |
| ADRB2    | 0.88  | -0.5601 | <0.0001 |
| GEM      | 0.898 | -0.5595 | <0.0001 |
| CYP2D6   | 0.859 | -0.5592 | <0.0001 |
| SCRG1    | 0.889 | -0.559  | <0.0001 |
| HCK      | 0.918 | -0.559  | <0.0001 |
| MIR4708  | 0     | -0.5589 | 0.001   |
| TNFSF11  | 0.785 | -0.5587 | <0.0001 |
| ARSD     | 0.826 | -0.5586 | <0.0001 |
| LRRC25   | 0.861 | -0.5586 | <0.0001 |
| HMGN1P9  | 0     | -0.5585 | <0.0001 |
| TSHZ3    | 0.698 | -0.5585 | <0.0001 |
| MARCH1   | 0.749 | -0.5583 | 0.0007  |
| SIGLEC5  | 0.858 | -0.5583 | <0.0001 |
| DCTD     | 0.906 | -0.5583 | <0.0001 |
| MAPK10   | 0.925 | -0.5578 | <0.0001 |
| RPAIN    | 0.831 | -0.5577 | <0.0001 |
| MYLK     | 0.869 | -0.5575 | <0.0001 |
| APLNR    | 0.846 | -0.5574 | <0.0001 |
| CCDC69   | 0.862 | -0.5573 | <0.0001 |
| PDZD4    | 0.911 | -0.5573 | <0.0001 |

|           |       |         |         |
|-----------|-------|---------|---------|
| VPS9D1    | 0.947 | -0.5572 | 0.0104  |
| NLRP12    | 0.863 | -0.5572 | <0.0001 |
| ELFN1     | 0.794 | -0.5571 | <0.0001 |
| TBRG1     | 0.885 | -0.5571 | <0.0001 |
| ACAP1     | 0.692 | -0.557  | <0.0001 |
| BIN2      | 0.913 | -0.557  | <0.0001 |
| RGS2      | 0.78  | -0.5567 | <0.0001 |
| RAB3IL1   | 0.783 | -0.5566 | <0.0001 |
| ANKS4B    | 0.827 | -0.5566 | <0.0001 |
| SHC2      | 0.777 | -0.5563 | <0.0001 |
| CPAMD8    | 0.744 | -0.5562 | <0.0001 |
| MIR551B   | 0.138 | -0.556  | <0.0001 |
| PTGES3P2  | 0.176 | -0.5559 | <0.0001 |
| GDF6      | 0.604 | -0.5559 | <0.0001 |
| FMO4      | 0.868 | -0.5557 | <0.0001 |
| KCNE1     | 0.919 | -0.5554 | <0.0001 |
| VIM-AS1   | 0.75  | -0.5553 | 0.0288  |
| ACO1      | 0.905 | -0.5552 | <0.0001 |
| MIR4748   | 0     | -0.5551 | 0.001   |
| DIXDC1    | 0.69  | -0.5547 | <0.0001 |
| RCN3      | 0.892 | -0.5547 | <0.0001 |
| SNORD91B  | 0.766 | -0.5546 | 0.0033  |
| LOC653303 | 0     | -0.5544 | <0.0001 |
| FZD8      | 0.701 | -0.5543 | <0.0001 |
| SLC31A1   | 0.927 | -0.5543 | <0.0001 |
| MBD3L3    | 0.487 | -0.5541 | 0.0011  |
| TPK1      | 0.754 | -0.5532 | <0.0001 |
| SPINT2    | 0.913 | -0.5532 | <0.0001 |
| THYN1     | 0.801 | -0.5528 | <0.0001 |
| RRN3      | 0.908 | -0.5528 | <0.0001 |
| CFLAR     | 0.944 | -0.5528 | <0.0001 |
| ZZEF1     | 0.846 | -0.5526 | <0.0001 |
| LARP7     | 0.795 | -0.5525 | <0.0001 |



|              |       |         |         |
|--------------|-------|---------|---------|
| FDX1         | 0.91  | -0.5525 | <0.0001 |
| MMP19        | 0.898 | -0.5523 | <0.0001 |
| PHOSPHO1     | 0.938 | -0.5521 | <0.0001 |
| GGT1         | 0.731 | -0.552  | <0.0001 |
| MTMR9        | 0.838 | -0.552  | <0.0001 |
| PRR18        | 0.78  | -0.5519 | <0.0001 |
| ADCY5        | 0.917 | -0.5519 | <0.0001 |
| FCRL3        | 0.678 | -0.5512 | <0.0001 |
| NAMA         | 0.367 | -0.5511 | <0.0001 |
| LILRA6       | 0.834 | -0.5511 | <0.0001 |
| FGFR2        | 0.909 | -0.5509 | <0.0001 |
| MYH10        | 0.875 | -0.5508 | <0.0001 |
| LINC01176    | 0.511 | -0.5507 | 0.0387  |
| USF3         | 0     | -0.5507 | <0.0001 |
| LOC641746    | 0.504 | -0.5505 | 0.0007  |
| FCER1A       | 0.921 | -0.5505 | <0.0001 |
| METTL7A      | 0.922 | -0.5505 | <0.0001 |
| LOC340512    | 0     | -0.5504 | 0.0176  |
| MAN2B2       | 0.742 | -0.55   | <0.0001 |
| EFHD1        | 0.887 | -0.55   | <0.0001 |
| LOC101927391 | 0.467 | -0.5499 | <0.0001 |
| LRRK1        | 0.817 | -0.5498 | <0.0001 |
| LGI1         | 0.845 | -0.5497 | <0.0001 |
| IGLV9-49     | 0.706 | -0.5496 | 0.0011  |
| CLEC4F       | 0.791 | -0.5496 | <0.0001 |
| PFKFB3       | 0.917 | -0.5496 | <0.0001 |
| LRRN1        | 0.834 | -0.5495 | <0.0001 |
| ZNF662       | 0.871 | -0.5494 | <0.0001 |
| RNY3P7       | 0.021 | -0.5493 | <0.0001 |
| TSC22D3      | 0.877 | -0.5492 | <0.0001 |
| HMG5         | 0.785 | -0.5487 | <0.0001 |
| RNU1-21P     | 0.618 | -0.5486 | 0.026   |
| TDRD6        | 0.822 | -0.5485 | <0.0001 |

|              |       |         |         |
|--------------|-------|---------|---------|
| ZNF395       | 0.879 | -0.5485 | <0.0001 |
| RPSAP64      | 0.568 | -0.5478 | 0.0487  |
| IGHV1-46     | 0.542 | -0.5473 | 0.0009  |
| SNAR-C4      | 0.185 | -0.547  | 0.0001  |
| KIAA0040     | 0.889 | -0.547  | <0.0001 |
| LMNTD2       | 0.937 | -0.5469 | 0.0245  |
| TMPRSS6      | 0.812 | -0.5468 | <0.0001 |
| HIBCH        | 0.911 | -0.5467 | <0.0001 |
| ENKD1        | 0.656 | -0.5462 | <0.0001 |
| C4orf33      | 0.807 | -0.5457 | <0.0001 |
| CALR4P       | 0.19  | -0.5456 | <0.0001 |
| DGCR5        | 0.9   | -0.5456 | <0.0001 |
| CCL3         | 0.914 | -0.5456 | <0.0001 |
| TVP23A       | 0.921 | -0.5455 | 0.0045  |
| RNA5SP403    | 0.833 | -0.5454 | 0.0205  |
| MCL1         | 0.922 | -0.5453 | <0.0001 |
| NAT8         | 0.774 | -0.5452 | <0.0001 |
| LOC100129129 | 0.643 | -0.545  | 0.0006  |
| RPS6KA6      | 0.906 | -0.5449 | <0.0001 |
| LOC283731    | 0.656 | -0.5446 | 0.0064  |
| CEBPD        | 0.928 | -0.5445 | <0.0001 |
| KYNU         | 0.892 | -0.5439 | <0.0001 |
| ACOT1        | 0.648 | -0.5437 | <0.0001 |
| IL1RAPL2     | 0.899 | -0.5436 | <0.0001 |
| DLGAP2       | 0.886 | -0.5435 | <0.0001 |
| CHRNA4       | 0.94  | -0.5435 | <0.0001 |
| FLJ34503     | 0.818 | -0.5431 | <0.0001 |
| TLR2         | 0.906 | -0.543  | <0.0001 |
| ELOA         | 0.272 | -0.5429 | <0.0001 |
| ABCA1        | 0.922 | -0.5429 | <0.0001 |
| PTPN22       | 0.742 | -0.5428 | <0.0001 |
| IRF7         | 0.903 | -0.5426 | <0.0001 |
| PTPRN2       | 0.928 | -0.5425 | <0.0001 |

|            |       |         |         |
|------------|-------|---------|---------|
| RNA5SP307  | 0.887 | -0.5424 | 0.0297  |
| C2CD4B     | 0.853 | -0.5423 | <0.0001 |
| SRPRA      | 0.587 | -0.5422 | 0.0153  |
| ACSM2B     | 0.82  | -0.5421 | <0.0001 |
| TMEM132C   | 0.911 | -0.5421 | <0.0001 |
| RPS16P5    | 0.224 | -0.5418 | <0.0001 |
| DECR1      | 0.849 | -0.5418 | <0.0001 |
| FAM167B    | 0.834 | -0.5415 | <0.0001 |
| IL1RN      | 0.875 | -0.5415 | <0.0001 |
| IGHV4-34   | 0.784 | -0.5411 | 0.0168  |
| PEX3       | 0.827 | -0.541  | <0.0001 |
| NAB2       | 0.903 | -0.541  | <0.0001 |
| RNU5B-6P   | 0.301 | -0.5409 | <0.0001 |
| HMBOX1     | 0.872 | -0.5409 | <0.0001 |
| TIPARP     | 0.808 | -0.5406 | <0.0001 |
| CYP3A5     | 0.897 | -0.5404 | <0.0001 |
| MMP23B     | 0.825 | -0.5403 | <0.0001 |
| G0S2       | 0.862 | -0.5402 | <0.0001 |
| FAM160A1   | 0.884 | -0.5402 | <0.0001 |
| GRB14      | 0.909 | -0.5401 | <0.0001 |
| FAM122A    | 0.856 | -0.5398 | <0.0001 |
| N4BP2L2    | 0.775 | -0.5397 | <0.0001 |
| LIMS2      | 0.864 | -0.5397 | <0.0001 |
| UCA1       | 0.864 | -0.5396 | <0.0001 |
| DERA       | 0.785 | -0.5393 | <0.0001 |
| SLC7A7     | 0.911 | -0.539  | <0.0001 |
| SUDS3P1    | 0.257 | -0.5388 | <0.0001 |
| KIAA1109   | 0.88  | -0.5387 | <0.0001 |
| DOC2GP     | 0.593 | -0.5385 | 0.003   |
| TSNAXIP1   | 0.931 | -0.5385 | <0.0001 |
| EHHADH-AS1 | 0.677 | -0.5381 | 0.0062  |
| CYP4Z1     | 0.682 | -0.5381 | <0.0001 |
| RNA5SP409  | 0     | -0.538  | 0.0014  |

|            |       |         |         |
|------------|-------|---------|---------|
| RYKP1      | 0.258 | -0.5377 | <0.0001 |
| GSTP1      | 0.894 | -0.5376 | <0.0001 |
| ELMSAN1    | 0.872 | -0.5375 | 0.0111  |
| MIR4451    | 0.318 | -0.5372 | 0.0015  |
| SNORD18A   | 0.102 | -0.5372 | <0.0001 |
| SESN1      | 0.711 | -0.5372 | <0.0001 |
| TPRG1L     | 0.795 | -0.5372 | <0.0001 |
| GSTM2      | 0.823 | -0.5372 | <0.0001 |
| APOH       | 0.9   | -0.5371 | <0.0001 |
| BOK-AS1    | 0.582 | -0.537  | 0.0017  |
| MIR3180-4  | 0.701 | -0.537  | 0.0122  |
| PNMA2      | 0.808 | -0.5368 | <0.0001 |
| GTF2IRD2P1 | 0.073 | -0.5367 | <0.0001 |
| PXDN       | 0.684 | -0.5364 | <0.0001 |
| RND1       | 0.64  | -0.5362 | <0.0001 |
| MCCC1      | 0.703 | -0.5362 | <0.0001 |
| LOC285626  | 0     | -0.5361 | 0.0002  |
| SPIRE1     | 0.612 | -0.5361 | <0.0001 |
| ZNF684     | 0.842 | -0.5361 | <0.0001 |
| ANKRD37    | 0.871 | -0.5361 | <0.0001 |
| DEFA1B     | 0.726 | -0.5358 | <0.0001 |
| DHRS4L2    | 0.845 | -0.5358 | <0.0001 |
| TMEM204    | 0.75  | -0.5357 | <0.0001 |
| DPP10-AS1  | 0.932 | -0.5353 | 0.0415  |
| COL4A4     | 0.84  | -0.5351 | <0.0001 |
| BHLHE40    | 0.789 | -0.5349 | <0.0001 |
| RASD1      | 0.84  | -0.5349 | <0.0001 |
| HIBADH     | 0.81  | -0.5345 | <0.0001 |
| UGT3A1     | 0.736 | -0.5339 | <0.0001 |
| PRKRA      | 0.861 | -0.5336 | <0.0001 |
| SDC4P      | 0.895 | -0.5335 | 0.0013  |
| RCAN3AS    | 0.315 | -0.5334 | 0.0016  |
| PDIA5      | 0.877 | -0.5333 | <0.0001 |

|            |       |         |         |
|------------|-------|---------|---------|
| CLK4       | 0.898 | -0.5333 | <0.0001 |
| LOC414300  | 0.436 | -0.5332 | <0.0001 |
| HERPUD1    | 0.918 | -0.5331 | <0.0001 |
| CR1L       | 0.898 | -0.533  | <0.0001 |
| UBL3       | 0.878 | -0.5329 | <0.0001 |
| SUCLG2-AS1 | 0.114 | -0.5328 | <0.0001 |
| DGAT2      | 0.695 | -0.5324 | <0.0001 |
| TPRG1      | 0.85  | -0.5322 | <0.0001 |
| FAHD2B     | 0.957 | -0.5321 | 0.0049  |
| IGKV1D-13  | 0.847 | -0.532  | 0.003   |
| CDADC1     | 0.738 | -0.5318 | <0.0001 |
| EIF2S2P2   | 0     | -0.5317 | <0.0001 |
| PROM2      | 0.757 | -0.5317 | <0.0001 |
| SALL1      | 0.91  | -0.5317 | <0.0001 |
| YAF2       | 0.918 | -0.5317 | <0.0001 |
| RNY1P6     | 0     | -0.5316 | 0.0007  |
| ERVK3-2    | 0.896 | -0.5316 | 0.0161  |
| MIR3691    | 0.272 | -0.5315 | 0.0017  |
| TBC1D15    | 0.877 | -0.5314 | <0.0001 |
| IGKV3D-11  | 0.827 | -0.5311 | 0.0113  |
| H19        | 0.711 | -0.5311 | <0.0001 |
| GLYCTK     | 0.75  | -0.5311 | <0.0001 |
| CEPT1      | 0.856 | -0.5311 | <0.0001 |
| LOC692247  | 0.79  | -0.5309 | 0.0032  |
| IRF4       | 0.861 | -0.5308 | <0.0001 |
| DENND2A    | 0.714 | -0.5307 | <0.0001 |
| GZMH       | 0.913 | -0.5307 | <0.0001 |
| CD1C       | 0.934 | -0.5304 | <0.0001 |
| ISLR       | 0.848 | -0.5303 | <0.0001 |
| GLIS3      | 0.793 | -0.5301 | <0.0001 |
| KIAA1217   | 0.901 | -0.5299 | <0.0001 |
| MYO7A      | 0.928 | -0.5298 | <0.0001 |
| OSBPL11    | 0.797 | -0.5296 | <0.0001 |

|           |       |         |         |
|-----------|-------|---------|---------|
| KLF6      | 0.881 | -0.5291 | <0.0001 |
| EFS       | 0.903 | -0.529  | <0.0001 |
| PDE3B     | 0.901 | -0.5288 | <0.0001 |
| MYO15A    | 0.903 | -0.5287 | <0.0001 |
| LY86      | 0.931 | -0.5286 | <0.0001 |
| DPH1      | 0.959 | -0.5285 | 0.004   |
| SMIM2-AS1 | 0.861 | -0.5285 | 0.006   |
| C6orf99   | 0.776 | -0.5281 | <0.0001 |
| ABCG5     | 0.888 | -0.5276 | <0.0001 |
| CYP2A13   | 0.942 | -0.5272 | <0.0001 |
| CALN1     | 0.847 | -0.5268 | <0.0001 |
| ZBTB16    | 0.75  | -0.5267 | <0.0001 |
| RCSD1     | 0.866 | -0.5267 | <0.0001 |
| TTY1B     | 0     | -0.5265 | 0.0007  |
| SNORD90   | 0.864 | -0.5264 | 0.0301  |
| SIAE      | 0.836 | -0.5262 | <0.0001 |
| EDN1      | 0.736 | -0.5261 | <0.0001 |
| SYT7      | 0.904 | -0.526  | <0.0001 |
| GTSCR1    | 0.805 | -0.5259 | <0.0001 |
| LY9       | 0.868 | -0.5254 | <0.0001 |
| SEMA5A    | 0.903 | -0.5252 | <0.0001 |
| SEMA6A    | 0.723 | -0.5251 | <0.0001 |
| CFHR2     | 0.926 | -0.5251 | <0.0001 |
| HNF4A-AS1 | 0.728 | -0.525  | 0.0007  |
| SLC22A17  | 0.723 | -0.525  | <0.0001 |
| SLC3A1    | 0.633 | -0.5248 | <0.0001 |
| GAS6      | 0.885 | -0.5248 | <0.0001 |
| FBXL3     | 0.822 | -0.5243 | <0.0001 |
| SOCS6     | 0.842 | -0.5243 | <0.0001 |
| PRKG1     | 0.876 | -0.524  | <0.0001 |
| NCALD     | 0.771 | -0.5239 | <0.0001 |
| SLCO4A1   | 0.851 | -0.5238 | <0.0001 |
| CYP7B1    | 0.875 | -0.5236 | <0.0001 |

|            |       |         |         |
|------------|-------|---------|---------|
| RBP4       | 0.904 | -0.5234 | <0.0001 |
| TIGD2      | 0.84  | -0.5233 | <0.0001 |
| CES3       | 0.874 | -0.5233 | <0.0001 |
| SPG7       | 0.939 | -0.5232 | <0.0001 |
| CXCL6      | 0.912 | -0.523  | <0.0001 |
| CLU        | 0.932 | -0.5225 | <0.0001 |
| MIR665     | 0     | -0.5224 | <0.0001 |
| KLRC4      | 0.914 | -0.5218 | <0.0001 |
| USF1P1     | 0     | -0.5216 | <0.0001 |
| GPM6B      | 0.914 | -0.5216 | <0.0001 |
| COTL1      | 0.908 | -0.5215 | <0.0001 |
| LPAR6      | 0.701 | -0.5214 | <0.0001 |
| ABCB11     | 0.821 | -0.5214 | <0.0001 |
| LTBP1      | 0.921 | -0.5213 | <0.0001 |
| RCC2P7     | 0     | -0.5208 | <0.0001 |
| FCHSD2     | 0.858 | -0.5207 | <0.0001 |
| RCHY1      | 0.88  | -0.5203 | <0.0001 |
| KCNMA1-AS1 | 0     | -0.5202 | <0.0001 |
| NPAP1      | 0.954 | -0.5199 | 0.0181  |
| MEP1B      | 0.905 | -0.5198 | <0.0001 |
| MIR4720    | 0     | -0.5196 | 0.0006  |
| PRRG2      | 0.68  | -0.5195 | <0.0001 |
| FGL1       | 0.885 | -0.5194 | <0.0001 |
| NAV2       | 0.719 | -0.5193 | <0.0001 |
| COL5A1-AS1 | 0     | -0.5191 | <0.0001 |
| FGFR1OP2   | 0.793 | -0.519  | <0.0001 |
| EBF4       | 0.833 | -0.519  | <0.0001 |
| CMBL       | 0.823 | -0.5188 | <0.0001 |
| GALNT3     | 0.912 | -0.5187 | <0.0001 |
| LOC643542  | 0.171 | -0.5185 | 0.0001  |
| PDE4B      | 0.885 | -0.5184 | <0.0001 |
| MIR24-1    | 0.769 | -0.5182 | 0.003   |
| SCARNA5    | 0.776 | -0.5181 | 0.001   |

|              |       |         |         |
|--------------|-------|---------|---------|
| TRBV25-1     | 0     | -0.5179 | 0.0003  |
| CREBL2       | 0.897 | -0.5175 | <0.0001 |
| LINC01237    | 0     | -0.5172 | <0.0001 |
| F7           | 0.868 | -0.5172 | <0.0001 |
| ZNF540       | 0.844 | -0.5171 | <0.0001 |
| CCR2         | 0.872 | -0.517  | <0.0001 |
| MMACHC       | 0.799 | -0.5167 | <0.0001 |
| DEFA1        | 0.828 | -0.5166 | 0.0002  |
| CTSL         | 0.819 | -0.5164 | <0.0001 |
| VWA8         | 0.584 | -0.5161 | <0.0001 |
| GNB4         | 0.869 | -0.5161 | <0.0001 |
| MIR4287      | 0     | -0.5158 | 0.0022  |
| TSPAN32      | 0.815 | -0.5157 | <0.0001 |
| RAPGEF2      | 0.787 | -0.5152 | <0.0001 |
| LOC100129203 | 0.1   | -0.5148 | <0.0001 |
| MRPL39       | 0.821 | -0.5145 | <0.0001 |
| SERPINA7     | 0.885 | -0.5145 | <0.0001 |
| FBXW7        | 0.8   | -0.5144 | <0.0001 |
| MEI1         | 0.816 | -0.5144 | <0.0001 |
| QSOX1        | 0.855 | -0.5144 | <0.0001 |
| KLRC3        | 0.897 | -0.5144 | <0.0001 |
| ARRDC4       | 0.581 | -0.5143 | <0.0001 |
| C21orf91-OT1 | 0.706 | -0.5143 | <0.0001 |
| EI24         | 0.888 | -0.5143 | <0.0001 |
| MAN1A1       | 0.912 | -0.5142 | <0.0001 |
| FILIP1L      | 0.924 | -0.5142 | <0.0001 |
| MRS2P2       | 0.35  | -0.5141 | <0.0001 |
| LGR6         | 0.86  | -0.5141 | <0.0001 |
| CLDN14       | 0.855 | -0.5139 | <0.0001 |
| CXCR6        | 0.895 | -0.5139 | <0.0001 |
| GCHFR        | 0.904 | -0.5139 | <0.0001 |
| NAPSA        | 0.91  | -0.5136 | <0.0001 |
| OR7E100P     | 0     | -0.5134 | <0.0001 |



|           |       |         |         |
|-----------|-------|---------|---------|
| POM121L9P | 0.906 | -0.5133 | 0.0004  |
| BOK       | 0.801 | -0.513  | <0.0001 |
| PKHD1L1   | 0.788 | -0.5129 | <0.0001 |
| AKAP12    | 0.895 | -0.5129 | <0.0001 |
| GALNT14   | 0.911 | -0.5129 | <0.0001 |
| SDHA      | 0.911 | -0.5129 | <0.0001 |
| TSHR      | 0.926 | -0.5127 | <0.0001 |
| NUDT16P1  | 0.848 | -0.5126 | <0.0001 |
| LOC729603 | 0.643 | -0.5125 | <0.0001 |
| ZAP70     | 0.86  | -0.5123 | <0.0001 |
| FHL2      | 0.881 | -0.5123 | <0.0001 |
| GAMT      | 0.912 | -0.5123 | <0.0001 |
| KLHL33    | 0.918 | -0.5122 | 0.003   |
| LINC00861 | 0.401 | -0.512  | <0.0001 |
| GPR18     | 0.895 | -0.512  | <0.0001 |
| MDN1      | 0.92  | -0.512  | <0.0001 |
| SERPINA6  | 0.908 | -0.5119 | <0.0001 |
| PARGP1    | 0.577 | -0.5118 | 0.0328  |
| STAP1     | 0.729 | -0.5118 | <0.0001 |
| LOC729867 | 0     | -0.5117 | 0.0271  |
| ASCL2     | 0.809 | -0.5116 | <0.0001 |
| IGSF9     | 0.855 | -0.5115 | <0.0001 |
| PRDM2     | 0.918 | -0.5113 | <0.0001 |
| BNIP3L    | 0.773 | -0.5111 | <0.0001 |
| SORD      | 0.89  | -0.5109 | <0.0001 |
| MIR29C    | 0.441 | -0.5108 | 0.0003  |
| RN7SL614P | 0     | -0.5108 | <0.0001 |
| IQGAP2    | 0.913 | -0.5107 | <0.0001 |
| PHBP19    | 0.455 | -0.5106 | <0.0001 |
| SERP2     | 0.508 | -0.5106 | <0.0001 |
| ANKFY1    | 0.781 | -0.5106 | <0.0001 |
| ALG1L13P  | 0     | -0.5102 | <0.0001 |
| WASF3     | 0.796 | -0.5102 | <0.0001 |

|          |       |         |         |
|----------|-------|---------|---------|
| CLEC2B   | 0.915 | -0.51   | <0.0001 |
| CEP85L   | 0.932 | -0.5099 | 0.0091  |
| BLK      | 0.907 | -0.5097 | <0.0001 |
| SMCR6    | 0.541 | -0.5096 | 0.0012  |
| TTC3-AS1 | 0.531 | -0.5096 | 0.0018  |
| MUC3B    | 0.635 | -0.5096 | <0.0001 |
| WDFY3    | 0.805 | -0.5096 | <0.0001 |
| MARK2P9  | 0.629 | -0.5095 | 0.0128  |
| HMGB3P7  | 0     | -0.5093 | <0.0001 |
| MSRB1    | 0.883 | -0.509  | 0.0005  |
| TMOD1    | 0.711 | -0.5089 | <0.0001 |
| KDSR     | 0.721 | -0.5087 | <0.0001 |
| FAM74A1  | 0.716 | -0.5079 | 0.0021  |
| MIR522   | 0.319 | -0.5079 | 0.0026  |
| ADAP2    | 0.863 | -0.5079 | <0.0001 |
| RGPD1    | 0.868 | -0.5079 | <0.0001 |
| NCF1     | 0.647 | -0.5078 | <0.0001 |
| CCNH     | 0.882 | -0.5078 | <0.0001 |
| TRMT11   | 0.917 | -0.5077 | <0.0001 |
| SNORD89  | 0.892 | -0.5075 | 0.0002  |
| SH3TC1   | 0.761 | -0.5075 | <0.0001 |
| IGLV1-44 | 0.765 | -0.5075 | <0.0001 |
| RRN3P3   | 0.922 | -0.5071 | 0.0185  |
| ARVCF    | 0.911 | -0.507  | <0.0001 |
| ERN1     | 0.83  | -0.5069 | <0.0001 |
| COL6A2   | 0.884 | -0.5069 | <0.0001 |
| BHMT2    | 0.728 | -0.5067 | <0.0001 |
| SERPINA5 | 0.899 | -0.5067 | <0.0001 |
| DIP2C    | 0.789 | -0.5066 | <0.0001 |
| MIR4486  | 0     | -0.5065 | 0.0026  |
| TRIM13   | 0.608 | -0.5065 | <0.0001 |
| PCBD1    | 0.868 | -0.5065 | <0.0001 |
| SEC24D   | 0.897 | -0.5058 | <0.0001 |

|              |       |         |         |
|--------------|-------|---------|---------|
| CCDC90B      | 0.807 | -0.5055 | <0.0001 |
| SOX5         | 0.91  | -0.5055 | <0.0001 |
| ZBTB21       | 0.921 | -0.5053 | 0.0107  |
| TNFRSF1A     | 0.922 | -0.5053 | <0.0001 |
| ALDH1A3      | 0.88  | -0.5052 | <0.0001 |
| SDSL         | 0.717 | -0.5051 | <0.0001 |
| DCHS1        | 0.921 | -0.5051 | <0.0001 |
| AK4P4        | 0     | -0.505  | <0.0001 |
| RASL11B      | 0.703 | -0.5049 | <0.0001 |
| NAV2-AS1     | 0     | -0.5044 | 0.0007  |
| TNFSF12      | 0.797 | -0.5044 | <0.0001 |
| AHSG         | 0.836 | -0.5043 | <0.0001 |
| DAPP1        | 0.843 | -0.5043 | <0.0001 |
| SIRT3        | 0.853 | -0.5043 | <0.0001 |
| HECA         | 0.847 | -0.5039 | <0.0001 |
| RBPMS        | 0.924 | -0.5038 | <0.0001 |
| PARP6        | 0.773 | -0.5036 | <0.0001 |
| TMEM86B      | 0.773 | -0.5034 | <0.0001 |
| FES          | 0.869 | -0.5034 | <0.0001 |
| MIR3150B     | 0.246 | -0.5032 | 0.0025  |
| DAAM1        | 0.595 | -0.5031 | <0.0001 |
| TRDV1        | 0.924 | -0.5028 | 0.0196  |
| ORM1         | 0.897 | -0.5028 | <0.0001 |
| KCNAB3       | 0.929 | -0.5027 | <0.0001 |
| LOC100287477 | 0     | -0.5026 | 0.0325  |
| EPB41L3      | 0.913 | -0.5026 | <0.0001 |
| KAT2B        | 0.755 | -0.5025 | <0.0001 |
| DOCK5        | 0.921 | -0.5025 | <0.0001 |
| TPRG1-AS1    | 0.722 | -0.5023 | 0.0327  |
| PRR22        | 0.906 | -0.5021 | <0.0001 |
| LURAP1L      | 0.858 | -0.502  | 0.0009  |
| GGT6         | 0.825 | -0.502  | <0.0001 |
| NPDC1        | 0.734 | -0.5019 | <0.0001 |

|           |       |         |         |
|-----------|-------|---------|---------|
| PLEK      | 0.851 | -0.5018 | <0.0001 |
| SFXN2     | 0.749 | -0.5017 | <0.0001 |
| LINC00366 | 0.694 | -0.5013 | 0.0228  |
| ARHGAP42  | 0.718 | -0.5012 | <0.0001 |
| INHBC     | 0.808 | -0.5009 | <0.0001 |
| ALDH9A1   | 0.909 | -0.5009 | <0.0001 |
| APMAP     | 0.473 | -0.5005 | <0.0001 |
| PAH       | 0.895 | -0.5005 | <0.0001 |
| CABP4     | 0.83  | -0.5004 | <0.0001 |
| HADHB     | 0.902 | -0.5004 | <0.0001 |
| BTBD19    | 0.9   | -0.5002 | 0.0003  |
| AEBP1     | 0.879 | -0.5002 | <0.0001 |
| BRINP2    | 0.925 | -0.5001 | 0.0102  |
| MFSD8     | 0.835 | -0.5001 | <0.0001 |
| HES1      | 0.881 | -0.5001 | <0.0001 |
| SGK1      | 0.794 | -0.5    | <0.0001 |
| TMEM255B  | 0.854 | -0.4998 | 0.0007  |
| MIR3621   | 0.338 | -0.4997 | 0.0031  |
| CNRIP1    | 0.845 | -0.4997 | <0.0001 |
| DNAJB14   | 0.746 | -0.4991 | <0.0001 |
| HDAC9     | 0.883 | -0.4989 | <0.0001 |
| PIK3AP1   | 0.644 | -0.4985 | <0.0001 |
| LOC642361 | 0.413 | -0.4984 | <0.0001 |
| LPXN      | 0.796 | -0.4984 | <0.0001 |
| CCDC26    | 0.848 | -0.4983 | <0.0001 |
| USO1      | 0.899 | -0.4983 | <0.0001 |
| MEG9      | 0.835 | -0.4981 | 0.0022  |
| KRT16P3   | 0.832 | -0.4981 | 0.0187  |
| ICAM3     | 0.857 | -0.4978 | <0.0001 |
| ID2B      | 0.913 | -0.4977 | 0.0002  |
| LINC00604 | 0.682 | -0.4977 | 0.0215  |
| HEY2      | 0.749 | -0.4975 | <0.0001 |
| DIO1      | 0.625 | -0.4974 | <0.0001 |

|           |       |         |         |
|-----------|-------|---------|---------|
| BEX1      | 0.906 | -0.4974 | <0.0001 |
| CYP3A7    | 0.918 | -0.4974 | <0.0001 |
| GSTA1     | 0.927 | -0.4974 | <0.0001 |
| ZCWPW1    | 0.76  | -0.4973 | <0.0001 |
| CD274     | 0.888 | -0.4973 | <0.0001 |
| TMEM30B   | 0.814 | -0.4971 | <0.0001 |
| CD209     | 0.891 | -0.4971 | <0.0001 |
| AGAP7P    | 0     | -0.4969 | <0.0001 |
| A1CF      | 0.684 | -0.4969 | <0.0001 |
| NADK      | 0.916 | -0.4969 | <0.0001 |
| COL18A1   | 0.906 | -0.4968 | <0.0001 |
| TF        | 0.886 | -0.4965 | <0.0001 |
| MTRNR2L8  | 0.757 | -0.4964 | 0.0092  |
| FGD3      | 0.621 | -0.4962 | <0.0001 |
| RWDD2B    | 0.829 | -0.4962 | <0.0001 |
| TNFRSF17  | 0.856 | -0.4962 | <0.0001 |
| LINC00402 | 0.363 | -0.496  | <0.0001 |
| TNFSF13   | 0.942 | -0.4955 | 0.0018  |
| PRUNE2    | 0.645 | -0.4953 | <0.0001 |
| GC        | 0.886 | -0.4953 | <0.0001 |
| CLC       | 0.817 | -0.4951 | <0.0001 |
| CYBRD1    | 0.892 | -0.4951 | <0.0001 |
| SDCBP2    | 0.8   | -0.4948 | <0.0001 |
| STPG2     | 0.91  | -0.4945 | 0.0057  |
| MAST4     | 0.692 | -0.4945 | <0.0001 |
| SRSF4     | 0.922 | -0.4943 | 0.0009  |
| ACER1     | 0.799 | -0.4941 | <0.0001 |
| DICER1    | 0.89  | -0.4941 | <0.0001 |
| CD48      | 0.926 | -0.4941 | <0.0001 |
| LINC01625 | 0.384 | -0.494  | <0.0001 |
| CES2      | 0.906 | -0.494  | <0.0001 |
| NEXN      | 0.758 | -0.4938 | <0.0001 |
| MIR365B   | 0.48  | -0.4937 | 0.0031  |

|            |       |         |         |
|------------|-------|---------|---------|
| HIGD1A     | 0.896 | -0.4937 | <0.0001 |
| CLEC4C     | 0.791 | -0.4936 | <0.0001 |
| PLEKHH2    | 0.828 | -0.4934 | <0.0001 |
| MGC70870   | 0.697 | -0.4929 | <0.0001 |
| ATG16L2    | 0.907 | -0.4927 | <0.0001 |
| DDTL       | 0.853 | -0.4925 | <0.0001 |
| NCOA7-AS1  | 0     | -0.4923 | <0.0001 |
| USP17L19   | 0     | -0.4921 | 0.0007  |
| USP17L30   | 0.51  | -0.4921 | 0.0281  |
| MIR29B2    | 0.659 | -0.4921 | 0.0318  |
| FAM83H-AS1 | 0.305 | -0.4917 | 0.0029  |
| GATM       | 0.883 | -0.4917 | <0.0001 |
| DOCK2      | 0.865 | -0.4916 | <0.0001 |
| SLC2A2     | 0.879 | -0.4916 | <0.0001 |
| CRTAM      | 0.878 | -0.4915 | <0.0001 |
| C9orf78    | 0.684 | -0.4913 | <0.0001 |
| CCL4L2     | 0.915 | -0.4912 | 0.0288  |
| PSMC1P9    | 0     | -0.4912 | <0.0001 |
| CHRDL1     | 0.803 | -0.4909 | <0.0001 |
| LOC606724  | 0.723 | -0.4904 | 0.0003  |
| SLC39A8    | 0.903 | -0.4903 | <0.0001 |
| AIF1       | 0.946 | -0.4901 | <0.0001 |
| MYCBP2     | 0.816 | -0.49   | <0.0001 |
| TNRC6A     | 0.902 | -0.4899 | <0.0001 |
| CYP27A1    | 0.887 | -0.4898 | <0.0001 |
| RNY5       | 0.908 | -0.4896 | 0.0469  |
| NBEA       | 0.776 | -0.4896 | <0.0001 |
| HMGNI1P8   | 0     | -0.4895 | <0.0001 |
| BTBD16     | 0.676 | -0.4895 | <0.0001 |
| ATP1B2     | 0.898 | -0.4895 | <0.0001 |
| MAMDC2-AS1 | 0.865 | -0.4894 | 0.0063  |
| CCDC146    | 0.775 | -0.4894 | <0.0001 |
| EYA2       | 0.89  | -0.4892 | <0.0001 |

|              |       |         |         |
|--------------|-------|---------|---------|
| DEFB1        | 0.895 | -0.489  | <0.0001 |
| RAB11B-AS1   | 0.912 | -0.4888 | 0.0384  |
| COL26A1      | 0.842 | -0.4887 | 0.0006  |
| ECHDC3       | 0.759 | -0.4887 | <0.0001 |
| NOS3         | 0.919 | -0.4887 | <0.0001 |
| PPP1R15A     | 0.848 | -0.4885 | <0.0001 |
| PTGDS        | 0.811 | -0.4884 | <0.0001 |
| PF4          | 0.888 | -0.4884 | <0.0001 |
| CCL16        | 0.7   | -0.4883 | <0.0001 |
| SAA2         | 0.826 | -0.4883 | <0.0001 |
| GTF2IRD2B    | 0.895 | -0.4881 | <0.0001 |
| SHB          | 0.91  | -0.488  | <0.0001 |
| RAB37        | 0.764 | -0.4879 | <0.0001 |
| ACCS         | 0.823 | -0.4879 | <0.0001 |
| GZMA         | 0.901 | -0.4878 | <0.0001 |
| EBI3         | 0.922 | -0.4876 | <0.0001 |
| DNAJC15      | 0.766 | -0.4874 | <0.0001 |
| PID1         | 0.884 | -0.4873 | <0.0001 |
| MIR1226      | 0.857 | -0.4871 | 0.0049  |
| LOC260339    | 0.758 | -0.487  | 0.0177  |
| LOC101927143 | 0.294 | -0.487  | <0.0001 |
| PRKCQ        | 0.904 | -0.4865 | <0.0001 |
| TAB2         | 0.551 | -0.4862 | <0.0001 |
| AMPH         | 0.909 | -0.4862 | <0.0001 |
| SMCO1        | 0.361 | -0.4858 | <0.0001 |
| SERPINA1     | 0.915 | -0.4858 | <0.0001 |
| C16orf70     | 0.871 | -0.4856 | <0.0001 |
| FUT6         | 0.879 | -0.4856 | <0.0001 |
| NAP1L1P2     | 0     | -0.4853 | <0.0001 |
| ETNK2        | 0.843 | -0.4853 | <0.0001 |
| HOMER2       | 0.697 | -0.485  | <0.0001 |
| GRIA3        | 0.803 | -0.485  | <0.0001 |
| DHX58        | 0.804 | -0.485  | <0.0001 |

|           |       |         |         |
|-----------|-------|---------|---------|
| CD38      | 0.842 | -0.4849 | <0.0001 |
| RNF112    | 0.748 | -0.4843 | <0.0001 |
| MIR3156-1 | 0.301 | -0.4842 | 0.004   |
| UBE2D3    | 0.891 | -0.4842 | <0.0001 |
| FOLR2     | 0.944 | -0.4842 | <0.0001 |
| PDE1B     | 0.915 | -0.4841 | <0.0001 |
| CTIF      | 0.902 | -0.4838 | 0.0008  |
| GPSM3     | 0.895 | -0.4838 | <0.0001 |
| MAOB      | 0.895 | -0.4836 | <0.0001 |
| CD33      | 0.909 | -0.4836 | <0.0001 |
| OR10AB1P  | 0.806 | -0.4835 | 0.0195  |
| CRK       | 0.915 | -0.4835 | <0.0001 |
| SYAP1     | 0.782 | -0.4831 | <0.0001 |
| CLMP      | 0.738 | -0.4827 | <0.0001 |
| CYBB      | 0.921 | -0.4825 | <0.0001 |
| C4BPA     | 0.825 | -0.4822 | <0.0001 |
| HSPB6     | 0.857 | -0.4822 | <0.0001 |
| FAM126B   | 0.846 | -0.4821 | <0.0001 |
| FRMD6     | 0.901 | -0.4821 | <0.0001 |
| GSDMB     | 0.797 | -0.482  | <0.0001 |
| OXER1     | 0.859 | -0.482  | <0.0001 |
| GSTTP2    | 0     | -0.4819 | <0.0001 |
| PGRMC2    | 0.773 | -0.4818 | <0.0001 |
| UTP3      | 0.852 | -0.4818 | <0.0001 |
| FMOD      | 0.861 | -0.4817 | <0.0001 |
| MIR28     | 0     | -0.4815 | 0.0001  |
| CA3       | 0.905 | -0.4814 | <0.0001 |
| KIF26A    | 0.694 | -0.4813 | <0.0001 |
| RNA5SP43  | 0     | -0.4811 | 0.0001  |
| NIPSNAP3A | 0.525 | -0.481  | <0.0001 |
| GPRIN2    | 0.772 | -0.4808 | <0.0001 |
| TMEM121   | 0.877 | -0.4807 | <0.0001 |
| BAZ2B     | 0.881 | -0.4806 | <0.0001 |



|              |       |         |         |
|--------------|-------|---------|---------|
| ATMIN        | 0.783 | -0.4805 | <0.0001 |
| MIR1298      | 0.751 | -0.4804 | 0.0074  |
| PRKAG2-AS1   | 0.508 | -0.4804 | <0.0001 |
| DENND2D      | 0.802 | -0.4804 | <0.0001 |
| VKORC1       | 0.907 | -0.4799 | <0.0001 |
| NPBWR1       | 0.87  | -0.4797 | <0.0001 |
| CLDN2        | 0.821 | -0.4796 | <0.0001 |
| GSE1         | 0.925 | -0.4795 | 0.008   |
| SLC5A3       | 0.882 | -0.4795 | <0.0001 |
| CFB          | 0.947 | -0.4793 | 0.0003  |
| A2MP1        | 0.755 | -0.4793 | 0.0009  |
| CCNB1IP1     | 0.589 | -0.479  | <0.0001 |
| SLC16A13     | 0.808 | -0.479  | <0.0001 |
| GP6          | 0.843 | -0.4789 | <0.0001 |
| UGT2B15      | 0.921 | -0.4788 | <0.0001 |
| PEBP1        | 0.919 | -0.4785 | <0.0001 |
| LDLRAD4-AS1  | 0.71  | -0.4784 | 0.0003  |
| NCR1         | 0.838 | -0.4782 | <0.0001 |
| POR          | 0.9   | -0.4779 | <0.0001 |
| LOC101929718 | 0.239 | -0.4775 | <0.0001 |
| MIR4327      | 0.217 | -0.4772 | 0.0045  |
| SLC26A5      | 0.726 | -0.4771 | <0.0001 |
| ASB13        | 0.836 | -0.4769 | <0.0001 |
| PITRM1-AS1   | 0.91  | -0.4767 | 0.0384  |
| METTL7B      | 0.848 | -0.4761 | <0.0001 |
| KCNH7        | 0.873 | -0.4761 | <0.0001 |
| BAIAP2       | 0.897 | -0.4761 | <0.0001 |
| CRTAC1       | 0.91  | -0.476  | <0.0001 |
| BMPR1B       | 0.902 | -0.4759 | <0.0001 |
| CLDN11       | 0.791 | -0.4757 | <0.0001 |
| MPRIP        | 0.894 | -0.4753 | <0.0001 |
| ABCD3        | 0.914 | -0.4752 | <0.0001 |
| MIR429       | 0.868 | -0.4751 | 0.0234  |

|              |       |         |         |
|--------------|-------|---------|---------|
| NCF1B        | 0.783 | -0.475  | 0.0021  |
| SH3BP5       | 0.915 | -0.4749 | <0.0001 |
| ETFBKMT      | 0.476 | -0.4746 | <0.0001 |
| SFTPD        | 0.875 | -0.4746 | <0.0001 |
| KRT19        | 0.916 | -0.4746 | <0.0001 |
| CYLD         | 0.886 | -0.4745 | <0.0001 |
| PTMS         | 0.928 | -0.4744 | <0.0001 |
| GOLGA8K      | 0.684 | -0.4742 | 0.0103  |
| MRPL34       | 0.704 | -0.4741 | <0.0001 |
| MAGI1        | 0.934 | -0.4741 | <0.0001 |
| ANKRD20A7P   | 0     | -0.4737 | <0.0001 |
| SCN11A       | 0.838 | -0.4737 | <0.0001 |
| KLRC1        | 0.857 | -0.4736 | <0.0001 |
| RGS11        | 0.939 | -0.4735 | <0.0001 |
| ARHGAP24     | 0.773 | -0.4734 | <0.0001 |
| FOSL1        | 0.856 | -0.4734 | <0.0001 |
| ATXN8        | 0     | -0.4733 | 0.0432  |
| PLK3         | 0.933 | -0.4732 | <0.0001 |
| MIER1        | 0.81  | -0.4731 | <0.0001 |
| LOC100506098 | 0.428 | -0.4728 | <0.0001 |
| FDX1P1       | 0     | -0.4726 | <0.0001 |
| C11orf71     | 0.722 | -0.4726 | <0.0001 |
| COL6A1       | 0.905 | -0.4721 | <0.0001 |
| CTSW         | 0.868 | -0.4719 | <0.0001 |
| GAS2         | 0.658 | -0.4718 | <0.0001 |
| SPATA31A7    | 0.754 | -0.4717 | 0.0414  |
| ZNF503-AS1   | 0.859 | -0.4715 | 0.003   |
| AMBP         | 0.922 | -0.4711 | <0.0001 |
| NFKBIA       | 0.877 | -0.471  | <0.0001 |
| MIR501       | 0     | -0.4709 | 0.0049  |
| SNORD116-26  | 0.388 | -0.4709 | <0.0001 |
| RASSF2       | 0.893 | -0.4708 | <0.0001 |
| FAM229A      | 0.913 | -0.4707 | 0.029   |

|           |       |         |         |
|-----------|-------|---------|---------|
| TEC       | 0.91  | -0.4707 | <0.0001 |
| TOR4A     | 0.775 | -0.4706 | <0.0001 |
| ERMARD    | 0.675 | -0.4704 | <0.0001 |
| GSAP      | 0.795 | -0.4704 | <0.0001 |
| PDSS2     | 0.788 | -0.4703 | <0.0001 |
| GIMAP1    | 0.916 | -0.4702 | <0.0001 |
| ARHGEF6   | 0.817 | -0.4701 | <0.0001 |
| CPXM2     | 0.816 | -0.47   | <0.0001 |
| TESK2     | 0.914 | -0.47   | <0.0001 |
| ATG2B     | 0.925 | -0.47   | <0.0001 |
| FAM107B   | 0.613 | -0.4699 | <0.0001 |
| RBMS1     | 0.899 | -0.4699 | <0.0001 |
| TVP23C    | 0.947 | -0.4694 | 0.0457  |
| SNORD111B | 0.57  | -0.4693 | 0.0123  |
| WDFY2     | 0.897 | -0.4693 | <0.0001 |
| JAK2      | 0.855 | -0.469  | <0.0001 |
| TDRD1     | 0.788 | -0.4689 | <0.0001 |
| CAMK2D    | 0.8   | -0.4689 | <0.0001 |
| SOX10     | 0.874 | -0.4689 | <0.0001 |
| CNDP2     | 0.786 | -0.4688 | <0.0001 |
| EPS8L1    | 0.833 | -0.4685 | <0.0001 |
| IFI16     | 0.908 | -0.4684 | <0.0001 |
| AKAP2     | 0.923 | -0.4683 | 0.0053  |
| PNPLA4    | 0.759 | -0.4682 | <0.0001 |
| MIR1225   | 0.878 | -0.4679 | 0.0204  |
| ADRB1     | 0.819 | -0.4678 | <0.0001 |
| RBM7      | 0.891 | -0.4677 | <0.0001 |
| TCF25     | 0.707 | -0.4676 | <0.0001 |
| LINC00211 | 0.236 | -0.4675 | <0.0001 |
| CLEC19A   | 0.726 | -0.4674 | 0.0136  |
| SCO1      | 0.847 | -0.4672 | <0.0001 |
| SH3GL2    | 0.884 | -0.4671 | <0.0001 |
| MIR4776-2 | 0     | -0.467  | 0.0054  |

|           |       |         |         |
|-----------|-------|---------|---------|
| PMEL      | 0.765 | -0.4669 | <0.0001 |
| C16orf54  | 0.896 | -0.4669 | <0.0001 |
| MNDA      | 0.856 | -0.4668 | <0.0001 |
| IGLV1-40  | 0.346 | -0.4667 | <0.0001 |
| DPPA4     | 0.823 | -0.4665 | <0.0001 |
| NRP2      | 0.867 | -0.4665 | <0.0001 |
| ST6GAL1   | 0.887 | -0.4664 | <0.0001 |
| CBX3P3    | 0.424 | -0.4663 | <0.0001 |
| RPL13P12  | 0     | -0.4661 | <0.0001 |
| CCR7      | 0.865 | -0.4661 | <0.0001 |
| CHRM3-AS2 | 0.547 | -0.466  | <0.0001 |
| IL27      | 0.859 | -0.466  | <0.0001 |
| ACY3      | 0.712 | -0.4653 | <0.0001 |
| MIR3190   | 0     | -0.4652 | 0.0045  |
| LOC729305 | 0.305 | -0.4651 | 0.0027  |
| NCAM2     | 0.732 | -0.465  | <0.0001 |
| TNF       | 0.847 | -0.465  | <0.0001 |
| APCDD1    | 0.801 | -0.4648 | <0.0001 |
| PRR32     | 0.702 | -0.4647 | <0.0001 |
| RIPK3     | 0.677 | -0.4645 | <0.0001 |
| MIR10A    | 0.835 | -0.4638 | 0.0002  |
| OLFML1    | 0.698 | -0.4637 | <0.0001 |
| THSD4     | 0.798 | -0.4637 | <0.0001 |
| EFCC1     | 0.829 | -0.4636 | 0.0002  |
| NLRP14    | 0.844 | -0.4635 | <0.0001 |
| VAV1      | 0.883 | -0.4634 | <0.0001 |
| MMP25     | 0.771 | -0.4633 | <0.0001 |
| NFX1      | 0.779 | -0.4633 | <0.0001 |
| ARHGEF10L | 0.88  | -0.4633 | <0.0001 |
| CLN5      | 0.791 | -0.463  | <0.0001 |
| PVRIG     | 0.837 | -0.463  | <0.0001 |
| GNRH2     | 0.905 | -0.463  | <0.0001 |
| CHRNE     | 0.906 | -0.463  | <0.0001 |

|              |       |         |         |
|--------------|-------|---------|---------|
| CNBP         | 0.939 | -0.463  | <0.0001 |
| SNRK         | 0.916 | -0.4628 | <0.0001 |
| TNKS2-AS1    | 0.558 | -0.4625 | 0.0098  |
| GRHL1        | 0.885 | -0.462  | <0.0001 |
| ARAP1-AS2    | 0.754 | -0.4618 | 0.04    |
| SLFN11       | 0.73  | -0.4616 | <0.0001 |
| FTCDNL1      | 0.702 | -0.4615 | 0.0004  |
| HINT2        | 0.849 | -0.4614 | <0.0001 |
| DDX60L       | 0.748 | -0.4613 | <0.0001 |
| PARVA        | 0.859 | -0.4613 | <0.0001 |
| IFNG-AS1     | 0.682 | -0.4612 | 0.034   |
| TAB3P1       | 0.637 | -0.4611 | 0.0117  |
| AIM2         | 0.791 | -0.4611 | <0.0001 |
| MIR4676      | 0     | -0.461  | 0.006   |
| FREM1        | 0.795 | -0.4608 | <0.0001 |
| SLC34A1      | 0.905 | -0.4608 | <0.0001 |
| SCN9A        | 0.734 | -0.4607 | <0.0001 |
| IFT88        | 0.825 | -0.4606 | <0.0001 |
| SMIM12       | 0.799 | -0.4604 | 0.0008  |
| MEG3         | 0.92  | -0.4603 | 0.0003  |
| GK3P         | 0.892 | -0.4601 | 0.0003  |
| STRADB       | 0.829 | -0.4601 | <0.0001 |
| EFCAB6       | 0.807 | -0.46   | <0.0001 |
| TMEM30A      | 0.808 | -0.46   | <0.0001 |
| CDKN2AIP     | 0.85  | -0.4599 | <0.0001 |
| IGFLR1       | 0.953 | -0.4595 | 0.0243  |
| ABCD4        | 0.717 | -0.4595 | <0.0001 |
| ALKBH7       | 0.81  | -0.4594 | <0.0001 |
| LCK          | 0.876 | -0.4593 | <0.0001 |
| MGC12916     | 0.605 | -0.4592 | 0.0015  |
| DES          | 0.93  | -0.4592 | <0.0001 |
| LOC100131289 | 0.113 | -0.4591 | <0.0001 |
| MFNG         | 0.901 | -0.4591 | <0.0001 |

|           |       |         |         |
|-----------|-------|---------|---------|
| RN7SKP163 | 0.292 | -0.459  | <0.0001 |
| P2RY10    | 0.858 | -0.459  | <0.0001 |
| ADSSL1    | 0.83  | -0.4589 | <0.0001 |
| TRIM15    | 0.894 | -0.4587 | <0.0001 |
| FCAR      | 0.932 | -0.4585 | <0.0001 |
| IFI44L    | 0.871 | -0.4584 | <0.0001 |
| ANO3      | 0.785 | -0.4583 | <0.0001 |
| CHD9      | 0.809 | -0.4582 | <0.0001 |
| ODF2L     | 0.557 | -0.4581 | <0.0001 |
| OTUD4     | 0.925 | -0.4579 | <0.0001 |
| RNA5SP60  | 0.806 | -0.4577 | 0.0346  |
| C10orf126 | 0.767 | -0.4575 | <0.0001 |
| ANKRD44   | 0.813 | -0.4575 | <0.0001 |
| MIR645    | 0.818 | -0.4574 | 0.0249  |
| DGCR6     | 0.834 | -0.4573 | <0.0001 |
| DPRXP4    | 0.134 | -0.4572 | <0.0001 |
| GZMM      | 0.871 | -0.4572 | <0.0001 |
| CD180     | 0.934 | -0.4572 | <0.0001 |
| AGMAT     | 0.768 | -0.4569 | <0.0001 |
| PRMT9     | 0.917 | -0.4568 | 0.0411  |
| MAP3K6    | 0.741 | -0.4567 | <0.0001 |
| RN7SL552P | 0.163 | -0.4566 | <0.0001 |
| ITCH      | 0.82  | -0.4565 | <0.0001 |
| SEBOX     | 0.747 | -0.4563 | <0.0001 |
| IL5RA     | 0.782 | -0.456  | <0.0001 |
| RABEP1    | 0.921 | -0.456  | <0.0001 |
| ITPRIP    | 0.779 | -0.4559 | <0.0001 |
| LOC400464 | 0.434 | -0.4558 | <0.0001 |
| ALOX12P2  | 0.926 | -0.4557 | 0.0002  |
| PMP2      | 0.926 | -0.4554 | <0.0001 |
| GPR82     | 0.706 | -0.4553 | <0.0001 |
| LINC00619 | 0     | -0.4552 | <0.0001 |
| SIGLEC14  | 0.77  | -0.4546 | <0.0001 |

|          |       |         |         |
|----------|-------|---------|---------|
| CD86     | 0.937 | -0.4546 | <0.0001 |
| AGMO     | 0.803 | -0.4545 | 0.0015  |
| MACF1    | 0.937 | -0.4543 | <0.0001 |
| ERLIN2   | 0.806 | -0.4539 | <0.0001 |
| SETBP1   | 0.91  | -0.4539 | <0.0001 |
| ROPN1L   | 0.783 | -0.4536 | <0.0001 |
| CD53     | 0.896 | -0.4535 | <0.0001 |
| TVP23B   | 0.849 | -0.4534 | 0.0017  |
| C5       | 0.785 | -0.4531 | <0.0001 |
| CBLN2    | 0.838 | -0.4531 | <0.0001 |
| CD300C   | 0.882 | -0.4529 | <0.0001 |
| GOLGA6C  | 0.668 | -0.4526 | 0.0001  |
| NRN1     | 0.828 | -0.4526 | <0.0001 |
| PLSCR3   | 0.953 | -0.4525 | 0.0128  |
| BCL11B   | 0.907 | -0.4523 | <0.0001 |
| GPR171   | 0.919 | -0.4522 | <0.0001 |
| MCTP2    | 0.804 | -0.4519 | <0.0001 |
| CYB5R2   | 0.841 | -0.4518 | <0.0001 |
| CASP1    | 0.842 | -0.4516 | <0.0001 |
| DCAF5    | 0.931 | -0.4514 | 0.003   |
| TNFSF14  | 0.852 | -0.4513 | <0.0001 |
| WAS      | 0.888 | -0.451  | <0.0001 |
| SH3BP2   | 0.931 | -0.4509 | <0.0001 |
| ALB      | 0.919 | -0.4506 | <0.0001 |
| SH3BGRL2 | 0.712 | -0.4505 | <0.0001 |
| TMEM170A | 0.873 | -0.4504 | <0.0001 |
| RSPH10B  | 0.833 | -0.4503 | 0.0013  |
| SAA3P    | 0.875 | -0.4503 | <0.0001 |
| BCKDK    | 0.889 | -0.4499 | <0.0001 |
| CPTP     | 0.898 | -0.4498 | 0.0105  |
| ATG12P2  | 0     | -0.4497 | <0.0001 |
| TTY19    | 0.208 | -0.4493 | <0.0001 |
| RAD54L2  | 0.895 | -0.4493 | <0.0001 |

|             |       |         |         |
|-------------|-------|---------|---------|
| SLC25A42    | 0.805 | -0.4492 | <0.0001 |
| DAAM2       | 0.859 | -0.4492 | <0.0001 |
| KRT7        | 0.888 | -0.4492 | <0.0001 |
| GDF7        | 0.894 | -0.4492 | <0.0001 |
| WSB1        | 0.921 | -0.4492 | <0.0001 |
| CITED2      | 0.924 | -0.4492 | <0.0001 |
| TNS1        | 0.861 | -0.4491 | <0.0001 |
| BAAT        | 0.761 | -0.449  | <0.0001 |
| HOXB4       | 0.844 | -0.449  | <0.0001 |
| RET         | 0.925 | -0.4488 | <0.0001 |
| TANK        | 0.864 | -0.4487 | <0.0001 |
| C3          | 0.89  | -0.4487 | <0.0001 |
| ARID4A      | 0.893 | -0.4487 | <0.0001 |
| SULT1A4     | 0.94  | -0.4486 | 0.0247  |
| FCRL2       | 0.74  | -0.4486 | <0.0001 |
| NCKAP1L     | 0.885 | -0.4484 | <0.0001 |
| PIK3R4      | 0.792 | -0.4483 | <0.0001 |
| GRK5-IT1    | 0     | -0.448  | <0.0001 |
| ZBTB20-AS1  | 0.806 | -0.4479 | 0.0023  |
| ZNF32-AS1   | 0.569 | -0.4479 | 0.0089  |
| SNORD116-11 | 0.192 | -0.4479 | <0.0001 |
| SYBU        | 0.662 | -0.4479 | <0.0001 |
| TRIM35      | 0.739 | -0.4478 | <0.0001 |
| DNMBP       | 0.868 | -0.4478 | <0.0001 |
| ATAD3C      | 0.854 | -0.4477 | <0.0001 |
| PPIF        | 0.883 | -0.4477 | <0.0001 |
| MS4A1       | 0.815 | -0.4476 | <0.0001 |
| WDR86       | 0.863 | -0.4476 | <0.0001 |
| STARD13-IT1 | 0.332 | -0.4474 | <0.0001 |
| CHD1        | 0.876 | -0.4474 | <0.0001 |
| AMT         | 0.908 | -0.4473 | <0.0001 |
| MIR519E     | 0.169 | -0.4471 | <0.0001 |
| ACER2       | 0.831 | -0.4468 | <0.0001 |



|           |       |         |         |
|-----------|-------|---------|---------|
| PCYOX1    | 0.8   | -0.4467 | <0.0001 |
| RILPL2    | 0.877 | -0.4466 | 0.0001  |
| LOC574538 | 0.018 | -0.4465 | <0.0001 |
| WDFY4     | 0.857 | -0.4465 | <0.0001 |
| ZBTB4     | 0.719 | -0.4464 | <0.0001 |
| IL20RB    | 0.792 | -0.4464 | <0.0001 |
| ARMC5     | 0.807 | -0.4464 | <0.0001 |
| SAV1      | 0.731 | -0.4463 | <0.0001 |
| FXYD2     | 0.903 | -0.4462 | <0.0001 |
| NR2F1-AS1 | 0.742 | -0.4461 | 0.0021  |
| LINC00562 | 0     | -0.446  | <0.0001 |
| TMEM263   | 0.794 | -0.4459 | 0.0028  |
| CCNI      | 0.863 | -0.4459 | <0.0001 |
| ZKSCAN7   | 0.915 | -0.4458 | 0.01    |
| ARL2BPP7  | 0     | -0.4458 | <0.0001 |
| AADAC     | 0.872 | -0.4455 | <0.0001 |
| NFASC     | 0.89  | -0.4455 | <0.0001 |
| ABCG8     | 0.806 | -0.4454 | <0.0001 |
| SLC6A19   | 0.806 | -0.4453 | <0.0001 |
| MATK      | 0.852 | -0.4451 | <0.0001 |
| BEND3P3   | 0.525 | -0.4448 | 0.0164  |
| SIDT2     | 0.83  | -0.4448 | <0.0001 |
| POU2AF1   | 0.89  | -0.4447 | <0.0001 |
| RASL11A   | 0.857 | -0.4446 | <0.0001 |
| HERC3     | 0.905 | -0.4444 | <0.0001 |
| BEAN1     | 0.782 | -0.4443 | <0.0001 |
| PCA3      | 0.776 | -0.4442 | 0.0002  |
| USP12     | 0.851 | -0.4441 | <0.0001 |
| RSL24D1P8 | 0.473 | -0.444  | <0.0001 |
| MRPL46    | 0.811 | -0.4438 | <0.0001 |
| KDR       | 0.92  | -0.4438 | <0.0001 |
| MIR199A2  | 0.78  | -0.4437 | 0.0006  |
| GRAPL     | 0.77  | -0.4436 | <0.0001 |

|           |       |         |         |
|-----------|-------|---------|---------|
| SLC18A2   | 0.824 | -0.4435 | <0.0001 |
| TRAPPC6B  | 0.845 | -0.4434 | <0.0001 |
| RNF123    | 0.858 | -0.4434 | <0.0001 |
| JMJD1C    | 0.777 | -0.4433 | <0.0001 |
| TNFAIP8L2 | 0.927 | -0.4432 | 0.0003  |
| LOC388282 | 0     | -0.4429 | <0.0001 |
| FLT4      | 0.813 | -0.4428 | <0.0001 |
| MIR518C   | 0.027 | -0.4426 | 0.0083  |
| OSBPL9    | 0.742 | -0.4426 | <0.0001 |
| RBM26-AS1 | 0     | -0.4422 | <0.0001 |
| SLAMF7    | 0.856 | -0.4422 | <0.0001 |
| AFAP1L2   | 0.826 | -0.4421 | <0.0001 |
| LUC7L     | 0.886 | -0.4421 | <0.0001 |
| EEF1B2P5  | 0     | -0.4419 | <0.0001 |
| KLF12     | 0.781 | -0.4417 | <0.0001 |
| ELOVL6    | 0.663 | -0.4416 | <0.0001 |
| EPO       | 0.933 | -0.4416 | <0.0001 |
| YTHDF1P1  | 0.447 | -0.4415 | <0.0001 |
| PLA2G15   | 0.743 | -0.4414 | <0.0001 |
| AQP4      | 0.924 | -0.4414 | <0.0001 |
| ALAD      | 0.89  | -0.4413 | <0.0001 |
| FAM102A   | 0.638 | -0.4412 | <0.0001 |
| ECE1      | 0.923 | -0.4412 | <0.0001 |
| MIR1246   | 0.616 | -0.4409 | 0.0021  |
| ECHDC1    | 0.625 | -0.4409 | <0.0001 |
| STAT3     | 0.918 | -0.4409 | <0.0001 |
| RNU6-694P | 0     | -0.4407 | <0.0001 |
| CCND1     | 0.877 | -0.4407 | <0.0001 |
| HAS2      | 0.87  | -0.4403 | <0.0001 |
| OSBPL5    | 0.706 | -0.4402 | <0.0001 |
| GAPT      | 0.818 | -0.4402 | <0.0001 |
| SNORA20   | 0.773 | -0.4401 | <0.0001 |
| RNA5SP266 | 0.285 | -0.44   | 0.0004  |

|             |       |         |         |
|-------------|-------|---------|---------|
| GPLD1       | 0.872 | -0.44   | <0.0001 |
| INVS        | 0.857 | -0.4399 | <0.0001 |
| C19orf38    | 0.735 | -0.4395 | <0.0001 |
| MIR519D     | 0.538 | -0.4391 | 0.0204  |
| ITFG1       | 0.863 | -0.4391 | <0.0001 |
| PTP4A1      | 0.896 | -0.4391 | <0.0001 |
| LEMD1-AS1   | 0.865 | -0.4389 | 0.0137  |
| CASS4       | 0.822 | -0.4388 | <0.0001 |
| EXOSC6      | 0.881 | -0.4388 | <0.0001 |
| CFAP57      | 0.658 | -0.4387 | 0.0359  |
| FAM228A     | 0.622 | -0.4387 | <0.0001 |
| GUCD1       | 0.761 | -0.4385 | 0.0002  |
| CMC4        | 0.622 | -0.4385 | <0.0001 |
| RAB36       | 0.756 | -0.4385 | <0.0001 |
| H6PD        | 0.846 | -0.4384 | <0.0001 |
| CWH43       | 0.677 | -0.4383 | <0.0001 |
| SNORD116-27 | 0.043 | -0.4382 | <0.0001 |
| APOBEC3A    | 0.878 | -0.4382 | <0.0001 |
| LSMEM1      | 0.928 | -0.4381 | 0.0314  |
| GRAMD4      | 0.864 | -0.4381 | <0.0001 |
| SNORD119    | 0.527 | -0.438  | 0.0146  |
| MAL         | 0.829 | -0.438  | <0.0001 |
| NHLRC3      | 0.815 | -0.4378 | <0.0001 |
| MIR1227     | 0.848 | -0.4375 | 0.0102  |
| LNP1        | 0.848 | -0.4375 | <0.0001 |
| AQP12A      | 0.88  | -0.4374 | 0.0007  |
| C5AR1       | 0.895 | -0.4368 | <0.0001 |
| ACVR2A      | 0.912 | -0.4368 | <0.0001 |
| ECI1        | 0.665 | -0.4367 | <0.0001 |
| SLC22A3     | 0.881 | -0.4367 | <0.0001 |
| SNORD125    | 0.364 | -0.4366 | <0.0001 |
| AK4         | 0.45  | -0.4364 | <0.0001 |
| PFN1P3      | 0.349 | -0.4362 | <0.0001 |

|             |       |         |         |
|-------------|-------|---------|---------|
| NDUFAF1     | 0.79  | -0.4362 | <0.0001 |
| HIC1        | 0.874 | -0.436  | <0.0001 |
| RN7SKP151   | 0     | -0.4359 | <0.0001 |
| CD79A       | 0.801 | -0.4359 | <0.0001 |
| ERVFRD-1    | 0.862 | -0.4358 | 0.0031  |
| RNU6-863P   | 0     | -0.4357 | <0.0001 |
| COL4A3      | 0.866 | -0.4357 | <0.0001 |
| TPT1-AS1    | 0.874 | -0.4356 | 0.0125  |
| COQ4        | 0.898 | -0.4355 | <0.0001 |
| VPS13D      | 0.75  | -0.4353 | <0.0001 |
| MIR99AHG    | 0.463 | -0.4352 | <0.0001 |
| ZMAT1       | 0.875 | -0.4349 | <0.0001 |
| TEX29       | 0.866 | -0.4346 | 0.003   |
| PRKCH       | 0.89  | -0.4346 | <0.0001 |
| LINC00612   | 0.736 | -0.4345 | 0.0004  |
| HSPD1P9     | 0.353 | -0.4345 | <0.0001 |
| HNMT        | 0.849 | -0.4344 | <0.0001 |
| SMIM5       | 0.774 | -0.4342 | 0.0007  |
| RASAL3      | 0.757 | -0.4342 | <0.0001 |
| THEMIS      | 0.843 | -0.434  | 0.0003  |
| RSPH4A      | 0.844 | -0.434  | <0.0001 |
| ATP7B       | 0.844 | -0.4336 | <0.0001 |
| ERCC6L2     | 0.839 | -0.4335 | 0.002   |
| CACNA1C-AS1 | 0.552 | -0.4333 | 0.0106  |
| FAM41AY2    | 0.031 | -0.4326 | <0.0001 |
| MROH2A      | 0.752 | -0.4325 | 0.0002  |
| LILRA4      | 0.885 | -0.4325 | <0.0001 |
| MIR3167     | 0     | -0.4324 | 0.01    |
| MFSD14A     | 0     | -0.4324 | <0.0001 |
| SLC22A25    | 0.846 | -0.4323 | <0.0001 |
| CD96        | 0.883 | -0.4323 | <0.0001 |
| MTERF4      | 0.893 | -0.4322 | 0.0127  |
| EFEMP2      | 0.807 | -0.4321 | <0.0001 |

|             |       |         |         |
|-------------|-------|---------|---------|
| CYP2G1P     | 0.192 | -0.4318 | <0.0001 |
| UBASH3A     | 0.791 | -0.4312 | <0.0001 |
| RN7SKP159   | 0.245 | -0.4311 | 0.0063  |
| RGS7BP      | 0.784 | -0.4311 | <0.0001 |
| CCL3L3      | 0.736 | -0.4308 | <0.0001 |
| SS18L1      | 0.902 | -0.4308 | <0.0001 |
| SNORD116-20 | 0.547 | -0.4307 | 0.0496  |
| ERGIC1      | 0.669 | -0.4307 | <0.0001 |
| EPSTI1      | 0.841 | -0.4307 | <0.0001 |
| ERMN        | 0.723 | -0.4305 | <0.0001 |
| AKAP3       | 0.823 | -0.4305 | <0.0001 |
| RAPGEF5     | 0.785 | -0.4304 | <0.0001 |
| LINC00693   | 0.496 | -0.4303 | 0.0109  |
| GAB3        | 0.864 | -0.4302 | <0.0001 |
| MARC2       | 0.113 | -0.4299 | 0.0009  |
| PGM5P2      | 0.78  | -0.4297 | 0.0051  |
| IL18        | 0.904 | -0.4296 | <0.0001 |
| ZDHHC11B    | 0.908 | -0.4294 | 0.0459  |
| TTC7B       | 0.721 | -0.4293 | <0.0001 |
| HAR1A       | 0.758 | -0.4293 | <0.0001 |
| REL         | 0.899 | -0.4292 | <0.0001 |
| HBG2        | 0.737 | -0.4291 | <0.0001 |
| N4BP2       | 0.781 | -0.429  | <0.0001 |
| ST6GALNAC1  | 0.768 | -0.4289 | <0.0001 |
| MIR764      | 0.453 | -0.4287 | 0.0001  |
| IGLV5-37    | 0.357 | -0.4287 | <0.0001 |
| MAP7        | 0.907 | -0.4287 | <0.0001 |
| TTY23       | 0.638 | -0.4286 | 0.0097  |
| TGM2        | 0.862 | -0.4285 | <0.0001 |
| TMEM254-AS1 | 0.854 | -0.4283 | 0.0132  |
| FCRL1       | 0.802 | -0.4282 | <0.0001 |
| SH3RF1      | 0.632 | -0.4281 | <0.0001 |
| TMEM254     | 0.862 | -0.4279 | 0.0018  |

|             |       |         |         |
|-------------|-------|---------|---------|
| MIR577      | 0.088 | -0.4278 | 0.0001  |
| LOC400743   | 0.73  | -0.4278 | 0.0196  |
| PCDH7       | 0.64  | -0.4278 | <0.0001 |
| NEU4        | 0.844 | -0.4276 | <0.0001 |
| MIR3160-2   | 0     | -0.4274 | 0.0106  |
| B4GALT1     | 0.856 | -0.427  | <0.0001 |
| CFHR1       | 0.749 | -0.4268 | <0.0001 |
| CD300E      | 0.828 | -0.4265 | <0.0001 |
| LIN7C       | 0.877 | -0.4265 | <0.0001 |
| CDHR1       | 0.872 | -0.4262 | 0.0001  |
| PIP4K2A     | 0.832 | -0.4262 | <0.0001 |
| GALNS       | 0.882 | -0.4261 | <0.0001 |
| UPP2        | 0.795 | -0.426  | <0.0001 |
| PCDH19      | 0.768 | -0.4258 | <0.0001 |
| CACNA1C-AS2 | 0     | -0.4256 | <0.0001 |
| TRAF3IP3    | 0.886 | -0.4255 | <0.0001 |
| TOGARAM2    | 0     | -0.4254 | <0.0001 |
| CCDC158     | 0.665 | -0.4253 | <0.0001 |
| ARRDC5      | 0.71  | -0.4253 | <0.0001 |
| SLC47A1     | 0.724 | -0.425  | <0.0001 |
| KLHL6-AS1   | 0     | -0.4249 | <0.0001 |
| SH3D19      | 0.763 | -0.4249 | <0.0001 |
| PITPNA      | 0.92  | -0.4247 | 0.0001  |
| RCVRN       | 0.943 | -0.4246 | 0.0006  |
| ZNF69       | 0.681 | -0.4246 | <0.0001 |
| FRMD4A      | 0.866 | -0.4244 | <0.0001 |
| CWC25       | 0.921 | -0.4242 | 0.0044  |
| DNAJC16     | 0.862 | -0.4242 | <0.0001 |
| DNAJC22     | 0.805 | -0.4241 | <0.0001 |
| AKTIP       | 0.81  | -0.4241 | <0.0001 |
| PARP8       | 0.721 | -0.4239 | <0.0001 |
| DGCR6L      | 0.867 | -0.4237 | <0.0001 |
| ZBTB48      | 0.919 | -0.4236 | <0.0001 |

|           |       |         |         |
|-----------|-------|---------|---------|
| MIR4780   | 0.417 | -0.4234 | 0.0119  |
| AMIGO2    | 0.862 | -0.4234 | <0.0001 |
| TH        | 0.953 | -0.4233 | 0.0019  |
| SLC25A28  | 0.764 | -0.4233 | <0.0001 |
| RAC2      | 0.872 | -0.4233 | <0.0001 |
| BTBD6     | 0.672 | -0.4232 | <0.0001 |
| AMY2A     | 0.86  | -0.423  | 0.0005  |
| CTC1      | 0.928 | -0.423  | 0.0106  |
| SLC34A2   | 0.714 | -0.423  | <0.0001 |
| IGKV2D-40 | 0.597 | -0.4229 | 0.0031  |
| PKNOX2    | 0.725 | -0.4227 | <0.0001 |
| COX6A2    | 0.852 | -0.4226 | <0.0001 |
| FCER1G    | 0.909 | -0.4225 | <0.0001 |
| TEX44     | 0     | -0.4222 | <0.0001 |
| ZC3H14    | 0.932 | -0.422  | 0.0003  |
| BCORP1    | 0.605 | -0.422  | <0.0001 |
| C16orf46  | 0.937 | -0.4219 | 0.0009  |
| COL4A3BP  | 0.747 | -0.4218 | <0.0001 |
| COPZ2     | 0.762 | -0.4218 | <0.0001 |
| BMP1      | 0.933 | -0.4216 | 0.0001  |
| MIR223    | 0.674 | -0.4216 | 0.0014  |
| MIR3659   | 0.499 | -0.4216 | 0.0124  |
| KLF10     | 0.92  | -0.4214 | <0.0001 |
| C16orf87  | 0.589 | -0.4212 | <0.0001 |
| SNORA70F  | 0.645 | -0.4207 | 0.0073  |
| NCF1C     | 0.891 | -0.4206 | 0.0311  |
| TSKU      | 0.747 | -0.4205 | <0.0001 |
| RUNX1T1   | 0.858 | -0.4205 | <0.0001 |
| SNORD14D  | 0     | -0.4204 | <0.0001 |
| CD1E      | 0.922 | -0.4203 | <0.0001 |
| IFNLR1    | 0.912 | -0.4201 | 0.0243  |
| FAM85B    | 0.14  | -0.4201 | <0.0001 |
| CHIC1     | 0.66  | -0.4201 | <0.0001 |

|           |       |         |         |
|-----------|-------|---------|---------|
| LIPN      | 0.551 | -0.42   | <0.0001 |
| GZMB      | 0.835 | -0.42   | <0.0001 |
| SCARNA9   | 0.88  | -0.4199 | 0.0266  |
| LINC00642 | 0.892 | -0.4199 | 0.0338  |
| TRGV7     | 0.639 | -0.4198 | 0.0001  |
| YTHDC1    | 0.825 | -0.4197 | <0.0001 |
| RRN3P2    | 0.899 | -0.4195 | 0.0154  |
| CRYAA     | 0.897 | -0.4195 | <0.0001 |
| MAFF      | 0.925 | -0.4195 | <0.0001 |
| PPP1R16B  | 0.831 | -0.4194 | <0.0001 |
| AK3P2     | 0     | -0.4193 | <0.0001 |
| NEIL2     | 0.858 | -0.4193 | <0.0001 |
| MAP4K1    | 0.873 | -0.4193 | <0.0001 |
| OR52V1P   | 0     | -0.4189 | <0.0001 |
| IKZF2     | 0.724 | -0.4188 | <0.0001 |
| CNTFR-AS1 | 0.846 | -0.4187 | 0.0131  |
| FAM221A   | 0.76  | -0.4185 | 0.0003  |
| FGF12-AS1 | 0     | -0.4184 | 0.0122  |
| LINC00092 | 0.841 | -0.4184 | 0.0127  |
| GCSAM     | 0.81  | -0.4182 | 0.001   |
| HIVEP1    | 0.927 | -0.418  | <0.0001 |
| USP6NL    | 0.656 | -0.4179 | <0.0001 |
| CTSG      | 0.814 | -0.4178 | <0.0001 |
| DLEC1     | 0.931 | -0.4177 | <0.0001 |
| HCG23     | 0.208 | -0.4176 | 0.0001  |
| ADGRE3    | 0.516 | -0.4176 | 0.0335  |
| MRPS31    | 0.729 | -0.4176 | <0.0001 |
| SELENBP1  | 0.885 | -0.4175 | <0.0001 |
| MUC22     | 0.075 | -0.4173 | <0.0001 |
| MIR451B   | 0     | -0.4171 | 0.0125  |
| NKAPL     | 0.64  | -0.4165 | <0.0001 |
| MLIP      | 0.202 | -0.4164 | <0.0001 |
| SH3BGRL   | 0.893 | -0.4162 | <0.0001 |



|              |       |         |         |
|--------------|-------|---------|---------|
| AKT1         | 0.901 | -0.4161 | <0.0001 |
| FPGS         | 0.938 | -0.4158 | 0.0002  |
| C16orf86     | 0.679 | -0.4158 | <0.0001 |
| RNA5SP315    | 0     | -0.4155 | 0.013   |
| DDAH1        | 0.664 | -0.4155 | <0.0001 |
| CNOT6L       | 0.793 | -0.4155 | <0.0001 |
| CRBN         | 0.898 | -0.4155 | <0.0001 |
| LINC00574    | 0.874 | -0.4152 | 0.0077  |
| LOC283140    | 0.095 | -0.4152 | 0.0401  |
| MXRA8        | 0.672 | -0.4151 | <0.0001 |
| CCDC88C      | 0.822 | -0.415  | <0.0001 |
| KIR2DL2      | 0.718 | -0.4149 | <0.0001 |
| NFATC3       | 0.911 | -0.4149 | <0.0001 |
| AMN          | 0.755 | -0.4147 | <0.0001 |
| GYG2         | 0.9   | -0.4144 | <0.0001 |
| AHI1         | 0.893 | -0.4143 | <0.0001 |
| LAX1         | 0.784 | -0.414  | <0.0001 |
| CTF1         | 0.871 | -0.4139 | <0.0001 |
| MIR3689D2    | 0     | -0.4138 | 0.0133  |
| MIR4776-1    | 0     | -0.4138 | 0.0134  |
| SASH1        | 0.729 | -0.4137 | <0.0001 |
| FLJ42969     | 0     | -0.4135 | 0.0016  |
| KCND3-AS1    | 0     | -0.4135 | <0.0001 |
| LOC100129046 | 0     | -0.4133 | 0.0057  |
| MIR129-2     | 0.857 | -0.4133 | 0.0067  |
| APOA4        | 0.773 | -0.4133 | <0.0001 |
| MIR1245A     | 0.32  | -0.4132 | 0.0003  |
| AP1G1        | 0.916 | -0.413  | <0.0001 |
| ITPKB-IT1    | 0.766 | -0.4129 | 0.005   |
| TBX21        | 0.838 | -0.4128 | <0.0001 |
| ZFAND5       | 0.732 | -0.4126 | <0.0001 |
| TMEM159      | 0.744 | -0.4126 | <0.0001 |
| NFE2         | 0.925 | -0.4124 | 0.0002  |

|             |       |         |         |
|-------------|-------|---------|---------|
| SHROOM3     | 0.66  | -0.4123 | <0.0001 |
| DDR2        | 0.899 | -0.4121 | <0.0001 |
| LINC01586   | 0     | -0.4114 | <0.0001 |
| PHACTR2     | 0.913 | -0.4113 | <0.0001 |
| KIF13B      | 0.797 | -0.4112 | <0.0001 |
| LMBRD1      | 0.822 | -0.4112 | <0.0001 |
| SPATA46     | 0     | -0.4111 | <0.0001 |
| L3MBTL3     | 0.809 | -0.4111 | <0.0001 |
| PRCD        | 0.822 | -0.4111 | <0.0001 |
| POU6F2      | 0.855 | -0.4111 | <0.0001 |
| TRGV3       | 0.079 | -0.411  | <0.0001 |
| ND4         | 0.859 | -0.4109 | 0.0462  |
| HBG1        | 0.737 | -0.4109 | <0.0001 |
| SMIM1       | 0.596 | -0.4107 | 0.0001  |
| SNORD105    | 0.643 | -0.4103 | 0.0015  |
| FAM74A3     | 0.65  | -0.41   | 0.0019  |
| RCAN2       | 0.681 | -0.41   | <0.0001 |
| TLR8        | 0.79  | -0.41   | <0.0001 |
| HSH2D       | 0.804 | -0.41   | <0.0001 |
| TPSAB1      | 0.664 | -0.4099 | <0.0001 |
| MRPS6       | 0.834 | -0.4099 | <0.0001 |
| PTGS1       | 0.878 | -0.4099 | <0.0001 |
| ACE2        | 0.828 | -0.4097 | <0.0001 |
| METRNL      | 0.834 | -0.4095 | <0.0001 |
| SLC24A3     | 0.834 | -0.4094 | <0.0001 |
| CEACAM3     | 0.887 | -0.4094 | <0.0001 |
| MIR607      | 0     | -0.4093 | 0.0004  |
| GJB3        | 0.805 | -0.4093 | <0.0001 |
| ACOT13      | 0.846 | -0.4093 | <0.0001 |
| SNORD107    | 0.216 | -0.4092 | <0.0001 |
| INSIG2      | 0.753 | -0.409  | <0.0001 |
| ANKRD20A11P | 0.754 | -0.4088 | 0.0009  |
| PLEK2       | 0.605 | -0.4088 | <0.0001 |

|            |       |         |         |
|------------|-------|---------|---------|
| CX3CR1     | 0.875 | -0.4088 | <0.0001 |
| MIRLET7E   | 0.52  | -0.4086 | 0.0066  |
| PNPLA3     | 0.889 | -0.4085 | <0.0001 |
| P2RY1      | 0.705 | -0.4084 | <0.0001 |
| UBXN10     | 0.763 | -0.4084 | <0.0001 |
| UQCRC2     | 0.891 | -0.4083 | <0.0001 |
| NCRUPAR    | 0     | -0.4082 | 0.0085  |
| SNX18P9    | 0.414 | -0.4082 | <0.0001 |
| RNF212     | 0.778 | -0.408  | <0.0001 |
| NXF1       | 0.915 | -0.4079 | 0.0001  |
| XXYLT1-AS2 | 0     | -0.4079 | <0.0001 |
| SERPINC1   | 0.879 | -0.4075 | <0.0001 |
| ROPN1B     | 0.87  | -0.4074 | <0.0001 |
| FIGN       | 0.901 | -0.4074 | <0.0001 |
| OR1D4      | 0.581 | -0.4073 | <0.0001 |
| LRRC7      | 0.833 | -0.4073 | <0.0001 |
| UBE2L6     | 0.882 | -0.4072 | <0.0001 |
| CDK10      | 0.926 | -0.4071 | 0.0001  |
| NOXO1      | 0.728 | -0.4071 | <0.0001 |
| KALRN      | 0.658 | -0.407  | <0.0001 |
| RNA5SP475  | 0.074 | -0.4067 | 0.0011  |
| CLIC2      | 0.892 | -0.4065 | <0.0001 |
| RAG1       | 0.894 | -0.4065 | <0.0001 |
| NHEG1      | 0     | -0.4063 | <0.0001 |
| GPR183     | 0.84  | -0.4063 | <0.0001 |
| GOLGA6B    | 0.848 | -0.4062 | 0.0008  |
| NEGR1      | 0.812 | -0.4062 | <0.0001 |
| SPI1       | 0.887 | -0.4062 | <0.0001 |
| MIR99A     | 0.222 | -0.4059 | <0.0001 |
| FAM153B    | 0.722 | -0.4057 | <0.0001 |
| DSG1       | 0.914 | -0.4057 | <0.0001 |
| MIR3974    | 0     | -0.4056 | 0.0151  |
| ZNF511     | 0.879 | -0.4055 | <0.0001 |

|              |       |         |         |
|--------------|-------|---------|---------|
| HBD          | 0.931 | -0.4052 | 0.0002  |
| EDN2         | 0.891 | -0.4052 | <0.0001 |
| ZNF471       | 0.87  | -0.4051 | <0.0001 |
| HMOX2        | 0.894 | -0.4049 | <0.0001 |
| NAP1L3       | 0.916 | -0.4049 | <0.0001 |
| MMP21        | 0.867 | -0.4048 | <0.0001 |
| MIR23B       | 0.862 | -0.4047 | 0.0058  |
| CMTM5        | 0.867 | -0.4047 | <0.0001 |
| PPA2         | 0.619 | -0.4046 | <0.0001 |
| PER2         | 0.789 | -0.4043 | <0.0001 |
| GATA5        | 0.83  | -0.404  | <0.0001 |
| ITGB8        | 0.935 | -0.4037 | 0.0003  |
| ZNF341-AS1   | 0.471 | -0.4037 | <0.0001 |
| LOC100508046 | 0     | -0.4036 | 0.0064  |
| HERC6        | 0.703 | -0.4036 | <0.0001 |
| ZNF688       | 0.751 | -0.4034 | <0.0001 |
| S100A9       | 0.87  | -0.4034 | <0.0001 |
| CALM1        | 0.889 | -0.4032 | <0.0001 |
| BTK          | 0.915 | -0.403  | <0.0001 |
| CPOX         | 0.926 | -0.4029 | 0.0002  |
| PCDH9-AS1    | 0.061 | -0.4029 | 0.0065  |
| SMAD1-AS2    | 0.665 | -0.4024 | 0.0016  |
| KDM5C-IT1    | 0     | -0.4021 | <0.0001 |
| TNFRSF13B    | 0.871 | -0.402  | <0.0001 |
| EML1         | 0.902 | -0.402  | <0.0001 |
| BHLHA9       | 0.409 | -0.4017 | <0.0001 |
| COX14        | 0.823 | -0.4015 | 0.0027  |
| POM121L1P    | 0.506 | -0.4014 | 0.0002  |
| KCNJ13       | 0.661 | -0.4012 | <0.0001 |
| CREB3L3      | 0.822 | -0.4012 | <0.0001 |
| PRAMEF22     | 0.287 | -0.4011 | <0.0001 |
| MIR133A1HG   | 0.772 | -0.4008 | 0.002   |
| UAP1         | 0.881 | -0.4008 | <0.0001 |

|             |       |         |         |
|-------------|-------|---------|---------|
| PACRG       | 0.767 | -0.4006 | <0.0001 |
| WDR7        | 0.671 | -0.4005 | <0.0001 |
| IFIT1       | 0.879 | -0.4002 | <0.0001 |
| MYC         | 0.897 | -0.4001 | <0.0001 |
| ANKRD44-IT1 | 0.854 | -0.4    | 0.0275  |
| PWRN2       | 0.337 | -0.4    | <0.0001 |
| CLEC4E      | 0.664 | -0.4    | <0.0001 |
| RSL24D1P11  | 0.041 | -0.3999 | <0.0001 |
| MAP3K5      | 0.855 | -0.3998 | <0.0001 |
| NFE2L2      | 0.915 | -0.3994 | 0.0001  |
| LOC389765   | 0.328 | -0.3994 | <0.0001 |
| HNRNPDL     | 0.929 | -0.3993 | 0.036   |
| ENTPD5      | 0.84  | -0.3993 | <0.0001 |
| PAXBP1      | 0.939 | -0.3992 | 0.0469  |
| FAM224B     | 0     | -0.3992 | <0.0001 |
| AOC4P       | 0.895 | -0.3991 | 0.0401  |
| TMEM184A    | 0.845 | -0.3991 | <0.0001 |
| DLG4        | 0.936 | -0.399  | 0.0003  |
| FGF14-IT1   | 0.853 | -0.399  | 0.0264  |
| PARP9       | 0.649 | -0.399  | <0.0001 |
| ACOX3       | 0.787 | -0.399  | <0.0001 |
| HSDL2       | 0.802 | -0.399  | <0.0001 |
| STARD13     | 0.75  | -0.3989 | <0.0001 |
| SLC17A9     | 0.897 | -0.3988 | 0.0006  |
| PARP3       | 0.875 | -0.3988 | <0.0001 |
| LINC00487   | 0.528 | -0.3987 | <0.0001 |
| SNAI1       | 0.879 | -0.3986 | <0.0001 |
| CTBP2       | 0.843 | -0.3985 | <0.0001 |
| MXI1        | 0.918 | -0.3981 | 0.0001  |
| SLC44A2     | 0.872 | -0.3981 | <0.0001 |
| ADGRG4      | 0     | -0.398  | <0.0001 |
| WDR59       | 0.891 | -0.3979 | <0.0001 |
| KLK10       | 0.887 | -0.3978 | <0.0001 |

|              |       |         |         |
|--------------|-------|---------|---------|
| RGPD5        | 0.83  | -0.3977 | 0.001   |
| ESD          | 0.647 | -0.3977 | <0.0001 |
| IKZF3        | 0.814 | -0.3977 | <0.0001 |
| SORCS2       | 0.743 | -0.3976 | <0.0001 |
| PAN2         | 0.918 | -0.3975 | 0.0014  |
| FLVCR2       | 0.647 | -0.3975 | <0.0001 |
| UNC5C        | 0.9   | -0.3975 | <0.0001 |
| LRP5L        | 0.907 | -0.3974 | <0.0001 |
| RN7SL868P    | 0     | -0.3972 | <0.0001 |
| GABBR1       | 0.918 | -0.3972 | <0.0001 |
| CDKN1C       | 0.867 | -0.3971 | <0.0001 |
| GPR174       | 0.699 | -0.397  | <0.0001 |
| GDPD4        | 0.846 | -0.397  | <0.0001 |
| LOC101928651 | 0     | -0.3967 | <0.0001 |
| CPO          | 0.891 | -0.3967 | <0.0001 |
| SLFN12L      | 0.705 | -0.3966 | <0.0001 |
| MIR1237      | 0.585 | -0.3965 | 0.0001  |
| FSD1         | 0.826 | -0.3965 | <0.0001 |
| CRADD        | 0.897 | -0.3965 | <0.0001 |
| PROSER2      | 0.671 | -0.3964 | 0.0001  |
| LOC389906    | 0.676 | -0.3963 | <0.0001 |
| GP1BA        | 0.916 | -0.3963 | <0.0001 |
| FLRT3        | 0.788 | -0.3961 | <0.0001 |
| EVC          | 0.881 | -0.396  | <0.0001 |
| SOD1         | 0.917 | -0.3959 | 0.0002  |
| LOC400499    | 0.638 | -0.3959 | 0.0085  |
| LOC643441    | 0.164 | -0.3959 | <0.0001 |
| CCDC151      | 0.831 | -0.3959 | <0.0001 |
| SERPINE1     | 0.895 | -0.3959 | <0.0001 |
| MICALL2      | 0.838 | -0.3958 | <0.0001 |
| CPZ          | 0.878 | -0.3957 | <0.0001 |
| BEX4         | 0.909 | -0.3956 | <0.0001 |
| FLJ22447     | 0.343 | -0.3955 | <0.0001 |

|              |       |         |         |
|--------------|-------|---------|---------|
| PLA2G4A      | 0.874 | -0.3955 | <0.0001 |
| SP110        | 0.814 | -0.3951 | <0.0001 |
| ADARB1       | 0.906 | -0.3951 | <0.0001 |
| INPP5D       | 0.868 | -0.395  | <0.0001 |
| TGFB3        | 0.898 | -0.395  | <0.0001 |
| OR7E130P     | 0     | -0.3949 | <0.0001 |
| RPL34-AS1    | 0.299 | -0.3947 | <0.0001 |
| PI16         | 0.692 | -0.3947 | <0.0001 |
| ETHE1        | 0.848 | -0.3947 | <0.0001 |
| LINC00526    | 0.53  | -0.3946 | <0.0001 |
| AHDC1        | 0.901 | -0.3946 | <0.0001 |
| RPL21P44     | 0.676 | -0.3945 | 0.0037  |
| LOC100286922 | 0.724 | -0.3945 | 0.0422  |
| ANKRD20A9P   | 0.367 | -0.3943 | <0.0001 |
| UBE2E2       | 0.683 | -0.3943 | <0.0001 |
| UFSP2        | 0.759 | -0.3942 | <0.0001 |
| TST          | 0.86  | -0.3942 | <0.0001 |
| LOC728989    | 0.838 | -0.394  | 0.0142  |
| SNORA35      | 0.64  | -0.3936 | 0.0002  |
| DENND1C      | 0.867 | -0.3936 | <0.0001 |
| ZNF18        | 0.821 | -0.3935 | <0.0001 |
| MTO1         | 0.787 | -0.3933 | <0.0001 |
| SPN          | 0.909 | -0.3933 | <0.0001 |
| BNC1         | 0.717 | -0.3932 | <0.0001 |
| CCM2         | 0.799 | -0.3932 | <0.0001 |
| MMP7         | 0.905 | -0.3932 | <0.0001 |
| SETD3        | 0.825 | -0.3931 | <0.0001 |
| HSCB         | 0.834 | -0.3931 | <0.0001 |
| ZBED1        | 0.934 | -0.393  | 0.0009  |
| FAM25C       | 0.731 | -0.3928 | 0.0002  |
| TTY18        | 0.708 | -0.3928 | 0.0055  |
| SEMA4D       | 0.87  | -0.3928 | <0.0001 |
| SNX25        | 0.716 | -0.3927 | <0.0001 |

|              |       |         |         |
|--------------|-------|---------|---------|
| LOC100128006 | 0     | -0.3925 | 0.0036  |
| RNU6-53P     | 0.257 | -0.3925 | <0.0001 |
| MIR548A2     | 0     | -0.3922 | 0.0006  |
| FAM74A4      | 0.849 | -0.3921 | 0.0075  |
| SCN3A        | 0.656 | -0.3921 | <0.0001 |
| LOC646938    | 0.86  | -0.392  | 0.0113  |
| SIDT1-AS1    | 0     | -0.392  | <0.0001 |
| STARD13-AS   | 0.801 | -0.3919 | 0.032   |
| HSD17B8      | 0.888 | -0.3919 | <0.0001 |
| SLC27A6      | 0.821 | -0.3918 | <0.0001 |
| PLA1A        | 0.689 | -0.3915 | <0.0001 |
| RNY4P30      | 0     | -0.3913 | 0.0016  |
| TCF7L2       | 0.897 | -0.3913 | <0.0001 |
| ZDHHC8       | 0.892 | -0.3911 | 0.0001  |
| SLC39A12     | 0.77  | -0.391  | <0.0001 |
| SCNN1D       | 0.894 | -0.391  | <0.0001 |
| MPRIP-AS1    | 0.357 | -0.3908 | <0.0001 |
| S1PR1        | 0.839 | -0.3907 | <0.0001 |
| MIR503       | 0.801 | -0.3906 | 0.028   |
| KCTD12       | 0.9   | -0.3906 | <0.0001 |
| MIR371B      | 0     | -0.3903 | 0.0196  |
| ADM          | 0.898 | -0.3902 | <0.0001 |
| FUCA1        | 0.935 | -0.3901 | 0.0005  |
| SGCB         | 0.749 | -0.39   | <0.0001 |
| ARHGEF10     | 0.848 | -0.39   | <0.0001 |
| PEX14        | 0.904 | -0.3898 | <0.0001 |
| EMB          | 0.678 | -0.3894 | <0.0001 |
| KRT126P      | 0.254 | -0.3893 | <0.0001 |
| XRN1         | 0.882 | -0.3893 | <0.0001 |
| LOC101928323 | 0     | -0.3892 | <0.0001 |
| SNORA54      | 0.869 | -0.3888 | 0.0277  |
| CYCSP34      | 0.331 | -0.3888 | <0.0001 |
| KRCC1        | 0.566 | -0.388  | <0.0001 |



|              |       |         |         |
|--------------|-------|---------|---------|
| THNSL1       | 0.719 | -0.3879 | <0.0001 |
| FAM25A       | 0.753 | -0.3878 | <0.0001 |
| LOC101929662 | 0     | -0.3877 | <0.0001 |
| C10orf105    | 0.737 | -0.3877 | <0.0001 |
| OCIAD2       | 0.721 | -0.3875 | <0.0001 |
| ISOC2        | 0.815 | -0.3875 | <0.0001 |
| CLECL1       | 0.843 | -0.3874 | <0.0001 |
| CADM3        | 0.878 | -0.3874 | <0.0001 |
| ENDOG        | 0.848 | -0.3873 | <0.0001 |
| MMAB         | 0.439 | -0.3871 | <0.0001 |
| ZBTB43       | 0.894 | -0.3871 | <0.0001 |
| PCSK2        | 0.938 | -0.387  | 0.0017  |
| LINC00596    | 0.655 | -0.387  | 0.0105  |
| MIR3074      | 0     | -0.3868 | 0.0174  |
| RN7SL748P    | 0     | -0.3867 | <0.0001 |
| RANBP6       | 0.777 | -0.3867 | <0.0001 |
| DHX32        | 0.762 | -0.3866 | <0.0001 |
| MACC1        | 0.809 | -0.3865 | <0.0001 |
| ZNF276       | 0.902 | -0.3864 | 0.0001  |
| PNISR        | 0.927 | -0.3863 | 0.0178  |
| MIR3675      | 0     | -0.3862 | 0.0212  |
| GSTA3        | 0.889 | -0.3862 | <0.0001 |
| TSEN15P2     | 0     | -0.3858 | <0.0001 |
| LOC100507395 | 0.368 | -0.3858 | <0.0001 |
| TCEAL3       | 0.82  | -0.3858 | <0.0001 |
| C8orf58      | 0.874 | -0.3858 | <0.0001 |
| NPR1         | 0.914 | -0.3856 | 0.0002  |
| MIR1260B     | 0     | -0.3854 | 0.0089  |
| ALOX5        | 0.818 | -0.3854 | <0.0001 |
| ZNRF2P2      | 0     | -0.3852 | <0.0001 |
| CLEC11A      | 0.888 | -0.3851 | <0.0001 |
| MS4A4A       | 0.924 | -0.385  | 0.0004  |
| ZBP1         | 0.705 | -0.3849 | <0.0001 |

|            |       |         |         |
|------------|-------|---------|---------|
| CEACAM4    | 0.915 | -0.3849 | <0.0001 |
| OAS1       | 0.859 | -0.3844 | <0.0001 |
| CDKN1A     | 0.884 | -0.3844 | <0.0001 |
| LAT        | 0.945 | -0.3843 | 0.0025  |
| RPL26P9    | 0     | -0.3841 | <0.0001 |
| KLRC2      | 0.547 | -0.384  | <0.0001 |
| FAM43B     | 0.865 | -0.3838 | <0.0001 |
| CLDN8      | 0.602 | -0.3837 | <0.0001 |
| TEX21P     | 0.6   | -0.3835 | 0.0334  |
| TET2       | 0.89  | -0.3834 | 0.0009  |
| APBB1IP    | 0.782 | -0.3832 | <0.0001 |
| LOC442497  | 0.298 | -0.3831 | 0.0064  |
| SEC14L3    | 0.794 | -0.3831 | <0.0001 |
| RNF223     | 0.566 | -0.383  | 0.0084  |
| GSTM2P1    | 0.704 | -0.3829 | 0.0017  |
| GNG11      | 0.903 | -0.3829 | <0.0001 |
| GBP4       | 0.824 | -0.3825 | <0.0001 |
| CAMTA2     | 0.9   | -0.3824 | <0.0001 |
| MGST2      | 0.904 | -0.3824 | <0.0001 |
| TXNIP      | 0.907 | -0.3822 | 0.0002  |
| SUPT20HL1  | 0     | -0.3822 | <0.0001 |
| PHKA1P1    | 0     | -0.382  | <0.0001 |
| KLF7       | 0.862 | -0.382  | <0.0001 |
| METRN      | 0.777 | -0.3819 | <0.0001 |
| EVL        | 0.884 | -0.3819 | <0.0001 |
| CRAT       | 0.912 | -0.3818 | <0.0001 |
| KCTD21-AS1 | 0.112 | -0.3816 | <0.0001 |
| ACTR3C     | 0.858 | -0.3814 | 0.0006  |
| CASP4      | 0.943 | -0.3808 | 0.0011  |
| POU2F2     | 0.838 | -0.3808 | <0.0001 |
| MBD4       | 0.838 | -0.3808 | <0.0001 |
| C19orf71   | 0.774 | -0.3807 | <0.0001 |
| ADAP1      | 0.809 | -0.3807 | <0.0001 |

|              |       |         |         |
|--------------|-------|---------|---------|
| CD3E         | 0.896 | -0.3805 | <0.0001 |
| LINC00311    | 0.774 | -0.3804 | 0.0016  |
| B3GNT7       | 0.815 | -0.3804 | <0.0001 |
| KANK1        | 0.858 | -0.3804 | <0.0001 |
| ABHD5        | 0.868 | -0.3803 | <0.0001 |
| UNQ6494      | 0.447 | -0.3801 | 0.0001  |
| ASB10        | 0.887 | -0.3801 | <0.0001 |
| FAM20C       | 0.777 | -0.3799 | <0.0001 |
| MIA2         | 0.874 | -0.3799 | <0.0001 |
| GGTLC2       | 0.764 | -0.3798 | <0.0001 |
| PHACTR2-AS1  | 0     | -0.3797 | <0.0001 |
| CMTM2        | 0.797 | -0.3797 | <0.0001 |
| SMPDL3A      | 0.853 | -0.3797 | <0.0001 |
| GYPC         | 0.912 | -0.3797 | <0.0001 |
| MIR202       | 0.734 | -0.3796 | 0.0107  |
| LRRC29       | 0.768 | -0.3796 | <0.0001 |
| ADCY10       | 0.655 | -0.3794 | <0.0001 |
| EBPL         | 0.795 | -0.3791 | <0.0001 |
| NRAP         | 0.878 | -0.3789 | <0.0001 |
| LINC00391    | 0.563 | -0.3788 | 0.0353  |
| EGFR         | 0.849 | -0.3788 | <0.0001 |
| RN7SL551P    | 0     | -0.3784 | <0.0001 |
| KLHL8        | 0.824 | -0.3783 | <0.0001 |
| MIR300       | 0.341 | -0.378  | <0.0001 |
| LOC100130950 | 0.601 | -0.3779 | 0.0021  |
| AKAP11       | 0.792 | -0.3779 | <0.0001 |
| LINC01378    | 0.485 | -0.3778 | <0.0001 |
| KIR3DL3      | 0.703 | -0.3778 | <0.0001 |
| PTGER4       | 0.903 | -0.3777 | 0.0001  |
| MIR1178      | 0.143 | -0.3777 | <0.0001 |
| LOC100130701 | 0     | -0.3776 | 0.0083  |
| COX1         | 0.723 | -0.3776 | 0.0293  |
| SLC39A2      | 0.878 | -0.3776 | <0.0001 |

|              |       |         |         |
|--------------|-------|---------|---------|
| SNORD82      | 0.467 | -0.3775 | 0.0011  |
| ARSF         | 0.756 | -0.3774 | <0.0001 |
| CAPS2        | 0.809 | -0.3772 | <0.0001 |
| IL6          | 0.881 | -0.3772 | <0.0001 |
| SNORD50B     | 0.454 | -0.3771 | 0.0002  |
| LINC00865    | 0.483 | -0.3771 | <0.0001 |
| FOXA3        | 0.663 | -0.3771 | <0.0001 |
| LOC100130849 | 0.408 | -0.377  | 0.0008  |
| SLC4A10      | 0.836 | -0.377  | <0.0001 |
| TNFRSF10C    | 0.895 | -0.3767 | 0.0002  |
| TRPC2        | 0.816 | -0.3767 | <0.0001 |
| CRP          | 0.866 | -0.3766 | <0.0001 |
| CARD11       | 0.723 | -0.3765 | <0.0001 |
| B3GALT5      | 0.789 | -0.3764 | <0.0001 |
| MIR346       | 0.693 | -0.3763 | 0.0203  |
| SPRY4        | 0.745 | -0.3763 | <0.0001 |
| MCCC2        | 0.898 | -0.3763 | <0.0001 |
| CACNA1H      | 0.864 | -0.3762 | <0.0001 |
| CAMP         | 0.891 | -0.376  | <0.0001 |
| HECTD3       | 0.907 | -0.376  | <0.0001 |
| OR10J2P      | 0     | -0.3759 | <0.0001 |
| RSAD2        | 0.876 | -0.3758 | <0.0001 |
| COL18A1-AS2  | 0     | -0.3757 | <0.0001 |
| MYCBP2-AS2   | 0.486 | -0.3756 | <0.0001 |
| HCST         | 0.928 | -0.3754 | 0.0011  |
| GHITM        | 0.67  | -0.3754 | <0.0001 |
| ALDH1L1      | 0.909 | -0.3753 | <0.0001 |
| MIR4688      | 0     | -0.3752 | <0.0001 |
| RWDD4        | 0.748 | -0.3752 | <0.0001 |
| ST3GAL5      | 0.693 | -0.3751 | <0.0001 |
| SASH3        | 0.81  | -0.3751 | <0.0001 |
| DMTN         | 0.781 | -0.3749 | 0.0008  |
| TPSB2        | 0.541 | -0.3749 | <0.0001 |

|           |       |         |         |
|-----------|-------|---------|---------|
| C5orf49   | 0.452 | -0.3748 | <0.0001 |
| COX5BP3   | 0     | -0.3746 | <0.0001 |
| SIRPAP1   | 0.369 | -0.3746 | <0.0001 |
| USP2      | 0.76  | -0.3745 | <0.0001 |
| RASA3     | 0.854 | -0.3745 | <0.0001 |
| NNT       | 0.815 | -0.3744 | <0.0001 |
| EFCAB1    | 0.656 | -0.3742 | <0.0001 |
| CLEC12B   | 0.82  | -0.3741 | <0.0001 |
| RNA5SP482 | 0.021 | -0.374  | 0.0025  |
| ALAS2     | 0.923 | -0.3736 | 0.0002  |
| MIR575    | 0.534 | -0.3735 | 0.0453  |
| TBC1D9    | 0.869 | -0.3735 | <0.0001 |
| MBIP      | 0.697 | -0.3729 | <0.0001 |
| RORB      | 0.865 | -0.3728 | <0.0001 |
| STAT2     | 0.934 | -0.3726 | 0.0013  |
| HSD17B10  | 0.887 | -0.3725 | <0.0001 |
| TCL1A     | 0.883 | -0.3723 | <0.0001 |
| SHF       | 0.774 | -0.372  | <0.0001 |
| MIR605    | 0.381 | -0.3717 | 0.0008  |
| FAM224A   | 0.825 | -0.3715 | 0.0093  |
| CAB39L    | 0.758 | -0.3715 | <0.0001 |
| MTRNR2L10 | 0.504 | -0.3714 | 0.0196  |
| FBXO15    | 0.712 | -0.3712 | <0.0001 |
| C1orf210  | 0.891 | -0.3711 | 0.0003  |
| TRIM66    | 0.93  | -0.3709 | 0.0023  |
| RHOH      | 0.915 | -0.3708 | 0.0003  |
| BST2      | 0.865 | -0.3707 | <0.0001 |
| RNU6-709P | 0     | -0.3704 | 0.0182  |
| RPL23AP50 | 0     | -0.3704 | <0.0001 |
| LOC645202 | 0.133 | -0.3704 | <0.0001 |
| INSIG1    | 0.875 | -0.3704 | <0.0001 |
| RN7SL283P | 0.216 | -0.3702 | 0.0185  |
| IGHV1-69  | 0.741 | -0.3701 | 0.0025  |

|           |       |         |         |
|-----------|-------|---------|---------|
| GLYATL3   | 0.577 | -0.3701 | <0.0001 |
| MSMO1     | 0.513 | -0.37   | <0.0001 |
| OASL      | 0.855 | -0.37   | <0.0001 |
| KIR2DS3   | 0.84  | -0.3699 | 0.0006  |
| NUDT9     | 0.643 | -0.3698 | <0.0001 |
| ALOX5AP   | 0.831 | -0.3698 | <0.0001 |
| OAS2      | 0.896 | -0.3697 | <0.0001 |
| IFT122    | 0.874 | -0.3695 | <0.0001 |
| SLC7A4    | 0.844 | -0.3694 | <0.0001 |
| LIG4      | 0.916 | -0.3693 | 0.0002  |
| CTAGE11P  | 0.851 | -0.3693 | 0.0101  |
| PAN3-AS1  | 0.791 | -0.3693 | 0.028   |
| LINC00994 | 0.214 | -0.3693 | <0.0001 |
| NCOA7     | 0.854 | -0.3693 | <0.0001 |
| ACKR2     | 0.73  | -0.3689 | 0.0007  |
| IGLV3-19  | 0.864 | -0.3689 | 0.0155  |
| GYG2P1    | 0.57  | -0.3688 | 0.0259  |
| TTY21     | 0.247 | -0.3688 | <0.0001 |
| SCARNA2   | 0.587 | -0.3688 | <0.0001 |
| CXorf21   | 0.79  | -0.3688 | <0.0001 |
| MIR188    | 0.595 | -0.3686 | 0.0021  |
| PRSS3P1   | 0.156 | -0.3685 | <0.0001 |
| ZC3H12A   | 0.817 | -0.3684 | <0.0001 |
| SLA2      | 0.867 | -0.3684 | <0.0001 |
| CCDC152   | 0.584 | -0.3679 | <0.0001 |
| PEX11A    | 0.884 | -0.3677 | <0.0001 |
| RN7SL834P | 0.55  | -0.3676 | 0.0259  |
| MSR1      | 0.915 | -0.3675 | 0.0008  |
| CD84      | 0.798 | -0.3674 | <0.0001 |
| ORMDL3    | 0.811 | -0.3674 | <0.0001 |
| WIPF1     | 0.91  | -0.3673 | 0.0003  |
| TYROBP    | 0.925 | -0.3673 | 0.0008  |
| PTCRA     | 0.89  | -0.3671 | <0.0001 |

|              |       |         |         |
|--------------|-------|---------|---------|
| PGAM1P11     | 0     | -0.367  | <0.0001 |
| MTUS1        | 0.91  | -0.3669 | 0.0003  |
| MIR509-3     | 0     | -0.3665 | 0.0085  |
| MAG          | 0.903 | -0.3665 | <0.0001 |
| PPP1R2P6     | 0     | -0.3664 | <0.0001 |
| AKIRIN1      | 0.87  | -0.3663 | 0.0001  |
| TRIM10       | 0.714 | -0.3663 | <0.0001 |
| CLEC4A       | 0.794 | -0.3663 | <0.0001 |
| LOC728853    | 0.361 | -0.3661 | 0.0319  |
| PCOLCE-AS1   | 0.873 | -0.366  | 0.0498  |
| ANOS2P       | 0     | -0.3658 | <0.0001 |
| KIR2DL1      | 0.876 | -0.3658 | <0.0001 |
| MIPEP        | 0.894 | -0.3658 | <0.0001 |
| GNG7         | 0.819 | -0.3657 | <0.0001 |
| PAN3         | 0.869 | -0.3654 | 0.0001  |
| TCAIM        | 0.848 | -0.3653 | 0.0116  |
| LOC101929622 | 0     | -0.3653 | <0.0001 |
| PIWIL4       | 0.821 | -0.365  | <0.0001 |
| RUBCNL       | 0     | -0.3648 | <0.0001 |
| OSBPL6       | 0.666 | -0.3647 | <0.0001 |
| IL24         | 0.903 | -0.3647 | <0.0001 |
| FAM27E2      | 0.315 | -0.3646 | 0.0007  |
| CACNB2       | 0.906 | -0.3646 | <0.0001 |
| MYO16        | 0.919 | -0.3644 | 0.0013  |
| D2HGDH       | 0.823 | -0.3643 | <0.0001 |
| CAPZA3       | 0.851 | -0.3643 | <0.0001 |
| C11orf97     | 0.574 | -0.3642 | 0.0008  |
| C17orf107    | 0.773 | -0.3641 | 0.0036  |
| STON1        | 0.721 | -0.364  | <0.0001 |
| BMP2K        | 0.886 | -0.364  | <0.0001 |
| SHTN1        | 0.031 | -0.3639 | <0.0001 |
| CDK3         | 0.958 | -0.3637 | 0.0279  |
| TKFC         | 0.1   | -0.3636 | <0.0001 |

|              |       |         |         |
|--------------|-------|---------|---------|
| CMKLR1       | 0.891 | -0.3636 | <0.0001 |
| IFI44        | 0.779 | -0.3635 | <0.0001 |
| ETFA         | 0.896 | -0.3635 | <0.0001 |
| LINC00313    | 0.454 | -0.3634 | <0.0001 |
| CPT1A        | 0.904 | -0.3634 | <0.0001 |
| PRR5-ARHGAP8 | 0.691 | -0.3633 | 0.0063  |
| LCP1         | 0.823 | -0.3632 | <0.0001 |
| CSF2RB       | 0.912 | -0.3631 | 0.0001  |
| CD79B        | 0.913 | -0.3631 | 0.0001  |
| POMC         | 0.924 | -0.3631 | 0.0008  |
| RNU2-7P      | 0.572 | -0.3631 | 0.0083  |
| LOC100506422 | 0.23  | -0.363  | 0.0006  |
| TDGF1P6      | 0     | -0.3629 | <0.0001 |
| IRF9         | 0.944 | -0.3628 | 0.0038  |
| ANPEP        | 0.845 | -0.3627 | <0.0001 |
| CDHR5        | 0.656 | -0.3624 | <0.0001 |
| WDR64        | 0.663 | -0.3624 | <0.0001 |
| C1orf21      | 0.806 | -0.3623 | <0.0001 |
| UNC93A       | 0.835 | -0.3623 | <0.0001 |
| LINC00302    | 0.824 | -0.3622 | 0.0198  |
| TMX3         | 0.903 | -0.3621 | 0.0041  |
| ZMAT3        | 0.75  | -0.3618 | <0.0001 |
| MIR4318      | 0.473 | -0.3617 | 0.031   |
| PTPRCAP      | 0.848 | -0.3617 | <0.0001 |
| NR1H3        | 0.89  | -0.3615 | 0.0002  |
| ZNF483       | 0.749 | -0.3615 | <0.0001 |
| ERMAP        | 0.83  | -0.3615 | <0.0001 |
| LINC00671    | 0.739 | -0.3614 | 0.0053  |
| CBX1P2       | 0     | -0.3613 | <0.0001 |
| MS4A3        | 0.624 | -0.3613 | <0.0001 |
| MIR4503      | 0     | -0.3612 | 0.0303  |
| ERICH1       | 0.86  | -0.3611 | <0.0001 |
| SOX15        | 0.897 | -0.3608 | 0.0002  |



|             |       |         |         |
|-------------|-------|---------|---------|
| APOC4-APOC2 | 0.303 | -0.3608 | 0.0008  |
| TRAPPC3L    | 0.761 | -0.3608 | 0.0016  |
| SIRPB1      | 0.853 | -0.3607 | <0.0001 |
| N4BP1       | 0.541 | -0.3606 | <0.0001 |
| JADE1       | 0.869 | -0.3604 | 0.0206  |
| MIR487A     | 0     | -0.3603 | 0.0001  |
| GUCY2EP     | 0.58  | -0.3602 | 0.0462  |
| PEX13       | 0.89  | -0.3601 | 0.0001  |
| USP17L12    | 0.492 | -0.36   | 0.0128  |
| SHANK2-AS1  | 0     | -0.36   | <0.0001 |
| R3HCC1      | 0.672 | -0.36   | <0.0001 |
| MRGPRG      | 0.791 | -0.3598 | 0.002   |
| MMADHC      | 0.763 | -0.3596 | <0.0001 |
| TRIM14      | 0.888 | -0.3596 | <0.0001 |
| ADIPOR2     | 0.89  | -0.3596 | <0.0001 |
| SDC4        | 0.898 | -0.3595 | 0.0002  |
| MYEOV       | 0.803 | -0.3594 | <0.0001 |
| C8G         | 0.872 | -0.3591 | <0.0001 |
| ZNF654      | 0.889 | -0.359  | 0.0002  |
| BZW1        | 0.93  | -0.3588 | 0.0013  |
| NRON        | 0     | -0.3588 | <0.0001 |
| LINC01565   | 0.148 | -0.3587 | <0.0001 |
| DZIP1       | 0.581 | -0.3587 | <0.0001 |
| MIR4686     | 0.48  | -0.3586 | <0.0001 |
| AURKC       | 0.723 | -0.3585 | <0.0001 |
| ANK2        | 0.926 | -0.3583 | 0.0005  |
| PLEKHG1     | 0.699 | -0.3583 | <0.0001 |
| SLC35A1     | 0.93  | -0.358  | 0.0027  |
| MIR762      | 0.455 | -0.358  | 0.0176  |
| AKAIN1      | 0     | -0.3578 | <0.0001 |
| AMY2B       | 0.925 | -0.3577 | 0.0072  |
| LCMT1-AS2   | 0     | -0.3577 | <0.0001 |
| SLIT2       | 0.728 | -0.3577 | <0.0001 |

|                 |       |         |         |
|-----------------|-------|---------|---------|
| LAT2            | 0.816 | -0.3577 | <0.0001 |
| ZNF839P1        | 0     | -0.3574 | <0.0001 |
| LSR             | 0.856 | -0.357  | <0.0001 |
| DEFB105B        | 0.769 | -0.3569 | 0.0065  |
| TSC22D2         | 0.907 | -0.3568 | 0.0004  |
| PPP2R2D         | 0.814 | -0.3568 | <0.0001 |
| HLA-DRB6        | 0.861 | -0.3567 | 0.0001  |
| IL20RB-AS1      | 0.371 | -0.3567 | <0.0001 |
| LINC00954       | 0.672 | -0.3566 | 0.0022  |
| MIR1184-1       | 0     | -0.3564 | 0.0322  |
| ELP2            | 0.806 | -0.3562 | <0.0001 |
| AP4S1           | 0.816 | -0.3562 | <0.0001 |
| COPG2IT1        | 0.608 | -0.3561 | 0.0001  |
| CXorf66         | 0.686 | -0.3561 | 0.0014  |
| SLC25A14P1      | 0.431 | -0.3559 | <0.0001 |
| MPHOSPH8        | 0.89  | -0.3557 | 0.0004  |
| IQCJ-SCHIP1-AS1 | 0.778 | -0.3557 | 0.0117  |
| RPS7P14         | 0     | -0.3557 | <0.0001 |
| CDRT15P1        | 0.571 | -0.3556 | 0.038   |
| LINC01149       | 0.129 | -0.3556 | <0.0001 |
| ELMO3           | 0.731 | -0.3556 | <0.0001 |
| SEMA4B          | 0.838 | -0.3556 | <0.0001 |
| SNCA            | 0.91  | -0.3555 | 0.0004  |
| TLR10           | 0.753 | -0.3555 | <0.0001 |
| MAGEH1          | 0.726 | -0.3554 | <0.0001 |
| CD6             | 0.911 | -0.3553 | 0.0002  |
| HCAR2           | 0.654 | -0.3553 | 0.0007  |
| MICALCL         | 0.693 | -0.3553 | <0.0001 |
| RPL36AP33       | 0.605 | -0.355  | 0.0057  |
| MIR4252         | 0     | -0.355  | 0.0341  |
| LOC283299       | 0.466 | -0.3547 | 0.0245  |
| STT3A-AS1       | 0     | -0.3545 | 0.0342  |
| SLC25A4         | 0.823 | -0.3545 | <0.0001 |

|              |       |         |         |
|--------------|-------|---------|---------|
| MYRIP        | 0.909 | -0.3544 | 0.0005  |
| ARID5A       | 0.887 | -0.3544 | <0.0001 |
| HLX          | 0.76  | -0.3541 | <0.0001 |
| ST3GAL1      | 0.909 | -0.354  | 0.0005  |
| SERPINF1     | 0.897 | -0.3539 | 0.0004  |
| MEI4         | 0     | -0.3539 | <0.0001 |
| FAM160A2     | 0.911 | -0.3538 | 0.0022  |
| IAPP         | 0.788 | -0.3537 | <0.0001 |
| FAM30A       | 0.621 | -0.3532 | <0.0001 |
| IL9RP3       | 0     | -0.353  | <0.0001 |
| ZCCHC14      | 0.906 | -0.3528 | 0.0005  |
| XKR4         | 0.777 | -0.3528 | <0.0001 |
| TMIGD2       | 0.735 | -0.3527 | <0.0001 |
| LOC100128770 | 0     | -0.3526 | 0.0025  |
| SCTR         | 0.88  | -0.3526 | <0.0001 |
| IFT43        | 0.811 | -0.3525 | 0.0065  |
| C6orf141     | 0.622 | -0.3525 | <0.0001 |
| SMC5         | 0.864 | -0.3525 | <0.0001 |
| TNFSF8       | 0.889 | -0.3524 | 0.0001  |
| MIR517A      | 0     | -0.3523 | 0.0344  |
| CEACAM21     | 0.82  | -0.3521 | <0.0001 |
| IGLJ6        | 0     | -0.3518 | <0.0001 |
| C2orf42      | 0.792 | -0.3518 | <0.0001 |
| SCARNA17     | 0.898 | -0.3517 | 0.0245  |
| NCMAP        | 0.76  | -0.3517 | 0.0282  |
| LMO7         | 0.66  | -0.3517 | <0.0001 |
| S1PR5        | 0.68  | -0.3515 | <0.0001 |
| GGTLC1       | 0.875 | -0.3514 | 0.0005  |
| EVC2         | 0.951 | -0.3513 | 0.0103  |
| HDHD5        | 0     | -0.3513 | <0.0001 |
| SLC25A36     | 0.772 | -0.3513 | <0.0001 |
| MAFB         | 0.86  | -0.3513 | <0.0001 |
| HLA-DOA      | 0.92  | -0.351  | 0.0004  |

|              |       |         |         |
|--------------|-------|---------|---------|
| TYRO3P       | 0.893 | -0.351  | 0.0116  |
| DPP7         | 0.662 | -0.351  | <0.0001 |
| TNIK         | 0.758 | -0.351  | <0.0001 |
| RSPH10B2     | 0.905 | -0.3509 | 0.0428  |
| RN7SL213P    | 0.473 | -0.3508 | <0.0001 |
| TMPRSS11CP   | 0     | -0.3507 | <0.0001 |
| FAM171A1     | 0.116 | -0.3507 | <0.0001 |
| RTP3         | 0.743 | -0.3507 | <0.0001 |
| TTY14        | 0.721 | -0.3506 | 0.0002  |
| GUSBP5       | 0.622 | -0.3506 | 0.0003  |
| KIF12        | 0.815 | -0.3506 | <0.0001 |
| MTND2P12     | 0.11  | -0.3505 | <0.0001 |
| OCIAD1       | 0.694 | -0.3505 | <0.0001 |
| ARHGEF19-AS1 | 0     | -0.3504 | 0.0171  |
| SNHG14       | 0.418 | -0.3502 | <0.0001 |
| NCR3         | 0.758 | -0.3501 | <0.0001 |
| MIR631       | 0     | -0.35   | 0.0007  |
| CCDC39       | 0.867 | -0.35   | 0.0007  |
| TRAPPC8      | 0.821 | -0.3499 | 0.0005  |
| LOC391092    | 0.464 | -0.3498 | 0.0005  |
| FAM76B       | 0.903 | -0.3497 | 0.0006  |
| GNGT2        | 0.892 | -0.3496 | 0.0001  |
| DYNLRB2      | 0.753 | -0.3496 | <0.0001 |
| RNA5SP224    | 0     | -0.3495 | 0.0047  |
| FAM83E       | 0.731 | -0.3495 | <0.0001 |
| FLJ42393     | 0.687 | -0.3494 | 0.0011  |
| MON2         | 0.91  | -0.3493 | 0.0009  |
| GGT3P        | 0.821 | -0.3493 | 0.0036  |
| ELF2         | 0.918 | -0.3492 | 0.0004  |
| RASSF9       | 0.853 | -0.3491 | 0.0003  |
| LINC00307    | 0.569 | -0.3491 | 0.0072  |
| GRTP1        | 0.806 | -0.3489 | <0.0001 |
| COQ2         | 0.816 | -0.3488 | <0.0001 |

|              |       |         |         |
|--------------|-------|---------|---------|
| SRL          | 0.779 | -0.3486 | <0.0001 |
| DST          | 0.883 | -0.3486 | <0.0001 |
| LOC100996437 | 0     | -0.3485 | 0.0368  |
| NRIR         | 0     | -0.3485 | <0.0001 |
| TRDV2        | 0.23  | -0.3484 | <0.0001 |
| NFATC2       | 0.826 | -0.3484 | <0.0001 |
| CRY2         | 0.933 | -0.3483 | 0.0013  |
| REERG        | 0.736 | -0.3482 | <0.0001 |
| POM121L8P    | 0.683 | -0.3481 | 0.0003  |
| LINC01743    | 0.448 | -0.3478 | <0.0001 |
| OR5AK2       | 0.824 | -0.3477 | 0.0003  |
| LRRTM3       | 0.492 | -0.3477 | <0.0001 |
| LOC646471    | 0.651 | -0.3476 | 0.0026  |
| PCF11        | 0.912 | -0.3475 | 0.0011  |
| CBWD3        | 0.903 | -0.3475 | 0.0222  |
| CDY1         | 0.619 | -0.3474 | <0.0001 |
| DSTNP1       | 0     | -0.3473 | <0.0001 |
| TAGLN        | 0.86  | -0.3471 | <0.0001 |
| ENOSF1       | 0.915 | -0.3469 | 0.0003  |
| SYNE2        | 0.92  | -0.3468 | 0.0012  |
| ZBTB20       | 0.931 | -0.3468 | 0.0022  |
| INPP5K       | 0.708 | -0.3468 | <0.0001 |
| UNC5CL       | 0.811 | -0.3467 | 0.0001  |
| MIR655       | 0.388 | -0.3467 | 0.0018  |
| LOC100303749 | 0.129 | -0.3467 | 0.0288  |
| FGFBP2       | 0.563 | -0.3466 | <0.0001 |
| SLC5A7       | 0.821 | -0.3466 | <0.0001 |
| CFH          | 0.885 | -0.3466 | <0.0001 |
| RNF11        | 0.796 | -0.3465 | <0.0001 |
| APOBEC3C     | 0.842 | -0.3465 | <0.0001 |
| MORC3        | 0.816 | -0.3462 | <0.0001 |
| BATF3        | 0.838 | -0.3462 | <0.0001 |
| LOC100505921 | 0.385 | -0.3461 | 0.0304  |

|              |       |         |         |
|--------------|-------|---------|---------|
| FUT3         | 0.914 | -0.346  | 0.0003  |
| LINC01043    | 0.41  | -0.346  | <0.0001 |
| ZC3H12C      | 0.834 | -0.3459 | 0.0002  |
| SIDT1        | 0.755 | -0.3459 | <0.0001 |
| AKAP13       | 0.896 | -0.3459 | <0.0001 |
| LINC00161    | 0.869 | -0.3458 | 0.025   |
| GBP1P1       | 0.853 | -0.3457 | 0.0474  |
| LOC101928370 | 0     | -0.3457 | <0.0001 |
| F13B         | 0.883 | -0.3456 | <0.0001 |
| SELPLG       | 0.904 | -0.3454 | 0.0004  |
| ASMTL        | 0.941 | -0.3454 | 0.0041  |
| LINC00377    | 0     | -0.3452 | <0.0001 |
| ARHGEF12     | 0.914 | -0.3451 | 0.0004  |
| KRT18P34     | 0     | -0.3451 | <0.0001 |
| ARHGEF7-AS2  | 0.592 | -0.345  | 0.0008  |
| MIR890       | 0     | -0.3449 | 0.0019  |
| ZNF326       | 0.917 | -0.3449 | 0.0033  |
| CRISPLD1     | 0.819 | -0.3449 | <0.0001 |
| TRIM58       | 0.835 | -0.3448 | <0.0001 |
| OBSL1        | 0.769 | -0.3441 | <0.0001 |
| NR2E3        | 0.778 | -0.344  | <0.0001 |
| CEACAM6      | 0.839 | -0.3439 | <0.0001 |
| SPATA13      | 0.598 | -0.3438 | <0.0001 |
| MIR941-2     | 0.451 | -0.3436 | 0.018   |
| RN7SL733P    | 0     | -0.3436 | <0.0001 |
| CDKL2        | 0.499 | -0.3436 | <0.0001 |
| SMG1         | 0.898 | -0.3435 | 0.0055  |
| TNFAIP2      | 0.891 | -0.3432 | 0.0002  |
| IL12RB1      | 0.878 | -0.343  | <0.0001 |
| CREBRF       | 0.895 | -0.3429 | 0.0436  |
| MIR450A1     | 0     | -0.3427 | 0.002   |
| MIR149       | 0.826 | -0.3427 | 0.0161  |
| MIR761       | 0     | -0.3426 | 0.0137  |

|           |       |         |         |
|-----------|-------|---------|---------|
| MEIOB     | 0.731 | -0.3426 | 0.0212  |
| SPATA1    | 0.819 | -0.3426 | <0.0001 |
| COL8A2    | 0.776 | -0.3425 | <0.0001 |
| PNPO      | 0.789 | -0.3425 | <0.0001 |
| GUCA1B    | 0.772 | -0.3424 | <0.0001 |
| ZDHHC1    | 0.694 | -0.3423 | <0.0001 |
| APOL3     | 0.806 | -0.3423 | <0.0001 |
| LINC00606 | 0.651 | -0.3422 | 0.0027  |
| OSCAR     | 0.622 | -0.3422 | <0.0001 |
| RIN2      | 0.871 | -0.3419 | <0.0001 |
| HSD3B2    | 0.923 | -0.3418 | 0.0008  |
| BRINP1    | 0.854 | -0.3417 | 0.0175  |
| BCL6      | 0.914 | -0.3415 | 0.0004  |
| CLEC17A   | 0.413 | -0.3413 | <0.0001 |
| MYBPH     | 0.772 | -0.3413 | <0.0001 |
| LMAN1     | 0.917 | -0.3411 | 0.0006  |
| ABCC6     | 0.929 | -0.3411 | 0.0063  |
| GCAT      | 0.887 | -0.341  | <0.0001 |
| CSF3      | 0.807 | -0.3408 | <0.0001 |
| KIR2DS2   | 0.827 | -0.3406 | 0.0004  |
| XKR6      | 0.685 | -0.3406 | <0.0001 |
| ZFYVE21   | 0.812 | -0.3406 | <0.0001 |
| SNORD103A | 0.32  | -0.3404 | 0.0001  |
| CASR      | 0.813 | -0.3404 | <0.0001 |
| DEF6      | 0.763 | -0.3403 | <0.0001 |
| TPT1P9    | 0     | -0.3402 | <0.0001 |
| IGFBP5    | 0.869 | -0.3402 | <0.0001 |
| ACSF3     | 0.846 | -0.3399 | 0.0001  |
| SNORD68   | 0.764 | -0.3399 | 0.037   |
| RNF175    | 0.849 | -0.3398 | 0.0001  |
| PPP1R8P1  | 0     | -0.3398 | <0.0001 |
| STX17     | 0.842 | -0.3397 | <0.0001 |
| HAVCR2    | 0.849 | -0.3397 | <0.0001 |

|              |       |         |         |
|--------------|-------|---------|---------|
| LINC00459    | 0     | -0.3394 | 0.0253  |
| CLRN1-AS1    | 0.655 | -0.3392 | 0.004   |
| DOCK9-AS1    | 0     | -0.3391 | <0.0001 |
| VWA2         | 0.786 | -0.339  | 0.0001  |
| IL23A        | 0.791 | -0.339  | <0.0001 |
| ARMCX2       | 0.868 | -0.339  | <0.0001 |
| PTP4A1P7     | 0.541 | -0.3387 | 0.0115  |
| BBS5         | 0.867 | -0.3383 | 0.0001  |
| RN7SKP78     | 0     | -0.3383 | <0.0001 |
| ABHD14A-ACY1 | 0.375 | -0.3382 | 0.0085  |
| MROH7        | 0.885 | -0.3382 | 0.0227  |
| MIR4760      | 0     | -0.3382 | 0.0426  |
| KCNIP1       | 0.771 | -0.3382 | <0.0001 |
| PRKCZ        | 0.904 | -0.3381 | 0.0009  |
| YBX1P8       | 0     | -0.3381 | <0.0001 |
| PDK2         | 0.903 | -0.338  | 0.0005  |
| C4BPB        | 0.876 | -0.3378 | <0.0001 |
| DCBLD1       | 0.751 | -0.3374 | <0.0001 |
| CSRP1        | 0.877 | -0.3374 | <0.0001 |
| MGST1        | 0.833 | -0.3372 | <0.0001 |
| ZNF630       | 0.858 | -0.3371 | 0.0003  |
| DENND4A      | 0.92  | -0.3371 | 0.0008  |
| MIR4490      | 0     | -0.3371 | 0.0438  |
| HMGN3        | 0.876 | -0.3371 | <0.0001 |
| RBMXL2       | 0.854 | -0.3369 | 0.0001  |
| ODF3B        | 0.567 | -0.3369 | <0.0001 |
| SS18         | 0.929 | -0.3368 | 0.0028  |
| MIR3160-1    | 0     | -0.3368 | 0.0431  |
| ARHGEF25     | 0.637 | -0.3366 | <0.0001 |
| PTGR1        | 0.687 | -0.3365 | <0.0001 |
| PYGL         | 0.853 | -0.3365 | <0.0001 |
| PIGR         | 0.884 | -0.3364 | 0.0004  |
| ATP2C2       | 0.728 | -0.3362 | <0.0001 |



|              |       |         |         |
|--------------|-------|---------|---------|
| VSTM1        | 0.826 | -0.3362 | <0.0001 |
| MIR182       | 0.723 | -0.3361 | 0.0024  |
| HMCN1        | 0.754 | -0.3359 | <0.0001 |
| TANC1        | 0.861 | -0.3356 | 0.0004  |
| APOC1        | 0.921 | -0.3356 | 0.0022  |
| ZNF347       | 0.469 | -0.3356 | <0.0001 |
| DCAF13P1     | 0.413 | -0.3354 | <0.0001 |
| IGFBP2       | 0.846 | -0.3354 | <0.0001 |
| CCDC168      | 0.896 | -0.3353 | 0.0247  |
| CLDN1        | 0.86  | -0.3352 | <0.0001 |
| FCHO1        | 0.867 | -0.3349 | <0.0001 |
| SAR1B        | 0.637 | -0.3347 | <0.0001 |
| RXRA         | 0.942 | -0.3346 | 0.0067  |
| ATRNL1       | 0.764 | -0.3346 | <0.0001 |
| LOC100129055 | 0.278 | -0.3345 | <0.0001 |
| TTPA         | 0.87  | -0.3345 | <0.0001 |
| DGUOK-AS1    | 0.501 | -0.3344 | 0.0346  |
| OTUD1        | 0.71  | -0.3344 | <0.0001 |
| MTND5P28     | 0     | -0.3343 | <0.0001 |
| BHLHE23      | 0.891 | -0.3341 | 0.0125  |
| SMIM3        | 0.448 | -0.3341 | <0.0001 |
| PER3         | 0.796 | -0.3341 | <0.0001 |
| HECTD1       | 0.814 | -0.3341 | <0.0001 |
| RFX2         | 0.85  | -0.334  | <0.0001 |
| PPP3CC       | 0.879 | -0.3339 | 0.0001  |
| CNEP1R1      | 0.876 | -0.3339 | 0.033   |
| GOLGA8CP     | 0.443 | -0.3339 | <0.0001 |
| PPP2R1B      | 0.928 | -0.3337 | 0.0028  |
| LINC00930    | 0.453 | -0.3337 | <0.0001 |
| PLA2G2A      | 0.829 | -0.3336 | <0.0001 |
| ANGPTL2      | 0.867 | -0.3335 | <0.0001 |
| C5orf66-AS2  | 0     | -0.3334 | <0.0001 |
| RN7SL172P    | 0.353 | -0.3332 | <0.0001 |

|              |       |         |         |
|--------------|-------|---------|---------|
| TTY10        | 0.764 | -0.3331 | 0.0003  |
| RPS27L       | 0.886 | -0.3331 | 0.0004  |
| MAP9         | 0.798 | -0.3331 | <0.0001 |
| LBP          | 0.828 | -0.333  | <0.0001 |
| AGKP1        | 0.21  | -0.3329 | <0.0001 |
| NDNF         | 0.645 | -0.3329 | <0.0001 |
| MIR660       | 0     | -0.3328 | 0.0026  |
| NHLRC2       | 0.931 | -0.3328 | 0.0056  |
| SAMD9        | 0.713 | -0.3327 | <0.0001 |
| COQ6         | 0.92  | -0.3326 | 0.001   |
| LRCH1        | 0.717 | -0.3326 | <0.0001 |
| FURIN        | 0.883 | -0.3326 | <0.0001 |
| GOLGA6A      | 0.899 | -0.3325 | 0.005   |
| LINC00431    | 0     | -0.3325 | <0.0001 |
| C2CD4C       | 0.836 | -0.3324 | 0.0002  |
| ATXN7        | 0.916 | -0.3323 | 0.0009  |
| LOC101928335 | 0.082 | -0.3322 | <0.0001 |
| PUS3         | 0.559 | -0.3321 | <0.0001 |
| S1PR4        | 0.682 | -0.3321 | <0.0001 |
| SOX8         | 0.828 | -0.3319 | <0.0001 |
| GJA4         | 0.88  | -0.3319 | <0.0001 |
| RNF13        | 0.876 | -0.3318 | 0.0001  |
| ZFYVE28      | 0.879 | -0.3317 | 0.0007  |
| TSC22D1-AS1  | 0.708 | -0.3317 | 0.0074  |
| DNM1P46      | 0.866 | -0.3317 | 0.0305  |
| SNORA53      | 0.896 | -0.3317 | 0.0352  |
| MIR27B       | 0.876 | -0.3317 | 0.0415  |
| NFAT5        | 0.923 | -0.3316 | 0.0024  |
| LINC00387    | 0     | -0.3315 | 0.0402  |
| FLI1         | 0.919 | -0.3313 | 0.0008  |
| PRSS48       | 0.585 | -0.3313 | <0.0001 |
| TPST1        | 0.923 | -0.3312 | 0.003   |
| CLDN24       | 0.354 | -0.3312 | <0.0001 |

|          |       |         |         |
|----------|-------|---------|---------|
| TTY17A   | 0.52  | -0.3311 | 0.0078  |
| WLS      | 0.576 | -0.3311 | <0.0001 |
| PFN3     | 0.83  | -0.3309 | 0.0006  |
| HSD17B12 | 0.926 | -0.3307 | 0.0017  |
| ARSE     | 0.899 | -0.3306 | 0.0005  |
| MLXIPL   | 0.897 | -0.3306 | 0.0007  |
| TIMP2    | 0.913 | -0.3306 | 0.0014  |
| TNFSF10  | 0.874 | -0.3305 | 0.0001  |
| SNORD127 | 0.656 | -0.3303 | 0.0258  |
| PRKAA1   | 0.902 | -0.3299 | 0.0007  |
| COL20A1  | 0.853 | -0.3298 | <0.0001 |
| PHC2     | 0.877 | -0.3297 | 0.0002  |
| ESPN     | 0.811 | -0.3295 | <0.0001 |
| AKAP9    | 0.93  | -0.3294 | 0.0017  |
| MYADM    | 0.926 | -0.3294 | 0.0071  |
| KIR3DL1  | 0.782 | -0.3294 | <0.0001 |
| FAM223B  | 0     | -0.3292 | <0.0001 |
| RECK     | 0.845 | -0.3292 | <0.0001 |
| RNU6-82P | 0.648 | -0.329  | 0.0175  |
| TMEM140  | 0.763 | -0.329  | <0.0001 |
| SNORD20  | 0.433 | -0.3288 | <0.0001 |
| TM2D2    | 0.79  | -0.3288 | <0.0001 |
| ANXA8L1  | 0.766 | -0.3287 | 0.001   |
| CACNA2D1 | 0.877 | -0.3287 | <0.0001 |
| RBMXL1   | 0.872 | -0.3285 | 0.0088  |
| CAAP1    | 0.84  | -0.3285 | 0.0092  |
| MIR587   | 0.558 | -0.3284 | 0.0114  |
| MIR514A3 | 0     | -0.3284 | 0.0495  |
| ABHD13   | 0.749 | -0.3284 | <0.0001 |
| ERBB2    | 0.887 | -0.3283 | 0.0001  |
| PEG3     | 0.92  | -0.3283 | 0.0037  |
| TMBIM6   | 0.726 | -0.3281 | <0.0001 |
| SLC16A10 | 0.806 | -0.328  | <0.0001 |

|              |       |         |         |
|--------------|-------|---------|---------|
| IL21R        | 0.84  | -0.328  | <0.0001 |
| GBP5         | 0.821 | -0.3276 | <0.0001 |
| CMPK1        | 0.75  | -0.3275 | <0.0001 |
| GALNTL6      | 0.734 | -0.3274 | <0.0001 |
| MIDN         | 0.835 | -0.3274 | <0.0001 |
| MIR200A      | 0.776 | -0.3271 | 0.0071  |
| INCA1        | 0.605 | -0.3271 | <0.0001 |
| GMPR         | 0.688 | -0.3271 | <0.0001 |
| ENDOV        | 0.751 | -0.327  | 0.0011  |
| ZNF700       | 0.922 | -0.327  | 0.0108  |
| LOC102546299 | 0     | -0.327  | <0.0001 |
| MS4A6E       | 0.701 | -0.327  | <0.0001 |
| ANKRD12      | 0.885 | -0.3269 | 0.0002  |
| SNORA67      | 0.741 | -0.3269 | 0.0311  |
| MIR1238      | 0.813 | -0.3269 | 0.0357  |
| KIR3DL2      | 0.907 | -0.3268 | 0.008   |
| HNRNPA3P2    | 0.376 | -0.3268 | <0.0001 |
| RBMS1P1      | 0     | -0.3267 | <0.0001 |
| PQLC3        | 0.524 | -0.3267 | <0.0001 |
| CD8B         | 0.909 | -0.3265 | 0.0007  |
| SNORD116-10  | 0.661 | -0.3265 | 0.0447  |
| CYP4F8       | 0.829 | -0.3264 | <0.0001 |
| TENM3        | 0.858 | -0.3263 | 0.0136  |
| SNORA46      | 0.901 | -0.3261 | 0.0333  |
| MIR1224      | 0     | -0.326  | <0.0001 |
| ASMTL-AS1    | 0.657 | -0.3259 | 0.0006  |
| IL15         | 0.839 | -0.3259 | <0.0001 |
| LOC100130238 | 0.74  | -0.3257 | 0.043   |
| METTTL14     | 0.82  | -0.3256 | 0.0002  |
| LONRF3       | 0.858 | -0.3256 | <0.0001 |
| MAB21L2      | 0.659 | -0.3255 | <0.0001 |
| ZNF274       | 0.896 | -0.3254 | 0.0006  |
| INS          | 0.921 | -0.3253 | 0.0044  |

|              |       |         |         |
|--------------|-------|---------|---------|
| RALGAPA2     | 0.874 | -0.3253 | 0.0046  |
| SLITRK2      | 0.903 | -0.3252 | 0.0025  |
| LPAR5        | 0.77  | -0.3252 | <0.0001 |
| NFKBID       | 0.857 | -0.3251 | 0.001   |
| TRERF1       | 0.706 | -0.3251 | <0.0001 |
| KRTAP2-2     | 0.412 | -0.325  | <0.0001 |
| VWCE         | 0.841 | -0.3249 | 0.0002  |
| KLHL3        | 0.85  | -0.3249 | <0.0001 |
| LOC100505795 | 0.365 | -0.3248 | 0.0424  |
| OSBP         | 0.877 | -0.3246 | 0.0004  |
| BCL2         | 0.917 | -0.3246 | 0.0009  |
| DANT2        | 0     | -0.3245 | <0.0001 |
| ZNF502       | 0.846 | -0.3244 | 0.0003  |
| LOC646629    | 0     | -0.3241 | 0.0261  |
| FUZ          | 0.8   | -0.324  | <0.0001 |
| MLF2         | 0.899 | -0.3235 | 0.0008  |
| EIF2AK4      | 0.907 | -0.3235 | 0.0018  |
| RGS1         | 0.791 | -0.3235 | <0.0001 |
| MEGF9        | 0.749 | -0.3234 | <0.0001 |
| PPP1R12B     | 0.938 | -0.3233 | 0.0068  |
| RBMS3-AS1    | 0     | -0.3233 | <0.0001 |
| PPP3CB-AS1   | 0.659 | -0.3232 | 0.0147  |
| CD68         | 0.952 | -0.3231 | 0.0237  |
| TMEM134      | 0.773 | -0.3231 | <0.0001 |
| TBC1D10C     | 0.83  | -0.3228 | 0.0002  |
| FFAR2        | 0.889 | -0.3228 | 0.0002  |
| ASXL3        | 0.905 | -0.3227 | 0.0013  |
| C16orf95     | 0.887 | -0.3227 | 0.0197  |
| KNG1         | 0.857 | -0.3226 | <0.0001 |
| AMFR         | 0.902 | -0.3223 | 0.0004  |
| FAM107A      | 0.908 | -0.3223 | 0.0006  |
| SYNJ2BP      | 0.849 | -0.3223 | 0.0011  |
| PRG1         | 0.578 | -0.3222 | 0.003   |

|              |       |         |         |
|--------------|-------|---------|---------|
| MIR510       | 0.159 | -0.3222 | 0.0048  |
| LRBA         | 0.836 | -0.3222 | <0.0001 |
| UBA52P8      | 0     | -0.3221 | <0.0001 |
| NSUN7        | 0.757 | -0.3219 | <0.0001 |
| ADGRD1       | 0.338 | -0.3217 | <0.0001 |
| GYPE         | 0.855 | -0.3217 | <0.0001 |
| P2RX1        | 0.915 | -0.3216 | 0.0016  |
| PLXNB1       | 0.932 | -0.3216 | 0.0048  |
| ARNTL2-AS1   | 0.639 | -0.3214 | 0.0055  |
| GPRASP2      | 0.644 | -0.3214 | <0.0001 |
| RNU1-100P    | 0     | -0.3213 | <0.0001 |
| SIRT1        | 0.787 | -0.3213 | <0.0001 |
| POM121L10P   | 0.81  | -0.3212 | 0.0104  |
| LRMP         | 0.871 | -0.3211 | <0.0001 |
| ALPK1        | 0.883 | -0.321  | 0.0002  |
| ECI2         | 0.88  | -0.3207 | 0.014   |
| GSTT2B       | 0.791 | -0.3206 | 0.0067  |
| KIR2DS1      | 0.808 | -0.3206 | <0.0001 |
| BANF1P2      | 0     | -0.3204 | <0.0001 |
| OR7E93P      | 0.165 | -0.3204 | <0.0001 |
| KRTAP10-8    | 0.803 | -0.3203 | 0.0002  |
| LINC00476    | 0.797 | -0.3202 | 0.0139  |
| TBC1D10A     | 0.861 | -0.3201 | 0.0007  |
| WHAMM        | 0.904 | -0.32   | 0.0124  |
| TNKS1BP1     | 0.887 | -0.3199 | 0.0016  |
| RNA5SP167    | 0     | -0.3199 | 0.0095  |
| ARMCX1       | 0.756 | -0.3198 | <0.0001 |
| UTY          | 0.532 | -0.3197 | <0.0001 |
| ANKRD20A1    | 0.769 | -0.3196 | 0.0021  |
| LOC101929272 | 0.274 | -0.3196 | <0.0001 |
| PRDM8        | 0.742 | -0.3196 | <0.0001 |
| ADAM33       | 0.89  | -0.3195 | 0.0008  |
| SIRPD        | 0.713 | -0.3194 | <0.0001 |

|              |       |         |         |
|--------------|-------|---------|---------|
| LONRF2       | 0.793 | -0.3194 | <0.0001 |
| PRSS57       | 0.042 | -0.3192 | <0.0001 |
| GRIP2        | 0.771 | -0.3192 | <0.0001 |
| RASGRP1      | 0.837 | -0.3192 | <0.0001 |
| ZFY          | 0.396 | -0.3191 | <0.0001 |
| SNORD116-28  | 0.122 | -0.319  | 0.0204  |
| PRODH        | 0.878 | -0.3188 | 0.0014  |
| LOC100506801 | 0.383 | -0.3188 | 0.0418  |
| GLYCAM1      | 0.736 | -0.3187 | 0.0003  |
| HHIPL1       | 0.867 | -0.3187 | 0.0008  |
| SLC26A10     | 0.915 | -0.3187 | 0.0052  |
| ECT2L        | 0.513 | -0.3187 | <0.0001 |
| ATP13A4-AS1  | 0.036 | -0.3186 | <0.0001 |
| TXLNGY       | 0.727 | -0.3185 | 0.0059  |
| PCCB         | 0.891 | -0.3183 | 0.0005  |
| VEPH1        | 0.794 | -0.3183 | <0.0001 |
| SPNS3        | 0.85  | -0.318  | 0.0003  |
| RN7SL861P    | 0.056 | -0.318  | <0.0001 |
| TEKT2        | 0.721 | -0.318  | <0.0001 |
| RNF128       | 0.753 | -0.318  | <0.0001 |
| DCDC1        | 0.887 | -0.3179 | 0.0037  |
| APOBEC3G     | 0.907 | -0.3178 | 0.0009  |
| MIR1234      | 0     | -0.3177 | <0.0001 |
| TCEAL2       | 0.814 | -0.3177 | <0.0001 |
| LOC100129027 | 0.179 | -0.3175 | 0.0032  |
| FASLG        | 0.817 | -0.3174 | <0.0001 |
| C14orf28     | 0.855 | -0.3173 | 0.0003  |
| VTN          | 0.88  | -0.3172 | 0.0044  |
| PBX4         | 0.75  | -0.3171 | <0.0001 |
| RRAD         | 0.812 | -0.3171 | <0.0001 |
| IRF2         | 0.925 | -0.317  | 0.002   |
| CDH5         | 0.93  | -0.3169 | 0.0028  |
| TTC21A       | 0.895 | -0.3168 | 0.003   |

|            |       |         |         |
|------------|-------|---------|---------|
| IGKV7-3    | 0     | -0.3168 | <0.0001 |
| ZNF658B    | 0.651 | -0.3167 | 0.0064  |
| LCN6       | 0.833 | -0.3166 | <0.0001 |
| GRIFIN     | 0.783 | -0.3165 | 0.0235  |
| FCMR       | 0     | -0.3165 | <0.0001 |
| DHRS7C     | 0.81  | -0.3165 | <0.0001 |
| GPR15      | 0.762 | -0.3164 | <0.0001 |
| RGPD4      | 0.868 | -0.3162 | 0.0178  |
| TRIM5      | 0.75  | -0.3161 | <0.0001 |
| SELENOW    | 0     | -0.316  | <0.0001 |
| SCYL1      | 0.683 | -0.316  | <0.0001 |
| FCAMR      | 0.706 | -0.3155 | <0.0001 |
| SNAI3      | 0.746 | -0.3154 | <0.0001 |
| ADPRM      | 0.737 | -0.3153 | 0.0023  |
| AKT3       | 0.725 | -0.3153 | <0.0001 |
| FAM169B    | 0.545 | -0.3151 | <0.0001 |
| UST        | 0.777 | -0.3151 | <0.0001 |
| ANKRD36BP2 | 0.661 | -0.3149 | 0.001   |
| TMC4       | 0.842 | -0.3148 | 0.0003  |
| RGMB       | 0.747 | -0.3147 | <0.0001 |
| MIR1266    | 0     | -0.3145 | <0.0001 |
| EPB41L5    | 0.928 | -0.3144 | 0.0031  |
| HLA-U      | 0     | -0.3143 | <0.0001 |
| STX19      | 0.792 | -0.3142 | <0.0001 |
| FYTTD1     | 0.802 | -0.3142 | <0.0001 |
| BST1       | 0.849 | -0.314  | <0.0001 |
| BACE1      | 0.857 | -0.3139 | <0.0001 |
| MIR124-2   | 0.737 | -0.3138 | 0.0344  |
| SSBP3      | 0.75  | -0.3134 | <0.0001 |
| MIR1229    | 0.503 | -0.3133 | 0.0006  |
| ADD3       | 0.873 | -0.3133 | <0.0001 |
| NUMB       | 0.937 | -0.3132 | 0.0103  |
| TPBG       | 0.882 | -0.313  | 0.0006  |



|              |       |         |         |
|--------------|-------|---------|---------|
| RASGEF1C     | 0.715 | -0.313  | <0.0001 |
| LOC729815    | 0.572 | -0.3126 | 0.0062  |
| RNU6-339P    | 0     | -0.3126 | <0.0001 |
| PKIG         | 0.855 | -0.3125 | <0.0001 |
| LOC101927550 | 0.519 | -0.3124 | 0.0196  |
| ATPAF1       | 0.633 | -0.3124 | <0.0001 |
| SLC43A3      | 0.885 | -0.3123 | 0.0007  |
| PRB2         | 0.654 | -0.3123 | <0.0001 |
| KLHL14       | 0.665 | -0.3123 | <0.0001 |
| PPP1R3G      | 0.69  | -0.3121 | 0.0028  |
| PPP1R3C      | 0.879 | -0.312  | 0.0006  |
| ELP5         | 0.637 | -0.3118 | 0.0004  |
| ACVR2B-AS1   | 0.747 | -0.3117 | 0.0132  |
| ZYG11B       | 0.789 | -0.3117 | <0.0001 |
| CCDC173      | 0.724 | -0.3114 | 0.0037  |
| RNU4-82P     | 0.353 | -0.3114 | <0.0001 |
| RSBN1        | 0.811 | -0.3114 | <0.0001 |
| TRAF6        | 0.905 | -0.3113 | 0.0034  |
| RTN4         | 0.696 | -0.3113 | <0.0001 |
| GPR132       | 0.888 | -0.311  | 0.0004  |
| MLKL         | 0.74  | -0.311  | <0.0001 |
| MIR302B      | 0     | -0.3109 | <0.0001 |
| GABRA5       | 0.843 | -0.3108 | <0.0001 |
| SPHK2        | 0.897 | -0.3107 | 0.0014  |
| CD300LG      | 0.752 | -0.3107 | <0.0001 |
| C19orf12     | 0.771 | -0.3107 | <0.0001 |
| PILRA        | 0.712 | -0.3106 | <0.0001 |
| LRP5         | 0.834 | -0.3104 | <0.0001 |
| PRDX4        | 0.881 | -0.3103 | 0.0005  |
| CBWD5        | 0.899 | -0.3103 | 0.0117  |
| CORO1A       | 0.844 | -0.3103 | <0.0001 |
| SNORD115-48  | 0     | -0.3102 | 0.0004  |
| PCDH11X      | 0.872 | -0.3102 | 0.0006  |

|            |       |         |         |
|------------|-------|---------|---------|
| WFDC2      | 0.673 | -0.3101 | <0.0001 |
| DYNLL2     | 0.781 | -0.3101 | <0.0001 |
| HIF3A      | 0.863 | -0.3101 | <0.0001 |
| SMIM2-IT1  | 0.301 | -0.31   | <0.0001 |
| GPC1       | 0.871 | -0.3099 | 0.0001  |
| ASPRV1     | 0.834 | -0.3099 | 0.0005  |
| TCTEX1D4   | 0.62  | -0.3097 | 0.0008  |
| SLC6A1     | 0.788 | -0.3097 | <0.0001 |
| FAR1       | 0.687 | -0.3096 | <0.0001 |
| ZNF853     | 0.857 | -0.3095 | 0.0157  |
| SRRM2      | 0.944 | -0.3094 | 0.0142  |
| NTRK1      | 0.672 | -0.3093 | <0.0001 |
| CCDC17     | 0.889 | -0.3092 | 0.0024  |
| DOK6       | 0.657 | -0.3092 | <0.0001 |
| IL15RA     | 0.911 | -0.3091 | 0.001   |
| PTPN21     | 0.896 | -0.3091 | 0.0011  |
| MIRLET7BHG | 0.582 | -0.309  | 0.0026  |
| FEM1AP2    | 0     | -0.309  | <0.0001 |
| TENM2      | 0.673 | -0.3089 | 0.0029  |
| SCARF2     | 0.764 | -0.3089 | <0.0001 |
| AATK       | 0.828 | -0.3089 | <0.0001 |
| FAM227B    | 0.643 | -0.3087 | 0.0011  |
| DUSP14     | 0.909 | -0.3086 | 0.0017  |
| MTCP1      | 0.952 | -0.3086 | 0.042   |
| ZNF518B    | 0.665 | -0.3085 | <0.0001 |
| SLC6A20    | 0.71  | -0.3085 | <0.0001 |
| PM20D1     | 0.774 | -0.3084 | 0.0001  |
| RN7SL704P  | 0.499 | -0.3083 | <0.0001 |
| TTY2       | 0.637 | -0.3082 | 0.0005  |
| MIR2115    | 0.243 | -0.3082 | <0.0001 |
| PATL2      | 0.625 | -0.308  | <0.0001 |
| COL28A1    | 0.761 | -0.308  | <0.0001 |
| IGSF5      | 0.781 | -0.308  | <0.0001 |

|            |       |         |         |
|------------|-------|---------|---------|
| TTN        | 0.918 | -0.3078 | 0.0032  |
| WAPL       | 0     | -0.3078 | <0.0001 |
| SELENOK    | 0     | -0.3078 | <0.0001 |
| SYN1       | 0.761 | -0.3078 | <0.0001 |
| LYSMD2     | 0.883 | -0.3076 | 0.0008  |
| NAV2-AS4   | 0.596 | -0.3076 | 0.0076  |
| MBOAT2     | 0.869 | -0.3071 | 0.0001  |
| THEG       | 0.812 | -0.3071 | <0.0001 |
| CLCN5      | 0.917 | -0.307  | 0.0019  |
| SOX7       | 0.8   | -0.3068 | <0.0001 |
| LAMB2      | 0.893 | -0.3067 | 0.0004  |
| CD55       | 0.911 | -0.3067 | 0.0014  |
| STX1B      | 0.913 | -0.3067 | 0.0064  |
| UOX        | 0.386 | -0.3067 | <0.0001 |
| CCDC42     | 0.852 | -0.3066 | 0.0002  |
| LOC158435  | 0.197 | -0.3066 | 0.0009  |
| NRN1L      | 0.939 | -0.3066 | 0.0403  |
| TRAV8-3    | 0.88  | -0.3065 | 0.0322  |
| DPYD-AS1   | 0     | -0.3065 | <0.0001 |
| PJA2       | 0.713 | -0.3065 | <0.0001 |
| HYDIN      | 0.739 | -0.3065 | <0.0001 |
| MIR378J    | 0     | -0.3064 | <0.0001 |
| ITPK1-AS1  | 0.261 | -0.3064 | <0.0001 |
| RAPGEF4    | 0.723 | -0.3064 | <0.0001 |
| FMC1       | 0     | -0.3063 | <0.0001 |
| CPEB4      | 0.776 | -0.3063 | <0.0001 |
| GNG12      | 0.871 | -0.3062 | 0.0001  |
| SMAD1      | 0.877 | -0.3061 | 0.0004  |
| ZNRF3-AS1  | 0.409 | -0.3061 | 0.006   |
| NCKAP5-IT1 | 0     | -0.3061 | <0.0001 |
| LDOC1      | 0.882 | -0.306  | 0.0002  |
| KIAA2012   | 0     | -0.306  | <0.0001 |
| MIR3187    | 0     | -0.3059 | 0.0376  |

|             |       |         |         |
|-------------|-------|---------|---------|
| ADARB2      | 0.761 | -0.3058 | <0.0001 |
| TAC1        | 0.876 | -0.3055 | 0.0005  |
| AMOT        | 0.738 | -0.3055 | <0.0001 |
| LINC01569   | 0     | -0.3054 | <0.0001 |
| CORO2B      | 0.826 | -0.3054 | <0.0001 |
| USH2A       | 0.83  | -0.3054 | <0.0001 |
| TBX5-AS1    | 0.802 | -0.3051 | 0.0417  |
| LDHAL6B     | 0.878 | -0.305  | 0.0005  |
| CCDC106     | 0.899 | -0.305  | 0.0006  |
| RGS4        | 0.893 | -0.305  | 0.0021  |
| GNLY        | 0.841 | -0.305  | <0.0001 |
| ULK2        | 0.719 | -0.3049 | <0.0001 |
| SLC2A10     | 0.804 | -0.3046 | <0.0001 |
| LINC00433   | 0     | -0.3045 | 0.0448  |
| FAM153A     | 0.848 | -0.3043 | 0.0005  |
| NLGN2       | 0.876 | -0.3043 | 0.0016  |
| KIR2DL3     | 0.875 | -0.3043 | 0.0028  |
| MIR30A      | 0.191 | -0.3043 | <0.0001 |
| CCDC8       | 0.756 | -0.3041 | <0.0001 |
| MIR335      | 0.609 | -0.304  | 0.0304  |
| SERPINA2    | 0.727 | -0.3039 | 0.0002  |
| ARHGEF9-IT1 | 0.429 | -0.3039 | <0.0001 |
| GEMIN4      | 0.653 | -0.3038 | <0.0001 |
| C17orf102   | 0.318 | -0.3036 | <0.0001 |
| MGC27382    | 0.734 | -0.3035 | 0.021   |
| WNT9A       | 0.794 | -0.3035 | <0.0001 |
| MED11       | 0.874 | -0.3033 | 0.0007  |
| FCGR2C      | 0.861 | -0.3033 | 0.0094  |
| C4A         | 0.476 | -0.3033 | <0.0001 |
| MIR372      | 0.321 | -0.3032 | <0.0001 |
| SEMA4A      | 0.765 | -0.3031 | <0.0001 |
| LOC440700   | 0     | -0.3029 | 0.0044  |
| DMRTC1      | 0.682 | -0.3028 | 0.0027  |

|              |       |         |         |
|--------------|-------|---------|---------|
| KYAT3        | 0     | -0.3028 | <0.0001 |
| SNORD9       | 0.778 | -0.3026 | 0.0073  |
| DGKE         | 0.869 | -0.3023 | 0.0002  |
| CLEC4D       | 0.883 | -0.3023 | 0.0011  |
| ZNF358       | 0.783 | -0.3023 | <0.0001 |
| APOM         | 0.787 | -0.3019 | <0.0001 |
| SYT13        | 0.832 | -0.3019 | <0.0001 |
| PLD4         | 0.866 | -0.3018 | 0.0011  |
| PPM1A        | 0.905 | -0.3018 | 0.0023  |
| DDT          | 0.916 | -0.3017 | 0.0056  |
| MIR3199-2    | 0.426 | -0.3017 | 0.0409  |
| DLEU7        | 0.9   | -0.3016 | 0.0022  |
| TMEM150C     | 0.776 | -0.3016 | 0.0023  |
| MPO          | 0.899 | -0.3015 | 0.0016  |
| DNAJA3       | 0.77  | -0.3014 | <0.0001 |
| VPS36        | 0.813 | -0.3011 | 0.0002  |
| PROX1-AS1    | 0.782 | -0.3011 | 0.0396  |
| SDHDP2       | 0     | -0.301  | <0.0001 |
| LRRC32       | 0.845 | -0.301  | <0.0001 |
| CHSY1        | 0.913 | -0.3009 | 0.0017  |
| DSG2-AS1     | 0.495 | -0.3007 | <0.0001 |
| LOC100131532 | 0.745 | -0.3005 | 0.0073  |
| LOC100507006 | 0     | -0.3005 | <0.0001 |
| LOC101929064 | 0     | -0.3005 | <0.0001 |
| DUX3         | 0.425 | -0.3004 | <0.0001 |
| MAP7D3       | 0.747 | -0.3004 | <0.0001 |
| GTF2A1L      | 0.915 | -0.3001 | 0.0188  |
| MYO1G        | 0.71  | -0.3    | <0.0001 |
| ELN          | 0.9   | -0.2999 | 0.0009  |
| TTC12        | 0.491 | -0.2999 | <0.0001 |
| P4HA1        | 0.887 | -0.2998 | 0.0009  |
| RN7SL165P    | 0.176 | -0.2997 | <0.0001 |
| LOC339874    | 0     | -0.2996 | <0.0001 |

|              |       |         |         |
|--------------|-------|---------|---------|
| MIR328       | 0.783 | -0.2995 | 0.0237  |
| SSTR1        | 0.831 | -0.2993 | 0.0001  |
| DAOA-AS1     | 0.71  | -0.2993 | 0.0063  |
| LOC101927495 | 0     | -0.2993 | <0.0001 |
| AQP1         | 0.872 | -0.2991 | 0.0004  |
| LOC392364    | 0.535 | -0.299  | 0.02    |
| GALC         | 0.884 | -0.2989 | 0.0003  |
| BTG1         | 0.875 | -0.2989 | 0.0005  |
| FNDC9        | 0.724 | -0.2987 | 0.0031  |
| CREM         | 0.92  | -0.2987 | 0.0032  |
| PDE4D        | 0.7   | -0.2987 | <0.0001 |
| MIR1288      | 0.722 | -0.2986 | 0.0119  |
| TRBV27       | 0.673 | -0.2984 | 0.0017  |
| MAPRE1P1     | 0     | -0.2983 | 0.0001  |
| PROX1        | 0.902 | -0.2983 | 0.0021  |
| MLPH         | 0.766 | -0.2982 | <0.0001 |
| NUDT9P1      | 0.655 | -0.298  | 0.0003  |
| LOC101927543 | 0     | -0.298  | <0.0001 |
| MIR373       | 0.089 | -0.298  | <0.0001 |
| LOC101929529 | 0     | -0.2979 | <0.0001 |
| RN7SL306P    | 0.49  | -0.2979 | <0.0001 |
| PUM3         | 0     | -0.2978 | <0.0001 |
| AKR1C4       | 0.839 | -0.2978 | <0.0001 |
| TAF1C        | 0.928 | -0.2977 | 0.0083  |
| SLC25A13     | 0.877 | -0.2976 | 0.0006  |
| MIR122       | 0.249 | -0.2975 | <0.0001 |
| ORAI3        | 0.935 | -0.2973 | 0.0179  |
| ADD3-AS1     | 0.791 | -0.2973 | 0.0203  |
| MIR337       | 0.127 | -0.2973 | <0.0001 |
| SEMA3E       | 0.771 | -0.2973 | <0.0001 |
| REEP5        | 0.905 | -0.2971 | 0.0027  |
| GPR17        | 0.925 | -0.2971 | 0.0034  |
| STRN3        | 0.935 | -0.2971 | 0.0112  |

|              |       |         |         |
|--------------|-------|---------|---------|
| FBXO25       | 0.507 | -0.2971 | <0.0001 |
| C11orf65     | 0.627 | -0.297  | <0.0001 |
| CYSLTR1      | 0.907 | -0.2969 | 0.0019  |
| ZAN          | 0.881 | -0.2967 | 0.0044  |
| LY75         | 0.863 | -0.2966 | 0.0003  |
| MBTPS1       | 0.897 | -0.2966 | 0.0009  |
| HOXB3        | 0.864 | -0.2965 | 0.0002  |
| KIR2DL5A     | 0.693 | -0.2965 | <0.0001 |
| ALDH7A1      | 0.921 | -0.2961 | 0.0031  |
| ZDHHC19      | 0.681 | -0.296  | <0.0001 |
| USP9Y        | 0.754 | -0.2959 | <0.0001 |
| LOC101928020 | 0.187 | -0.2956 | <0.0001 |
| XCR1         | 0.827 | -0.2954 | 0.0001  |
| DNAAF3       | 0.787 | -0.2954 | 0.0125  |
| LRP6         | 0.866 | -0.2953 | 0.0002  |
| RNF146       | 0.873 | -0.2953 | 0.001   |
| RAB44        | 0.704 | -0.2953 | 0.0366  |
| CLMN         | 0.83  | -0.2953 | <0.0001 |
| CXCL16       | 0.842 | -0.2952 | 0.0003  |
| PGLYRP1      | 0.921 | -0.2951 | 0.0077  |
| ATG10-AS1    | 0.484 | -0.2949 | <0.0001 |
| LBH          | 0.787 | -0.2949 | <0.0001 |
| CLINT1       | 0.873 | -0.2948 | 0.0003  |
| XCL2         | 0.729 | -0.2948 | 0.0006  |
| RASL10A      | 0.941 | -0.2948 | 0.0203  |
| RNF225       | 0.491 | -0.2948 | <0.0001 |
| PRRT1        | 0.781 | -0.2946 | 0.0004  |
| TPP2         | 0.884 | -0.2946 | 0.0017  |
| SEZ6L        | 0.905 | -0.2946 | 0.0026  |
| RIMBP2       | 0.643 | -0.2945 | <0.0001 |
| GALM         | 0.792 | -0.2944 | <0.0001 |
| UBE2G2       | 0.914 | -0.2943 | 0.0057  |
| VN2R10P      | 0.279 | -0.2941 | 0.0001  |

|           |       |         |         |
|-----------|-------|---------|---------|
| ADRA2A    | 0.755 | -0.2941 | <0.0001 |
| NPIPB15   | 0.772 | -0.294  | 0.0162  |
| RN7SL218P | 0     | -0.294  | <0.0001 |
| PDE4DIP   | 0.788 | -0.294  | <0.0001 |
| PDXDC1    | 0.931 | -0.2939 | 0.0253  |
| TSPYL2    | 0.92  | -0.2938 | 0.0059  |
| LINC01354 | 0.22  | -0.2936 | <0.0001 |
| PPARA     | 0.924 | -0.2935 | 0.0075  |
| GCFC2     | 0.54  | -0.2935 | <0.0001 |
| ELL2      | 0.912 | -0.2933 | 0.0021  |
| COL23A1   | 0.837 | -0.2932 | 0.0002  |
| SYNDIG1L  | 0.749 | -0.2932 | 0.0036  |
| KRT72     | 0.851 | -0.293  | 0.0003  |
| MIR208B   | 0     | -0.293  | <0.0001 |
| GTF2F2P1  | 0     | -0.2929 | 0.0001  |
| ARL5B     | 0.845 | -0.2929 | 0.0005  |
| STX8      | 0.912 | -0.2928 | 0.0046  |
| MIR1197   | 0     | -0.2927 | <0.0001 |
| PHF2      | 0.8   | -0.2927 | <0.0001 |
| AGBL2     | 0.889 | -0.2926 | 0.001   |
| SLC22A24  | 0.804 | -0.2926 | 0.0011  |
| BCL3      | 0.929 | -0.2926 | 0.0135  |
| FAM124A   | 0.855 | -0.2925 | 0.0004  |
| USF2      | 0.934 | -0.2925 | 0.0116  |
| RBMS3-AS2 | 0.464 | -0.2925 | <0.0001 |
| USP25     | 0.794 | -0.2925 | <0.0001 |
| CRX       | 0.815 | -0.2924 | <0.0001 |
| RFPL2     | 0.843 | -0.2923 | 0.0008  |
| AGER      | 0.92  | -0.2923 | 0.0032  |
| LRIT3     | 0.885 | -0.2922 | 0.0057  |
| DDI2      | 0.862 | -0.2922 | 0.006   |
| ZRANB1    | 0.798 | -0.2921 | 0.0002  |
| CARD16    | 0.865 | -0.2921 | 0.0034  |



|              |       |         |         |
|--------------|-------|---------|---------|
| NT5C1B       | 0.886 | -0.2921 | 0.0124  |
| RPGRIP1      | 0.733 | -0.2918 | <0.0001 |
| VIPR2        | 0.897 | -0.2917 | 0.002   |
| C20orf203    | 0.709 | -0.2917 | 0.0048  |
| MIR2053      | 0.353 | -0.2917 | <0.0001 |
| LOC100287010 | 0     | -0.2916 | 0.0004  |
| NFKB1        | 0.898 | -0.2916 | 0.0033  |
| TM7SF3       | 0.757 | -0.2915 | <0.0001 |
| ITIH3        | 0.874 | -0.2913 | 0.0006  |
| CHD2         | 0.925 | -0.2913 | 0.0065  |
| UBB          | 0.942 | -0.291  | 0.0305  |
| ADIPOQ-AS1   | 0     | -0.291  | <0.0001 |
| PHF8         | 0.87  | -0.2908 | 0.0008  |
| LINC00319    | 0.633 | -0.2908 | 0.0043  |
| MIR369       | 0.799 | -0.2908 | 0.036   |
| C3AR1        | 0.915 | -0.2907 | 0.0031  |
| OR7E2P       | 0.589 | -0.2906 | 0.0014  |
| EZR          | 0.865 | -0.2906 | 0.002   |
| TAF7L        | 0.829 | -0.2905 | 0.0002  |
| RNA5SP117    | 0.471 | -0.2905 | 0.0186  |
| GPRC5C       | 0.845 | -0.2904 | 0.0001  |
| RIOK3        | 0.901 | -0.2904 | 0.0026  |
| MUC5AC       | 0.841 | -0.2902 | 0.0015  |
| MIR124-2HG   | 0.595 | -0.2902 | 0.0049  |
| GOLGA6D      | 0.624 | -0.2901 | 0.0118  |
| EMX2OS       | 0.88  | -0.29   | 0.0211  |
| GOLGA8IP     | 0.364 | -0.29   | <0.0001 |
| GAB1         | 0.832 | -0.29   | <0.0001 |
| ANXA6        | 0.863 | -0.2899 | 0.0002  |
| TSG1         | 0.496 | -0.2898 | 0.0036  |
| FAM209B      | 0.866 | -0.2898 | 0.0346  |
| SLTM         | 0.819 | -0.2896 | 0.0001  |
| PISD         | 0.855 | -0.2896 | 0.0036  |

|           |       |         |         |
|-----------|-------|---------|---------|
| FPR3      | 0.937 | -0.2892 | 0.0243  |
| EPCAM     | 0.939 | -0.2892 | 0.0315  |
| TMEM235   | 0.806 | -0.2891 | 0.0294  |
| HACD1     | 0     | -0.2891 | <0.0001 |
| ITGB5-AS1 | 0     | -0.2891 | <0.0001 |
| DDX25     | 0.593 | -0.2891 | <0.0001 |
| RXFP2     | 0.396 | -0.2887 | <0.0001 |
| SMTNL1    | 0.838 | -0.2886 | 0.0016  |
| SEMA3D    | 0.839 | -0.2885 | 0.0003  |
| GHRLOS    | 0.714 | -0.2885 | 0.0028  |
| C12orf71  | 0.757 | -0.2883 | 0.0042  |
| MYO3A     | 0.871 | -0.2882 | 0.0013  |
| KAT8      | 0.6   | -0.2881 | 0.0001  |
| NACAD     | 0.782 | -0.2881 | 0.0002  |
| ST8SIA4   | 0.891 | -0.288  | 0.0026  |
| MESTIT1   | 0.245 | -0.288  | <0.0001 |
| PLLP      | 0.752 | -0.288  | <0.0001 |
| KIRREL3   | 0.813 | -0.288  | <0.0001 |
| PKD2      | 0.893 | -0.2878 | 0.0019  |
| OMD       | 0.868 | -0.2877 | 0.0006  |
| MKNK1     | 0.921 | -0.2877 | 0.0086  |
| OR52L2P   | 0.019 | -0.2877 | <0.0001 |
| BIN3      | 0.793 | -0.2877 | <0.0001 |
| MIR183    | 0.384 | -0.2876 | <0.0001 |
| TMEM106A  | 0.73  | -0.2875 | <0.0001 |
| F2R       | 0.907 | -0.2873 | 0.0022  |
| RPL31P52  | 0.39  | -0.2871 | 0.0002  |
| RPH3A     | 0.865 | -0.287  | 0.0008  |
| MIR1251   | 0     | -0.287  | <0.0001 |
| GOLGA6L6  | 0.591 | -0.2869 | 0.0016  |
| TTLL8     | 0.79  | -0.2866 | 0.0138  |
| HEMGN     | 0.676 | -0.2866 | <0.0001 |
| ZNF885P   | 0     | -0.2865 | 0.0002  |

|            |       |         |         |
|------------|-------|---------|---------|
| CXCL3      | 0.877 | -0.2865 | 0.0005  |
| DTX4       | 0.882 | -0.2865 | 0.001   |
| HAS1       | 0.858 | -0.2864 | 0.0002  |
| CEACAM1    | 0.878 | -0.2864 | 0.0005  |
| RAB2B      | 0.914 | -0.2864 | 0.0134  |
| LIMD2      | 0.83  | -0.2864 | <0.0001 |
| IFNL2      | 0.782 | -0.2863 | 0.0287  |
| GLI2       | 0.863 | -0.2862 | 0.0002  |
| MIR181A1HG | 0.1   | -0.2861 | <0.0001 |
| SHH        | 0.857 | -0.286  | 0.0007  |
| SPDYE4     | 0.641 | -0.286  | 0.0013  |
| CADM2      | 0.813 | -0.2858 | 0.0001  |
| HOXB2      | 0.889 | -0.2856 | 0.0008  |
| VPS9D1-AS1 | 0.62  | -0.2853 | 0.0209  |
| MIR184     | 0.198 | -0.2852 | <0.0001 |
| IFNA20P    | 0     | -0.2851 | 0.0002  |
| JAM2       | 0.86  | -0.2851 | 0.0004  |
| IL13RA1    | 0.901 | -0.2849 | 0.0016  |
| RBPMS-AS1  | 0.635 | -0.2849 | 0.0191  |
| PNPLA2     | 0.773 | -0.2849 | <0.0001 |
| EMP3       | 0.885 | -0.2848 | 0.0007  |
| NXPE3      | 0.696 | -0.2845 | 0.0024  |
| LOC375196  | 0.525 | -0.2845 | 0.0183  |
| MIR1911    | 0.438 | -0.2845 | <0.0001 |
| L3MBTL4    | 0.782 | -0.2845 | <0.0001 |
| RNA5SP37   | 0.459 | -0.2844 | <0.0001 |
| ENC1       | 0.855 | -0.2843 | 0.0002  |
| RNY3P10    | 0     | -0.2843 | 0.0209  |
| RN7SL869P  | 0     | -0.2842 | <0.0001 |
| NAGLU      | 0.905 | -0.2841 | 0.0038  |
| DEFA11P    | 0.655 | -0.2839 | 0.0293  |
| IGSF11-AS1 | 0.709 | -0.2838 | 0.0232  |
| ITIH5      | 0.837 | -0.2838 | <0.0001 |

|              |       |         |         |
|--------------|-------|---------|---------|
| SNX20        | 0.884 | -0.2837 | 0.0104  |
| BTLA         | 0.82  | -0.2836 | 0.0002  |
| LOC100288866 | 0     | -0.2836 | 0.0006  |
| CXorf65      | 0.833 | -0.2836 | 0.0022  |
| RN7SL749P    | 0.256 | -0.2836 | <0.0001 |
| ATAD1        | 0.773 | -0.2836 | <0.0001 |
| ZNF470       | 0.772 | -0.2834 | 0.0002  |
| SLC25A48     | 0.68  | -0.2834 | 0.0007  |
| SLC30A1      | 0.908 | -0.2834 | 0.0046  |
| LMO2         | 0.916 | -0.2832 | 0.0034  |
| ZDHHC11      | 0.831 | -0.2831 | 0.0004  |
| HLA-DPB1     | 0.942 | -0.2829 | 0.0148  |
| ZNF439       | 0.579 | -0.2829 | <0.0001 |
| ACOT4        | 0.685 | -0.2829 | <0.0001 |
| IGSF6        | 0.939 | -0.2828 | 0.0118  |
| MIR1324      | 0     | -0.2828 | <0.0001 |
| MIR216A      | 0.709 | -0.2826 | 0.0087  |
| DNAJC27      | 0.911 | -0.2826 | 0.016   |
| NDN          | 0.88  | -0.2825 | 0.0014  |
| PPIL4        | 0.853 | -0.2824 | 0.0019  |
| GLIS3-AS1    | 0.829 | -0.2824 | 0.0355  |
| PLPP6        | 0     | -0.2822 | 0.0002  |
| GBE1         | 0.864 | -0.282  | 0.0003  |
| SYK          | 0.887 | -0.282  | 0.002   |
| CARMIL2      | 0     | -0.2819 | 0.0002  |
| FAM166A      | 0.846 | -0.2819 | 0.0024  |
| JUND         | 0.9   | -0.2818 | 0.0017  |
| LOC101927870 | 0.285 | -0.2818 | <0.0001 |
| SPATA2L      | 0.787 | -0.2817 | 0.0001  |
| CCDC144B     | 0.83  | -0.2816 | 0.0435  |
| DIO3         | 0.612 | -0.2815 | <0.0001 |
| SH2D2A       | 0.885 | -0.2814 | 0.0017  |
| GATA3-AS1    | 0.65  | -0.2814 | 0.0064  |

|              |       |         |         |
|--------------|-------|---------|---------|
| ZNF582-AS1   | 0.391 | -0.2813 | <0.0001 |
| WDR81        | 0.73  | -0.2813 | <0.0001 |
| NEK1         | 0.71  | -0.2812 | <0.0001 |
| OR2A7        | 0.583 | -0.2811 | 0.0004  |
| KIR2DS5      | 0.835 | -0.281  | 0.0048  |
| LIPJ         | 0.721 | -0.281  | <0.0001 |
| PTEN         | 0.904 | -0.2809 | 0.0044  |
| MIR1289-2    | 0.639 | -0.2809 | 0.0052  |
| TLR6         | 0.66  | -0.2809 | <0.0001 |
| CRNN         | 0.921 | -0.2808 | 0.0076  |
| MIR181A2     | 0.737 | -0.2808 | 0.0136  |
| ACOT6        | 0.785 | -0.2808 | <0.0001 |
| FOXI3        | 0.711 | -0.2807 | 0.0028  |
| ARL6IP1      | 0.766 | -0.2807 | <0.0001 |
| TMEM242      | 0.658 | -0.28   | 0.0019  |
| INHBE        | 0.806 | -0.2799 | <0.0001 |
| RNU2-33P     | 0.384 | -0.2798 | 0.0001  |
| PCP2         | 0.77  | -0.2797 | 0.0001  |
| CDC42EP3     | 0.89  | -0.2797 | 0.0011  |
| PPP4R1L      | 0.84  | -0.2796 | 0.0086  |
| CRYZ         | 0.847 | -0.2795 | 0.0002  |
| C4B          | 0.641 | -0.2794 | 0.0001  |
| SNORD3D      | 0     | -0.2794 | 0.0142  |
| LOC100133077 | 0.295 | -0.2794 | 0.0166  |
| AFMID        | 0.848 | -0.2793 | 0.0008  |
| TAS2R60      | 0.62  | -0.2793 | <0.0001 |
| CTSS         | 0.903 | -0.2792 | 0.0023  |
| LARP4        | 0.799 | -0.2792 | <0.0001 |
| ND6          | 0.584 | -0.2791 | 0.0261  |
| ESRP1        | 0.85  | -0.279  | 0.0067  |
| PDE6G        | 0.924 | -0.2789 | 0.0144  |
| MAPT-IT1     | 0     | -0.2789 | <0.0001 |
| CBARP        | 0.419 | -0.2788 | 0.0002  |

|           |       |         |         |
|-----------|-------|---------|---------|
| PHF10     | 0.914 | -0.2788 | 0.0068  |
| CD177P1   | 0     | -0.2785 | 0.0001  |
| CYLC1     | 0.714 | -0.2785 | <0.0001 |
| P2RX6     | 0.716 | -0.2783 | 0.0001  |
| MIRLET7F2 | 0.317 | -0.2783 | 0.0027  |
| GSTM1     | 0.848 | -0.2781 | 0.0009  |
| RNF138    | 0.881 | -0.2781 | 0.0024  |
| CST3      | 0.912 | -0.2781 | 0.0035  |
| RBMS2     | 0.659 | -0.2781 | <0.0001 |
| MIAT      | 0.782 | -0.278  | 0.0026  |
| MIR2113   | 0     | -0.278  | <0.0001 |
| ZSCAN18   | 0.828 | -0.2779 | 0.0005  |
| ARMCX6    | 0.871 | -0.2779 | 0.0016  |
| RN7SL629P | 0     | -0.2778 | 0.0001  |
| DPEP3     | 0.764 | -0.2778 | <0.0001 |
| SHPRH     | 0.747 | -0.2774 | <0.0001 |
| APOB      | 0.886 | -0.2773 | 0.0017  |
| ARHGAP23  | 0.869 | -0.2773 | 0.0082  |
| TDRD9     | 0.671 | -0.2773 | <0.0001 |
| EDAR      | 0.723 | -0.2773 | <0.0001 |
| SLFN13    | 0.776 | -0.2772 | 0.0002  |
| TFF2      | 0.683 | -0.2771 | <0.0001 |
| DUX4L26   | 0     | -0.277  | 0.0001  |
| NPIP9     | 0     | -0.277  | <0.0001 |
| KLHL6     | 0.748 | -0.277  | <0.0001 |
| CLCA3P    | 0.622 | -0.2768 | 0.0002  |
| SMAD9-IT1 | 0.409 | -0.2768 | 0.0004  |
| MIR142    | 0.466 | -0.2768 | <0.0001 |
| FSTL1     | 0.856 | -0.2766 | 0.0003  |
| C2CD2     | 0.747 | -0.2766 | <0.0001 |
| ARPP21    | 0.634 | -0.2764 | <0.0001 |
| ZPBP      | 0.713 | -0.2764 | <0.0001 |
| C2orf27B  | 0.739 | -0.2763 | 0.0179  |

|              |       |         |         |
|--------------|-------|---------|---------|
| DACT2        | 0.53  | -0.2763 | <0.0001 |
| LOC202181    | 0.335 | -0.2762 | <0.0001 |
| GCC2         | 0.756 | -0.2761 | <0.0001 |
| LOC441179    | 0     | -0.2759 | <0.0001 |
| COG3         | 0.87  | -0.2756 | 0.0022  |
| ARSJ         | 0.705 | -0.2756 | <0.0001 |
| BLCAP        | 0.842 | -0.2755 | 0.0002  |
| NR2F2        | 0.87  | -0.2753 | 0.0014  |
| TAF9BP2      | 0     | -0.2752 | 0.0004  |
| KCNS3        | 0.88  | -0.2752 | 0.0008  |
| SPDYC        | 0.649 | -0.2751 | <0.0001 |
| MMP2         | 0.838 | -0.275  | 0.0005  |
| FKRP         | 0.913 | -0.2749 | 0.005   |
| AWAT2        | 0.545 | -0.2748 | <0.0001 |
| MTND5P2      | 0     | -0.2746 | 0.0004  |
| IL20RA       | 0.706 | -0.2745 | <0.0001 |
| PSG10P       | 0.395 | -0.2744 | <0.0001 |
| RNA5SP416    | 0.233 | -0.2743 | 0.026   |
| IGF2-AS      | 0.844 | -0.2743 | 0.0362  |
| DHRS3        | 0.866 | -0.2742 | 0.0006  |
| UBE2G1       | 0.91  | -0.2742 | 0.0065  |
| LOC101927069 | 0     | -0.2742 | <0.0001 |
| MIR651       | 0     | -0.2741 | 0.0131  |
| TEX33        | 0.698 | -0.274  | 0.0115  |
| TAPBPL       | 0.763 | -0.2739 | <0.0001 |
| CSRNP3       | 0.781 | -0.2737 | 0.0003  |
| LOC286238    | 0.545 | -0.2737 | 0.0004  |
| PNOC         | 0.871 | -0.2737 | 0.0011  |
| ABCC11       | 0.681 | -0.2737 | <0.0001 |
| PRB1         | 0.612 | -0.2736 | <0.0001 |
| OR13C3       | 0.804 | -0.2735 | 0.0035  |
| LINC00582    | 0.509 | -0.2734 | 0.0034  |
| MYO16-AS2    | 0     | -0.2733 | 0.0001  |

|             |       |         |         |
|-------------|-------|---------|---------|
| VTI1BP2     | 0.359 | -0.2733 | 0.0001  |
| OR4F4       | 0.646 | -0.2733 | 0.0068  |
| MIR216B     | 0     | -0.2732 | <0.0001 |
| KLF3-AS1    | 0.295 | -0.2731 | <0.0001 |
| ARHGDIB     | 0.92  | -0.273  | 0.0061  |
| MIR133B     | 0     | -0.273  | <0.0001 |
| KIAA0825    | 0.473 | -0.2728 | <0.0001 |
| PYGO1       | 0.729 | -0.2728 | <0.0001 |
| RN7SL589P   | 0.082 | -0.2726 | 0.0002  |
| TP53I13     | 0.844 | -0.2725 | 0.0019  |
| DYNC2H1     | 0.848 | -0.2723 | 0.0005  |
| HSFX2       | 0.575 | -0.2723 | 0.0212  |
| STAG3       | 0.795 | -0.2722 | 0.0003  |
| IGLL1       | 0.921 | -0.2722 | 0.0076  |
| MYO1E       | 0.868 | -0.272  | 0.0013  |
| RNASE13     | 0.846 | -0.272  | 0.0077  |
| HVCN1       | 0.925 | -0.272  | 0.0149  |
| LINC00330   | 0.669 | -0.272  | 0.0183  |
| PLTP        | 0.799 | -0.2719 | 0.0002  |
| CDC14C      | 0.803 | -0.2719 | 0.0055  |
| BLVRB       | 0.926 | -0.2718 | 0.0088  |
| BHLHE40-AS1 | 0.255 | -0.2717 | 0.0001  |
| DEFB119     | 0.872 | -0.2717 | 0.0051  |
| SMLR1       | 0.296 | -0.2717 | <0.0001 |
| TRIM2       | 0.867 | -0.2715 | 0.0012  |
| WTIP        | 0.775 | -0.2714 | 0.0004  |
| FERMT3      | 0.816 | -0.2711 | 0.0008  |
| SFTA2       | 0.555 | -0.2711 | <0.0001 |
| ITGA1       | 0.913 | -0.2709 | 0.0074  |
| BIRC2       | 0.939 | -0.2709 | 0.0159  |
| LINC00442   | 0.509 | -0.2709 | 0.0307  |
| ROBO4       | 0.892 | -0.2707 | 0.0044  |
| ARL4C       | 0.925 | -0.2706 | 0.0083  |



|              |       |         |         |
|--------------|-------|---------|---------|
| EPHB6        | 0.832 | -0.2705 | 0.0001  |
| KANK3        | 0.801 | -0.2703 | 0.0006  |
| IFIT2        | 0.902 | -0.2703 | 0.0027  |
| CDH4         | 0.858 | -0.2702 | 0.0003  |
| F2RL2        | 0.884 | -0.2702 | 0.0012  |
| PLK2         | 0.902 | -0.2702 | 0.0051  |
| TIGIT        | 0.841 | -0.27   | 0.0068  |
| PWAR5        | 0.744 | -0.27   | 0.0369  |
| TUSC3        | 0.83  | -0.2699 | 0.0003  |
| LINC00837    | 0.693 | -0.2699 | 0.0121  |
| ZNF10        | 0.904 | -0.2698 | 0.0095  |
| RN7SL67P     | 0     | -0.2696 | 0.0002  |
| SCN1B        | 0.851 | -0.2696 | 0.0007  |
| MIR7515HG    | 0     | -0.2693 | 0.0004  |
| MIR33B       | 0.688 | -0.2693 | 0.0184  |
| OR51A1P      | 0     | -0.2692 | 0.0002  |
| STK17B       | 0.881 | -0.2692 | 0.0025  |
| PIGY         | 0.757 | -0.2692 | 0.0058  |
| FKBP7        | 0.737 | -0.2692 | <0.0001 |
| CRYBB3       | 0.772 | -0.2691 | <0.0001 |
| ASB18        | 0.6   | -0.269  | <0.0001 |
| GAPDHP47     | 0.036 | -0.2689 | 0.0005  |
| LINC00629    | 0.635 | -0.2689 | 0.0141  |
| LOC100507642 | 0.223 | -0.2685 | <0.0001 |
| KIF17        | 0.75  | -0.2685 | <0.0001 |
| LINC00243    | 0.445 | -0.2684 | 0.0001  |
| SNORD8       | 0.864 | -0.2683 | 0.0182  |
| ZNF586       | 0.771 | -0.2683 | <0.0001 |
| GRM6         | 0.795 | -0.2682 | <0.0001 |
| DDX3X        | 0.93  | -0.2681 | 0.0112  |
| C18orf12     | 0.06  | -0.2681 | <0.0001 |
| SCARB2       | 0.907 | -0.268  | 0.0067  |
| ATP2A3       | 0.857 | -0.2679 | 0.0004  |

|           |       |         |         |
|-----------|-------|---------|---------|
| LYPD6B    | 0.73  | -0.2678 | 0.0001  |
| LOC646626 | 0.266 | -0.2678 | <0.0001 |
| FAM187B   | 0.831 | -0.2676 | 0.003   |
| GSTT2     | 0.864 | -0.2676 | 0.0045  |
| OR51J1    | 0     | -0.2676 | <0.0001 |
| TMPRSS4   | 0.803 | -0.2674 | 0.0002  |
| LINC01219 | 0     | -0.2674 | 0.0005  |
| EPB42     | 0.881 | -0.2674 | 0.0013  |
| RN7SL452P | 0.135 | -0.2673 | 0.0002  |
| CYP4F11   | 0.837 | -0.2673 | 0.0003  |
| CSDC2     | 0.905 | -0.2672 | 0.0034  |
| MIR27A    | 0.819 | -0.2671 | 0.0466  |
| CHI3L1    | 0.819 | -0.267  | 0.0001  |
| TMEM156   | 0.817 | -0.267  | 0.0004  |
| ABCG4     | 0.842 | -0.2669 | 0.0003  |
| ANKRD63   | 0.207 | -0.2668 | <0.0001 |
| MIR24-2   | 0.444 | -0.2668 | <0.0001 |
| TRDV3     | 0.763 | -0.2667 | 0.0226  |
| LINC00670 | 0     | -0.2667 | <0.0001 |
| MIR1243   | 0.038 | -0.2667 | <0.0001 |
| RNU6-526P | 0.464 | -0.2662 | 0.0002  |
| ZNF596    | 0.903 | -0.266  | 0.0147  |
| SRPX2     | 0.784 | -0.266  | <0.0001 |
| MCOLN2    | 0.791 | -0.2659 | 0.0002  |
| ITIH2     | 0.9   | -0.2659 | 0.0046  |
| SLC25A38  | 0.886 | -0.2659 | 0.0051  |
| MIR29A    | 0.536 | -0.2659 | 0.0179  |
| ITGA10    | 0.868 | -0.2658 | 0.001   |
| PPEF2     | 0.808 | -0.2657 | 0.0003  |
| USP17L15  | 0.321 | -0.2657 | 0.0128  |
| OR2F1     | 0.782 | -0.2656 | 0.0002  |
| RBBP6     | 0.94  | -0.2652 | 0.0294  |
| AGAP11    | 0.803 | -0.2651 | 0.0171  |

|              |       |         |         |
|--------------|-------|---------|---------|
| LTC4S        | 0.86  | -0.265  | 0.0009  |
| TARSL2       | 0.636 | -0.265  | <0.0001 |
| LDHB         | 0.863 | -0.2649 | 0.0006  |
| ZNF879       | 0.581 | -0.2648 | 0.0002  |
| CHRNB1       | 0.932 | -0.2647 | 0.0148  |
| WBP1LP1      | 0     | -0.2646 | 0.0006  |
| RFPL3        | 0.69  | -0.2646 | <0.0001 |
| SAMD9L       | 0.66  | -0.2643 | <0.0001 |
| LOC101928844 | 0     | -0.2641 | <0.0001 |
| YBX3         | 0.513 | -0.264  | 0.0004  |
| CDH26        | 0.688 | -0.264  | <0.0001 |
| CFHR5        | 0.809 | -0.2639 | 0.0001  |
| SWSAP1       | 0.657 | -0.2638 | 0.0038  |
| TFEC         | 0.73  | -0.2636 | <0.0001 |
| FAM166B      | 0.81  | -0.2635 | 0.0023  |
| ARRDC1       | 0.898 | -0.2635 | 0.0073  |
| CPNE6        | 0.727 | -0.2634 | <0.0001 |
| ELANE        | 0.861 | -0.2633 | 0.0034  |
| CYAT1        | 0.343 | -0.2631 | <0.0001 |
| LMBR1L       | 0.809 | -0.2629 | 0.0003  |
| AUH          | 0.879 | -0.2629 | 0.0014  |
| UGT2B28      | 0.937 | -0.2629 | 0.0339  |
| PRKY         | 0.734 | -0.2627 | 0.0001  |
| GLIS1        | 0.794 | -0.2627 | 0.0003  |
| RN7SL767P    | 0.24  | -0.2627 | 0.0008  |
| MIR1302-7    | 0.616 | -0.2627 | 0.0109  |
| NDUFC1       | 0.902 | -0.2626 | 0.0069  |
| C5orf56      | 0.584 | -0.2625 | 0.0014  |
| MIR135B      | 0     | -0.2623 | <0.0001 |
| KRTAP27-1    | 0.611 | -0.2622 | 0.0002  |
| BCRP8        | 0     | -0.2621 | 0.0002  |
| OR2A13P      | 0     | -0.2621 | 0.0007  |
| CDC40        | 0.821 | -0.262  | 0.0002  |

|              |       |         |         |
|--------------|-------|---------|---------|
| PEPD         | 0.847 | -0.262  | 0.0009  |
| EVI5         | 0.851 | -0.2619 | 0.0008  |
| HECW2        | 0.841 | -0.2619 | 0.0014  |
| EEF1DP3      | 0.558 | -0.2619 | 0.0048  |
| MIR100       | 0     | -0.2618 | <0.0001 |
| GSTO1        | 0.883 | -0.2616 | 0.0026  |
| MIR1264      | 0     | -0.2616 | <0.0001 |
| LOC100132215 | 0.365 | -0.2616 | <0.0001 |
| PPP1R14A     | 0.712 | -0.2616 | <0.0001 |
| MIR139       | 0.408 | -0.2614 | <0.0001 |
| MIR654       | 0.169 | -0.2612 | 0.018   |
| TWIST2       | 0.807 | -0.2611 | 0.0029  |
| LRRC40       | 0.801 | -0.261  | 0.0001  |
| KC6          | 0     | -0.261  | <0.0001 |
| OXSM         | 0.788 | -0.2609 | 0.0002  |
| AMOTL1       | 0.791 | -0.2609 | 0.0003  |
| TOPORS       | 0.836 | -0.2609 | 0.0013  |
| LINC01578    | 0     | -0.2608 | 0.0008  |
| MEGF6        | 0.676 | -0.2607 | <0.0001 |
| GIMAP2       | 0.798 | -0.2606 | 0.0003  |
| TCP10L       | 0.722 | -0.2604 | 0.0001  |
| RNU6-1250P   | 0.133 | -0.2601 | 0.0003  |
| REG1CP       | 0     | -0.2601 | 0.0006  |
| CABP2        | 0.611 | -0.2601 | <0.0001 |
| TRY2P        | 0     | -0.26   | <0.0001 |
| DCTN1-AS1    | 0.735 | -0.2599 | 0.0458  |
| ANKRD18A     | 0.821 | -0.2595 | 0.0012  |
| SPOCK2       | 0.913 | -0.2592 | 0.0123  |
| KRBOX1-AS1   | 0     | -0.2592 | <0.0001 |
| PARP15       | 0.882 | -0.2587 | 0.0087  |
| LINC00707    | 0     | -0.2586 | 0.0002  |
| TMEM129      | 0.827 | -0.2586 | 0.0018  |
| TLE2         | 0.89  | -0.2586 | 0.0047  |

|              |       |         |         |
|--------------|-------|---------|---------|
| CEBPB        | 0.907 | -0.2586 | 0.0052  |
| CD2          | 0.873 | -0.2585 | 0.0013  |
| LOC100287467 | 0.421 | -0.2584 | 0.007   |
| CLNK         | 0.593 | -0.2584 | <0.0001 |
| LTB4R2       | 0.865 | -0.2583 | 0.0011  |
| NCF4         | 0.872 | -0.2583 | 0.004   |
| ITGA4        | 0.899 | -0.2583 | 0.0052  |
| ASTN1        | 0.754 | -0.2583 | <0.0001 |
| PRDX3        | 0.892 | -0.2582 | 0.0053  |
| MAPRE2       | 0.92  | -0.2581 | 0.0105  |
| CXCL1        | 0.865 | -0.258  | 0.001   |
| PAOX         | 0.758 | -0.2579 | 0.0001  |
| KRTAP10-9    | 0.781 | -0.2579 | 0.0015  |
| HLA-DRB3     | 0.685 | -0.2579 | 0.0036  |
| FAM83B       | 0.741 | -0.2579 | <0.0001 |
| MIR6826      | 0     | -0.2578 | 0.001   |
| PGR          | 0.64  | -0.2578 | <0.0001 |
| RND2         | 0.889 | -0.2577 | 0.0051  |
| CCDC89       | 0.746 | -0.2577 | <0.0001 |
| RN7SL309P    | 0.26  | -0.2576 | 0.0003  |
| SPAG11B      | 0.786 | -0.2576 | 0.0097  |
| GOLGA2P9     | 0     | -0.2575 | 0.0002  |
| ZNF141       | 0.908 | -0.2575 | 0.0125  |
| AK2          | 0.823 | -0.2574 | 0.0003  |
| PINLYP       | 0.838 | -0.2574 | 0.0389  |
| OR13C9       | 0.569 | -0.2573 | <0.0001 |
| TMEM123      | 0.748 | -0.2573 | <0.0001 |
| SIGLEC6      | 0.756 | -0.2569 | <0.0001 |
| ST8SIA3      | 0.705 | -0.2568 | <0.0001 |
| FAM25G       | 0.612 | -0.2567 | 0.0044  |
| ENDOU        | 0.771 | -0.2566 | 0.0023  |
| MIR154       | 0     | -0.2566 | <0.0001 |
| OSMR         | 0.852 | -0.2563 | 0.0016  |

|              |       |         |         |
|--------------|-------|---------|---------|
| KRTAP10-3    | 0.757 | -0.2562 | 0.0012  |
| CD37         | 0.873 | -0.2562 | 0.0015  |
| MIR520H      | 0.129 | -0.2562 | 0.025   |
| RSPO1        | 0.795 | -0.2561 | 0.0011  |
| OR1B1        | 0.49  | -0.2561 | <0.0001 |
| CD72         | 0.842 | -0.2559 | 0.0004  |
| MIR504       | 0.303 | -0.2558 | 0.0101  |
| USP44        | 0.645 | -0.2556 | <0.0001 |
| RN7SKP235    | 0.055 | -0.2555 | 0.0003  |
| CASP7        | 0.905 | -0.2555 | 0.0053  |
| MIR205       | 0.416 | -0.2554 | <0.0001 |
| MAML2        | 0.868 | -0.2553 | 0.0038  |
| MIR137       | 0.171 | -0.2553 | <0.0001 |
| FAM189A1     | 0.655 | -0.2553 | <0.0001 |
| LINC01474    | 0.389 | -0.2552 | 0.0009  |
| MIR212       | 0.619 | -0.2552 | 0.0068  |
| TEX36-AS1    | 0     | -0.255  | <0.0001 |
| ILVBL        | 0.888 | -0.2549 | 0.0028  |
| C4orf36      | 0.873 | -0.2548 | 0.0058  |
| LOC100288162 | 0     | -0.2548 | 0.0064  |
| MYO18A       | 0.909 | -0.2548 | 0.0395  |
| MIR1321      | 0.08  | -0.2548 | <0.0001 |
| PIGQ         | 0.818 | -0.2546 | 0.0006  |
| PLEKHG3      | 0.811 | -0.2545 | 0.0007  |
| GRIK1        | 0.891 | -0.2545 | 0.0033  |
| TTN-AS1      | 0     | -0.2545 | <0.0001 |
| NXF4         | 0.559 | -0.2544 | 0.0007  |
| BTG2         | 0.895 | -0.2544 | 0.0037  |
| C16orf47     | 0.771 | -0.2544 | 0.0151  |
| SLC11A1      | 0.904 | -0.2543 | 0.0084  |
| PRRG1        | 0.902 | -0.2542 | 0.0098  |
| ARHGEF33     | 0.63  | -0.2541 | 0.0011  |
| IL36RN       | 0.295 | -0.2541 | <0.0001 |

|              |       |         |         |
|--------------|-------|---------|---------|
| CUTC         | 0.688 | -0.254  | <0.0001 |
| GTF2E2       | 0.851 | -0.2539 | 0.0007  |
| CHSY3        | 0.8   | -0.2539 | 0.0013  |
| LOC100506639 | 0.382 | -0.2539 | <0.0001 |
| RN7SL449P    | 0     | -0.2538 | 0.0004  |
| GCNT1        | 0.861 | -0.2538 | 0.001   |
| LOC256880    | 0.446 | -0.2538 | 0.0133  |
| FAM47B       | 0.41  | -0.2537 | <0.0001 |
| RN7SKP56     | 0     | -0.2536 | 0.0004  |
| TNRC6C       | 0.84  | -0.2536 | 0.0031  |
| RNY4P29      | 0     | -0.2536 | 0.0396  |
| ADAMTS8      | 0.769 | -0.2536 | <0.0001 |
| INF2         | 0.892 | -0.2535 | 0.01    |
| HSPA7        | 0.602 | -0.2532 | 0.0173  |
| PKP3         | 0.723 | -0.2532 | <0.0001 |
| FBXO33       | 0.783 | -0.2531 | 0.0003  |
| RUNX2        | 0.839 | -0.2531 | 0.0009  |
| OR13C2       | 0.64  | -0.2531 | 0.0014  |
| LINC00965    | 0.475 | -0.2531 | <0.0001 |
| HCG11        | 0.56  | -0.253  | 0.0024  |
| MIR1275      | 0     | -0.2529 | <0.0001 |
| OR1P1        | 0     | -0.2528 | 0.0004  |
| RNF217       | 0.842 | -0.2526 | 0.0042  |
| SPPL2C       | 0.758 | -0.2525 | 0.0432  |
| LOC101929154 | 0.014 | -0.2525 | <0.0001 |
| NEK6         | 0.782 | -0.2524 | 0.0008  |
| TRIM74       | 0.639 | -0.2522 | 0.0037  |
| EVI2A        | 0.899 | -0.2521 | 0.0045  |
| NFIB         | 0.795 | -0.252  | 0.0003  |
| ADAMTSL4     | 0.916 | -0.252  | 0.0156  |
| LARGE-AS1    | 0.624 | -0.252  | 0.027   |
| KRTAP4-7     | 0.583 | -0.252  | <0.0001 |
| TGFBR2       | 0.872 | -0.2519 | 0.0041  |

|              |       |         |         |
|--------------|-------|---------|---------|
| SLC26A8      | 0.731 | -0.2517 | 0.0002  |
| NLRP7        | 0.599 | -0.2517 | <0.0001 |
| CHCHD10      | 0.753 | -0.2516 | 0.0012  |
| IL36A        | 0.745 | -0.2516 | 0.0136  |
| DYSF         | 0.83  | -0.2515 | 0.0005  |
| JAK3         | 0.843 | -0.2515 | 0.0006  |
| C1orf68      | 0.805 | -0.2515 | 0.0011  |
| FCER2        | 0.897 | -0.2515 | 0.004   |
| LOC339352    | 0     | -0.2515 | 0.0205  |
| LOC101927018 | 0     | -0.2515 | <0.0001 |
| NXNL2        | 0.656 | -0.2513 | 0.0001  |
| APOBR        | 0.786 | -0.2512 | 0.0135  |
| SRGAP3-AS3   | 0.044 | -0.2511 | 0.0005  |
| SLC40A1      | 0.818 | -0.251  | 0.0021  |
| B3GNT9       | 0.629 | -0.2509 | <0.0001 |
| OR7E140P     | 0     | -0.2508 | <0.0001 |
| OR2T2        | 0.633 | -0.2507 | 0.0036  |
| DDX19A       | 0.84  | -0.2506 | 0.0009  |
| PSTPIP1      | 0.814 | -0.2504 | 0.0008  |
| MPP1         | 0.851 | -0.2504 | 0.0017  |
| FXYD7        | 0.786 | -0.2503 | 0.0002  |
| S1PR3        | 0.798 | -0.2503 | 0.0063  |
| PAFAH1B1     | 0.882 | -0.2502 | 0.0059  |
| SLC26A4-AS1  | 0.525 | -0.2502 | 0.0065  |
| FRG2C        | 0.213 | -0.2502 | <0.0001 |
| UPP2-IT1     | 0.449 | -0.2501 | 0.0004  |
| KCNE2        | 0.789 | -0.25   | 0.0001  |
| MARK2P13     | 0     | -0.25   | 0.0012  |
| FAM47C       | 0.835 | -0.25   | 0.0019  |
| NT5E         | 0.861 | -0.25   | 0.0024  |
| OR2W3        | 0.737 | -0.2499 | 0.0017  |
| MIR145       | 0.391 | -0.2498 | 0.0259  |
| MIR32        | 0.604 | -0.2496 | 0.0388  |



|              |       |         |         |
|--------------|-------|---------|---------|
| TCN1         | 0.873 | -0.2495 | 0.0033  |
| CHDH         | 0.769 | -0.2494 | 0.0003  |
| CPA3         | 0.797 | -0.2493 | 0.0001  |
| HSFX1        | 0.624 | -0.2493 | 0.0018  |
| SPRR2F       | 0.811 | -0.2493 | 0.0245  |
| FAM162A      | 0.698 | -0.2492 | 0.0001  |
| PHF11        | 0.795 | -0.2492 | 0.0004  |
| RIMKLB       | 0.691 | -0.2492 | 0.0007  |
| ZNF80        | 0.665 | -0.2492 | <0.0001 |
| LOC100287837 | 0.441 | -0.2491 | 0.007   |
| SCARNA7      | 0.575 | -0.2491 | 0.0293  |
| TMEM225      | 0.392 | -0.2491 | <0.0001 |
| SFTA3        | 0.771 | -0.249  | 0.0073  |
| MARVELD1     | 0.463 | -0.249  | <0.0001 |
| SPATA6       | 0.66  | -0.249  | <0.0001 |
| GTF2IRD2     | 0.89  | -0.2489 | 0.0077  |
| SNORD43      | 0.596 | -0.2489 | 0.0411  |
| FOXP1-IT1    | 0.445 | -0.2489 | <0.0001 |
| SLC15A3      | 0.828 | -0.2487 | 0.0011  |
| SPINK2       | 0.877 | -0.2487 | 0.0062  |
| IL22         | 0.625 | -0.2487 | <0.0001 |
| CHN2         | 0.762 | -0.2487 | <0.0001 |
| GSN          | 0.951 | -0.2486 | 0.0454  |
| LOC729737    | 0.329 | -0.2486 | <0.0001 |
| COL18A1-AS1  | 0.739 | -0.2484 | 0.0412  |
| EIF5A        | 0.728 | -0.2483 | <0.0001 |
| EPPIN        | 0     | -0.2482 | <0.0001 |
| SPRED1       | 0.752 | -0.248  | 0.0006  |
| LOC101929762 | 0.107 | -0.248  | <0.0001 |
| DEFB135      | 0.575 | -0.2479 | 0.0008  |
| TSPEAR-AS2   | 0.19  | -0.2479 | 0.0009  |
| TLR1         | 0.893 | -0.2478 | 0.0079  |
| FZD4         | 0.848 | -0.2477 | 0.0011  |

|           |       |         |         |
|-----------|-------|---------|---------|
| MYLPF     | 0.853 | -0.2477 | 0.0035  |
| TTI2      | 0.731 | -0.2477 | 0.0057  |
| CDYL2     | 0.803 | -0.2476 | 0.0007  |
| SPATA22   | 0.707 | -0.2474 | 0.0002  |
| PI4K2B    | 0.791 | -0.2474 | 0.0038  |
| RBM25     | 0.901 | -0.2474 | 0.0121  |
| HTR2B     | 0.896 | -0.2471 | 0.0053  |
| DENND3    | 0.897 | -0.2471 | 0.0056  |
| ACOT11    | 0.834 | -0.247  | 0.0007  |
| CYP4F60P  | 0     | -0.247  | 0.0013  |
| GCLC      | 0.863 | -0.2469 | 0.0016  |
| BRD1      | 0.879 | -0.2469 | 0.0071  |
| LINC01455 | 0     | -0.2468 | 0.0013  |
| ERBB4     | 0.897 | -0.2467 | 0.0051  |
| PTCHD1    | 0.603 | -0.2467 | <0.0001 |
| KIF27     | 0.625 | -0.2467 | <0.0001 |
| ABCC2     | 0.798 | -0.2465 | 0.0002  |
| OR9Q2     | 0.499 | -0.2465 | <0.0001 |
| ABR       | 0.836 | -0.2464 | 0.0005  |
| TTY2      | 0     | -0.2464 | <0.0001 |
| KLHL4     | 0.784 | -0.2462 | 0.0001  |
| AK3P5     | 0     | -0.2462 | 0.0014  |
| KCNA6     | 0.912 | -0.2462 | 0.0201  |
| LOC151484 | 0.401 | -0.2462 | <0.0001 |
| RTP5      | 0.722 | -0.2461 | 0.0404  |
| NHLRC4    | 0.819 | -0.246  | 0.0171  |
| SCG5      | 0.89  | -0.2456 | 0.0077  |
| DDO       | 0.83  | -0.2455 | 0.0005  |
| EIF1AY    | 0.374 | -0.2455 | <0.0001 |
| IFIT1P1   | 0     | -0.2454 | 0.0014  |
| ZNF154    | 0.839 | -0.2453 | 0.0019  |
| HLA-K     | 0.317 | -0.2452 | 0.0015  |
| DAB1      | 0.861 | -0.2452 | 0.0018  |

|           |       |         |         |
|-----------|-------|---------|---------|
| DNAJA2    | 0.845 | -0.2451 | 0.0012  |
| PTPRO     | 0.852 | -0.2451 | 0.0024  |
| FILIP1    | 0.86  | -0.2451 | 0.0041  |
| TMEM139   | 0.723 | -0.245  | 0.0004  |
| ZFPM1     | 0.86  | -0.245  | 0.0078  |
| P4HA3     | 0.75  | -0.2449 | 0.0005  |
| LCA5      | 0.817 | -0.2449 | 0.0012  |
| TUBB1     | 0.831 | -0.2449 | 0.0025  |
| APBA2     | 0.826 | -0.2448 | 0.0004  |
| WDTC1     | 0.844 | -0.2448 | 0.0023  |
| AREG      | 0.877 | -0.2446 | 0.0053  |
| CHAT      | 0.749 | -0.2446 | <0.0001 |
| TRMT10A   | 0.551 | -0.2445 | 0.0044  |
| OR4Q2     | 0     | -0.2445 | 0.0467  |
| CD27      | 0.881 | -0.2444 | 0.0046  |
| LOC650293 | 0.596 | -0.2441 | 0.0036  |
| KRTAP1-1  | 0.681 | -0.2439 | 0.0003  |
| MAOA      | 0.87  | -0.2439 | 0.0034  |
| NFIC      | 0.92  | -0.2439 | 0.0218  |
| RFTN1     | 0.825 | -0.2438 | 0.0011  |
| ARAF      | 0.896 | -0.2438 | 0.0049  |
| CYBA      | 0.865 | -0.2436 | 0.0018  |
| FAM49A    | 0.86  | -0.2436 | 0.0037  |
| LOC441081 | 0.629 | -0.2433 | 0.0339  |
| UBE2DNL   | 0.842 | -0.2432 | 0.0241  |
| KCNQ1DN   | 0.773 | -0.243  | 0.0016  |
| PRSS50    | 0.786 | -0.243  | 0.0113  |
| HBQ1      | 0.91  | -0.2428 | 0.0106  |
| BEND2     | 0.452 | -0.2428 | <0.0001 |
| PHC1      | 0.888 | -0.2427 | 0.0193  |
| DGKA      | 0.87  | -0.2426 | 0.0034  |
| TTY7      | 0.662 | -0.2426 | 0.0151  |
| REP15     | 0.804 | -0.2426 | 0.0191  |

|              |       |         |         |
|--------------|-------|---------|---------|
| ATG5         | 0.737 | -0.2425 | <0.0001 |
| PINK1-AS     | 0.662 | -0.2424 | 0.0413  |
| LOC100506731 | 0     | -0.2424 | <0.0001 |
| TTY15        | 0.489 | -0.2424 | <0.0001 |
| TRAPPC10     | 0.796 | -0.2423 | 0.0062  |
| FMO5         | 0.826 | -0.2421 | 0.0005  |
| CMAHP        | 0.281 | -0.2421 | <0.0001 |
| ZNF549       | 0.609 | -0.2421 | <0.0001 |
| SERPIND1     | 0.848 | -0.242  | 0.0034  |
| BAG4         | 0.778 | -0.2419 | 0.0002  |
| HCAR3        | 0.554 | -0.2419 | 0.0018  |
| ANKRD33B-AS1 | 0.372 | -0.2418 | 0.0008  |
| ADGRF3       | 0.447 | -0.2418 | 0.001   |
| OTOF         | 0.762 | -0.2417 | 0.0002  |
| CPB1         | 0.91  | -0.2417 | 0.0095  |
| GCNT2        | 0.676 | -0.2417 | <0.0001 |
| KCNT2        | 0.869 | -0.2416 | 0.0077  |
| ZC3H7B       | 0.891 | -0.2415 | 0.0114  |
| SLC25A11     | 0.864 | -0.2414 | 0.0035  |
| TUSC7        | 0     | -0.2414 | <0.0001 |
| NR3C1        | 0.901 | -0.2413 | 0.0118  |
| TRPC5        | 0.575 | -0.2413 | <0.0001 |
| LAMC2        | 0.917 | -0.2412 | 0.013   |
| LOC100131496 | 0.658 | -0.2411 | 0.0119  |
| MTND1P10     | 0     | -0.241  | 0.0017  |
| SIK2         | 0.746 | -0.2409 | 0.002   |
| MGAT4D       | 0.069 | -0.2408 | 0.0007  |
| MYH11        | 0.858 | -0.2408 | 0.0028  |
| MIR200C      | 0.752 | -0.2406 | 0.0392  |
| RNF166       | 0.9   | -0.2405 | 0.0274  |
| MIR892A      | 0     | -0.2405 | 0.0292  |
| TARM1        | 0.35  | -0.2405 | <0.0001 |
| STS          | 0.872 | -0.2404 | 0.0056  |

|               |       |         |         |
|---------------|-------|---------|---------|
| SPRNP1        | 0.566 | -0.2404 | 0.0454  |
| GPR55         | 0.758 | -0.2403 | 0.0003  |
| MYL9          | 0.833 | -0.2403 | 0.0015  |
| CBX7          | 0.857 | -0.2403 | 0.0016  |
| KRT27         | 0.899 | -0.2403 | 0.0147  |
| MIR146A       | 0.004 | -0.24   | <0.0001 |
| CHAD          | 0.891 | -0.2399 | 0.0055  |
| LRRC10        | 0.693 | -0.2398 | 0.0007  |
| SEC22B        | 0.879 | -0.2398 | 0.0159  |
| HAR1B         | 0.184 | -0.2398 | <0.0001 |
| MIR301B       | 0.023 | -0.2397 | <0.0001 |
| DKFZp779M0652 | 0.63  | -0.2396 | 0.0078  |
| ADAM19        | 0.896 | -0.2395 | 0.0067  |
| SMCO4         | 0.743 | -0.2395 | 0.0218  |
| MIR1202       | 0.203 | -0.2395 | <0.0001 |
| HELB          | 0.898 | -0.2394 | 0.0156  |
| RSL24D1P2     | 0     | -0.2393 | 0.0019  |
| SBDS          | 0.86  | -0.239  | 0.0362  |
| SPO11         | 0.663 | -0.239  | <0.0001 |
| IQCA1L        | 0     | -0.2389 | 0.0023  |
| CCAT2         | 0.332 | -0.2389 | 0.0023  |
| KIAA1191      | 0.798 | -0.2388 | 0.0011  |
| SETD7         | 0.788 | -0.2388 | 0.0017  |
| PSMB11        | 0.707 | -0.2388 | 0.017   |
| CES1          | 0.911 | -0.2388 | 0.0351  |
| SLC26A1       | 0.726 | -0.2387 | 0.0001  |
| AP1AR         | 0.847 | -0.2387 | 0.0175  |
| LINC00398     | 0     | -0.2385 | 0.0005  |
| LINC00208     | 0.714 | -0.2384 | 0.0288  |
| TXNRD2        | 0.794 | -0.2383 | 0.0009  |
| DNAH6         | 0.777 | -0.2382 | 0.0006  |
| CLEC1A        | 0.817 | -0.2382 | 0.0006  |
| STYK1         | 0.377 | -0.2382 | <0.0001 |

|              |       |         |         |
|--------------|-------|---------|---------|
| JSRP1        | 0.861 | -0.2381 | 0.0045  |
| CHRNA10      | 0.895 | -0.2381 | 0.0077  |
| LINC00863    | 0     | -0.238  | 0.0018  |
| PRKACA       | 0.898 | -0.238  | 0.0128  |
| TTY1         | 0.726 | -0.238  | 0.0432  |
| LOC101927769 | 0     | -0.238  | <0.0001 |
| RETN         | 0.775 | -0.2378 | 0.0006  |
| GPA33        | 0.882 | -0.2376 | 0.0041  |
| F10          | 0.888 | -0.2376 | 0.0058  |
| CKMT2        | 0.896 | -0.2376 | 0.0062  |
| MYBPC3       | 0.894 | -0.2375 | 0.0099  |
| UFL1         | 0.715 | -0.2374 | 0.0076  |
| PYGM         | 0.89  | -0.2374 | 0.0104  |
| SLC2A3       | 0.885 | -0.2374 | 0.0127  |
| MOCS1        | 0.901 | -0.2374 | 0.0159  |
| ZNF275       | 0.745 | -0.2373 | 0.0009  |
| ACAD10       | 0.842 | -0.2373 | 0.0014  |
| GFPT2        | 0.882 | -0.2373 | 0.0043  |
| ARGFXP2      | 0.586 | -0.2372 | 0.0082  |
| PLEKHA7      | 0.896 | -0.2372 | 0.026   |
| HNF1B        | 0.745 | -0.2371 | 0.0005  |
| GLI3         | 0.896 | -0.2371 | 0.0069  |
| RAB12        | 0.749 | -0.2369 | 0.001   |
| CALML5       | 0.834 | -0.2369 | 0.0014  |
| ZNF597       | 0.615 | -0.2369 | <0.0001 |
| GNAT2        | 0.837 | -0.2368 | 0.0031  |
| ZNF415       | 0.642 | -0.2368 | <0.0001 |
| DUTP1        | 0     | -0.2367 | 0.001   |
| CD80         | 0.883 | -0.2367 | 0.0046  |
| ISYNA1       | 0.784 | -0.2366 | 0.0006  |
| FRG2B        | 0.605 | -0.2366 | 0.0041  |
| C4orf50      | 0.677 | -0.2364 | 0.018   |
| RERGL        | 0.535 | -0.2364 | <0.0001 |

|            |       |         |         |
|------------|-------|---------|---------|
| LTF        | 0.808 | -0.2363 | 0.0006  |
| RNU6-1199P | 0     | -0.2362 | 0.001   |
| PLA2G12B   | 0.748 | -0.2361 | 0.0017  |
| SRRM1      | 0.902 | -0.2361 | 0.0172  |
| DNAJC28    | 0.773 | -0.236  | 0.0013  |
| TUBB6      | 0.897 | -0.236  | 0.0151  |
| HMGB4      | 0.608 | -0.2357 | <0.0001 |
| TFB1M      | 0.781 | -0.2355 | 0.0006  |
| MYO3B      | 0.795 | -0.2354 | 0.0022  |
| APOL2      | 0.61  | -0.2354 | <0.0001 |
| IQCF5      | 0.755 | -0.2353 | 0.0189  |
| IFNG       | 0.652 | -0.2353 | <0.0001 |
| MS4A14     | 0.857 | -0.2352 | 0.0176  |
| PTER       | 0.67  | -0.2352 | <0.0001 |
| CGNL1      | 0.805 | -0.2351 | 0.0034  |
| RNU4-53P   | 0     | -0.235  | 0.0009  |
| IQSEC2     | 0.823 | -0.2349 | 0.001   |
| LRRTM1     | 0.864 | -0.2348 | 0.0074  |
| TAF4B      | 0.769 | -0.2347 | 0.0006  |
| SFMBT2     | 0.516 | -0.2347 | <0.0001 |
| FLJ20712   | 0.844 | -0.2345 | 0.0472  |
| LINC01081  | 0.02  | -0.2343 | 0.0028  |
| HOXA2      | 0.594 | -0.2343 | <0.0001 |
| ENGASE     | 0.881 | -0.2342 | 0.0375  |
| KIAA1211   | 0.61  | -0.2341 | 0.0002  |
| DUTP7      | 0     | -0.2341 | 0.0024  |
| TBC1D3F    | 0.554 | -0.2341 | 0.0334  |
| LINC00326  | 0.654 | -0.2339 | 0.0195  |
| MIR488     | 0     | -0.2339 | 0.0344  |
| LRRC47     | 0.702 | -0.2339 | <0.0001 |
| ZNF667     | 0.778 | -0.2338 | 0.0006  |
| ZNF808     | 0.607 | -0.2337 | <0.0001 |
| HAP1       | 0.724 | -0.2337 | <0.0001 |

|             |       |         |         |
|-------------|-------|---------|---------|
| KDM4B       | 0.883 | -0.2336 | 0.0441  |
| WNT10A      | 0.815 | -0.2335 | 0.0034  |
| NOTCH2      | 0.746 | -0.2334 | 0.0003  |
| BCO1        | 0     | -0.2334 | 0.0013  |
| LINC00254   | 0.035 | -0.2331 | 0.002   |
| PTPN6       | 0.875 | -0.2331 | 0.0068  |
| KCNH3       | 0.78  | -0.233  | 0.0007  |
| ANKRD20A2   | 0.559 | -0.233  | 0.0132  |
| PCSK4       | 0.881 | -0.233  | 0.0192  |
| ARGLU1      | 0.914 | -0.2329 | 0.0361  |
| SMIM10      | 0.213 | -0.2328 | <0.0001 |
| UGT2B17     | 0.746 | -0.2325 | 0.0003  |
| SLC23A3     | 0.821 | -0.2325 | 0.0045  |
| FAM189A2    | 0.571 | -0.2324 | 0.0002  |
| P2RX3       | 0.851 | -0.2324 | 0.0033  |
| GOLIM4      | 0.734 | -0.2323 | 0.0003  |
| RN7SL328P   | 0     | -0.2322 | 0.0012  |
| FXYD5       | 0.864 | -0.2322 | 0.0033  |
| AHSP        | 0.838 | -0.2322 | 0.0082  |
| MIR367      | 0     | -0.2321 | <0.0001 |
| LINC00507   | 0.614 | -0.232  | 0.0281  |
| MIR524      | 0.037 | -0.232  | 0.036   |
| MIR1471     | 0.07  | -0.2318 | <0.0001 |
| ODF3        | 0.662 | -0.2317 | 0.0005  |
| TC2N        | 0.767 | -0.2317 | 0.0016  |
| NUDT12      | 0.809 | -0.2317 | 0.0038  |
| SNORD114-17 | 0     | -0.2317 | 0.0234  |
| ZDHHC21     | 0.876 | -0.2316 | 0.0183  |
| UNCX        | 0.708 | -0.2315 | 0.0113  |
| MIR302E     | 0     | -0.2315 | <0.0001 |
| USP18       | 0.721 | -0.2314 | 0.0015  |
| SETP5       | 0     | -0.2314 | 0.0026  |
| TNMD        | 0.756 | -0.2313 | 0.0004  |



|              |       |         |         |
|--------------|-------|---------|---------|
| SNORA7B      | 0.343 | -0.2313 | <0.0001 |
| LOC100507389 | 0.453 | -0.2312 | <0.0001 |
| RNU6-944P    | 0     | -0.2311 | 0.0013  |
| STYX         | 0.799 | -0.2311 | 0.0029  |
| VCAM1        | 0.912 | -0.2309 | 0.0229  |
| ZNF132       | 0.816 | -0.2308 | 0.0014  |
| RPS7P6       | 0     | -0.2308 | 0.0027  |
| LGR4         | 0.736 | -0.2307 | 0.0001  |
| MAPK15       | 0.748 | -0.2306 | 0.0003  |
| DPRX         | 0.704 | -0.2306 | 0.0012  |
| MIR515-2     | 0     | -0.2306 | 0.0383  |
| MIR1305      | 0.466 | -0.2306 | <0.0001 |
| LINC01340    | 0     | -0.2305 | 0.0026  |
| MYOZ2        | 0.879 | -0.2305 | 0.0079  |
| DCTN6        | 0.849 | -0.2304 | 0.002   |
| SLC22A2      | 0.845 | -0.2304 | 0.0035  |
| GJD3         | 0.9   | -0.2304 | 0.0316  |
| TMEM247      | 0.42  | -0.2303 | 0.0315  |
| EPHB3        | 0.882 | -0.2302 | 0.0056  |
| CD52         | 0.906 | -0.2301 | 0.0126  |
| HOOK2        | 0.905 | -0.2301 | 0.0131  |
| RALYL        | 0.67  | -0.23   | 0.0001  |
| HIVEP3       | 0.775 | -0.23   | 0.0003  |
| SLC25A41     | 0.784 | -0.23   | 0.002   |
| SGK2         | 0.835 | -0.23   | 0.0038  |
| AQP12B       | 0.843 | -0.2298 | 0.0266  |
| STK38L       | 0.809 | -0.2297 | 0.0019  |
| DPP10        | 0.808 | -0.2297 | 0.002   |
| LYRM9        | 0.502 | -0.2296 | 0.002   |
| WDR78        | 0.54  | -0.2296 | <0.0001 |
| HEPH         | 0.895 | -0.2295 | 0.0086  |
| FOLR3        | 0.905 | -0.2295 | 0.0135  |
| LOC647070    | 0.702 | -0.2295 | 0.0498  |

|           |       |         |         |
|-----------|-------|---------|---------|
| REV1      | 0.874 | -0.2291 | 0.0112  |
| MALT1     | 0.921 | -0.229  | 0.0224  |
| TMEM37    | 0.44  | -0.229  | <0.0001 |
| RN7SKP240 | 0.447 | -0.2289 | 0.0013  |
| KIR2DL5B  | 0.366 | -0.2289 | <0.0001 |
| CARD19    | 0     | -0.2288 | 0.0019  |
| C1QTNF9   | 0.765 | -0.2287 | 0.0052  |
| PRAMENP   | 0     | -0.2286 | 0.0012  |
| PLCH2     | 0.821 | -0.2286 | 0.0023  |
| DND1P1    | 0     | -0.2286 | 0.003   |
| RPL29P14  | 0.114 | -0.2286 | 0.003   |
| THPO      | 0.866 | -0.2286 | 0.0084  |
| PPCS      | 0.75  | -0.2284 | 0.0009  |
| KLK14     | 0.864 | -0.2284 | 0.0044  |
| HIGD1C    | 0.761 | -0.2284 | 0.0143  |
| LOC401357 | 0.6   | -0.2283 | 0.0248  |
| C16orf72  | 0.81  | -0.2281 | 0.002   |
| MIR98     | 0.354 | -0.2281 | 0.014   |
| CSH2      | 0.673 | -0.2278 | 0.001   |
| MVK       | 0.849 | -0.2277 | 0.0041  |
| KIAA0408  | 0.928 | -0.2277 | 0.0496  |
| GCNT7     | 0.706 | -0.2276 | 0.0004  |
| MIR320B1  | 0     | -0.2276 | <0.0001 |
| MRPS36    | 0.655 | -0.2275 | 0.0003  |
| NUTM1     | 0.732 | -0.2275 | 0.0471  |
| BTBD18    | 0.608 | -0.2274 | 0.002   |
| FAHD1     | 0.86  | -0.2274 | 0.0068  |
| SLC5A12   | 0.67  | -0.2273 | 0.0001  |
| OR2V1     | 0     | -0.2271 | 0.0006  |
| ABCC3     | 0.893 | -0.2271 | 0.0088  |
| PHF24     | 0     | -0.2267 | 0.0027  |
| IFT57     | 0.855 | -0.2267 | 0.0037  |
| PIGL      | 0.92  | -0.2267 | 0.0321  |

|              |       |         |         |
|--------------|-------|---------|---------|
| RBM6         | 0.932 | -0.2267 | 0.0481  |
| LOC101928940 | 0.367 | -0.2267 | <0.0001 |
| DEFT1P       | 0.535 | -0.2266 | 0.0094  |
| UFM1         | 0.922 | -0.2266 | 0.0365  |
| AKT3-IT1     | 0.021 | -0.2265 | 0.0016  |
| OVOL2        | 0.747 | -0.2264 | 0.0005  |
| TCEAL6       | 0.769 | -0.2263 | 0.022   |
| CTXN3        | 0.476 | -0.2263 | <0.0001 |
| CD83         | 0.936 | -0.2262 | 0.0415  |
| ZFP42        | 0.754 | -0.226  | 0.0024  |
| CCR9         | 0.899 | -0.226  | 0.0106  |
| TP53AIP1     | 0.701 | -0.2258 | 0.0014  |
| RNF216-IT1   | 0.356 | -0.2258 | 0.0016  |
| FBN2         | 0.842 | -0.2258 | 0.0018  |
| ERVH-1       | 0.34  | -0.2257 | <0.0001 |
| ACSS3        | 0.736 | -0.2256 | 0.0008  |
| RBM43        | 0.807 | -0.2256 | 0.0045  |
| HBM          | 0.835 | -0.2256 | 0.0048  |
| FOXD4L4      | 0.628 | -0.2256 | 0.01    |
| MAGI2        | 0.868 | -0.2255 | 0.0046  |
| IL4          | 0.632 | -0.2255 | <0.0001 |
| TRIM69       | 0.86  | -0.2253 | 0.0133  |
| THEGL        | 0.083 | -0.2251 | 0.0006  |
| C2orf50      | 0.849 | -0.225  | 0.0086  |
| NECAP1       | 0.879 | -0.225  | 0.0142  |
| COL11A2      | 0.816 | -0.2249 | 0.001   |
| SPATA31A1    | 0.204 | -0.2249 | 0.0011  |
| DNAJB4       | 0.866 | -0.2249 | 0.0048  |
| DRAIC        | 0     | -0.2248 | 0.003   |
| SLC9A4       | 0.784 | -0.2248 | 0.0398  |
| EPHA6        | 0.749 | -0.2247 | 0.0007  |
| OR51H1       | 0     | -0.2245 | 0.0038  |
| LXN          | 0.894 | -0.2245 | 0.0096  |

|              |       |         |         |
|--------------|-------|---------|---------|
| DPYSL2       | 0.9   | -0.2245 | 0.0122  |
| PTAFR        | 0.905 | -0.2245 | 0.0213  |
| SYT4         | 0.69  | -0.2244 | 0.0007  |
| FLJ44635     | 0.588 | -0.2243 | 0.0081  |
| SON          | 0.875 | -0.2243 | 0.0096  |
| LOC100131635 | 0.444 | -0.2243 | <0.0001 |
| AQP11        | 0.647 | -0.2243 | <0.0001 |
| PCDHGC3      | 0.824 | -0.2242 | 0.0119  |
| LRP1         | 0.913 | -0.2242 | 0.0194  |
| CBX5P1       | 0     | -0.2241 | 0.0036  |
| CYP46A1      | 0.87  | -0.224  | 0.0055  |
| PGRMC1       | 0.837 | -0.2237 | 0.0035  |
| TOR1A        | 0.897 | -0.2237 | 0.0194  |
| CMPK2        | 0.801 | -0.2236 | 0.005   |
| PSMB10       | 0.879 | -0.2236 | 0.0139  |
| FBXW12       | 0.757 | -0.2235 | 0.0004  |
| PCNPP5       | 0     | -0.2235 | 0.0014  |
| GATA4        | 0.824 | -0.2235 | 0.0017  |
| PTGER1       | 0.848 | -0.2235 | 0.0042  |
| HLA-DRB4     | 0.807 | -0.2234 | 0.0041  |
| SLC23A1      | 0.697 | -0.2232 | 0.0005  |
| MIR1-2       | 0     | -0.2231 | <0.0001 |
| SELENOI      | 0     | -0.223  | 0.0027  |
| ERVH-6       | 0     | -0.2229 | <0.0001 |
| CX3CL1       | 0.857 | -0.2228 | 0.0036  |
| RNVU1-19     | 0.36  | -0.2227 | 0.002   |
| HEATR4       | 0.807 | -0.2227 | 0.0039  |
| HSPB2        | 0.895 | -0.2227 | 0.0114  |
| ACBD5        | 0.786 | -0.2226 | 0.0016  |
| MOCOS        | 0.776 | -0.2226 | 0.0019  |
| ARHGEF4      | 0.848 | -0.2224 | 0.0024  |
| SELENOV      | 0     | -0.2224 | 0.0033  |
| ITGBL1       | 0.875 | -0.2224 | 0.0065  |

|              |       |         |         |
|--------------|-------|---------|---------|
| RNU2-63P     | 0.048 | -0.2223 | 0.002   |
| CD22         | 0.774 | -0.2221 | 0.0005  |
| RPL26        | 0.829 | -0.2221 | 0.0219  |
| PIEZO1       | 0.587 | -0.2219 | 0.0027  |
| GP9          | 0.89  | -0.2219 | 0.0098  |
| UNC79        | 0.747 | -0.2217 | 0.0251  |
| NAALAD2      | 0.545 | -0.2217 | <0.0001 |
| TMPRSS13     | 0.68  | -0.2216 | 0.0004  |
| TNFRSF14     | 0.886 | -0.2216 | 0.0149  |
| LOC100130476 | 0     | -0.2216 | <0.0001 |
| HSD17B11     | 0.807 | -0.2215 | 0.0012  |
| NOG          | 0.726 | -0.2214 | 0.0011  |
| ZNF354C      | 0.747 | -0.2214 | 0.0017  |
| OR13C8       | 0.711 | -0.2213 | 0.0059  |
| ALDH3A2      | 0.893 | -0.2213 | 0.0112  |
| SYCE1        | 0.863 | -0.2213 | 0.0197  |
| PPP3CA       | 0.9   | -0.2213 | 0.0201  |
| TPGS1        | 0.782 | -0.2213 | 0.0494  |
| LTBP3        | 0.857 | -0.2212 | 0.0037  |
| C12orf77     | 0.803 | -0.2212 | 0.0293  |
| IDS          | 0.887 | -0.2211 | 0.0086  |
| CXCR5        | 0.771 | -0.2209 | 0.0019  |
| TTC8         | 0.756 | -0.2209 | 0.0023  |
| BTD          | 0.919 | -0.2209 | 0.026   |
| BIVM         | 0.701 | -0.2207 | 0.0002  |
| ATP1B3-AS1   | 0     | -0.2207 | 0.0016  |
| RNU6-313P    | 0.361 | -0.2207 | 0.0022  |
| RPL17P17     | 0     | -0.2207 | 0.0041  |
| PPP1R27      | 0.722 | -0.2207 | 0.0275  |
| SLFN5        | 0.74  | -0.2205 | 0.0016  |
| ZNF800       | 0.839 | -0.2205 | 0.0109  |
| SETX         | 0.9   | -0.2205 | 0.0278  |
| SIAH1        | 0.902 | -0.2203 | 0.0234  |

|            |       |         |         |
|------------|-------|---------|---------|
| SLC36A3    | 0.531 | -0.2202 | 0.0003  |
| ANKRD17    | 0.825 | -0.2201 | 0.0022  |
| HBBP1      | 0.849 | -0.2201 | 0.0126  |
| PCDH11Y    | 0.505 | -0.2199 | 0.0001  |
| UBR3       | 0.808 | -0.2199 | 0.0189  |
| MEF2A      | 0.918 | -0.2199 | 0.025   |
| IFIH1      | 0.827 | -0.2197 | 0.0023  |
| HPCAL4     | 0.769 | -0.2196 | 0.0004  |
| RN7SL359P  | 0     | -0.2196 | 0.0022  |
| IQCJ       | 0.689 | -0.2196 | 0.0072  |
| C2orf70    | 0.569 | -0.2194 | 0.0014  |
| PNPLA8     | 0.759 | -0.2194 | 0.0022  |
| COA5       | 0.325 | -0.2194 | <0.0001 |
| RN7SL672P  | 0     | -0.2193 | 0.0023  |
| TSPAN4     | 0.907 | -0.2193 | 0.0306  |
| ANKRD53    | 0.784 | -0.2192 | 0.0008  |
| ANKK1      | 0.79  | -0.2192 | 0.0045  |
| SMG6-IT1   | 0     | -0.2192 | 0.0049  |
| SERHL2     | 0.906 | -0.2192 | 0.0353  |
| KCTD9P2    | 0     | -0.2191 | 0.0018  |
| OR52H1     | 0.388 | -0.2191 | <0.0001 |
| DLGAP2-AS1 | 0.427 | -0.2191 | <0.0001 |
| PCDHB15    | 0.632 | -0.219  | 0.0002  |
| TDH        | 0.753 | -0.2189 | 0.0053  |
| C16orf90   | 0.68  | -0.2189 | 0.0174  |
| XAGE3      | 0.845 | -0.2188 | 0.0126  |
| SLC15A2    | 0.898 | -0.2188 | 0.0205  |
| ZNF577     | 0.9   | -0.2188 | 0.0422  |
| C1QL2      | 0.795 | -0.2187 | 0.0062  |
| SLC12A6    | 0.79  | -0.2186 | 0.0018  |
| HSPB7      | 0.825 | -0.2184 | 0.0019  |
| SYDE1      | 0.813 | -0.2184 | 0.0034  |
| PLCE1-AS2  | 0.344 | -0.2184 | 0.0053  |

|            |       |         |         |
|------------|-------|---------|---------|
| PHLPP1     | 0.783 | -0.2184 | 0.0093  |
| MIR6765    | 0     | -0.2183 | 0.0052  |
| TTYH1      | 0.872 | -0.2182 | 0.0105  |
| MIR382     | 0.336 | -0.2182 | <0.0001 |
| RN7SL186P  | 0     | -0.2181 | 0.0024  |
| RN7SKP273  | 0     | -0.218  | 0.0021  |
| TERB2      | 0     | -0.2177 | 0.0034  |
| EPS8L2     | 0.878 | -0.2177 | 0.0094  |
| LINC01206  | 0.248 | -0.2177 | <0.0001 |
| PACSIN3    | 0.632 | -0.2177 | <0.0001 |
| LRRC28     | 0.788 | -0.2175 | 0.002   |
| C9orf131   | 0.822 | -0.2175 | 0.0055  |
| AP5M1      | 0.711 | -0.2175 | 0.0254  |
| SLC30A4    | 0.659 | -0.2174 | 0.0001  |
| PTCH2      | 0.9   | -0.2174 | 0.025   |
| GFI1B      | 0.724 | -0.2173 | 0.0002  |
| TJP3       | 0.739 | -0.2173 | 0.0006  |
| PMCHL2     | 0.789 | -0.2173 | 0.0393  |
| CASC1      | 0.715 | -0.2172 | 0.0001  |
| RORC       | 0.903 | -0.2172 | 0.0236  |
| HLA-DPA1   | 0.92  | -0.217  | 0.0409  |
| LINC00552  | 0.027 | -0.2169 | 0.0015  |
| CTAGE10P   | 0.333 | -0.2168 | 0.0001  |
| RPS6KA5    | 0.811 | -0.2167 | 0.0026  |
| C7orf71    | 0.549 | -0.2167 | 0.0471  |
| PRDM11     | 0.76  | -0.2166 | 0.0011  |
| TRMO       | 0     | -0.2166 | 0.0034  |
| ALKBH3-AS1 | 0.584 | -0.2165 | 0.0358  |
| KLHDC7A    | 0.697 | -0.2164 | 0.0003  |
| DOK3       | 0.795 | -0.2164 | 0.0011  |
| SLC25A26   | 0.799 | -0.2164 | 0.0054  |
| LINC00641  | 0.118 | -0.2164 | <0.0001 |
| LOC90246   | 0.427 | -0.2164 | <0.0001 |

|            |       |         |         |
|------------|-------|---------|---------|
| DDX3Y      | 0.693 | -0.2164 | <0.0001 |
| SECISBP2L  | 0.806 | -0.2163 | 0.0127  |
| PGAP3      | 0.697 | -0.2162 | 0.0026  |
| SNORD113-8 | 0.4   | -0.2162 | 0.0351  |
| SMIM10L2B  | 0     | -0.2161 | 0.0046  |
| RASSF6     | 0.71  | -0.216  | 0.0009  |
| LINC00301  | 0.689 | -0.2157 | 0.0411  |
| FLJ45513   | 0.352 | -0.2157 | <0.0001 |
| SPEM1      | 0.815 | -0.2156 | 0.0213  |
| MIR16-1    | 0.112 | -0.2155 | 0.0001  |
| ADIPOQ     | 0.894 | -0.2155 | 0.015   |
| CCL22      | 0.862 | -0.2154 | 0.0051  |
| CDC42EP2   | 0.884 | -0.2154 | 0.0119  |
| ITGAL      | 0.866 | -0.2153 | 0.0057  |
| S100B      | 0.871 | -0.2153 | 0.0107  |
| TBCK       | 0.77  | -0.2153 | 0.0144  |
| WFIKKN2    | 0.819 | -0.2152 | 0.0078  |
| ECH1       | 0.894 | -0.215  | 0.0173  |
| PPIHP1     | 0.462 | -0.2149 | 0.0053  |
| ITGB2      | 0.867 | -0.2149 | 0.0059  |
| CAPN6      | 0.874 | -0.2149 | 0.0092  |
| BATF2      | 0.609 | -0.2147 | <0.0001 |
| RNFT1      | 0.695 | -0.2146 | 0.0018  |
| LINC00856  | 0     | -0.2146 | <0.0001 |
| CD40       | 0.841 | -0.2144 | 0.003   |
| OR10AA1P   | 0.299 | -0.2143 | 0.0029  |
| RPL13P4    | 0     | -0.2142 | 0.0053  |
| KIFC3      | 0.874 | -0.2142 | 0.0112  |
| RNF149     | 0.842 | -0.2142 | 0.0152  |
| OOSP2      | 0     | -0.214  | <0.0001 |
| SNX10      | 0.843 | -0.2139 | 0.0062  |
| FAM205BP   | 0     | -0.2138 | 0.0041  |
| RTTN       | 0.77  | -0.2138 | 0.0044  |



|           |       |         |         |
|-----------|-------|---------|---------|
| MON1B     | 0.855 | -0.2137 | 0.0105  |
| SLC2A12   | 0.869 | -0.2137 | 0.026   |
| KRT80     | 0.805 | -0.2134 | 0.0032  |
| SPCS3     | 0.897 | -0.2133 | 0.0298  |
| RN7SL517P | 0     | -0.2132 | 0.003   |
| COL9A3    | 0.846 | -0.2132 | 0.0055  |
| MAK16     | 0.826 | -0.2132 | 0.0099  |
| KIR2DS4   | 0.838 | -0.2131 | 0.0151  |
| IGFBP7    | 0.904 | -0.2131 | 0.0193  |
| CCK       | 0.863 | -0.213  | 0.0072  |
| DPPA3     | 0.557 | -0.2129 | 0.0015  |
| CIDEA     | 0.77  | -0.2128 | 0.0012  |
| GPC6      | 0.794 | -0.2128 | 0.002   |
| PRKX      | 0.812 | -0.2128 | 0.0031  |
| C20orf85  | 0.816 | -0.2127 | 0.0086  |
| MIB2      | 0.906 | -0.2127 | 0.0353  |
| VIP       | 0.865 | -0.2126 | 0.0105  |
| L2HGDH    | 0.878 | -0.2125 | 0.0127  |
| CDKN1B    | 0.896 | -0.2125 | 0.0163  |
| SLC19A2   | 0.886 | -0.2125 | 0.0198  |
| SDK2      | 0.85  | -0.2124 | 0.0092  |
| CTRB2     | 0.882 | -0.2124 | 0.0218  |
| SAMD8     | 0.843 | -0.2122 | 0.0162  |
| COBL      | 0.729 | -0.2121 | 0.0003  |
| CCDC179   | 0     | -0.2121 | 0.0014  |
| KCNQ5-AS1 | 0     | -0.2121 | 0.0032  |
| NMRK2     | 0.639 | -0.2121 | 0.0126  |
| IRF1      | 0.896 | -0.2121 | 0.0157  |
| MAPK8     | 0.9   | -0.2121 | 0.0176  |
| SUSD3     | 0.374 | -0.2121 | <0.0001 |
| RN7SL181P | 0.335 | -0.212  | 0.0032  |
| USP41     | 0.756 | -0.212  | 0.0453  |
| CNTLN     | 0.892 | -0.2119 | 0.0336  |

|           |       |         |         |
|-----------|-------|---------|---------|
| MIR1294   | 0.272 | -0.2117 | 0.0002  |
| NLGN4X    | 0.757 | -0.2117 | 0.0013  |
| MS4A5     | 0.717 | -0.2116 | 0.0008  |
| KRT78     | 0.906 | -0.2116 | 0.0376  |
| GP5       | 0.898 | -0.2115 | 0.0233  |
| PIRT      | 0.826 | -0.2114 | 0.0494  |
| MIR1207   | 0.302 | -0.2113 | 0.0002  |
| LINC01485 | 0     | -0.2112 | 0.0056  |
| LRRTM2    | 0.609 | -0.2112 | <0.0001 |
| UPK3B     | 0.676 | -0.2111 | 0.0004  |
| DFFB      | 0.889 | -0.211  | 0.0159  |
| CMA1      | 0.838 | -0.2109 | 0.0036  |
| NUDT13    | 0.837 | -0.2109 | 0.0077  |
| MRPL1     | 0.864 | -0.2109 | 0.0248  |
| KDM5D     | 0.473 | -0.2108 | <0.0001 |
| ZNF123P   | 0     | -0.2107 | 0.0062  |
| BAIAP3    | 0.887 | -0.2107 | 0.0126  |
| STARD10   | 0.832 | -0.2107 | 0.0129  |
| NPTXR     | 0.678 | -0.2106 | 0.0002  |
| AVP       | 0.776 | -0.2106 | 0.0009  |
| UST-AS1   | 0.004 | -0.2106 | 0.0053  |
| ROM1      | 0.873 | -0.2106 | 0.0127  |
| HSF5      | 0.627 | -0.2105 | 0.0001  |
| LOC389199 | 0.835 | -0.2105 | 0.0468  |
| LINGO2    | 0.484 | -0.2105 | <0.0001 |
| TTY5      | 0.683 | -0.2104 | 0.0023  |
| MERTK     | 0.824 | -0.2104 | 0.0026  |
| VWA3A     | 0.72  | -0.2102 | 0.0023  |
| USP47     | 0.793 | -0.2102 | 0.003   |
| MIR1302-5 | 0.14  | -0.2102 | <0.0001 |
| DDX58     | 0.817 | -0.2101 | 0.0033  |
| SFTPB     | 0.893 | -0.2101 | 0.0213  |
| TCN2      | 0.896 | -0.2101 | 0.0244  |

|              |       |         |         |
|--------------|-------|---------|---------|
| C12orf54     | 0.639 | -0.21   | 0.0003  |
| BTNL2        | 0.675 | -0.21   | 0.0003  |
| CCL24        | 0.888 | -0.21   | 0.0152  |
| POLR2C       | 0.898 | -0.2098 | 0.0268  |
| CCNL2        | 0.906 | -0.2097 | 0.0329  |
| GPRC5A       | 0.794 | -0.2096 | 0.0014  |
| FSTL3        | 0.811 | -0.2096 | 0.0019  |
| UBQLNL       | 0.772 | -0.2093 | 0.0041  |
| TEPP         | 0.676 | -0.2092 | 0.0025  |
| CELF2-AS2    | 0.413 | -0.2092 | 0.0036  |
| MTRF1L       | 0.624 | -0.2091 | <0.0001 |
| RNU2-28P     | 0.335 | -0.209  | 0.0033  |
| KLHDC2       | 0.83  | -0.209  | 0.004   |
| OR10H5       | 0.527 | -0.209  | 0.0055  |
| LOC100507221 | 0.175 | -0.2089 | 0.0002  |
| CTNND1       | 0.896 | -0.2089 | 0.0332  |
| LINC00337    | 0.528 | -0.2088 | 0.0188  |
| WFDC5        | 0.59  | -0.2087 | 0.0003  |
| TTY6B        | 0.4   | -0.2087 | 0.0007  |
| TAS1R3       | 0.797 | -0.2087 | 0.0198  |
| LEFTY1       | 0.663 | -0.2086 | 0.0001  |
| MKX          | 0.65  | -0.2086 | 0.0005  |
| PROCR        | 0.833 | -0.2086 | 0.0055  |
| SLPI         | 0.875 | -0.2086 | 0.0161  |
| RN7SL268P    | 0     | -0.2085 | 0.0037  |
| NPHP4        | 0.803 | -0.2084 | 0.0037  |
| GRXCR2       | 0.589 | -0.2083 | 0.008   |
| CALD1        | 0.879 | -0.2083 | 0.0122  |
| MDFIC        | 0.766 | -0.2082 | 0.0009  |
| UBAP1        | 0.705 | -0.2081 | 0.0005  |
| TRIAP1       | 0.731 | -0.2079 | 0.001   |
| HEMK1        | 0.889 | -0.2079 | 0.0172  |
| MTURN        | 0.519 | -0.2079 | 0.0315  |

|              |       |         |         |
|--------------|-------|---------|---------|
| RASSF8       | 0.77  | -0.2077 | 0.0021  |
| PLAUR        | 0.903 | -0.2077 | 0.0311  |
| LOC100996251 | 0.386 | -0.2077 | <0.0001 |
| MIR96        | 0     | -0.2076 | 0.0247  |
| SPTLC3       | 0.703 | -0.2075 | 0.0006  |
| FAM78A       | 0.869 | -0.2074 | 0.0325  |
| MYH3         | 0.912 | -0.2074 | 0.0418  |
| FAM92A1P2    | 0.191 | -0.2073 | 0.0012  |
| ZNF418       | 0.835 | -0.2073 | 0.0177  |
| PTPRE        | 0.743 | -0.2071 | 0.0011  |
| LGALS2       | 0.896 | -0.2071 | 0.0181  |
| HIPK3        | 0.916 | -0.207  | 0.0346  |
| EXOC5P1      | 0     | -0.2069 | 0.004   |
| IQSEC3       | 0.596 | -0.2069 | <0.0001 |
| PPTC7        | 0.593 | -0.2067 | 0.0002  |
| VN1R2        | 0.65  | -0.2067 | 0.0007  |
| ZNF814       | 0.526 | -0.2067 | 0.0012  |
| P4HTM        | 0.68  | -0.2067 | 0.0026  |
| RN7SL55P     | 0     | -0.2067 | 0.004   |
| HOXB6        | 0.889 | -0.2067 | 0.0139  |
| KRTAP12-4    | 0.622 | -0.2066 | 0.001   |
| KRT18P25     | 0.338 | -0.2066 | 0.0073  |
| BBIP1        | 0.781 | -0.2065 | 0.043   |
| LRRN4        | 0.698 | -0.2064 | 0.0023  |
| ADCY7        | 0.861 | -0.2064 | 0.0076  |
| TMEM176B     | 0.63  | -0.2063 | 0.0001  |
| ACAT2        | 0.706 | -0.2063 | 0.0002  |
| GOLT1A       | 0.711 | -0.2062 | 0.0008  |
| P2RX5        | 0.87  | -0.2062 | 0.0141  |
| SOD3         | 0.871 | -0.2062 | 0.0154  |
| MIR200B      | 0.417 | -0.2062 | <0.0001 |
| GGCX         | 0.848 | -0.2061 | 0.0055  |
| BAG1         | 0.891 | -0.2061 | 0.0161  |

|              |       |         |         |
|--------------|-------|---------|---------|
| SHROOM2      | 0.907 | -0.2061 | 0.0385  |
| TBX1         | 0.673 | -0.206  | 0.0003  |
| OR56B1       | 0.76  | -0.2059 | 0.0124  |
| GJC2         | 0.641 | -0.2058 | 0.0003  |
| MGC2889      | 0.639 | -0.2057 | 0.0405  |
| DUXAP1       | 0.465 | -0.2056 | 0.0076  |
| IGSF22       | 0.858 | -0.2056 | 0.0133  |
| WVOX         | 0.891 | -0.2056 | 0.0243  |
| PPP1R26      | 0.663 | -0.2054 | 0.0124  |
| OCEL1        | 0.862 | -0.2054 | 0.0132  |
| DENND4C      | 0.625 | -0.2054 | <0.0001 |
| CSH1         | 0.658 | -0.2051 | 0.0004  |
| SMCR5        | 0.599 | -0.2051 | 0.0017  |
| KCNK3        | 0.865 | -0.2051 | 0.008   |
| RN7SKP258    | 0     | -0.205  | 0.0039  |
| TMEM217      | 0.809 | -0.2049 | 0.0231  |
| DCLK2        | 0.631 | -0.2048 | <0.0001 |
| OR2L1P       | 0.763 | -0.2047 | 0.0256  |
| LOC100287175 | 0.499 | -0.2047 | 0.0302  |
| GRAP2        | 0.732 | -0.2046 | 0.0005  |
| HES3         | 0.645 | -0.2046 | 0.0021  |
| NOBOX        | 0.756 | -0.2046 | 0.0079  |
| MIR210       | 0.527 | -0.2046 | 0.0177  |
| CCR5         | 0.908 | -0.2046 | 0.0353  |
| CYMP         | 0.747 | -0.2046 | 0.0362  |
| BPI          | 0.846 | -0.2045 | 0.0127  |
| DRD1         | 0.904 | -0.2045 | 0.0235  |
| CAMK1D       | 0.788 | -0.2044 | 0.0016  |
| HADHA        | 0.899 | -0.2043 | 0.0221  |
| AZU1         | 0.865 | -0.2042 | 0.0081  |
| VWA5A        | 0.566 | -0.2041 | 0.0005  |
| FLG-AS1      | 0.599 | -0.204  | 0.0487  |
| LOC728196    | 0     | -0.204  | <0.0001 |

|              |       |         |         |
|--------------|-------|---------|---------|
| NLGN3        | 0.868 | -0.2039 | 0.0183  |
| OR13C4       | 0.737 | -0.2038 | 0.0056  |
| FGF10        | 0.848 | -0.2037 | 0.014   |
| MIR138-1     | 0.648 | -0.2037 | 0.0378  |
| KNDC1        | 0.717 | -0.2036 | 0.001   |
| FAM71D       | 0.67  | -0.2036 | 0.0011  |
| TGFB1I1      | 0.764 | -0.2036 | 0.0015  |
| DNAJB9       | 0.824 | -0.2036 | 0.0044  |
| COMMD6       | 0.908 | -0.2036 | 0.0474  |
| LOC100996385 | 0     | -0.2035 | 0.0002  |
| AVIL         | 0.799 | -0.2035 | 0.0023  |
| CYP26C1      | 0.73  | -0.2034 | 0.0041  |
| RUSC2        | 0.878 | -0.2033 | 0.0222  |
| FAM205A      | 0     | -0.2032 | <0.0001 |
| LOC100130992 | 0.39  | -0.2032 | <0.0001 |
| ODF3L2       | 0.569 | -0.2031 | 0.0014  |
| RN7SKP197    | 0     | -0.2031 | 0.0093  |
| MIR1302-1    | 0.292 | -0.2028 | 0.0004  |
| THSD7B       | 0.761 | -0.2028 | 0.0054  |
| NPAS3        | 0.708 | -0.2027 | 0.0007  |
| LOC541473    | 0.596 | -0.2027 | 0.0319  |
| MIR135A2     | 0.29  | -0.2023 | 0.0001  |
| NLRP8        | 0.708 | -0.2023 | 0.0022  |
| GH1          | 0.918 | -0.2023 | 0.045   |
| UMOD         | 0.864 | -0.2022 | 0.0145  |
| NEUROD6      | 0.755 | -0.202  | 0.0025  |
| CNTN1        | 0.837 | -0.202  | 0.0051  |
| LRP2BP       | 0.861 | -0.202  | 0.0101  |
| CEACAM8      | 0.896 | -0.2019 | 0.0232  |
| CACNA2D2     | 0.841 | -0.2018 | 0.0049  |
| CSNK1A1P1    | 0.355 | -0.2018 | <0.0001 |
| KATNAL1      | 0.846 | -0.2017 | 0.0123  |
| GPR179       | 0.83  | -0.2017 | 0.0292  |

|              |       |         |         |
|--------------|-------|---------|---------|
| RN7SL265P    | 0     | -0.2016 | 0.005   |
| C2orf72      | 0.803 | -0.2016 | 0.0444  |
| SLAMF1       | 0.884 | -0.2015 | 0.0236  |
| SCN3B        | 0.506 | -0.2014 | <0.0001 |
| SLF2         | 0     | -0.2013 | 0.0062  |
| TNFAIP8L1    | 0.804 | -0.2013 | 0.0114  |
| BTBD17       | 0.62  | -0.2011 | 0.0024  |
| C5orf52      | 0.564 | -0.2011 | 0.0368  |
| TIMP1        | 0.906 | -0.2011 | 0.0389  |
| GALNT9       | 0.686 | -0.2008 | 0.0007  |
| KCNMB2       | 0.866 | -0.2008 | 0.0127  |
| VWC2L-IT1    | 0     | -0.2007 | 0.0052  |
| MFN2         | 0.847 | -0.2007 | 0.0081  |
| XPNPEP2      | 0.433 | -0.2007 | <0.0001 |
| VEGFC        | 0.776 | -0.2006 | 0.0032  |
| SMIM6        | 0.066 | -0.2006 | <0.0001 |
| KCNAB1-AS1   | 0.484 | -0.2005 | 0.0053  |
| ZNF705B      | 0.298 | -0.2004 | 0.0034  |
| STAC         | 0.864 | -0.2003 | 0.0165  |
| LOC100128164 | 0.637 | -0.2003 | 0.0364  |
| SGMS1-AS1    | 0     | -0.2002 | 0.0086  |
| PMP22        | 0.856 | -0.2002 | 0.0132  |
| SPEG         | 0.827 | -0.2001 | 0.0184  |
| LOC100131257 | 0.154 | -0.1998 | 0.0004  |
| SLC27A1      | 0.654 | -0.1997 | 0.001   |
| ARHGAP29     | 0.901 | -0.1997 | 0.0288  |
| LOC100631378 | 0.209 | -0.1996 | 0.0001  |
| GBP3         | 0.754 | -0.1996 | 0.0026  |
| NLRP6        | 0.789 | -0.1996 | 0.009   |
| SLC38A3      | 0.883 | -0.1996 | 0.0339  |
| CCDC57       | 0.723 | -0.1995 | 0.0006  |
| LINC00304    | 0.328 | -0.1995 | <0.0001 |
| IGHD2-2      | 0     | -0.1994 | 0.0051  |

|              |       |         |         |
|--------------|-------|---------|---------|
| SLC35G3      | 0.569 | -0.1994 | 0.0212  |
| NPHP3-AS1    | 0.397 | -0.1993 | <0.0001 |
| LOC101927709 | 0     | -0.1992 | 0.0003  |
| RIN3         | 0.871 | -0.1992 | 0.0232  |
| ABTB2        | 0.813 | -0.1991 | 0.004   |
| TBC1D23      | 0.788 | -0.1991 | 0.0089  |
| UTP14C       | 0.851 | -0.199  | 0.0464  |
| PSD          | 0.808 | -0.1989 | 0.0047  |
| LINC01393    | 0     | -0.1989 | <0.0001 |
| KCNK15       | 0.725 | -0.1986 | 0.0006  |
| CASP9        | 0.833 | -0.1986 | 0.0048  |
| RNF167       | 0.791 | -0.1986 | 0.0087  |
| TRPM7        | 0.878 | -0.1986 | 0.0429  |
| DEFB108B     | 0.752 | -0.1985 | 0.0126  |
| KRTAP4-6     | 0.516 | -0.1985 | 0.0173  |
| POLR2A       | 0.902 | -0.1985 | 0.0476  |
| LINC00106    | 0.393 | -0.1984 | 0.0029  |
| CAST         | 0.71  | -0.1983 | 0.001   |
| LOC100049716 | 0.337 | -0.1983 | <0.0001 |
| RAP1GAP2     | 0.558 | -0.1982 | 0.0011  |
| IBTK         | 0.769 | -0.1982 | 0.0017  |
| UBXN6        | 0.635 | -0.1982 | 0.0091  |
| OR52N4       | 0.742 | -0.1982 | 0.0124  |
| STARD4       | 0.853 | -0.1982 | 0.0297  |
| RPL31P11     | 0.384 | -0.1979 | 0.0012  |
| ESR2         | 0.869 | -0.1979 | 0.0121  |
| CLDN22       | 0.728 | -0.1979 | 0.0265  |
| MIR129-1     | 0     | -0.1977 | 0.0002  |
| ZSWIM2       | 0.683 | -0.1977 | 0.0025  |
| SIRPB2       | 0.713 | -0.1977 | 0.0025  |
| MIR299       | 0.611 | -0.1975 | 0.0337  |
| SMAP2        | 0.64  | -0.1974 | 0.0026  |
| LINC00608    | 0.177 | -0.1973 | <0.0001 |



|           |       |         |         |
|-----------|-------|---------|---------|
| PP2D1     | 0.693 | -0.1972 | 0.032   |
| CHRNA9    | 0.77  | -0.1971 | 0.0021  |
| HTR6      | 0.862 | -0.1971 | 0.0102  |
| SH3TC2    | 0.686 | -0.197  | 0.0007  |
| CACNA2D4  | 0.804 | -0.197  | 0.0065  |
| RPL7P3    | 0     | -0.197  | 0.0104  |
| OR2M1P    | 0     | -0.197  | <0.0001 |
| ATP8A1    | 0.623 | -0.197  | <0.0001 |
| HCRTR1    | 0.778 | -0.1969 | 0.0022  |
| LINC00686 | 0     | -0.1969 | 0.0029  |
| KRTAP10-5 | 0.798 | -0.1969 | 0.0195  |
| CRYM      | 0.91  | -0.1969 | 0.0363  |
| KIR2DL4   | 0.862 | -0.1968 | 0.0113  |
| CTRC      | 0.92  | -0.1967 | 0.0466  |
| RNU6-605P | 0     | -0.1964 | 0.0063  |
| SORCS1    | 0.787 | -0.1964 | 0.0114  |
| TEPSIN    | 0.362 | -0.1963 | 0.0094  |
| GPX1P1    | 0     | -0.1961 | 0.0107  |
| PRTN3     | 0.899 | -0.1961 | 0.0377  |
| GPHB5     | 0.739 | -0.196  | 0.004   |
| TMEM179   | 0.775 | -0.196  | 0.0098  |
| C10orf71  | 0.754 | -0.1959 | 0.0106  |
| TSPYL4    | 0.854 | -0.1959 | 0.0183  |
| EVPLL     | 0.737 | -0.1959 | 0.0246  |
| OR5AZ1P   | 0     | -0.1958 | 0.0064  |
| SENP8     | 0.79  | -0.1958 | 0.0103  |
| ANTXR1    | 0.862 | -0.1958 | 0.0112  |
| MCTS2P    | 0.415 | -0.1958 | 0.0122  |
| POU5F1B   | 0.756 | -0.1958 | 0.0356  |
| CHST3     | 0.758 | -0.1957 | 0.0016  |
| IL25      | 0.761 | -0.1957 | 0.0019  |
| RN7SL334P | 0.308 | -0.1957 | 0.0065  |
| MTND4P9   | 0     | -0.1957 | 0.011   |

|              |       |         |         |
|--------------|-------|---------|---------|
| TBC1D3P2     | 0     | -0.1957 | <0.0001 |
| LINC01405    | 0.004 | -0.1957 | <0.0001 |
| EMILIN3      | 0.772 | -0.1955 | 0.006   |
| LOC102724511 | 0     | -0.1954 | 0.0004  |
| LGI4         | 0.816 | -0.1954 | 0.0087  |
| LOC101929512 | 0     | -0.1953 | 0.0004  |
| PTPRT        | 0.816 | -0.1953 | 0.0067  |
| PTH2         | 0.725 | -0.1953 | 0.0118  |
| NAPEPLD      | 0.796 | -0.1953 | 0.0193  |
| IDH2         | 0.879 | -0.1952 | 0.0173  |
| PNPLA5       | 0.818 | -0.1952 | 0.0201  |
| LOC440040    | 0.098 | -0.1951 | <0.0001 |
| WNT7B        | 0.654 | -0.195  | 0.0007  |
| RYBP         | 0.713 | -0.195  | 0.0015  |
| SFT2D1       | 0.806 | -0.195  | 0.0134  |
| SYCE1L       | 0.76  | -0.195  | 0.0189  |
| SLC4A1       | 0.869 | -0.195  | 0.0265  |
| ADAM6        | 0.861 | -0.195  | 0.0422  |
| ZFP36L2      | 0.885 | -0.1949 | 0.0291  |
| BNIP3        | 0.895 | -0.1948 | 0.0274  |
| ADAMTSL1     | 0.829 | -0.1947 | 0.0121  |
| DECR2        | 0.87  | -0.1947 | 0.0204  |
| PRDM5        | 0.637 | -0.1946 | 0.0003  |
| PLCD1        | 0.882 | -0.1946 | 0.0288  |
| TMEM158      | 0.888 | -0.1946 | 0.0377  |
| FOXR1        | 0.678 | -0.1944 | 0.0012  |
| DNAJB8-AS1   | 0     | -0.1944 | <0.0001 |
| MATN4        | 0.789 | -0.1943 | 0.0028  |
| OR7E8P       | 0     | -0.1943 | 0.0069  |
| HSFY2        | 0.712 | -0.1943 | 0.0232  |
| PRDM1        | 0.875 | -0.1943 | 0.0272  |
| OR5K2        | 0.64  | -0.1942 | 0.0058  |
| ANKUB1       | 0.561 | -0.1942 | 0.024   |

|              |       |         |         |
|--------------|-------|---------|---------|
| FOXRED1      | 0.756 | -0.194  | 0.0032  |
| JPH4         | 0.735 | -0.194  | 0.0062  |
| LINC01222    | 0     | -0.194  | <0.0001 |
| CARHSP1      | 0.882 | -0.1939 | 0.0219  |
| SDF4         | 0.761 | -0.1938 | 0.0036  |
| CADM2-AS2    | 0     | -0.1938 | 0.007   |
| BANK1        | 0.848 | -0.1938 | 0.0096  |
| SPINK9       | 0.726 | -0.1938 | 0.0151  |
| THAP6        | 0.757 | -0.1937 | 0.0079  |
| CLDN5        | 0.889 | -0.1937 | 0.0222  |
| GRIK3        | 0.817 | -0.1936 | 0.0044  |
| COQ8B        | 0.335 | -0.1936 | 0.0091  |
| SPATA42      | 0     | -0.1936 | <0.0001 |
| FGF20        | 0.635 | -0.1935 | 0.0002  |
| LOC101927907 | 0     | -0.1934 | 0.0004  |
| SALL3        | 0.743 | -0.1934 | 0.0071  |
| GPC4         | 0.857 | -0.1934 | 0.0115  |
| PKP2         | 0.846 | -0.1934 | 0.0135  |
| RFPL1S       | 0.839 | -0.1934 | 0.0456  |
| OR10J1       | 0.712 | -0.1933 | 0.002   |
| SPHKAP       | 0.797 | -0.1933 | 0.0333  |
| TEKT3        | 0.575 | -0.1931 | 0.0004  |
| ABHD10       | 0.82  | -0.1931 | 0.0066  |
| SH2B3        | 0.873 | -0.1931 | 0.0258  |
| C16orf78     | 0.71  | -0.193  | 0.0032  |
| C10orf62     | 0.839 | -0.1928 | 0.0186  |
| SCARNA6      | 0.487 | -0.1923 | 0.0006  |
| ZC3H12D      | 0.692 | -0.1923 | 0.0046  |
| BORCS7       | 0     | -0.1923 | 0.009   |
| ESRRB        | 0.804 | -0.1922 | 0.0044  |
| SLC35A3      | 0.84  | -0.1922 | 0.0129  |
| XG           | 0.744 | -0.1921 | 0.0057  |
| POM121L12    | 0.712 | -0.1921 | 0.0222  |

|           |       |         |         |
|-----------|-------|---------|---------|
| JAGN1     | 0.864 | -0.192  | 0.0333  |
| LNX1-AS1  | 0     | -0.1919 | 0.0076  |
| RGPD4-AS1 | 0.025 | -0.1919 | <0.0001 |
| FUT10     | 0.268 | -0.1919 | <0.0001 |
| SUPT20HL2 | 0     | -0.1918 | 0.0031  |
| TTC39C    | 0.633 | -0.1918 | 0.004   |
| CD40LG    | 0.873 | -0.1918 | 0.0173  |
| LGALS3BP  | 0.886 | -0.1917 | 0.0228  |
| OR5I1     | 0.603 | -0.1916 | 0.0008  |
| OR1L4     | 0.649 | -0.1915 | 0.0069  |
| ALDH1A2   | 0.872 | -0.1915 | 0.017   |
| TNK1      | 0.888 | -0.1914 | 0.0352  |
| SERPINB12 | 0.53  | -0.1913 | 0.0004  |
| PAX5      | 0.855 | -0.1913 | 0.0169  |
| NGLY1     | 0.859 | -0.1913 | 0.0234  |
| OR2AP1    | 0.224 | -0.1912 | 0.0033  |
| LARGE-IT1 | 0     | -0.1912 | 0.0077  |
| PLAGL1    | 0.875 | -0.1912 | 0.0272  |
| TMSB4XP4  | 0     | -0.191  | 0.006   |
| OTOS      | 0.782 | -0.191  | 0.0128  |
| MIR542    | 0.451 | -0.1909 | 0.0032  |
| PLCXD2    | 0.746 | -0.1909 | 0.009   |
| IFNA13    | 0.668 | -0.1907 | 0.009   |
| LINC01167 | 0     | -0.1907 | 0.0125  |
| DDX60     | 0.858 | -0.1907 | 0.0304  |
| TTLL2     | 0.82  | -0.1906 | 0.0179  |
| RPS29P20  | 0     | -0.1905 | 0.0132  |
| DEFA5     | 0.894 | -0.1905 | 0.0338  |
| C8orf86   | 0.712 | -0.1905 | 0.0468  |
| ADAM3A    | 0.64  | -0.1904 | 0.0005  |
| SIGLEC8   | 0.767 | -0.1904 | 0.004   |
| MRPL16    | 0.785 | -0.1904 | 0.0062  |
| LOC646358 | 0     | -0.1904 | 0.0225  |

|              |       |         |         |
|--------------|-------|---------|---------|
| IFIT3        | 0.866 | -0.1902 | 0.0146  |
| LOC100130880 | 0.495 | -0.19   | 0.0008  |
| SLC15A1      | 0.847 | -0.19   | 0.0164  |
| ZMYND15      | 0.714 | -0.1899 | 0.004   |
| SGSM2        | 0.846 | -0.1899 | 0.0244  |
| KRTAP3-2     | 0.694 | -0.1897 | 0.002   |
| C1orf94      | 0.728 | -0.1897 | 0.0051  |
| IGLV11-55    | 0.389 | -0.1897 | 0.0079  |
| SLC9A7       | 0.799 | -0.1897 | 0.0082  |
| IGFBP7-AS1   | 0.469 | -0.1897 | <0.0001 |
| KCTD11       | 0.711 | -0.1896 | 0.0018  |
| HORMAD2      | 0.717 | -0.1896 | 0.0021  |
| RN7SL236P    | 0     | -0.1896 | 0.0083  |
| ANKDD1A      | 0.842 | -0.1895 | 0.0134  |
| KLHL28       | 0.873 | -0.1895 | 0.0286  |
| OR10AD1      | 0.777 | -0.1895 | 0.0328  |
| LOC101927124 | 0     | -0.1894 | 0.0006  |
| SSPN         | 0.89  | -0.1894 | 0.0376  |
| MIR1913      | 0.342 | -0.1893 | 0.0009  |
| C1QTNF2      | 0.76  | -0.1893 | 0.0042  |
| FLJ33534     | 0.664 | -0.1893 | 0.0331  |
| CFAP44-AS1   | 0     | -0.1892 | 0.0154  |
| AIFM1        | 0.895 | -0.1892 | 0.032   |
| AA06         | 0     | -0.1891 | 0.0003  |
| HSPB9        | 0.817 | -0.1891 | 0.0142  |
| FSIP2-AS1    | 0     | -0.1891 | 0.0151  |
| RASIP1       | 0.86  | -0.1891 | 0.0243  |
| WNT16        | 0.838 | -0.1889 | 0.0157  |
| CD164L2      | 0.771 | -0.1889 | 0.0249  |
| LOC100128288 | 0.619 | -0.1889 | 0.0402  |
| ASMT         | 0.904 | -0.1889 | 0.0419  |
| CEP120       | 0.701 | -0.1888 | 0.0047  |
| IFNA10       | 0.697 | -0.1886 | 0.001   |

|              |       |         |         |
|--------------|-------|---------|---------|
| NIPSNAP1     | 0.874 | -0.1886 | 0.0281  |
| MIR548I1     | 0.34  | -0.1884 | 0.0039  |
| TAS2R62P     | 0     | -0.1884 | 0.0144  |
| TMTC3        | 0.806 | -0.1884 | 0.0186  |
| RPS6KA2      | 0.823 | -0.1882 | 0.0102  |
| PHLDB1       | 0.834 | -0.1882 | 0.0181  |
| FAM20A       | 0.86  | -0.1882 | 0.0254  |
| TMEM184C     | 0.801 | -0.1882 | 0.0299  |
| MLF1         | 0.88  | -0.1882 | 0.0322  |
| IRS2         | 0.488 | -0.1882 | <0.0001 |
| PCGF5        | 0.726 | -0.1879 | 0.0062  |
| WDR44        | 0.782 | -0.1879 | 0.0064  |
| DCT          | 0.828 | -0.1879 | 0.0069  |
| LRRFIP1      | 0.883 | -0.1878 | 0.0238  |
| ELAC1        | 0.643 | -0.1877 | 0.0003  |
| MIR20B       | 0     | -0.1877 | 0.001   |
| OR4D5        | 0.56  | -0.1877 | 0.0031  |
| WNK2         | 0.772 | -0.1877 | 0.0111  |
| ZCCHC18      | 0.658 | -0.1877 | 0.0262  |
| GHSR         | 0.789 | -0.1876 | 0.0052  |
| RGL4         | 0.833 | -0.1876 | 0.0437  |
| RIPPLY1      | 0.651 | -0.1875 | 0.0033  |
| MIR376A1     | 0.319 | -0.1874 | 0.001   |
| TPD52L3      | 0.729 | -0.1873 | 0.0069  |
| LOC101927359 | 0     | -0.1872 | 0.0007  |
| LOC101927839 | 0.237 | -0.187  | 0.0007  |
| FLG2         | 0.754 | -0.187  | 0.006   |
| NPAS1        | 0.872 | -0.1869 | 0.0289  |
| GABRG1       | 0.573 | -0.1868 | 0.0002  |
| OR2A14       | 0.538 | -0.1868 | 0.0022  |
| MPC1L        | 0.108 | -0.1868 | 0.004   |
| SPATA31D3    | 0.426 | -0.1868 | 0.0078  |
| TMEM143      | 0.848 | -0.1868 | 0.0261  |

|           |       |         |         |
|-----------|-------|---------|---------|
| DUPD1     | 0.681 | -0.1866 | 0.0068  |
| TBC1D4    | 0.879 | -0.1866 | 0.0336  |
| MIR138-2  | 0     | -0.1866 | <0.0001 |
| BAALC     | 0.671 | -0.1865 | 0.0005  |
| SUCLA2    | 0.843 | -0.1865 | 0.0277  |
| LINC00550 | 0.194 | -0.1865 | <0.0001 |
| C16orf82  | 0.715 | -0.1863 | 0.0102  |
| ZNF528    | 0.543 | -0.1861 | 0.0001  |
| PAX7      | 0.802 | -0.1861 | 0.0097  |
| CIRBP     | 0.887 | -0.1861 | 0.0274  |
| MIR1255B1 | 0.493 | -0.1857 | 0.001   |
| LINC01564 | 0     | -0.1855 | 0.0148  |
| CLCA1     | 0.709 | -0.1854 | 0.0011  |
| CARD6     | 0.758 | -0.1854 | 0.0053  |
| EHMT1     | 0.829 | -0.1854 | 0.01    |
| SNORA55   | 0.457 | -0.1853 | 0.0011  |
| HSD17B4   | 0.887 | -0.1852 | 0.0287  |
| PRLH      | 0.699 | -0.1851 | 0.0024  |
| ATF7IP2   | 0.858 | -0.1851 | 0.0182  |
| LDLRAP1   | 0.856 | -0.1851 | 0.0185  |
| C17orf67  | 0.716 | -0.185  | 0.006   |
| TCEA2     | 0.846 | -0.185  | 0.0176  |
| KRT26     | 0.535 | -0.1849 | 0.0009  |
| GPR27     | 0.789 | -0.1849 | 0.0047  |
| ACR       | 0.856 | -0.1847 | 0.0259  |
| MIR330    | 0.427 | -0.1846 | 0.0005  |
| GRM7      | 0.784 | -0.1846 | 0.0129  |
| SLC25A22  | 0.86  | -0.1845 | 0.0274  |
| CXCR4     | 0.893 | -0.1844 | 0.0324  |
| TEX12     | 0.664 | -0.1843 | 0.0009  |
| KCNA7     | 0.756 | -0.1843 | 0.0059  |
| KLK5      | 0.781 | -0.1842 | 0.0052  |
| IFNA7     | 0.663 | -0.1841 | 0.0021  |

|              |       |         |         |
|--------------|-------|---------|---------|
| MBP          | 0.887 | -0.184  | 0.0286  |
| PIK3CG       | 0.887 | -0.184  | 0.0432  |
| CASC2        | 0.715 | -0.1839 | 0.0061  |
| KIR3DX1      | 0.784 | -0.1839 | 0.0096  |
| GSG1         | 0.739 | -0.1838 | 0.002   |
| LCN8         | 0.719 | -0.1838 | 0.0034  |
| RN7SKP243    | 0     | -0.1838 | 0.0096  |
| RAB33A       | 0.872 | -0.1838 | 0.0303  |
| LOC100505534 | 0.475 | -0.1837 | 0.0002  |
| LINC01628    | 0     | -0.1837 | 0.0179  |
| MIR141       | 0.57  | -0.1837 | 0.0371  |
| RASA4CP      | 0     | -0.1835 | 0.0092  |
| ITGB3        | 0.888 | -0.1835 | 0.0436  |
| LOC100506016 | 0     | -0.1834 | 0.0009  |
| FSCN3        | 0.797 | -0.1833 | 0.0079  |
| PCMT1        | 0.842 | -0.1833 | 0.018   |
| SNORA37      | 0.612 | -0.1833 | 0.0272  |
| MIR374A      | 0.083 | -0.1832 | 0.0013  |
| VTI1B        | 0.689 | -0.1829 | 0.0018  |
| MANEA        | 0.733 | -0.1829 | 0.0021  |
| LINC00443    | 0     | -0.1829 | 0.0095  |
| LYST-AS1     | 0.403 | -0.1828 | 0.011   |
| GAPDHP28     | 0.327 | -0.1828 | 0.0174  |
| BRWD1        | 0.854 | -0.1828 | 0.0213  |
| MAP3K2       | 0.856 | -0.1827 | 0.019   |
| KRTAP12-1    | 0.534 | -0.1826 | 0.0022  |
| RN7SL338P    | 0.165 | -0.1826 | 0.0111  |
| PLEKHA1      | 0.852 | -0.1825 | 0.0283  |
| MIR134       | 0.499 | -0.1824 | <0.0001 |
| CASP10       | 0.873 | -0.1823 | 0.0233  |
| HAPLN2       | 0.849 | -0.1822 | 0.0169  |
| ACTL7A       | 0.798 | -0.1821 | 0.0073  |
| LINC00643    | 0.563 | -0.182  | 0.046   |



|            |       |         |         |
|------------|-------|---------|---------|
| MIR30B     | 0.334 | -0.1819 | 0.0006  |
| RN7SL445P  | 0     | -0.1819 | 0.0113  |
| PTK6       | 0.855 | -0.1819 | 0.0318  |
| MIR30D     | 0.203 | -0.1815 | 0.0008  |
| SHANK2-AS3 | 0.364 | -0.1815 | <0.0001 |
| ZBTB8OSP1  | 0     | -0.1813 | 0.0117  |
| MORN1      | 0.826 | -0.1813 | 0.0175  |
| GPR142     | 0.77  | -0.1813 | 0.0195  |
| MIR1322    | 0.441 | -0.1812 | 0.0015  |
| IFNL4      | 0.364 | -0.181  | 0.0206  |
| CT62       | 0.339 | -0.181  | <0.0001 |
| OR6S1      | 0.64  | -0.1809 | 0.0121  |
| NRIP1      | 0.871 | -0.1809 | 0.0325  |
| HOXA1      | 0.834 | -0.1808 | 0.0101  |
| CDK17      | 0.789 | -0.1808 | 0.0399  |
| FAM3D      | 0.629 | -0.1807 | 0.0008  |
| NUP88      | 0.843 | -0.1807 | 0.0198  |
| C2orf83    | 0.526 | -0.1806 | 0.0014  |
| PIM2       | 0.866 | -0.1806 | 0.0315  |
| TTY6       | 0.416 | -0.1805 | 0.0007  |
| FBXO3      | 0.866 | -0.1805 | 0.0247  |
| KRTAP9-4   | 0.831 | -0.1805 | 0.0248  |
| CHTF8      | 0.765 | -0.1805 | 0.0297  |
| TULP2      | 0.757 | -0.1804 | 0.0067  |
| C19orf18   | 0.758 | -0.1804 | 0.0084  |
| TBL1Y      | 0.703 | -0.1803 | 0.0024  |
| PRSS37     | 0.636 | -0.1803 | 0.0106  |
| LINC00588  | 0.067 | -0.1803 | <0.0001 |
| MRPS2      | 0.81  | -0.1802 | 0.014   |
| AQP7P4     | 0.311 | -0.1802 | 0.0191  |
| CARD9      | 0.833 | -0.1802 | 0.026   |
| PROP1      | 0.722 | -0.1799 | 0.0043  |
| MIR194-2   | 0.63  | -0.1799 | 0.0405  |

|              |       |         |         |
|--------------|-------|---------|---------|
| RN7SL382P    | 0.197 | -0.1798 | 0.0123  |
| GPRIN3       | 0.818 | -0.1798 | 0.0177  |
| ADAM28       | 0.813 | -0.1797 | 0.0089  |
| MIR296       | 0.443 | -0.1796 | 0.0009  |
| MIOS         | 0.747 | -0.1796 | 0.0108  |
| TMEM30CP     | 0     | -0.1796 | 0.0176  |
| PPM1H        | 0.75  | -0.1795 | 0.0062  |
| CELA1        | 0.725 | -0.1795 | 0.0335  |
| OR4F15       | 0.538 | -0.1794 | 0.0059  |
| VSTM2L       | 0.716 | -0.1793 | 0.0074  |
| APP          | 0.881 | -0.1793 | 0.0292  |
| LAMA1        | 0.551 | -0.1793 | <0.0001 |
| RNA5SP155    | 0.335 | -0.1792 | 0.0074  |
| TNR          | 0.875 | -0.1791 | 0.0351  |
| LOC101927815 | 0     | -0.1789 | 0.0012  |
| RAX          | 0.762 | -0.1788 | 0.0139  |
| VN1R3        | 0.63  | -0.1788 | 0.0266  |
| DPPA3P2      | 0.282 | -0.1785 | 0.0067  |
| MAP1LC3B     | 0.833 | -0.1785 | 0.016   |
| LINC00320    | 0.132 | -0.1785 | <0.0001 |
| PRG3         | 0.78  | -0.1784 | 0.011   |
| TMEM97P1     | 0     | -0.1783 | 0.0203  |
| TBC1D28      | 0.773 | -0.1783 | 0.0414  |
| OR4C3        | 0.683 | -0.1782 | 0.0174  |
| MIR6728      | 0     | -0.1782 | 0.0226  |
| SLC16A14     | 0.81  | -0.1782 | 0.0265  |
| FTOP1        | 0.117 | -0.1781 | 0.0205  |
| MIR132       | 0.182 | -0.178  | <0.0001 |
| MIR362       | 0.324 | -0.1779 | 0.0018  |
| PARD6A       | 0.75  | -0.1779 | 0.0057  |
| RELL1        | 0.825 | -0.1779 | 0.0388  |
| ANKH         | 0.732 | -0.1777 | 0.0031  |
| CRYBG3       | 0.733 | -0.1777 | 0.0197  |

|              |       |         |         |
|--------------|-------|---------|---------|
| SIGLEC12     | 0.773 | -0.1776 | 0.0376  |
| SH2D4A       | 0.675 | -0.1775 | 0.0019  |
| CHURC1       | 0.653 | -0.1775 | 0.0058  |
| CD5          | 0.896 | -0.1775 | 0.0416  |
| LINC00710    | 0.356 | -0.1775 | <0.0001 |
| MIR1-1       | 0.435 | -0.1775 | <0.0001 |
| SLC39A12-AS1 | 0.421 | -0.1774 | 0.0173  |
| MAML3        | 0.759 | -0.1773 | 0.0045  |
| DNAJC17      | 0.803 | -0.1772 | 0.0091  |
| HIGD1AP16    | 0     | -0.1772 | 0.0211  |
| FAM71B       | 0.723 | -0.1771 | 0.0085  |
| FGF1         | 0.851 | -0.1771 | 0.0173  |
| LINC01226    | 0.357 | -0.177  | 0.0011  |
| TMC3         | 0.578 | -0.177  | 0.0052  |
| OR4D10       | 0.654 | -0.177  | 0.0148  |
| USP32P3      | 0.129 | -0.1769 | 0.0118  |
| KCNJ1        | 0.863 | -0.1769 | 0.0198  |
| ZC3H6        | 0.848 | -0.1769 | 0.0467  |
| C10orf53     | 0.791 | -0.1768 | 0.0167  |
| UGT2A3       | 0.675 | -0.1767 | 0.0022  |
| CNR2         | 0.881 | -0.1767 | 0.0344  |
| OR8J3        | 0.68  | -0.1767 | 0.0364  |
| KRTAP10-10   | 0.581 | -0.1766 | 0.0026  |
| G3BP2        | 0.881 | -0.1766 | 0.033   |
| PRB3         | 0.853 | -0.1766 | 0.0472  |
| MYF5         | 0.681 | -0.1765 | 0.0032  |
| AKR1E2       | 0.262 | -0.1764 | <0.0001 |
| B3GALT2      | 0.752 | -0.1762 | 0.0036  |
| WDR90        | 0.757 | -0.1762 | 0.0163  |
| LYZL1        | 0.675 | -0.1761 | 0.0081  |
| TMEM232      | 0.653 | -0.1761 | 0.0131  |
| RN7SL430P    | 0     | -0.1761 | 0.0142  |
| DKFZP434A062 | 0.722 | -0.176  | 0.0497  |

|              |       |         |        |
|--------------|-------|---------|--------|
| SLC16A7      | 0.712 | -0.1759 | 0.0045 |
| LMO4         | 0.842 | -0.1759 | 0.0163 |
| RGPD6        | 0.536 | -0.1759 | 0.0419 |
| FUT5         | 0.901 | -0.1759 | 0.0471 |
| KCNK7        | 0.75  | -0.1758 | 0.0031 |
| ASB2         | 0.831 | -0.1758 | 0.0221 |
| CCDC144A     | 0.769 | -0.1757 | 0.0075 |
| ARHGAP26-IT1 | 0.453 | -0.1757 | 0.0142 |
| NLGN4Y       | 0.594 | -0.1755 | 0.0006 |
| LOC101928861 | 0.38  | -0.1755 | 0.0014 |
| A2ML1        | 0.864 | -0.1753 | 0.0459 |
| FBXO40       | 0.796 | -0.1752 | 0.0077 |
| SPACA5B      | 0     | -0.1751 | 0.0003 |
| RNA5SP23     | 0     | -0.1751 | 0.0161 |
| CBLN4        | 0.723 | -0.175  | 0.0048 |
| PGPEP1       | 0.777 | -0.175  | 0.01   |
| HILS1        | 0.682 | -0.175  | 0.0187 |
| TNIP3        | 0.623 | -0.1749 | 0.001  |
| C1QL3        | 0.627 | -0.1749 | 0.0034 |
| IFT74        | 0.777 | -0.1748 | 0.0062 |
| SYTL1        | 0.744 | -0.1748 | 0.0117 |
| RNU6ATAC9P   | 0     | -0.1748 | 0.0137 |
| RNU6-121P    | 0     | -0.1746 | 0.0151 |
| TOLLIP       | 0.835 | -0.1746 | 0.0255 |
| LINC01525    | 0     | -0.1745 | 0.0223 |
| KRTAP13-1    | 0.672 | -0.1744 | 0.0053 |
| DNAJC4       | 0.844 | -0.1744 | 0.017  |
| USP51        | 0.675 | -0.1743 | 0.0075 |
| ZNF649       | 0.716 | -0.1743 | 0.0091 |
| CAPN5        | 0.855 | -0.1743 | 0.0277 |
| LOC101928283 | 0     | -0.1742 | 0.0016 |
| ZNF827       | 0.57  | -0.1742 | 0.0031 |
| CA14         | 0.795 | -0.1742 | 0.0084 |
| DCD          | 0.843 | -0.1742 | 0.0363 |

|              |       |         |         |
|--------------|-------|---------|---------|
| CTSF         | 0.885 | -0.1742 | 0.0373  |
| PLXNB2       | 0.706 | -0.1741 | 0.0046  |
| FOXB1        | 0.727 | -0.174  | 0.0031  |
| PRINS        | 0     | -0.174  | 0.0318  |
| IP6K3        | 0.829 | -0.1739 | 0.046   |
| NMD3         | 0.828 | -0.1738 | 0.0253  |
| NTN1         | 0.849 | -0.1737 | 0.0279  |
| CD300LB      | 0.8   | -0.1736 | 0.0155  |
| RTL1         | 0.692 | -0.1735 | 0.0274  |
| RNF151       | 0.606 | -0.1734 | 0.0038  |
| BPY2         | 0.43  | -0.1733 | <0.0001 |
| BMP2         | 0.891 | -0.1732 | 0.0459  |
| ZSCAN23      | 0.378 | -0.1732 | <0.0001 |
| IGF1R        | 0.799 | -0.1731 | 0.0082  |
| RN7SL398P    | 0     | -0.1731 | 0.0159  |
| LOC100996671 | 0.244 | -0.173  | 0.001   |
| LOC101928386 | 0.092 | -0.173  | 0.0017  |
| GPR152       | 0.656 | -0.1728 | 0.0085  |
| CTAGE1       | 0.691 | -0.1727 | 0.0023  |
| CHST8        | 0.785 | -0.1727 | 0.0072  |
| MIR506       | 0.121 | -0.1726 | 0.0098  |
| MDM2         | 0.866 | -0.1725 | 0.028   |
| ATXN8OS      | 0.81  | -0.1725 | 0.0344  |
| SENP6        | 0.817 | -0.1724 | 0.0214  |
| BRD7P3       | 0.768 | -0.1724 | 0.0323  |
| LOC100129534 | 0.402 | -0.1723 | 0.0005  |
| WNT5B        | 0.834 | -0.1722 | 0.0217  |
| NPBWR2       | 0.626 | -0.1721 | 0.002   |
| SLC6A5       | 0.766 | -0.1721 | 0.01    |
| ACTRT2       | 0.617 | -0.172  | 0.0027  |
| TSPAN1       | 0.765 | -0.172  | 0.0075  |
| GFRA4        | 0.787 | -0.1719 | 0.0101  |
| HSBP1P2      | 0.475 | -0.1719 | 0.0141  |
| PTPN2        | 0.878 | -0.1719 | 0.0493  |

|              |       |         |         |
|--------------|-------|---------|---------|
| MIR1231      | 0.3   | -0.1716 | 0.0033  |
| OPN1MW       | 0.356 | -0.1714 | 0.0003  |
| RN7SL459P    | 0.464 | -0.1714 | 0.0173  |
| SDHDP6       | 0     | -0.1714 | 0.0257  |
| ASS1P12      | 0     | -0.1713 | 0.0257  |
| MIR302F      | 0.496 | -0.1712 | 0.0029  |
| KIF25        | 0.754 | -0.1712 | 0.0051  |
| SYCP1        | 0.855 | -0.1712 | 0.0332  |
| TAS2R41      | 0.773 | -0.1711 | 0.0282  |
| KNCN         | 0.579 | -0.171  | 0.0015  |
| HDHD2        | 0.79  | -0.171  | 0.0157  |
| PNLIPRP1     | 0.871 | -0.171  | 0.0442  |
| CDH15        | 0.789 | -0.1709 | 0.0099  |
| ATP2B3       | 0.872 | -0.1709 | 0.0331  |
| TRDMT1       | 0.615 | -0.1708 | 0.0013  |
| SPINT1       | 0.79  | -0.1708 | 0.0145  |
| MIR222HG     | 0.155 | -0.1708 | 0.0284  |
| FUT8         | 0.87  | -0.1708 | 0.0326  |
| VAV3         | 0.783 | -0.1707 | 0.0134  |
| NKX2-8       | 0.686 | -0.1703 | 0.0041  |
| RNPS1P1      | 0     | -0.1703 | 0.0266  |
| HPSE         | 0.869 | -0.1703 | 0.0343  |
| LINC01513    | 0     | -0.1702 | 0.0258  |
| MRGPRX1      | 0.776 | -0.1702 | 0.0283  |
| ABCB1        | 0.825 | -0.1701 | 0.0135  |
| SPACA3       | 0.668 | -0.1699 | 0.0077  |
| C1QTNF4      | 0.843 | -0.1698 | 0.0314  |
| LOC100128108 | 0.471 | -0.1697 | 0.0002  |
| MYT1L        | 0.631 | -0.1697 | 0.0018  |
| GK2          | 0.615 | -0.1696 | 0.0009  |
| UBA7         | 0.739 | -0.1696 | 0.0489  |
| C17orf97     | 0.6   | -0.1695 | 0.0057  |
| LOC100129034 | 0.197 | -0.1695 | <0.0001 |
| TREML2       | 0.756 | -0.1694 | 0.0091  |

|              |       |         |         |
|--------------|-------|---------|---------|
| WFIKKN1      | 0.76  | -0.1694 | 0.0163  |
| MIR17HG      | 0.417 | -0.1693 | <0.0001 |
| QKI          | 0.832 | -0.1692 | 0.0307  |
| PRICKLE2-AS2 | 0.465 | -0.1691 | 0.0158  |
| TPTE2        | 0.738 | -0.1691 | 0.032   |
| GFRAL        | 0.581 | -0.169  | 0.0037  |
| USP50        | 0.72  | -0.169  | 0.0232  |
| KIRREL3-AS2  | 0.375 | -0.1689 | 0.0001  |
| SCN2B        | 0.637 | -0.1689 | 0.0025  |
| SLC43A1      | 0.824 | -0.1689 | 0.0224  |
| CD3G         | 0.872 | -0.1688 | 0.0349  |
| STON2        | 0.826 | -0.1688 | 0.0443  |
| COLQ         | 0.842 | -0.1687 | 0.0231  |
| CGB5         | 0.725 | -0.1687 | 0.049   |
| LDB3         | 0.767 | -0.1686 | 0.0067  |
| MIR513A2     | 0     | -0.1686 | 0.0076  |
| FEM1C        | 0.807 | -0.1686 | 0.0136  |
| NDRG4        | 0.783 | -0.1686 | 0.0141  |
| OMP          | 0.833 | -0.1686 | 0.0349  |
| BTN3A3       | 0.843 | -0.1685 | 0.0195  |
| VPS4B        | 0.803 | -0.1684 | 0.0202  |
| SNORA8       | 0     | -0.1683 | 0.0041  |
| PGLYRP3      | 0.529 | -0.1682 | 0.0018  |
| CDC42EP5     | 0.804 | -0.1682 | 0.0204  |
| NRK          | 0.826 | -0.1682 | 0.0479  |
| SNORD35B     | 0.48  | -0.1677 | 0.0123  |
| SOCS1        | 0.795 | -0.1676 | 0.0164  |
| RAB30        | 0.852 | -0.1676 | 0.0358  |
| CRYGC        | 0.876 | -0.1676 | 0.0423  |
| DCPS         | 0.638 | -0.1675 | 0.001   |
| LOC101928052 | 0     | -0.1675 | 0.0023  |
| RGS9         | 0.713 | -0.1675 | 0.0059  |
| HR           | 0.737 | -0.1674 | 0.0043  |
| GPR45        | 0.707 | -0.1673 | 0.0026  |

|           |       |         |         |
|-----------|-------|---------|---------|
| SMG6      | 0.804 | -0.1673 | 0.0221  |
| OR52P1P   | 0     | -0.1672 | 0.0199  |
| KCND1     | 0.866 | -0.1672 | 0.035   |
| ANKRD54P1 | 0.022 | -0.1671 | 0.0298  |
| HOXD12    | 0.798 | -0.167  | 0.015   |
| FUT7      | 0.833 | -0.167  | 0.0172  |
| OR7A15P   | 0     | -0.167  | 0.02    |
| FOXD3     | 0.775 | -0.1669 | 0.0108  |
| RNU6-767P | 0     | -0.1668 | 0.0202  |
| GBP6      | 0.701 | -0.1667 | 0.0053  |
| MDH1B     | 0.709 | -0.1667 | 0.006   |
| RFX4      | 0.654 | -0.1666 | 0.0052  |
| TSPAN13   | 0.85  | -0.1665 | 0.038   |
| FAM71E2   | 0.798 | -0.1665 | 0.0411  |
| MIR1179   | 0.499 | -0.1664 | 0.0003  |
| BEX5      | 0.651 | -0.1659 | 0.0033  |
| RLBP1     | 0.846 | -0.1659 | 0.0368  |
| CD300LD   | 0.397 | -0.1659 | <0.0001 |
| LINC00284 | 0.224 | -0.1657 | 0.0012  |
| CNPY1     | 0.746 | -0.1657 | 0.0195  |
| PGAM4P1   | 0     | -0.1657 | 0.031   |
| TMC6      | 0.845 | -0.1657 | 0.0338  |
| ZNF311    | 0.781 | -0.1656 | 0.0306  |
| SPATA7    | 0.513 | -0.1655 | 0.0004  |
| CRYM-AS1  | 0.187 | -0.1654 | 0.0076  |
| THNSL2    | 0.588 | -0.1653 | 0.0031  |
| PCDH1     | 0.791 | -0.1653 | 0.0147  |
| ERN2      | 0.842 | -0.1653 | 0.0293  |
| HMGN1P12  | 0     | -0.1652 | 0.0315  |
| PLXDC2    | 0.691 | -0.1651 | 0.0084  |
| MEIS3     | 0.764 | -0.1651 | 0.0189  |
| MCPH1     | 0.865 | -0.1651 | 0.0409  |
| LINC01445 | 0.322 | -0.165  | 0.031   |
| CST13P    | 0.406 | -0.165  | <0.0001 |



|            |       |         |         |
|------------|-------|---------|---------|
| LIPK       | 0.598 | -0.1649 | 0.0065  |
| DEFB113    | 0.59  | -0.1648 | 0.0229  |
| CSNK1A1L   | 0.749 | -0.1648 | 0.0304  |
| RPL22P11   | 0     | -0.1647 | 0.0137  |
| ADAMTS15   | 0.688 | -0.1646 | 0.0058  |
| MIR7845    | 0     | -0.1645 | 0.0351  |
| KIAA0087   | 0.451 | -0.1645 | <0.0001 |
| OR9I2P     | 0.148 | -0.1643 | 0.0221  |
| OLIG1      | 0.657 | -0.1642 | 0.0101  |
| TM2D3      | 0.788 | -0.1642 | 0.0189  |
| IFNGR1     | 0.857 | -0.1642 | 0.0322  |
| OR8K5      | 0.672 | -0.1641 | 0.0299  |
| SDR9C7     | 0.757 | -0.1641 | 0.0415  |
| CCDC160    | 0.424 | -0.1641 | <0.0001 |
| OSBPL10    | 0.631 | -0.164  | 0.0023  |
| PRSS29P    | 0     | -0.164  | 0.017   |
| CITED4     | 0.67  | -0.1639 | 0.0043  |
| G6PC2      | 0.765 | -0.1639 | 0.0078  |
| CPM        | 0.815 | -0.1639 | 0.0162  |
| GSTM3P2    | 0     | -0.1639 | 0.0329  |
| OR5P3      | 0.586 | -0.1638 | 0.005   |
| CAMKK1     | 0.687 | -0.1638 | 0.0058  |
| IL1F10     | 0.677 | -0.1637 | 0.0097  |
| RN7SKP137  | 0     | -0.1637 | 0.0209  |
| CLCA4      | 0.782 | -0.1634 | 0.011   |
| PRM3       | 0.778 | -0.1634 | 0.0339  |
| GCOM1      | 0.672 | -0.1634 | 0.0361  |
| RALGDS     | 0.853 | -0.1634 | 0.0498  |
| TTC39C-AS1 | 0     | -0.163  | 0.0367  |
| GOLGA6L22  | 0     | -0.163  | 0.0369  |
| PTPN4      | 0.836 | -0.1629 | 0.033   |
| KRT17P1    | 0     | -0.1627 | 0.0193  |
| INSL3      | 0.69  | -0.1626 | 0.0053  |
| HCRTR2     | 0.77  | -0.1626 | 0.011   |

|            |       |         |         |
|------------|-------|---------|---------|
| FARP1-AS1  | 0     | -0.1625 | 0.0202  |
| TBCEL      | 0.812 | -0.1625 | 0.0359  |
| OR13D1     | 0.694 | -0.1625 | 0.0479  |
| PTPRQ      | 0.661 | -0.1624 | 0.0276  |
| PEX5L      | 0.763 | -0.1623 | 0.014   |
| LINC00950  | 0.483 | -0.1622 | 0.0008  |
| LOC439933  | 0     | -0.1622 | 0.0032  |
| RN7SKP69   | 0     | -0.1622 | 0.0223  |
| MRPL50P2   | 0     | -0.1621 | 0.0347  |
| PCDH9-AS4  | 0.262 | -0.162  | 0.0241  |
| PKD2L2     | 0.594 | -0.1619 | 0.003   |
| OR2A2      | 0.525 | -0.1619 | 0.0086  |
| PSG6       | 0.831 | -0.1619 | 0.0361  |
| UPK1B      | 0.664 | -0.1618 | 0.0048  |
| TTC21B-AS1 | 0     | -0.1618 | 0.033   |
| TSPAN2     | 0.662 | -0.1617 | 0.0038  |
| PCDH9-AS3  | 0     | -0.1617 | 0.0242  |
| LINC00681  | 0     | -0.1617 | 0.0243  |
| ANO9       | 0.78  | -0.1617 | 0.0364  |
| CYP4Z2P    | 0.745 | -0.1617 | 0.0402  |
| CLYBL-AS2  | 0     | -0.1616 | 0.0002  |
| DAZ3       | 0.468 | -0.1615 | 0.0011  |
| OR1E3      | 0     | -0.1615 | 0.0245  |
| SSTR2      | 0.843 | -0.1615 | 0.0388  |
| FGFR3      | 0.871 | -0.1615 | 0.0415  |
| BSPH1      | 0.444 | -0.1615 | <0.0001 |
| TGM5       | 0.79  | -0.1613 | 0.0251  |
| SPRY1      | 0.85  | -0.1613 | 0.0407  |
| VSTM2B     | 0.463 | -0.1613 | <0.0001 |
| MIR125A    | 0.442 | -0.1612 | 0.0028  |
| MUSK       | 0.818 | -0.1612 | 0.0343  |
| LINC01531  | 0     | -0.1611 | 0.03    |
| MIR1293    | 0.333 | -0.1609 | 0.0047  |
| ZNF559     | 0.712 | -0.1609 | 0.0156  |

|              |       |         |         |
|--------------|-------|---------|---------|
| IL2          | 0.843 | -0.1609 | 0.0308  |
| MYO5BP2      | 0     | -0.1609 | 0.0363  |
| OR7E105P     | 0     | -0.1608 | 0.025   |
| GPHA2        | 0.788 | -0.1607 | 0.0273  |
| ALKBH3       | 0.653 | -0.1606 | 0.0043  |
| KIF2B        | 0.833 | -0.1606 | 0.0448  |
| FLJ31356     | 0.352 | -0.1605 | 0.0011  |
| CHMP7        | 0.827 | -0.1605 | 0.0256  |
| SHOX         | 0.769 | -0.1605 | 0.0325  |
| CCDC149      | 0.619 | -0.1604 | 0.0059  |
| GLRA4        | 0.628 | -0.1604 | 0.0143  |
| DYTN         | 0.554 | -0.1604 | 0.0215  |
| CNOT7        | 0.69  | -0.1602 | 0.0036  |
| SCT          | 0.731 | -0.1602 | 0.0093  |
| HSFY1P1      | 0.414 | -0.1601 | 0.0169  |
| OR10W1       | 0.637 | -0.1601 | 0.0234  |
| SLC16A1      | 0.814 | -0.16   | 0.0268  |
| DNM1P31      | 0     | -0.16   | 0.0417  |
| FNDC11       | 0     | -0.1599 | 0.031   |
| CLRN1        | 0.779 | -0.1598 | 0.0209  |
| C20orf141    | 0.711 | -0.1596 | 0.0143  |
| RNA5SP358    | 0.418 | -0.1596 | 0.017   |
| SNX33        | 0.742 | -0.1596 | 0.038   |
| KLK12        | 0.657 | -0.1594 | 0.0032  |
| LOC101929526 | 0     | -0.1592 | 0.0038  |
| ART3         | 0.821 | -0.1591 | 0.0191  |
| CDRT15P2     | 0.272 | -0.159  | 0.0222  |
| RNU6-108P    | 0     | -0.159  | 0.0267  |
| SLC8A3       | 0.552 | -0.1589 | 0.0027  |
| NRADDP       | 0.464 | -0.1589 | 0.0167  |
| MYOG         | 0.835 | -0.1588 | 0.0378  |
| OR52B6       | 0.416 | -0.1588 | <0.0001 |
| STAC3        | 0.651 | -0.1587 | 0.008   |
| HHLA3        | 0.778 | -0.1587 | 0.0128  |

|              |       |         |         |
|--------------|-------|---------|---------|
| BRMS1L       | 0.74  | -0.1587 | 0.0147  |
| YTHDC2       | 0.834 | -0.1587 | 0.0418  |
| MCHR2-AS1    | 0     | -0.1584 | 0.0004  |
| ATP13A3      | 0.668 | -0.1584 | 0.0031  |
| LOC101927829 | 0     | -0.1584 | 0.004   |
| LCE1D        | 0.544 | -0.1584 | 0.0044  |
| OR2J2        | 0.771 | -0.1584 | 0.0255  |
| TMEM105      | 0.561 | -0.1583 | 0.0056  |
| COL12A1      | 0.717 | -0.1582 | 0.0105  |
| TMEM231      | 0.607 | -0.1582 | 0.0109  |
| GPR78        | 0.792 | -0.1582 | 0.0286  |
| AK9          | 0.428 | -0.1582 | <0.0001 |
| BEGAIN       | 0.761 | -0.1581 | 0.014   |
| HRH4         | 0.83  | -0.1581 | 0.0273  |
| MIR106A      | 0     | -0.158  | 0.0034  |
| LOC101927623 | 0     | -0.1579 | 0.0041  |
| FSCB         | 0.568 | -0.1579 | 0.0054  |
| OR51G1       | 0.665 | -0.1578 | 0.0301  |
| OR5AS1       | 0.645 | -0.1577 | 0.0498  |
| OR5AN1       | 0.525 | -0.1575 | 0.0129  |
| LINC00378    | 0.446 | -0.1575 | 0.0284  |
| GCM2         | 0.441 | -0.1574 | <0.0001 |
| SERPINB13    | 0.584 | -0.1572 | 0.0022  |
| SLFN14       | 0.66  | -0.1571 | 0.0439  |
| RN7SL538P    | 0     | -0.157  | 0.0268  |
| RN7SL168P    | 0     | -0.157  | 0.0287  |
| SLC9A5       | 0.823 | -0.157  | 0.0493  |
| LMOD3        | 0.551 | -0.1568 | 0.0014  |
| VSTM2A       | 0.5   | -0.1567 | 0.0069  |
| MBLAC2       | 0.768 | -0.1567 | 0.0408  |
| IFNA4        | 0.709 | -0.1566 | 0.0071  |
| MINPP1       | 0.774 | -0.1565 | 0.0139  |
| BSX          | 0.611 | -0.1564 | 0.0178  |
| SIAH3        | 0.669 | -0.1562 | 0.0373  |

|           |       |         |         |
|-----------|-------|---------|---------|
| NOTCH1    | 0.798 | -0.1558 | 0.0301  |
| COL13A1   | 0.852 | -0.1558 | 0.0341  |
| TCP11L2   | 0.713 | -0.1556 | 0.0202  |
| PLD5      | 0.689 | -0.1555 | 0.0147  |
| OR5AN2P   | 0     | -0.1555 | 0.0303  |
| NUP54     | 0.814 | -0.1555 | 0.0376  |
| DARS-AS1  | 0.04  | -0.1555 | 0.0418  |
| SNORD34   | 0.351 | -0.1555 | 0.0441  |
| MIR4771-1 | 0.349 | -0.1555 | 0.0469  |
| EGFL7     | 0.758 | -0.1554 | 0.0115  |
| FAT3      | 0.665 | -0.1554 | 0.0134  |
| KIAA0753  | 0.819 | -0.1554 | 0.029   |
| PABPC5    | 0.547 | -0.1552 | 0.0035  |
| MORN3     | 0.749 | -0.1552 | 0.0251  |
| MMP26     | 0.654 | -0.1549 | 0.0069  |
| ZNF582    | 0.648 | -0.1549 | 0.0099  |
| OGN       | 0.62  | -0.1548 | 0.0039  |
| HTR3D     | 0.608 | -0.1547 | 0.0109  |
| TMEM52    | 0.765 | -0.1547 | 0.0341  |
| GRIN2B    | 0.775 | -0.1546 | 0.0184  |
| NOS1      | 0.796 | -0.1546 | 0.0249  |
| RNA5SP361 | 0     | -0.1545 | 0.0208  |
| RN7SL645P | 0     | -0.1545 | 0.0314  |
| CR2       | 0.84  | -0.1545 | 0.0315  |
| HIFOO     | 0.702 | -0.1544 | 0.0186  |
| GNG8      | 0.7   | -0.1543 | 0.0123  |
| RN7SL513P | 0     | -0.1542 | 0.0316  |
| PCDHAC2   | 0.686 | -0.1542 | 0.0427  |
| PIWIL1    | 0.449 | -0.1541 | <0.0001 |
| TTC16     | 0.572 | -0.154  | 0.0045  |
| LRRC17    | 0.862 | -0.154  | 0.0435  |
| OSBPL1A   | 0.849 | -0.1539 | 0.0499  |
| NLRC5     | 0.683 | -0.1538 | 0.0154  |
| TPO       | 0.815 | -0.1538 | 0.0384  |

|              |       |         |         |
|--------------|-------|---------|---------|
| PRO1804      | 0     | -0.1537 | 0.0051  |
| ZDHHC15      | 0.673 | -0.1535 | 0.013   |
| SOST         | 0.085 | -0.1535 | <0.0001 |
| LOC102724927 | 0     | -0.1534 | 0.0053  |
| FMNL1        | 0.819 | -0.1534 | 0.026   |
| KRTAP4-5     | 0.505 | -0.1533 | 0.0015  |
| RPS6KA1      | 0.816 | -0.1532 | 0.0327  |
| CCDC125      | 0.769 | -0.1531 | 0.0303  |
| ADGRB1       | 0     | -0.1531 | 0.0357  |
| CRYAB        | 0.848 | -0.1531 | 0.0392  |
| KDM4E        | 0.144 | -0.1529 | 0.0182  |
| MTMR10       | 0.821 | -0.1529 | 0.0411  |
| PLEKHB1      | 0.737 | -0.1527 | 0.0144  |
| RNU6-331P    | 0     | -0.1526 | 0.0335  |
| KANSL1-AS1   | 0     | -0.1525 | 0.0004  |
| NLRP9        | 0.737 | -0.1525 | 0.0242  |
| SMG1P2       | 0     | -0.1525 | 0.0461  |
| RNU6-733P    | 0     | -0.1524 | 0.0336  |
| ASTL         | 0.626 | -0.1523 | 0.0101  |
| OR5M1        | 0.487 | -0.1522 | 0.0004  |
| TCAF1        | 0.317 | -0.1522 | 0.0288  |
| C5orf60      | 0.557 | -0.1521 | 0.03    |
| TSKS         | 0.764 | -0.1521 | 0.0336  |
| CCR4         | 0.832 | -0.152  | 0.0306  |
| ZNRF4        | 0.818 | -0.152  | 0.0473  |
| EVX2         | 0.642 | -0.1519 | 0.0214  |
| TPRX1        | 0.727 | -0.1517 | 0.0494  |
| HECW1-IT1    | 0.418 | -0.1515 | 0.0003  |
| LOC101928140 | 0.057 | -0.1515 | 0.0059  |
| ZRANB2-AS1   | 0.025 | -0.1513 | 0.0004  |
| LOC283177    | 0.139 | -0.1513 | 0.0036  |
| GHRL         | 0.765 | -0.1513 | 0.0255  |
| IGSF11       | 0.757 | -0.1512 | 0.0215  |
| LINC02210    | 0.354 | -0.1512 | 0.0457  |

|              |       |         |         |
|--------------|-------|---------|---------|
| OR6K6        | 0.498 | -0.1512 | <0.0001 |
| CCSER1       | 0.321 | -0.1511 | 0.0002  |
| GPRC5D       | 0.831 | -0.151  | 0.0366  |
| CELA2B       | 0.724 | -0.1509 | 0.0322  |
| OR9K1P       | 0     | -0.1508 | 0.0356  |
| GRXCR1       | 0.449 | -0.1508 | <0.0001 |
| TCP11X2      | 0.344 | -0.1507 | 0.0426  |
| RAX2         | 0.716 | -0.1506 | 0.0356  |
| RNU6-520P    | 0.2   | -0.1505 | 0.0361  |
| MPZL3        | 0.783 | -0.1504 | 0.0465  |
| RN7SKP271    | 0.306 | -0.1503 | 0.0342  |
| MIR1278      | 0.472 | -0.1502 | 0.0083  |
| ANKRD42      | 0.696 | -0.1502 | 0.0232  |
| CBLB         | 0.836 | -0.1502 | 0.0359  |
| CSHL1        | 0.795 | -0.1501 | 0.0316  |
| C3orf20      | 0.797 | -0.1501 | 0.0418  |
| PPIG         | 0.731 | -0.1499 | 0.0171  |
| LGALS13      | 0.665 | -0.1498 | 0.0057  |
| MGARP        | 0.189 | -0.1497 | 0.0002  |
| CAMK1G       | 0.695 | -0.1497 | 0.0062  |
| KRTAP22-1    | 0.629 | -0.1497 | 0.0215  |
| RBMXL3       | 0.479 | -0.1494 | 0.0006  |
| RNF186       | 0.669 | -0.1494 | 0.0081  |
| CDCP1        | 0.759 | -0.1494 | 0.0154  |
| FAM163A      | 0.398 | -0.1494 | <0.0001 |
| LOC100505716 | 0.322 | -0.1493 | 0.0042  |
| OR5T2        | 0.504 | -0.1493 | 0.0119  |
| RNU6-968P    | 0     | -0.1493 | 0.0376  |
| TXNDC2       | 0.692 | -0.1492 | 0.0333  |
| MIR1909      | 0.344 | -0.1491 | 0.0126  |
| SAMD14       | 0.731 | -0.1491 | 0.0165  |
| OR11A1       | 0.683 | -0.1489 | 0.0136  |
| RNU6-994P    | 0     | -0.1488 | 0.038   |
| EGFLAM       | 0.708 | -0.1486 | 0.0139  |

|              |       |         |        |
|--------------|-------|---------|--------|
| S100Z        | 0.695 | -0.1486 | 0.0271 |
| PALM         | 0.796 | -0.1486 | 0.0303 |
| LINC00968    | 0.15  | -0.1485 | 0.0006 |
| NUDT8        | 0.736 | -0.1484 | 0.0494 |
| TMEM229A     | 0.312 | -0.1483 | 0.0008 |
| HTR1A        | 0.75  | -0.1483 | 0.0172 |
| MS4A2        | 0.774 | -0.1483 | 0.0247 |
| RNA5SP445    | 0.251 | -0.1483 | 0.0414 |
| FAM92B       | 0.737 | -0.1483 | 0.0475 |
| MEST         | 0.856 | -0.1483 | 0.0496 |
| VWA3B        | 0.627 | -0.1482 | 0.0107 |
| HS3ST6       | 0.738 | -0.1481 | 0.0373 |
| RNU6-1080P   | 0.423 | -0.148  | 0.0394 |
| MIR144       | 0.365 | -0.1479 | 0.0061 |
| CHST15       | 0.729 | -0.1479 | 0.032  |
| RNASE3       | 0.822 | -0.1478 | 0.0493 |
| C11orf86     | 0.537 | -0.1476 | 0.017  |
| BIRC8        | 0.619 | -0.1476 | 0.017  |
| RNU4-50P     | 0     | -0.1473 | 0.04   |
| RNA5SP397    | 0     | -0.1472 | 0.0276 |
| TLL10        | 0.731 | -0.1472 | 0.0336 |
| LACTB        | 0.767 | -0.1471 | 0.0299 |
| CCT8L2       | 0.665 | -0.1468 | 0.0196 |
| CALML3-AS1   | 0.143 | -0.1467 | 0.0375 |
| KCTD9        | 0.823 | -0.1466 | 0.0485 |
| C11orf42     | 0.703 | -0.1465 | 0.02   |
| CASP6        | 0.812 | -0.1464 | 0.0361 |
| SNX19P1      | 0     | -0.1464 | 0.0414 |
| TMSB4Y       | 0.58  | -0.1463 | 0.0039 |
| C16orf89     | 0.58  | -0.1462 | 0.0131 |
| IQCF2        | 0.727 | -0.1462 | 0.0245 |
| LOC100132077 | 0     | -0.1461 | 0.0045 |
| MIR31        | 0     | -0.1461 | 0.0051 |
| NHS          | 0.634 | -0.1461 | 0.0127 |



|              |       |         |        |
|--------------|-------|---------|--------|
| S100A14      | 0.811 | -0.1461 | 0.0468 |
| CCDC88B      | 0.781 | -0.1458 | 0.0454 |
| TSPYL6       | 0.554 | -0.1457 | 0.0084 |
| NDUFA10      | 0.689 | -0.1456 | 0.0175 |
| FAM167A      | 0.611 | -0.1454 | 0.0159 |
| GPR26        | 0.696 | -0.1453 | 0.0166 |
| RNA5SP44     | 0.393 | -0.1453 | 0.0297 |
| DEFB103B     | 0.499 | -0.1452 | 0.0006 |
| LOC101929524 | 0.135 | -0.1451 | 0.0084 |
| OLAH         | 0.733 | -0.145  | 0.0203 |
| WNT4         | 0.71  | -0.1449 | 0.0168 |
| OR4M1        | 0.388 | -0.1448 | 0.0014 |
| TMEFF2       | 0.701 | -0.1447 | 0.0265 |
| ABCC13       | 0.538 | -0.1445 | 0.0057 |
| GRID1-AS1    | 0.34  | -0.1444 | 0.0009 |
| LOC101928663 | 0     | -0.1444 | 0.0087 |
| LATS2-AS1    | 0.479 | -0.1444 | 0.0445 |
| OR52A1       | 0.691 | -0.1443 | 0.0252 |
| OR4B1        | 0.556 | -0.1442 | 0.0301 |
| OR52I1       | 0.267 | -0.1441 | 0.0004 |
| MAK          | 0.579 | -0.144  | 0.0022 |
| WFDC8        | 0.645 | -0.144  | 0.012  |
| C12orf29     | 0.571 | -0.1439 | 0.0033 |
| PCDH10       | 0.672 | -0.1439 | 0.0222 |
| FTLP10       | 0.442 | -0.1439 | 0.0311 |
| FAM117A      | 0.722 | -0.1436 | 0.0132 |
| LRRC66       | 0.707 | -0.1436 | 0.0412 |
| RN7SKP11     | 0     | -0.1435 | 0.0428 |
| LOC100506497 | 0.05  | -0.1434 | 0.0061 |
| CACNG6       | 0.687 | -0.1434 | 0.0167 |
| SNORD92      | 0.405 | -0.1432 | 0.0202 |
| TMPRSS11D    | 0.588 | -0.143  | 0.0051 |
| RN7SL864P    | 0.374 | -0.1429 | 0.0465 |
| OR2F2        | 0.698 | -0.1428 | 0.0232 |

|              |       |         |         |
|--------------|-------|---------|---------|
| DSC1         | 0.596 | -0.1425 | 0.0029  |
| LARS2-AS1    | 0     | -0.1425 | 0.0415  |
| RNU6-283P    | 0     | -0.1424 | 0.0472  |
| NRG4         | 0.746 | -0.1423 | 0.0444  |
| OR1A2        | 0.681 | -0.142  | 0.0175  |
| TBC1D3I      | 0.264 | -0.142  | 0.047   |
| OR51A6P      | 0.212 | -0.1419 | 0.0481  |
| CARD14       | 0.825 | -0.1418 | 0.0454  |
| LINC00463    | 0.142 | -0.1417 | 0.0016  |
| NT5C1A       | 0.612 | -0.1416 | 0.0156  |
| OR6X1        | 0.47  | -0.1416 | <0.0001 |
| EPX          | 0.791 | -0.1415 | 0.0287  |
| DNAJC19      | 0.673 | -0.1414 | 0.0146  |
| OR10H3       | 0.738 | -0.1414 | 0.0285  |
| NRXN2        | 0.79  | -0.1414 | 0.0407  |
| VIT          | 0.618 | -0.1413 | 0.0148  |
| BMP3         | 0.673 | -0.1408 | 0.0087  |
| MRGPRE       | 0.632 | -0.1407 | 0.0448  |
| ATOH1        | 0.81  | -0.1407 | 0.0456  |
| OR10H2       | 0.758 | -0.1406 | 0.0363  |
| KBTBD7       | 0.781 | -0.1403 | 0.0445  |
| NEUROG3      | 0.62  | -0.1401 | 0.0094  |
| B4GALNT3     | 0.709 | -0.14   | 0.0196  |
| AKAP4        | 0.794 | -0.14   | 0.039   |
| FCGR1B       | 0.749 | -0.1399 | 0.0306  |
| THOC7-AS1    | 0.28  | -0.1399 | 0.0456  |
| GAL3ST3      | 0.608 | -0.1398 | 0.0093  |
| GTPBP8       | 0.818 | -0.1398 | 0.0463  |
| LOC101928519 | 0     | -0.1397 | 0.0111  |
| NYX          | 0.701 | -0.1396 | 0.0232  |
| ADAM29       | 0.664 | -0.1395 | 0.0196  |
| HOXA4        | 0.83  | -0.1395 | 0.0442  |
| CCDC182      | 0     | -0.1393 | 0.0013  |
| AP1G2        | 0.753 | -0.1393 | 0.0217  |

|           |       |         |         |
|-----------|-------|---------|---------|
| STARD8    | 0.772 | -0.1391 | 0.0386  |
| HCG24     | 0     | -0.1389 | 0.0484  |
| LOC644189 | 0.478 | -0.1388 | 0.0092  |
| GDF5OS    | 0     | -0.1386 | 0.0043  |
| BLID      | 0.606 | -0.1386 | 0.0136  |
| PAX4      | 0.704 | -0.1386 | 0.0236  |
| TCHHL1    | 0.51  | -0.138  | 0.0285  |
| HSPA4L    | 0.802 | -0.138  | 0.0407  |
| KRT36     | 0.762 | -0.1379 | 0.0252  |
| TTC17     | 0.79  | -0.1379 | 0.0497  |
| CACNG3    | 0.682 | -0.1373 | 0.0126  |
| CDCP2     | 0.645 | -0.1373 | 0.0287  |
| RNA5SP88  | 0.498 | -0.1373 | 0.0402  |
| ZNF671    | 0.696 | -0.1372 | 0.0196  |
| GBX1      | 0.733 | -0.1372 | 0.043   |
| LINC00877 | 0     | -0.1371 | 0.0025  |
| ABCA13    | 0.756 | -0.1371 | 0.0369  |
| OR1S2     | 0.457 | -0.1369 | 0.0005  |
| TRAF3IP2  | 0.718 | -0.1369 | 0.0246  |
| C1orf116  | 0.766 | -0.1369 | 0.0324  |
| MIR507    | 0.075 | -0.1369 | 0.0401  |
| SLIT2-IT1 | 0.402 | -0.1366 | 0.001   |
| AGR3      | 0.641 | -0.1364 | 0.0145  |
| ANKRD11   | 0.752 | -0.1364 | 0.025   |
| OTOR      | 0.732 | -0.1364 | 0.0336  |
| PPP1R18   | 0.472 | -0.1362 | 0.0003  |
| OR5AC2    | 0.579 | -0.136  | 0.0414  |
| OR7E47P   | 0.468 | -0.1359 | <0.0001 |
| SPATA20   | 0.672 | -0.1358 | 0.0181  |
| C2orf80   | 0.5   | -0.1357 | 0.0214  |
| TXNL4B    | 0.695 | -0.1357 | 0.0233  |
| MTNR1A    | 0.759 | -0.1357 | 0.0407  |
| FAM9A     | 0.769 | -0.1357 | 0.0493  |
| SULT1C4   | 0.686 | -0.1355 | 0.0369  |

|           |       |         |        |
|-----------|-------|---------|--------|
| TTY16     | 0.486 | -0.1352 | 0.0117 |
| ZNF843    | 0.548 | -0.1352 | 0.0256 |
| FABP9     | 0.564 | -0.1352 | 0.0273 |
| LRRC43    | 0.746 | -0.1352 | 0.0364 |
| RNA5SP238 | 0.482 | -0.1352 | 0.0431 |
| IFNA16    | 0.632 | -0.135  | 0.0104 |
| AICDA     | 0.739 | -0.135  | 0.0244 |
| CRYGN     | 0.745 | -0.135  | 0.0353 |
| TSPAN6    | 0.722 | -0.1348 | 0.044  |
| SNIP1     | 0.772 | -0.1348 | 0.0488 |
| C3orf79   | 0.391 | -0.1347 | 0.002  |
| BNC2      | 0.692 | -0.1341 | 0.0141 |
| OR4L1     | 0.339 | -0.1336 | 0.0002 |
| OR1L8     | 0.574 | -0.1336 | 0.0398 |
| OR4D1     | 0.626 | -0.1331 | 0.0343 |
| MIR192    | 0     | -0.1329 | 0.0121 |
| CCDC33    | 0.732 | -0.1329 | 0.0263 |
| TMEM176A  | 0.541 | -0.1328 | 0.006  |
| UTF1      | 0.65  | -0.1326 | 0.018  |
| MADCAM1   | 0.773 | -0.1324 | 0.0297 |
| NPS       | 0.479 | -0.1321 | 0.0097 |
| SNX18     | 0.629 | -0.1321 | 0.0489 |
| AADACL2   | 0.669 | -0.132  | 0.0215 |
| IL23R     | 0.759 | -0.1319 | 0.0463 |
| LOC93463  | 0.187 | -0.1317 | 0.0032 |
| TAS1R2    | 0.534 | -0.1316 | 0.0127 |
| TLL1      | 0.675 | -0.1316 | 0.0214 |
| TNFRSF13C | 0.72  | -0.1315 | 0.0459 |
| LINC01107 | 0.204 | -0.1314 | 0.0031 |
| IMPG1     | 0.731 | -0.131  | 0.0244 |
| RGS8      | 0.636 | -0.131  | 0.0313 |
| ATXN3L    | 0.624 | -0.1309 | 0.0128 |
| SPATA19   | 0.668 | -0.1308 | 0.0421 |
| SLC22A13  | 0.701 | -0.1307 | 0.0297 |

|              |       |         |         |
|--------------|-------|---------|---------|
| COG6         | 0.741 | -0.1307 | 0.0434  |
| KRTAP1-4     | 0.401 | -0.1306 | 0.0449  |
| TAS1R1       | 0.171 | -0.1306 | <0.0001 |
| MIR195       | 0.406 | -0.1305 | 0.021   |
| ATP1B4       | 0.568 | -0.1301 | 0.0068  |
| LRIT1        | 0.701 | -0.1299 | 0.0297  |
| DEFB114      | 0.494 | -0.1296 | <0.0001 |
| LOC100132781 | 0.135 | -0.1295 | 0.0229  |
| COX6B2       | 0.563 | -0.1293 | 0.0109  |
| TRIM64       | 0.386 | -0.1293 | 0.0212  |
| RBPJL        | 0.439 | -0.1293 | <0.0001 |
| MIR1183      | 0     | -0.1291 | 0.0232  |
| PSG2         | 0.614 | -0.129  | 0.0273  |
| C6orf15      | 0.699 | -0.129  | 0.0277  |
| CCDC144CP    | 0.005 | -0.1287 | 0.0023  |
| LOC284395    | 0.252 | -0.1286 | 0.0093  |
| AKAP5        | 0.703 | -0.1284 | 0.022   |
| VPREB3       | 0.735 | -0.1283 | 0.0394  |
| BPIFB3       | 0.254 | -0.1282 | 0.0266  |
| GPR85        | 0.754 | -0.128  | 0.0345  |
| NMRAL1       | 0.531 | -0.1279 | 0.0136  |
| LOC100132078 | 0.182 | -0.1276 | 0.013   |
| LCE2A        | 0.651 | -0.1275 | 0.0475  |
| IQUB         | 0.676 | -0.1274 | 0.0253  |
| ELP3         | 0.711 | -0.1273 | 0.0252  |
| GNG13        | 0.765 | -0.1271 | 0.0477  |
| LINC01231    | 0     | -0.1268 | 0.0212  |
| DCUN1D1      | 0.709 | -0.1266 | 0.0259  |
| C4orf47      | 0.353 | -0.1266 | <0.0001 |
| WFDC9        | 0.628 | -0.1263 | 0.0382  |
| GRIN3A       | 0.698 | -0.126  | 0.045   |
| KRTAP19-8    | 0.442 | -0.1258 | 0.0073  |
| FAM24A       | 0.633 | -0.1258 | 0.0384  |
| KDF1         | 0.446 | -0.1256 | 0.0032  |

|              |       |         |         |
|--------------|-------|---------|---------|
| SLC25A21-AS1 | 0.415 | -0.1256 | 0.0038  |
| OR7E18P      | 0     | -0.1256 | 0.0141  |
| AIPL1        | 0.668 | -0.1254 | 0.0191  |
| OR6A2        | 0.687 | -0.1254 | 0.0334  |
| OR9I1        | 0.215 | -0.1253 | 0.0005  |
| PRDM14       | 0.721 | -0.1253 | 0.0475  |
| VWC2L        | 0.215 | -0.1252 | 0.0039  |
| OR2H2        | 0.508 | -0.125  | 0.0087  |
| KRTAP1-5     | 0.593 | -0.125  | 0.0187  |
| ALOXE3       | 0.769 | -0.125  | 0.0474  |
| TUSC8        | 0.24  | -0.1246 | 0.0059  |
| OR10D1P      | 0.064 | -0.1243 | 0.0031  |
| LINC01300    | 0.465 | -0.1243 | 0.0052  |
| PAPOLB       | 0.636 | -0.1242 | 0.0264  |
| TRIM48       | 0.58  | -0.1242 | 0.0387  |
| SPAG16       | 0.619 | -0.1241 | 0.0188  |
| KCNQ5        | 0.462 | -0.124  | <0.0001 |
| OR4X2        | 0.454 | -0.1239 | 0.0004  |
| LINC01360    | 0.481 | -0.1239 | 0.0058  |
| LOC101929122 | 0     | -0.1239 | 0.0243  |
| FBXL14       | 0.758 | -0.1236 | 0.0482  |
| PTH          | 0.568 | -0.1234 | 0.0155  |
| CRYGB        | 0.719 | -0.1234 | 0.0361  |
| KERA         | 0.507 | -0.1232 | 0.0083  |
| GDNF         | 0.733 | -0.1232 | 0.037   |
| CDH20        | 0.683 | -0.1227 | 0.0247  |
| ARMS2        | 0.444 | -0.1224 | 0.0002  |
| LINC00343    | 0     | -0.1224 | 0.005   |
| ZNF806       | 0.023 | -0.1222 | 0.0436  |
| SLC24A2      | 0.699 | -0.1218 | 0.0426  |
| LINC00486    | 0.328 | -0.1216 | 0.0041  |
| NTSR2        | 0.559 | -0.1216 | 0.0158  |
| HCN1         | 0.674 | -0.1216 | 0.0342  |
| CNGA3        | 0.744 | -0.1211 | 0.0436  |

|              |       |         |         |
|--------------|-------|---------|---------|
| LOC101928809 | 0     | -0.121  | 0.0279  |
| ADAMTS12     | 0.684 | -0.1209 | 0.0264  |
| FAM71A       | 0.642 | -0.1208 | 0.0327  |
| FGF7         | 0.697 | -0.1206 | 0.0339  |
| DAZ4         | 0.479 | -0.1203 | 0.0013  |
| ASH2L        | 0.631 | -0.1202 | 0.017   |
| TMPRSS12     | 0     | -0.1199 | <0.0001 |
| OR3A1        | 0.606 | -0.1198 | 0.0249  |
| ZMAT4        | 0.562 | -0.1194 | 0.0213  |
| LOC103344931 | 0     | -0.1191 | 0.0179  |
| KRT25        | 0.629 | -0.119  | 0.0329  |
| CLDN17       | 0.728 | -0.119  | 0.0451  |
| PHEX-AS1     | 0     | -0.1189 | 0.0062  |
| C1orf87      | 0.678 | -0.1189 | 0.0498  |
| ZSCAN4       | 0.421 | -0.1189 | <0.0001 |
| CNBD1        | 0.544 | -0.1187 | 0.0172  |
| IRGC         | 0.656 | -0.1187 | 0.0253  |
| CER1         | 0.741 | -0.1187 | 0.0499  |
| IRS4         | 0.55  | -0.1186 | 0.0099  |
| SNTG2        | 0.355 | -0.1183 | <0.0001 |
| LOC100505658 | 0     | -0.1182 | 0.0234  |
| LOC101927620 | 0     | -0.1181 | 0.0317  |
| SUSD5        | 0.587 | -0.118  | 0.0233  |
| LOC100506675 | 0     | -0.118  | 0.0243  |
| LINC00309    | 0     | -0.1179 | 0.0042  |
| LOC101928865 | 0     | -0.1179 | 0.0321  |
| OR10H4       | 0.335 | -0.1172 | 0.0008  |
| IQCF4        | 0.12  | -0.117  | 0.0185  |
| C8orf74      | 0.616 | -0.117  | 0.045   |
| DDI1         | 0.614 | -0.1169 | 0.0316  |
| FREM3        | 0.547 | -0.1169 | 0.0337  |
| TAS2R45      | 0.252 | -0.1168 | 0.0009  |
| LINC00692    | 0.456 | -0.1167 | 0.0069  |
| CBLC         | 0.659 | -0.1162 | 0.0258  |

|              |       |         |         |
|--------------|-------|---------|---------|
| IL17C        | 0.612 | -0.1162 | 0.0315  |
| LOC440313    | 0.449 | -0.116  | 0.0411  |
| LYZL6        | 0.709 | -0.1159 | 0.0451  |
| MIR18B       | 0     | -0.1157 | 0.0417  |
| C6orf203     | 0.354 | -0.1154 | <0.0001 |
| KRTAP9-9     | 0.336 | -0.1153 | 0.0006  |
| OR4K17       | 0.437 | -0.115  | 0.0009  |
| OR2G3        | 0.498 | -0.1149 | 0.0014  |
| INSL5        | 0.544 | -0.1148 | 0.0125  |
| ADAM7        | 0.694 | -0.1146 | 0.0413  |
| VWDE         | 0.288 | -0.1144 | 0.0004  |
| POTEA        | 0.36  | -0.1139 | 0.0166  |
| OR7A10       | 0.417 | -0.1137 | <0.0001 |
| OR8D4        | 0.487 | -0.1136 | 0.0014  |
| SPAM1        | 0.555 | -0.1133 | 0.0235  |
| TRUB2        | 0.531 | -0.1133 | 0.0298  |
| LOC339298    | 0.495 | -0.1123 | 0.0304  |
| ZG16B        | 0.26  | -0.1122 | 0.0006  |
| LOC101928739 | 0     | -0.1122 | 0.0414  |
| LOC101928012 | 0     | -0.112  | 0.0417  |
| ROPN1        | 0.522 | -0.1101 | 0.0412  |
| LINC00314    | 0.075 | -0.11   | 0.0063  |
| KCNA1        | 0.559 | -0.11   | 0.017   |
| TBC1D3C      | 0.494 | -0.11   | 0.0494  |
| LINC01398    | 0     | -0.1099 | 0.0151  |
| SLC13A1      | 0.588 | -0.109  | 0.0345  |
| KCNJ9        | 0.597 | -0.1083 | 0.0285  |
| KRT38        | 0.632 | -0.108  | 0.0379  |
| SPRED2       | 0.616 | -0.108  | 0.0409  |
| C11orf87     | 0.398 | -0.1074 | 0.0004  |
| MIR211       | 0     | -0.1063 | 0.0486  |
| OR4K15       | 0.276 | -0.1061 | 0.0101  |
| PRSS54       | 0.178 | -0.1058 | 0.0011  |
| LOC100507283 | 0.109 | -0.1054 | 0.0454  |



|              |       |         |         |
|--------------|-------|---------|---------|
| ZNF215       | 0.469 | -0.1049 | <0.0001 |
| MIR3663HG    | 0     | -0.1047 | 0.0207  |
| MIR409       | 0     | -0.1047 | 0.0221  |
| OR5F1        | 0.418 | -0.1041 | 0.0089  |
| TMEM108-AS1  | 0     | -0.1038 | 0.0217  |
| OR4X1        | 0.468 | -0.1036 | 0.0101  |
| OR1S1        | 0.197 | -0.1036 | 0.0445  |
| LOC441204    | 0.392 | -0.1032 | 0.0021  |
| LOC100505918 | 0.464 | -0.1032 | 0.0481  |
| LOC652276    | 0.464 | -0.1031 | 0.0026  |
| MIR181B1     | 0.382 | -0.1025 | 0.0218  |
| KRTAP3-3     | 0.309 | -0.1022 | 0.001   |
| HMGB3P1      | 0.278 | -0.1009 | 0.0081  |
| OR4K2        | 0     | -0.1004 | 0.0055  |
| MIR181C      | 0     | -0.1004 | 0.0243  |
| PLCG1-AS1    | 0     | -0.1003 | 0.0255  |
| OR10K1       | 0.491 | -0.0994 | 0.0056  |
| CCDC141      | 0.553 | -0.0984 | 0.0457  |
| TSHZ2        | 0.554 | -0.0983 | 0.0445  |
| GLIPR1L2     | 0.465 | -0.0972 | 0.001   |
| FAT2         | 0.589 | -0.0967 | 0.042   |
| LINC00901    | 0.435 | -0.0966 | 0.0269  |
| EGFLAM-AS2   | 0     | -0.0965 | 0.0273  |
| DDX43        | 0.508 | -0.0963 | 0.0271  |
| TMEM177      | 0.438 | -0.0957 | 0.0004  |
| TSPAN16      | 0.496 | -0.0954 | 0.0011  |
| OR5E1P       | 0.279 | -0.0954 | 0.0086  |
| PATE4        | 0.441 | -0.0954 | 0.0451  |
| KRTAP2-4     | 0.495 | -0.0947 | 0.0111  |
| CPLX4        | 0.474 | -0.0934 | 0.0037  |
| MIR208A      | 0.242 | -0.0933 | 0.0366  |
| EDNRB-AS1    | 0     | -0.0925 | 0.0409  |
| MACROD2-AS1  | 0     | -0.0923 | 0.0319  |
| ASIP         | 0.582 | -0.0923 | 0.0434  |

|              |       |         |        |
|--------------|-------|---------|--------|
| NAALADL2-AS3 | 0.336 | -0.0921 | 0.036  |
| LINC00358    | 0     | -0.0918 | 0.0352 |
| TRIM63       | 0.325 | -0.0917 | 0.0018 |
| PATE3        | 0     | -0.0909 | 0.0472 |
| TAAR1        | 0.392 | -0.0899 | 0.0021 |
| LINC00102    | 0.459 | -0.0898 | 0.0371 |
| FAM50B       | 0.486 | -0.0892 | 0.0003 |
| SSMEM1       | 0.37  | -0.0888 | 0.034  |
| SUN5         | 0.434 | -0.0875 | 0.0104 |
| OR6B3        | 0.243 | -0.0875 | 0.0143 |
| NATD1        | 0.341 | -0.0874 | 0.0431 |
| PNLDC1       | 0.47  | -0.087  | 0.0022 |
| FAM222A-AS1  | 0.492 | -0.0865 | 0.0382 |
| OR10V1       | 0.489 | -0.0864 | 0.0142 |
| LINC00708    | 0.275 | -0.0862 | 0.0481 |
| TOX          | 0.473 | -0.0843 | 0.0014 |
| GALNTL5      | 0.419 | -0.0836 | 0.0016 |
| OR5K3        | 0.359 | -0.0835 | 0.022  |
| LRRIQ1       | 0.494 | -0.083  | 0.0034 |
| CALHM1       | 0.452 | -0.0827 | 0.0051 |
| OR52M1       | 0.271 | -0.0823 | 0.0219 |
| IL19         | 0.415 | -0.0805 | 0.0015 |
| OPN5         | 0.453 | -0.0794 | 0.0067 |
| CATR1        | 0     | -0.0794 | 0.0204 |
| OR8J1        | 0.311 | -0.0793 | 0.0226 |
| TNS4         | 0.494 | -0.0786 | 0.003  |
| OR2M2        | 0.499 | -0.0762 | 0.0296 |
| UNC80        | 0.384 | -0.0757 | 0.0201 |
| KRTAP26-1    | 0.457 | -0.0731 | 0.037  |
| OR10S1       | 0.443 | -0.0725 | 0.0405 |
| KRTAP2-1     | 0.474 | -0.0722 | 0.0401 |
| KRTAP24-1    | 0.45  | -0.0722 | 0.0448 |
| CLCA2        | 0.496 | -0.0718 | 0.004  |
| TMPRSS11A    | 0.449 | -0.0716 | 0.0332 |

|           |       |         |        |
|-----------|-------|---------|--------|
| IGFL3     | 0.44  | -0.0696 | 0.0257 |
| TMPRSS11F | 0.242 | -0.0693 | 0.0472 |
| GAS2L2    | 0.411 | -0.0679 | 0.0114 |
| KLK9      | 0.489 | -0.0677 | 0.0381 |
| RBM46     | 0.486 | -0.0664 | 0.0315 |
| IL26      | 0.472 | -0.0641 | 0.0106 |
| GOT1L1    | 0.423 | -0.0616 | 0.0225 |

---
